# Supplementary material
Source: PubMed Central journal article supplement (PMC6885706)

NH<sub>2</sub>-V L E G N E Q F I N A A K-COOH

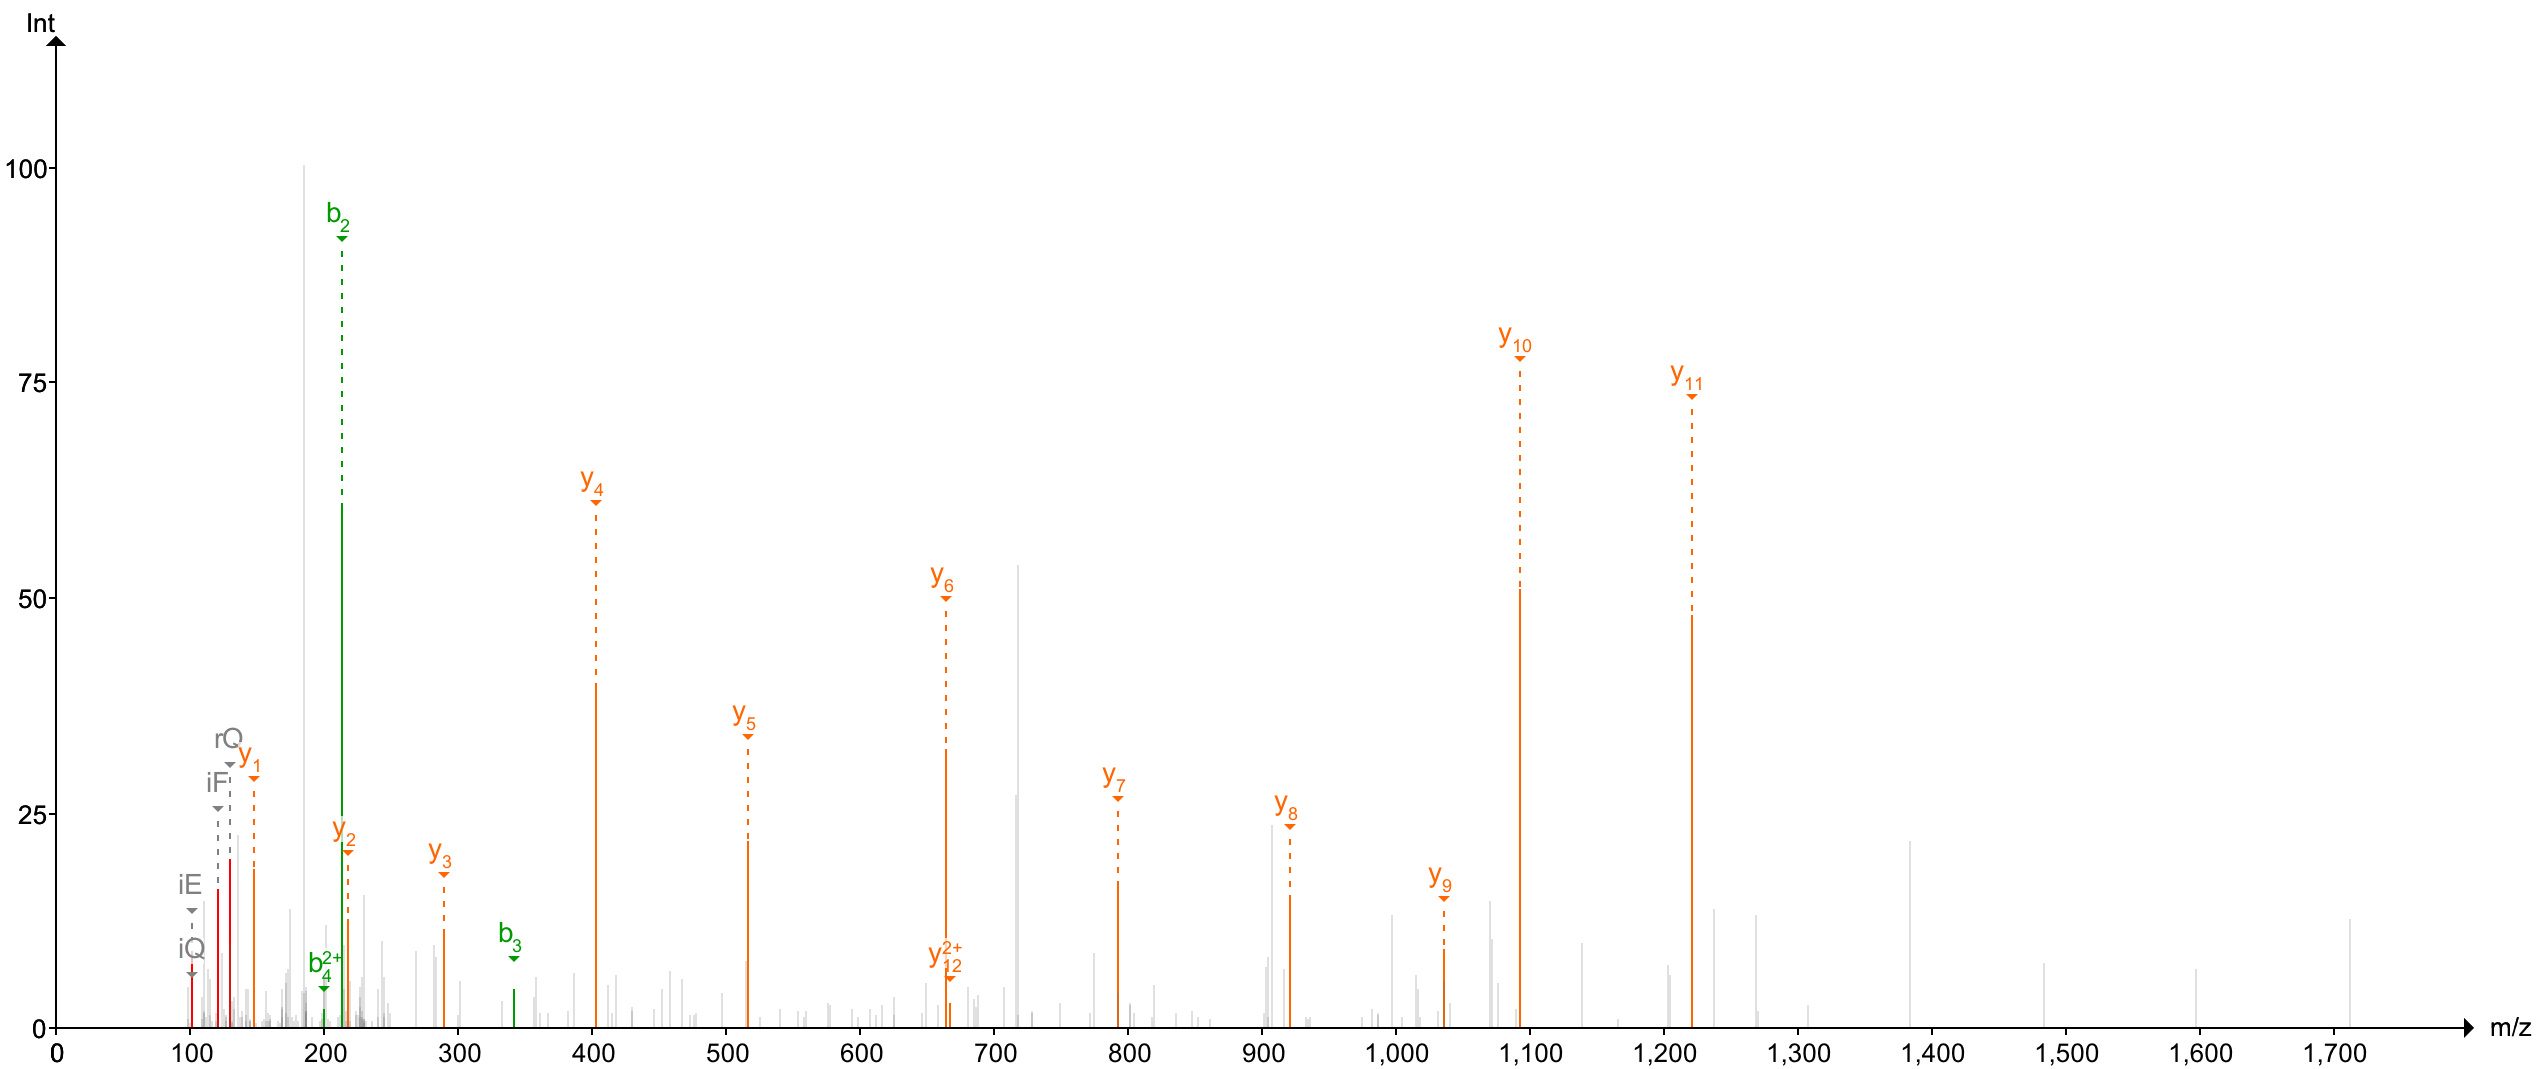

NH<sub>2</sub>-W L K V F T T F L S F A T T G A C S G L K-COOH

y<sub>8</sub>  
b<sub>12</sub>

y<sub>7</sub>  
b<sub>13</sub>

y<sub>5</sub>  
b<sub>15</sub>

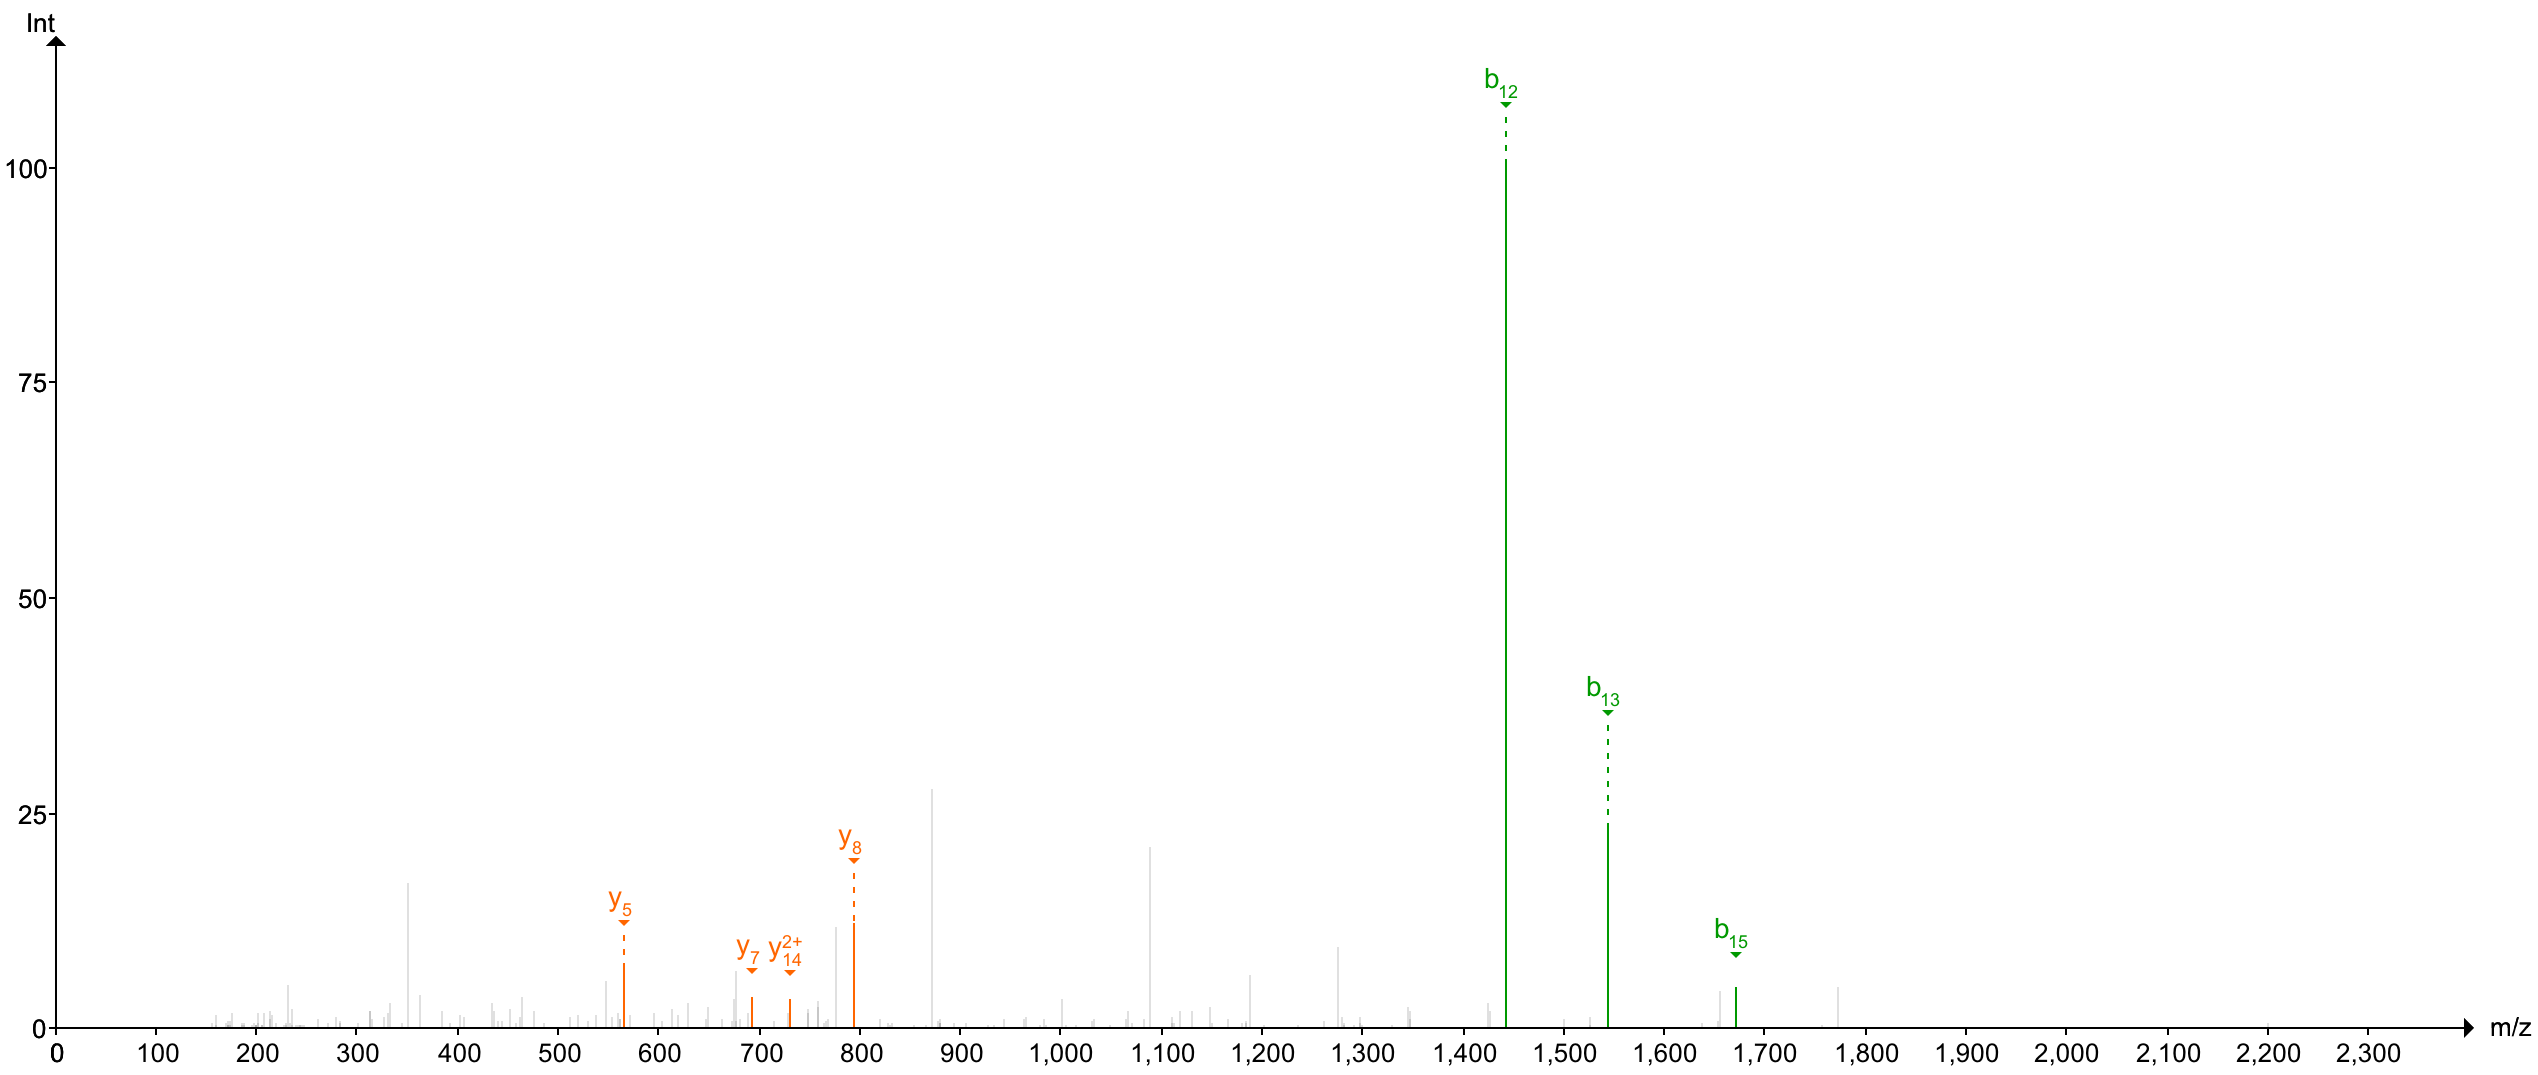

Acetyl-F T S G L<sub>1</sub>T E S<sub>1</sub>T<sub>2</sub>Y<sub>2</sub>Q<sub>1</sub>K-COOH  
b<sub>5</sub> b<sub>8</sub> b<sub>10</sub>

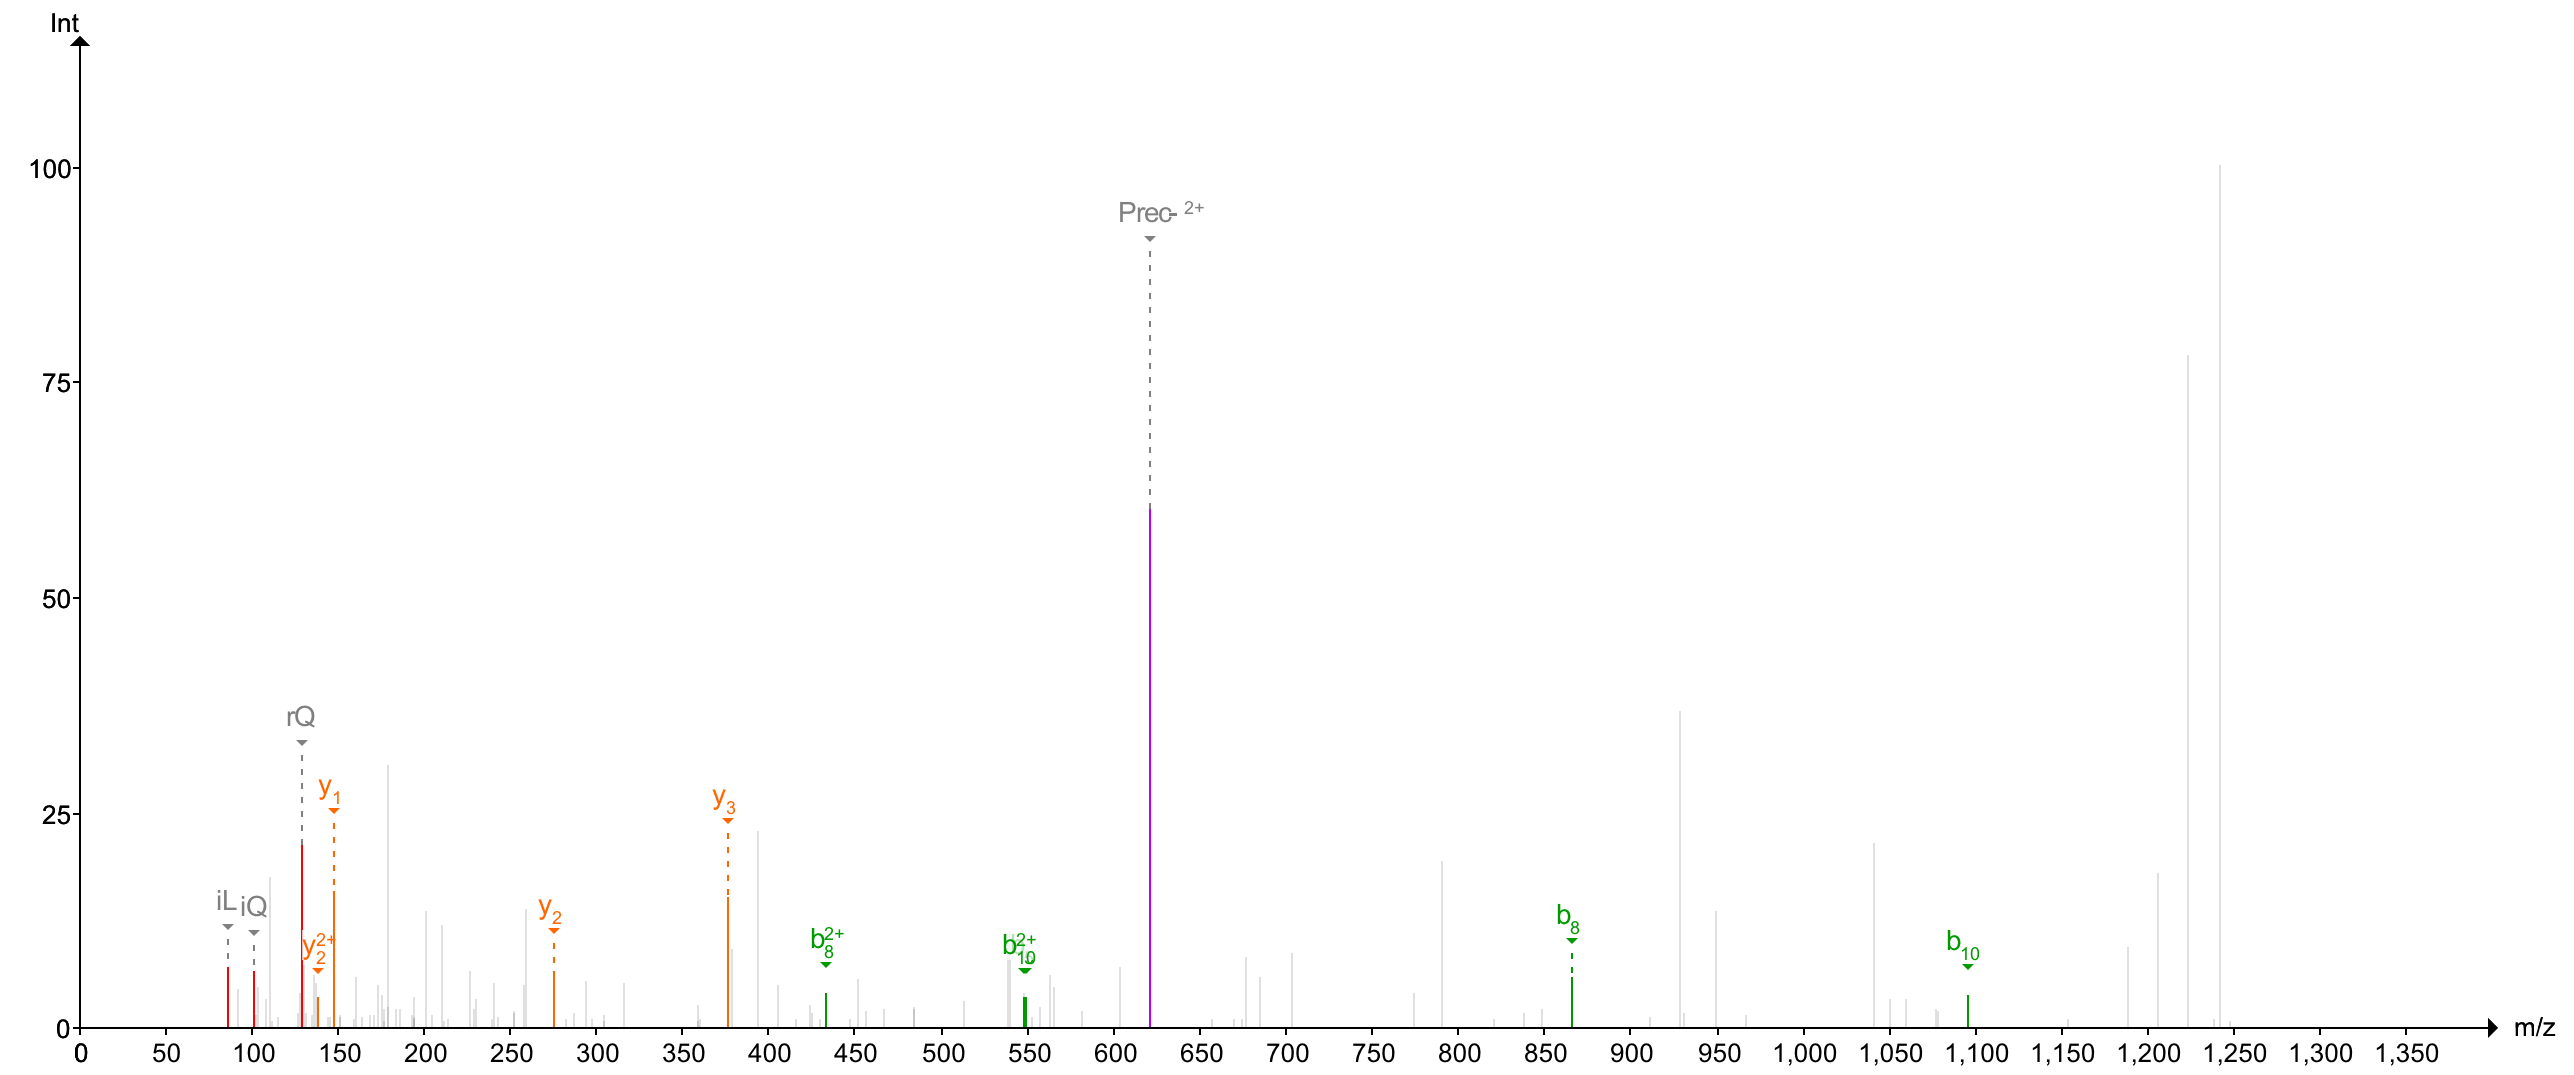

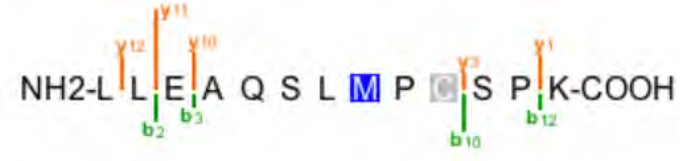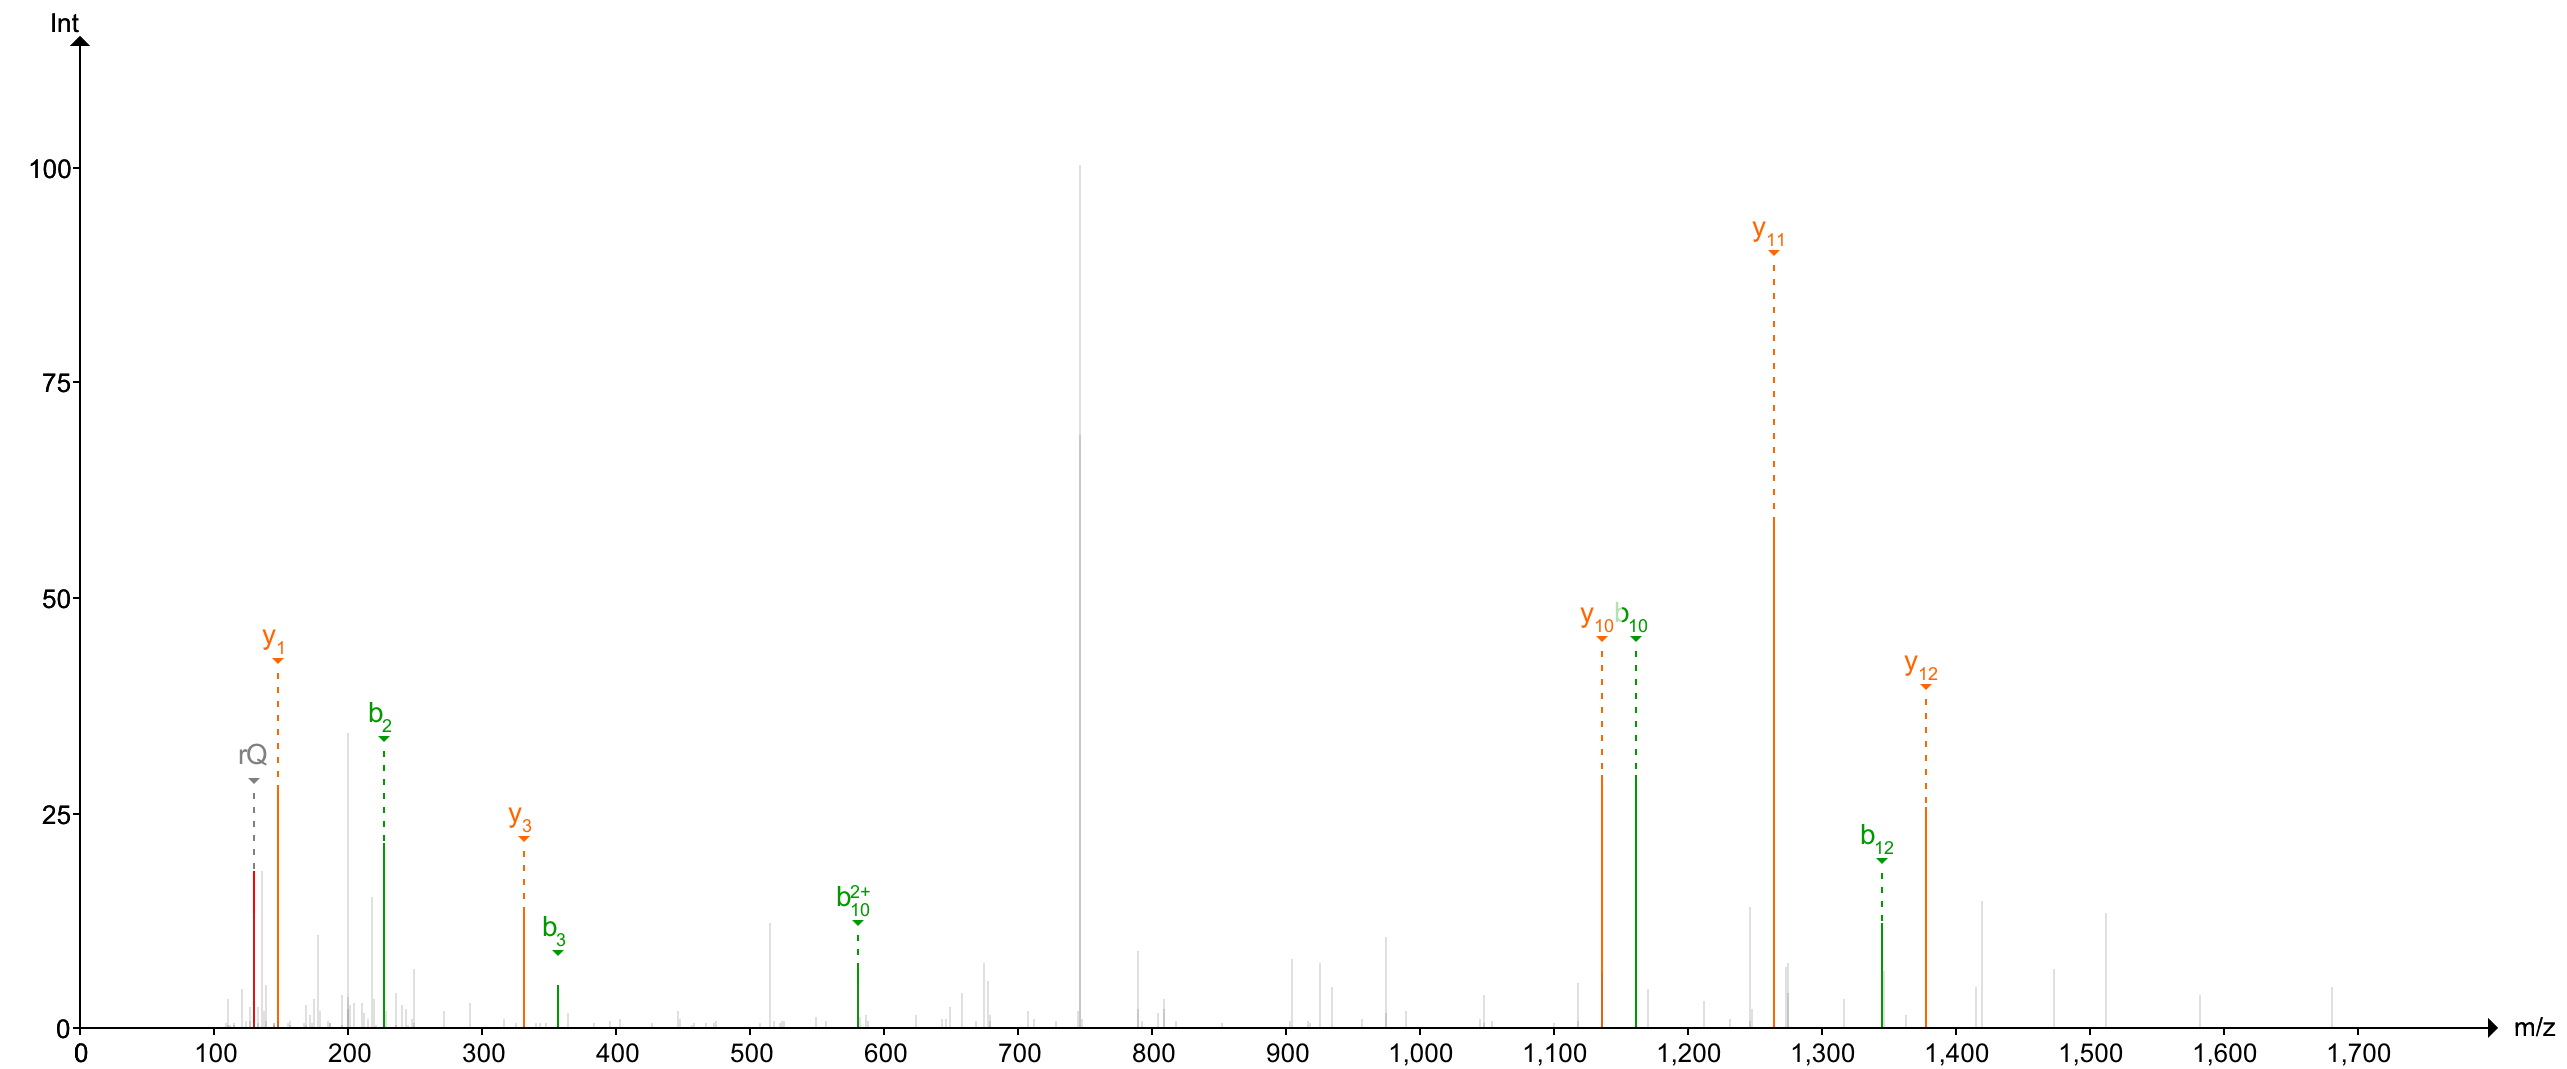

NH<sub>2</sub>-L<sup>Y</sup>S<sup>Y</sup>E<sup>Y</sup>S<sup>Y</sup>A T P D L<sup>Y</sup>R-COOH  
b<sub>2</sub> b<sub>4</sub>

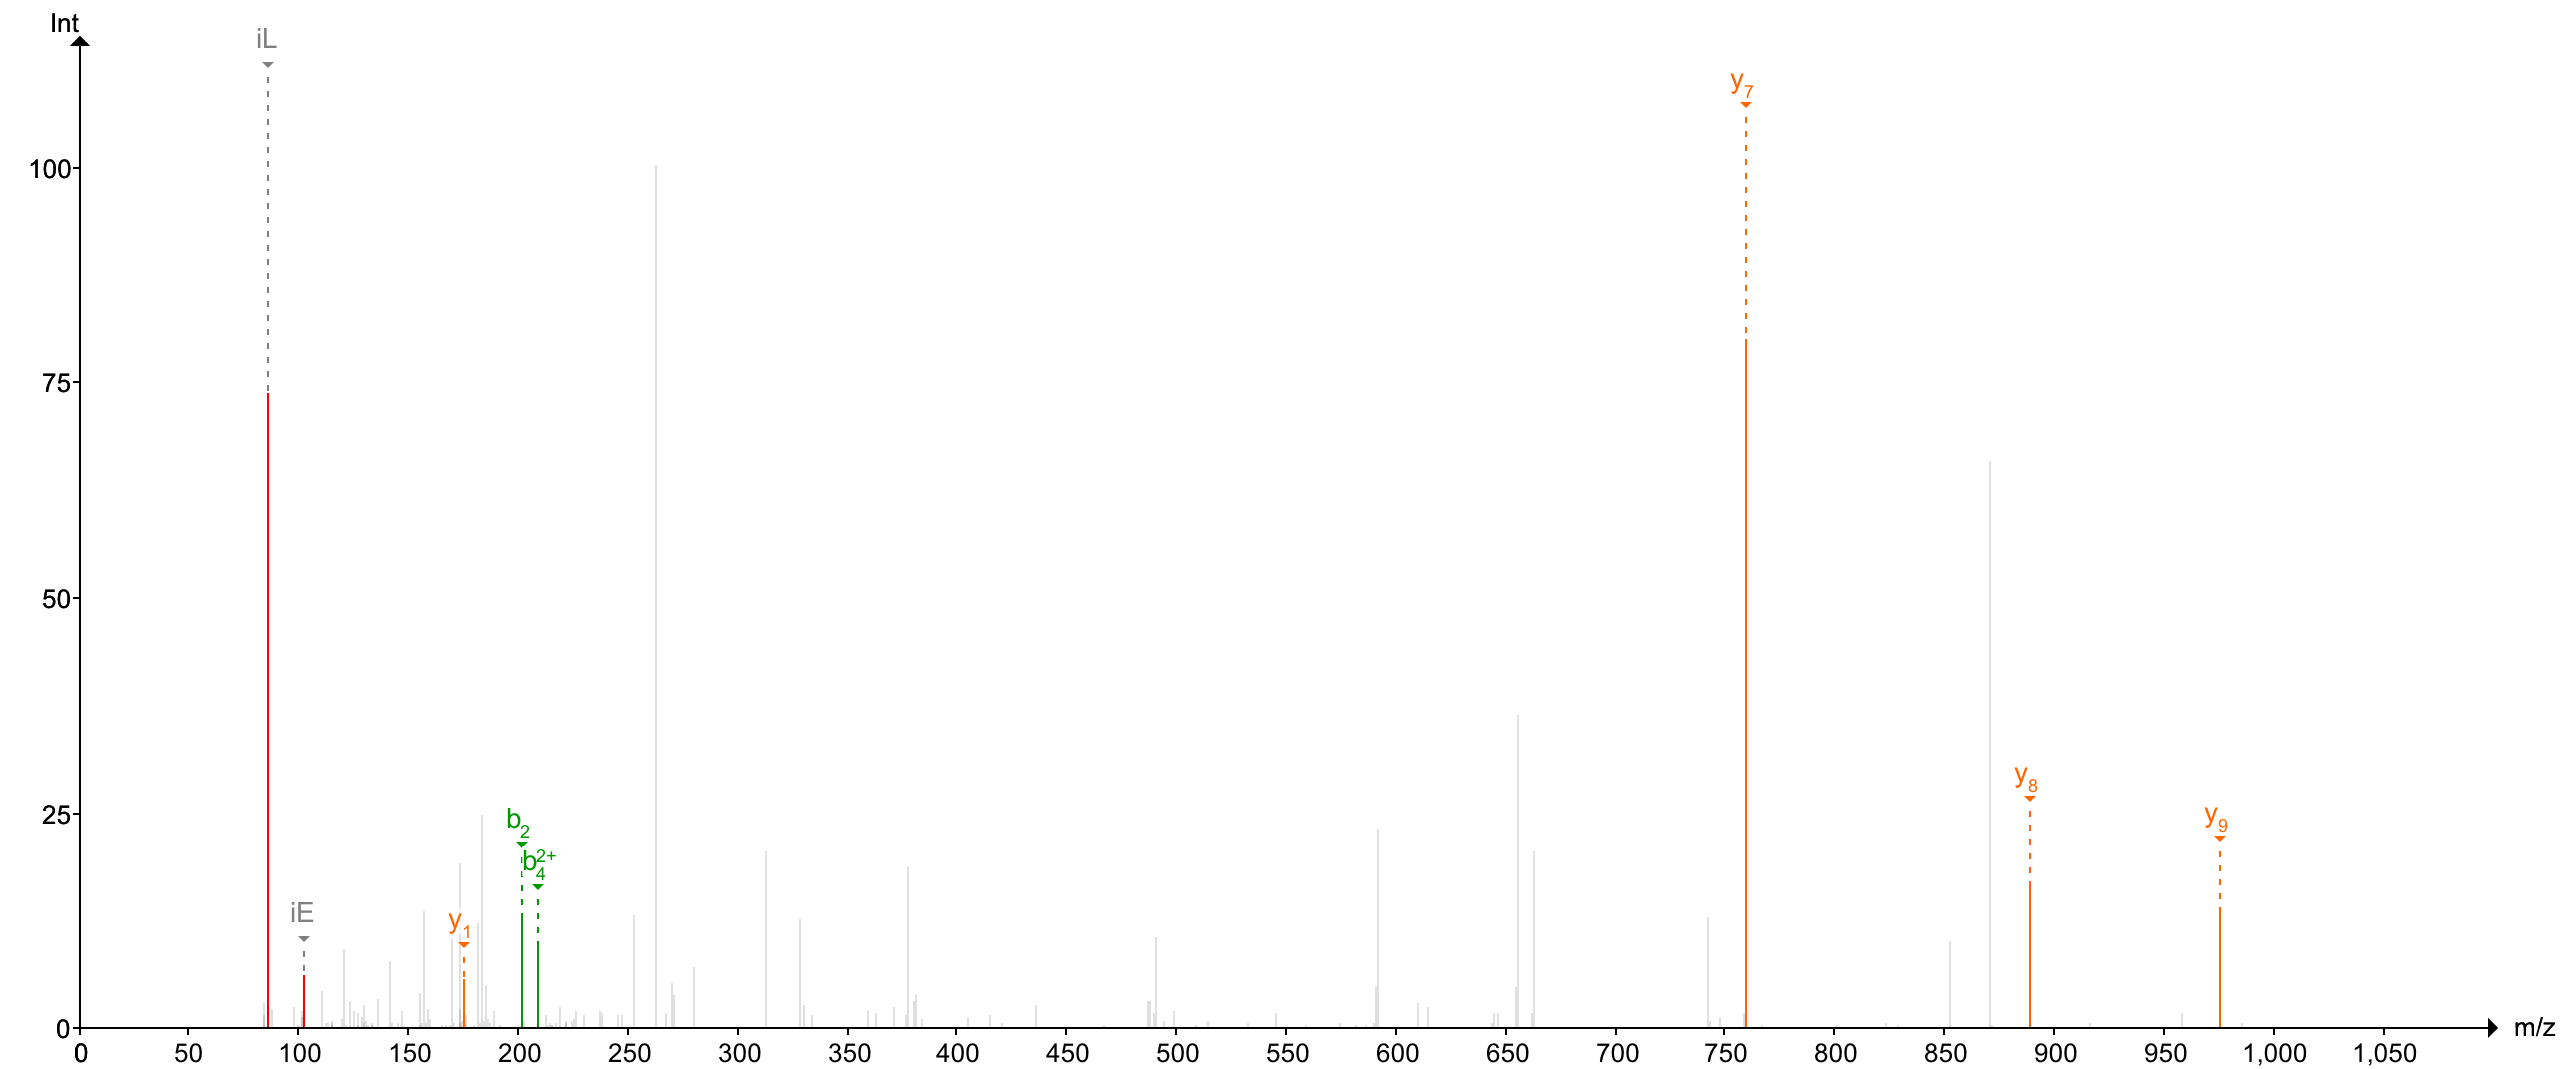

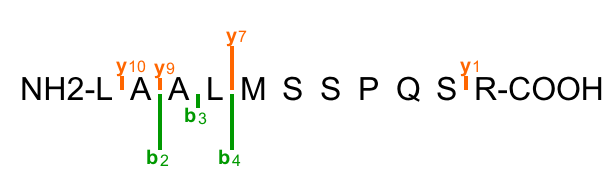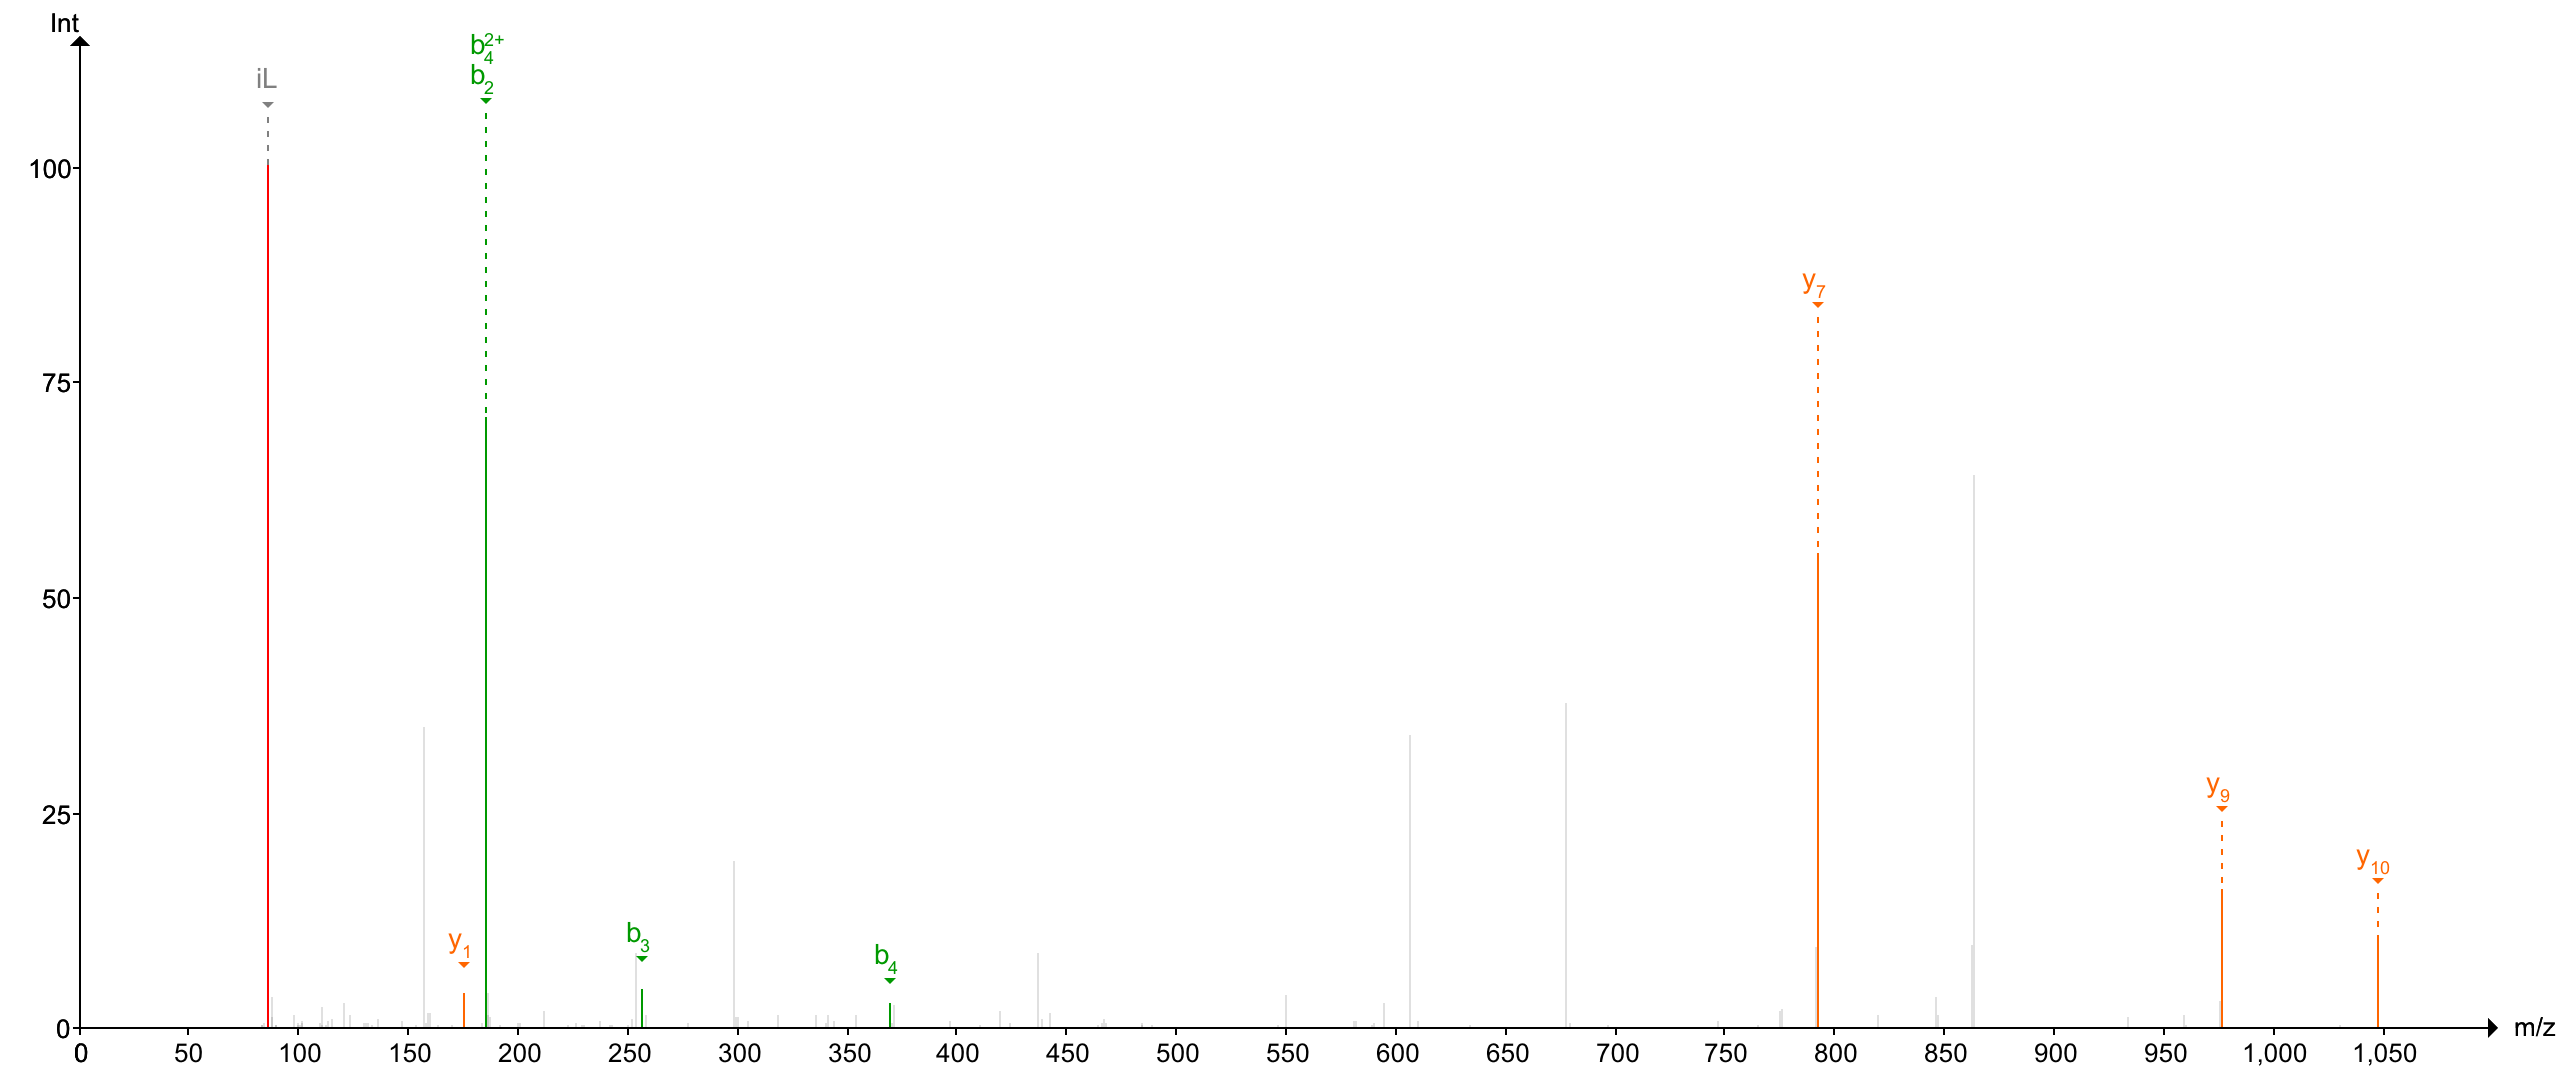

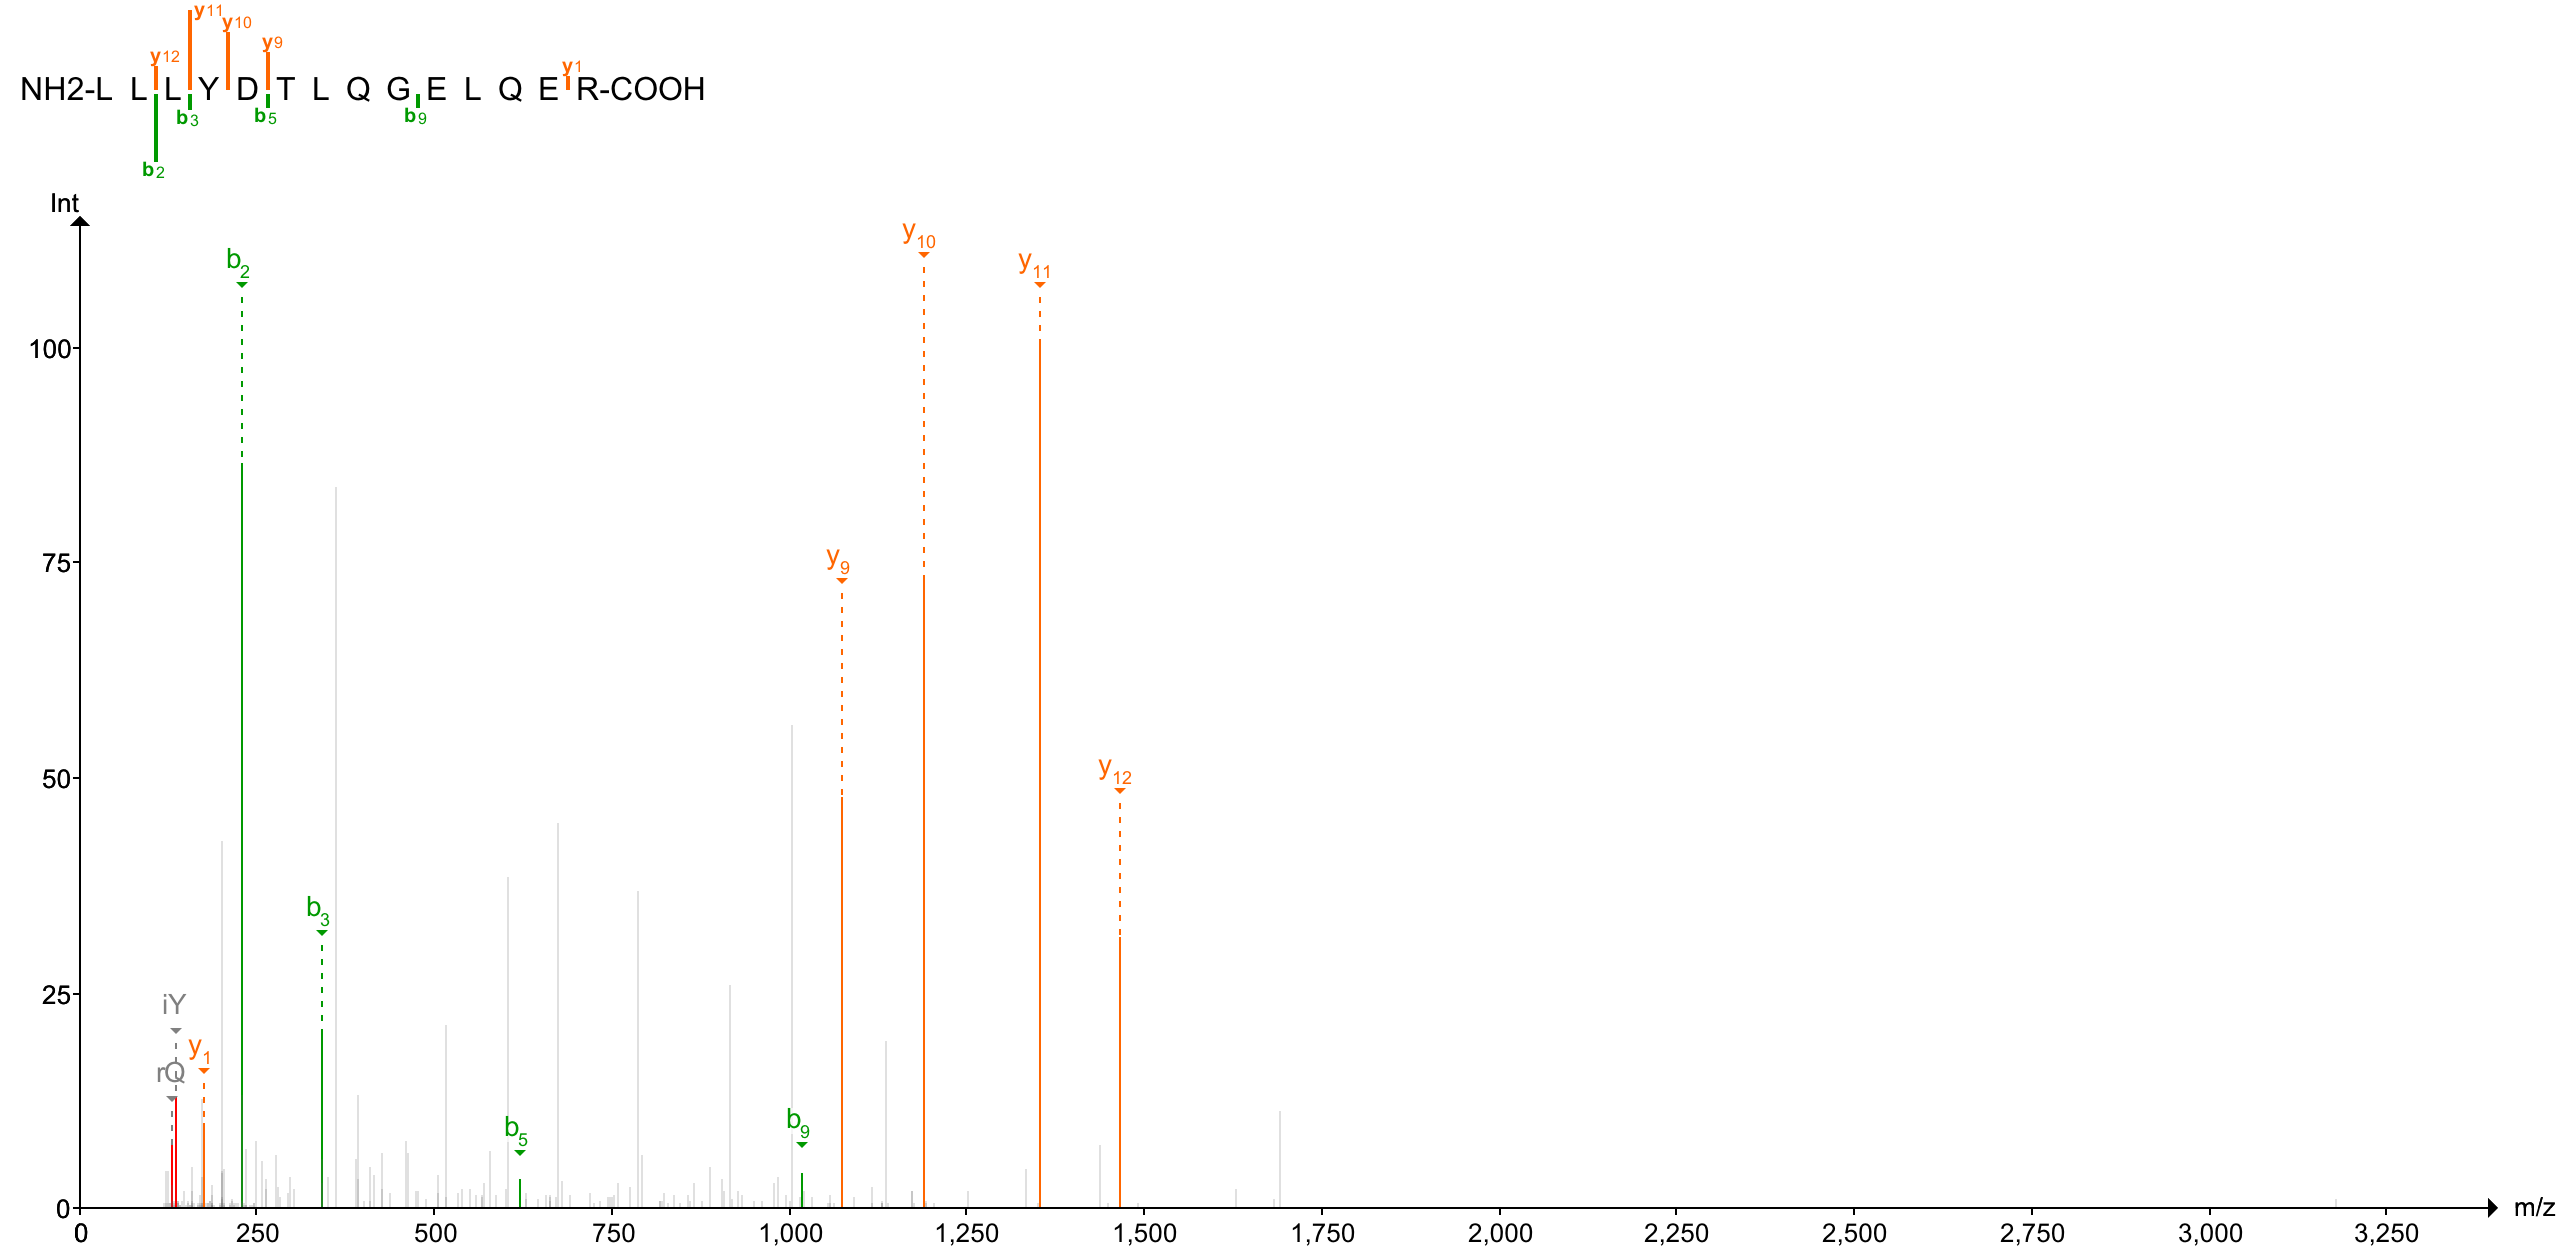

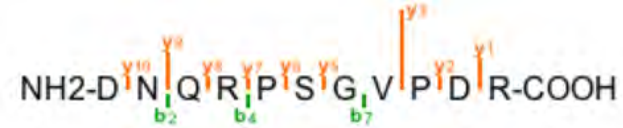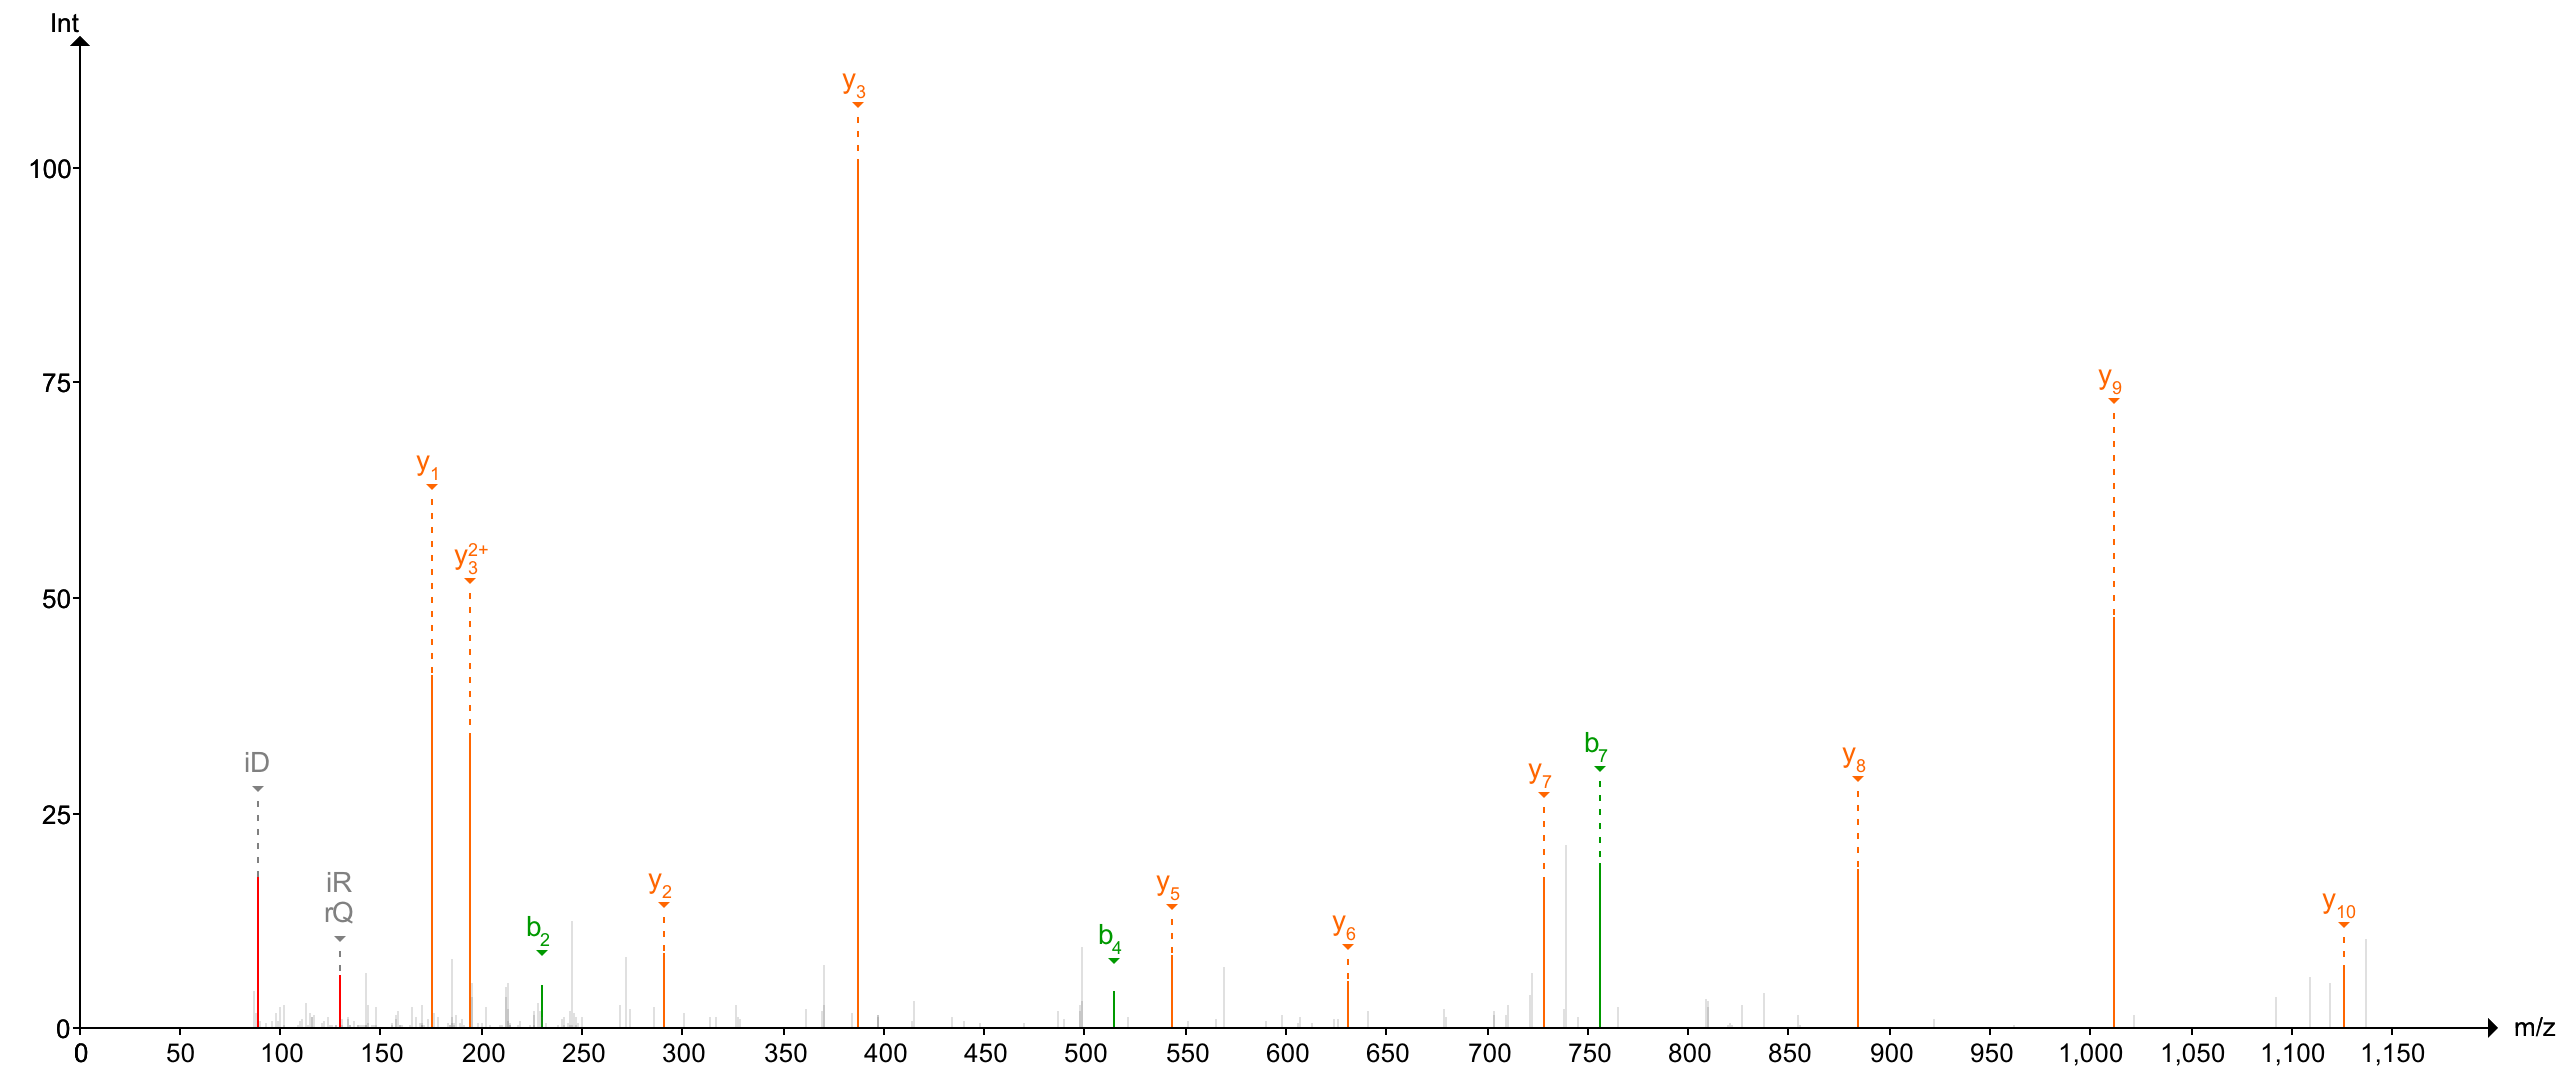



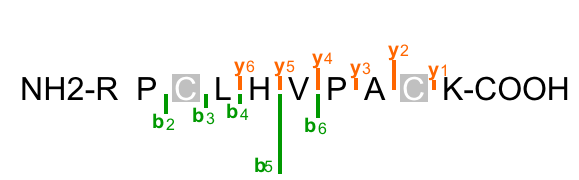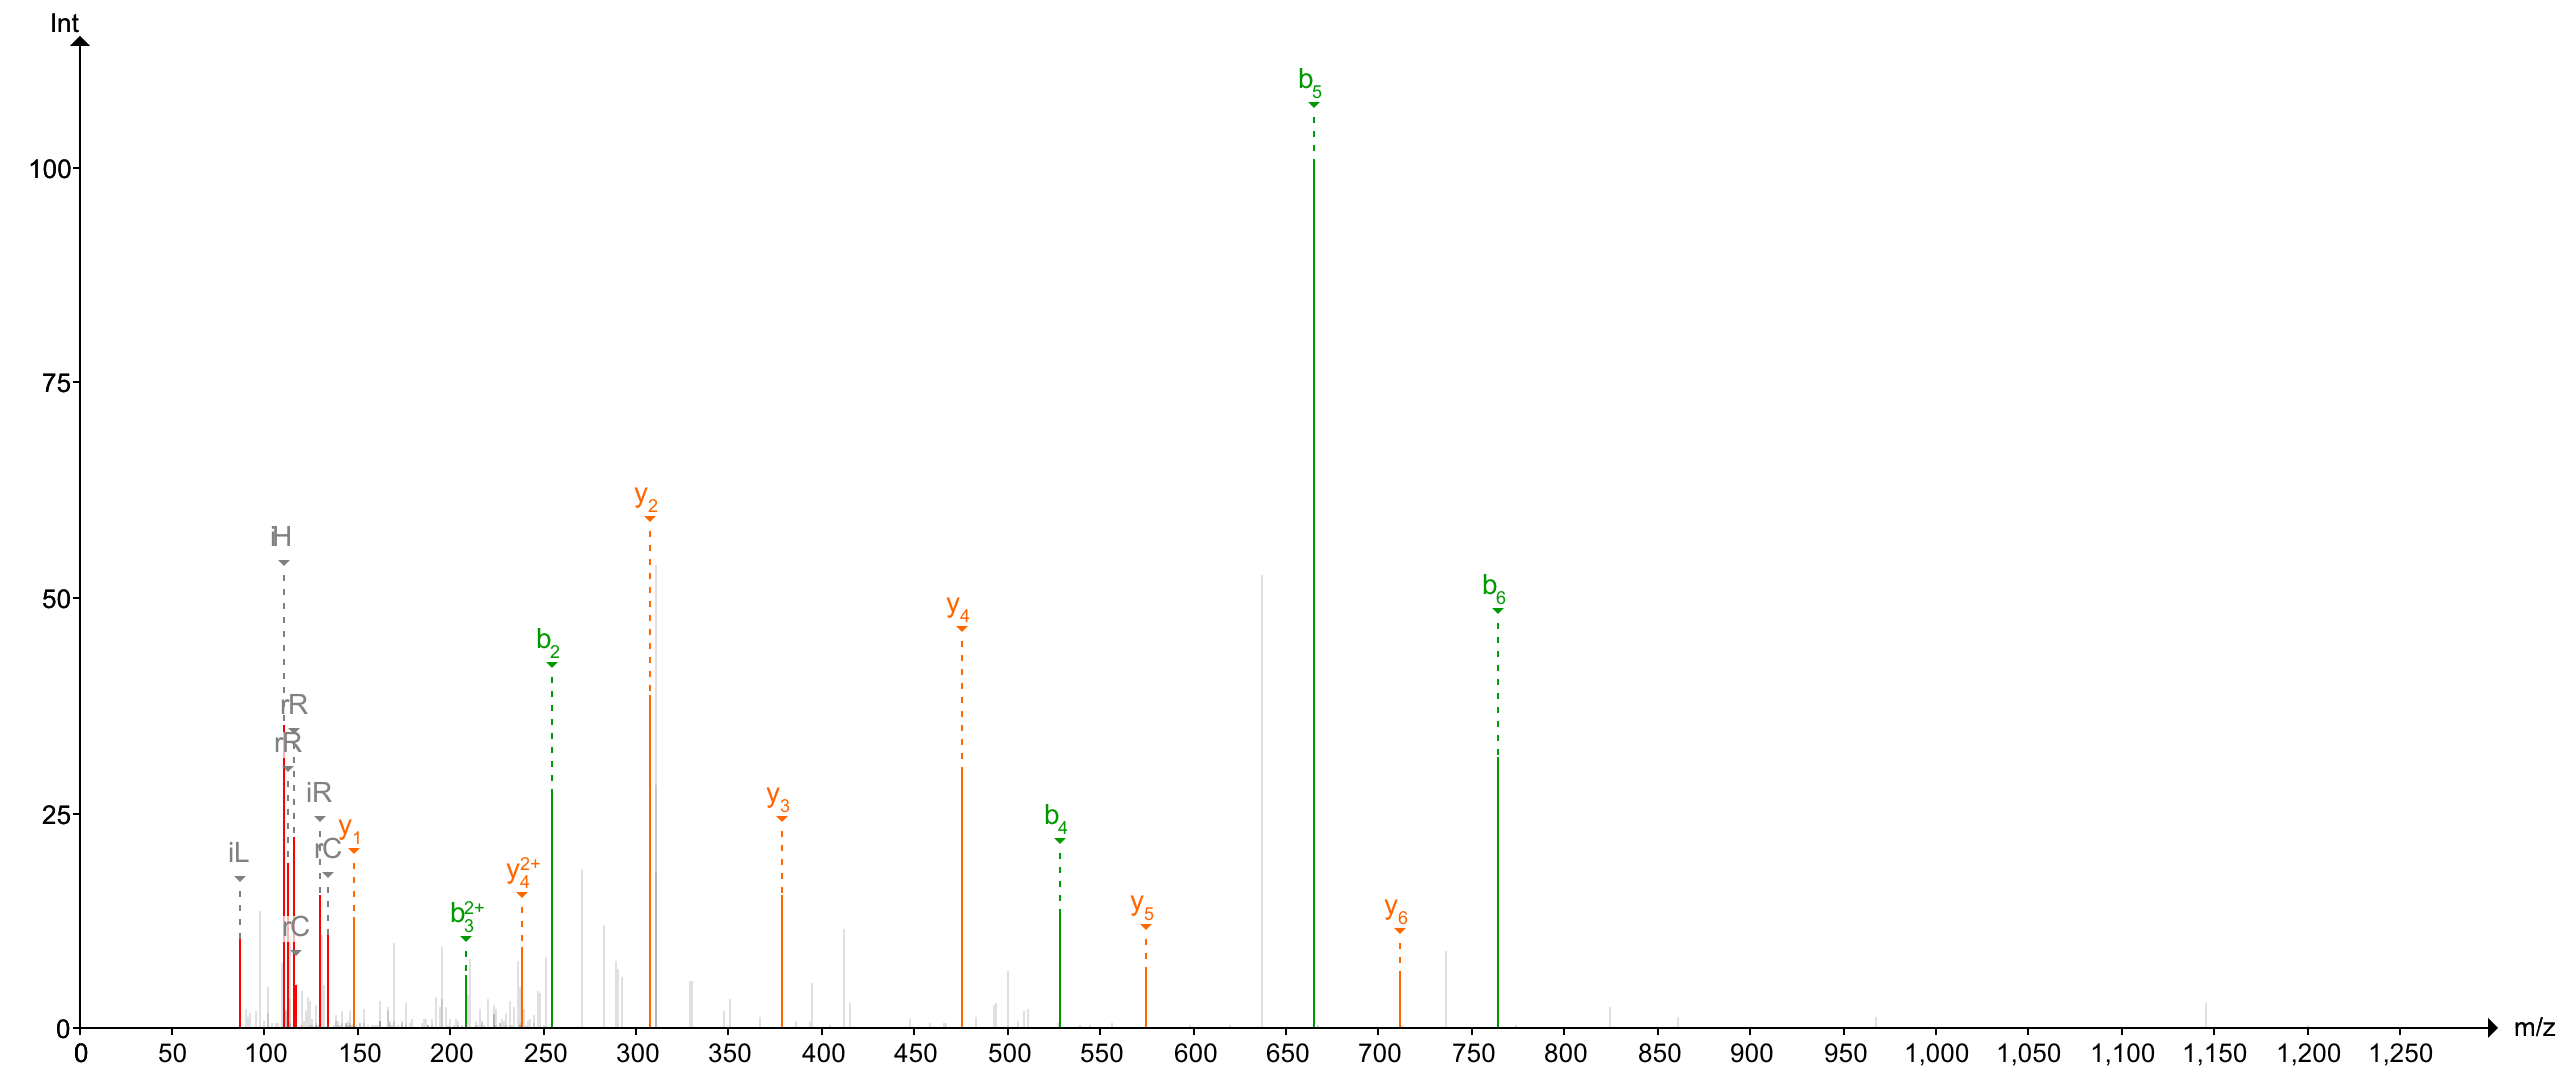

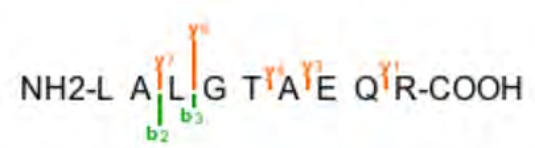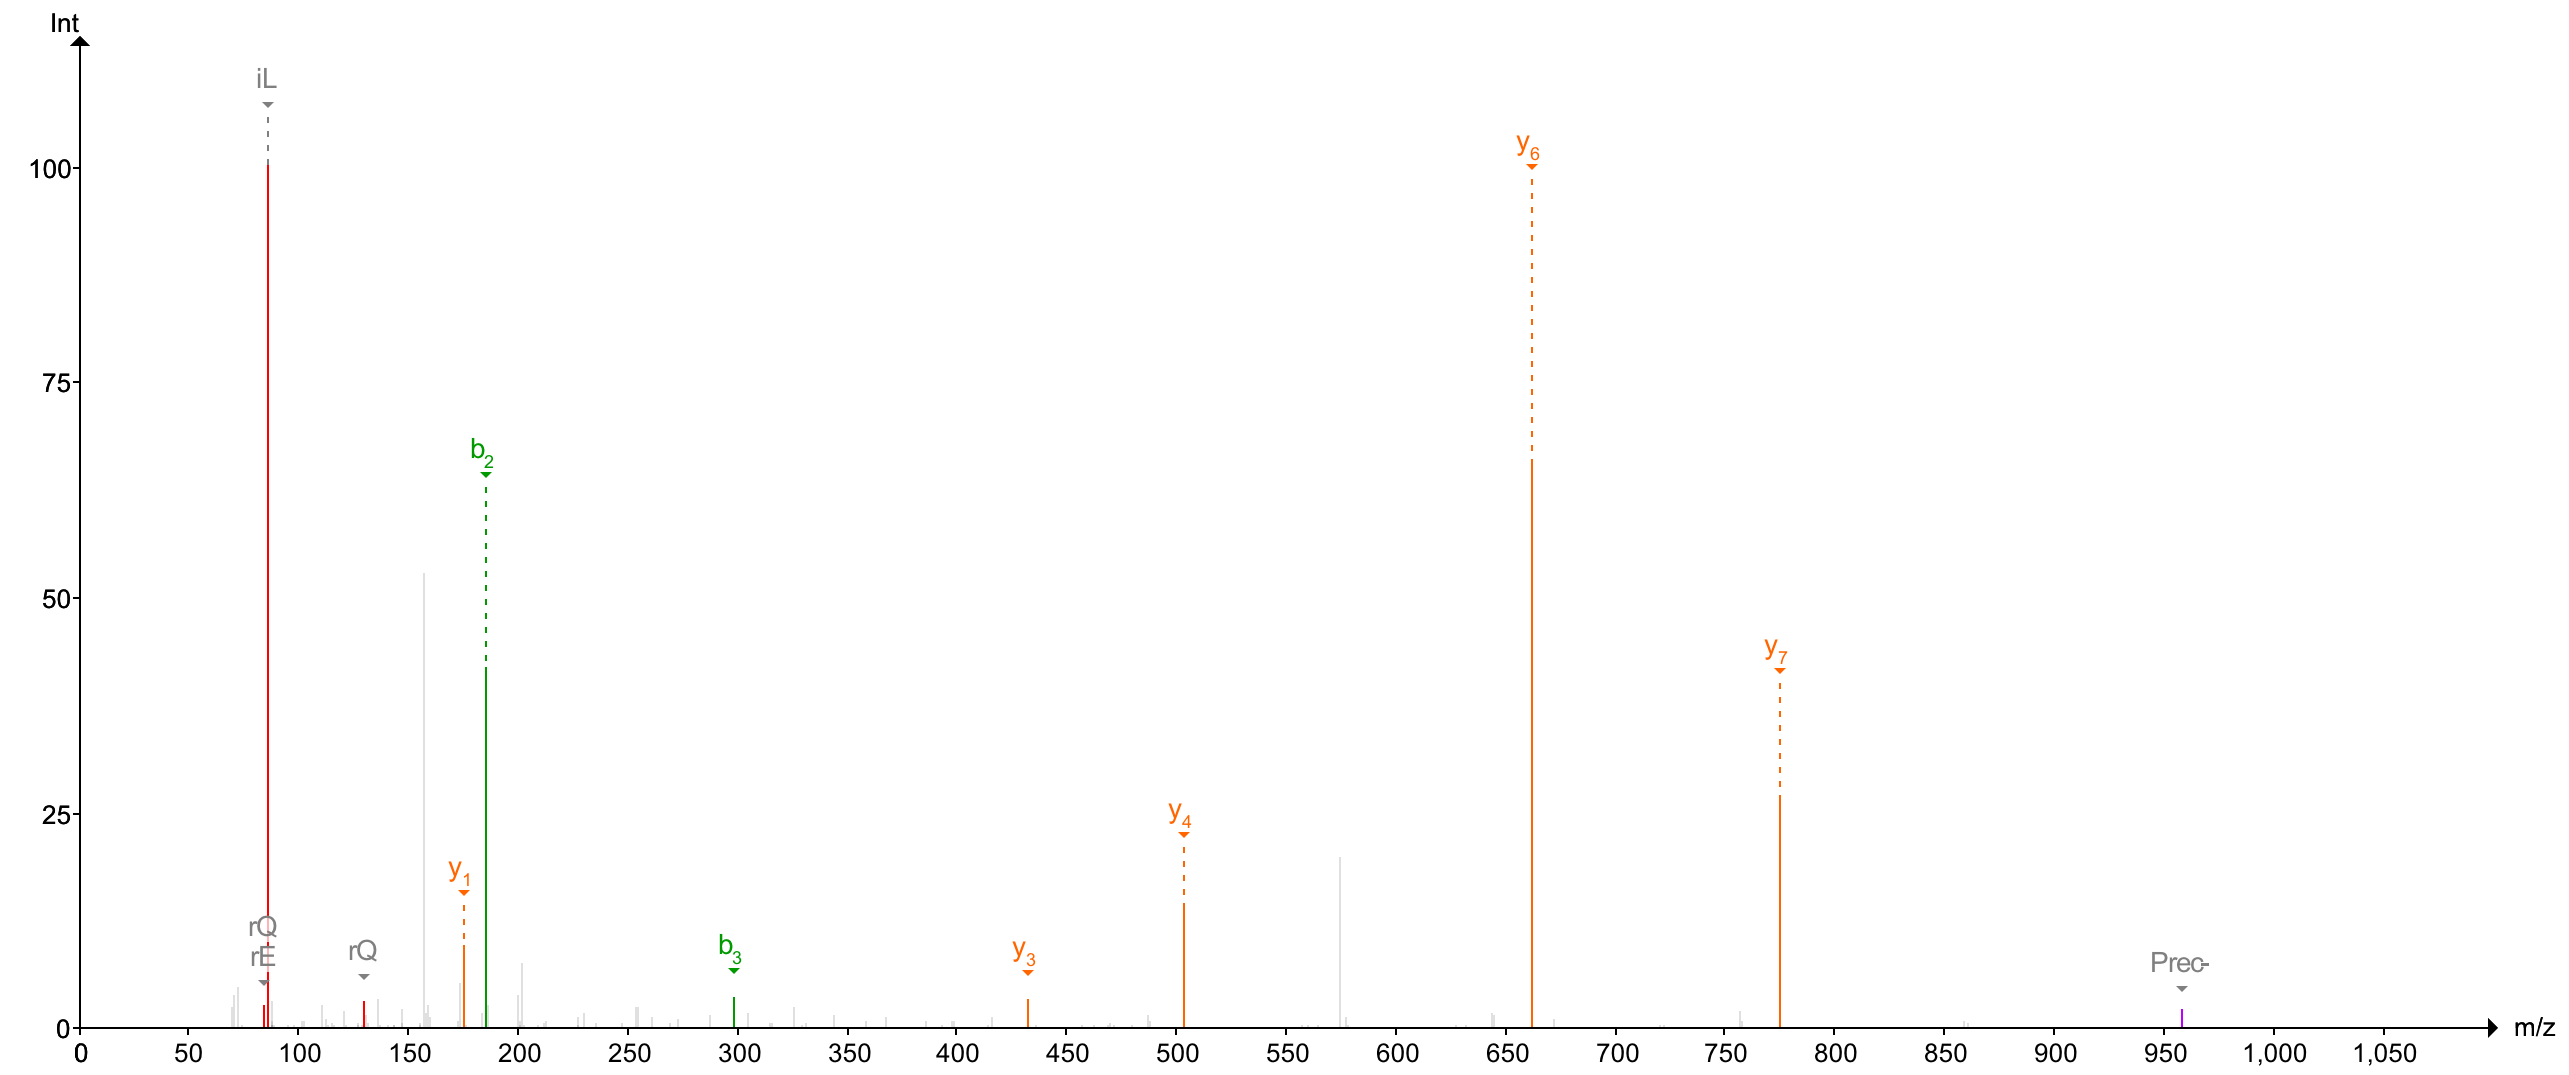



NH<sub>2</sub>-L L I F D T S N L Q S G V P S R-COOH

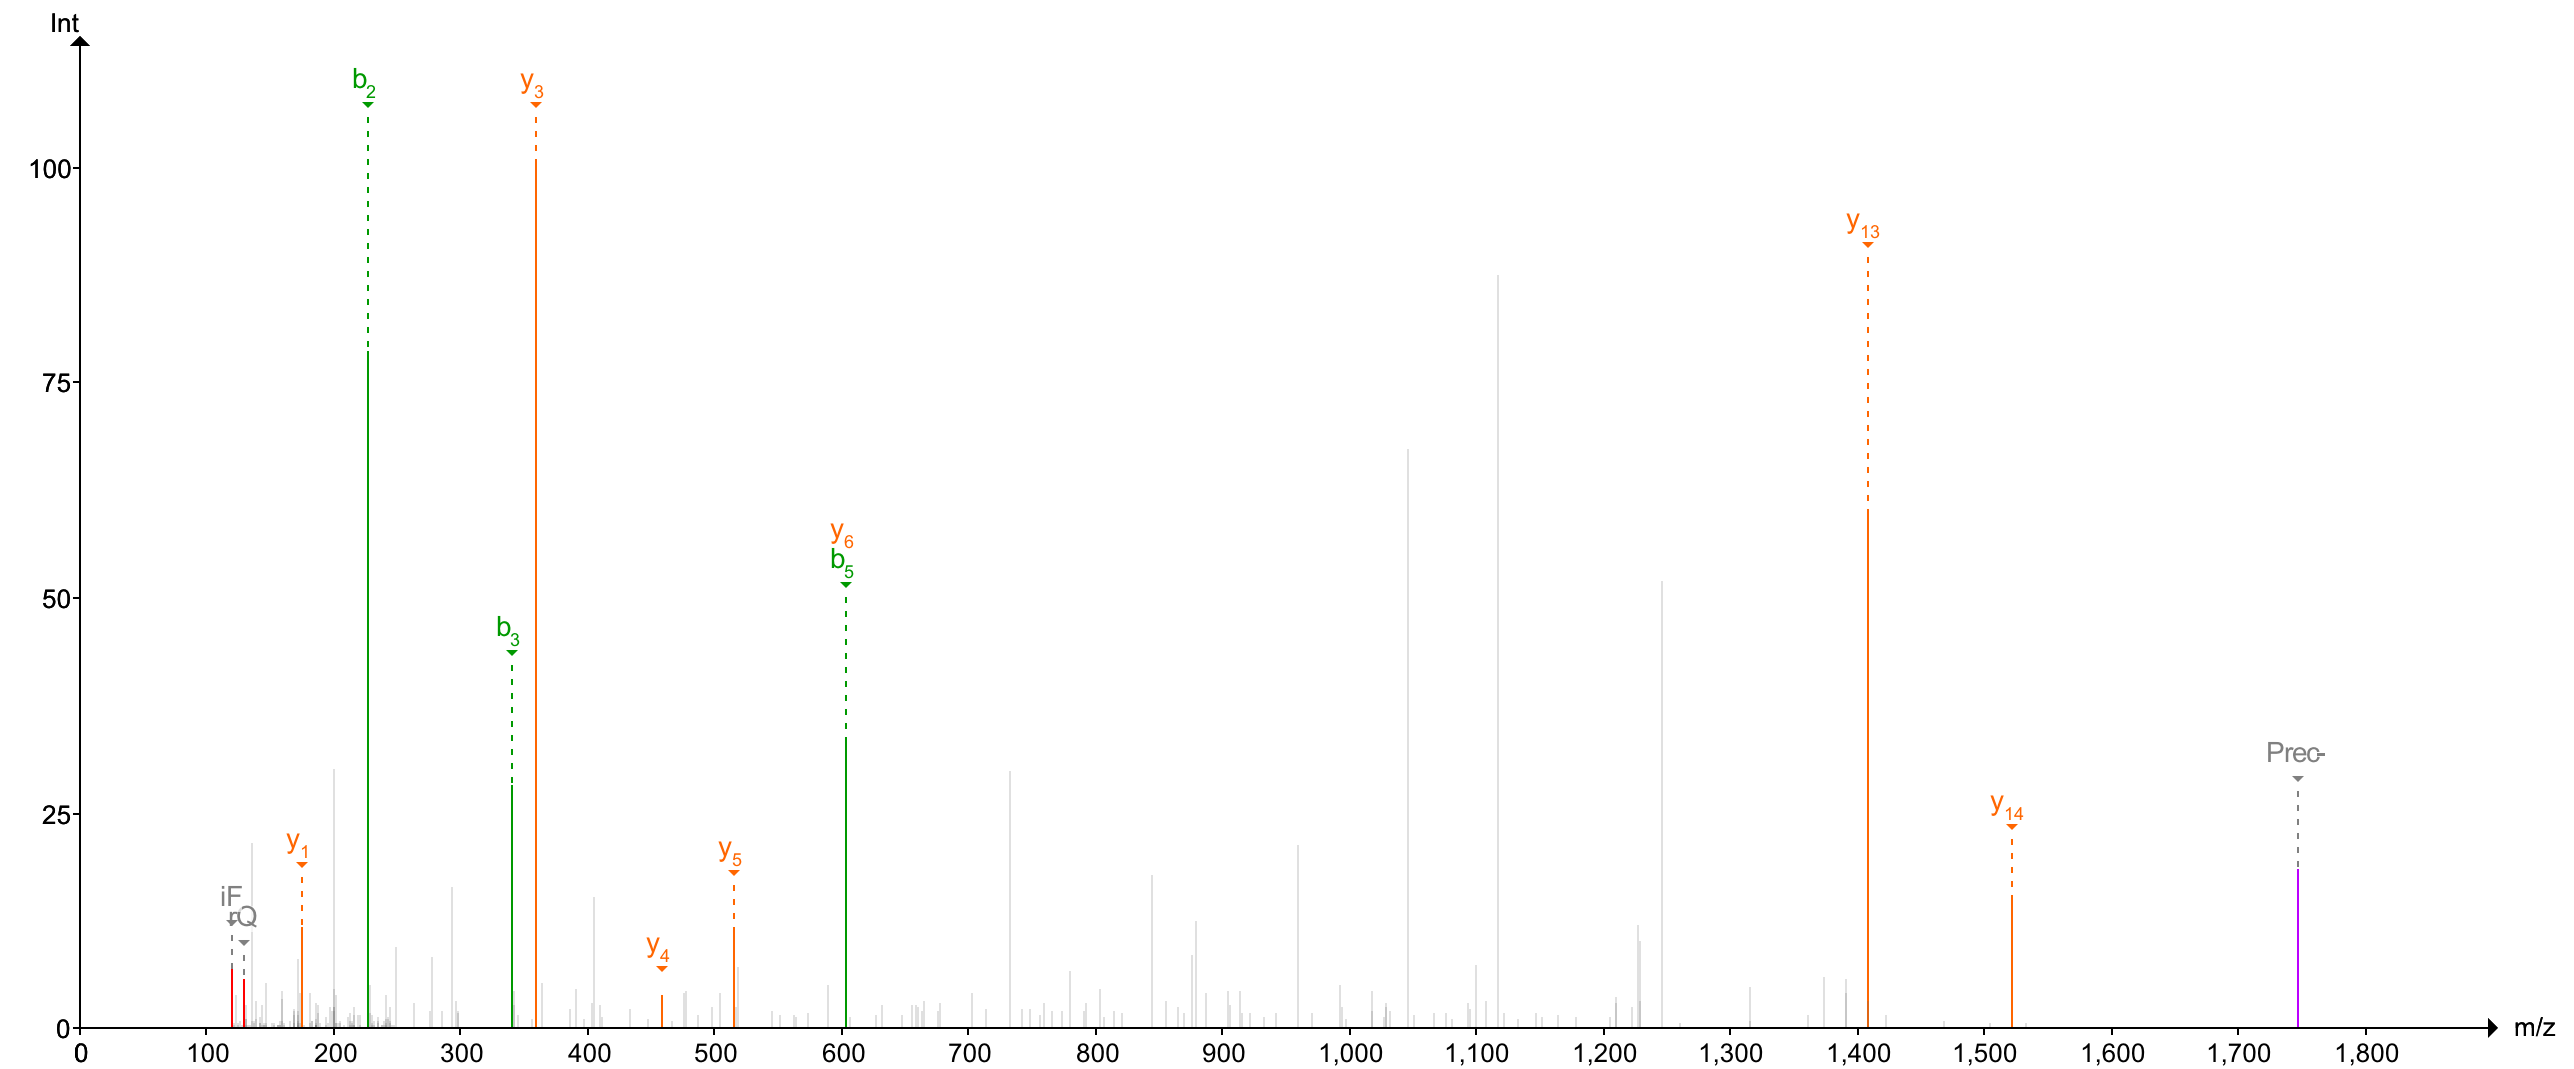

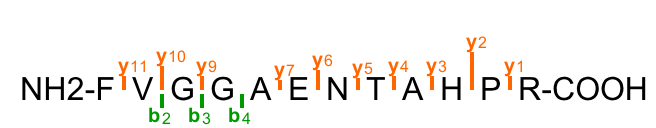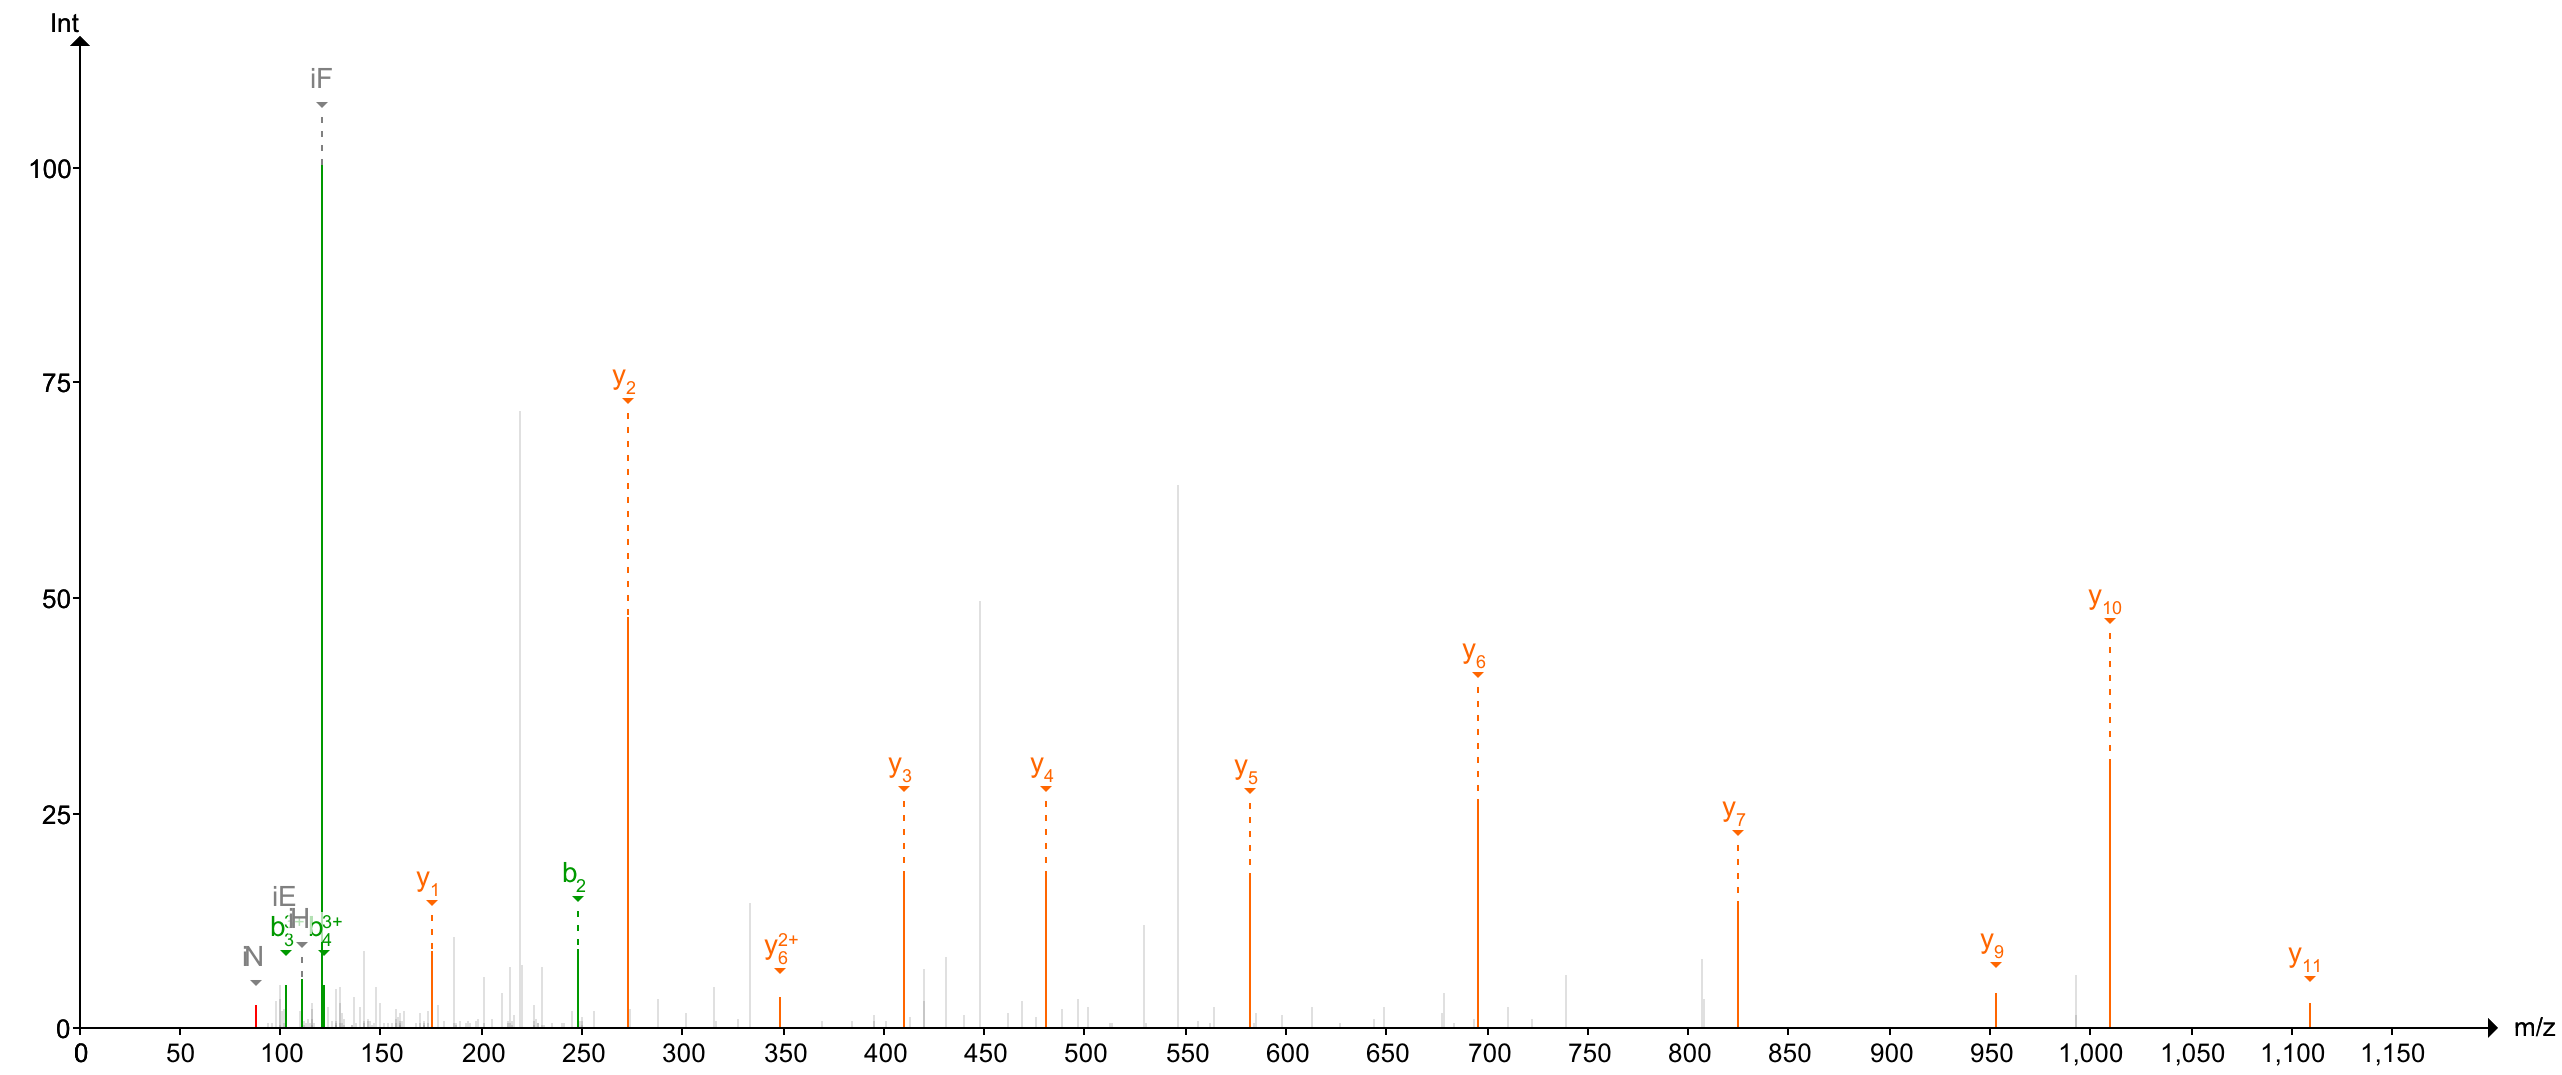

NH<sub>2</sub>-E V T S G V S P R-COOH

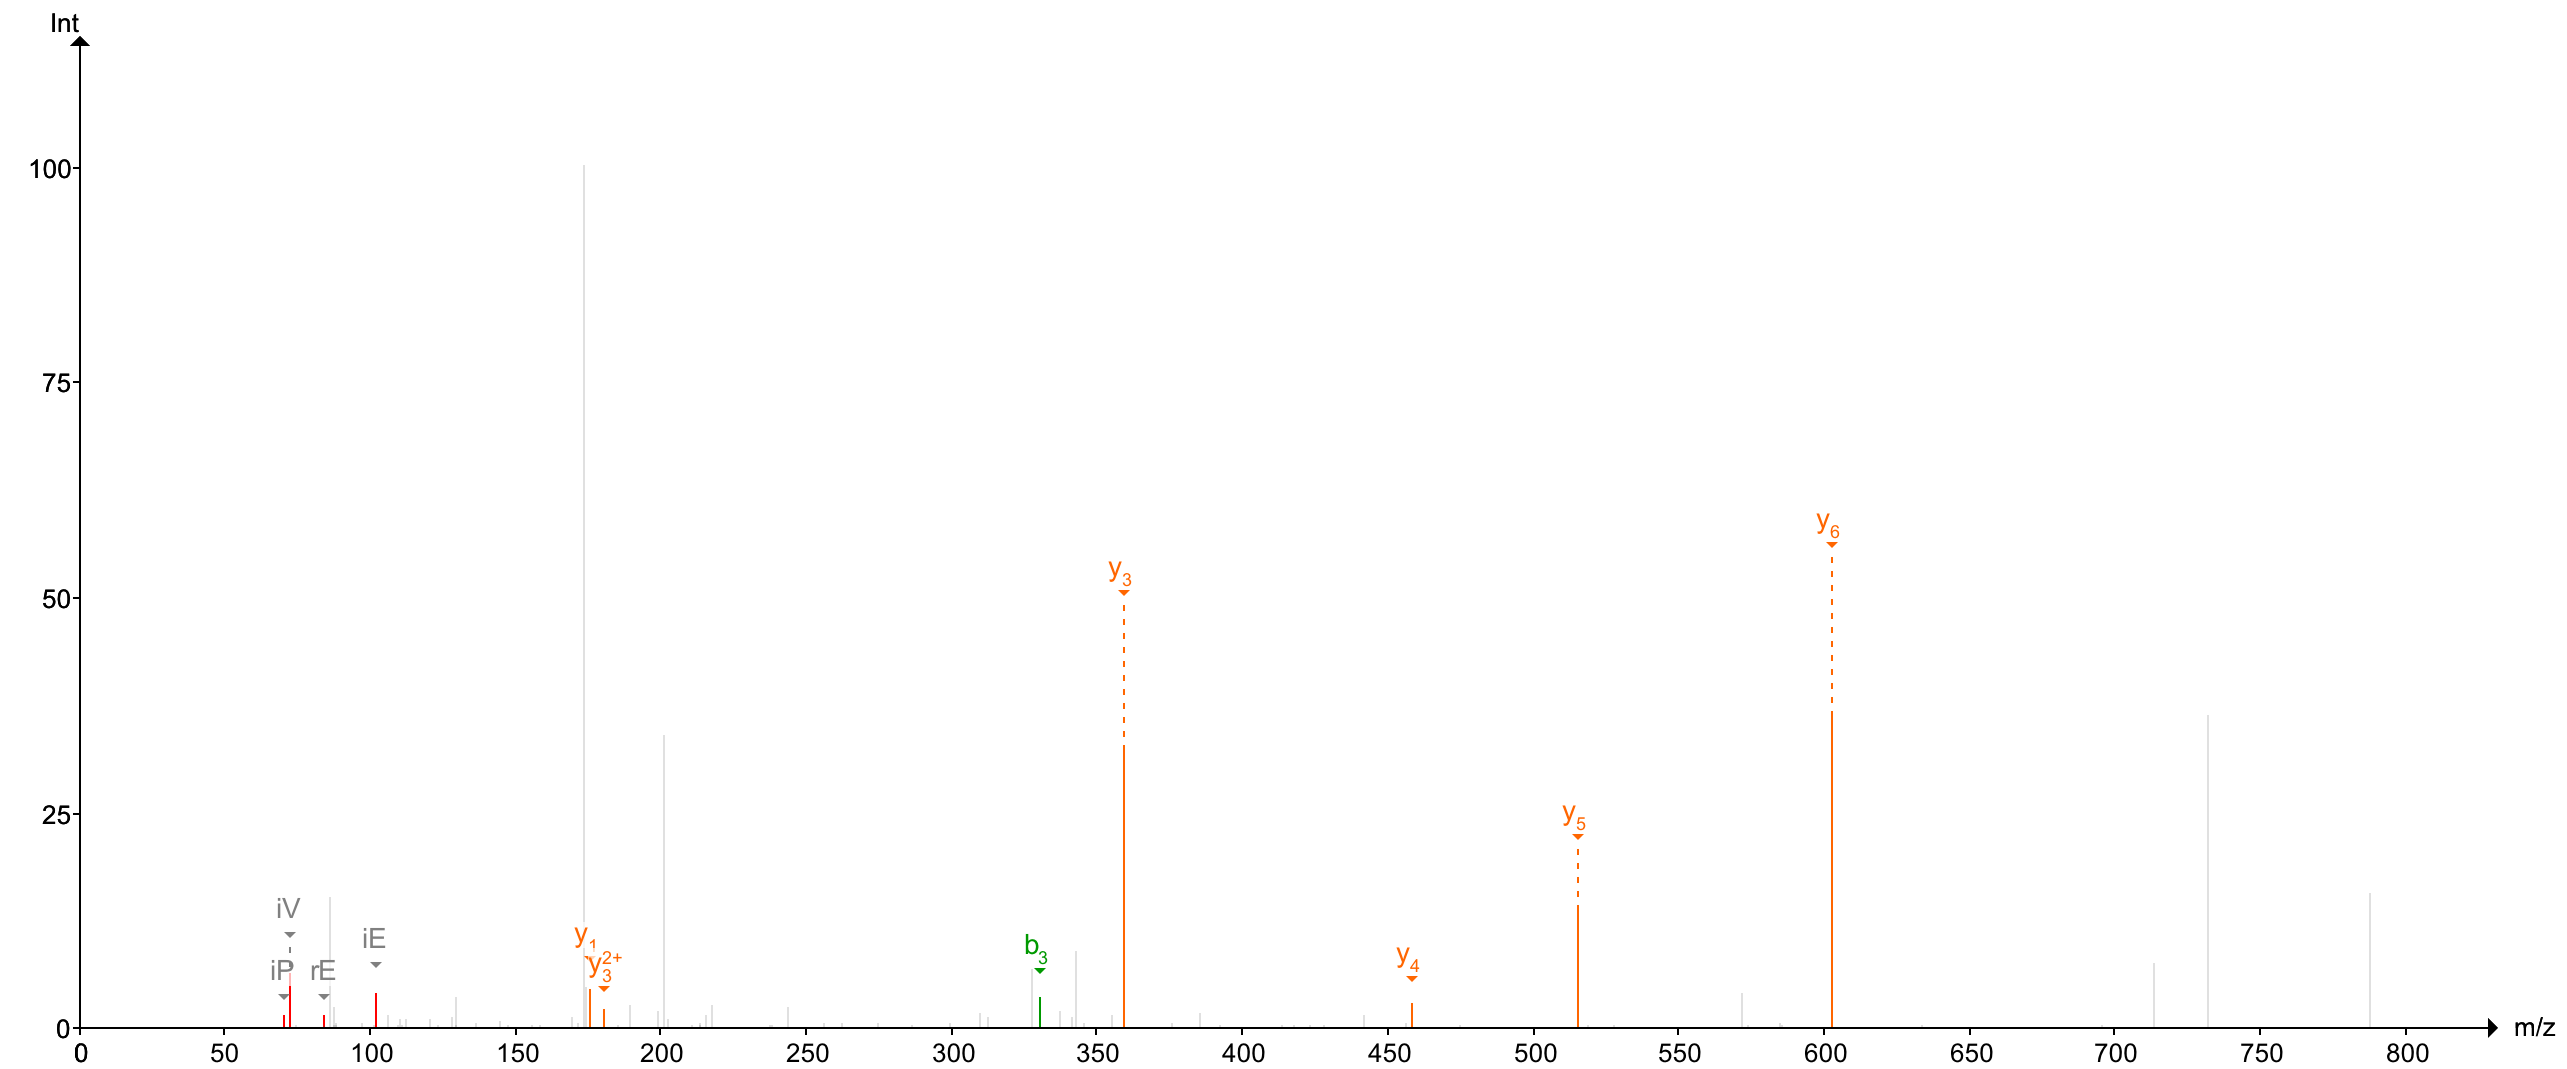

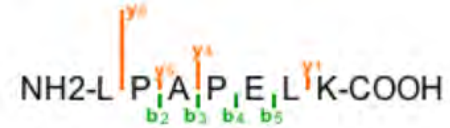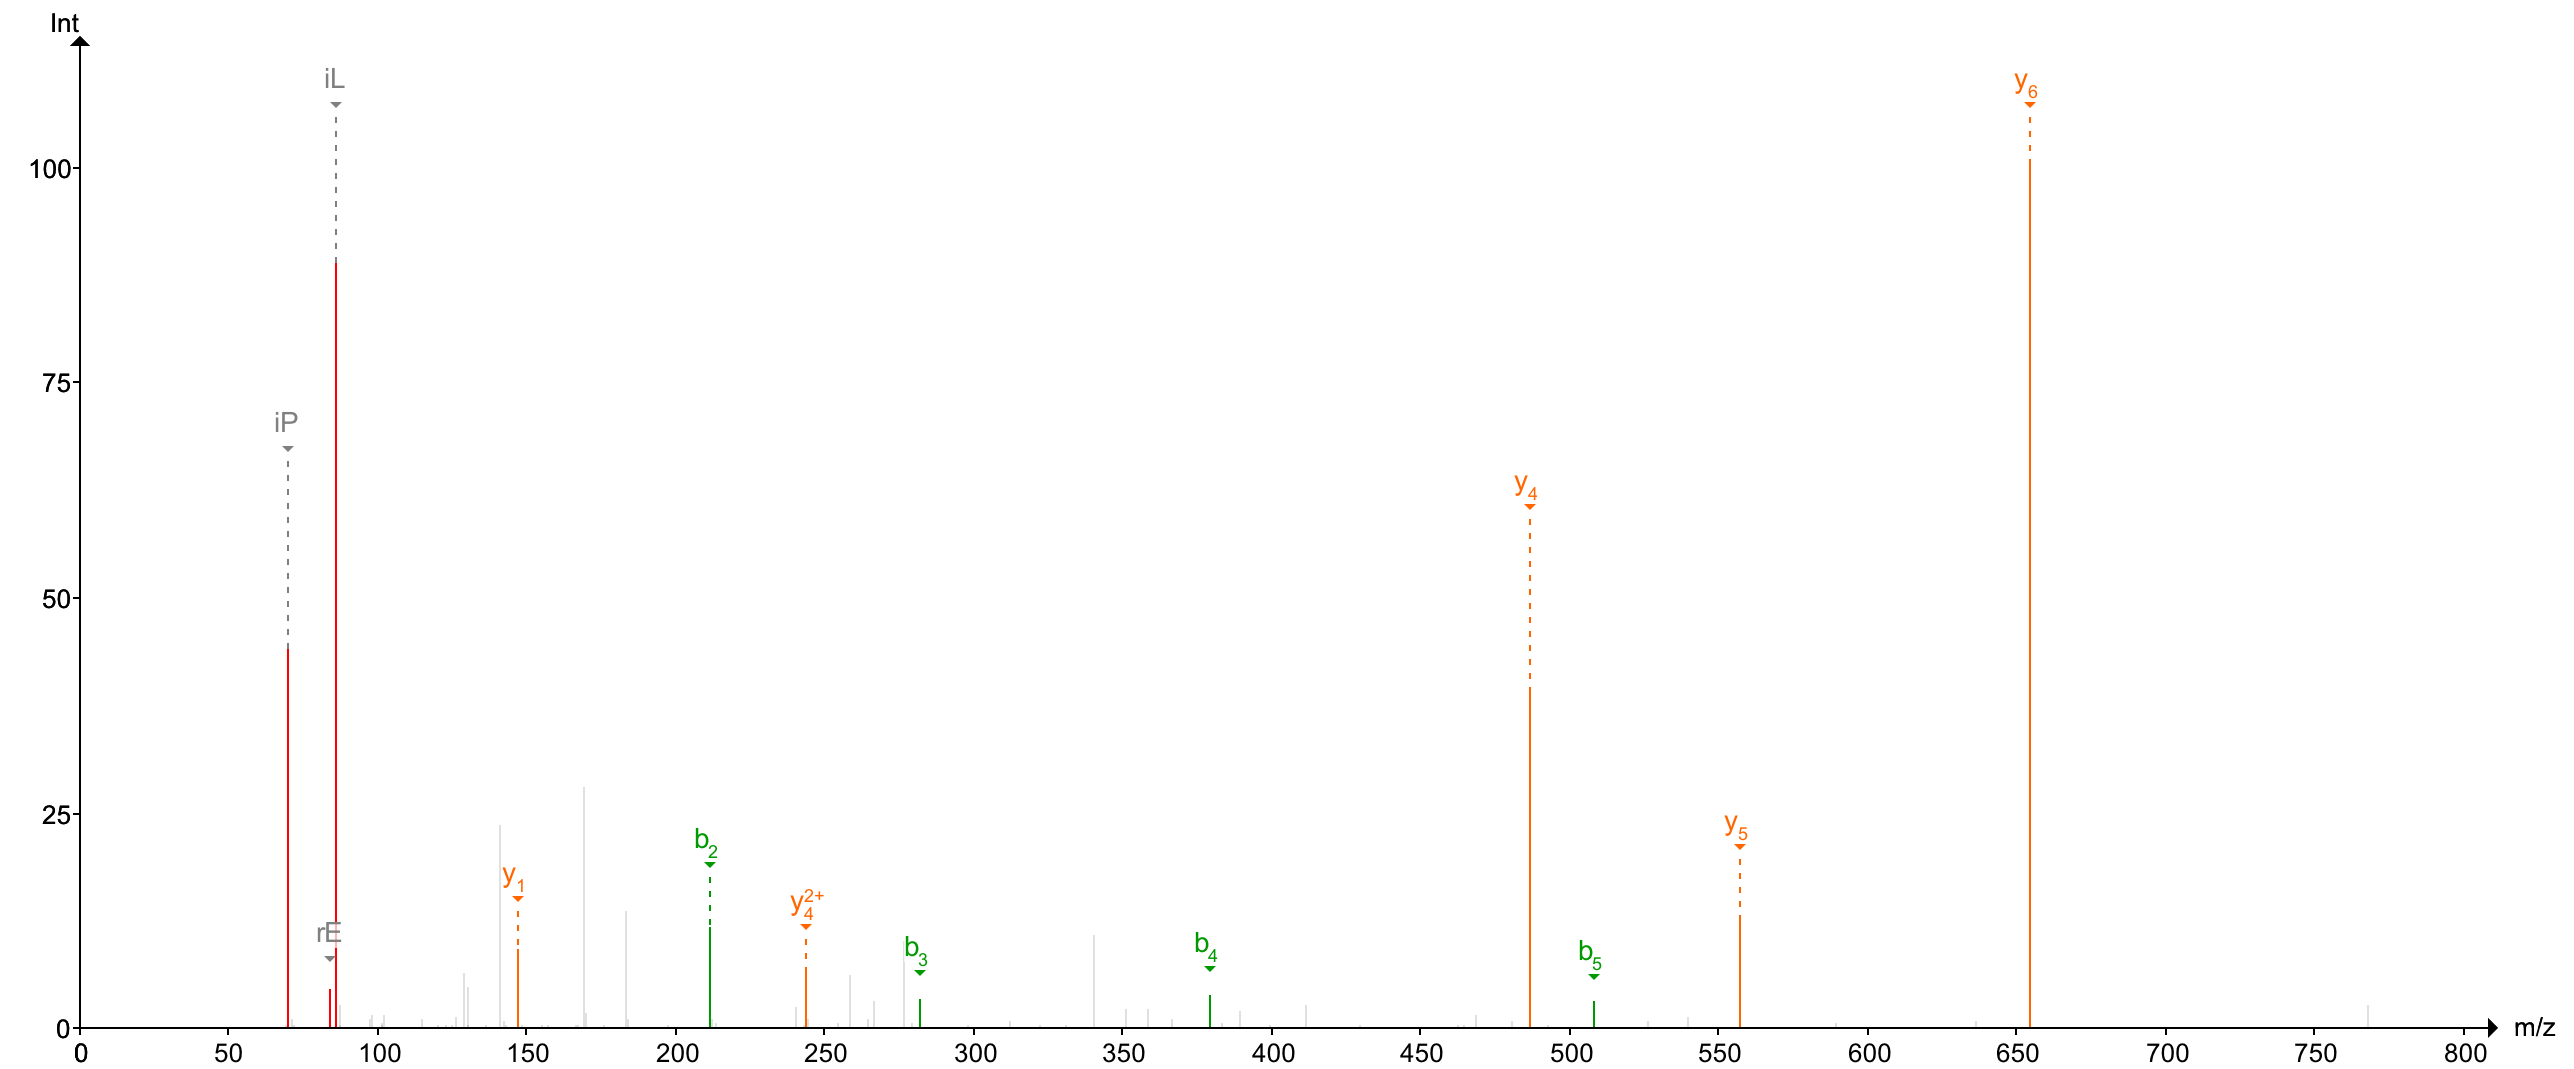

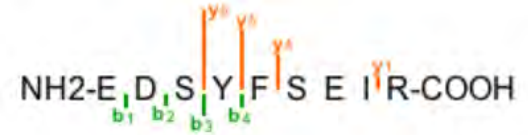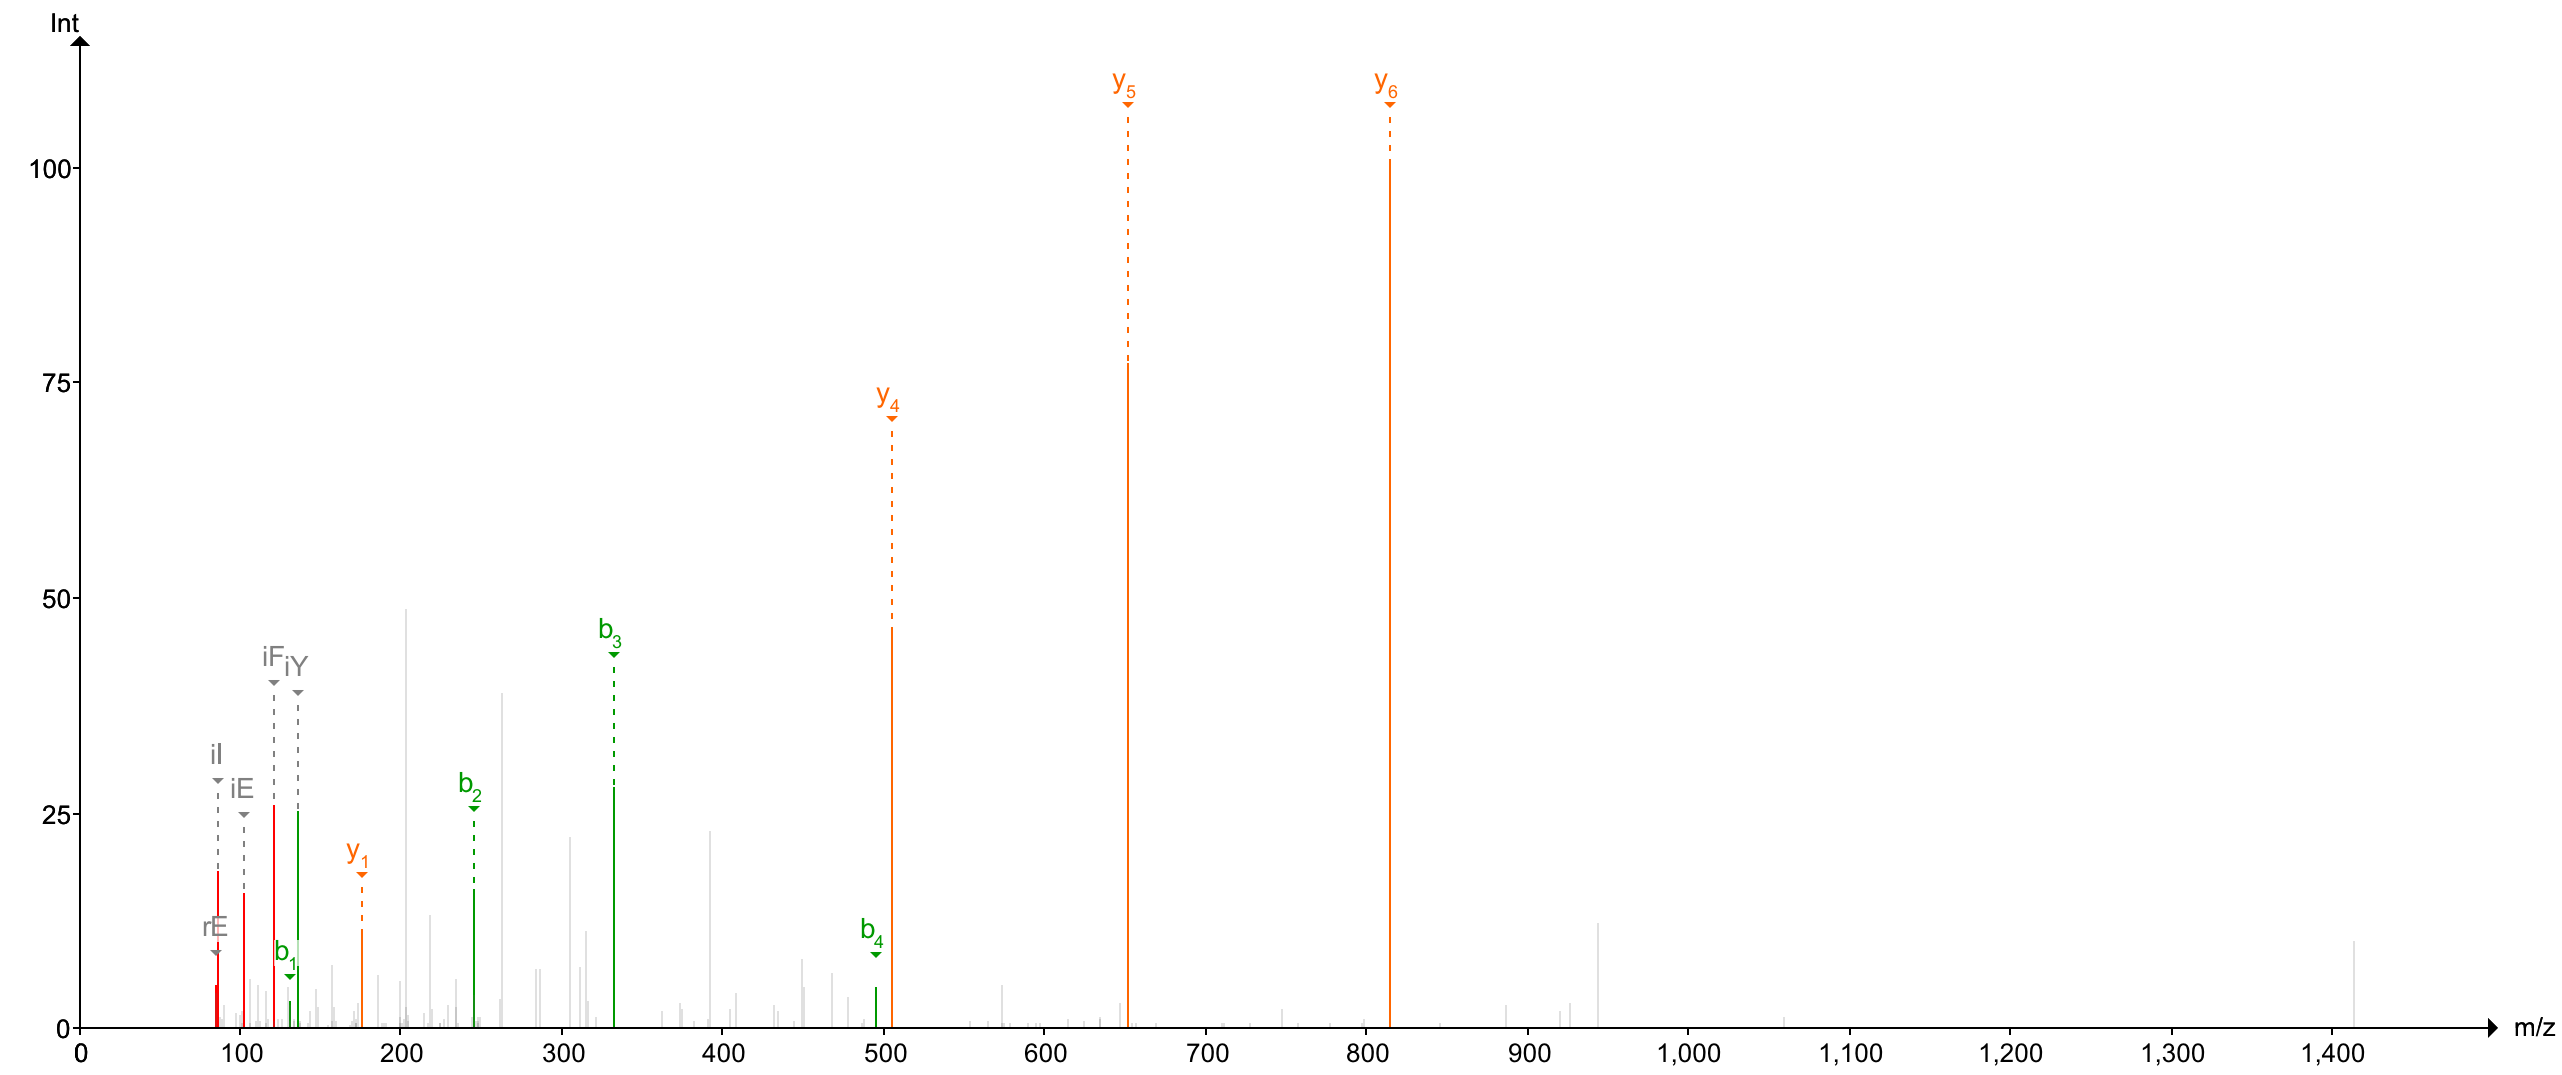



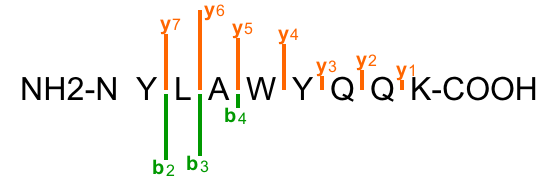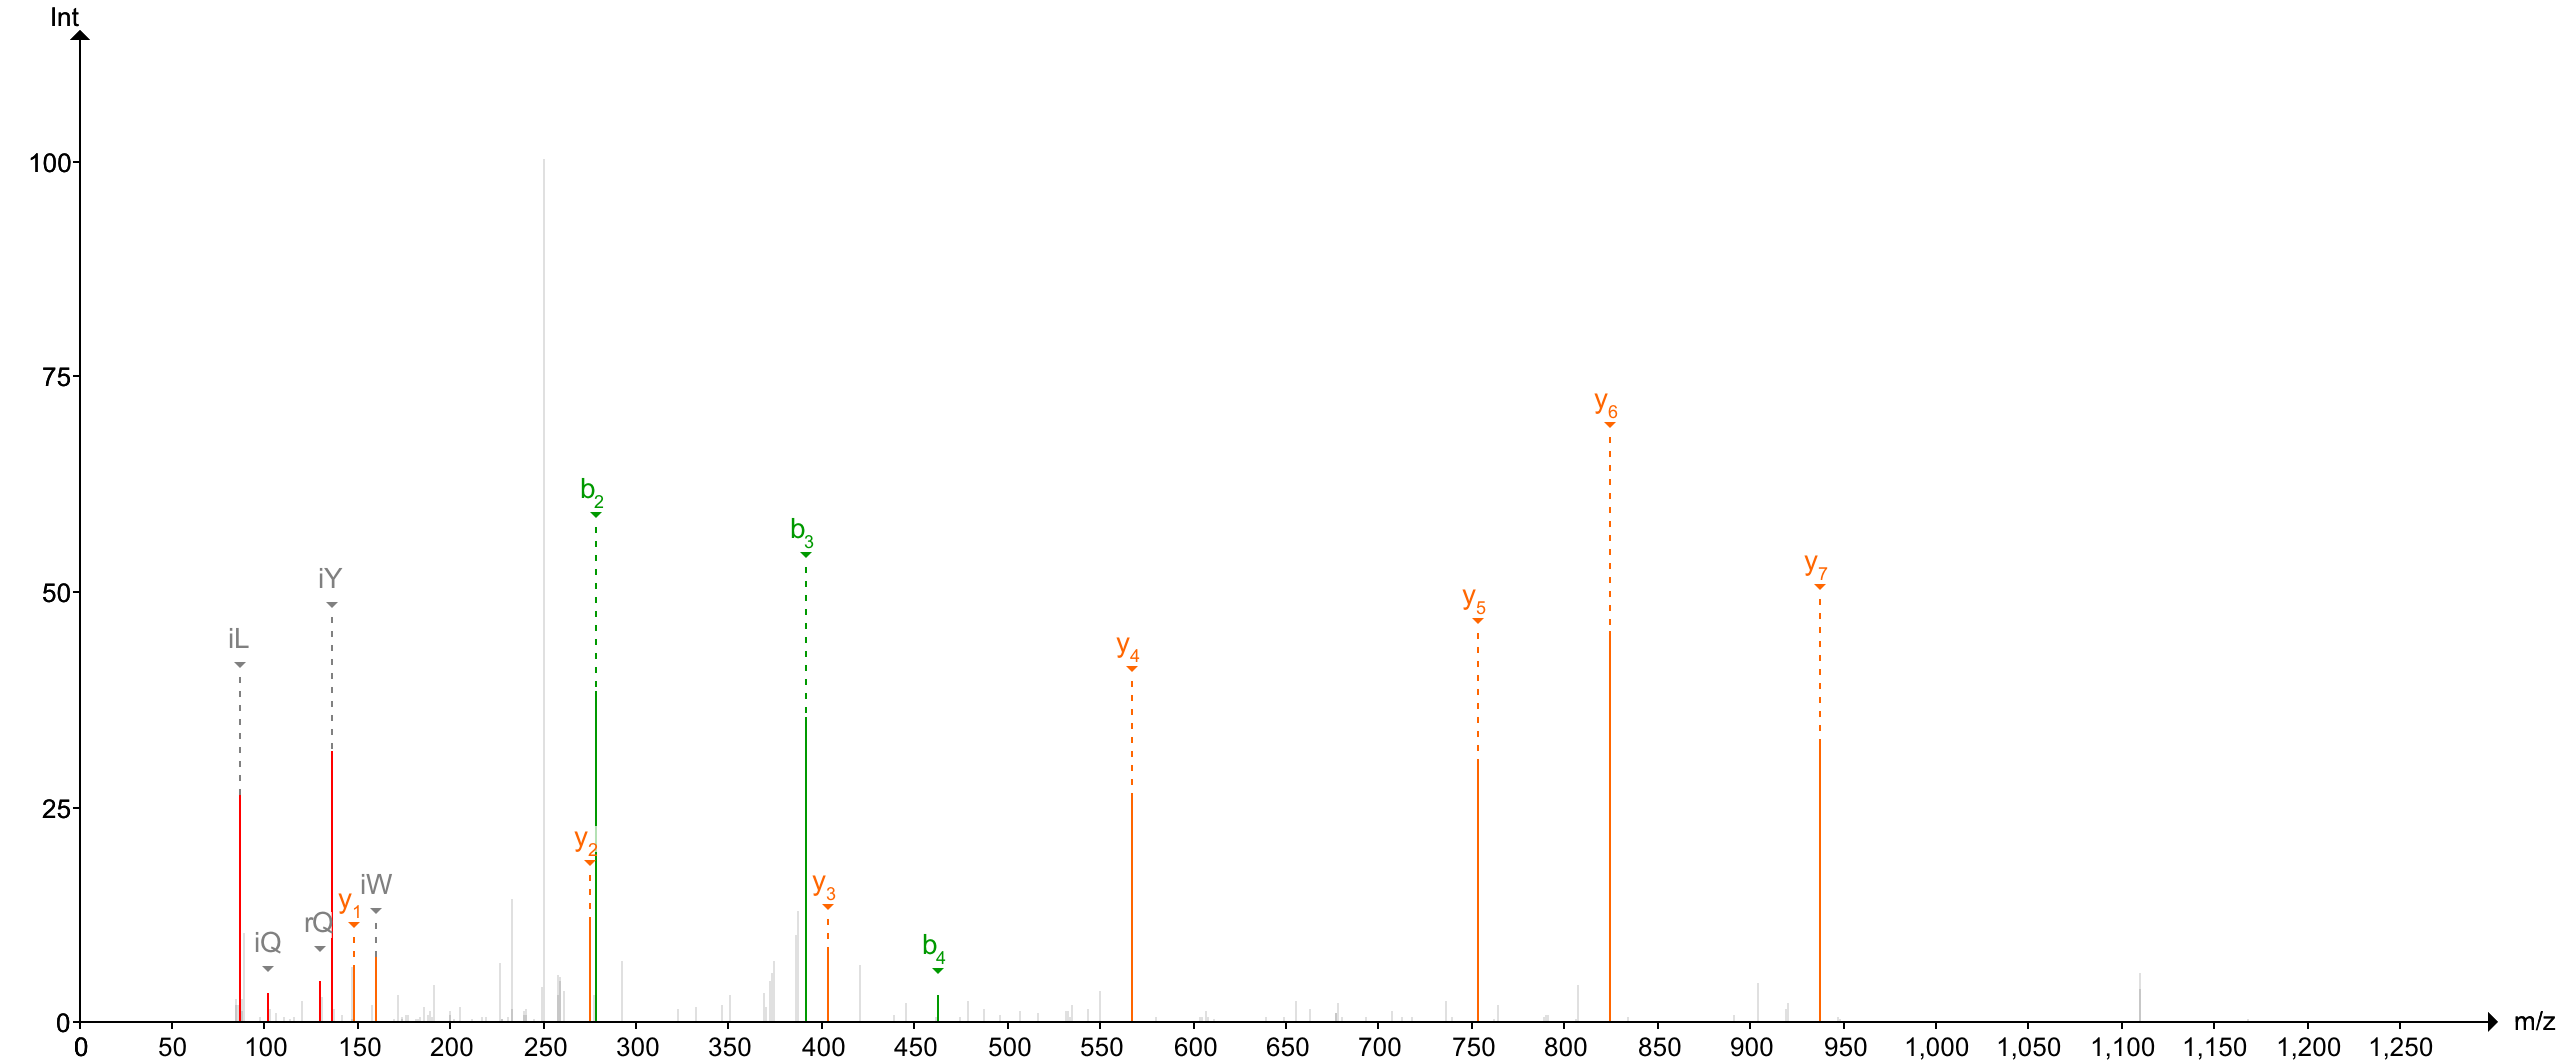

NH<sub>2</sub>-L<sup>y<sub>14</sub></sup>L<sup>y<sub>13</sub></sup>L<sup>b<sub>2</sub></sup>L<sup>b<sub>3</sub></sup>Q E M L N V S G Q<sup>y<sub>3</sub></sup>S P<sup>y<sub>1</sub></sup>R-COOH

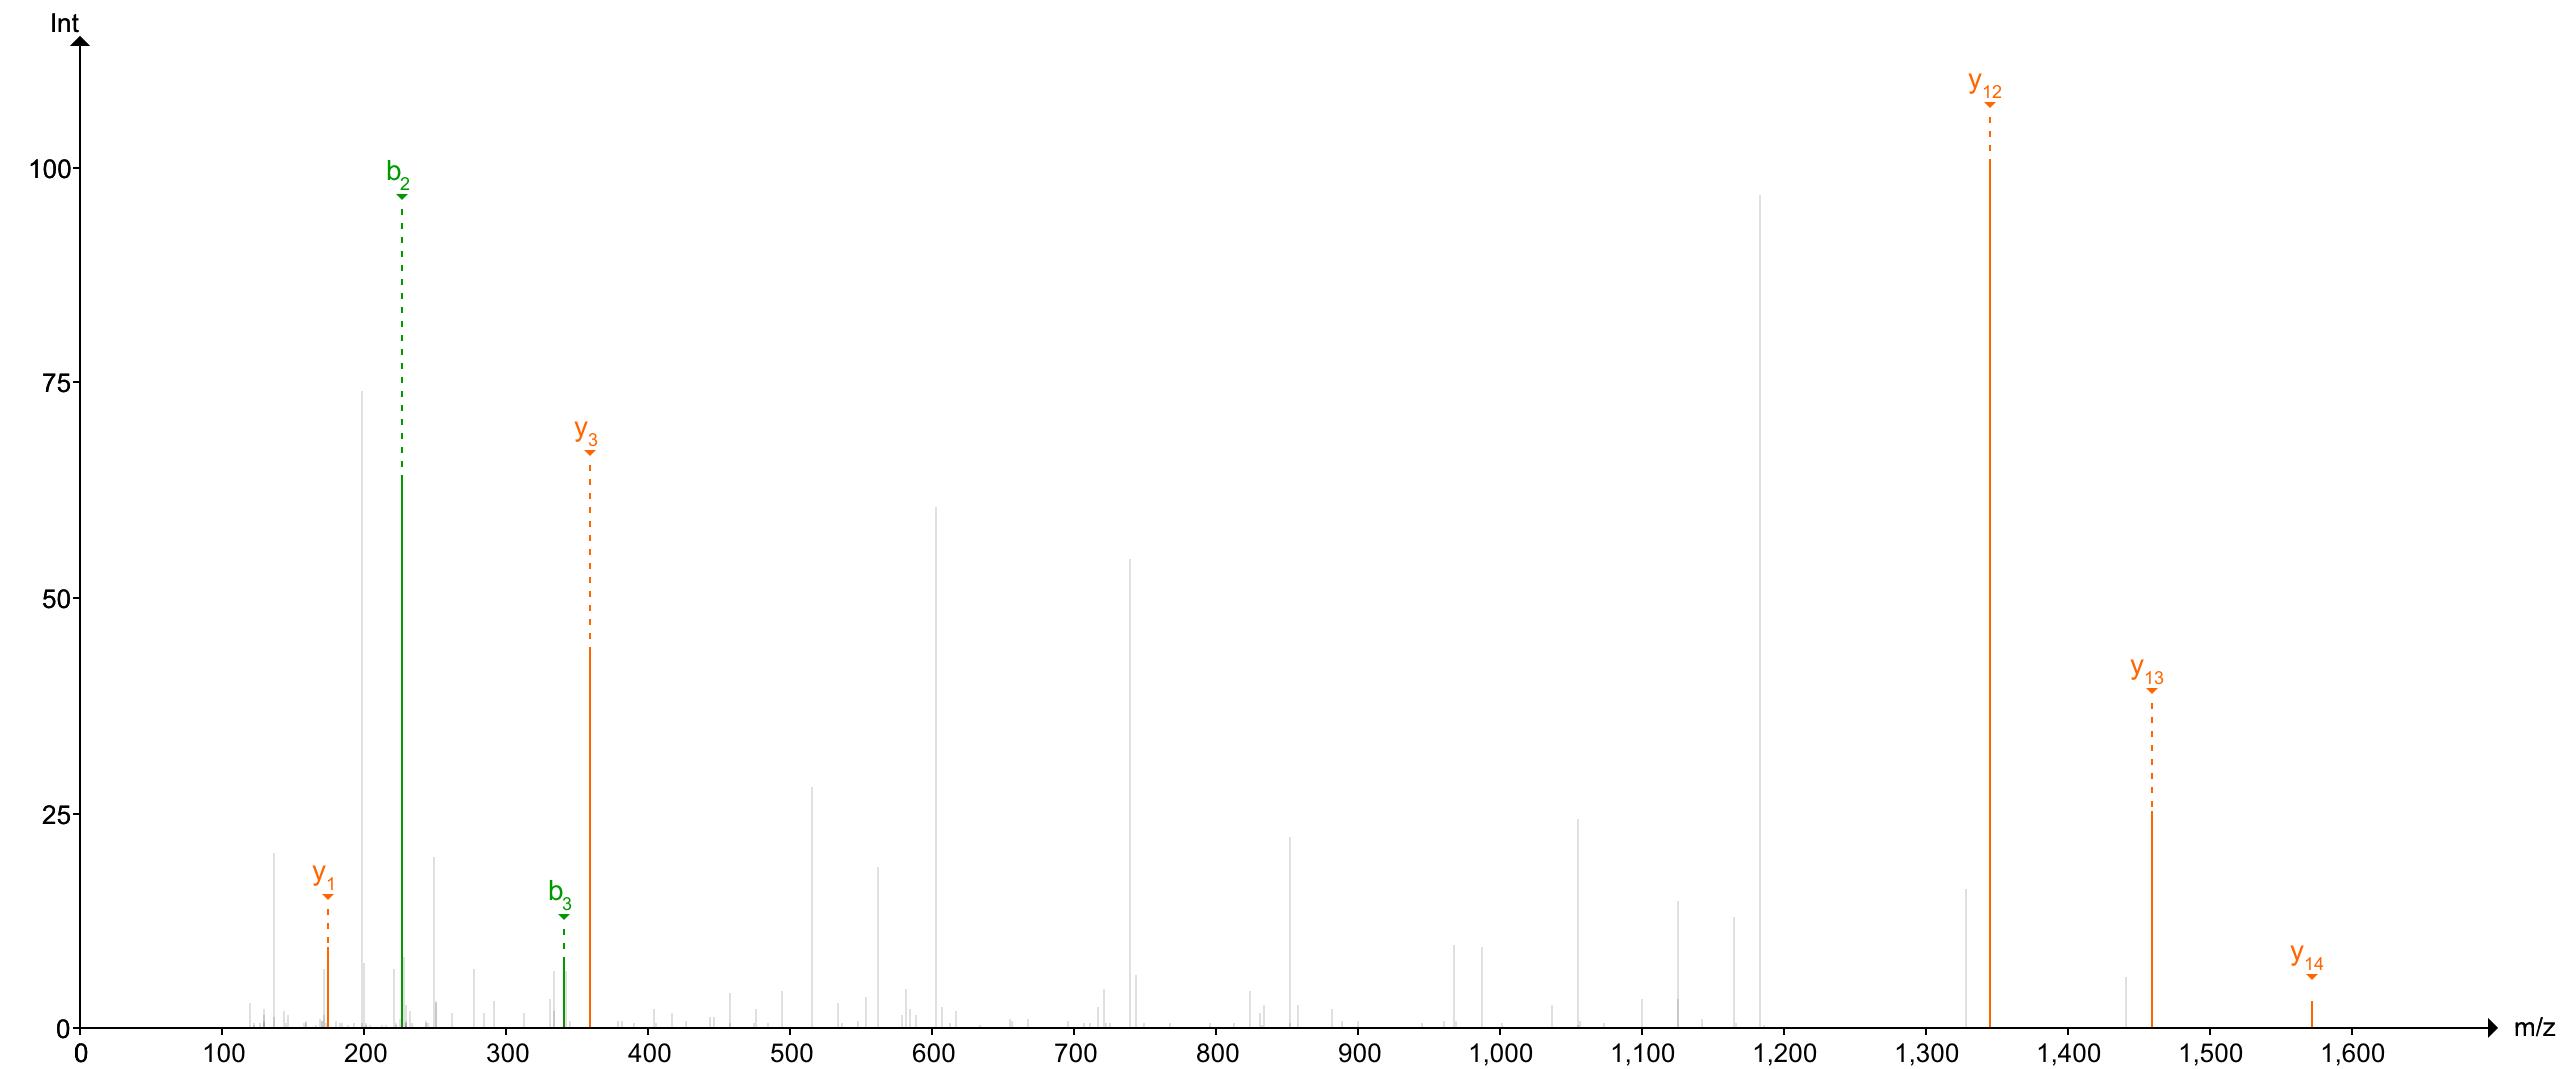

NH<sub>2</sub>-E K S L G D E E E P P A F E S T K-COOH

y<sub>15</sub>  
y<sub>14</sub>  
y<sub>13</sub>  
b<sub>2</sub>  
b<sub>3</sub>  
b<sub>4</sub>  
b<sub>5</sub>  
b<sub>6</sub>

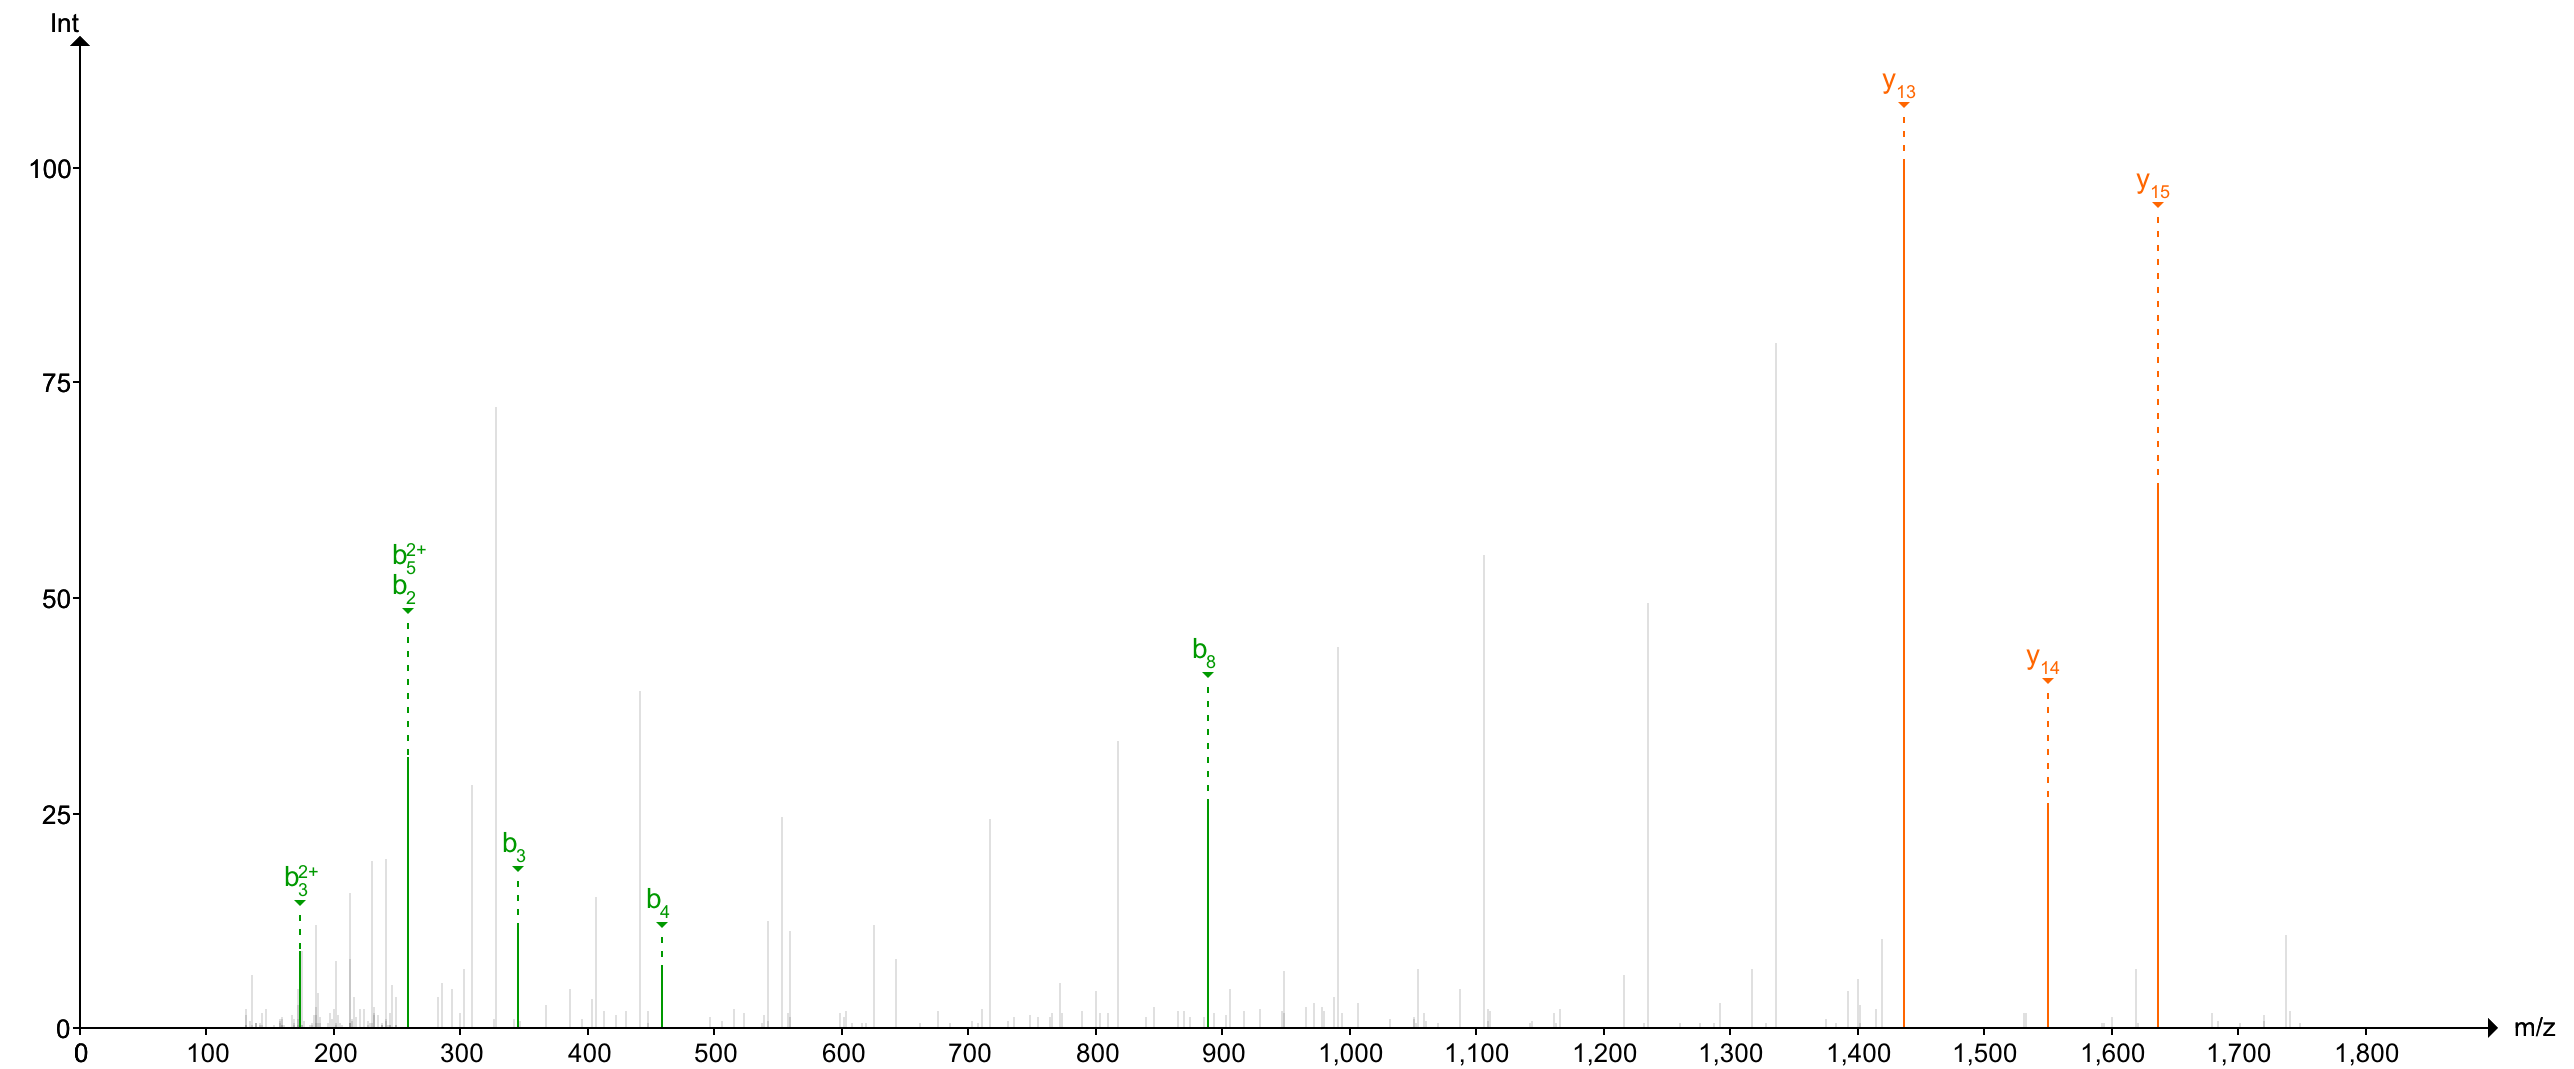

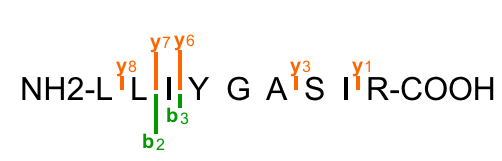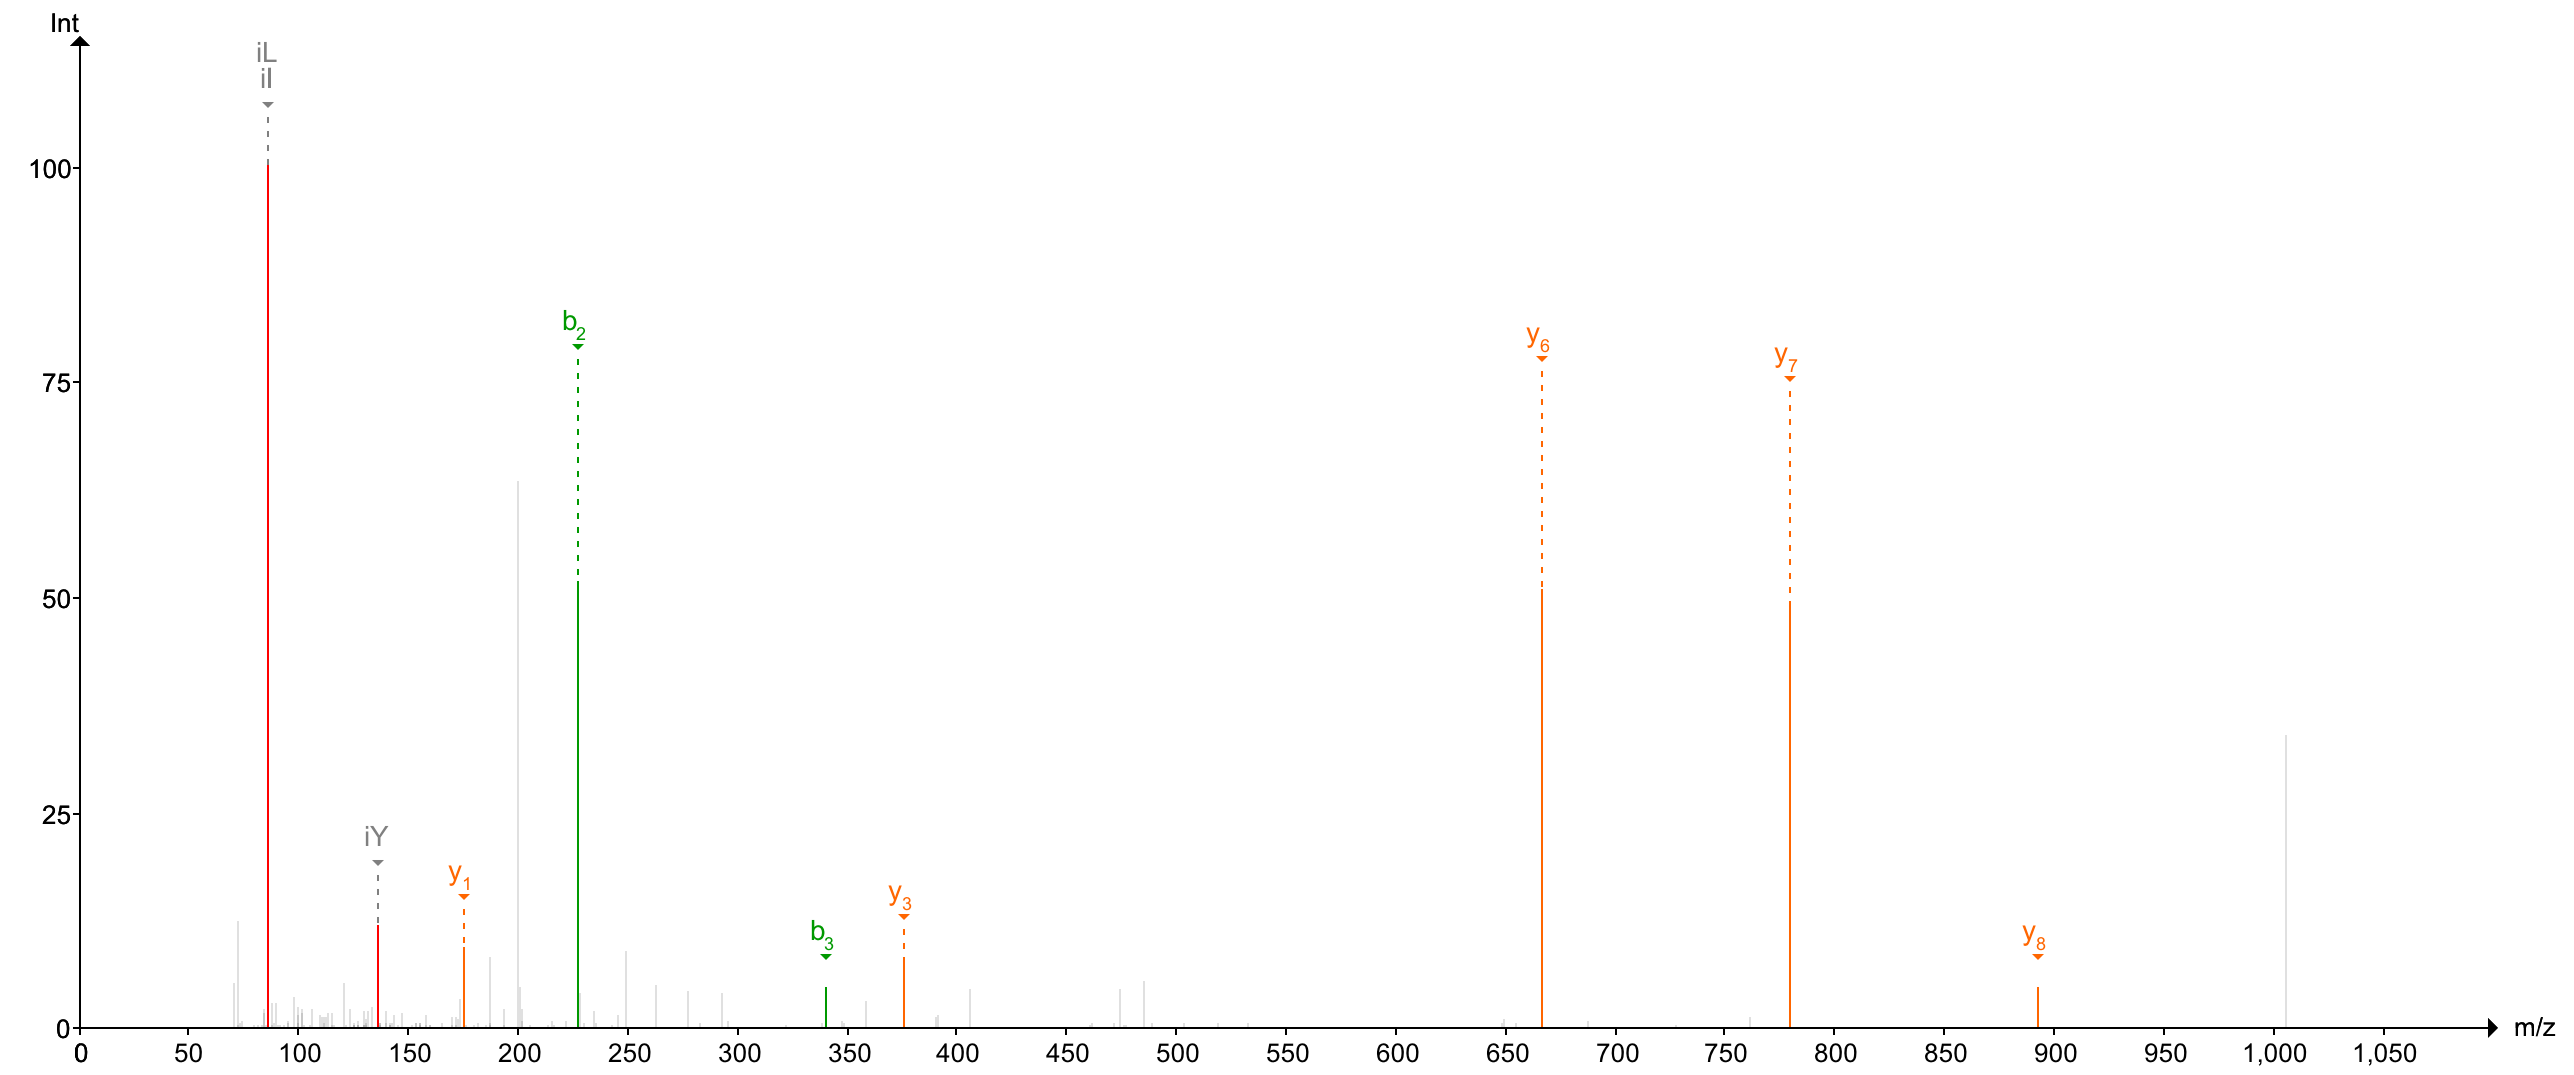

NH<sub>2</sub>-L L I Y S A S S L E N G V P S R-COOH

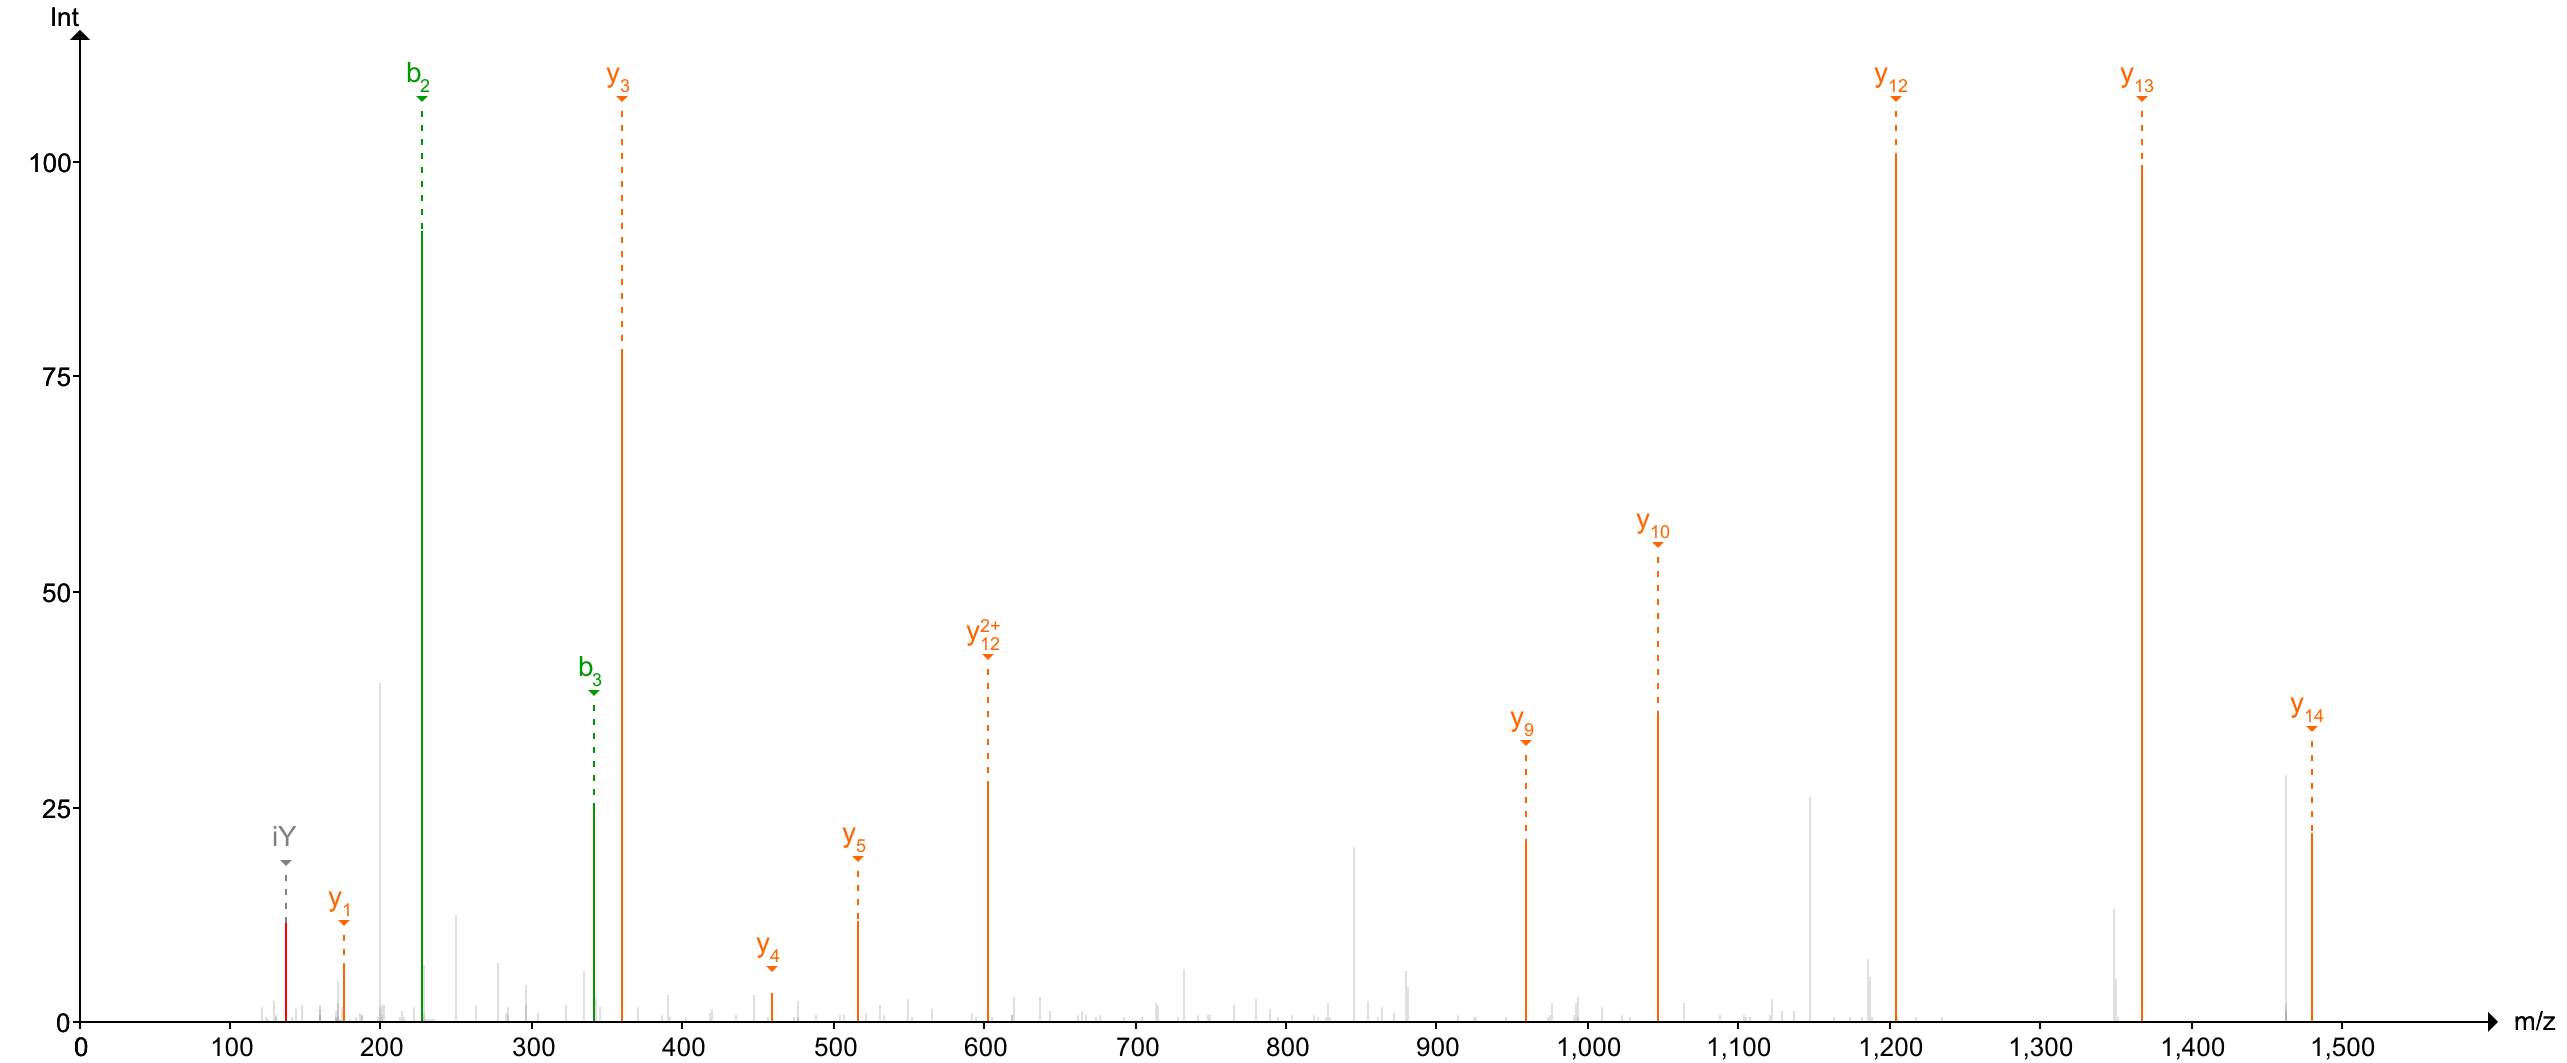

NH<sub>2</sub>-L L I Y D A S N L E T G V P S R-COOH

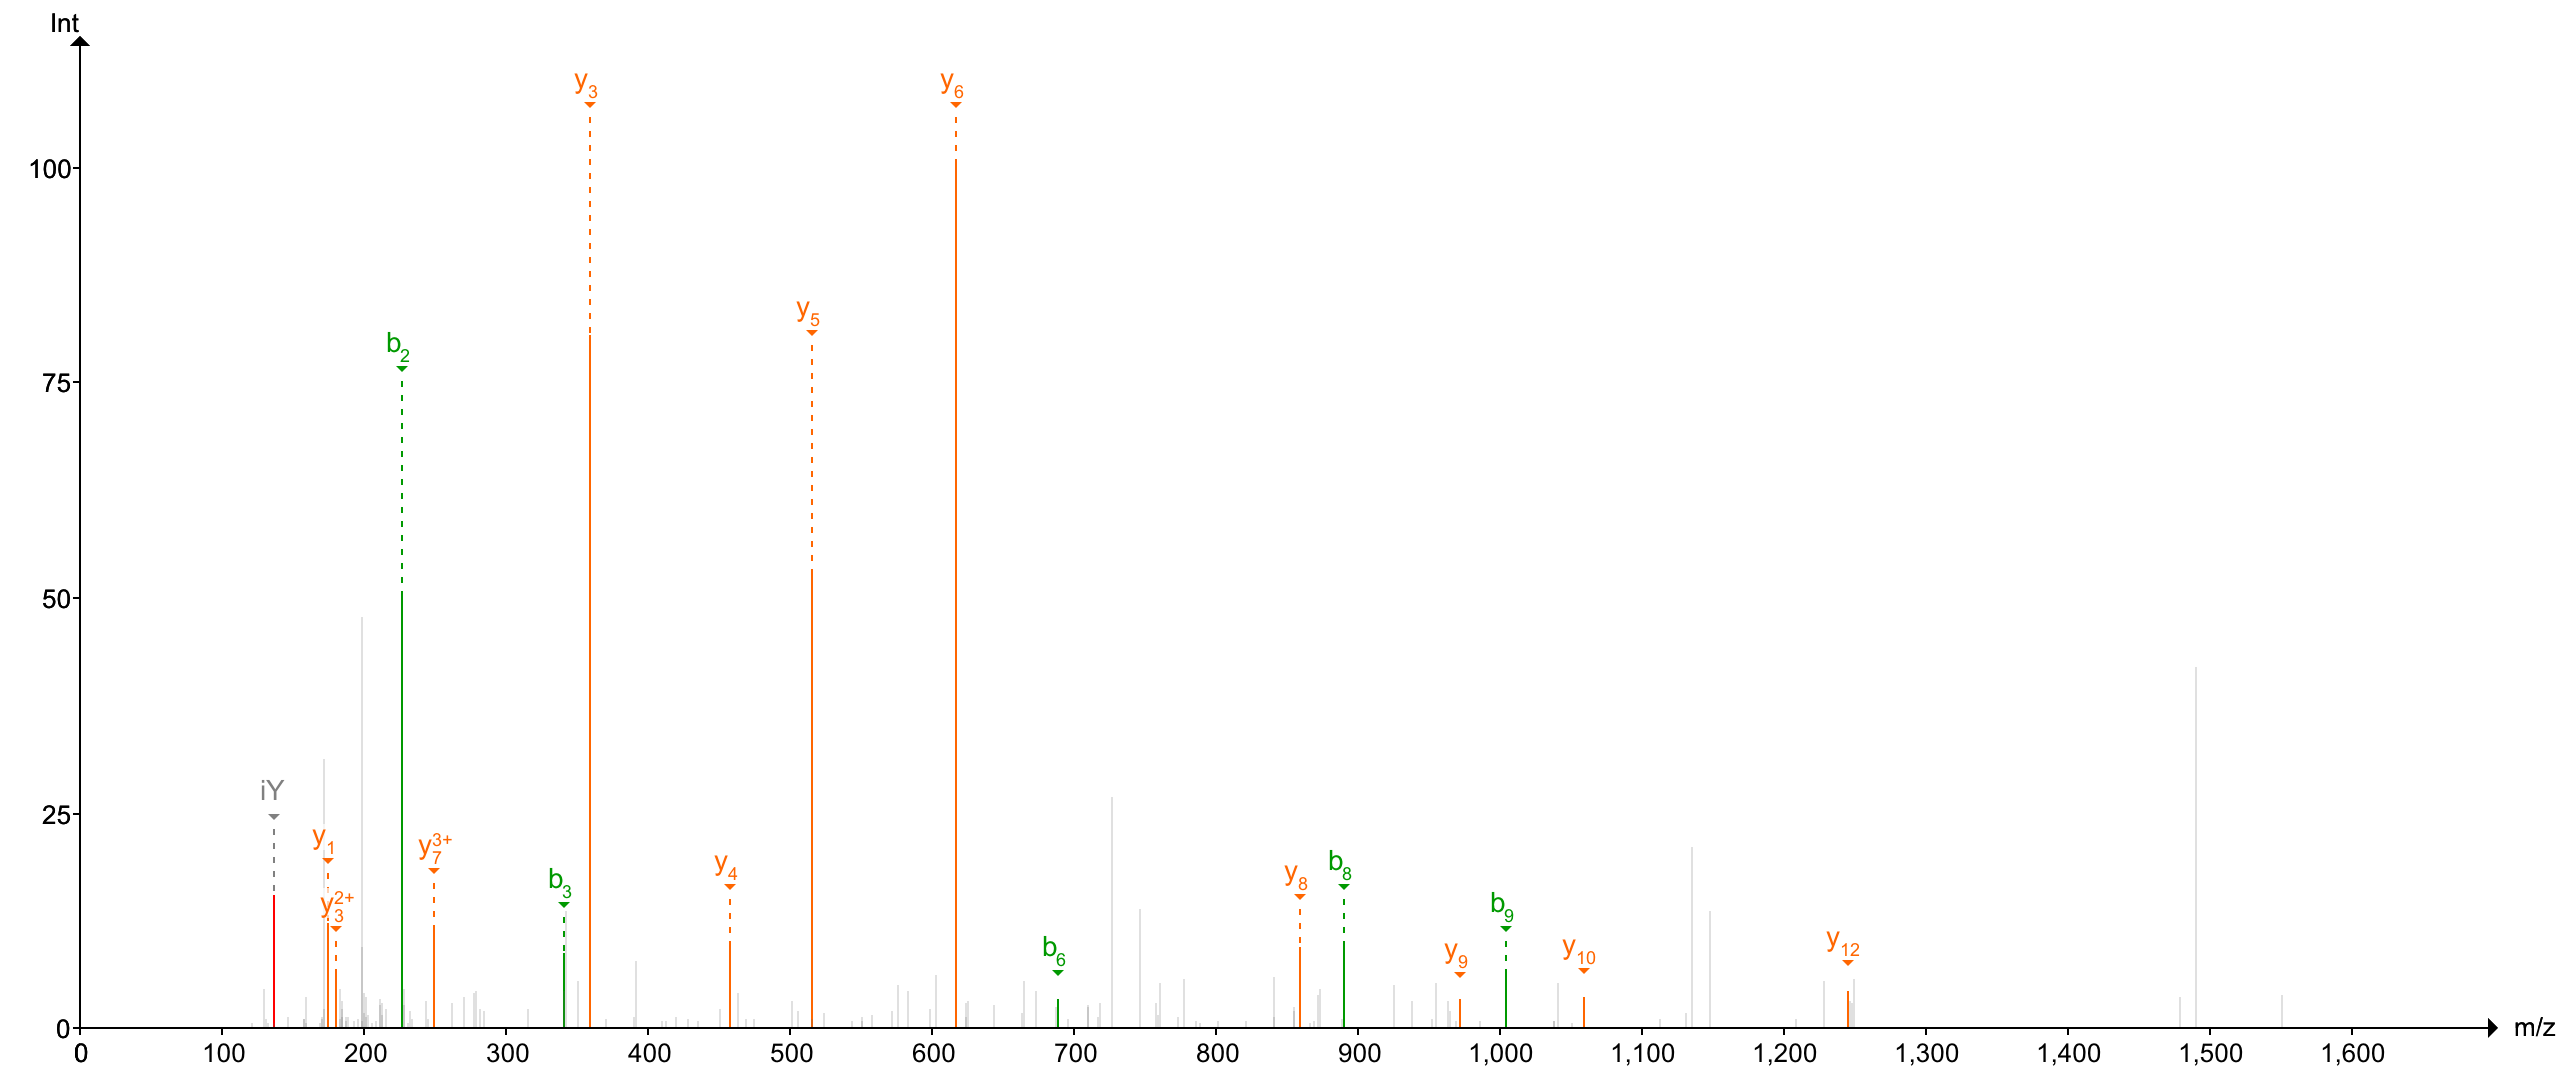

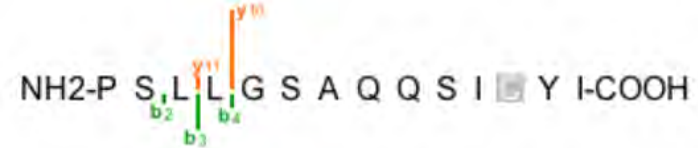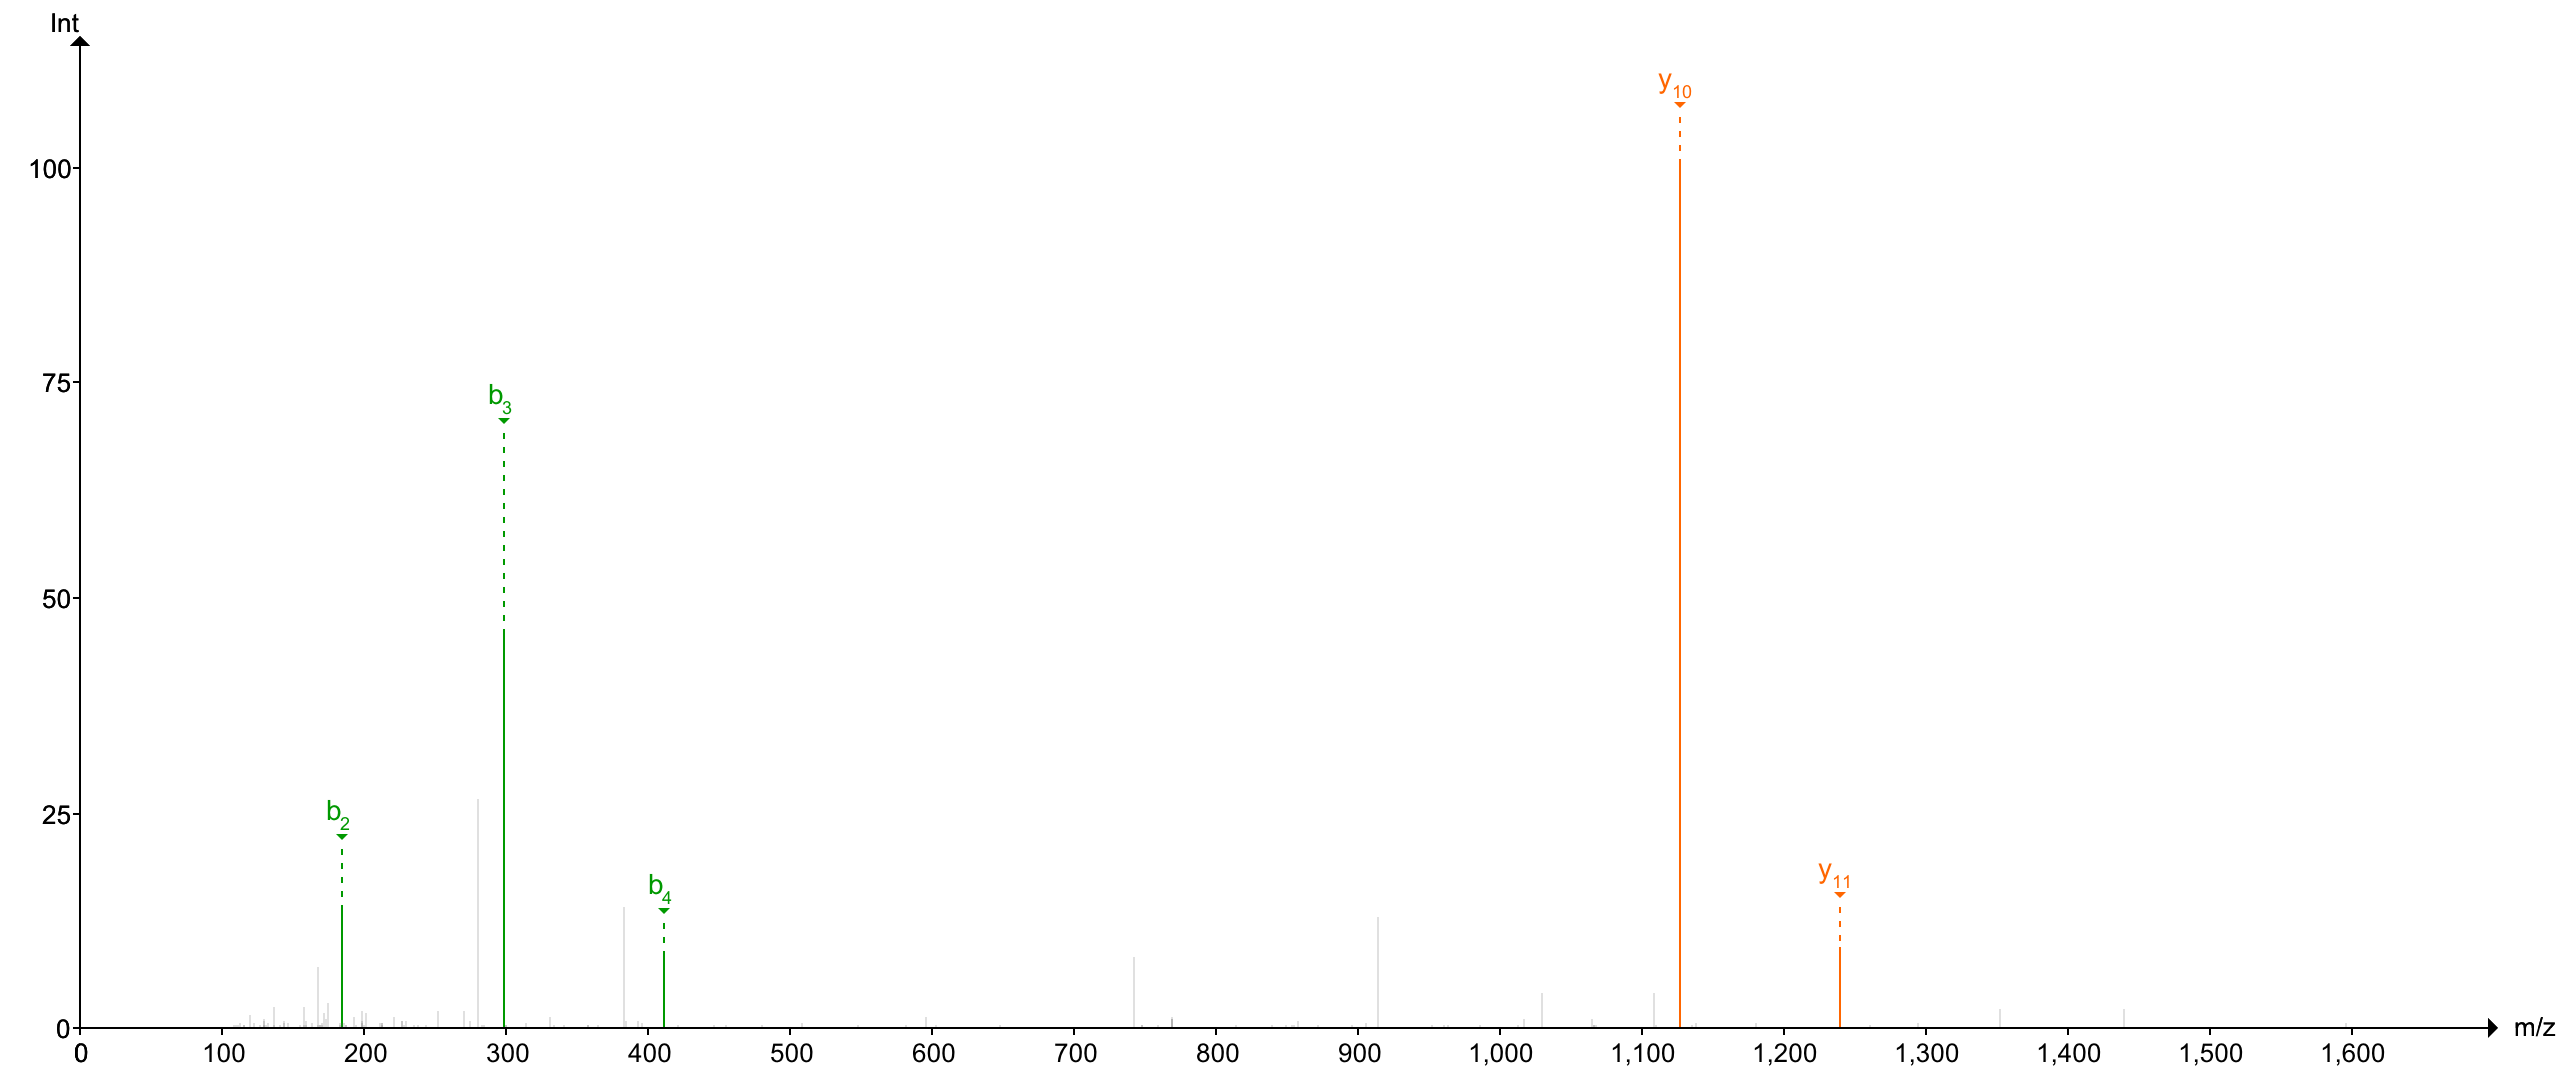

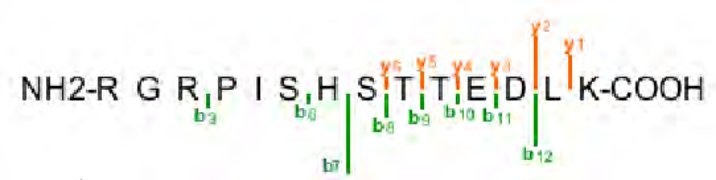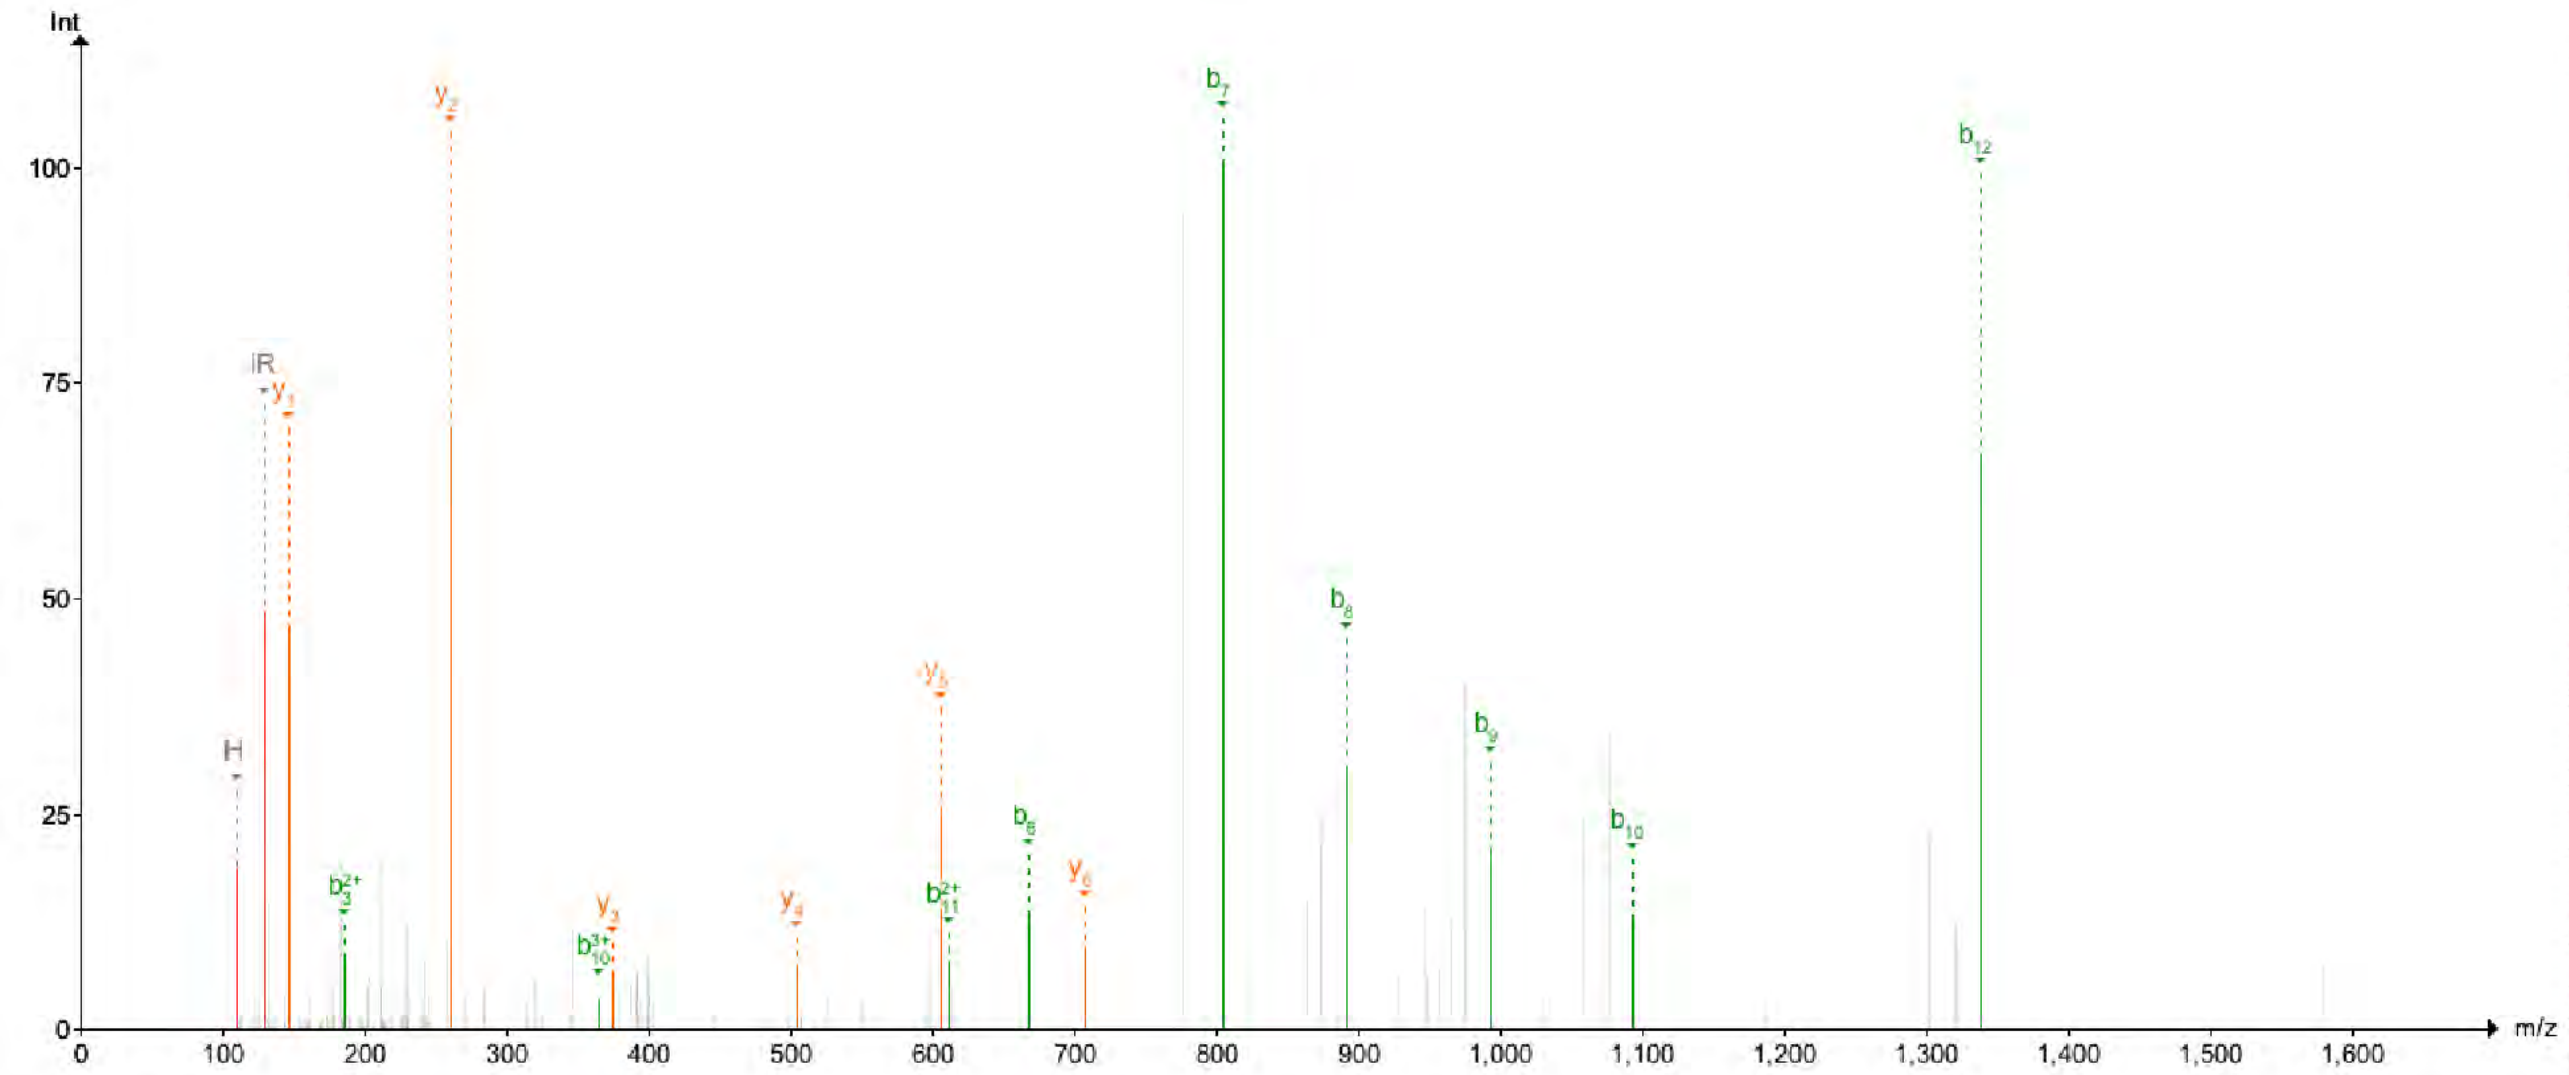



NH<sub>2</sub>-V Q A Q A E Q G Q Q E L K-COOH

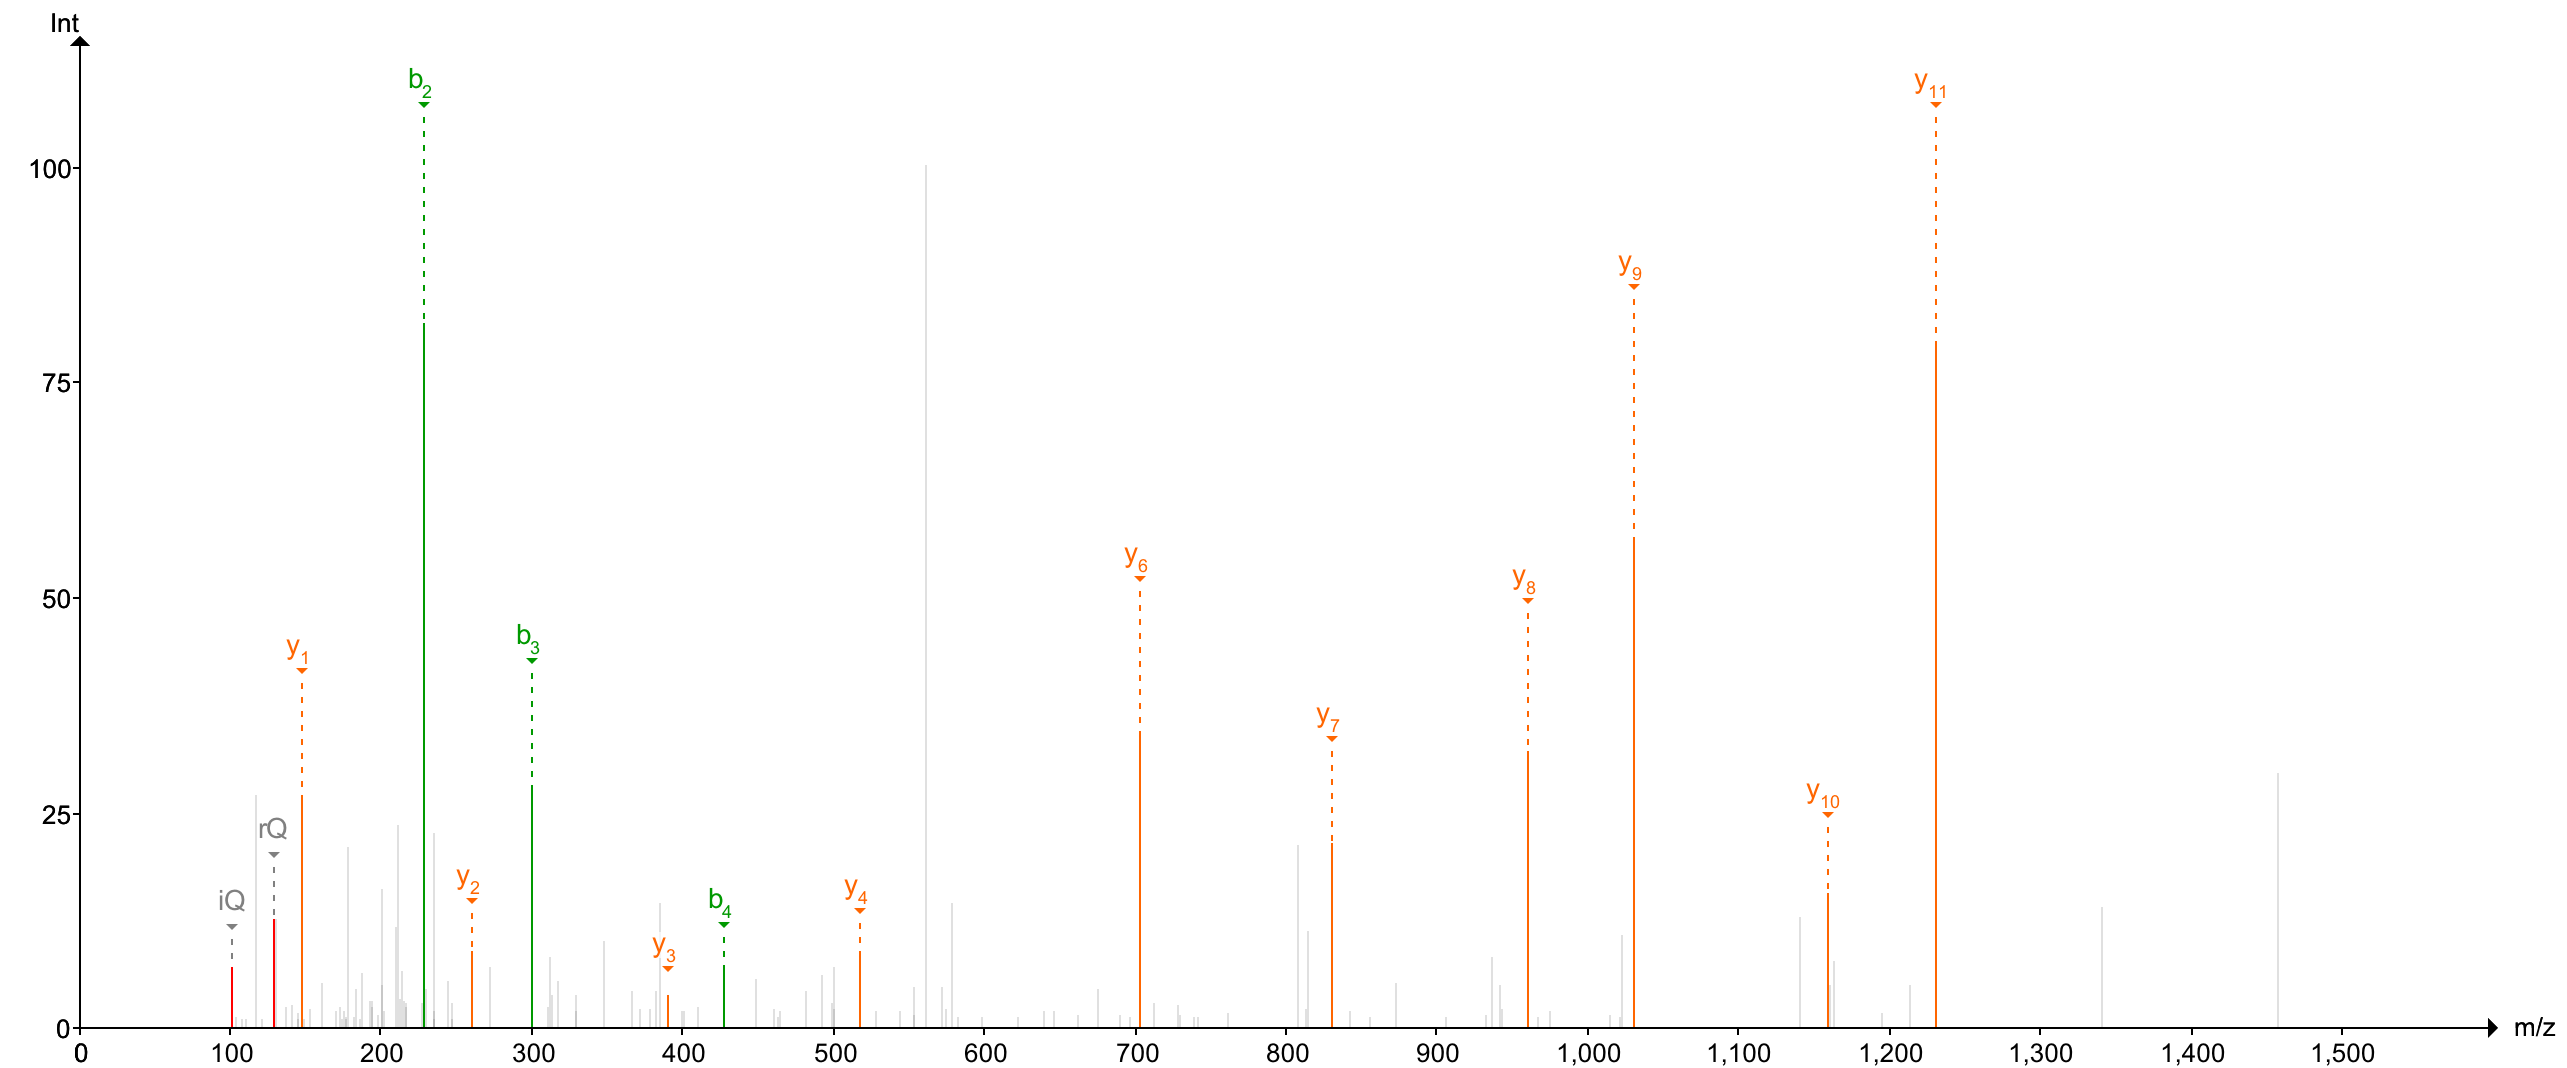

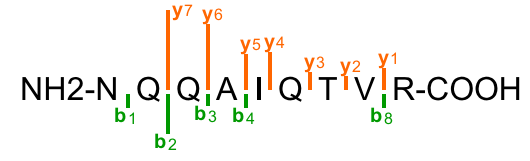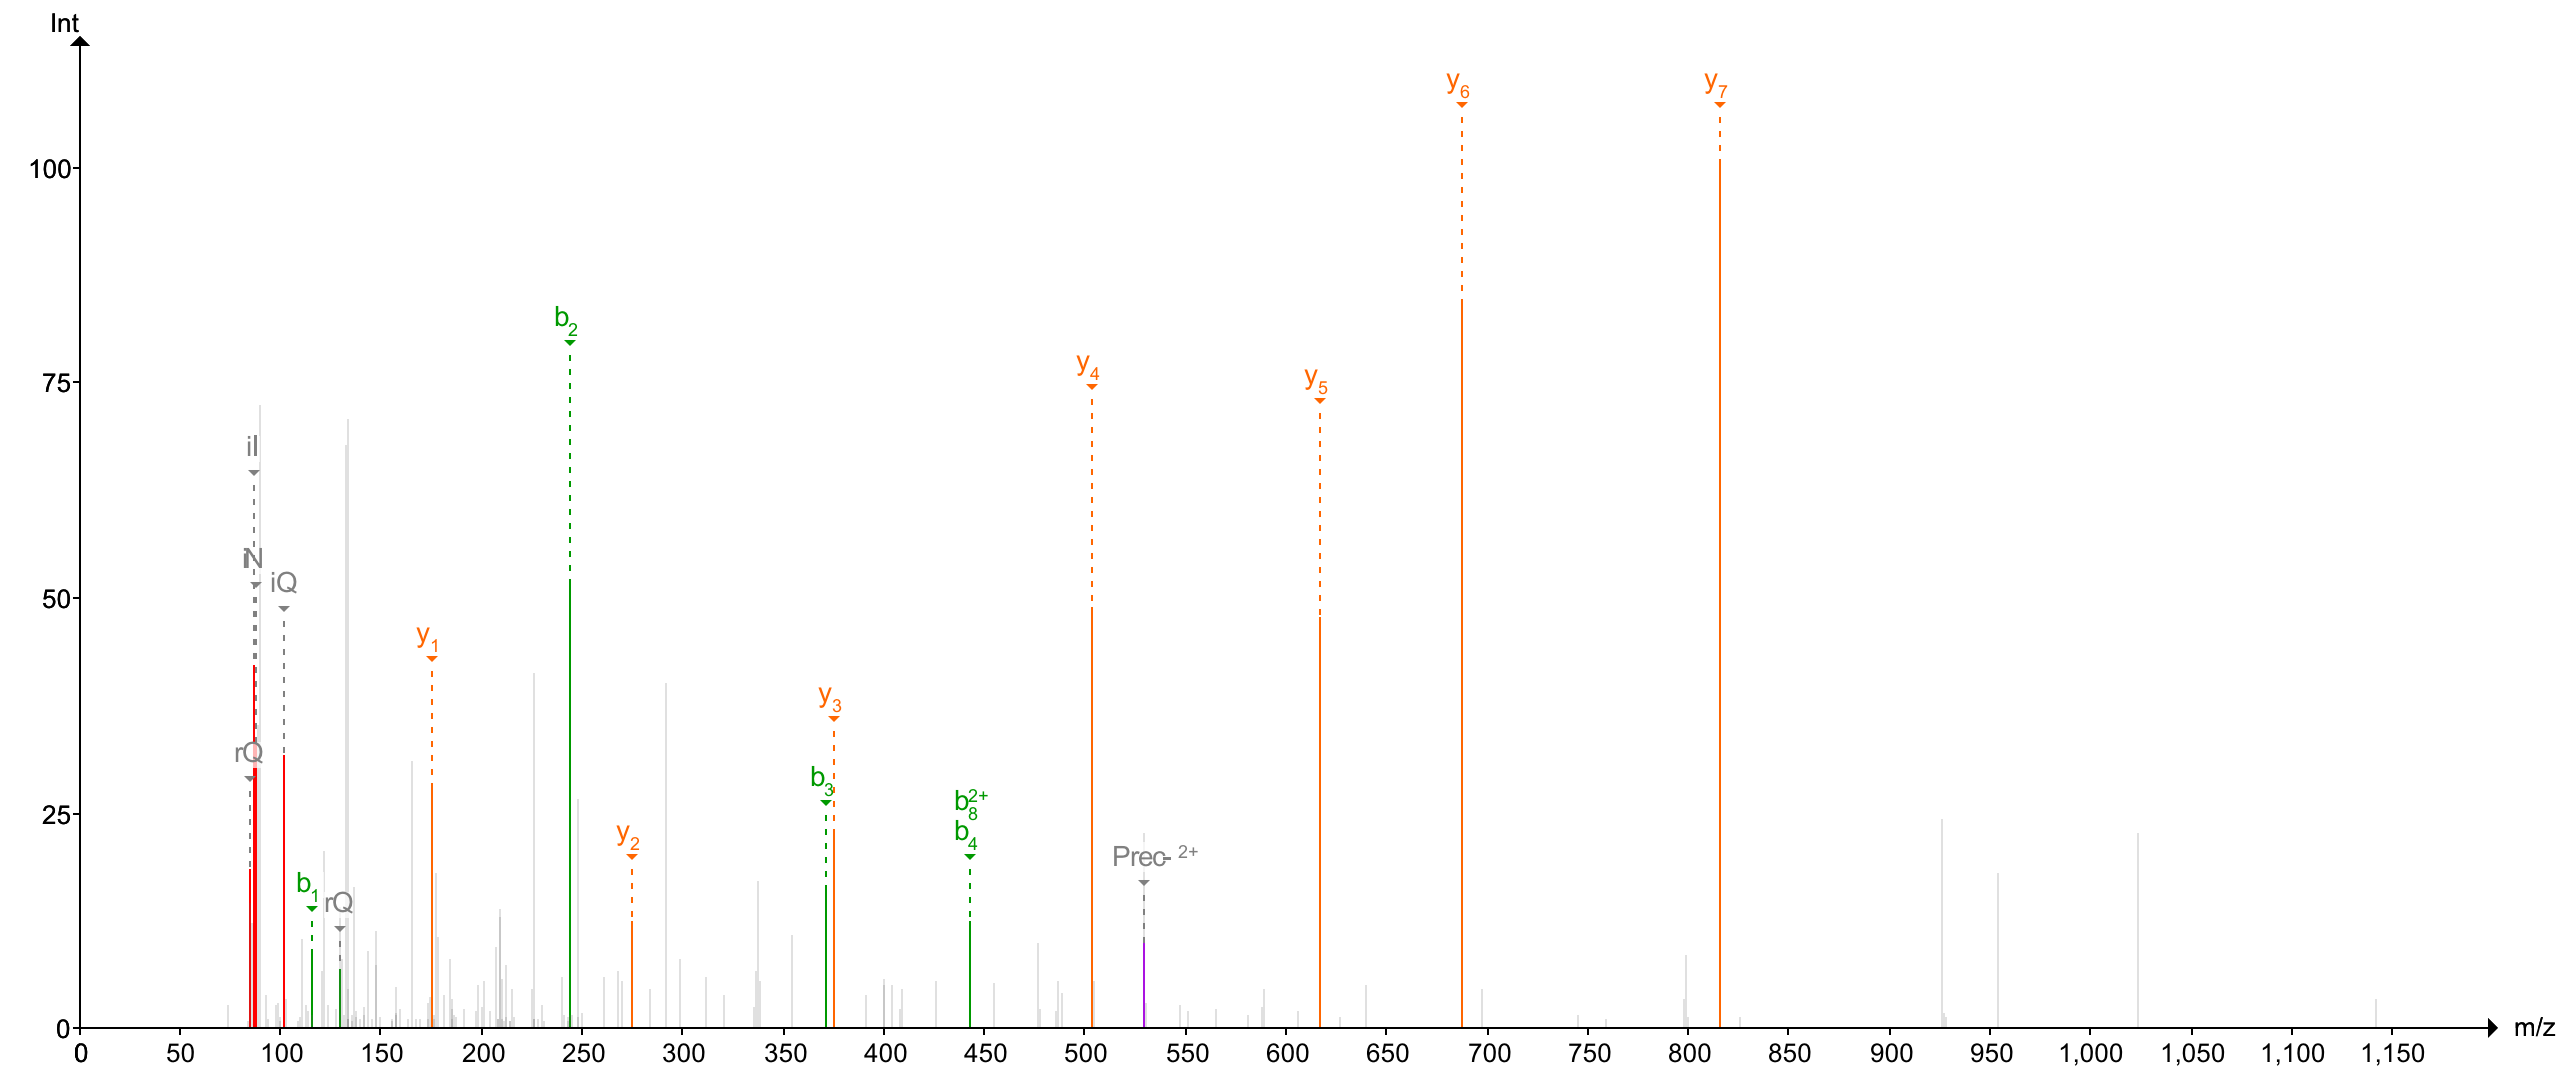

NH<sub>2</sub>-V H<sub>1</sub>P A<sub>1</sub>L<sub>1</sub>N<sub>1</sub>V<sub>1</sub>S<sub>1</sub>T<sub>1</sub>R-COOH

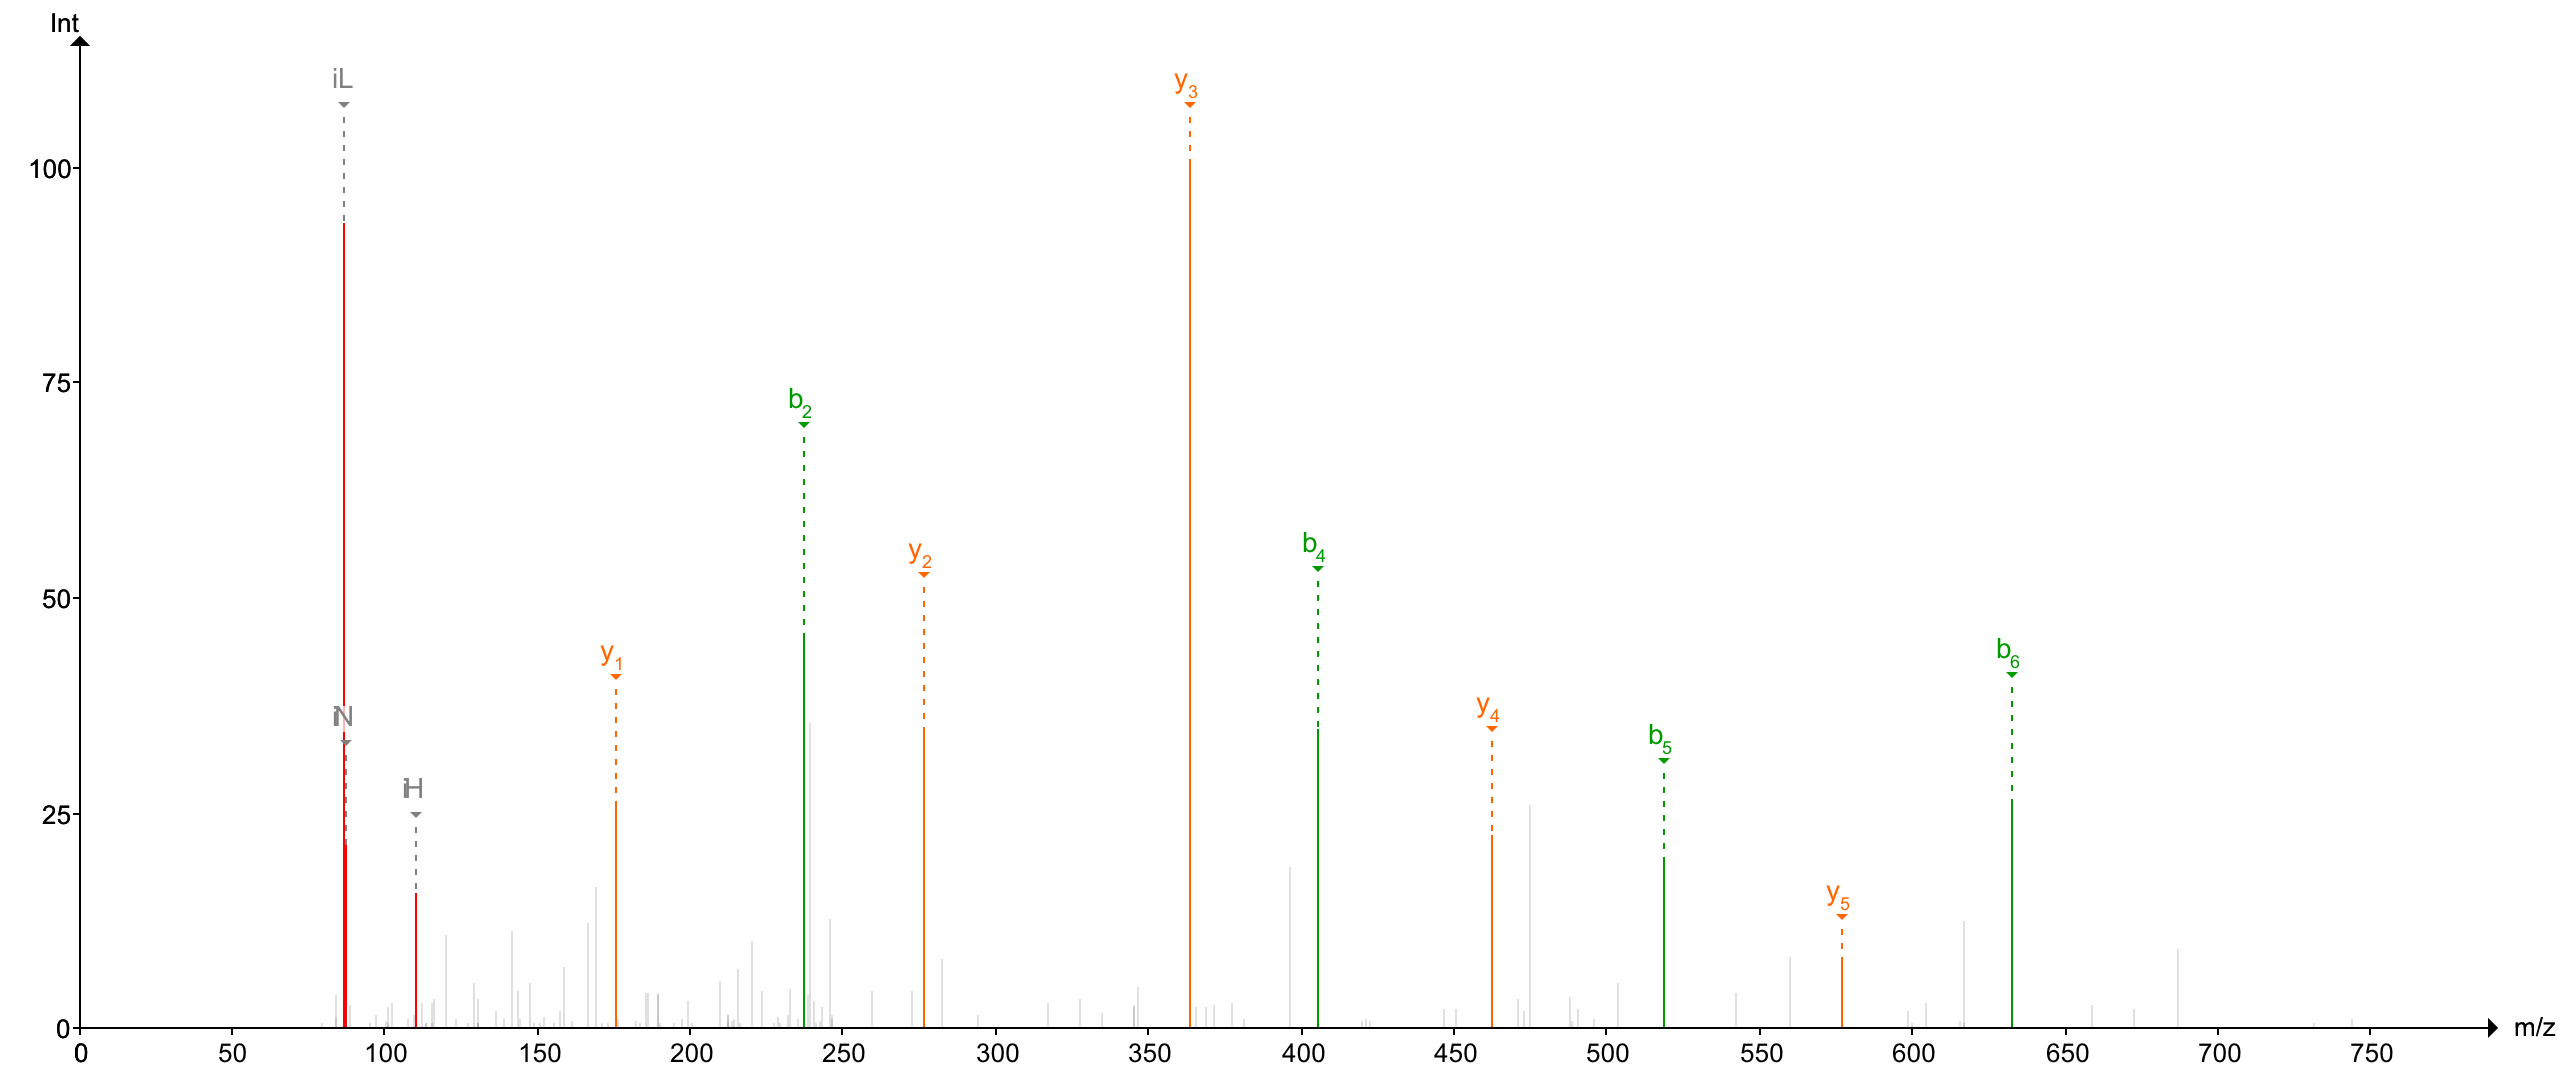

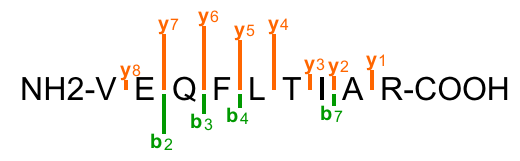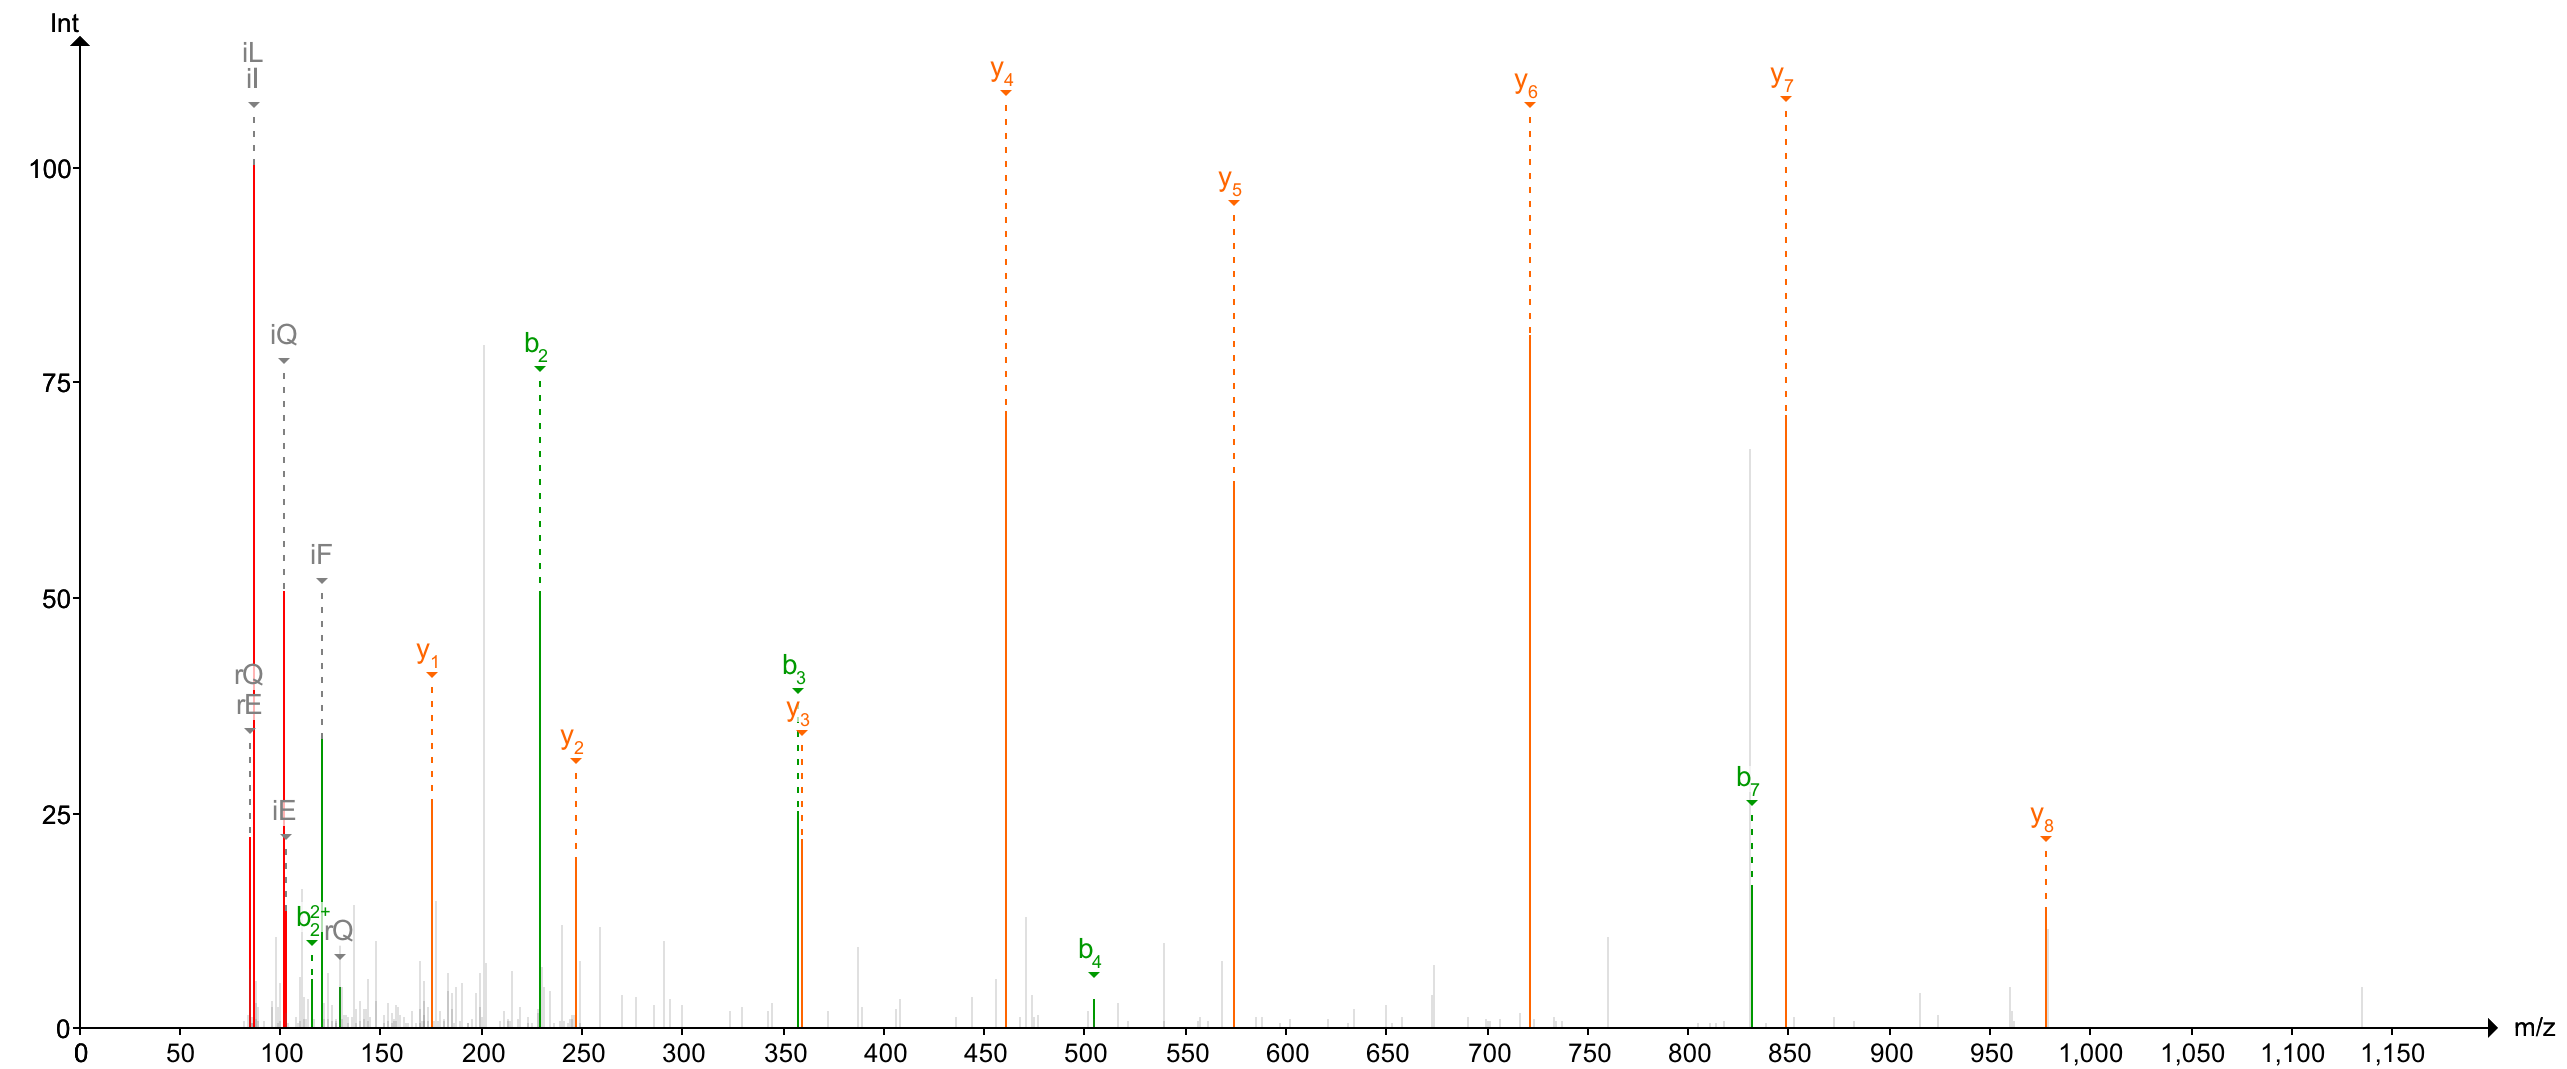

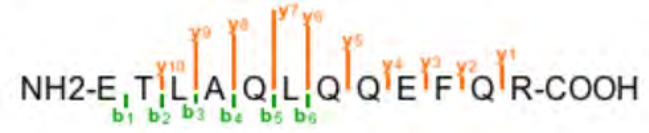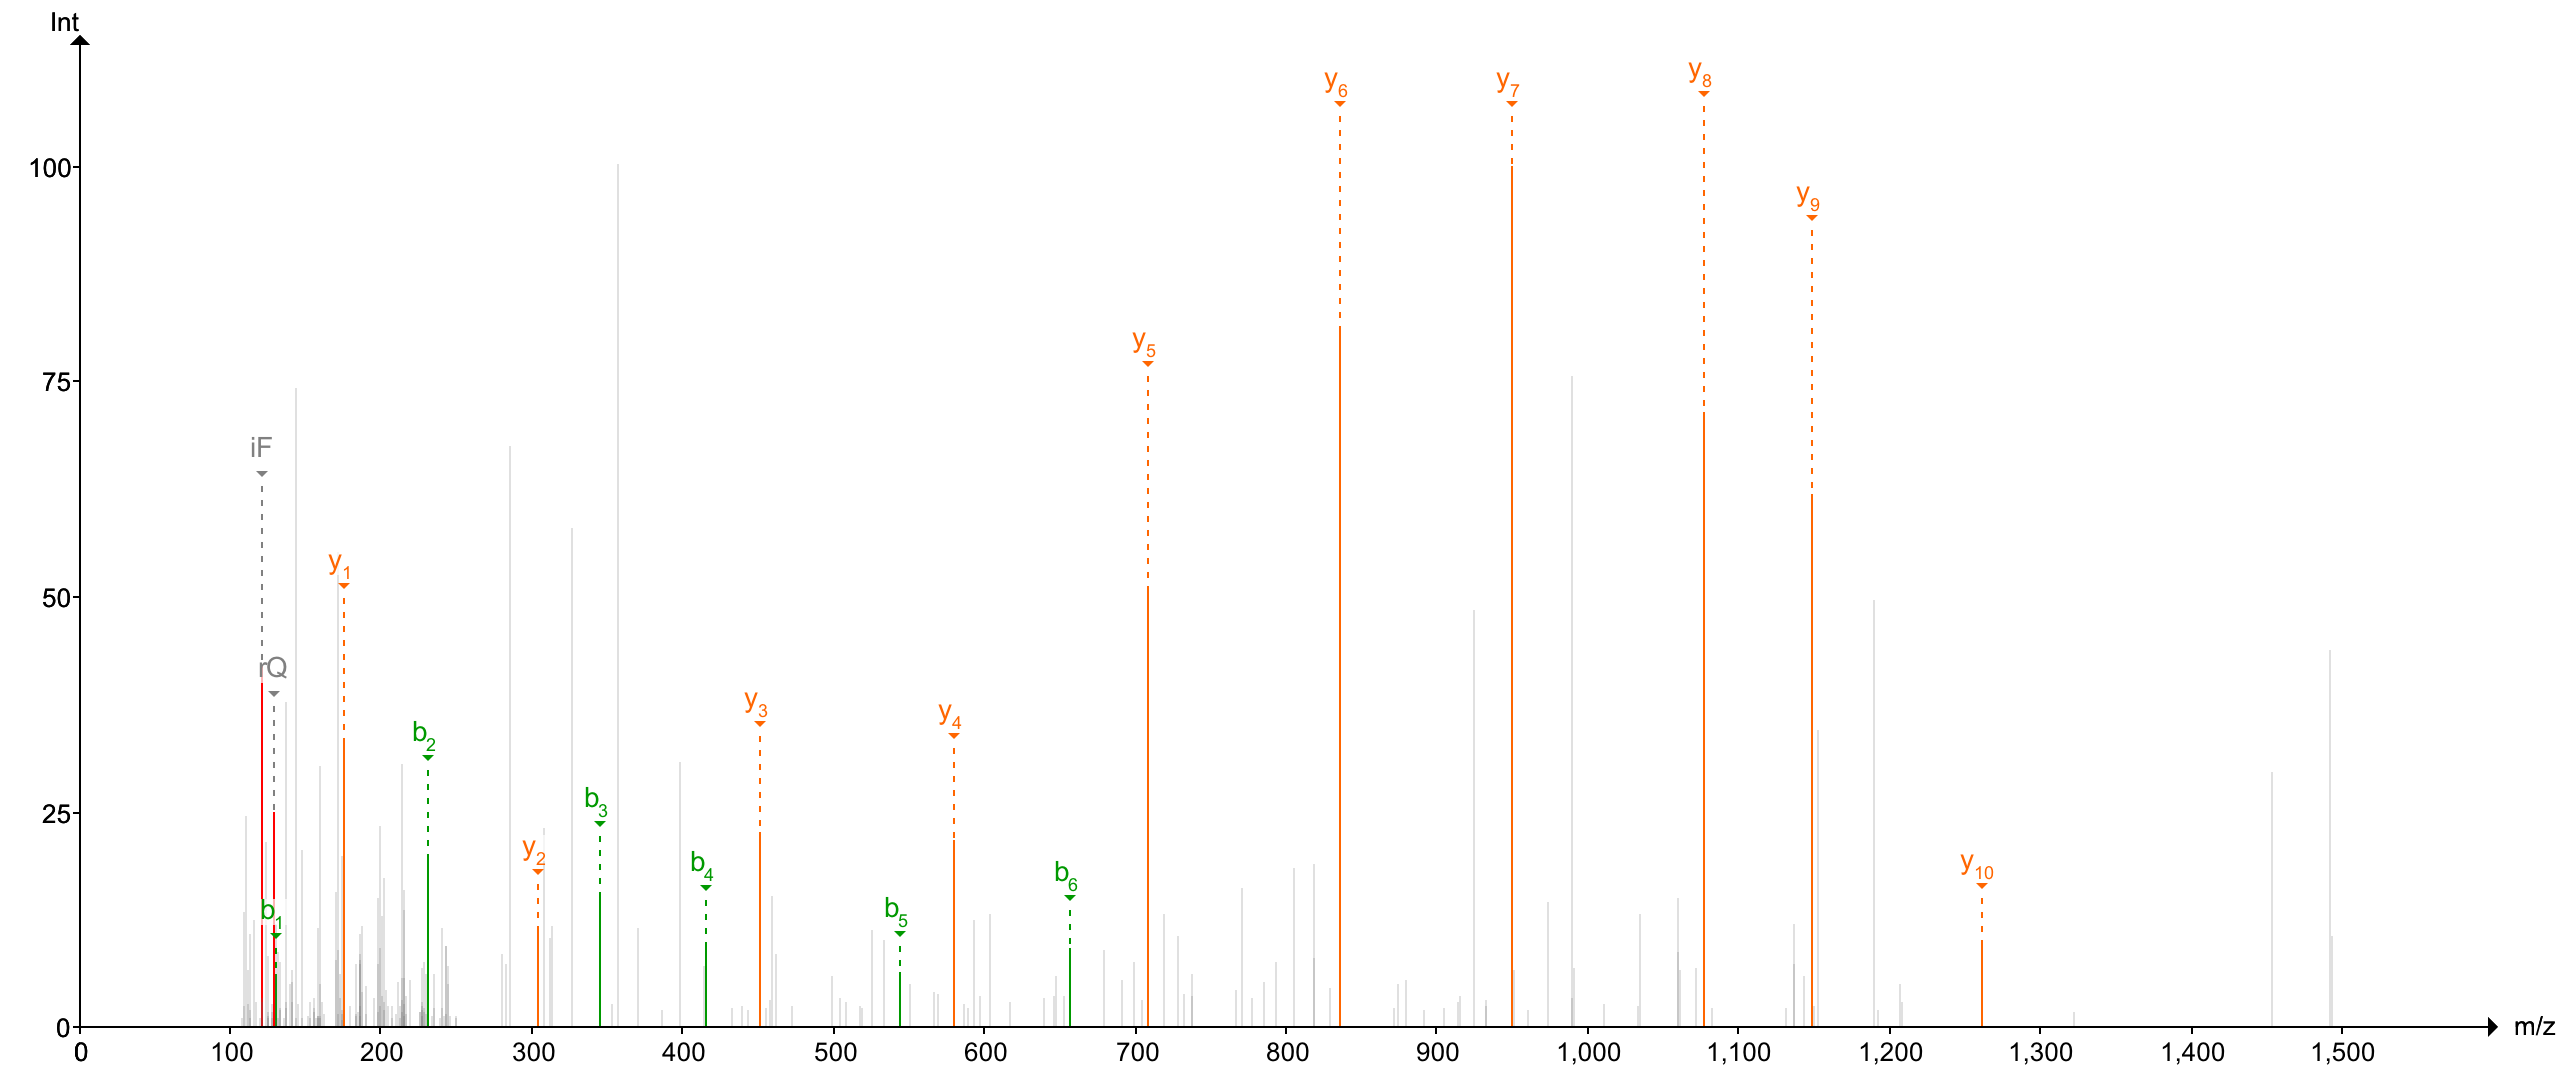

NH<sub>2</sub>-L V E<sub>1</sub>L<sub>1</sub>A<sub>1</sub>G Q S<sub>1</sub>L<sub>1</sub>L<sub>1</sub>K-COOH

b<sub>3</sub> b<sub>4</sub> b<sub>5</sub>

y<sub>1</sub> y<sub>2</sub> y<sub>3</sub>

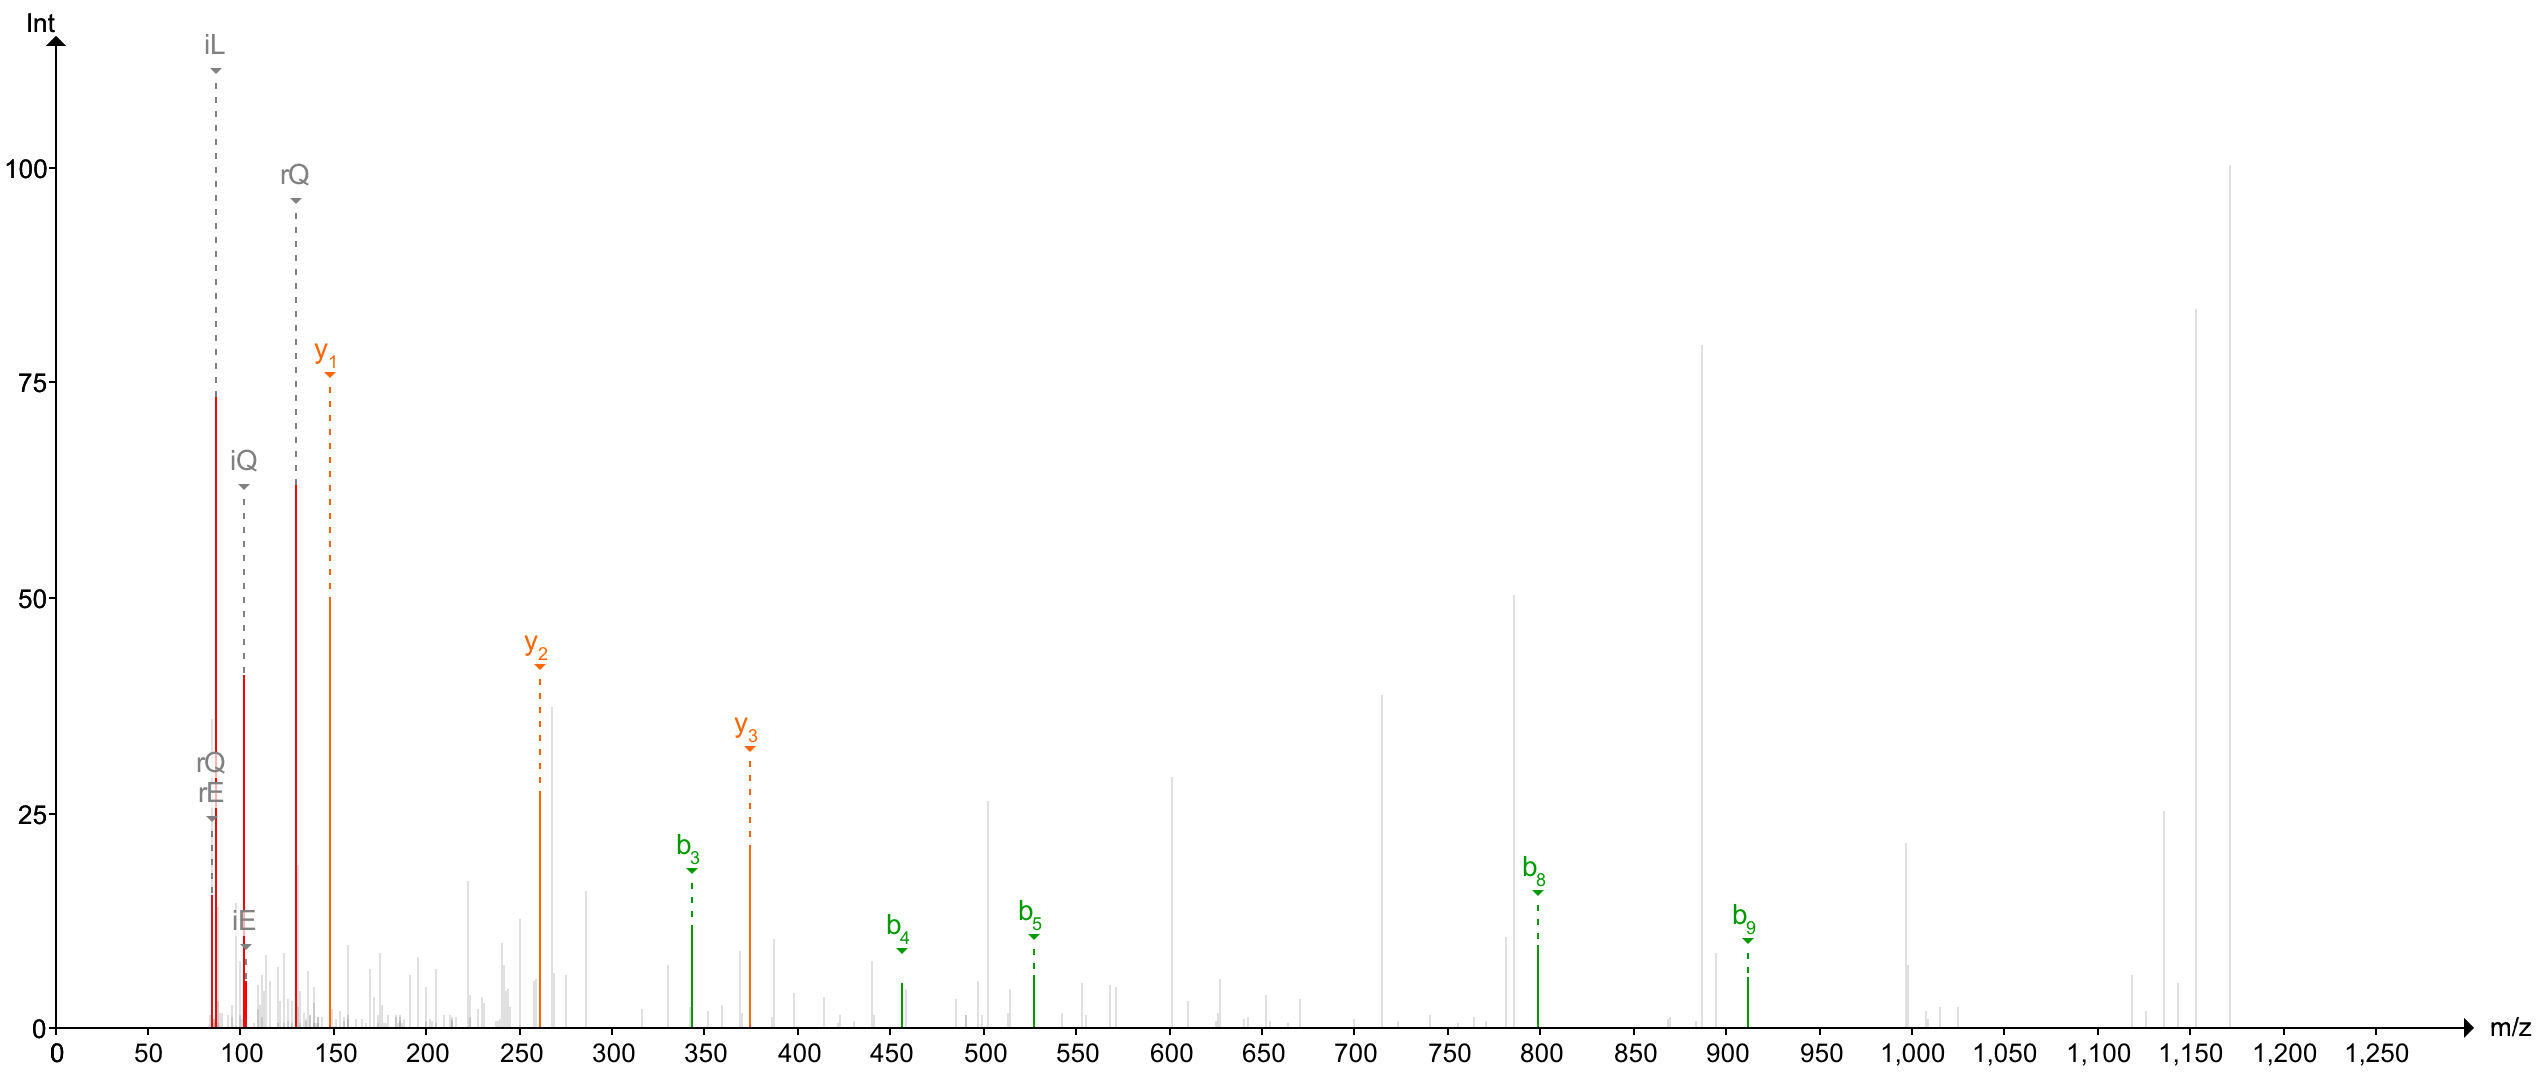

NH<sub>2</sub>-H W I E I V L L Y R-COOH

y<sub>4</sub> y<sub>3</sub> y<sub>2</sub> y<sub>1</sub>  
b<sub>6</sub> b<sub>7</sub>

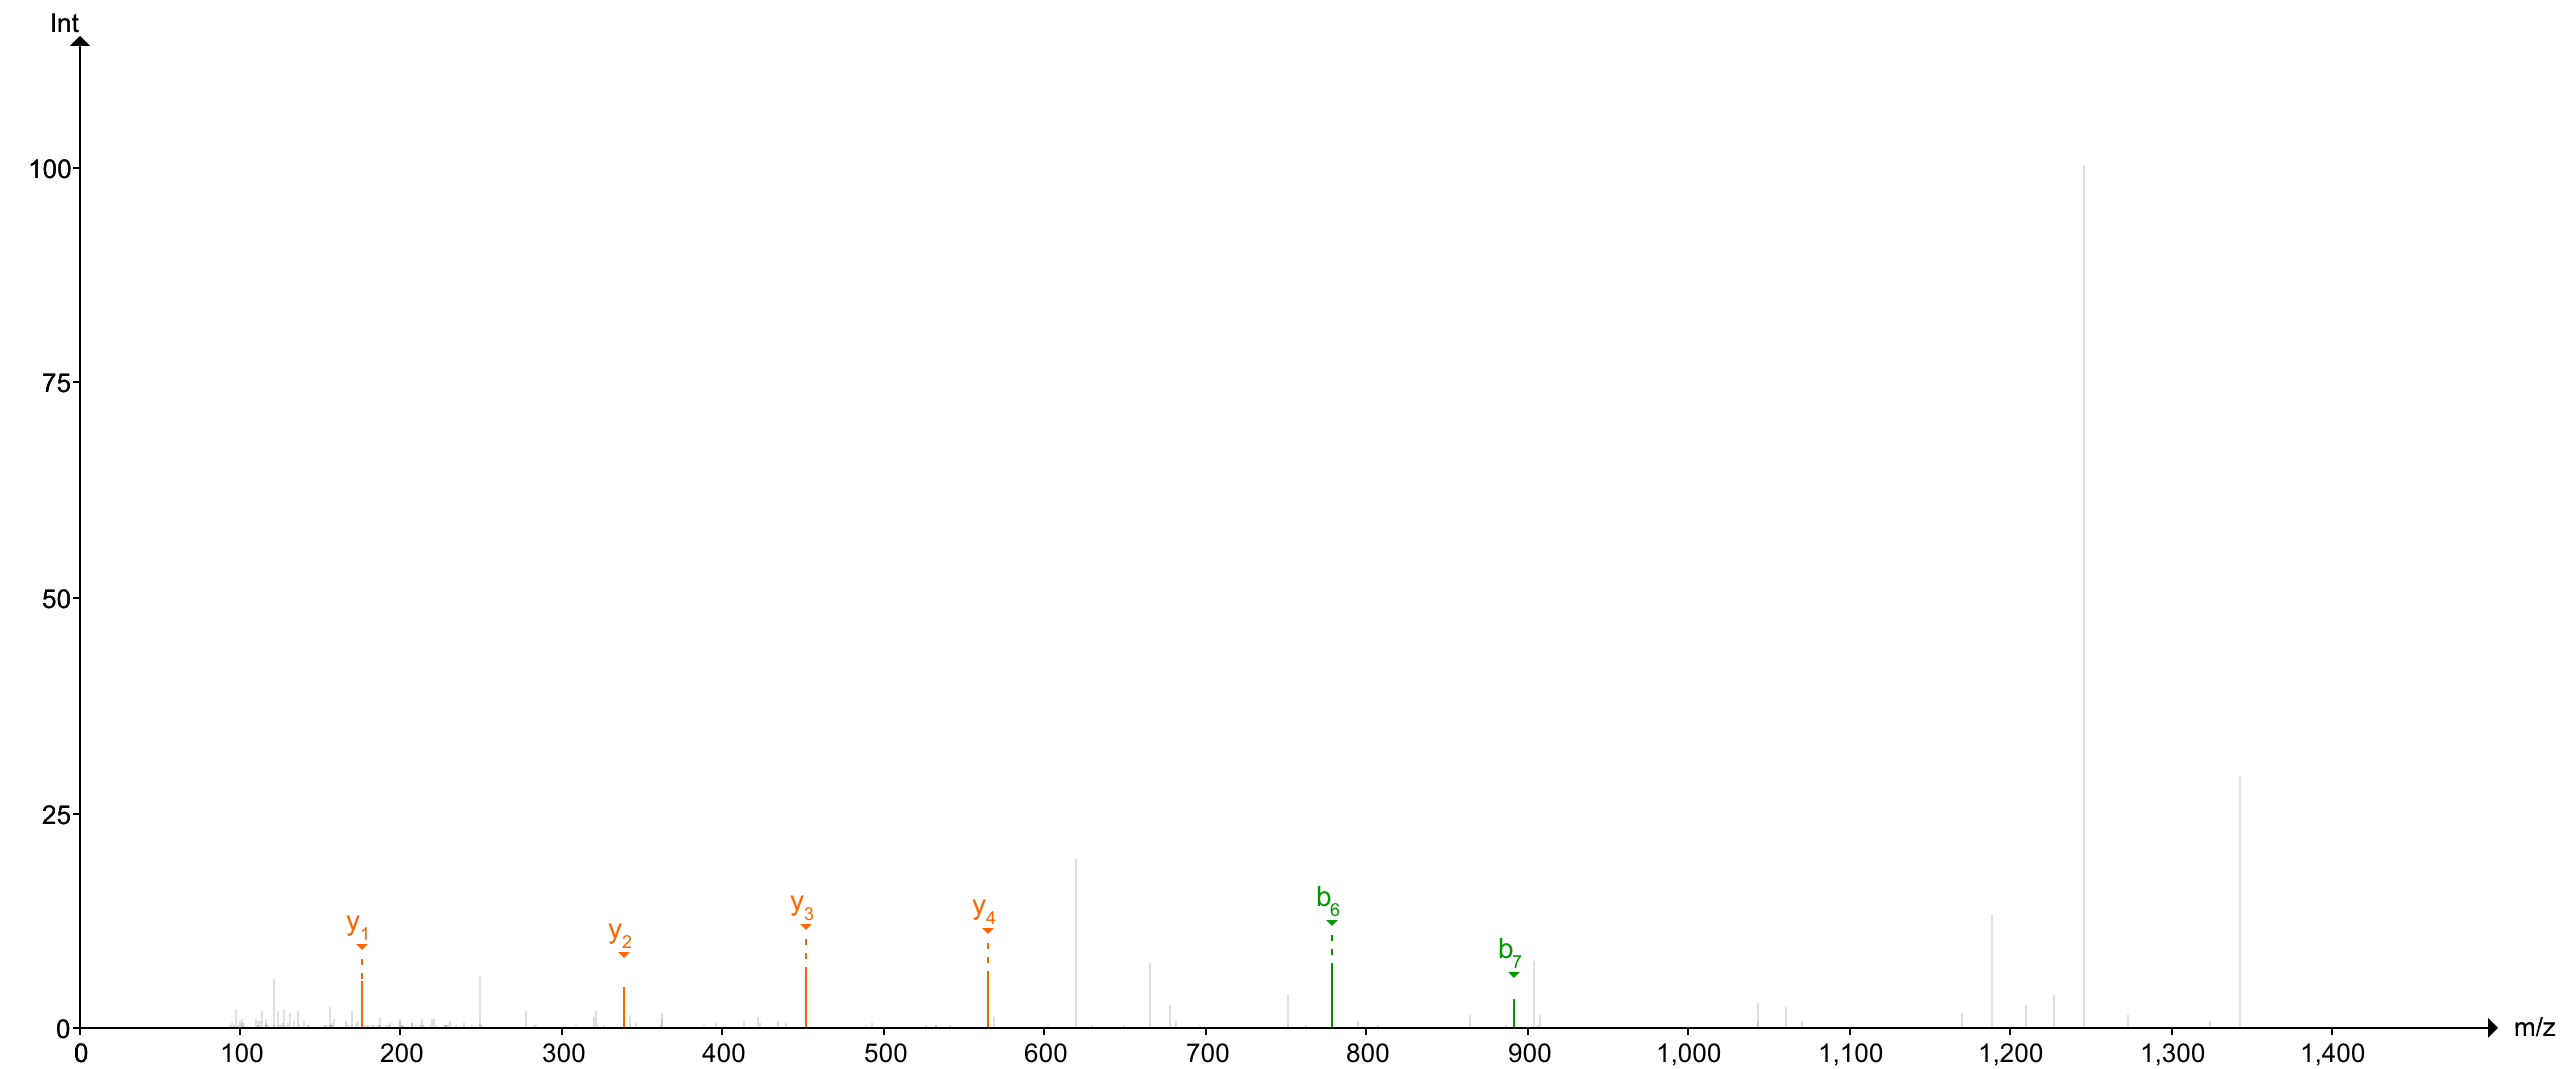

NH<sub>2</sub>-L L I I Y G A S T L E T G V P S I R-COOH

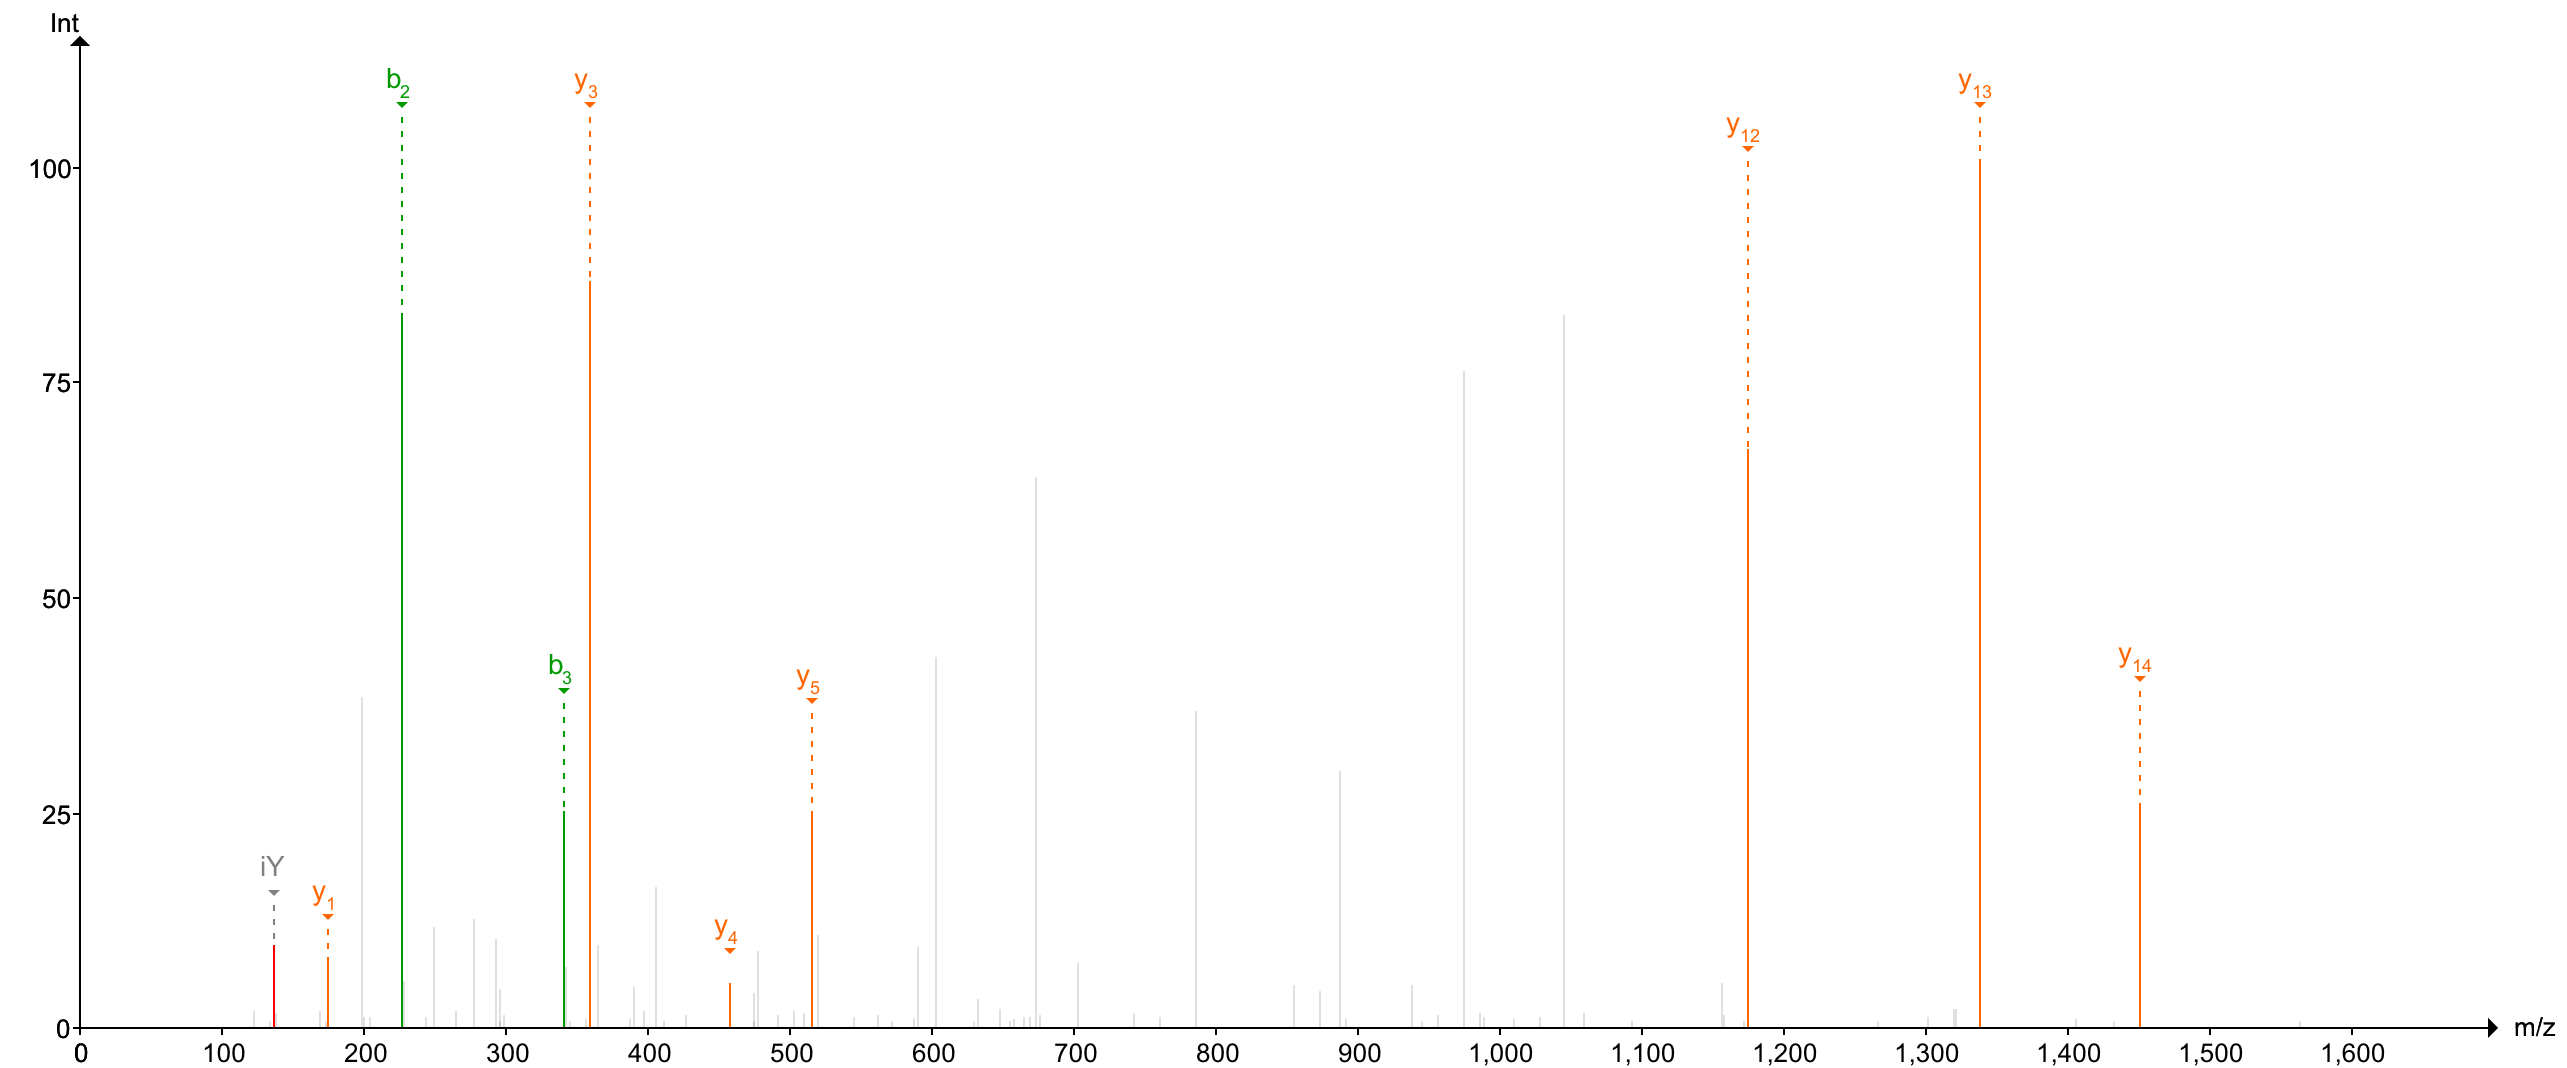



NH<sub>2</sub>-L L I Y A A S S L E T G V P S I R-COOH

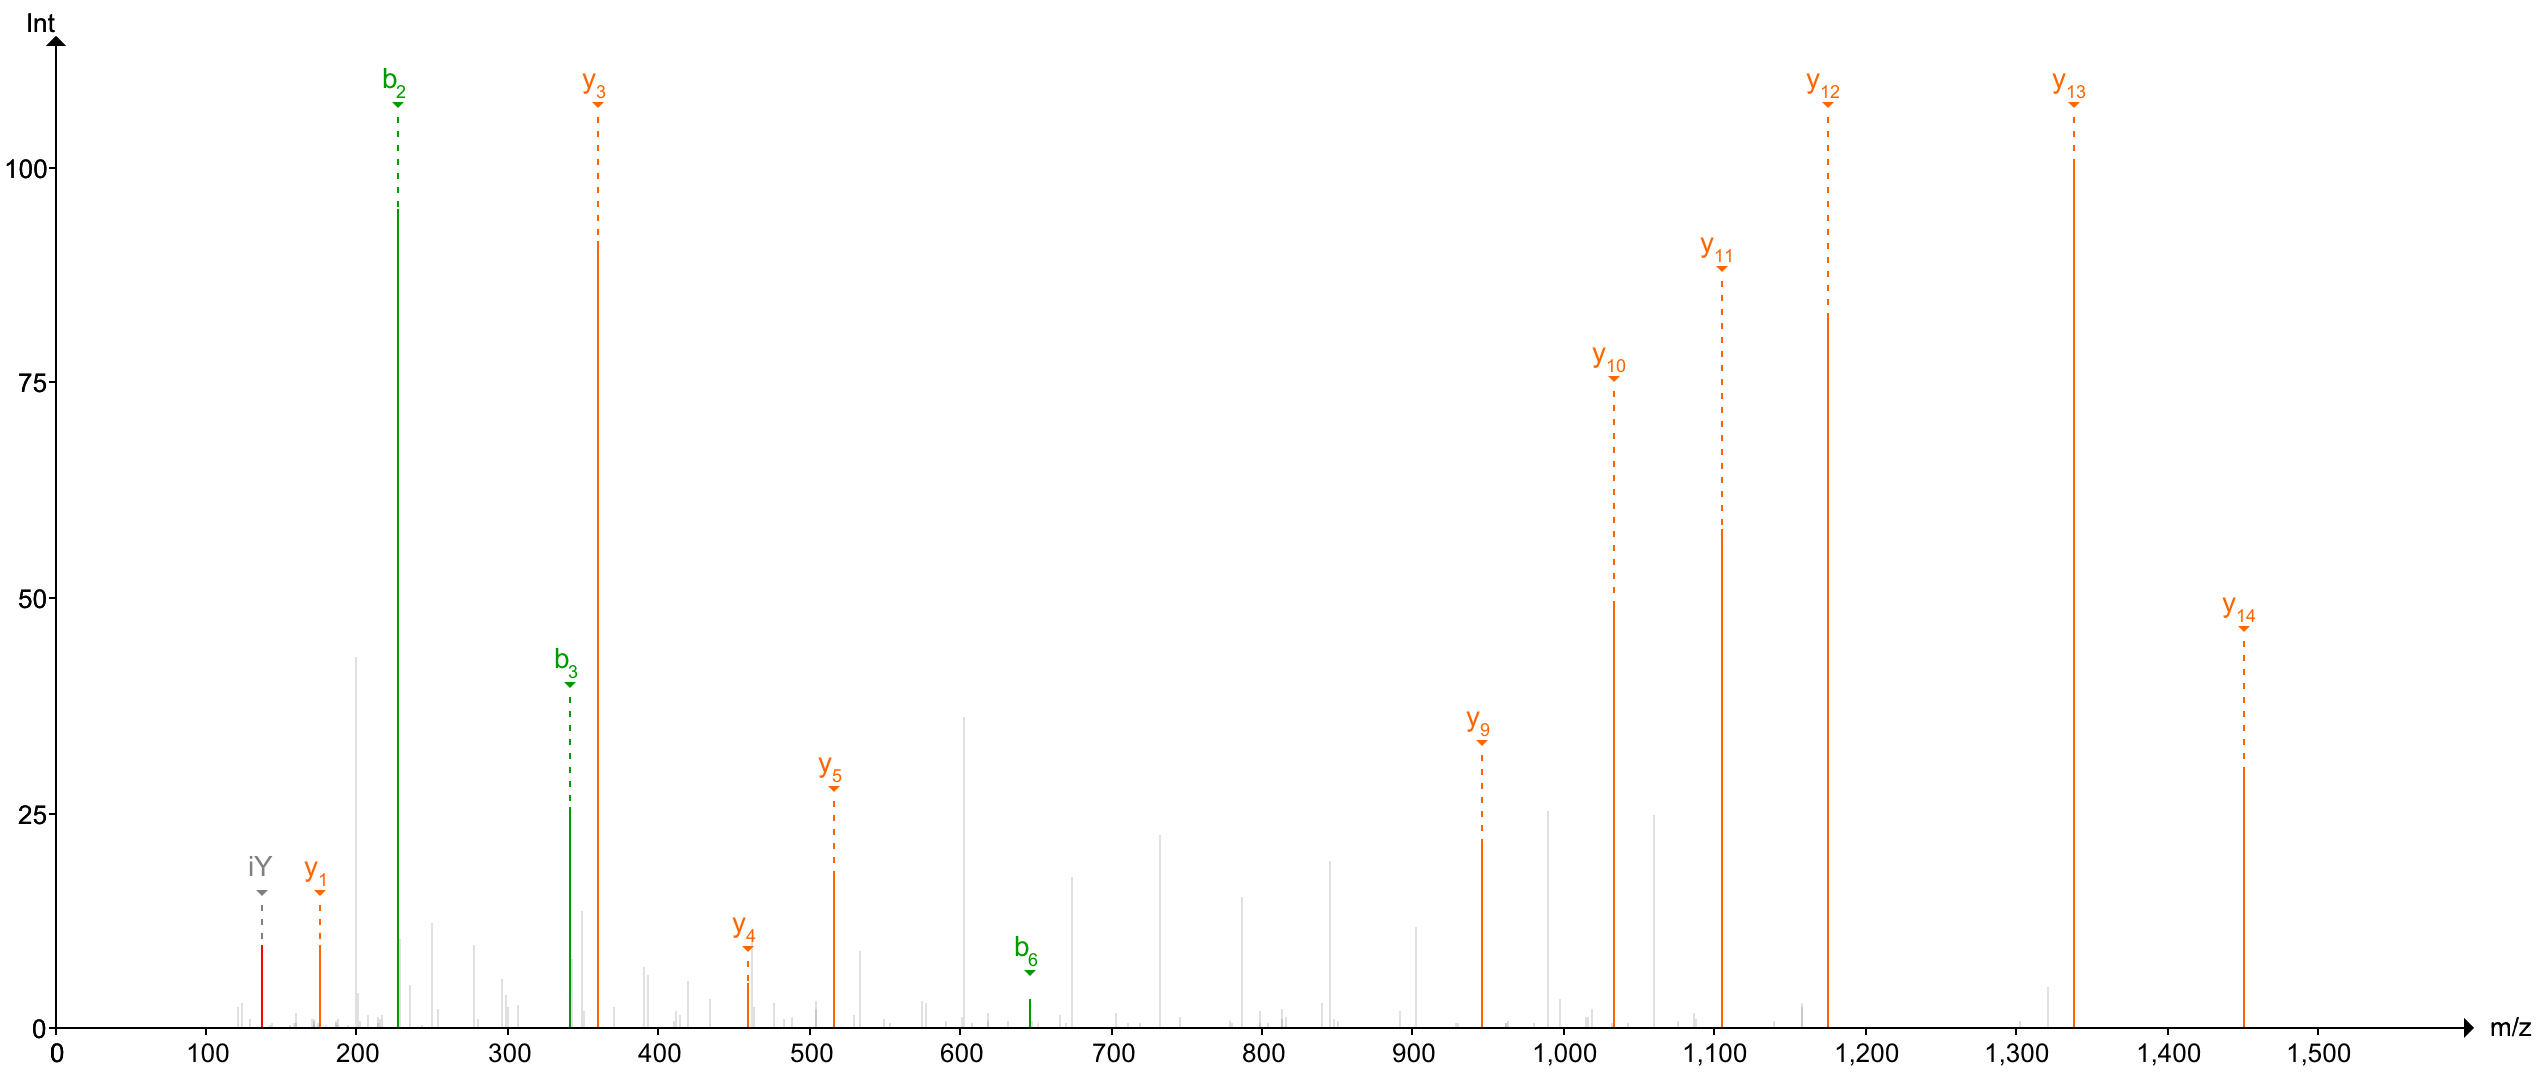

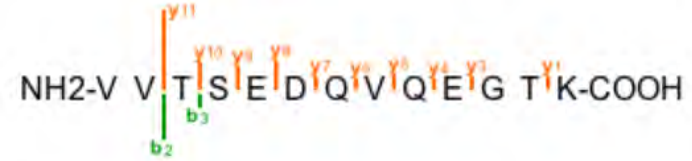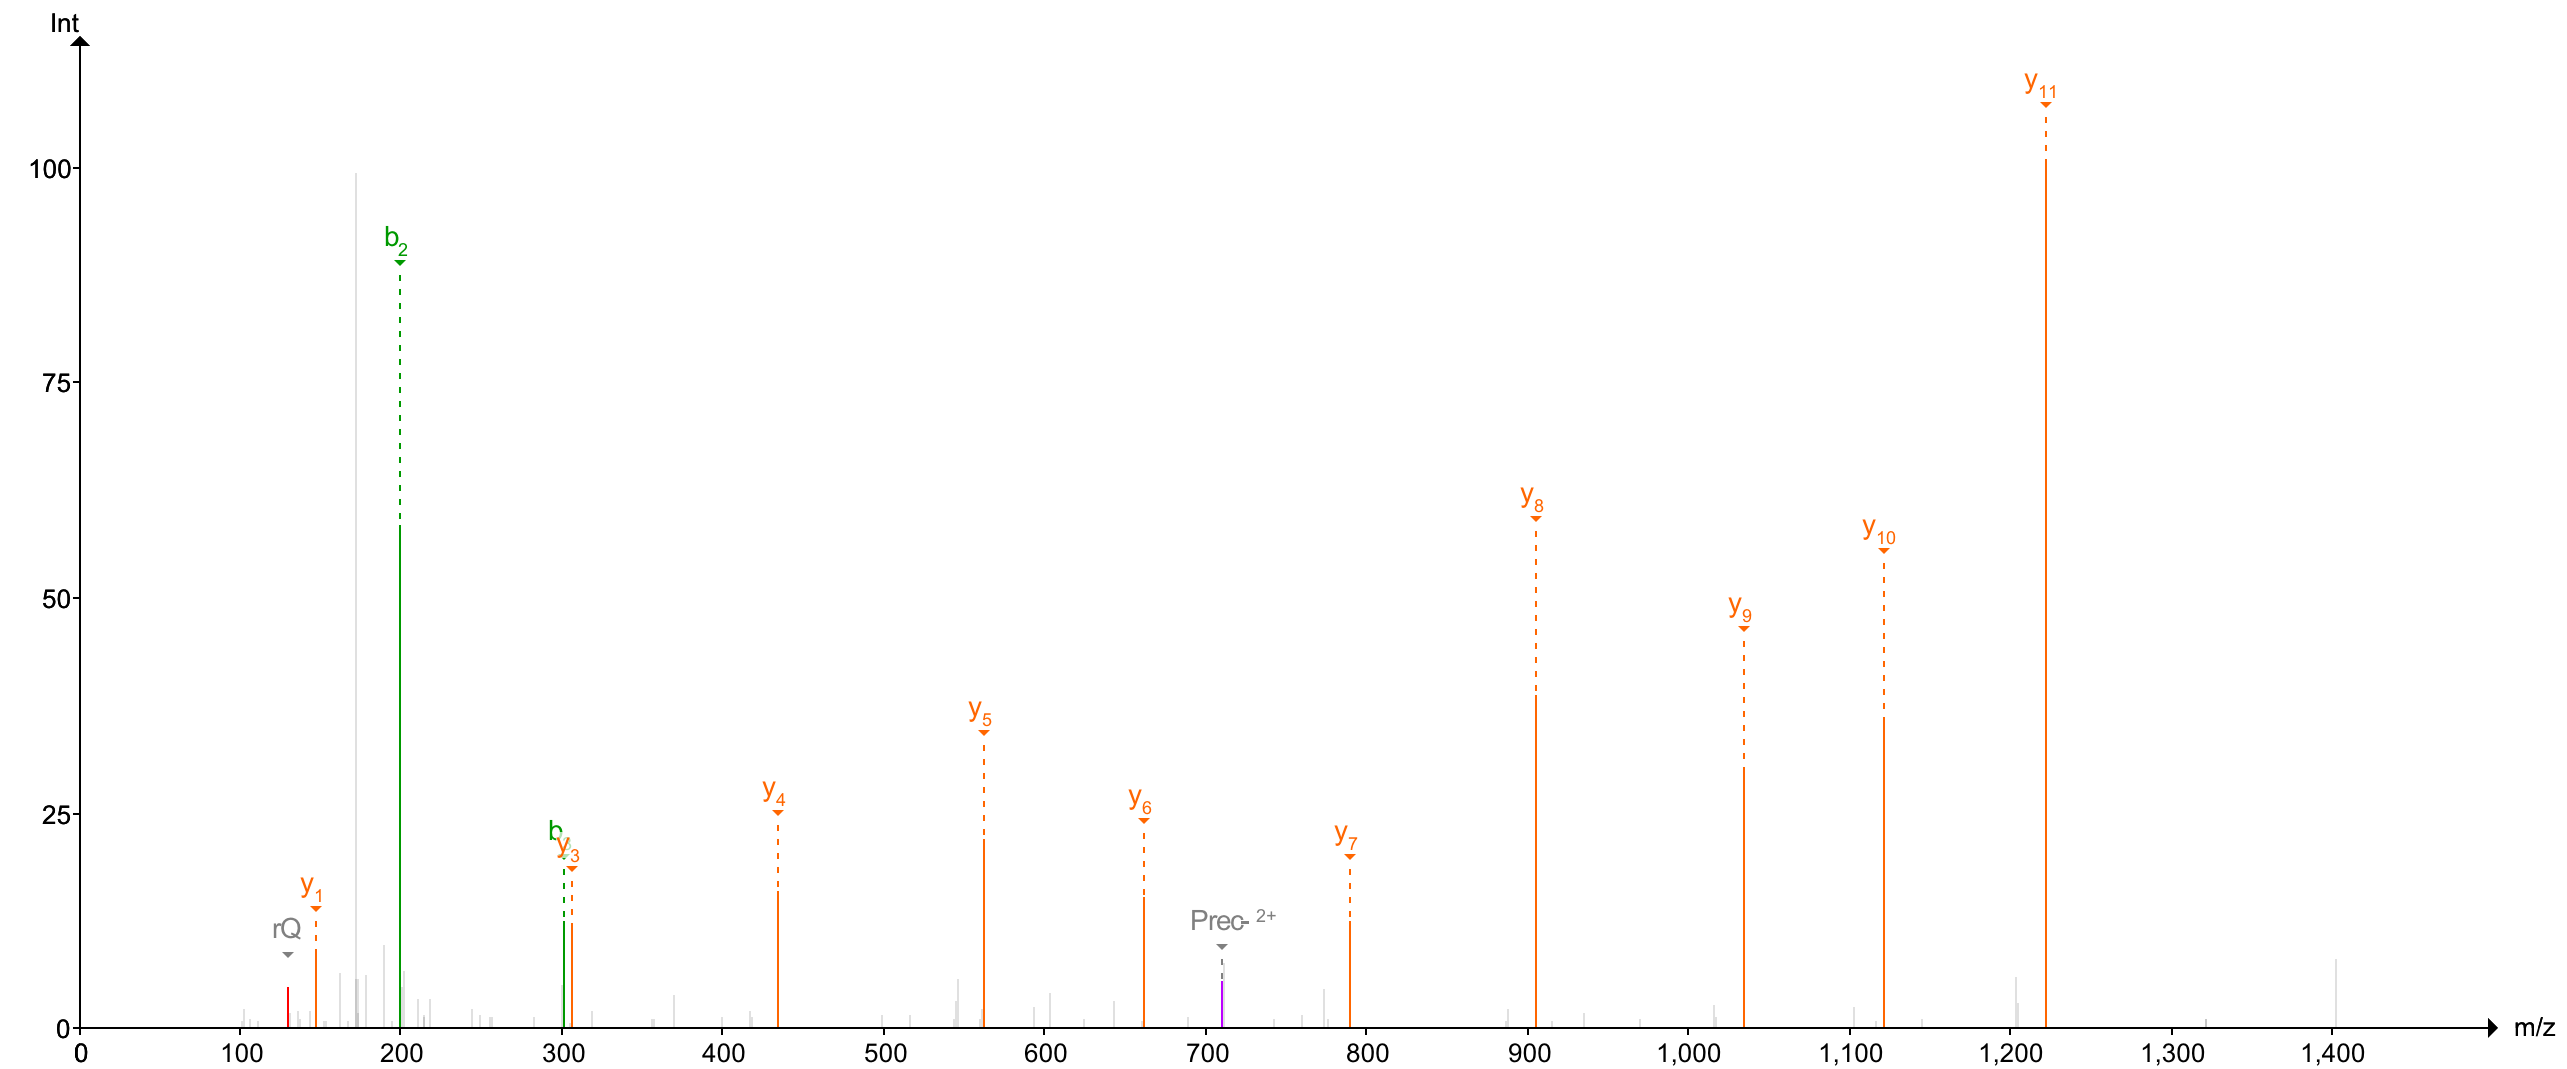

NH<sub>2</sub>-L E<sup>y<sub>10</sub></sup> Q<sup>y<sub>9</sub></sup> E<sup>y<sub>8</sub></sup> E<sup>y<sub>7</sub></sup> P L T<sup>y<sub>6</sub></sup> D<sup>y<sub>5</sub></sup> A<sup>y<sub>4</sub></sup> E<sup>y<sub>3</sub></sup> R-COOH  
b<sub>2</sub> b<sub>3</sub> b<sub>4</sub>

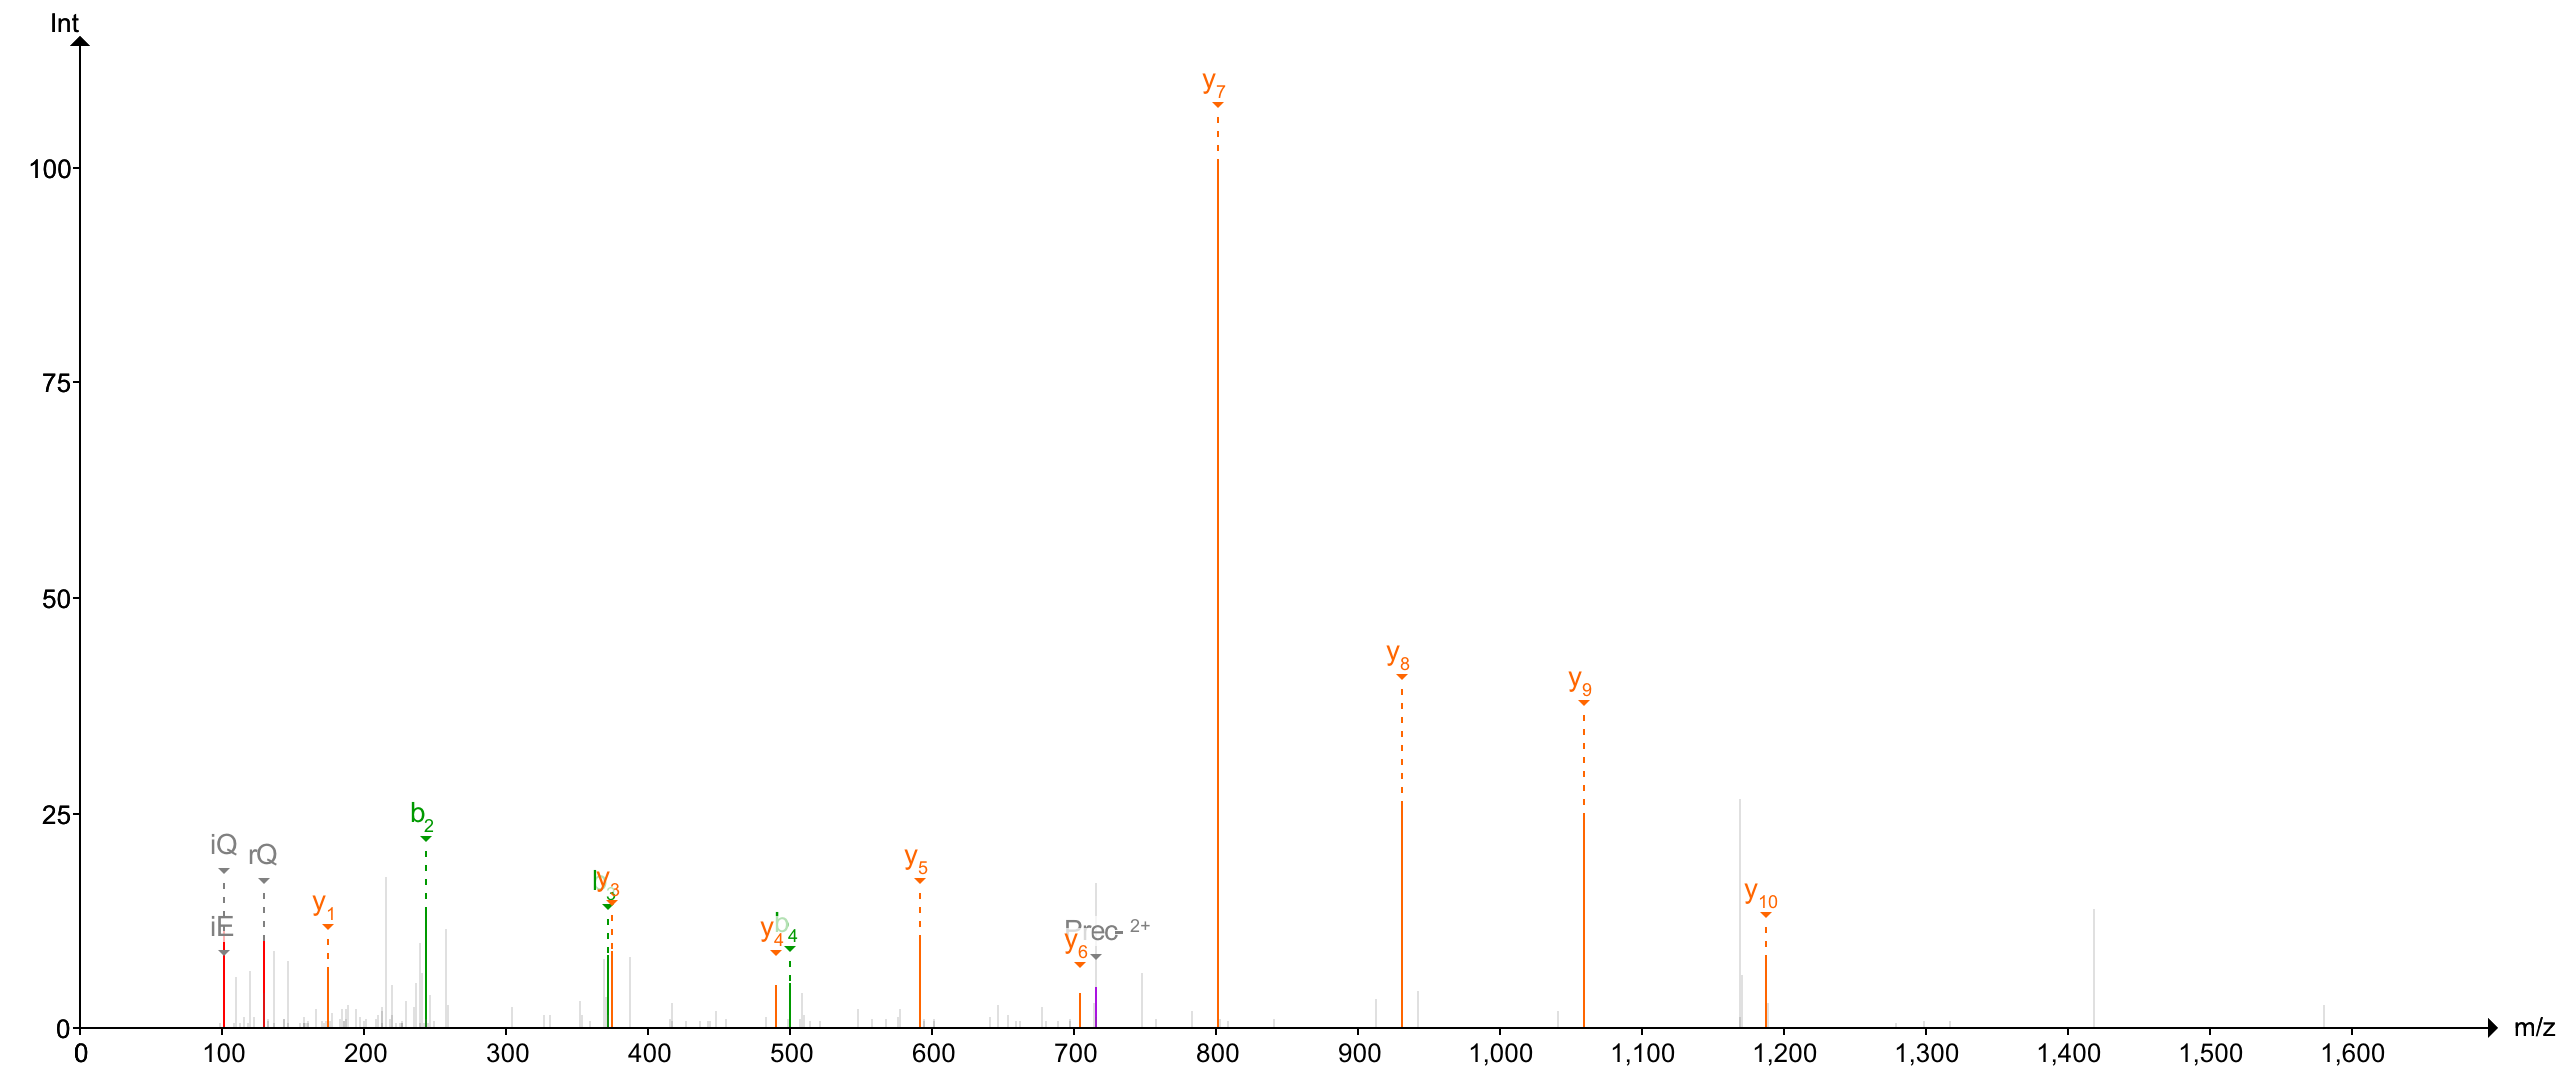

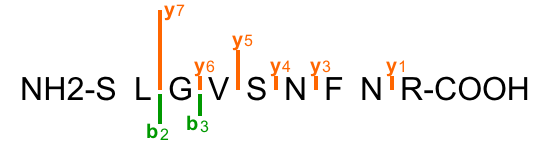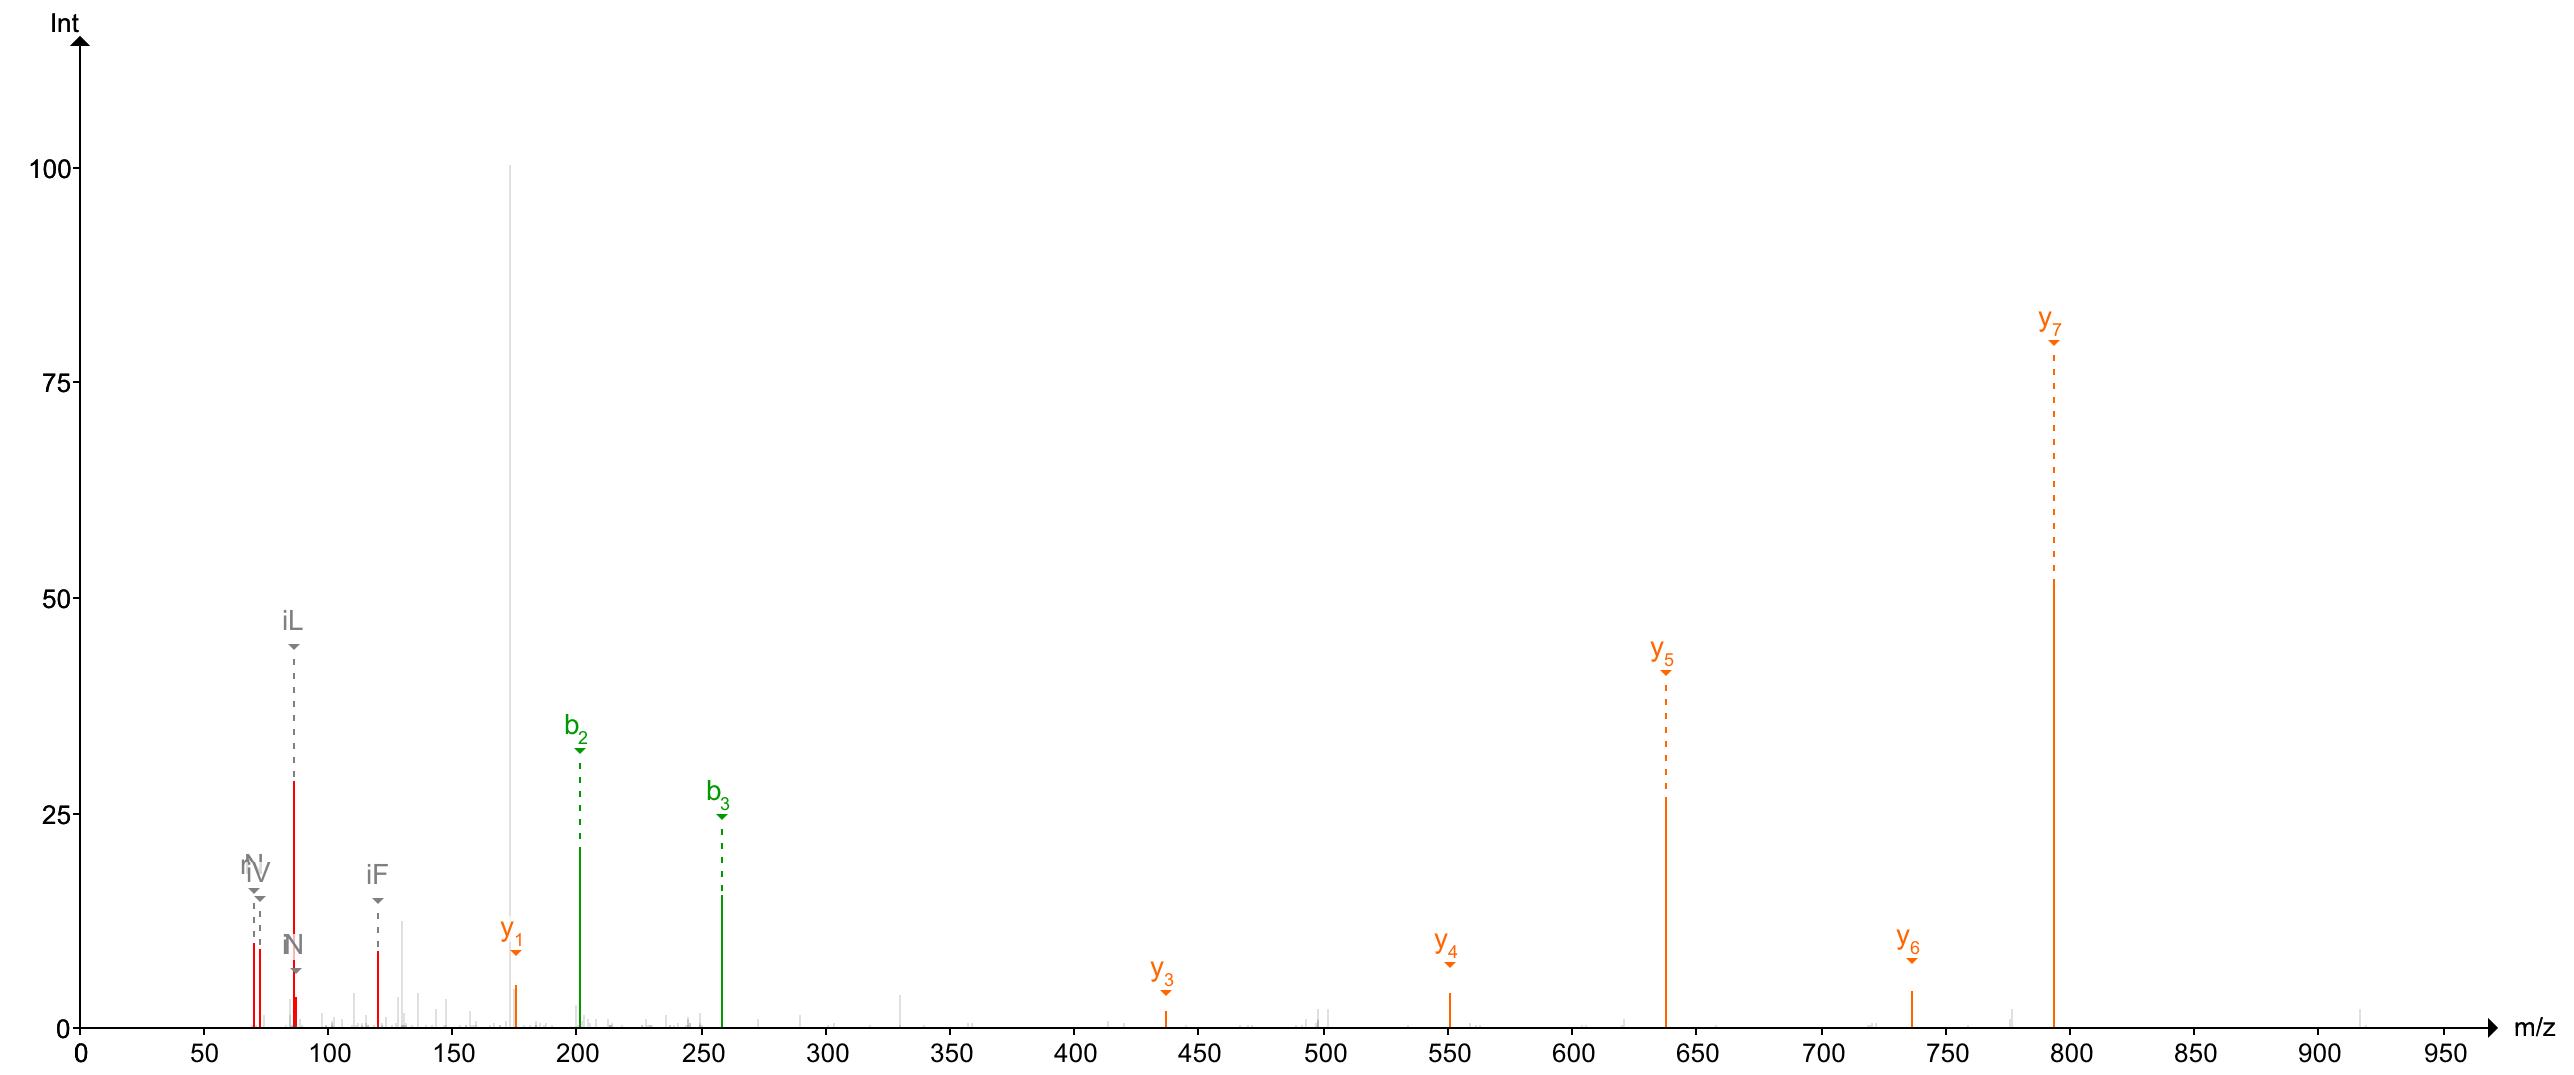

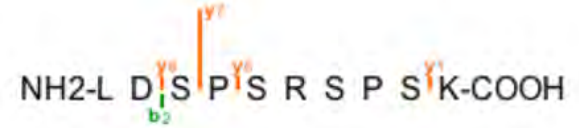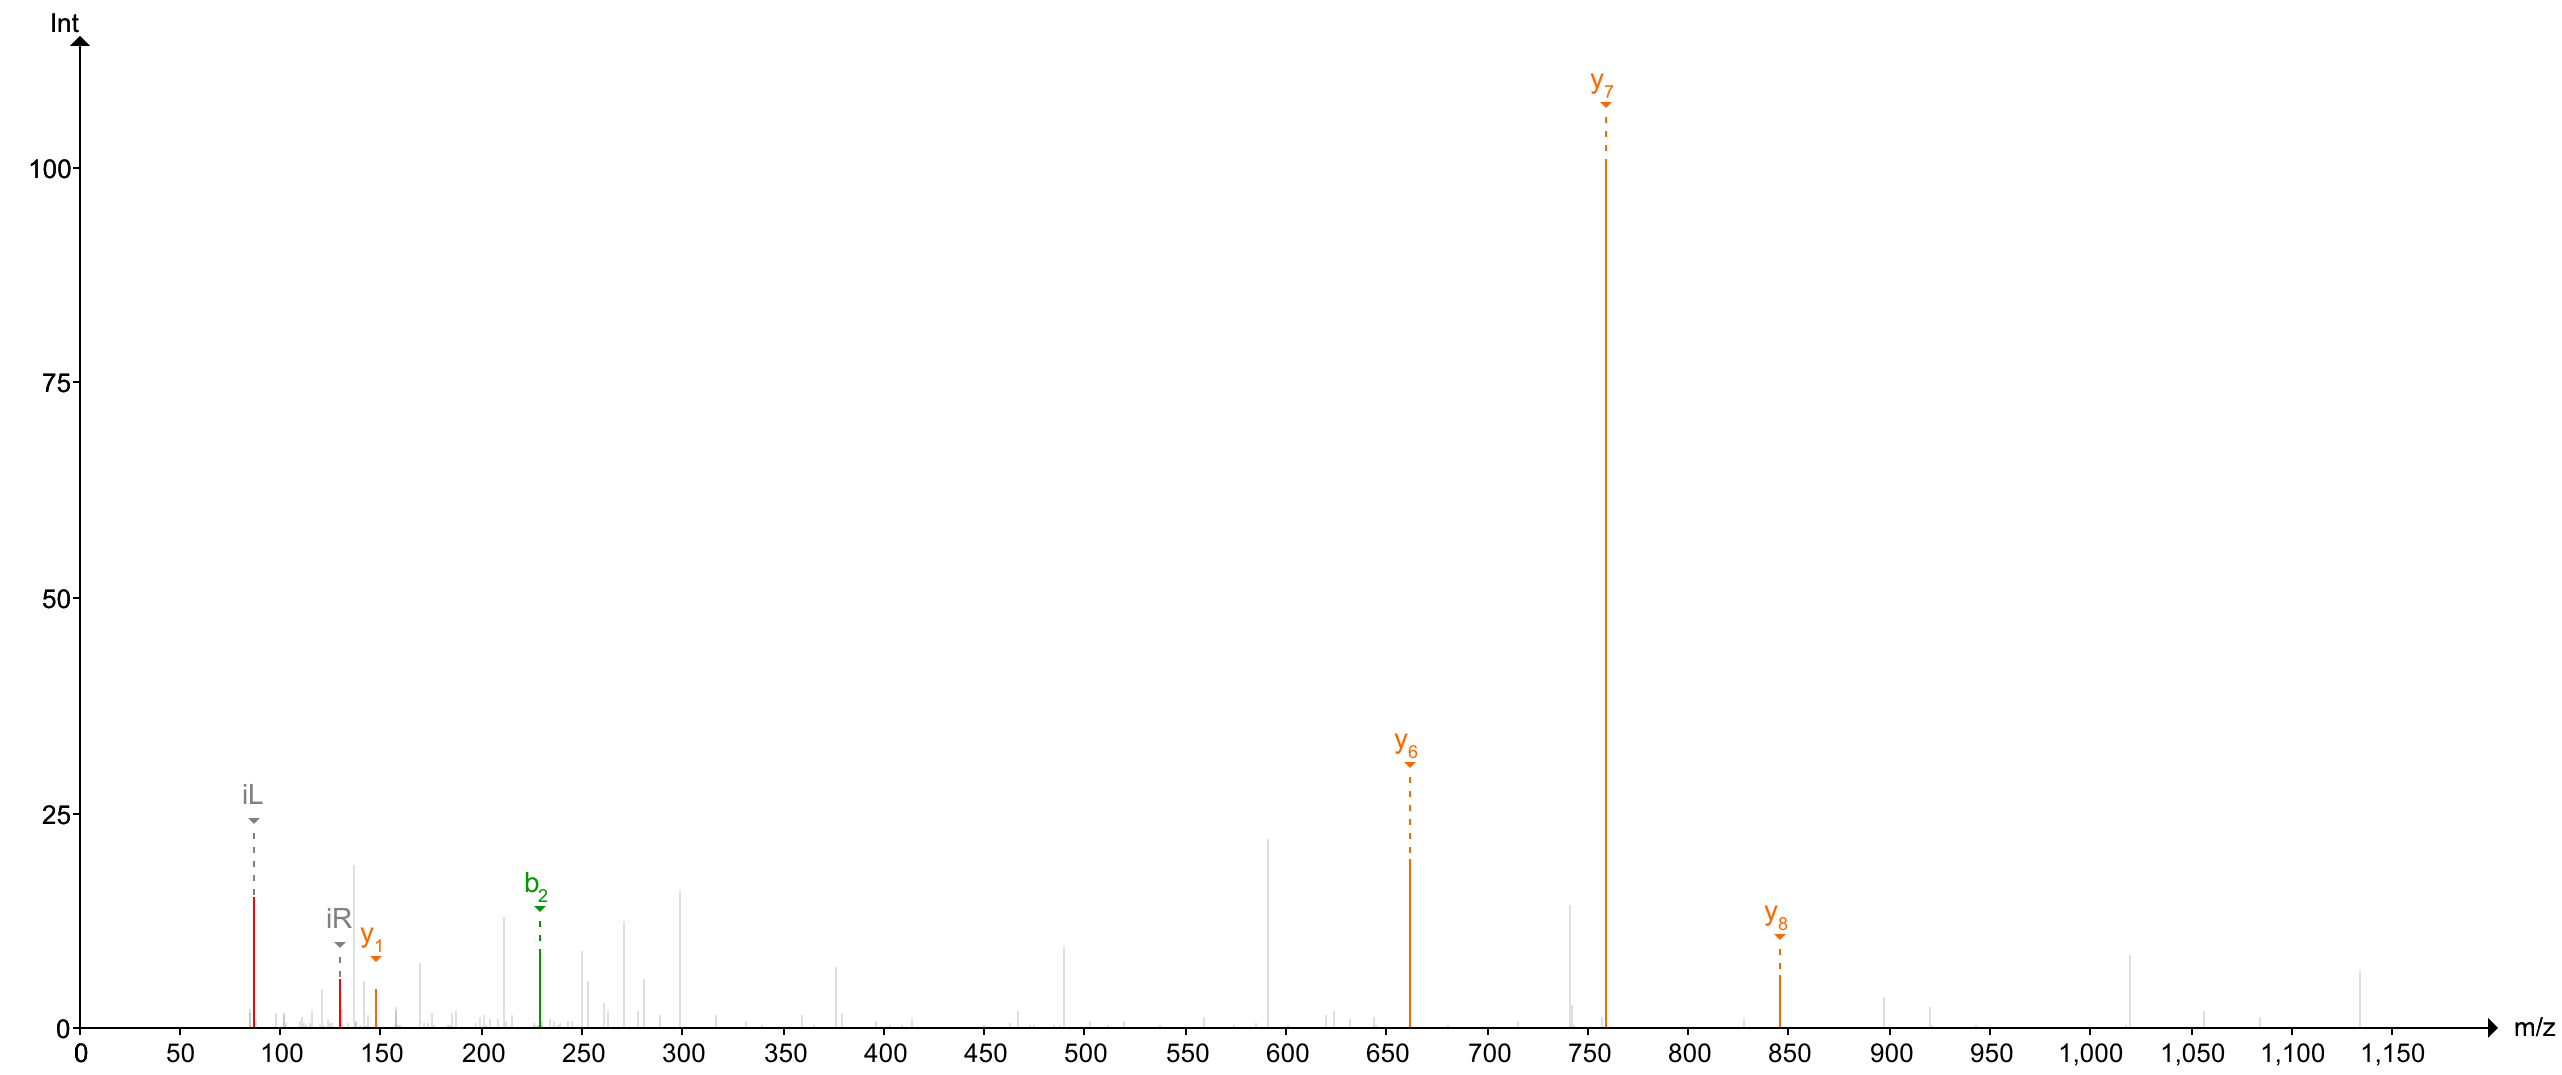

NH<sub>2</sub>-H **A**<sub>1</sub>G<sub>2</sub>S<sub>3</sub>H<sub>4</sub>S<sub>5</sub>H<sub>6</sub>P<sub>7</sub>H<sub>8</sub>N<sub>9</sub>T<sub>10</sub>Q<sub>11</sub>A<sub>12</sub>P<sub>13</sub>G<sub>14</sub>E<sub>15</sub>A<sub>16</sub>K-COOH

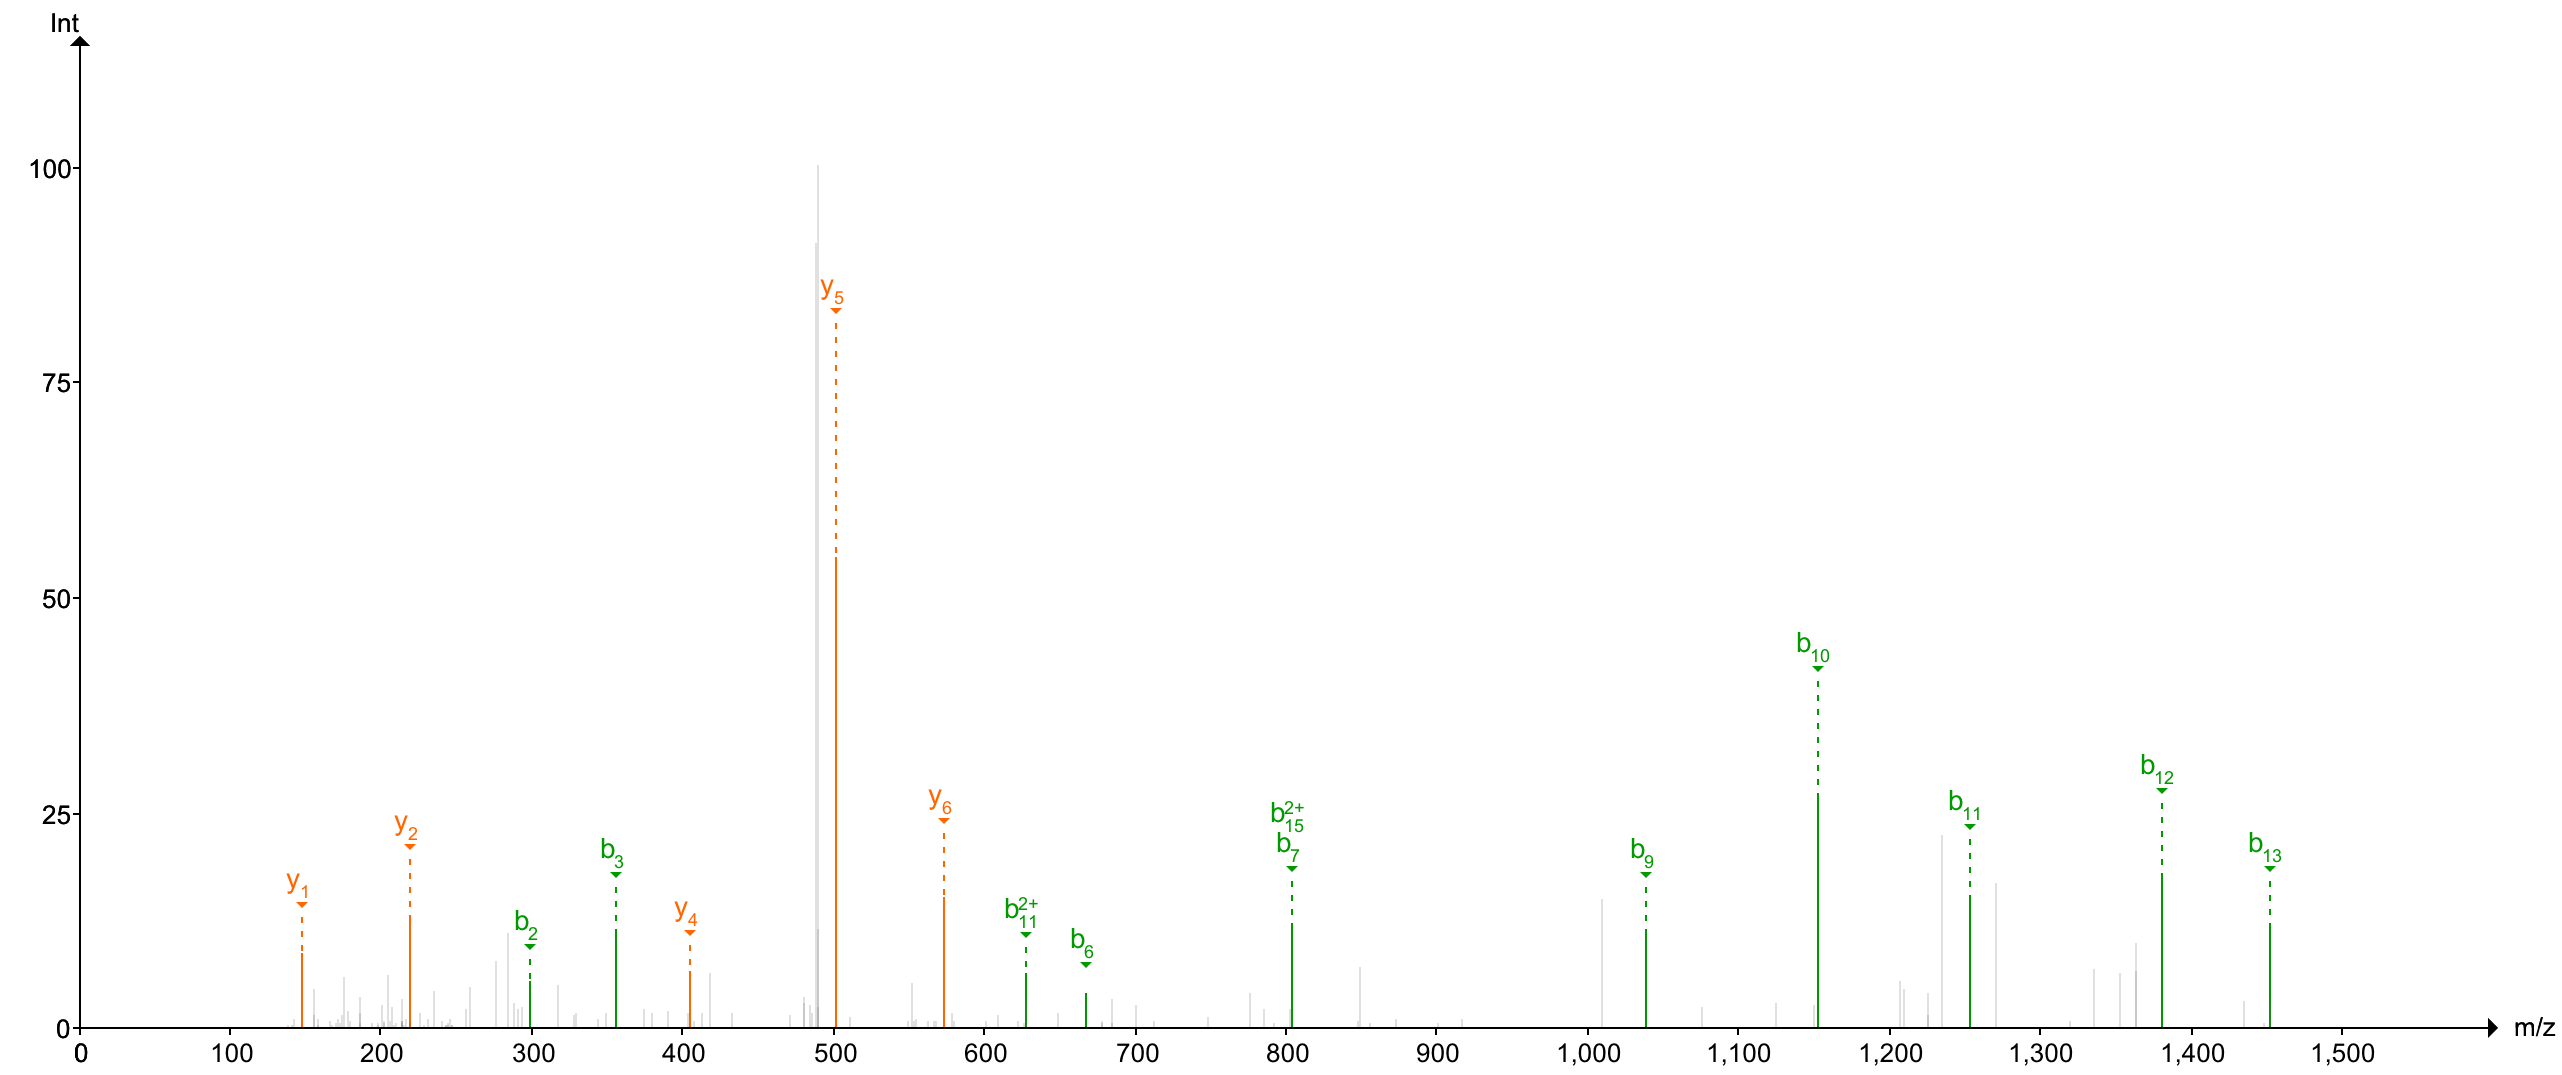

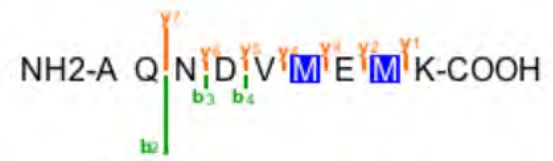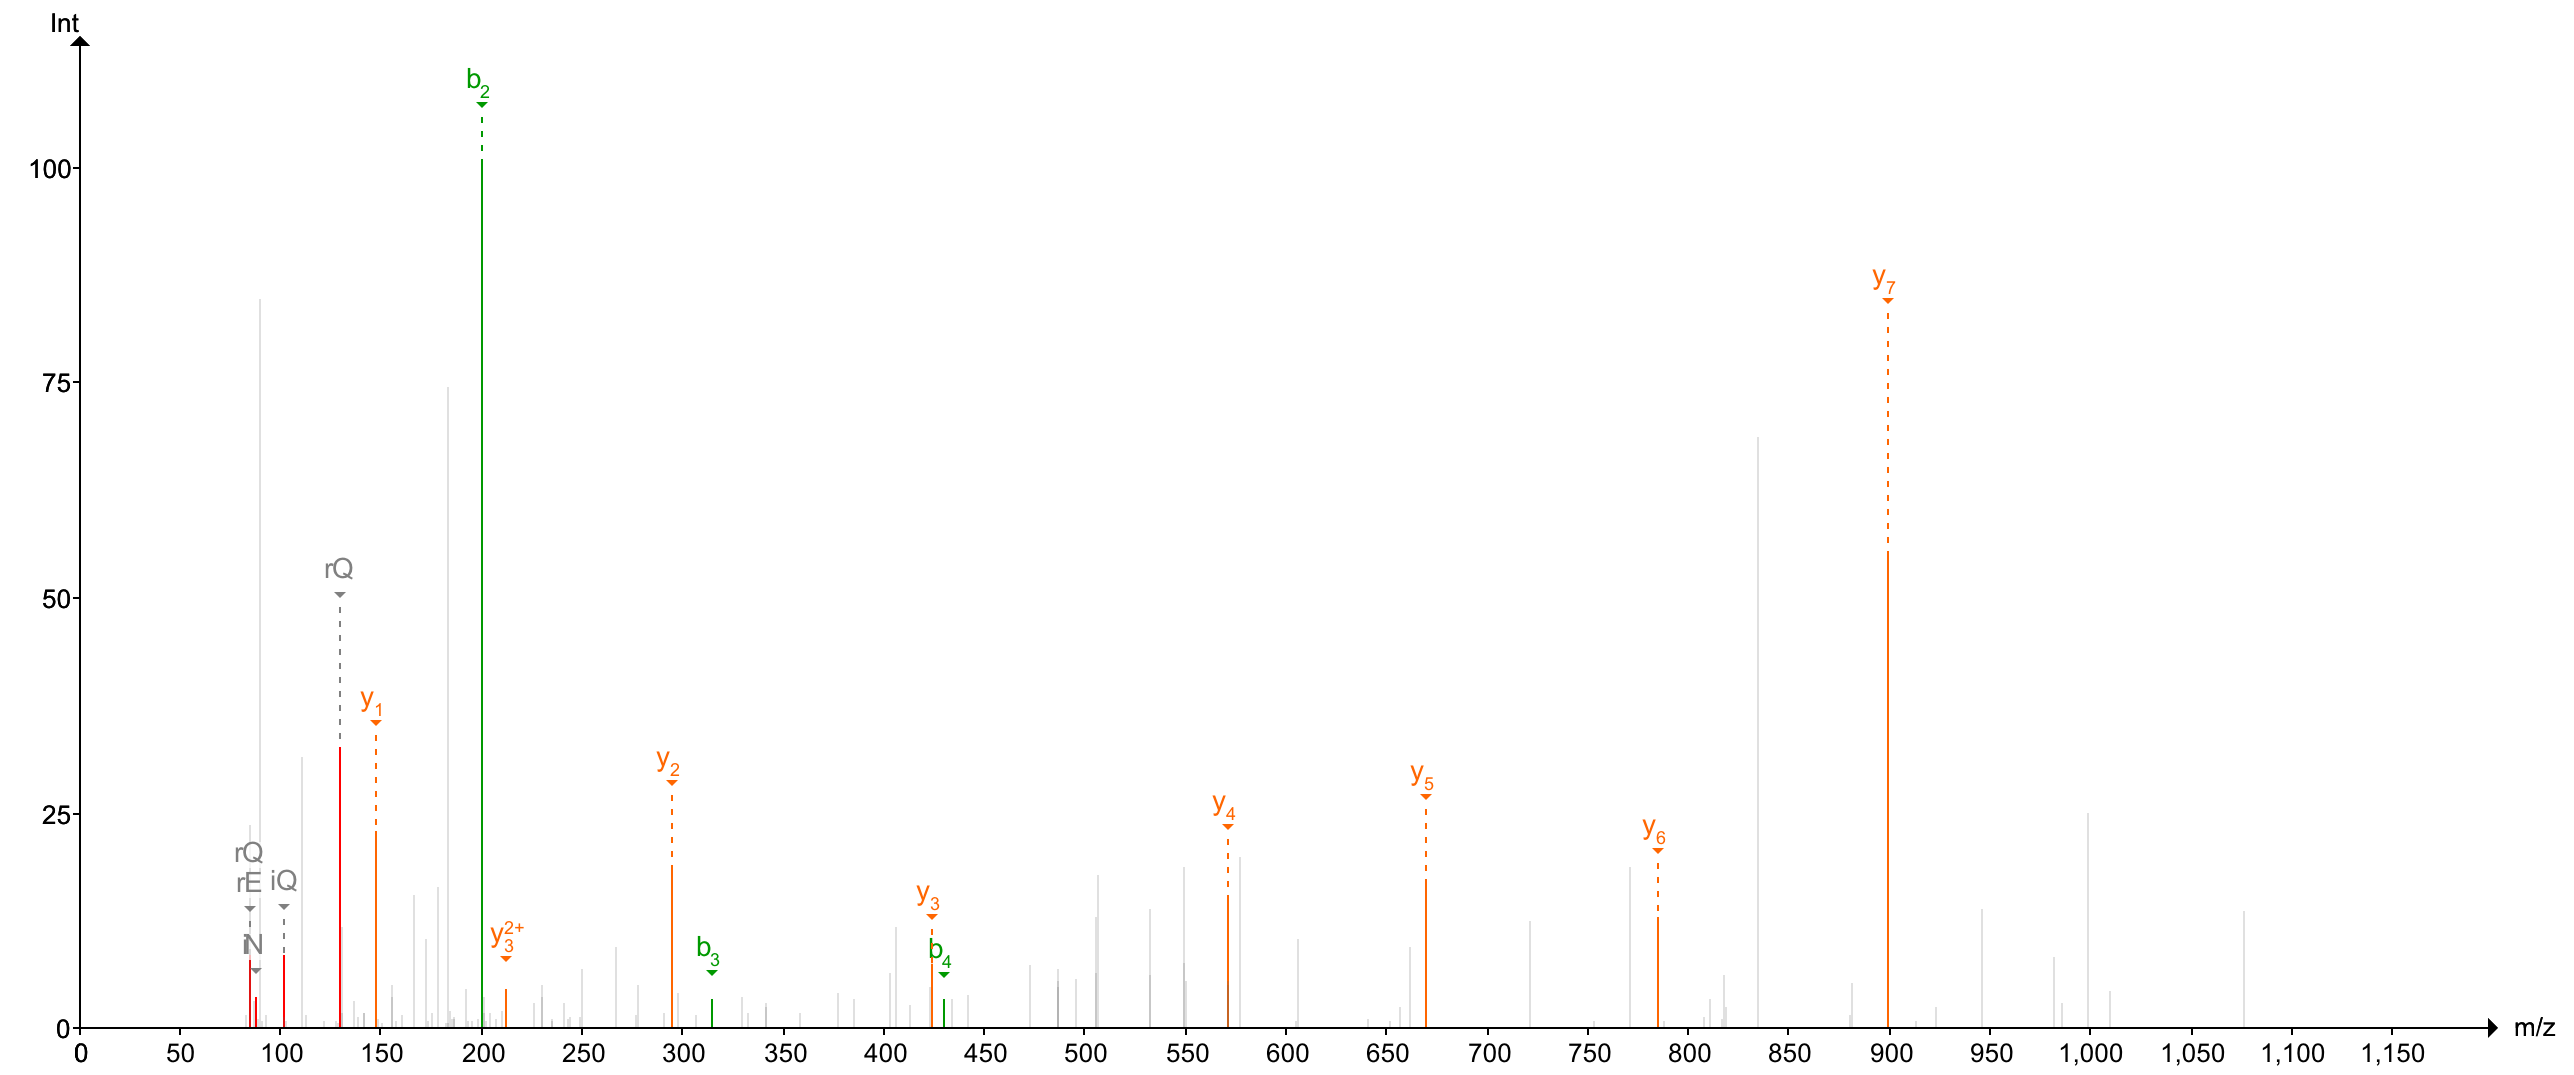

NH<sub>2</sub>-Q D E L V I S A R-COOH

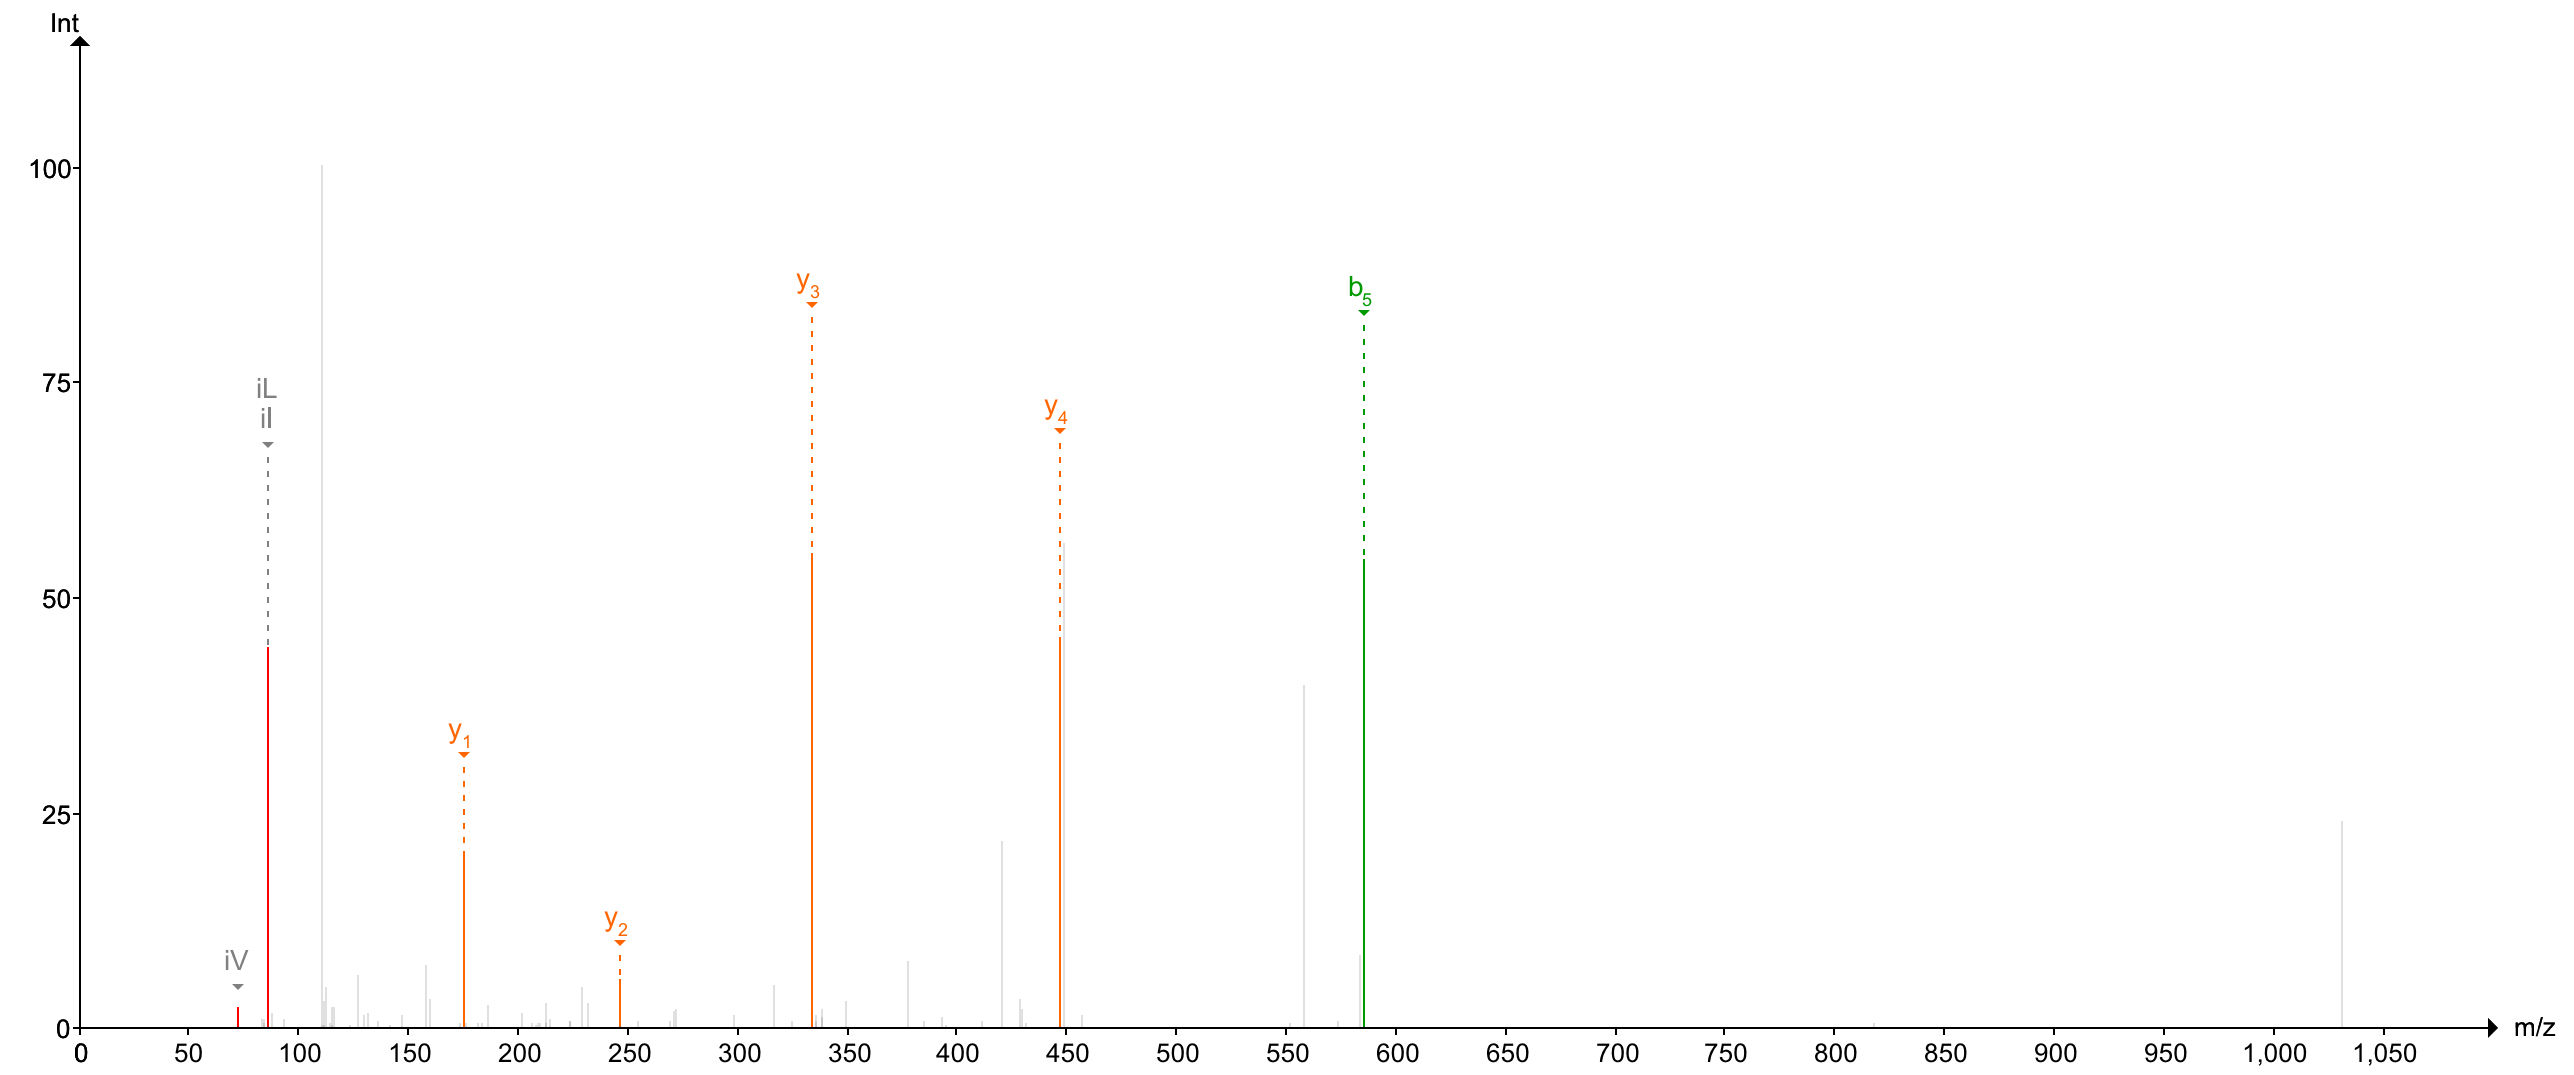



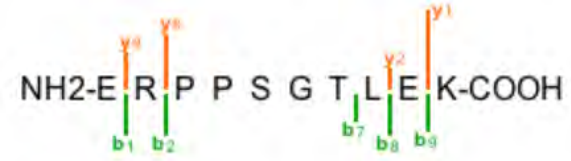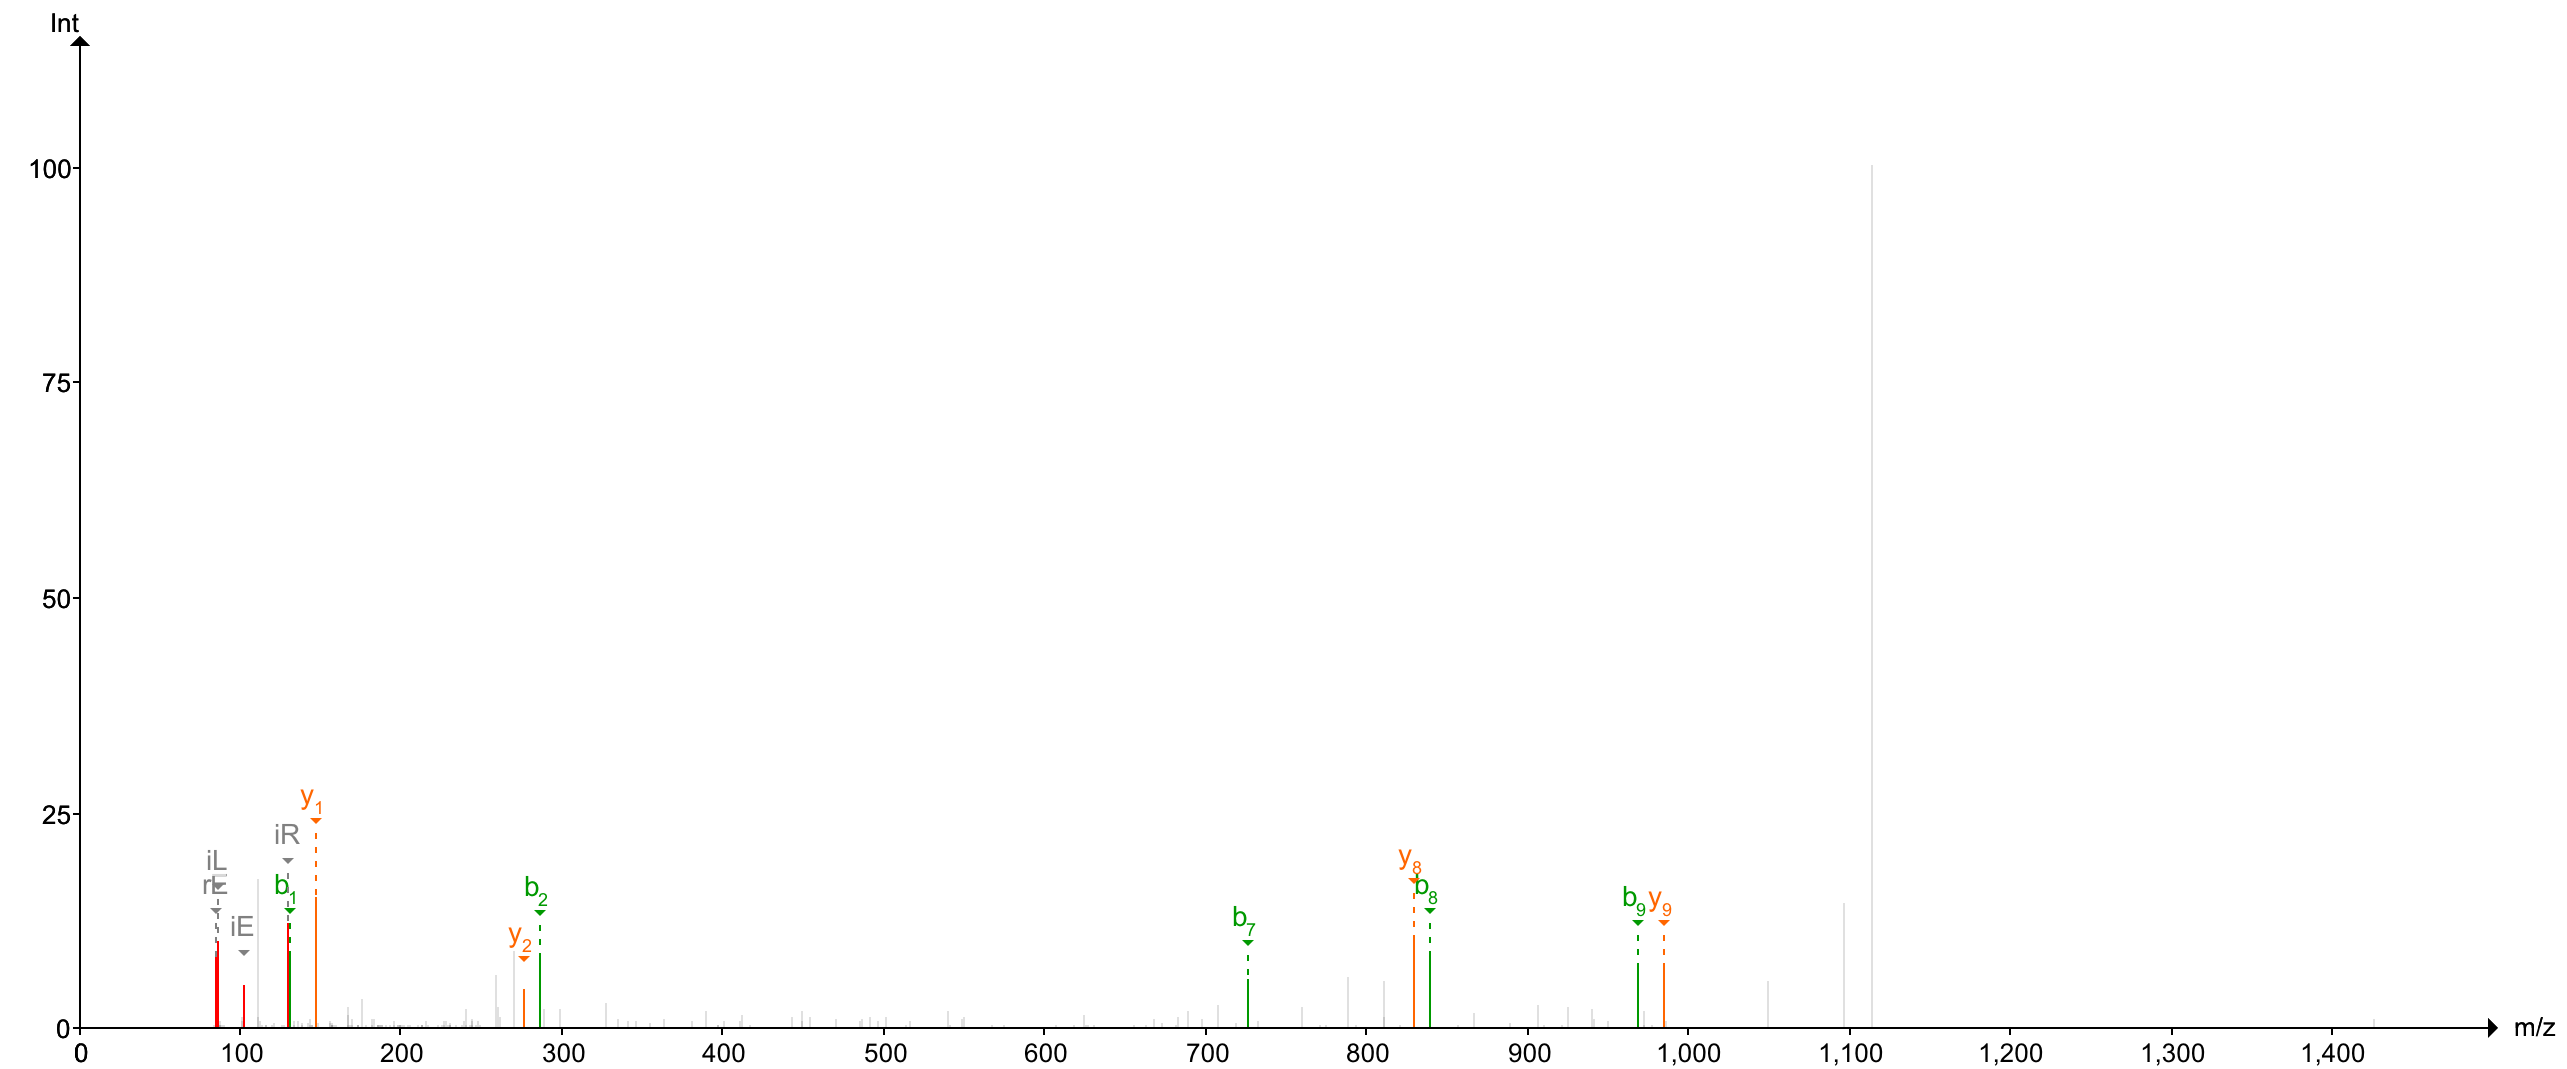

NH<sub>2</sub>-P<sup>y<sub>9</sub></sup>S<sup>y<sub>8</sub></sup>V<sup>y<sub>7</sub></sup>A<sup>y<sub>1</sub></sup>P A T G S<sup>y<sub>1</sub></sup>K-COOH  
b<sub>2</sub> b<sub>3</sub>

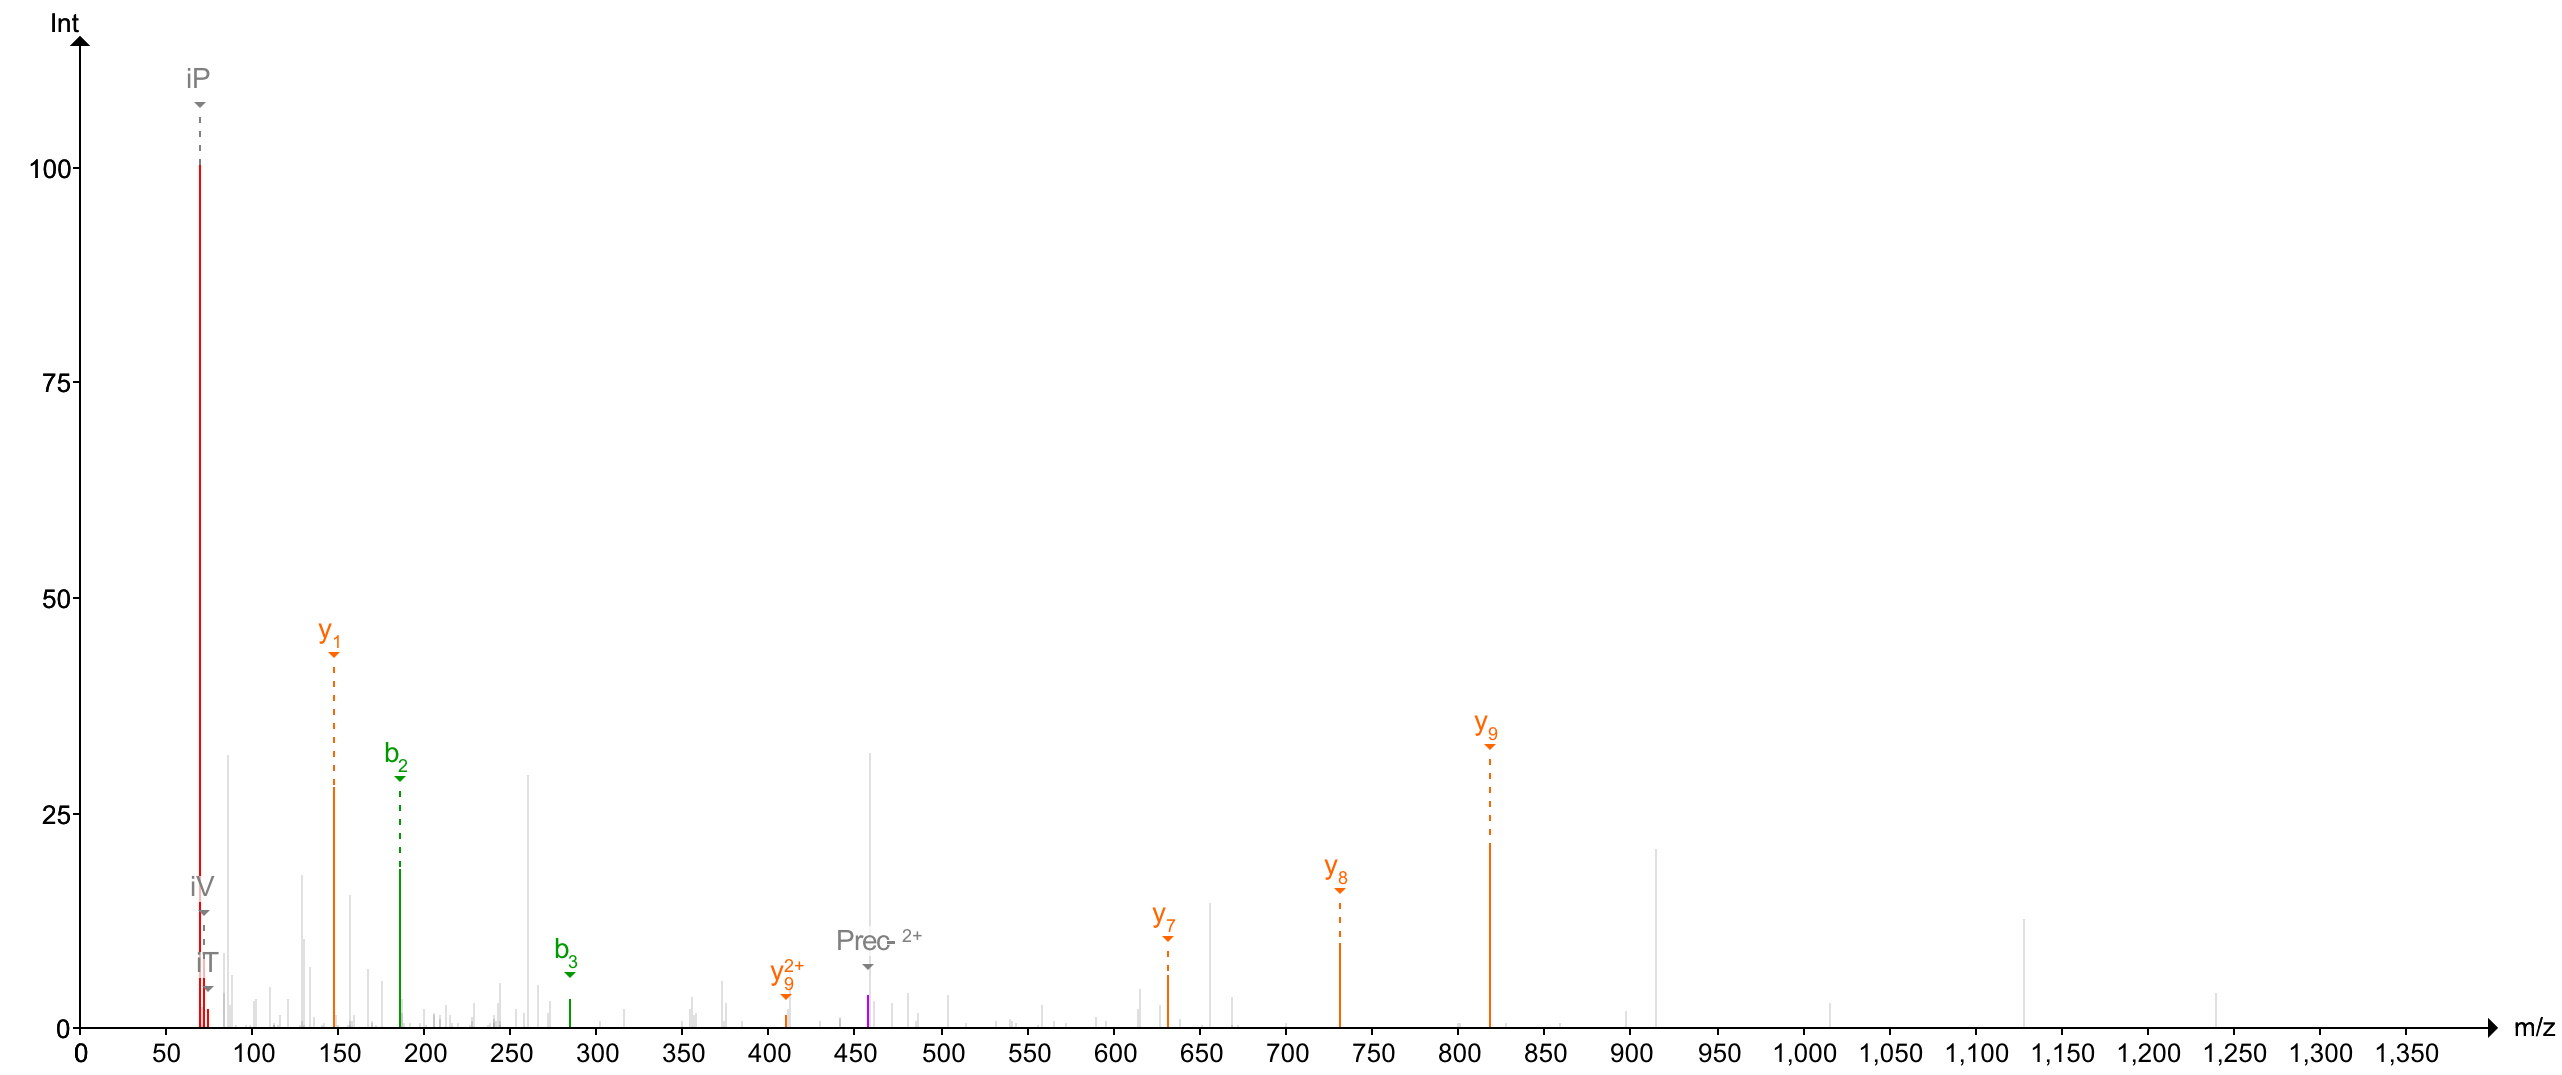

NH<sub>2</sub>-A L E P T G Q S G E A V K-COOH

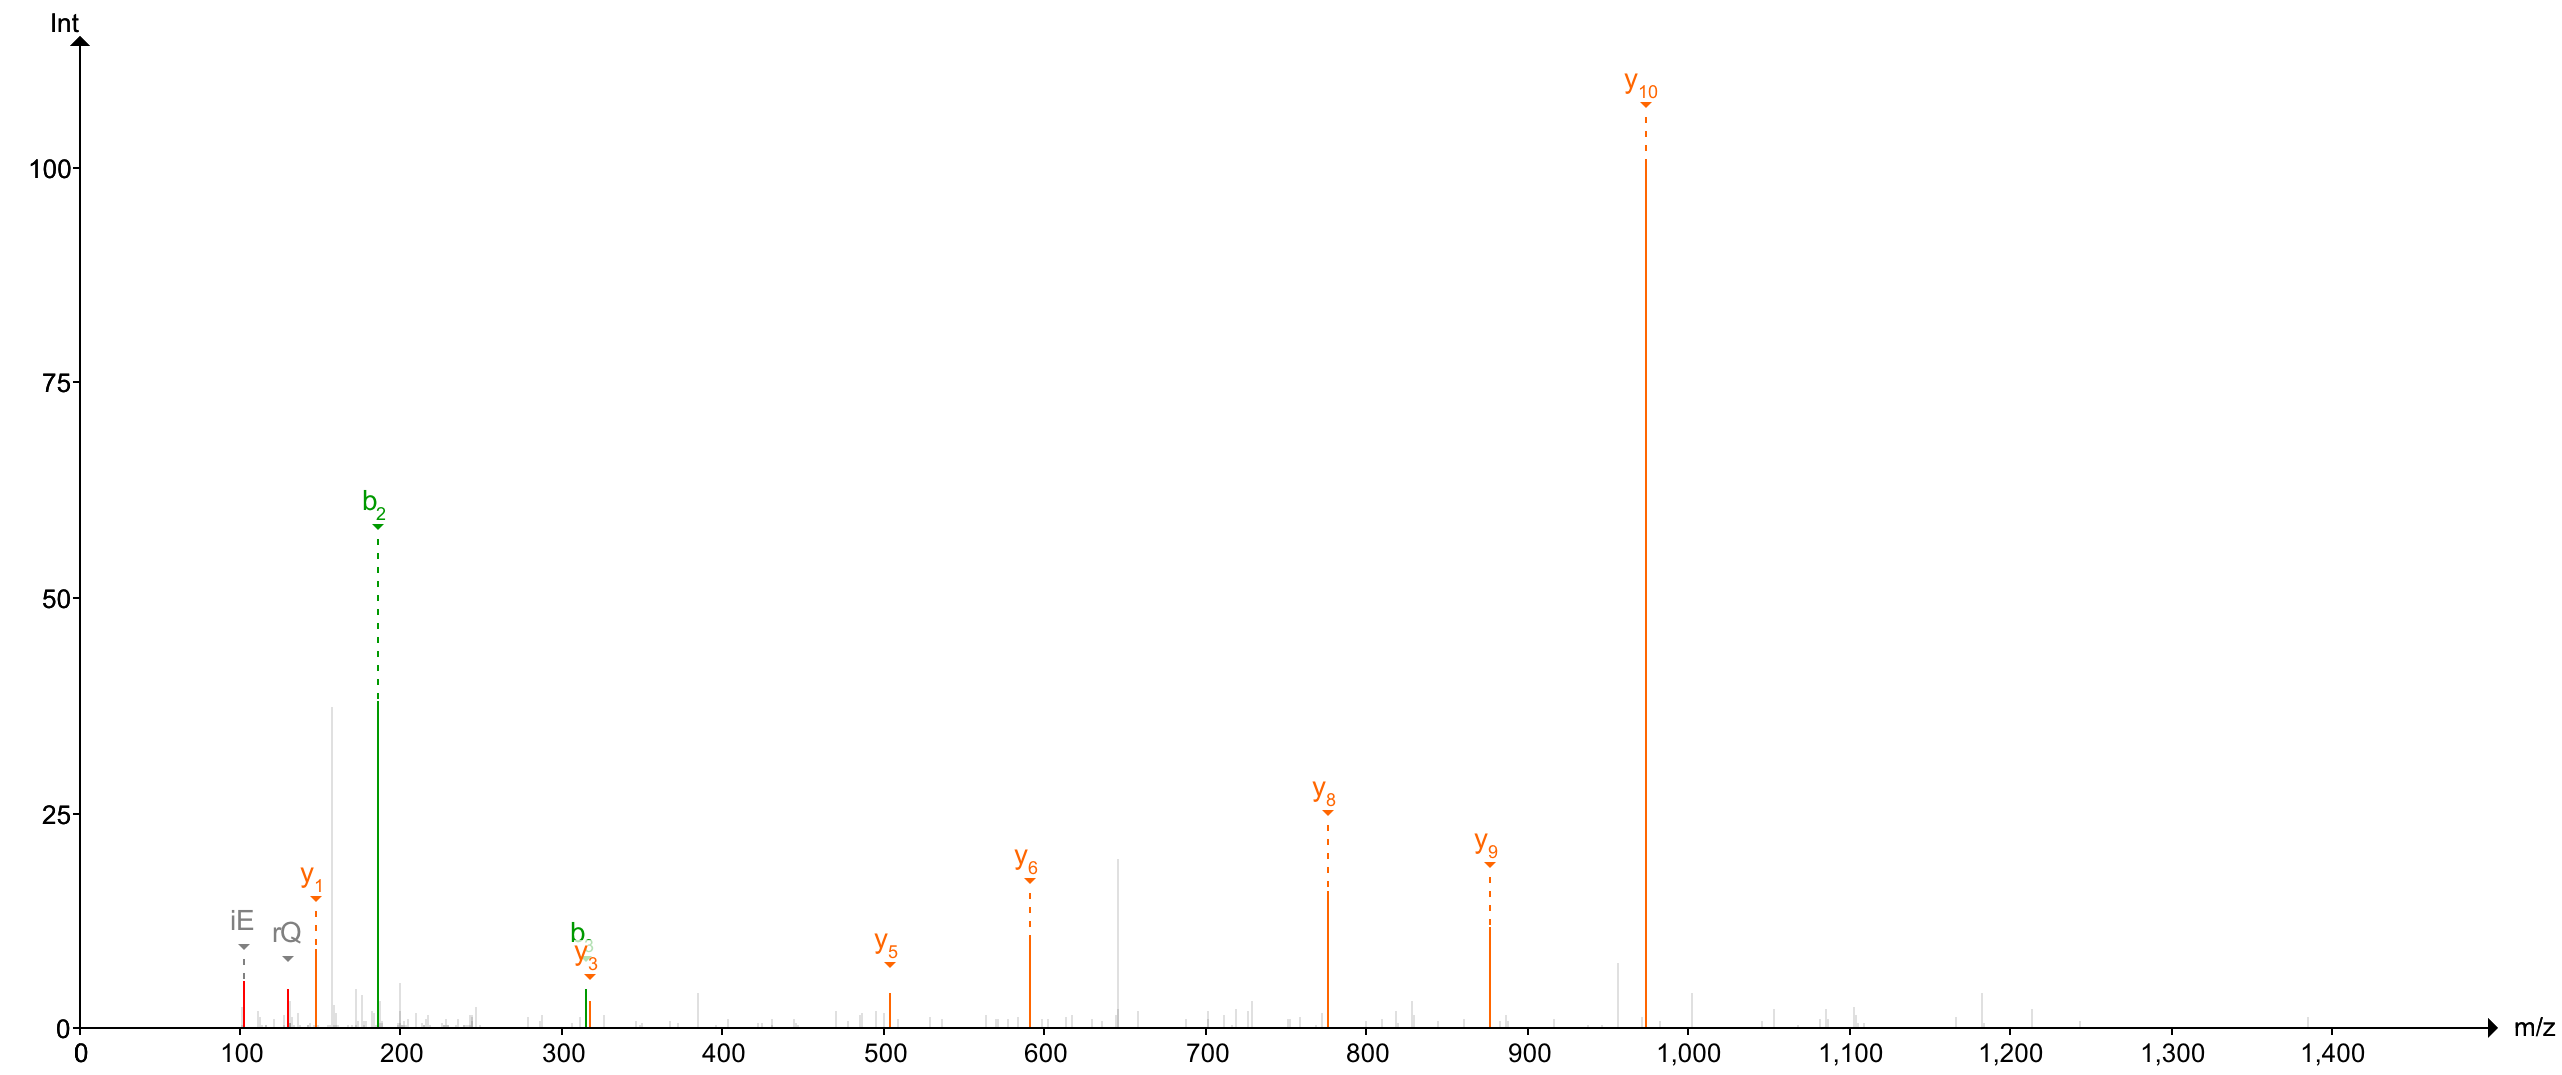

NH<sub>2</sub>-A L Q Q N G A P G I A K-COOH

b<sub>1</sub>  
b<sub>2</sub>  
b<sub>3</sub>

y<sub>9</sub>  
y<sub>8</sub>  
y<sub>7</sub>

y<sub>5</sub>

y<sub>2</sub>  
y<sub>1</sub>

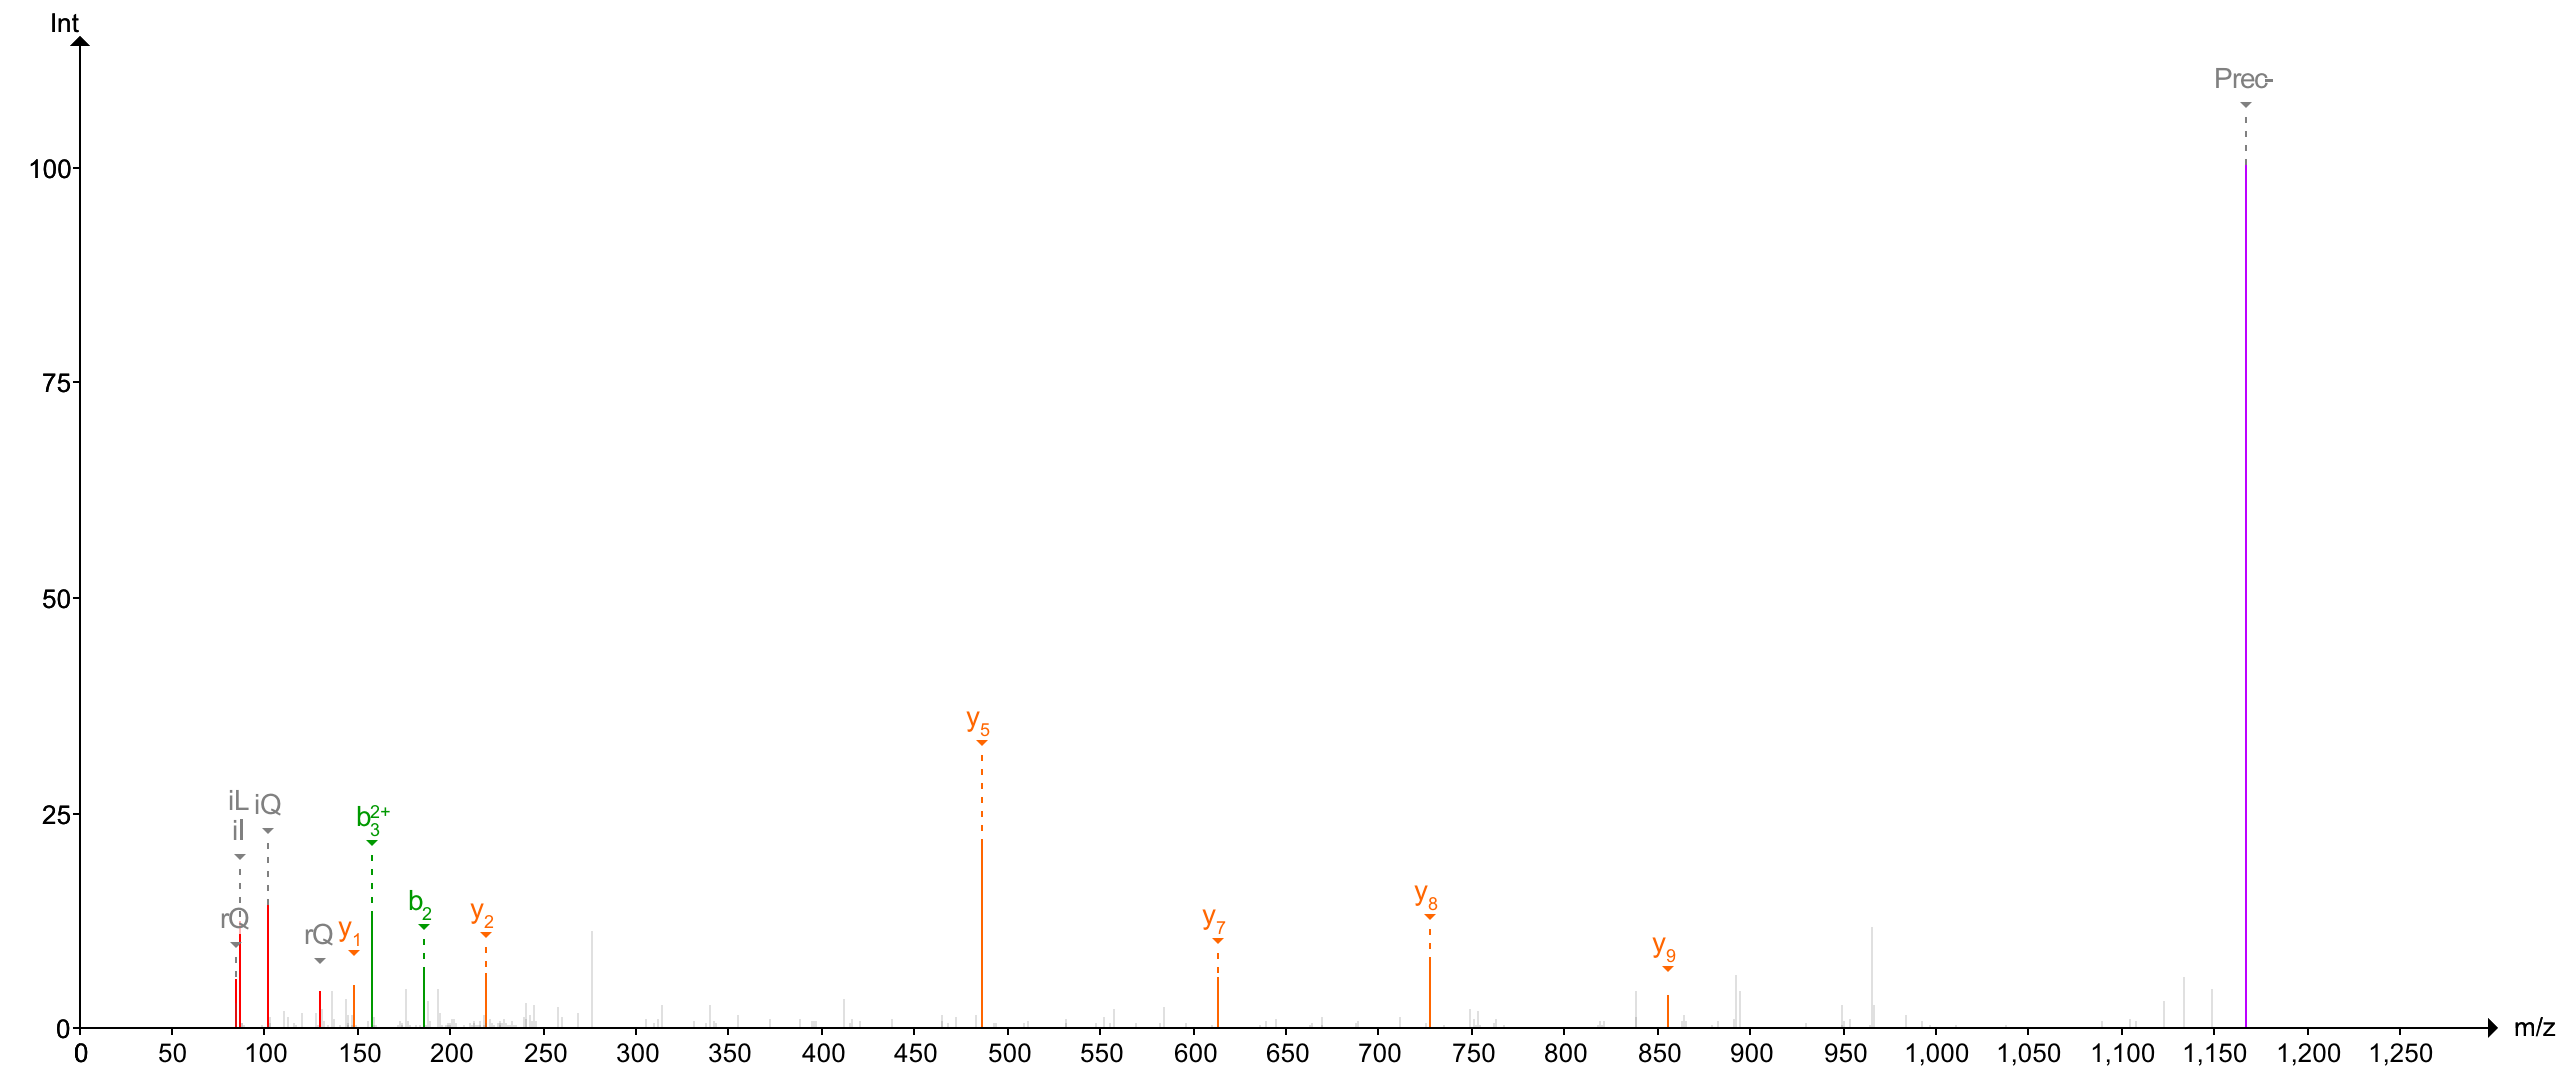

NH<sub>2</sub>-L T P E E L E R-COOH  
b<sub>2</sub> y<sub>6</sub> y<sub>5</sub> y<sub>4</sub> y<sub>3</sub> y<sub>1</sub> y<sub>1</sub>

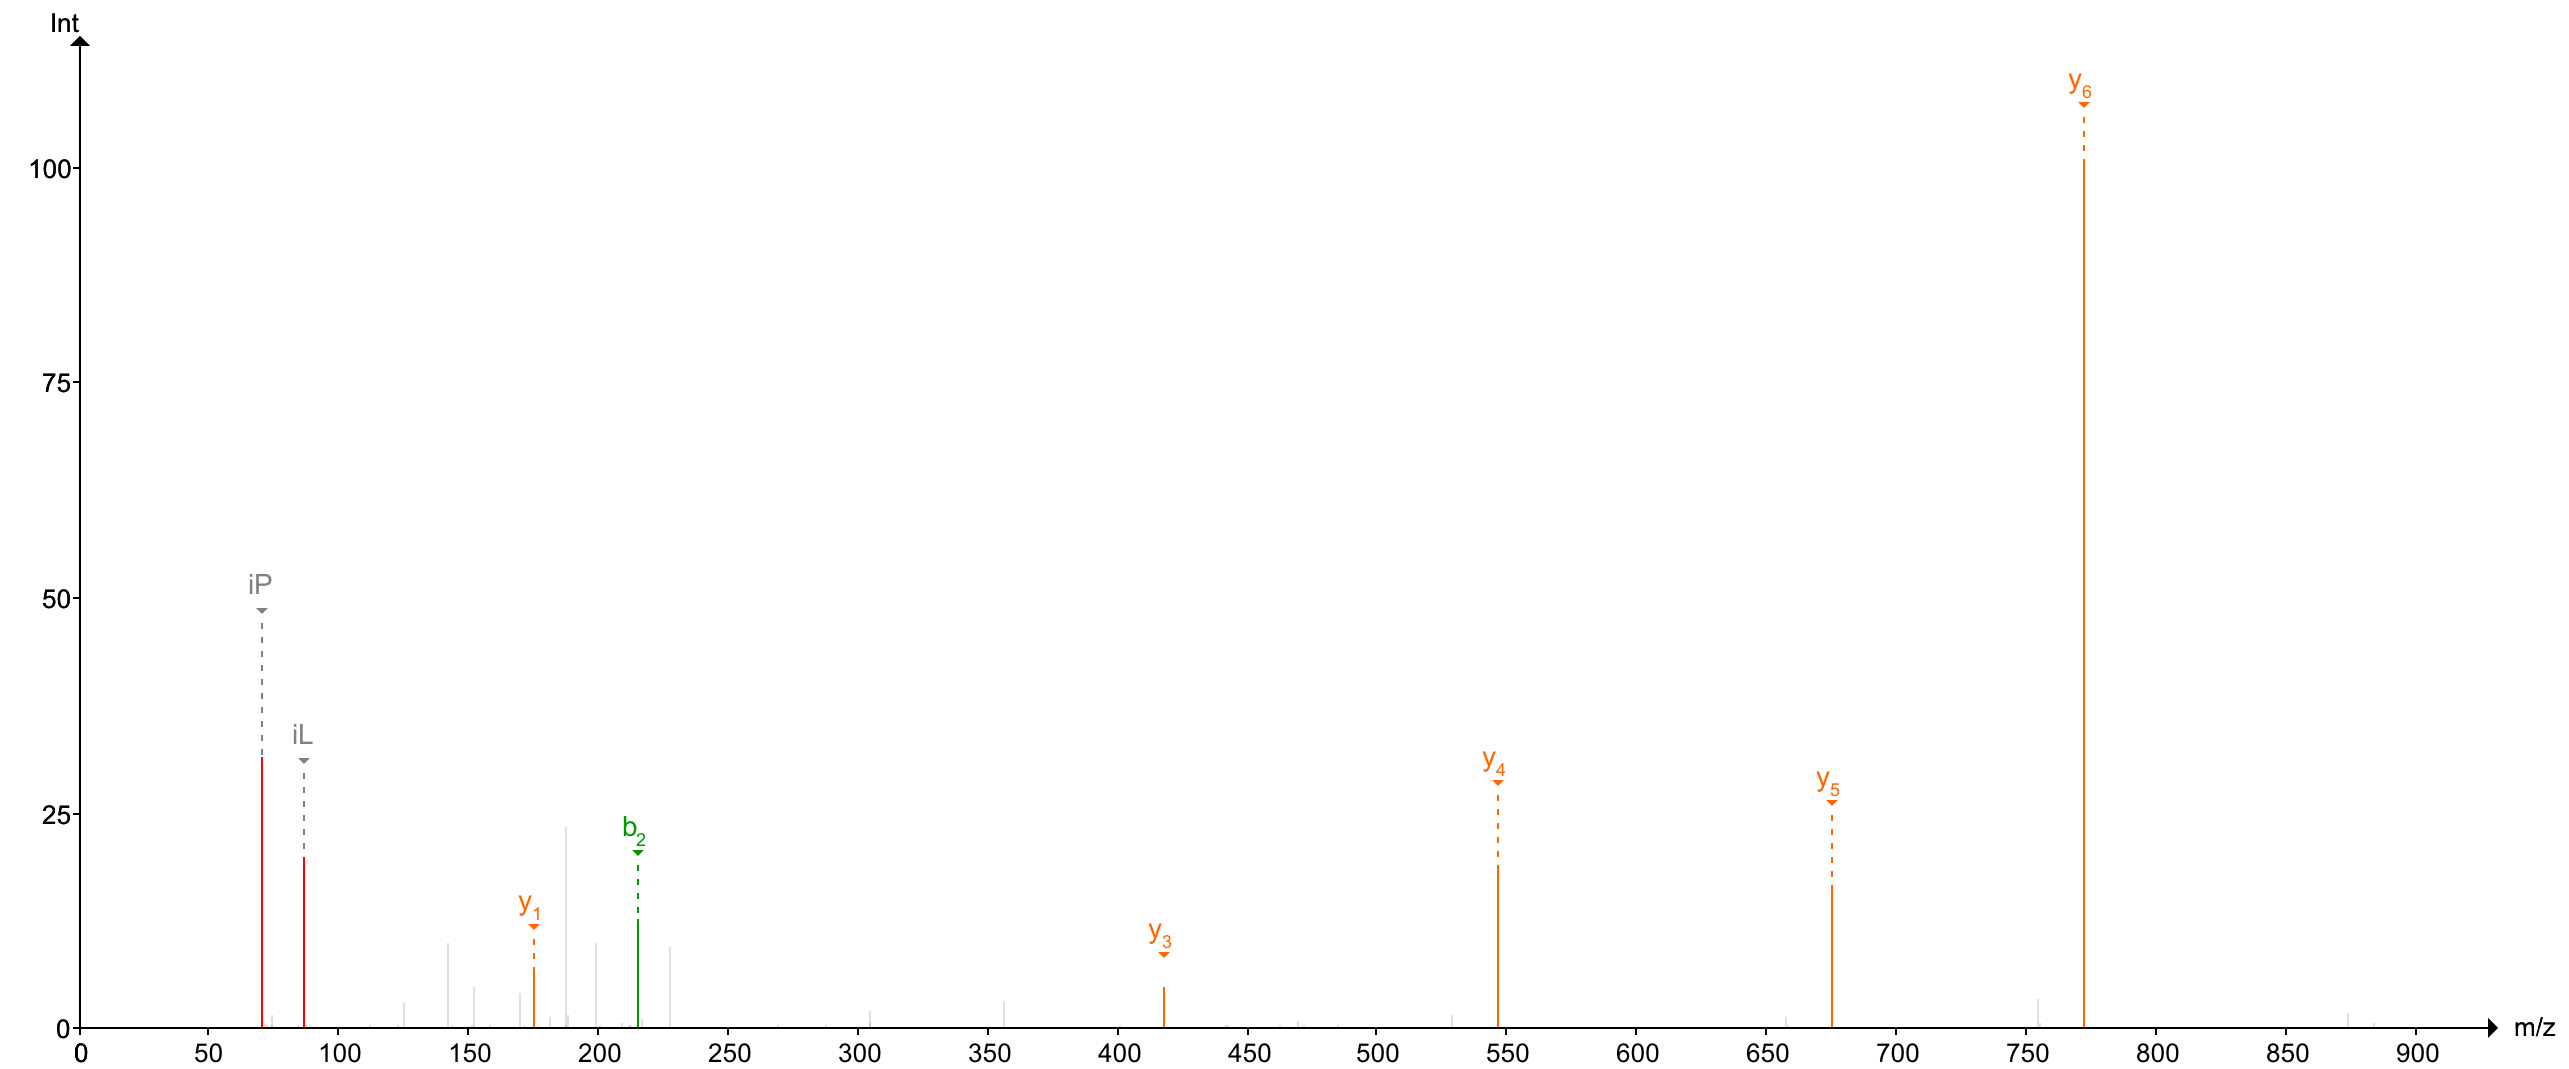

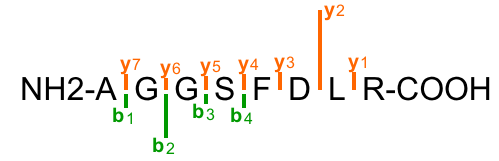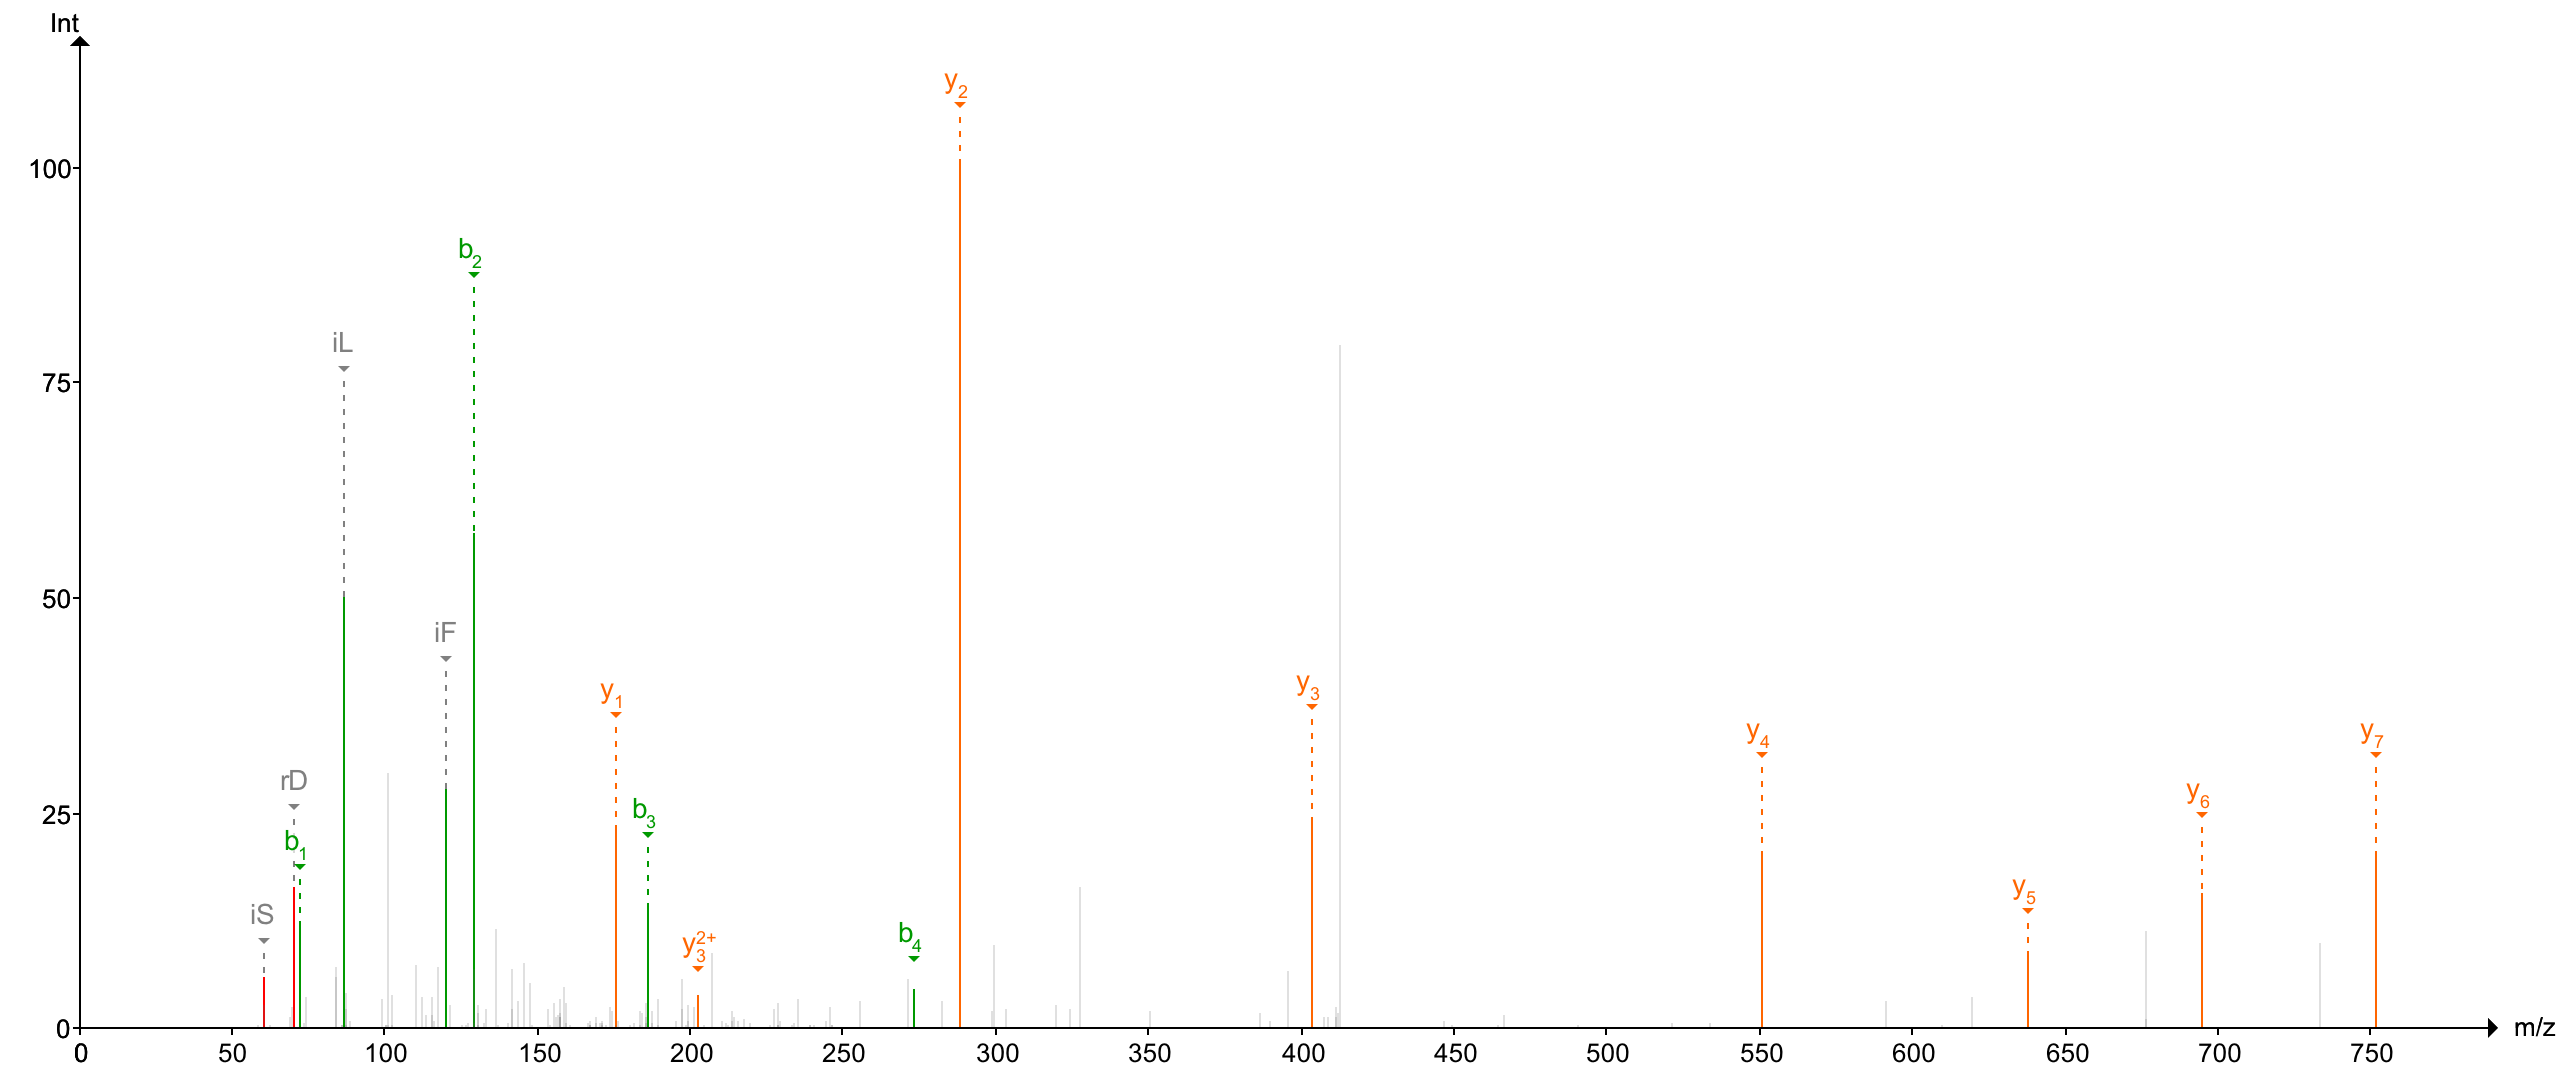

NH<sub>2</sub>-S G T G I A A M S V M R P E Q I M K-COOH

y<sup>13</sup> y<sup>12</sup> y<sup>10</sup>  
b<sub>4</sub> b<sub>5</sub> b<sub>15</sub> b<sub>16</sub> b<sub>17</sub>

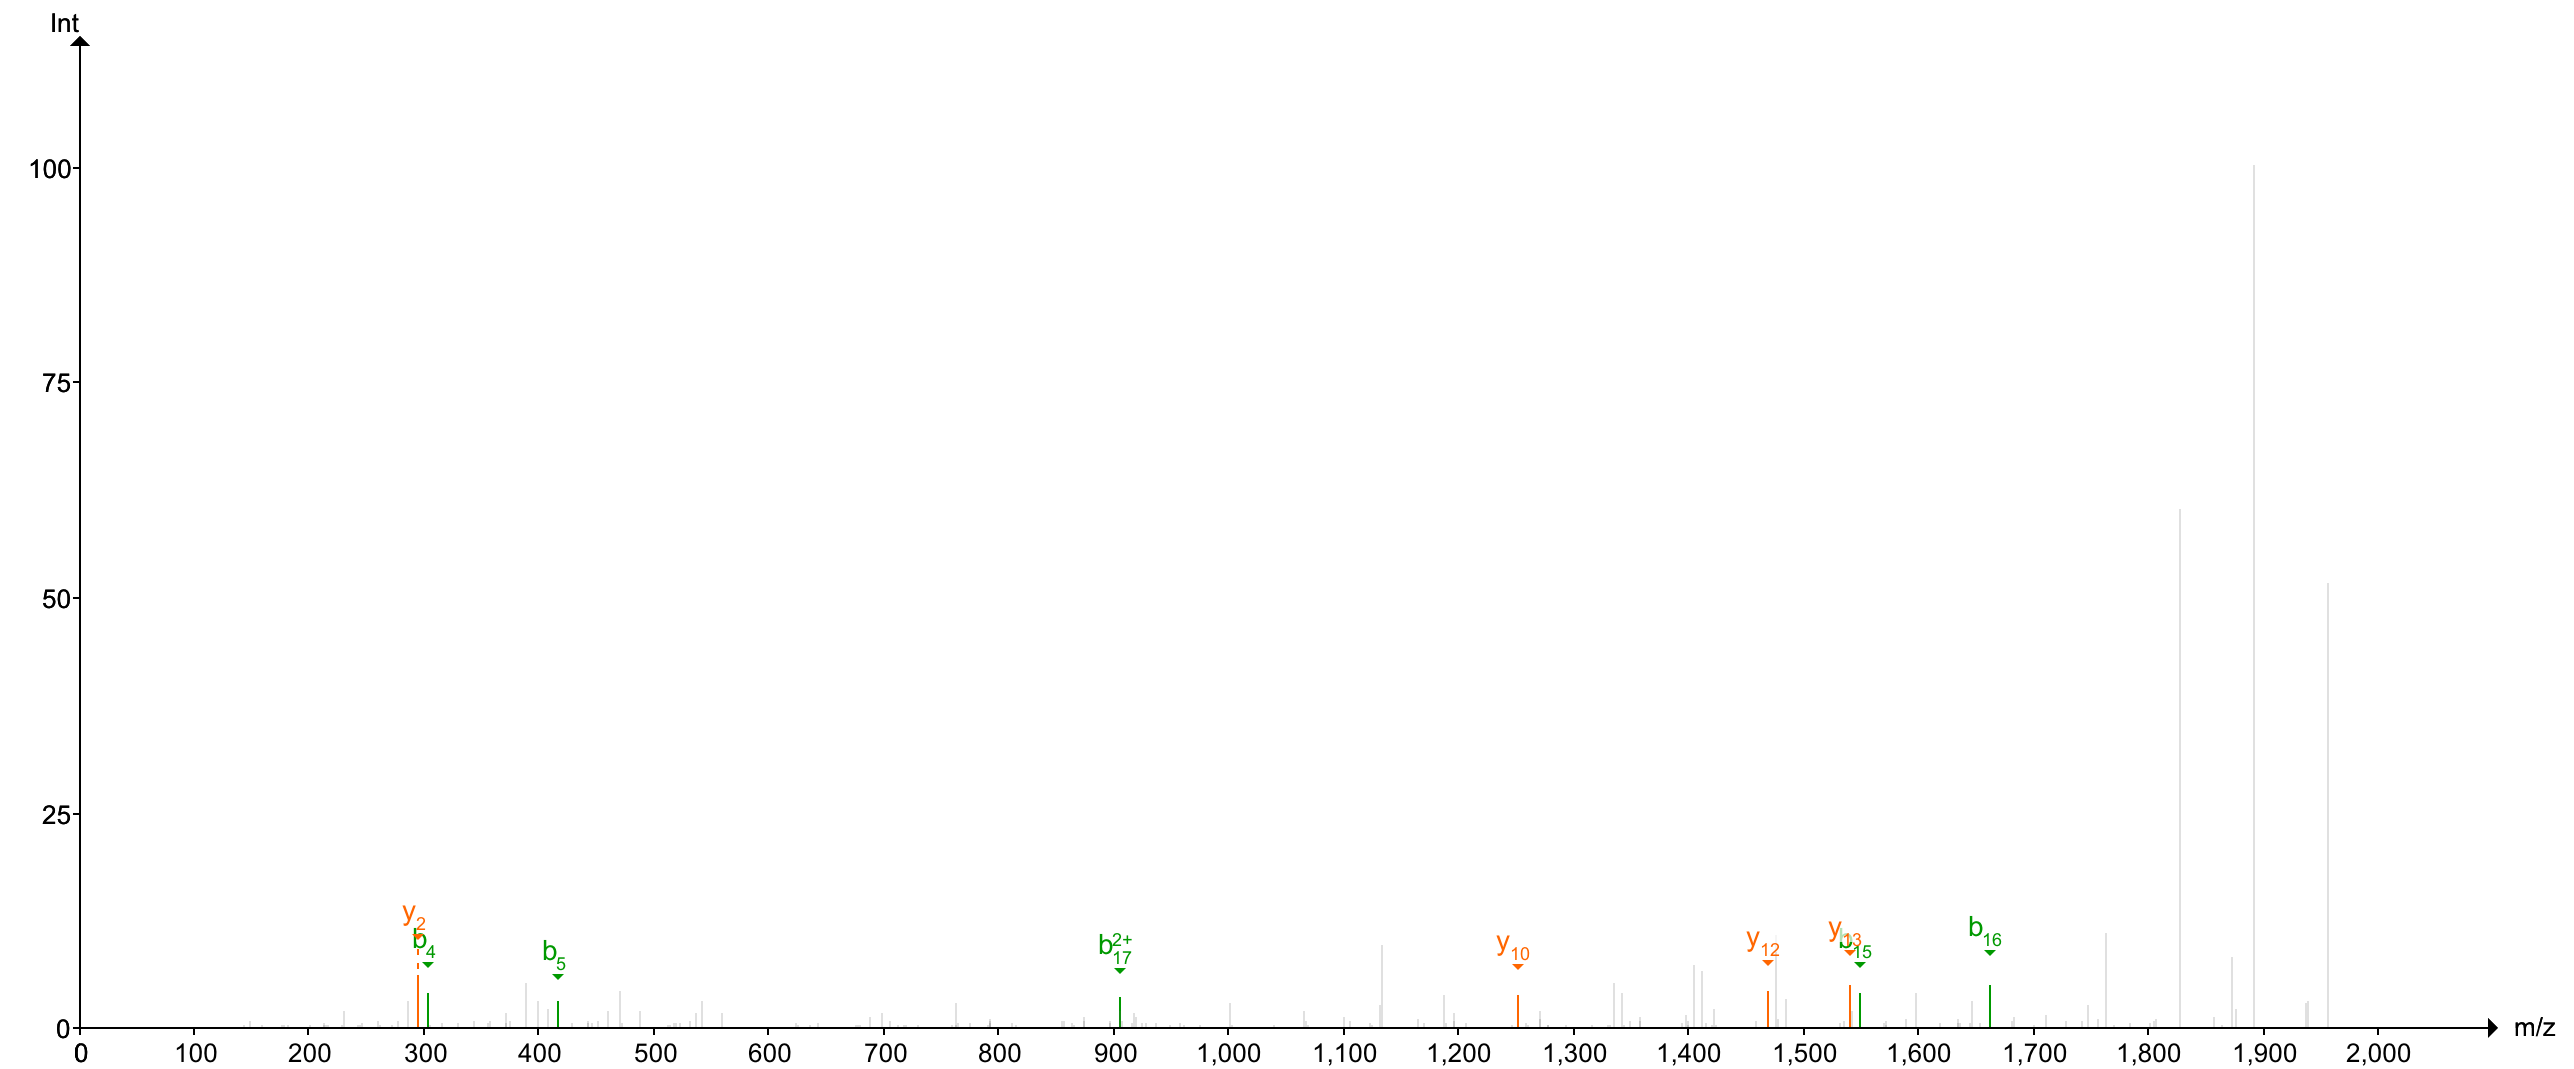

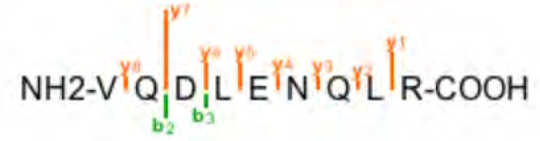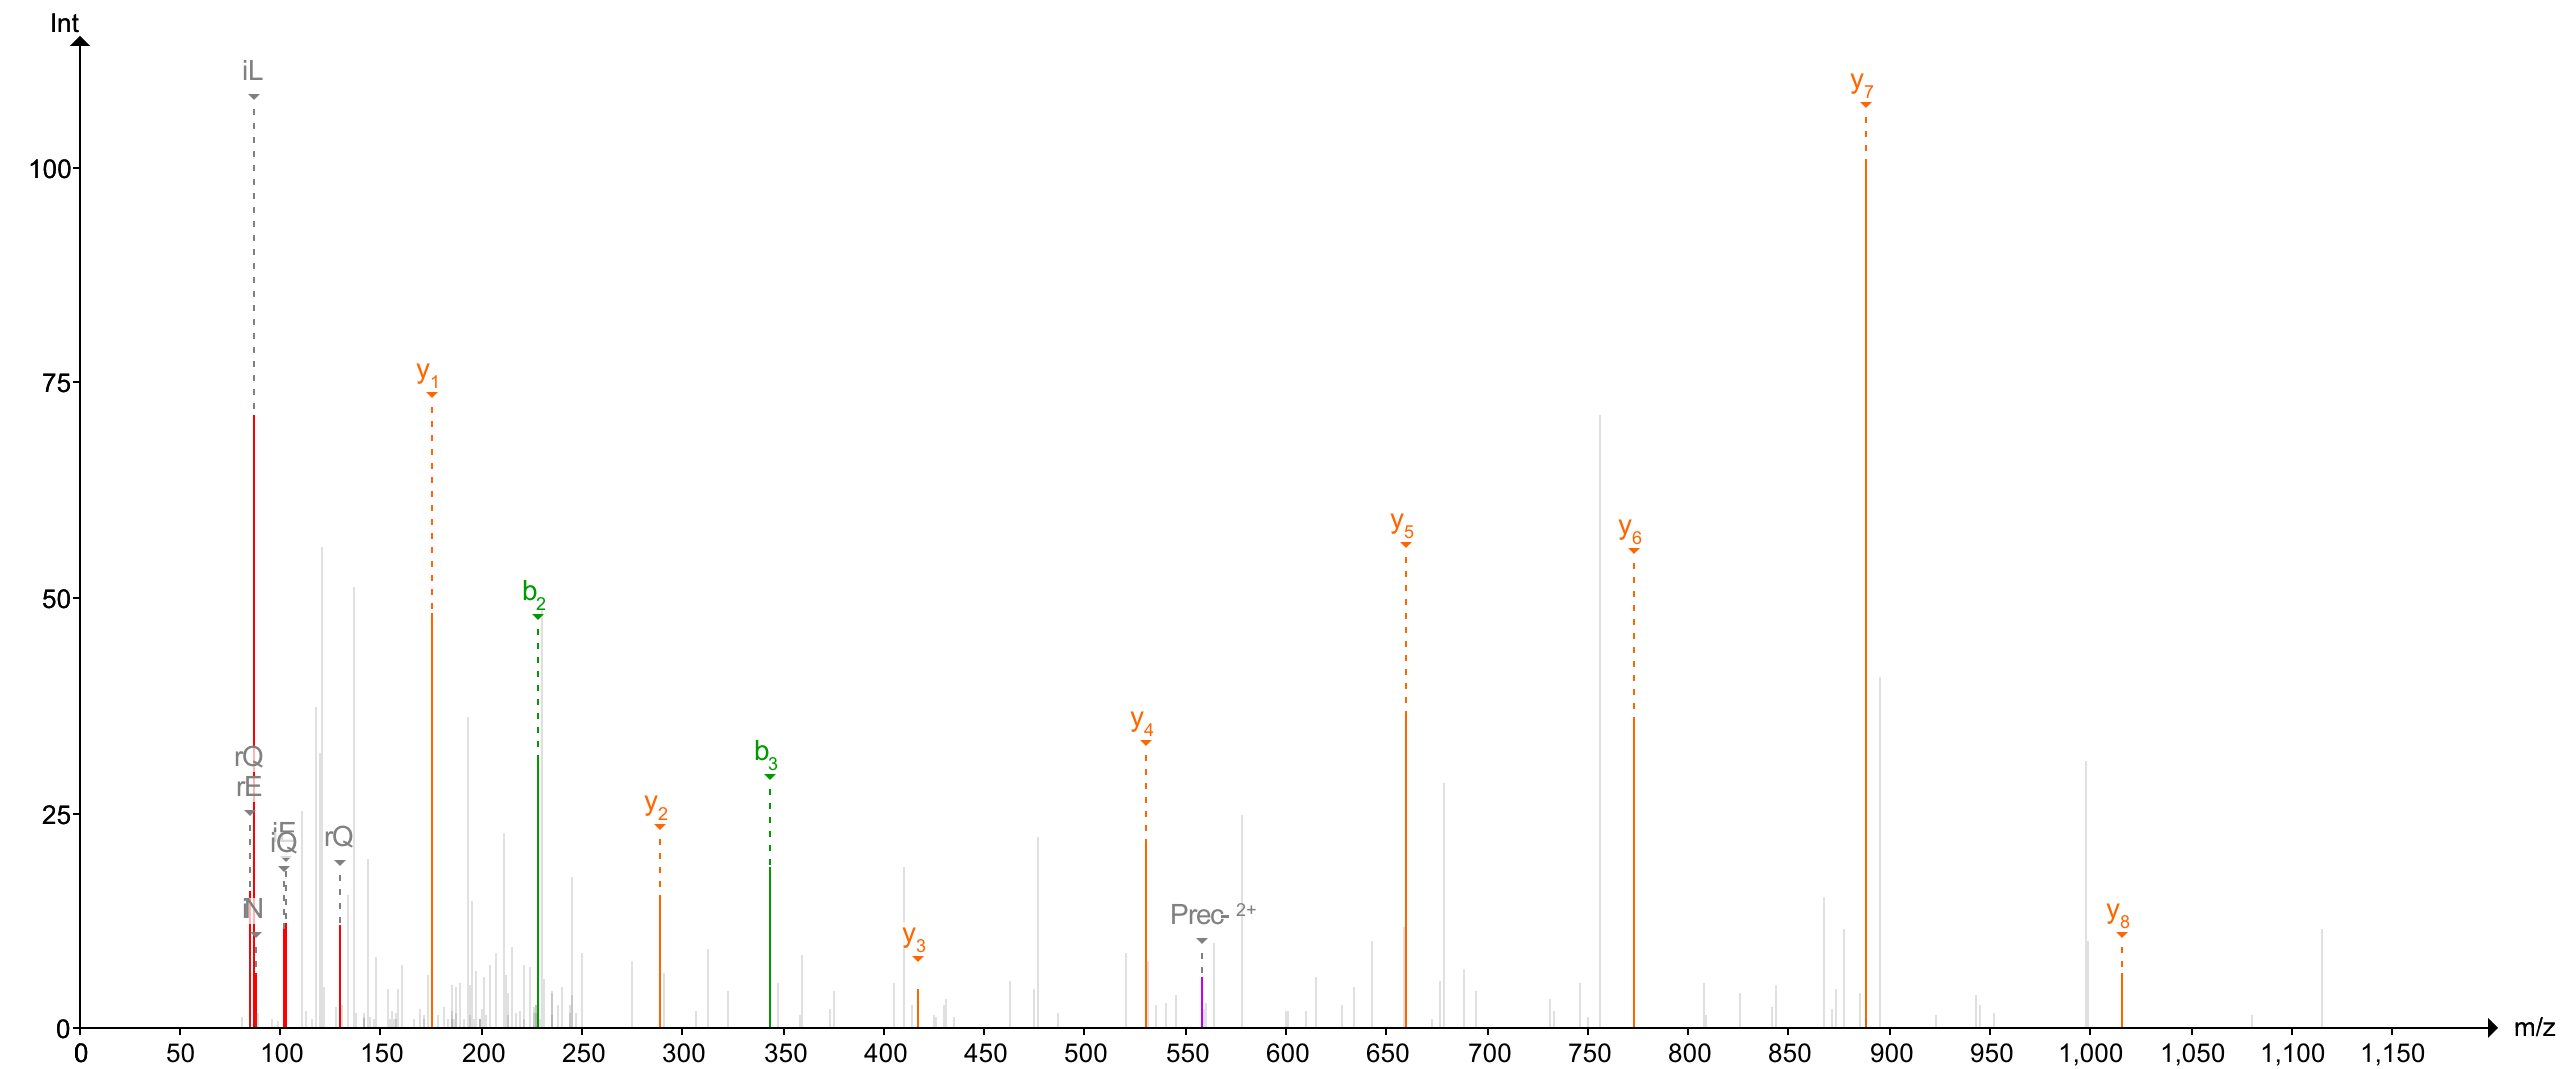



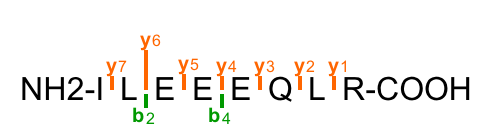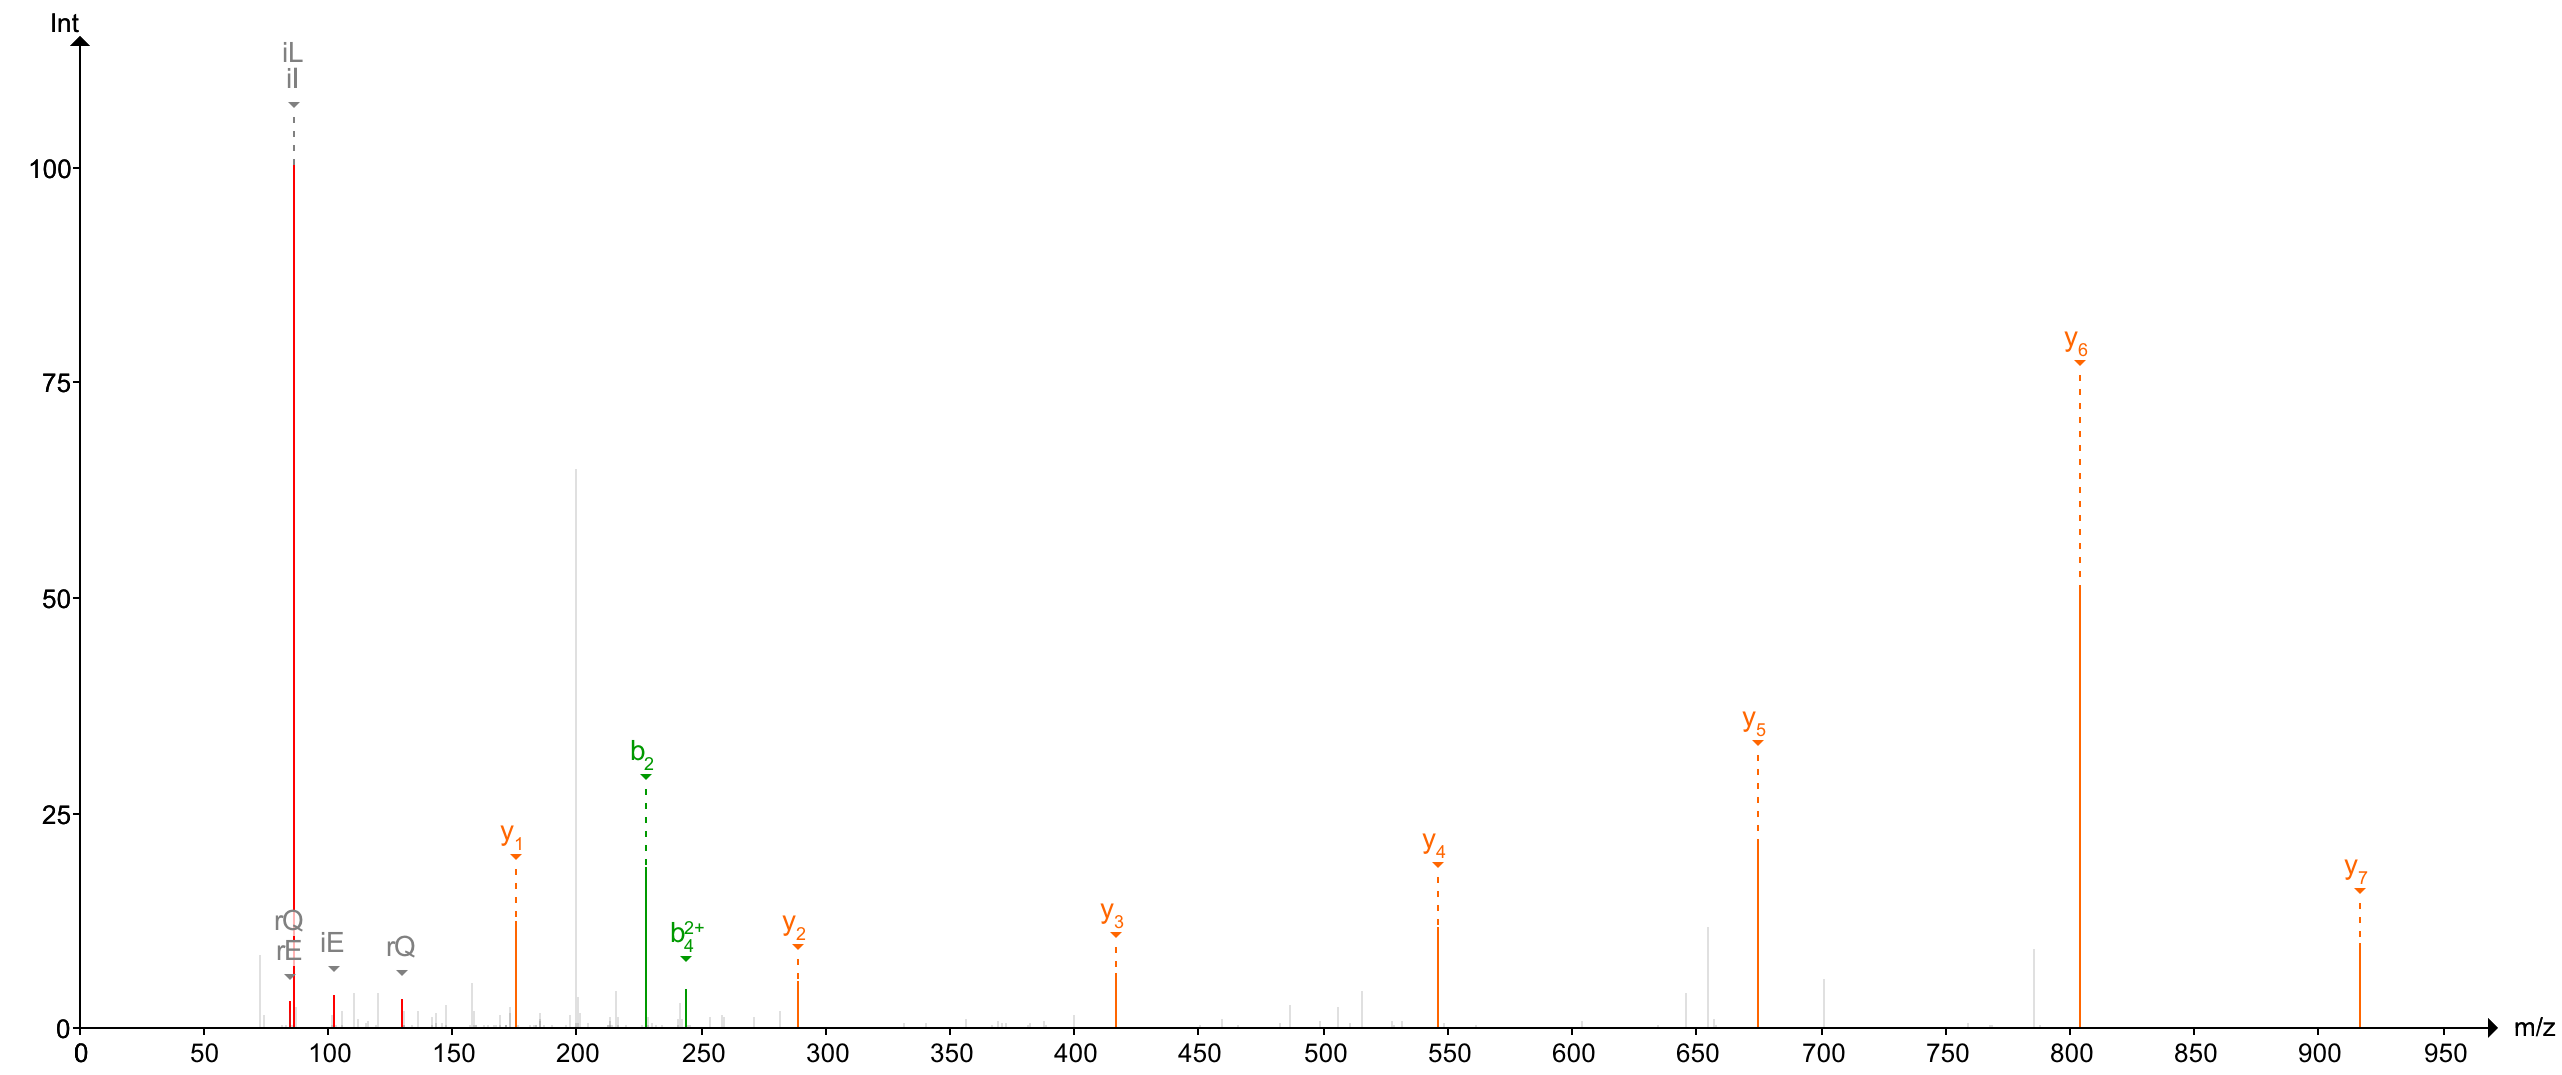

NH<sub>2</sub>-I<sup>y<sub>8</sub></sup>S<sup>y<sub>7</sub></sup>I<sup>y<sub>6</sub></sup>Q<sup>y<sub>5</sub></sup>L<sup>y<sub>4</sub></sup>Q<sup>y<sub>3</sub></sup>A<sup>y<sub>2</sub></sup>E<sup>y<sub>1</sub></sup>L<sup>r</sup>R-COOH  
b<sub>2</sub> b<sub>3</sub>

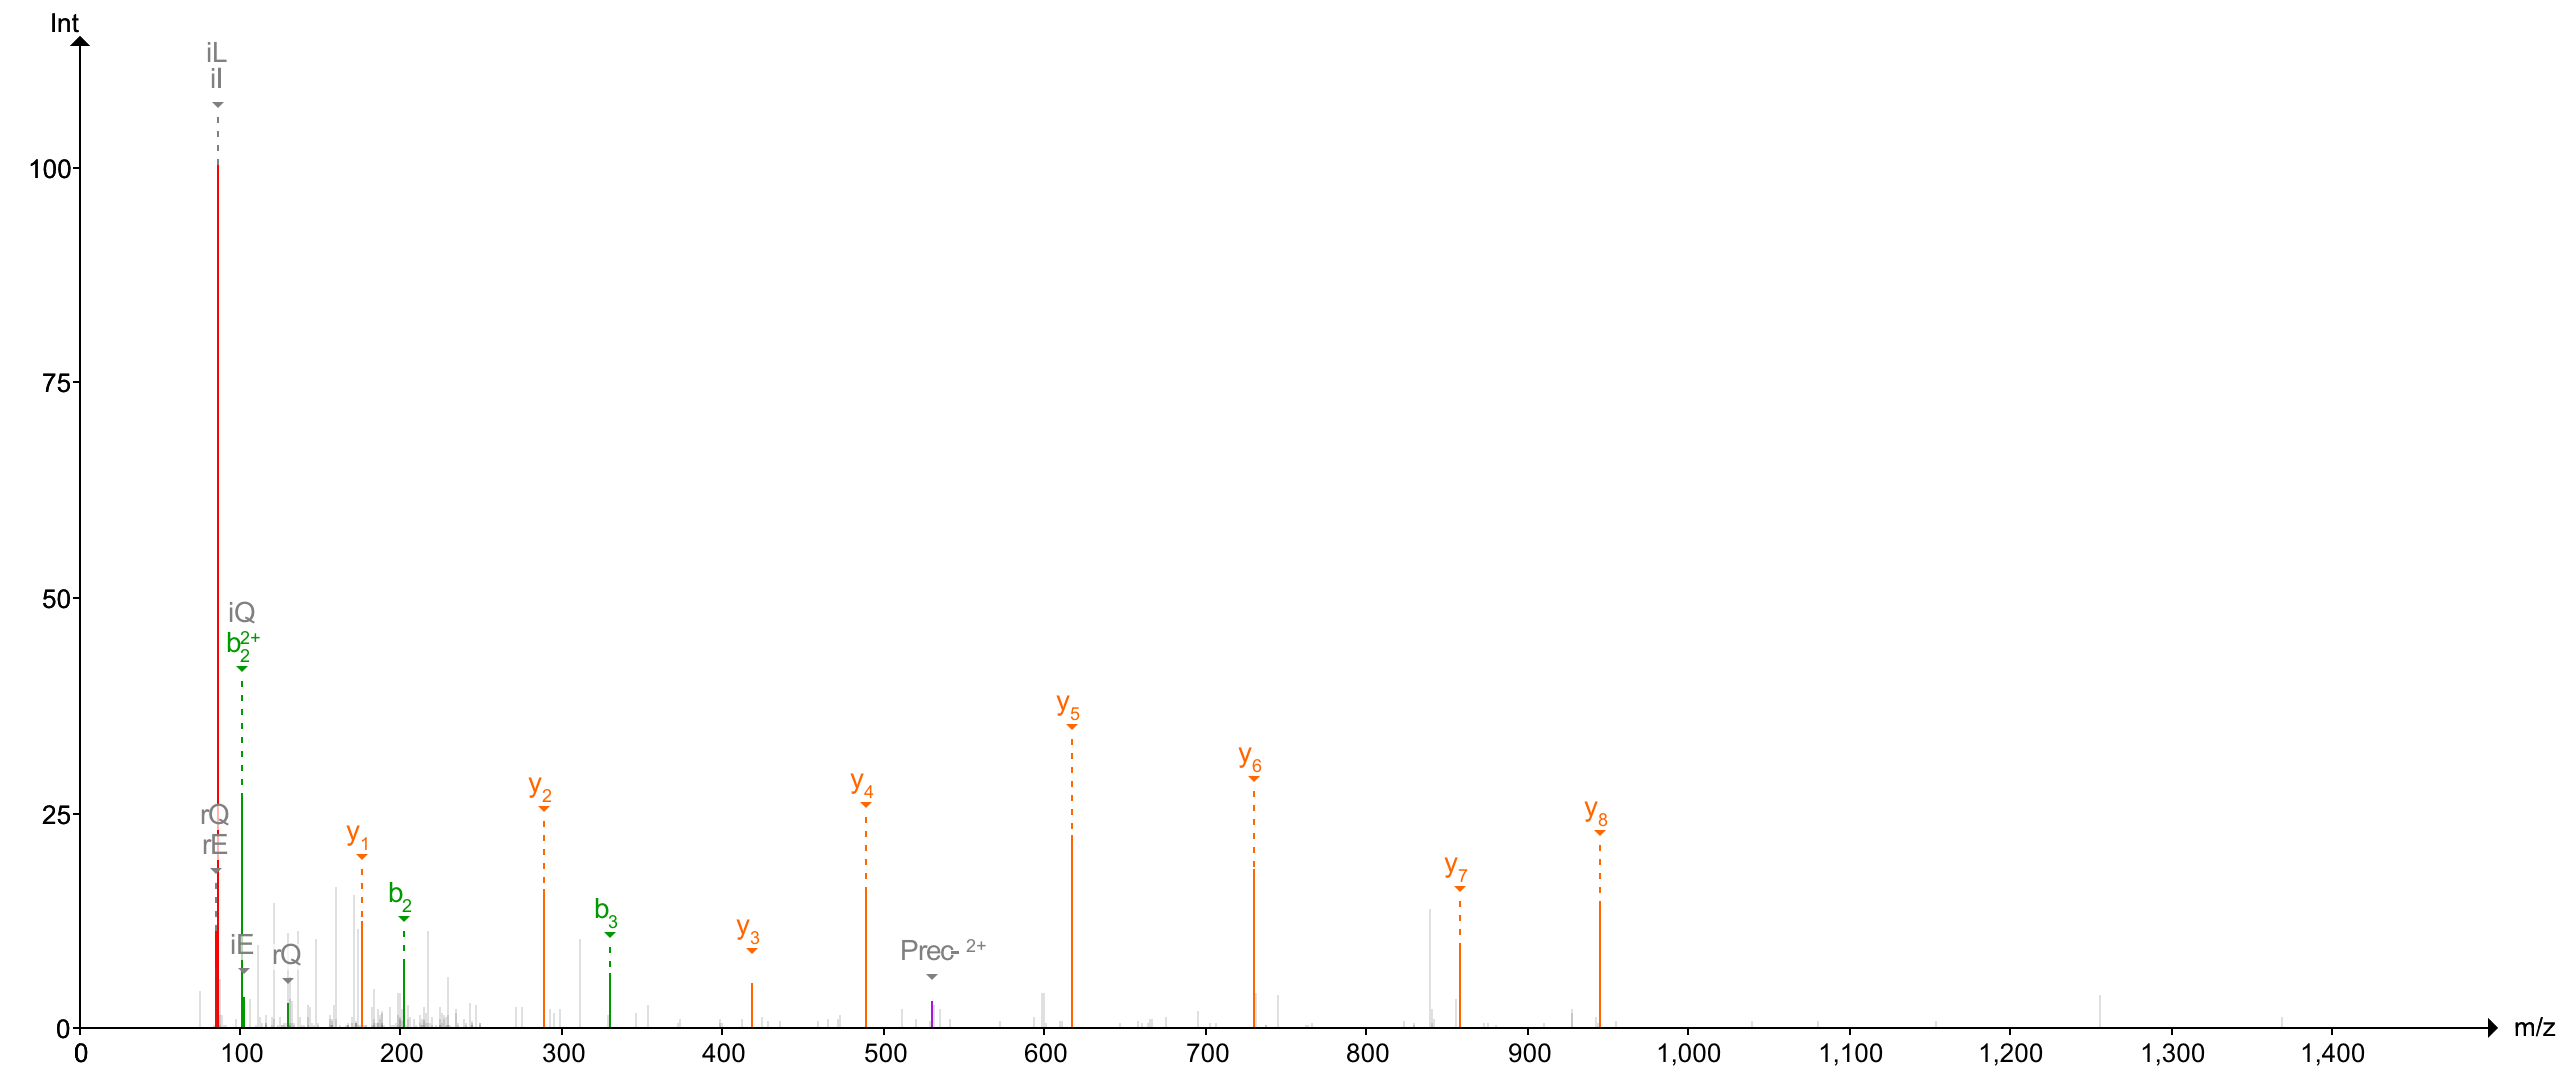

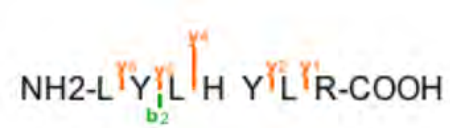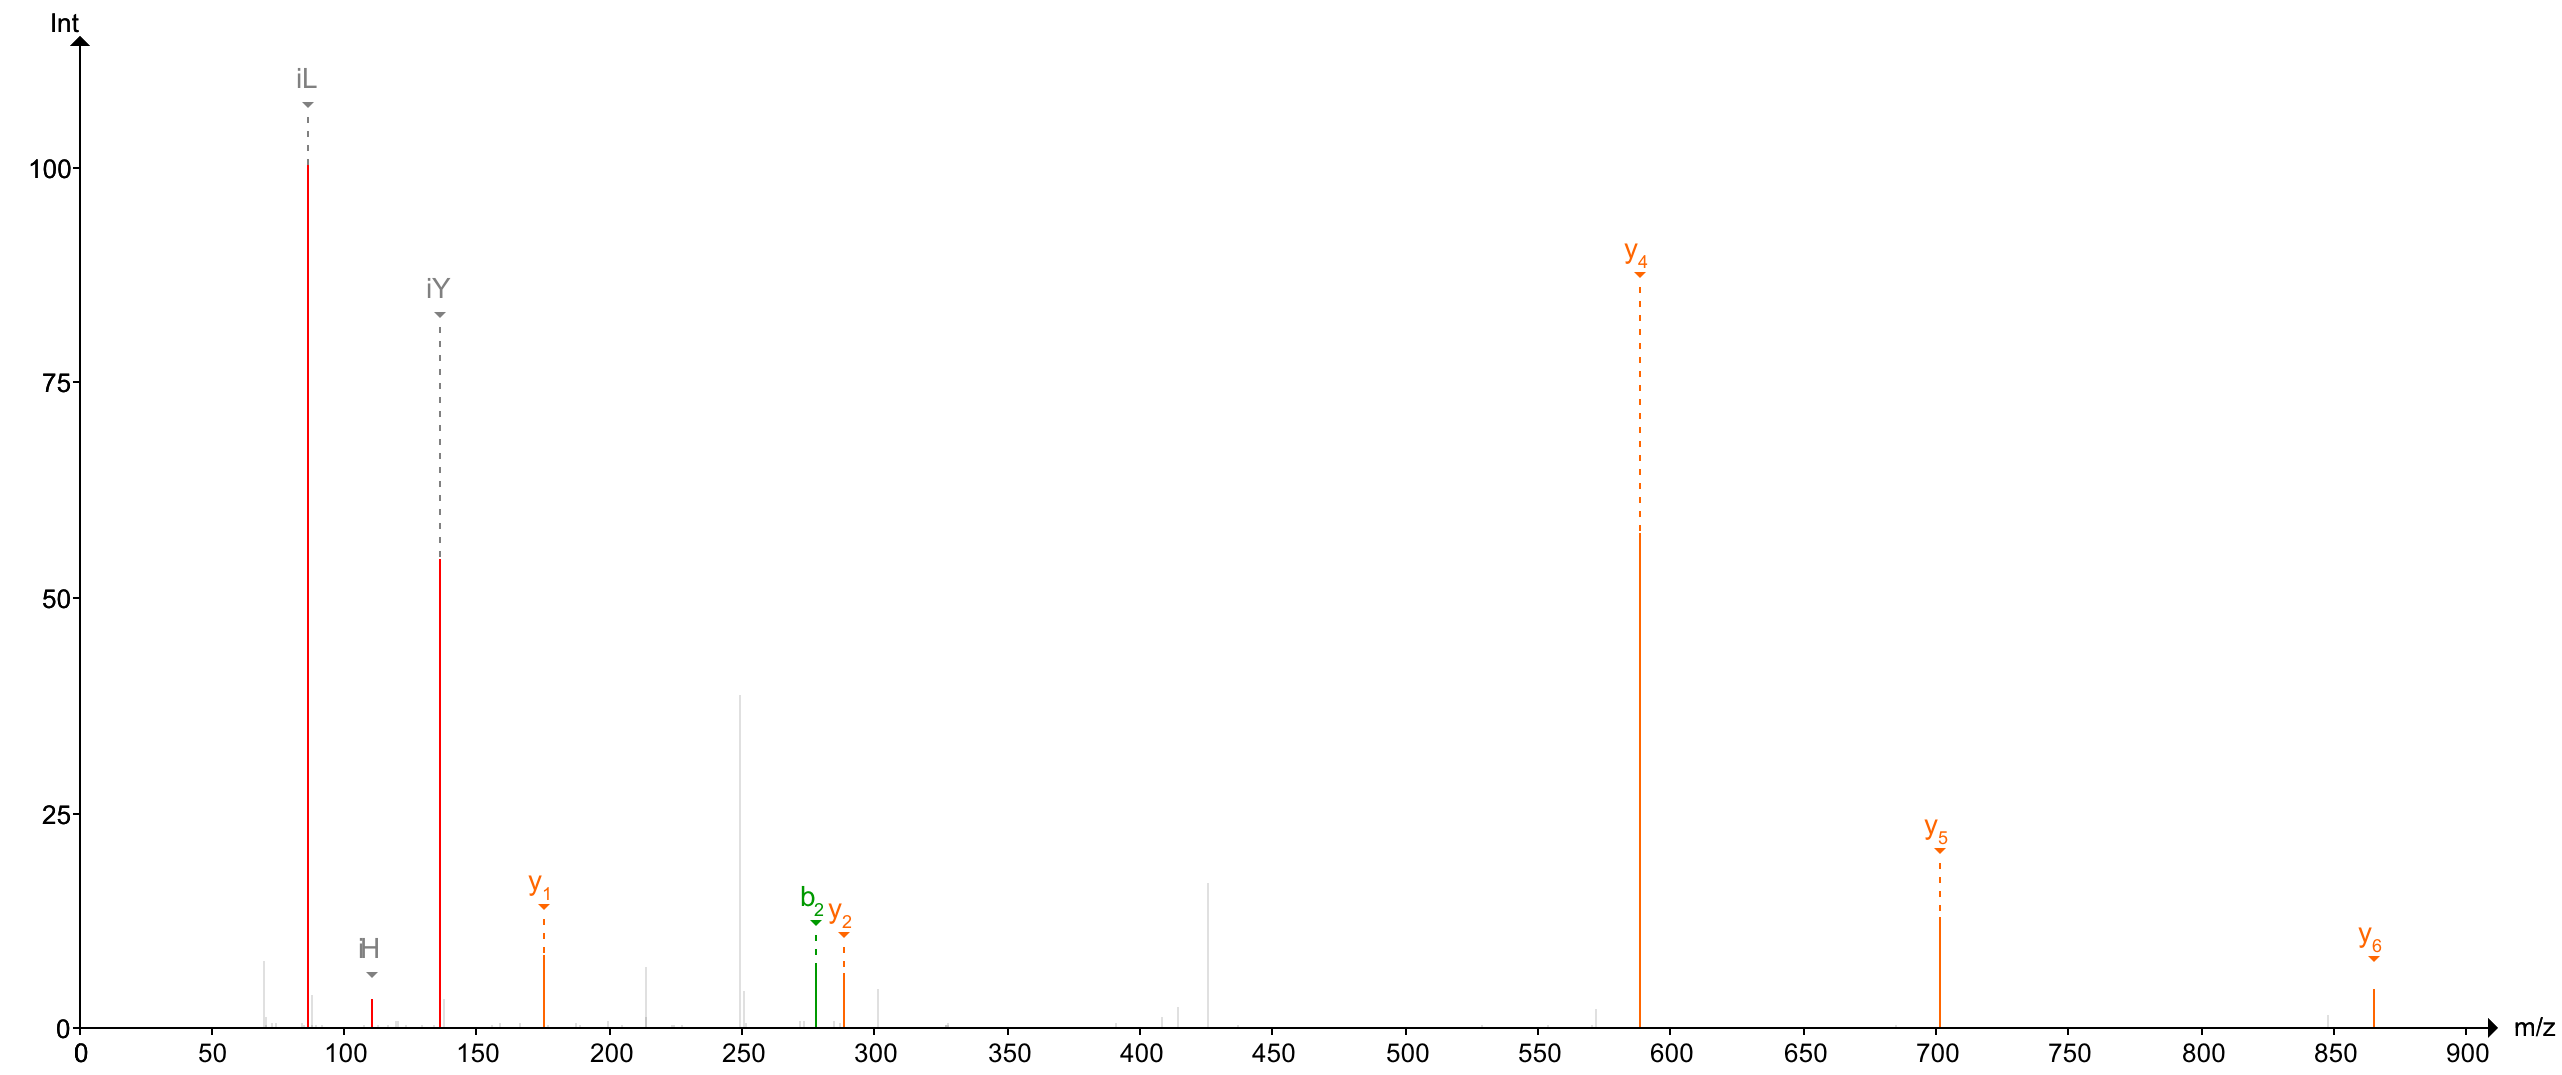

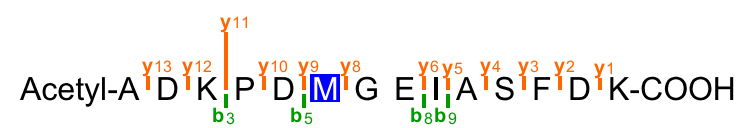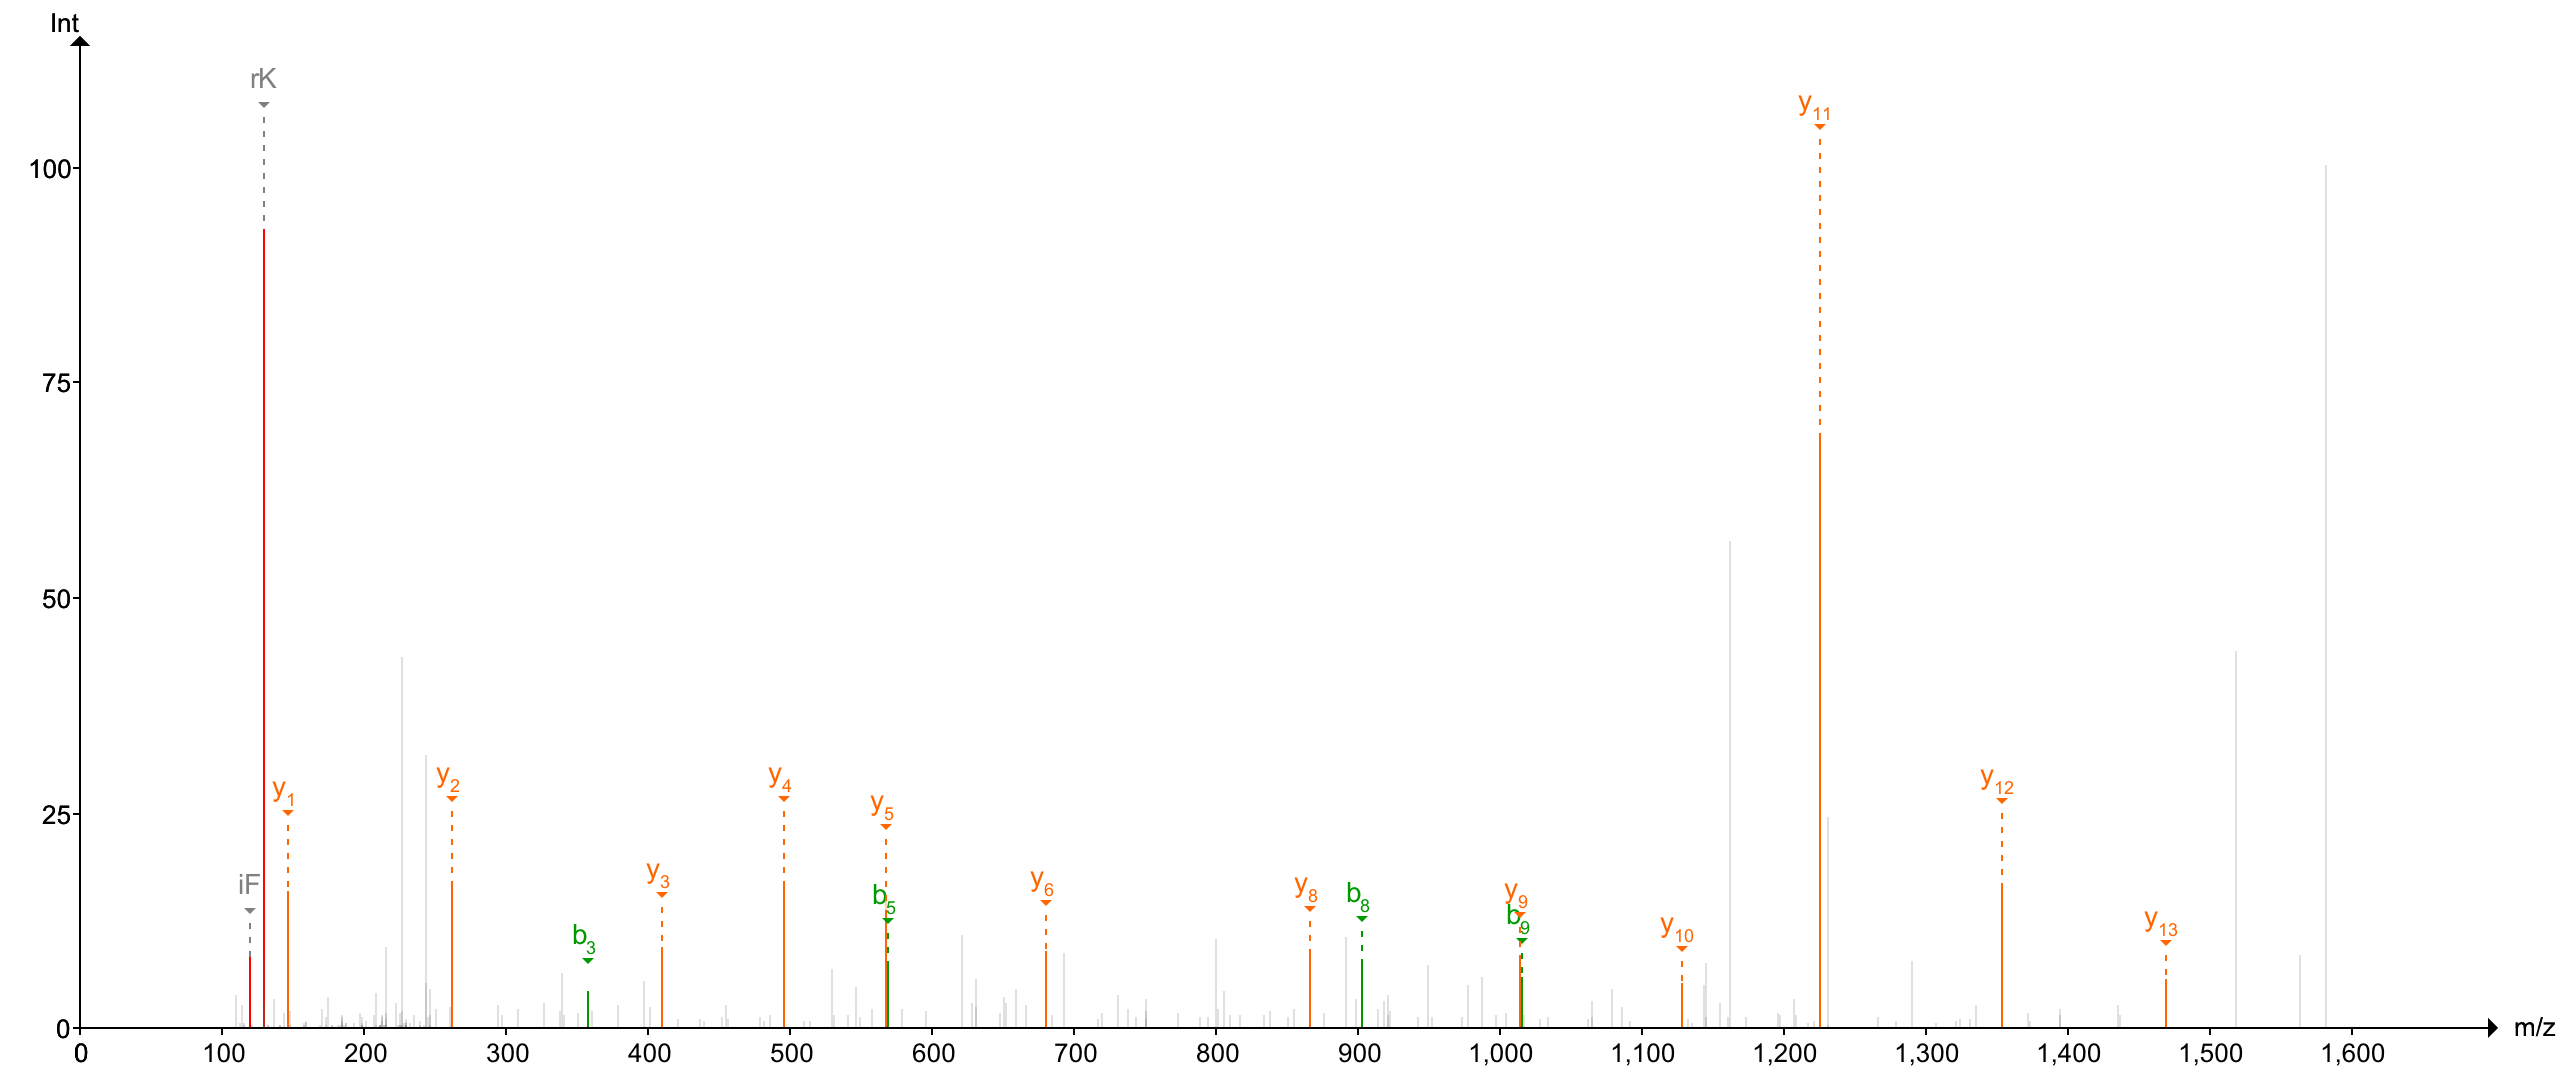

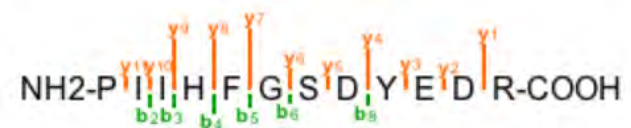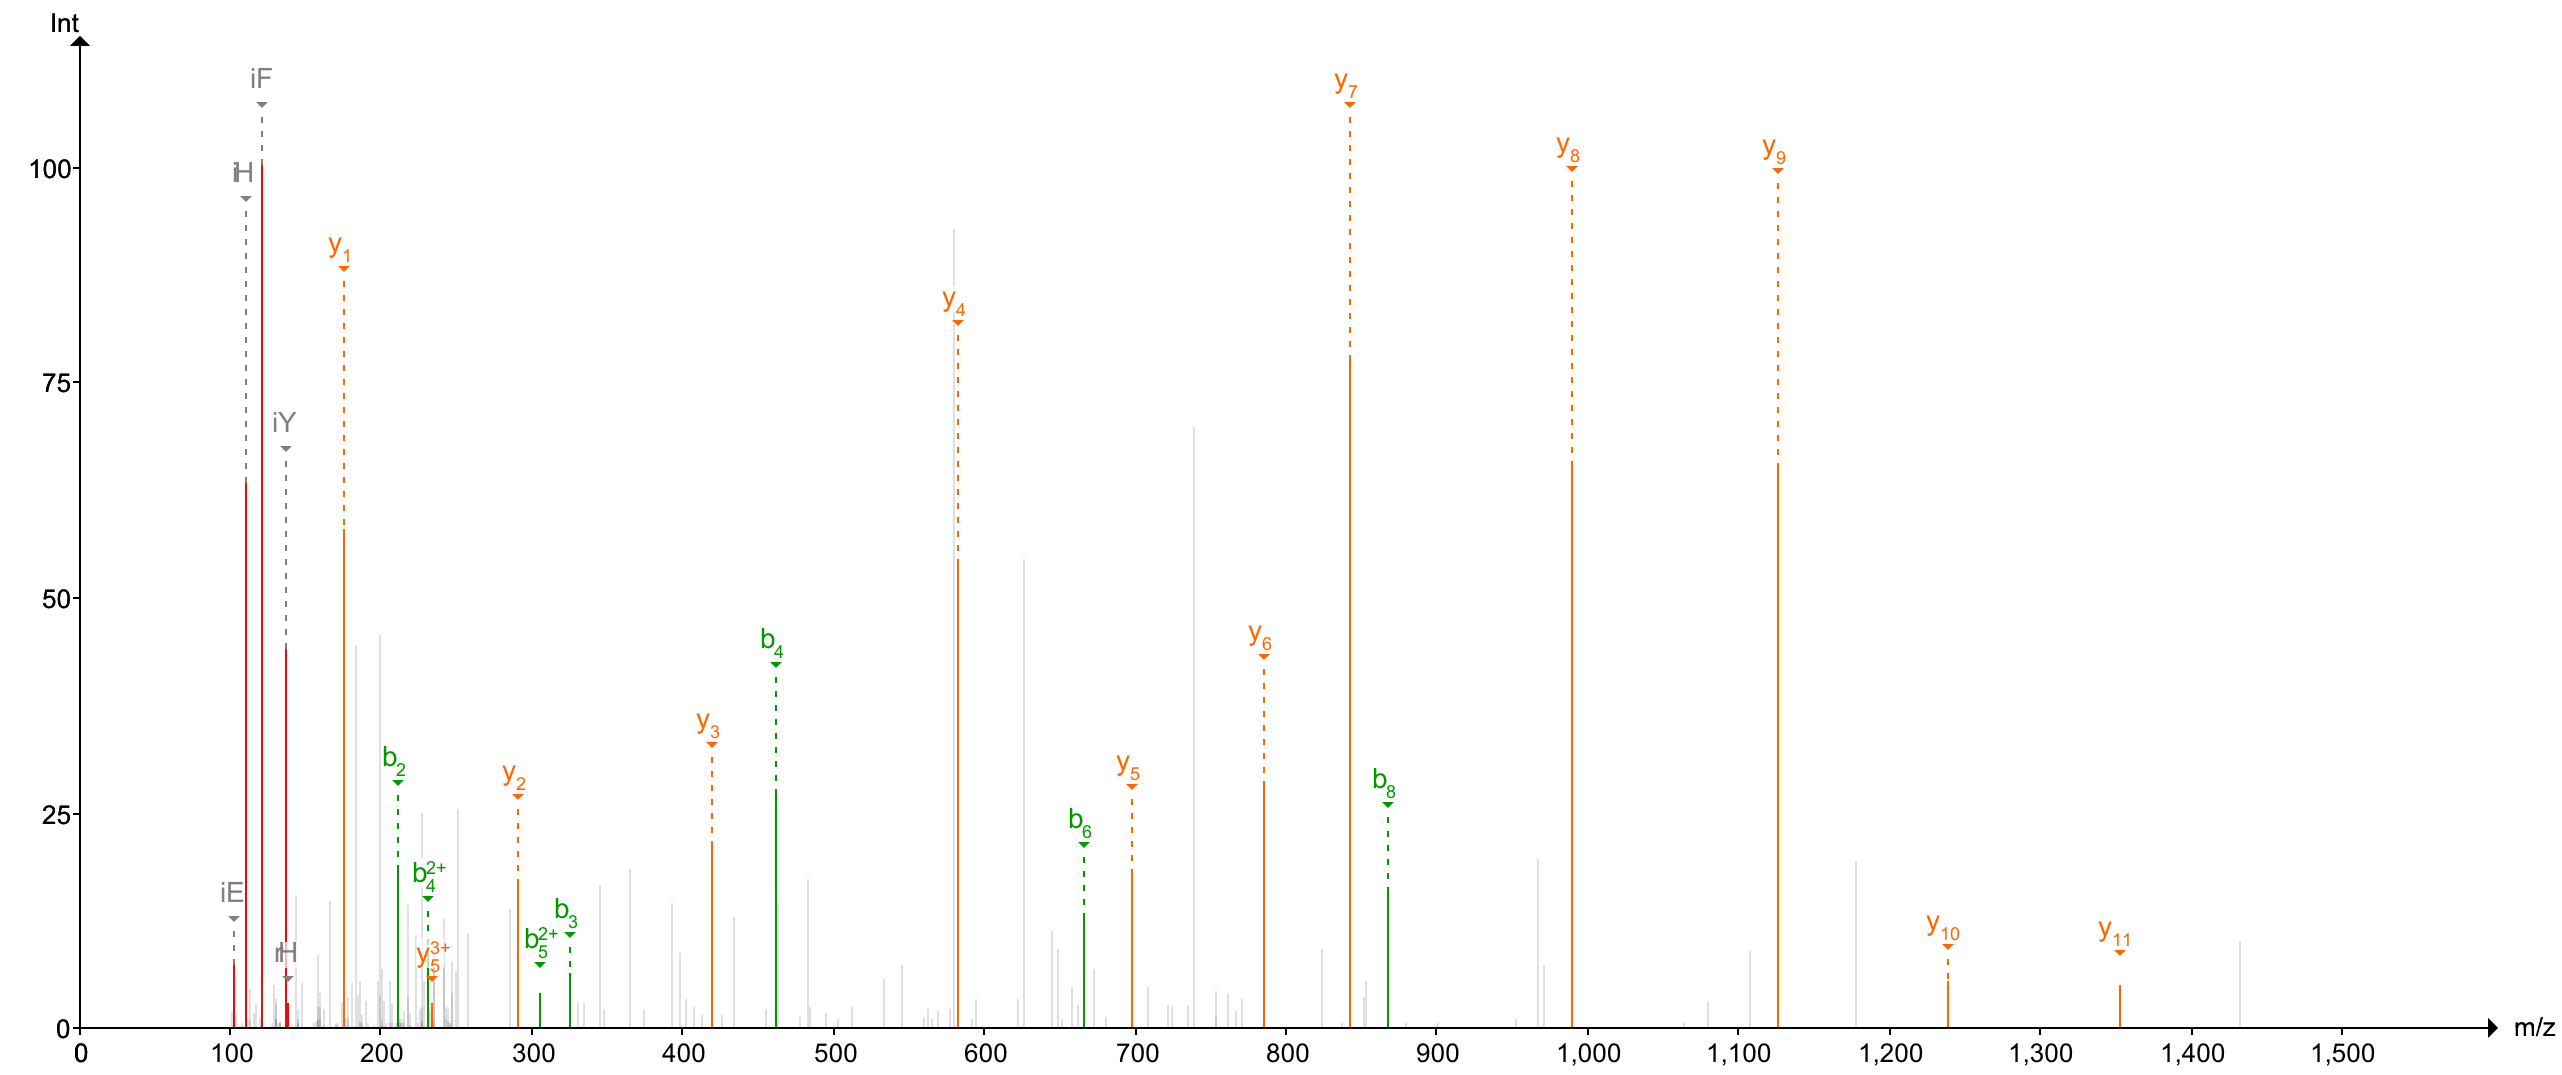

NH<sub>2</sub>-L E<sub>1</sub>L<sub>2</sub>I<sub>3</sub>D<sub>4</sub>Q<sub>5</sub>L<sub>6</sub>E<sub>7</sub>V<sub>8</sub>R-COOH  
b<sub>2</sub> b<sub>4</sub> y<sub>1</sub> y<sub>3</sub> y<sub>4</sub> y<sub>5</sub> y<sub>6</sub> y<sub>7</sub>

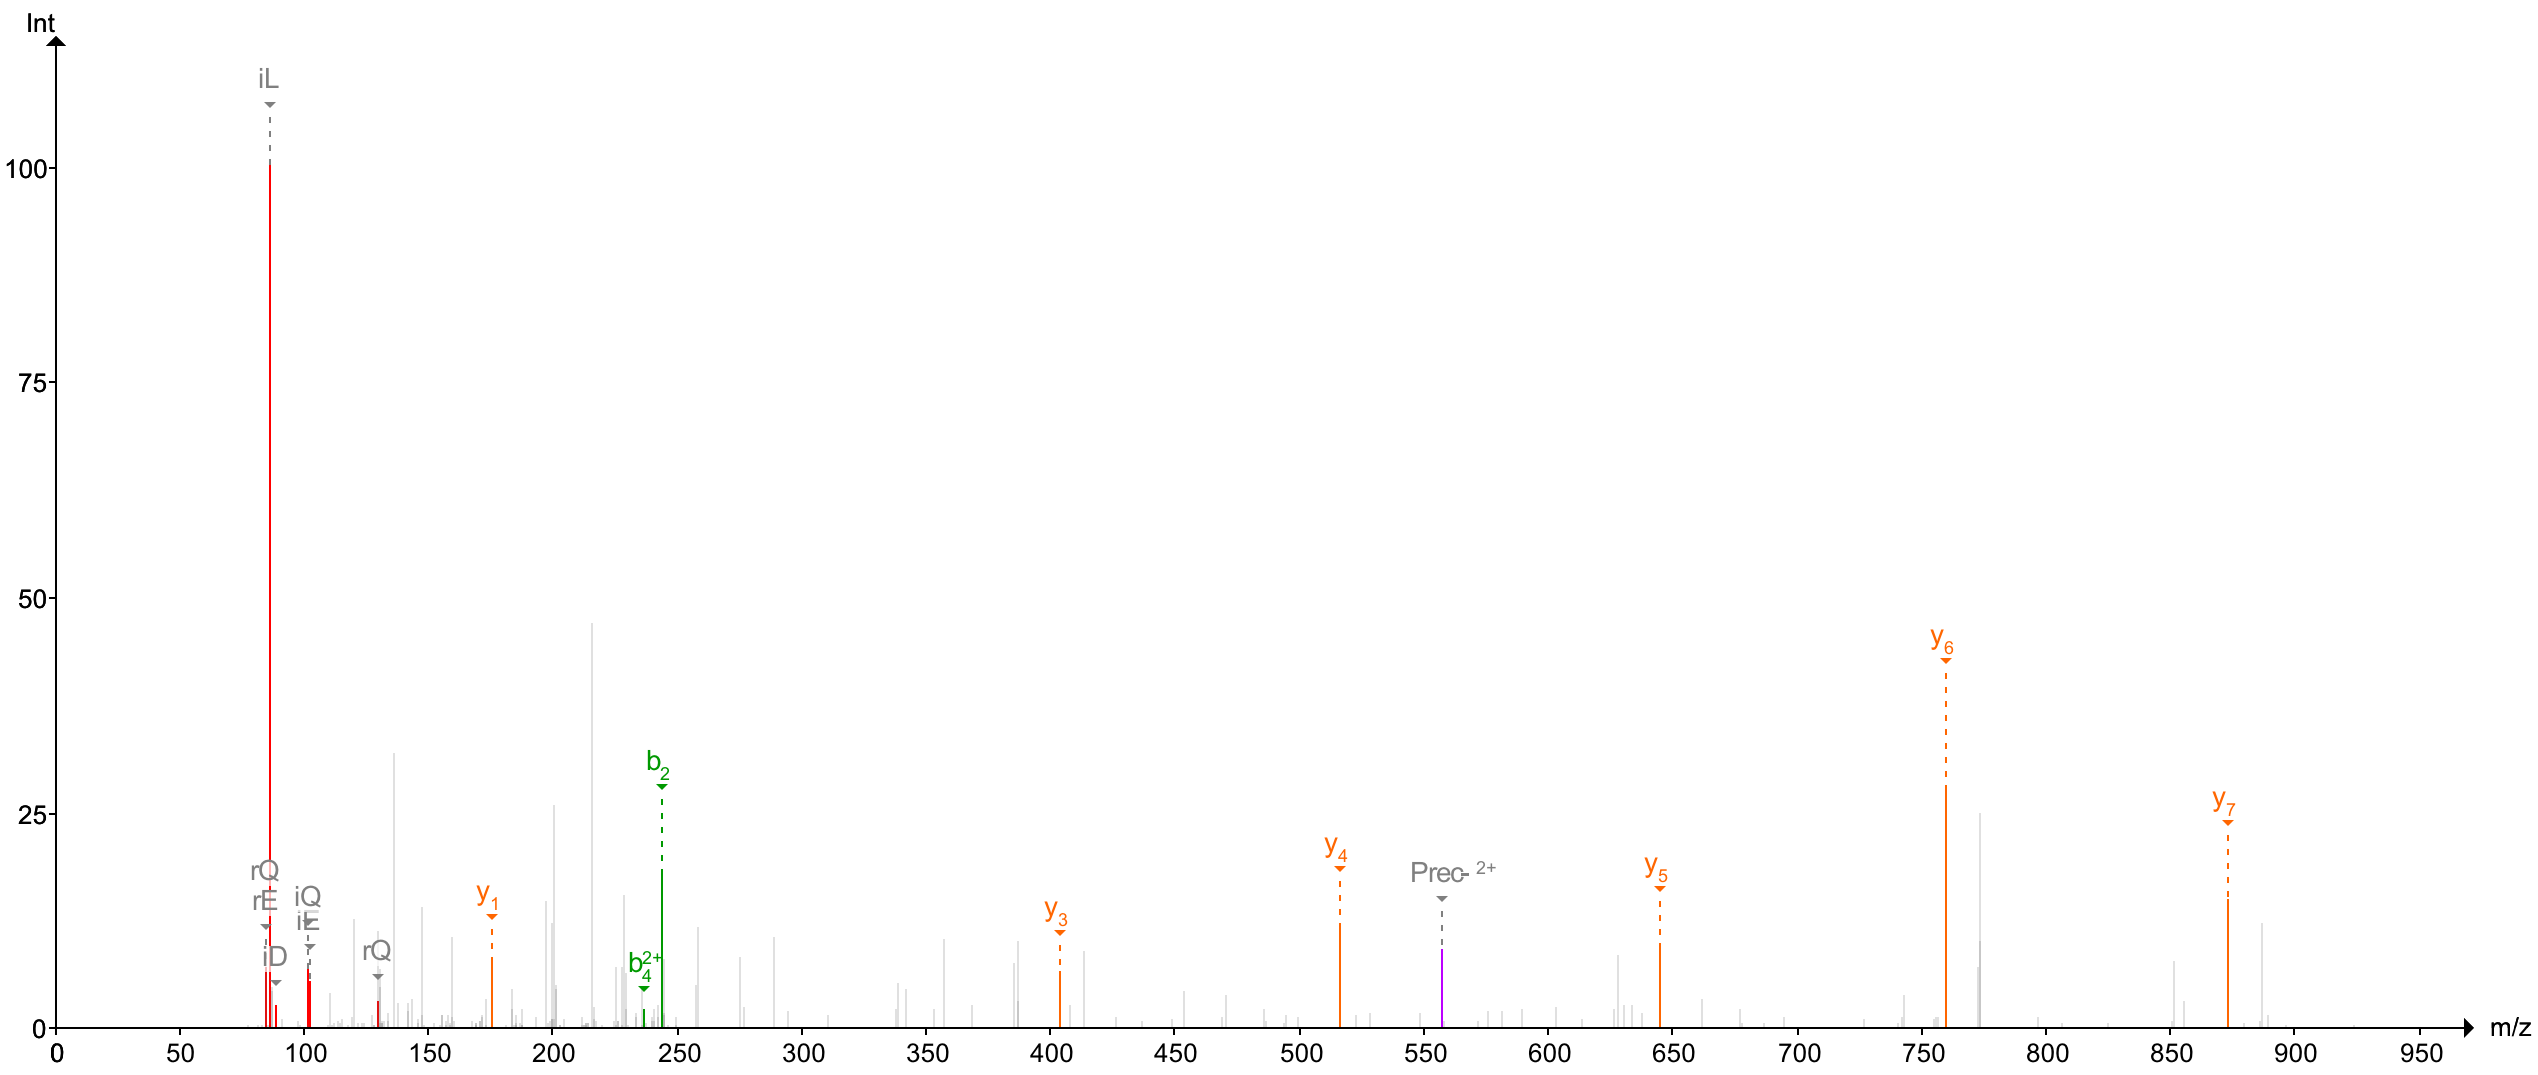

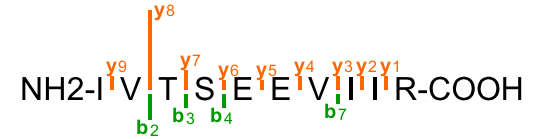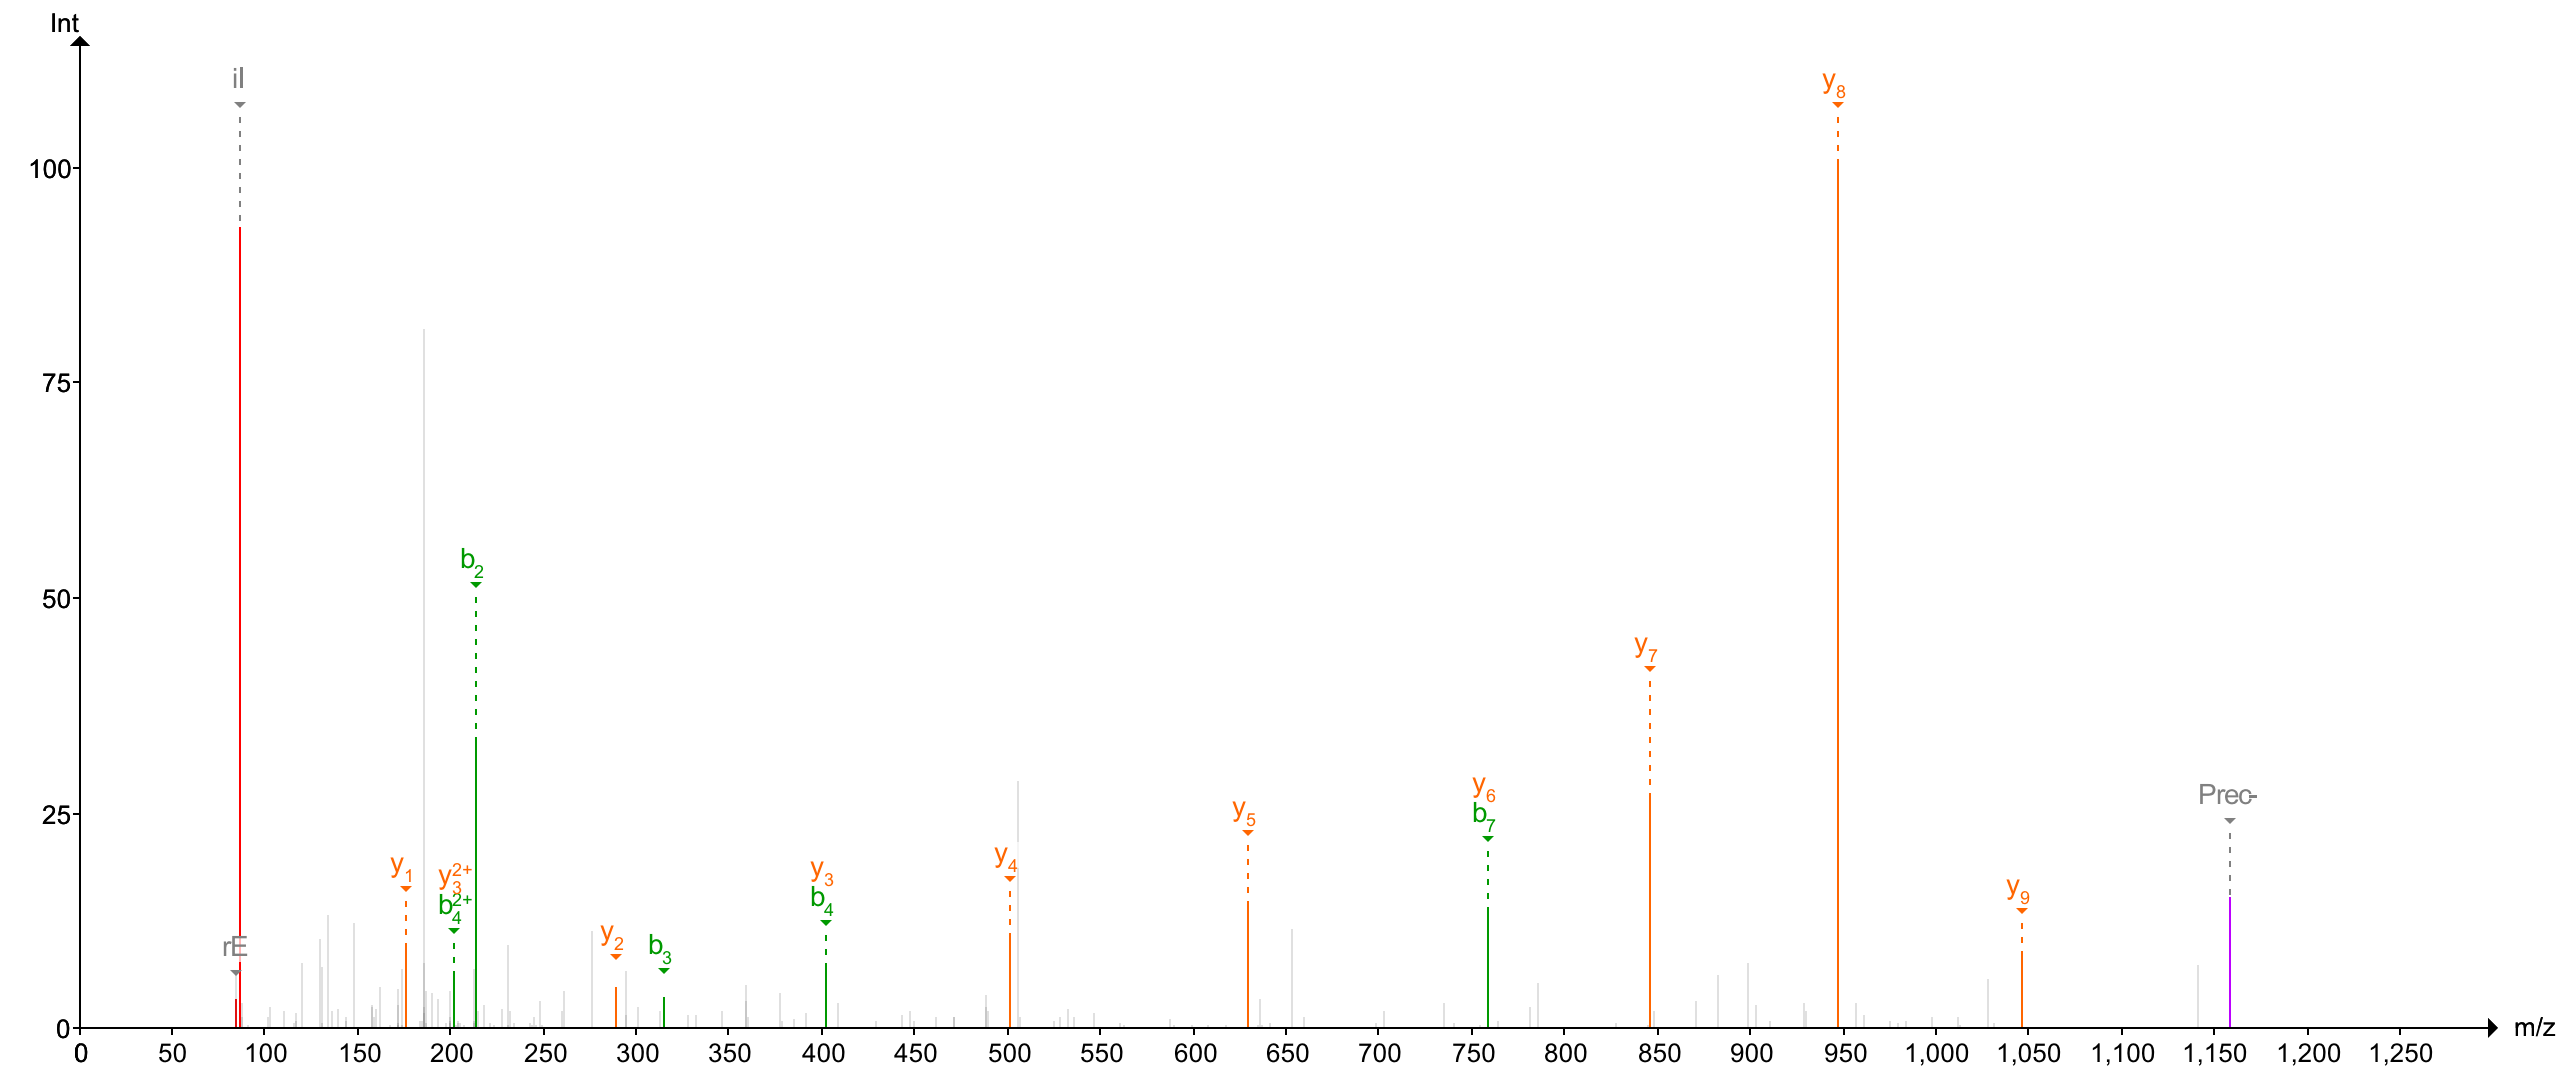

NH<sub>2</sub>-Y Q<sup>Y<sub>1</sub></sup> Q<sup>Y<sub>2</sub></sup> F<sup>Y<sub>3</sub></sup> P<sup>Y<sub>4</sub></sup> E<sup>Y<sub>5</sub></sup> F<sup>Y<sub>6</sub></sup> K-COOH  
b<sub>2</sub> b<sub>3</sub>

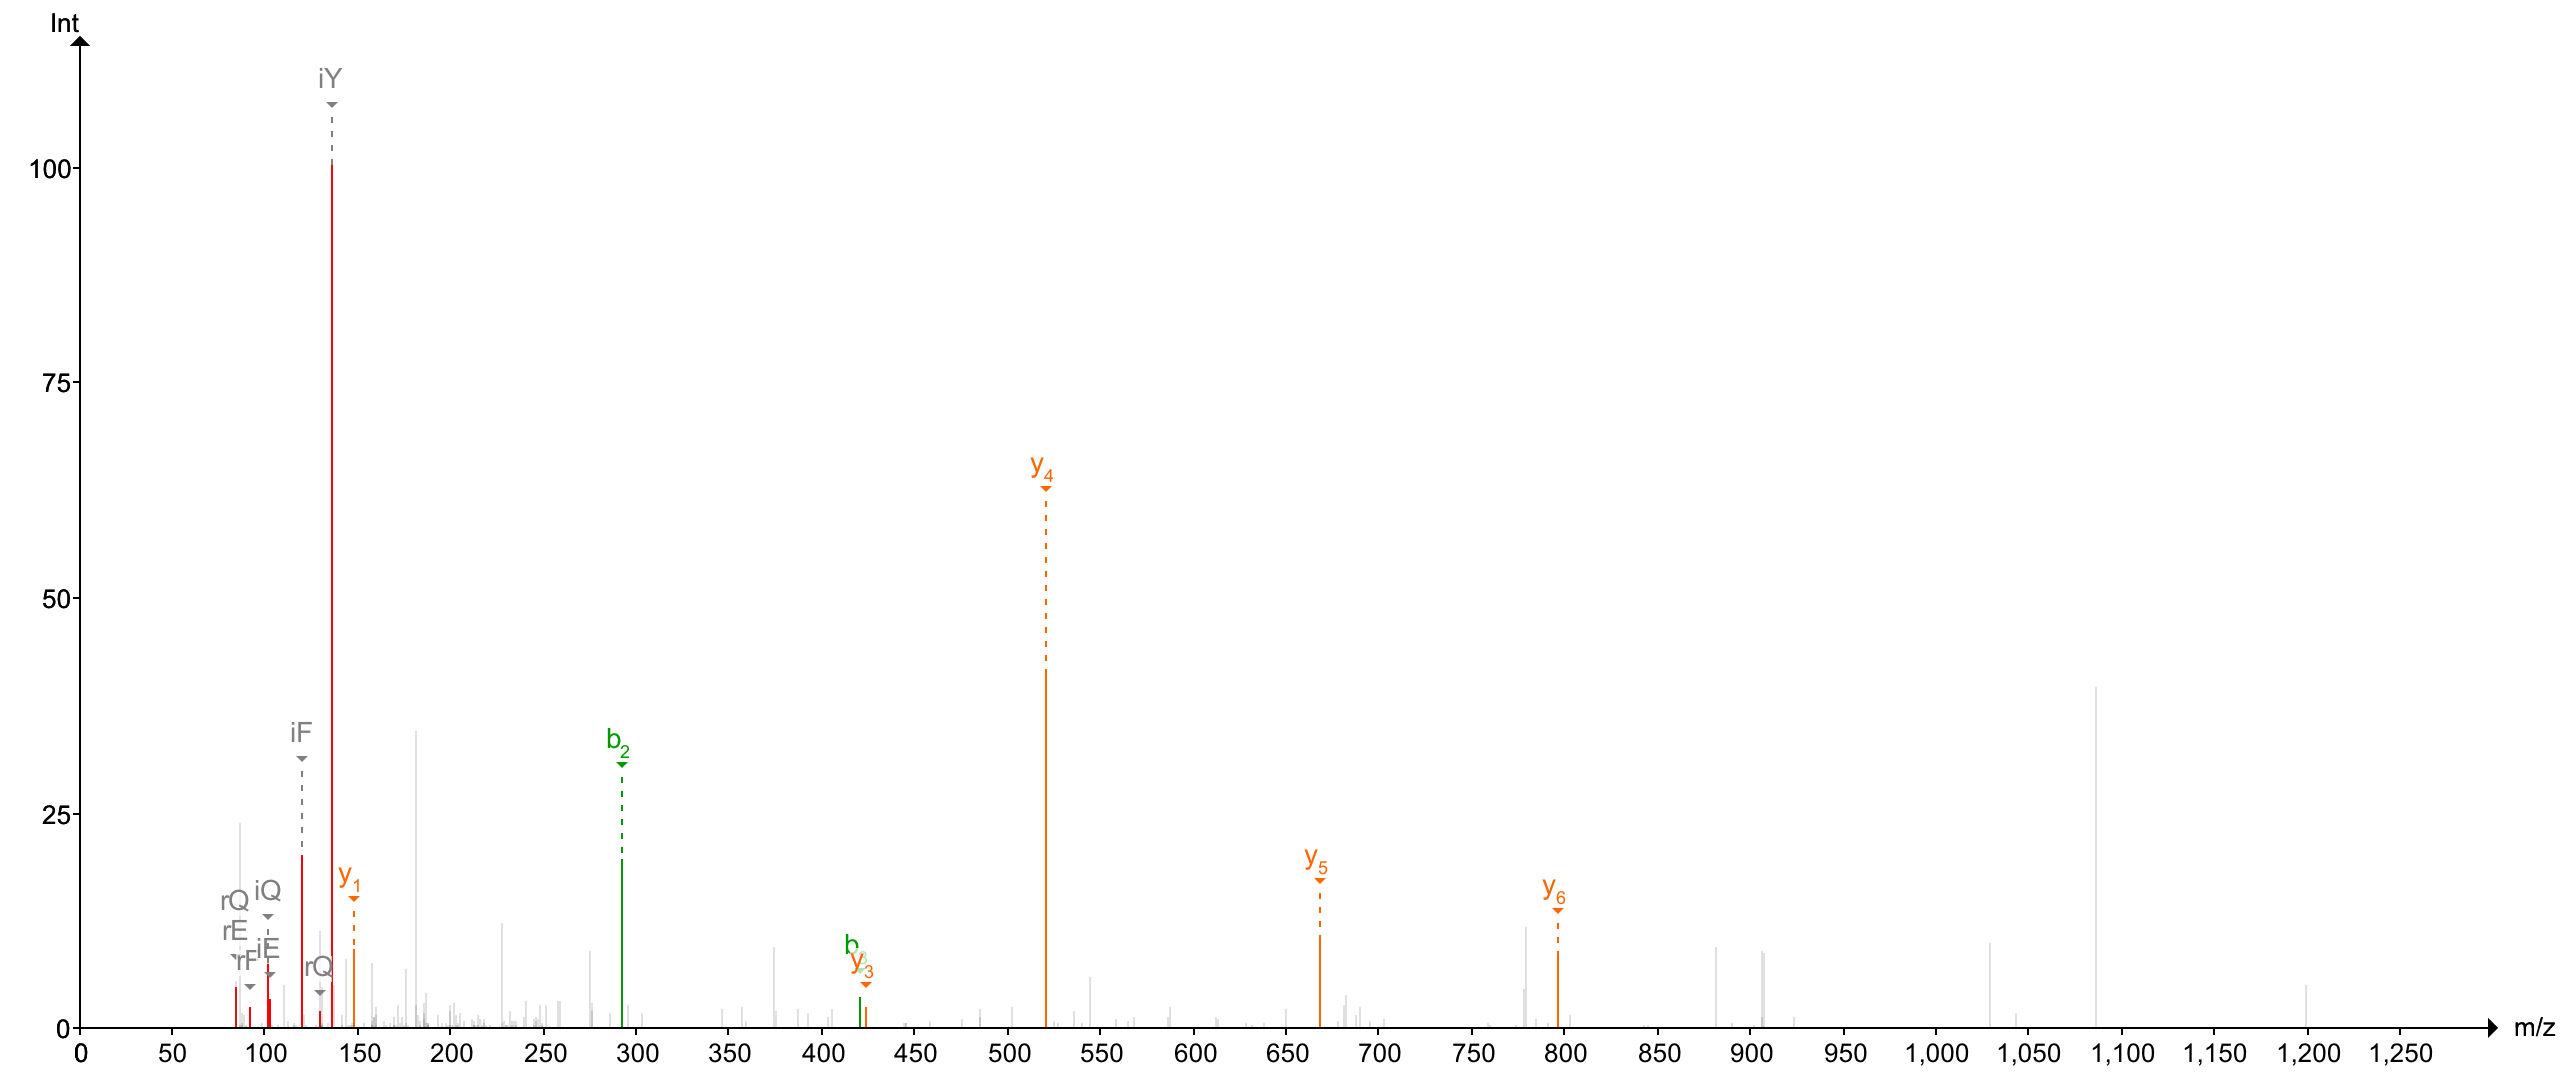



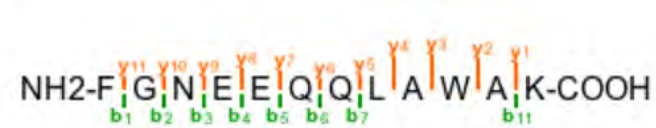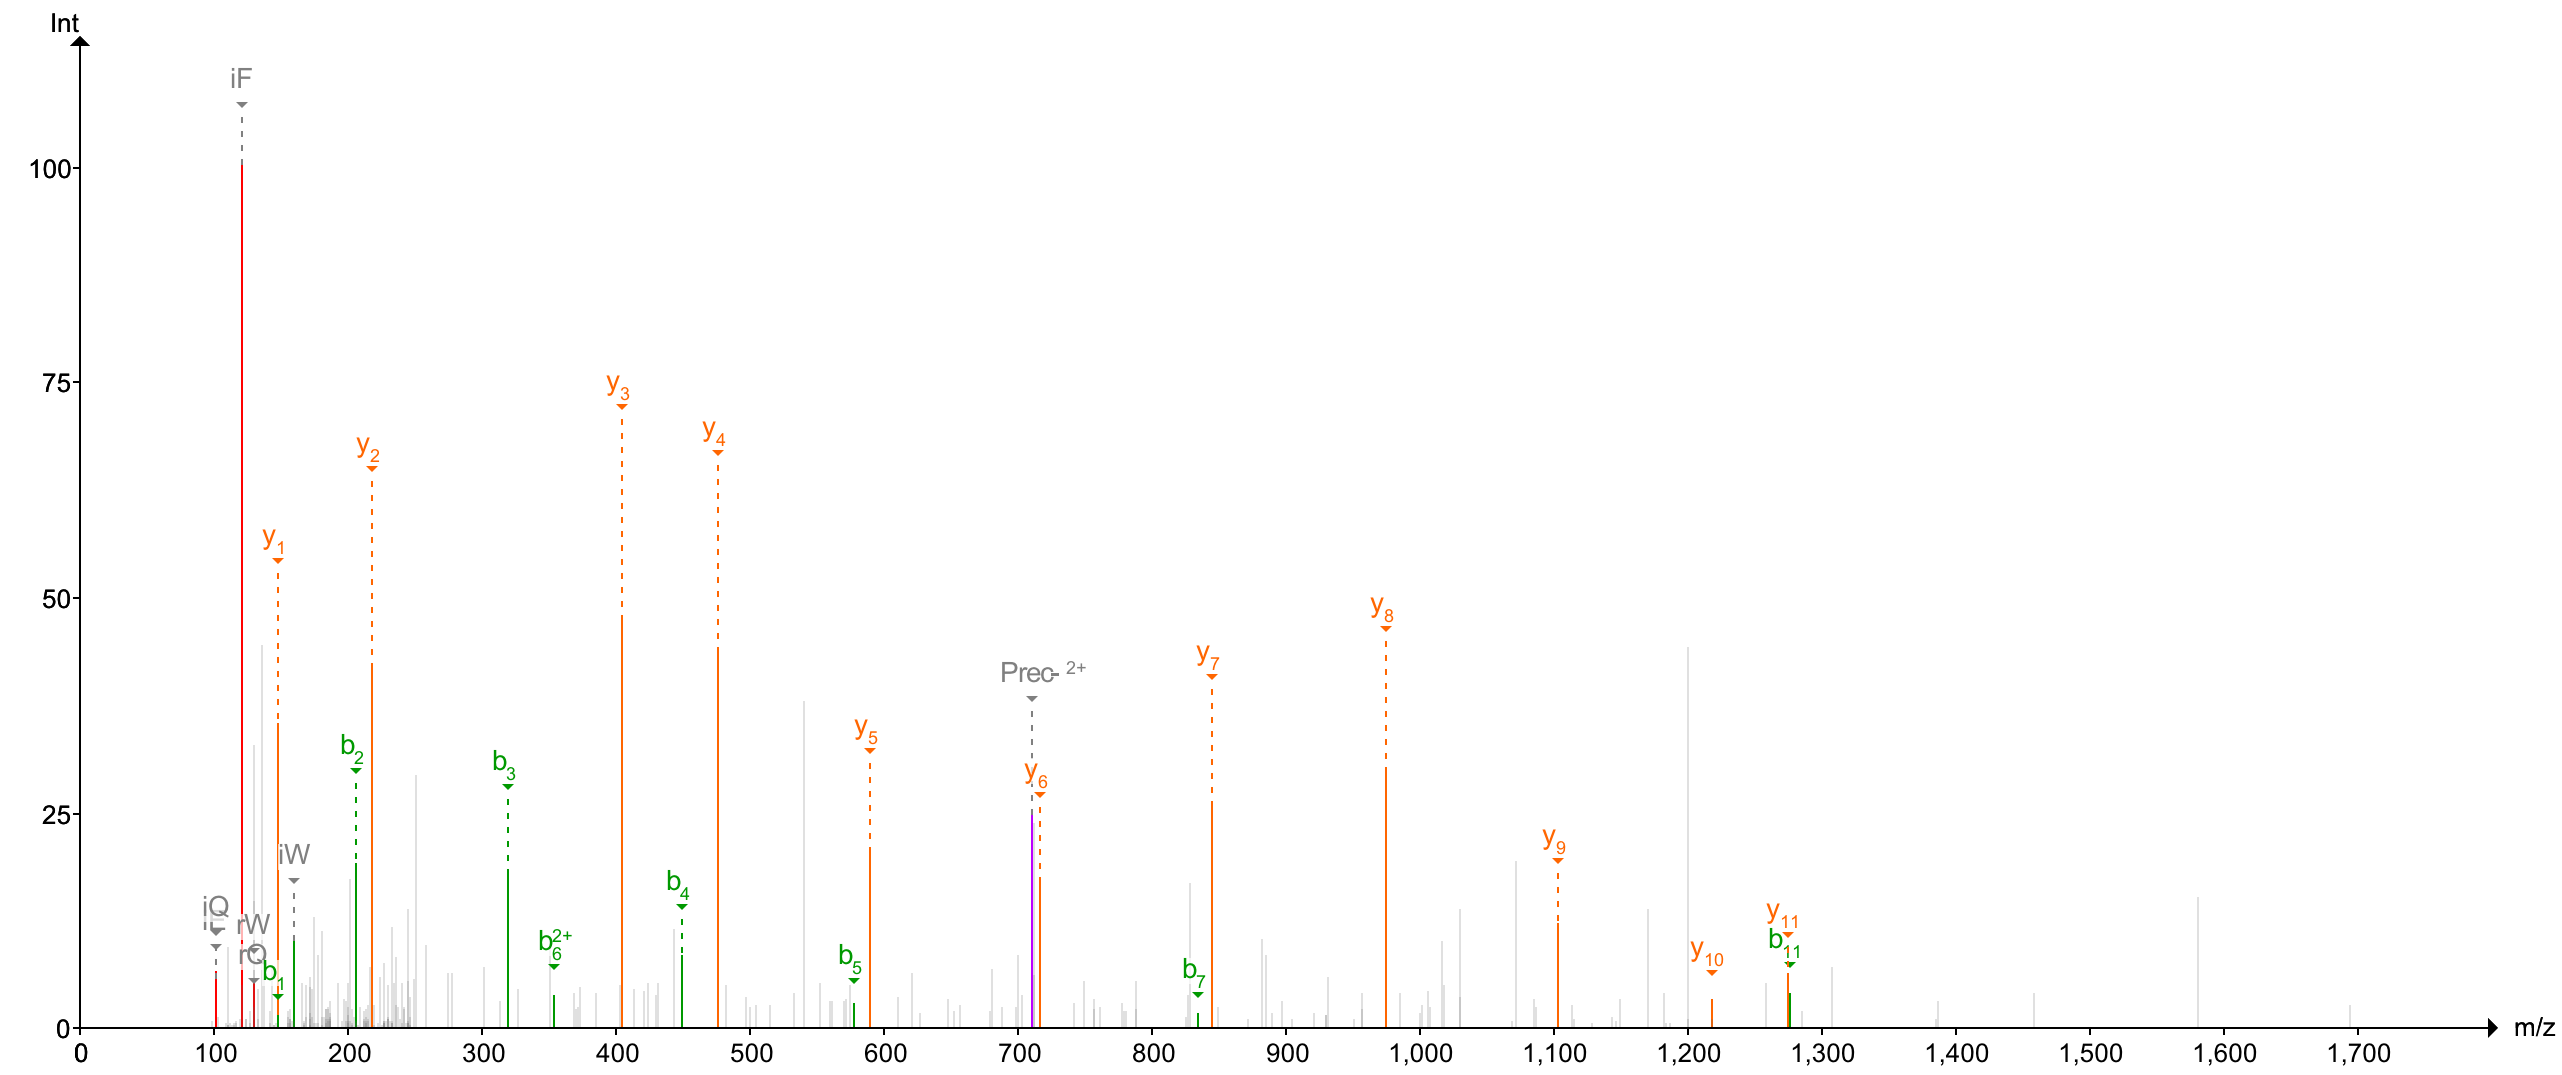

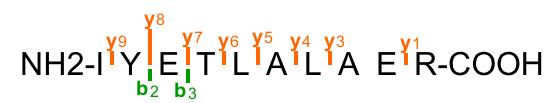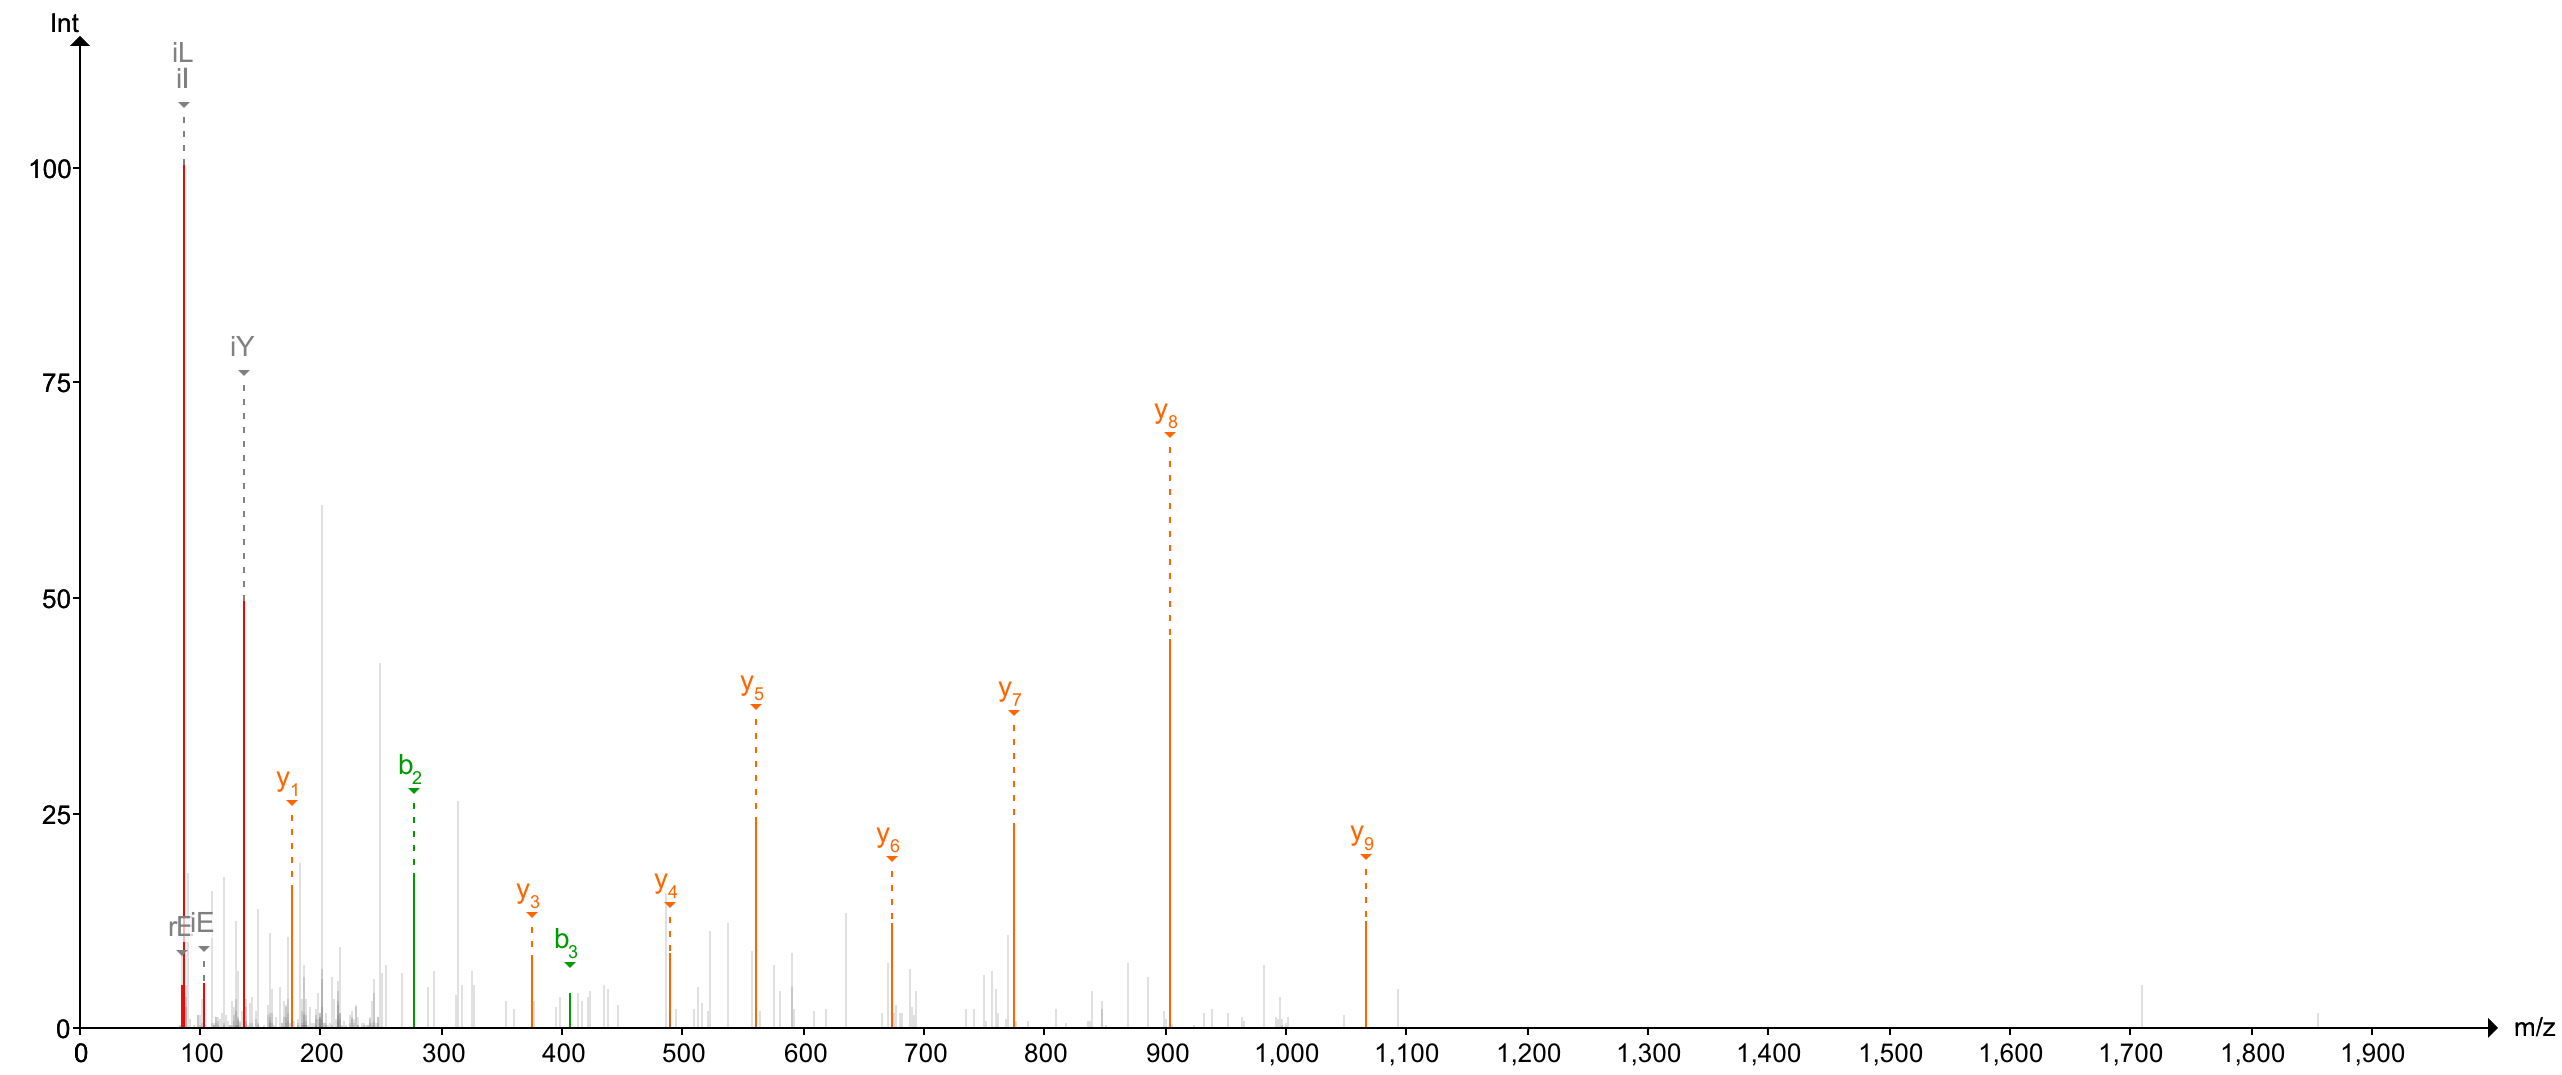

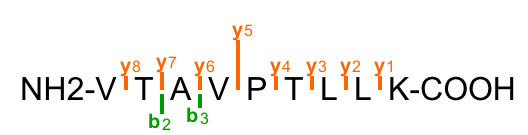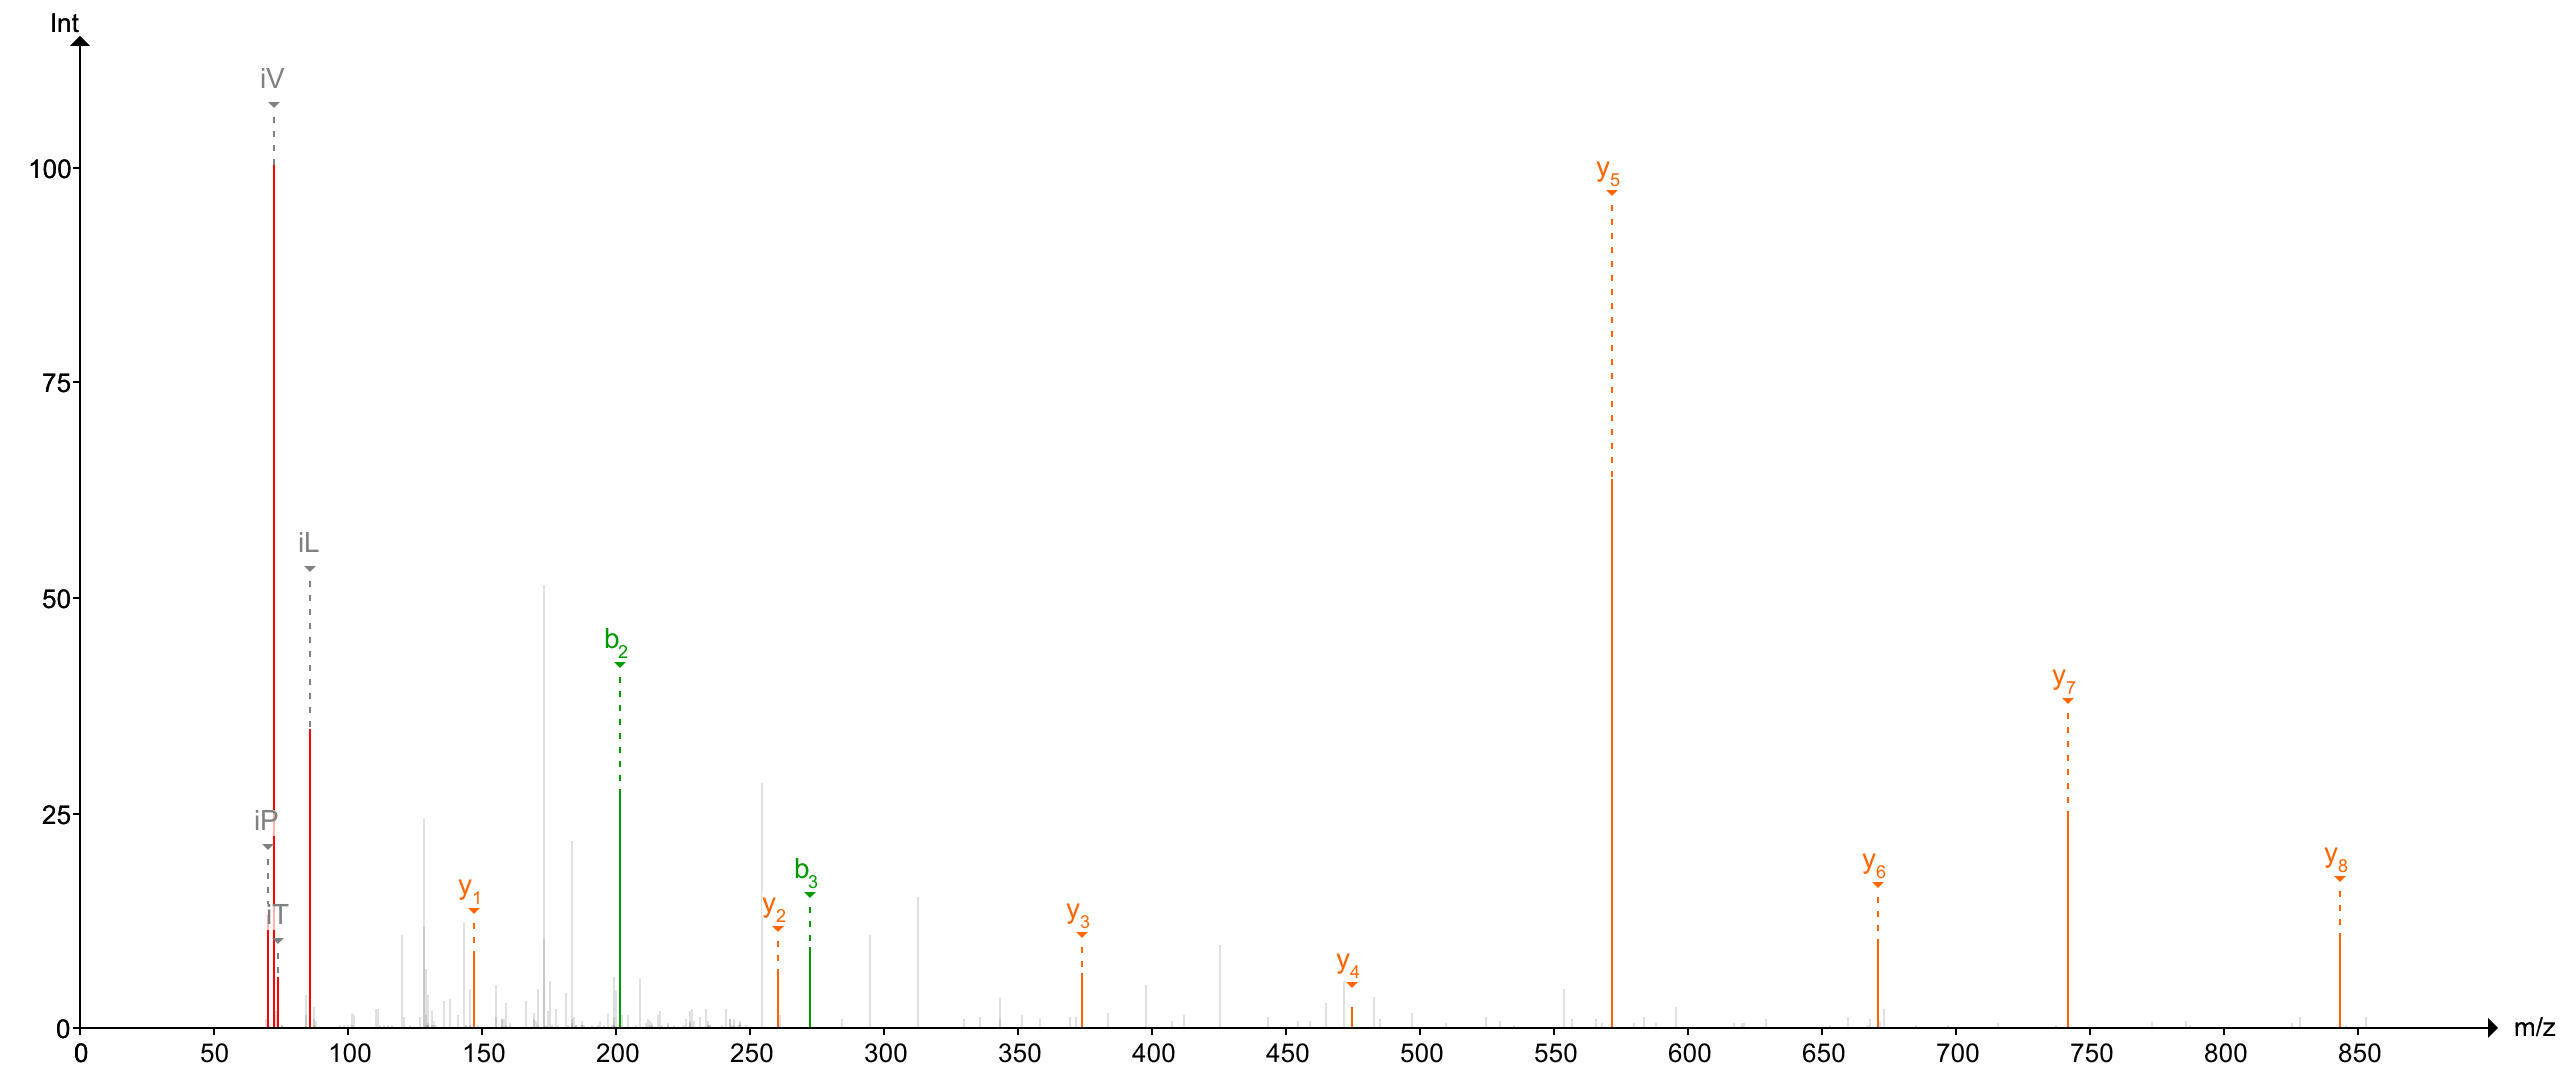

NH<sub>2</sub>-S P S D L L D A S A V S A T S R-COOH

b<sub>2</sub> b<sub>3</sub> b<sub>4</sub> b<sub>5</sub> b<sub>6</sub> b<sub>7</sub>

y<sub>1</sub> y<sub>2</sub> y<sub>3</sub> y<sub>4</sub> y<sub>5</sub> y<sub>6</sub> y<sub>7</sub> y<sub>8</sub> y<sub>9</sub> y<sub>10</sub> y<sub>11</sub> y<sub>12</sub> y<sub>13</sub> y<sub>14</sub>

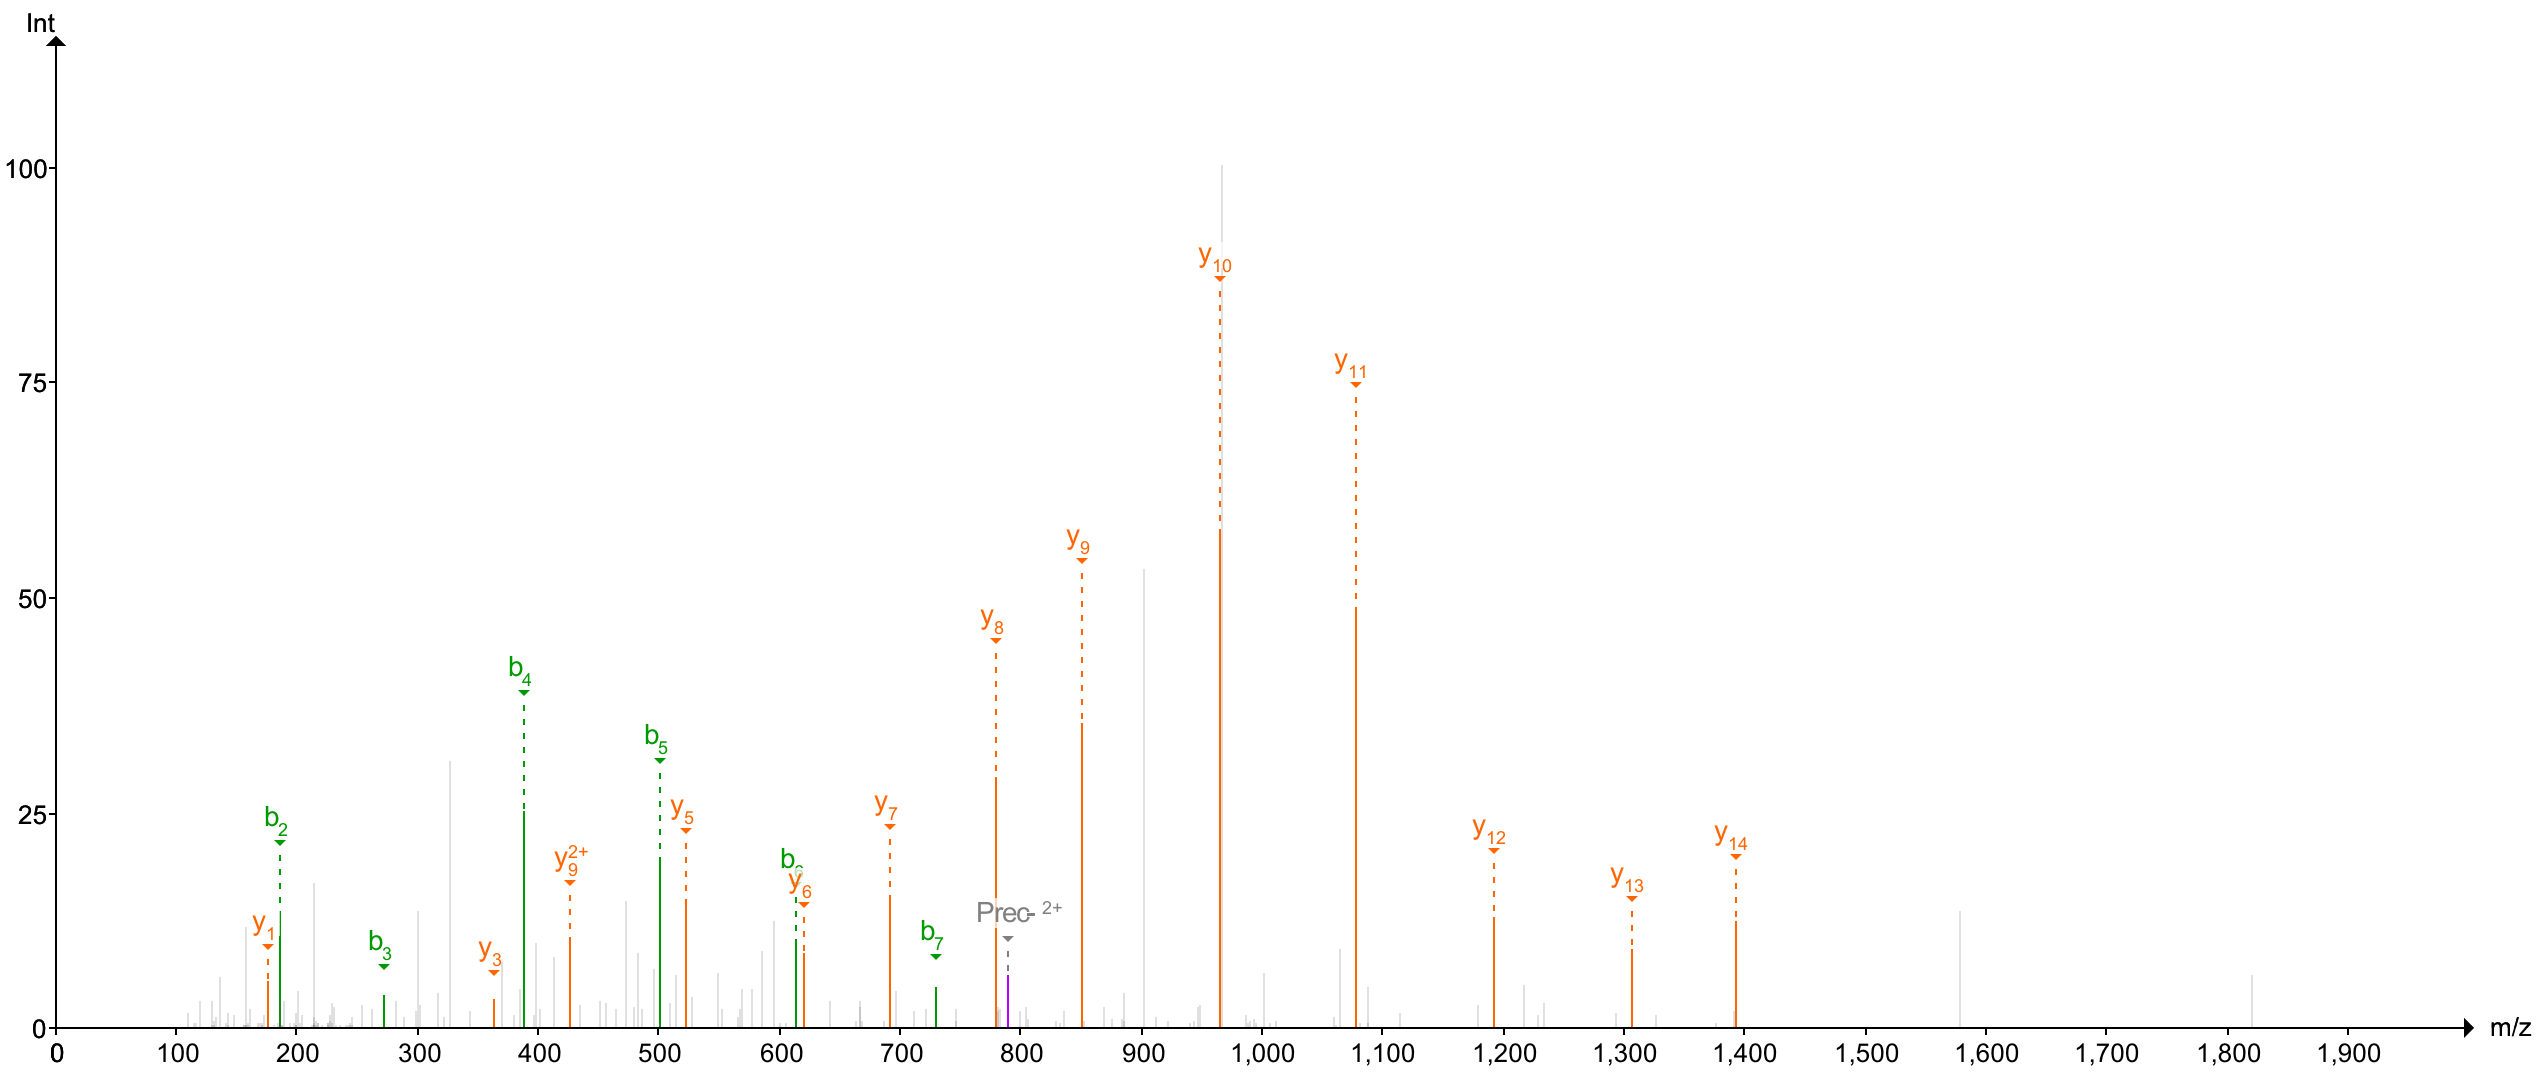

NH<sub>2</sub>-L<sup>Y6</sup>G<sup>Y7</sup>F<sup>Y5</sup>G<sup>Y4</sup>S<sup>Y3</sup>F<sup>Y2</sup>V<sup>Y1</sup>E<sup>Y1</sup>K-COOH

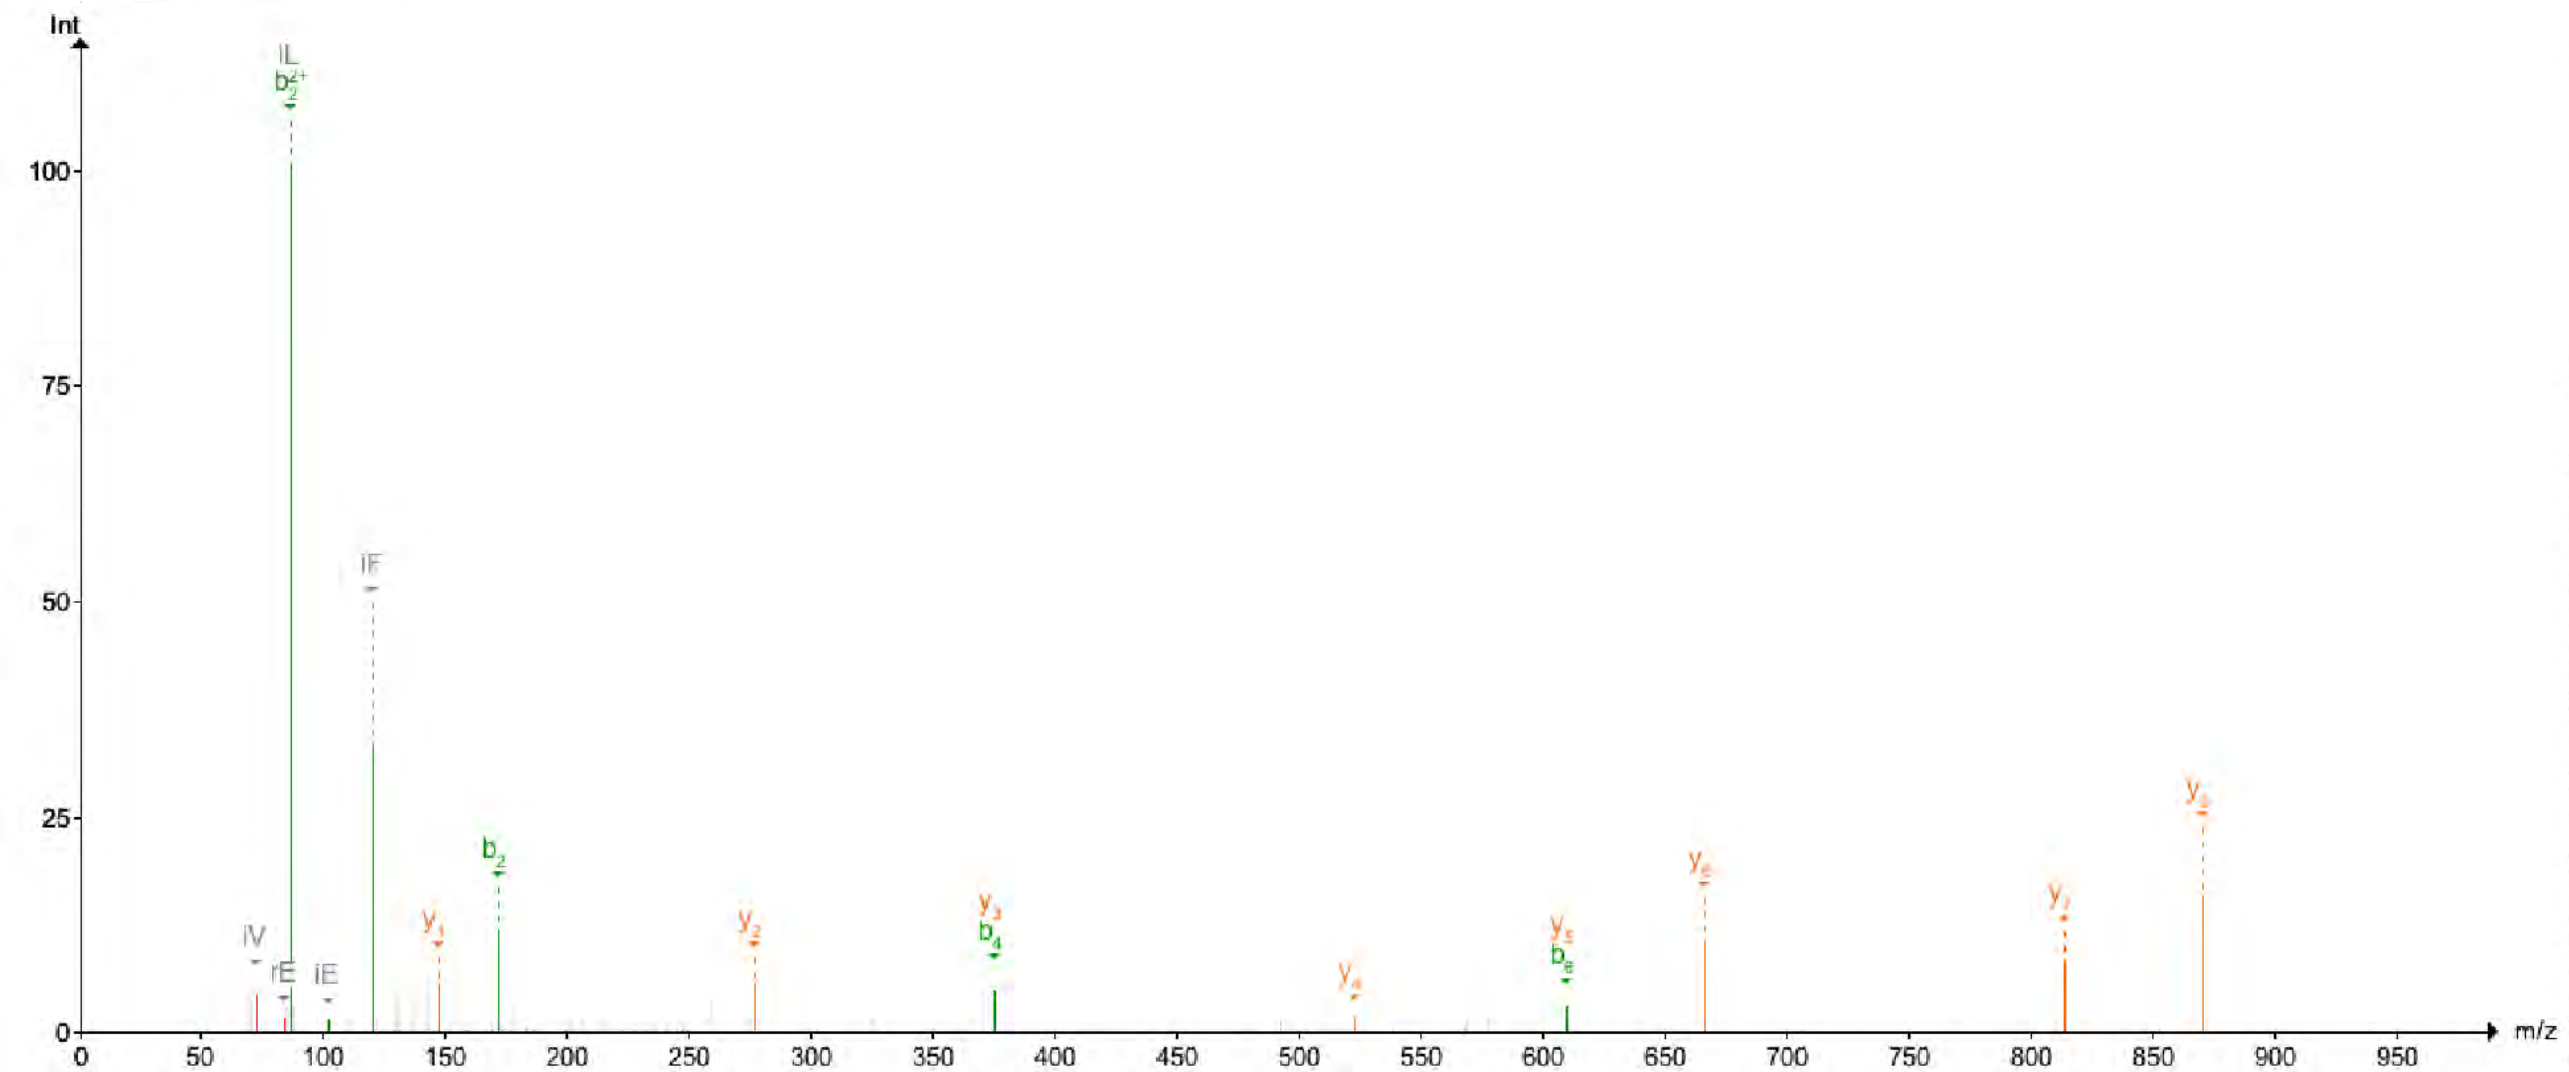

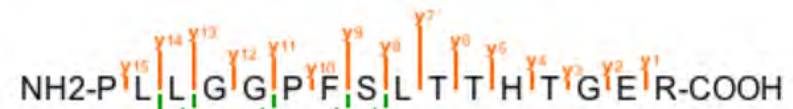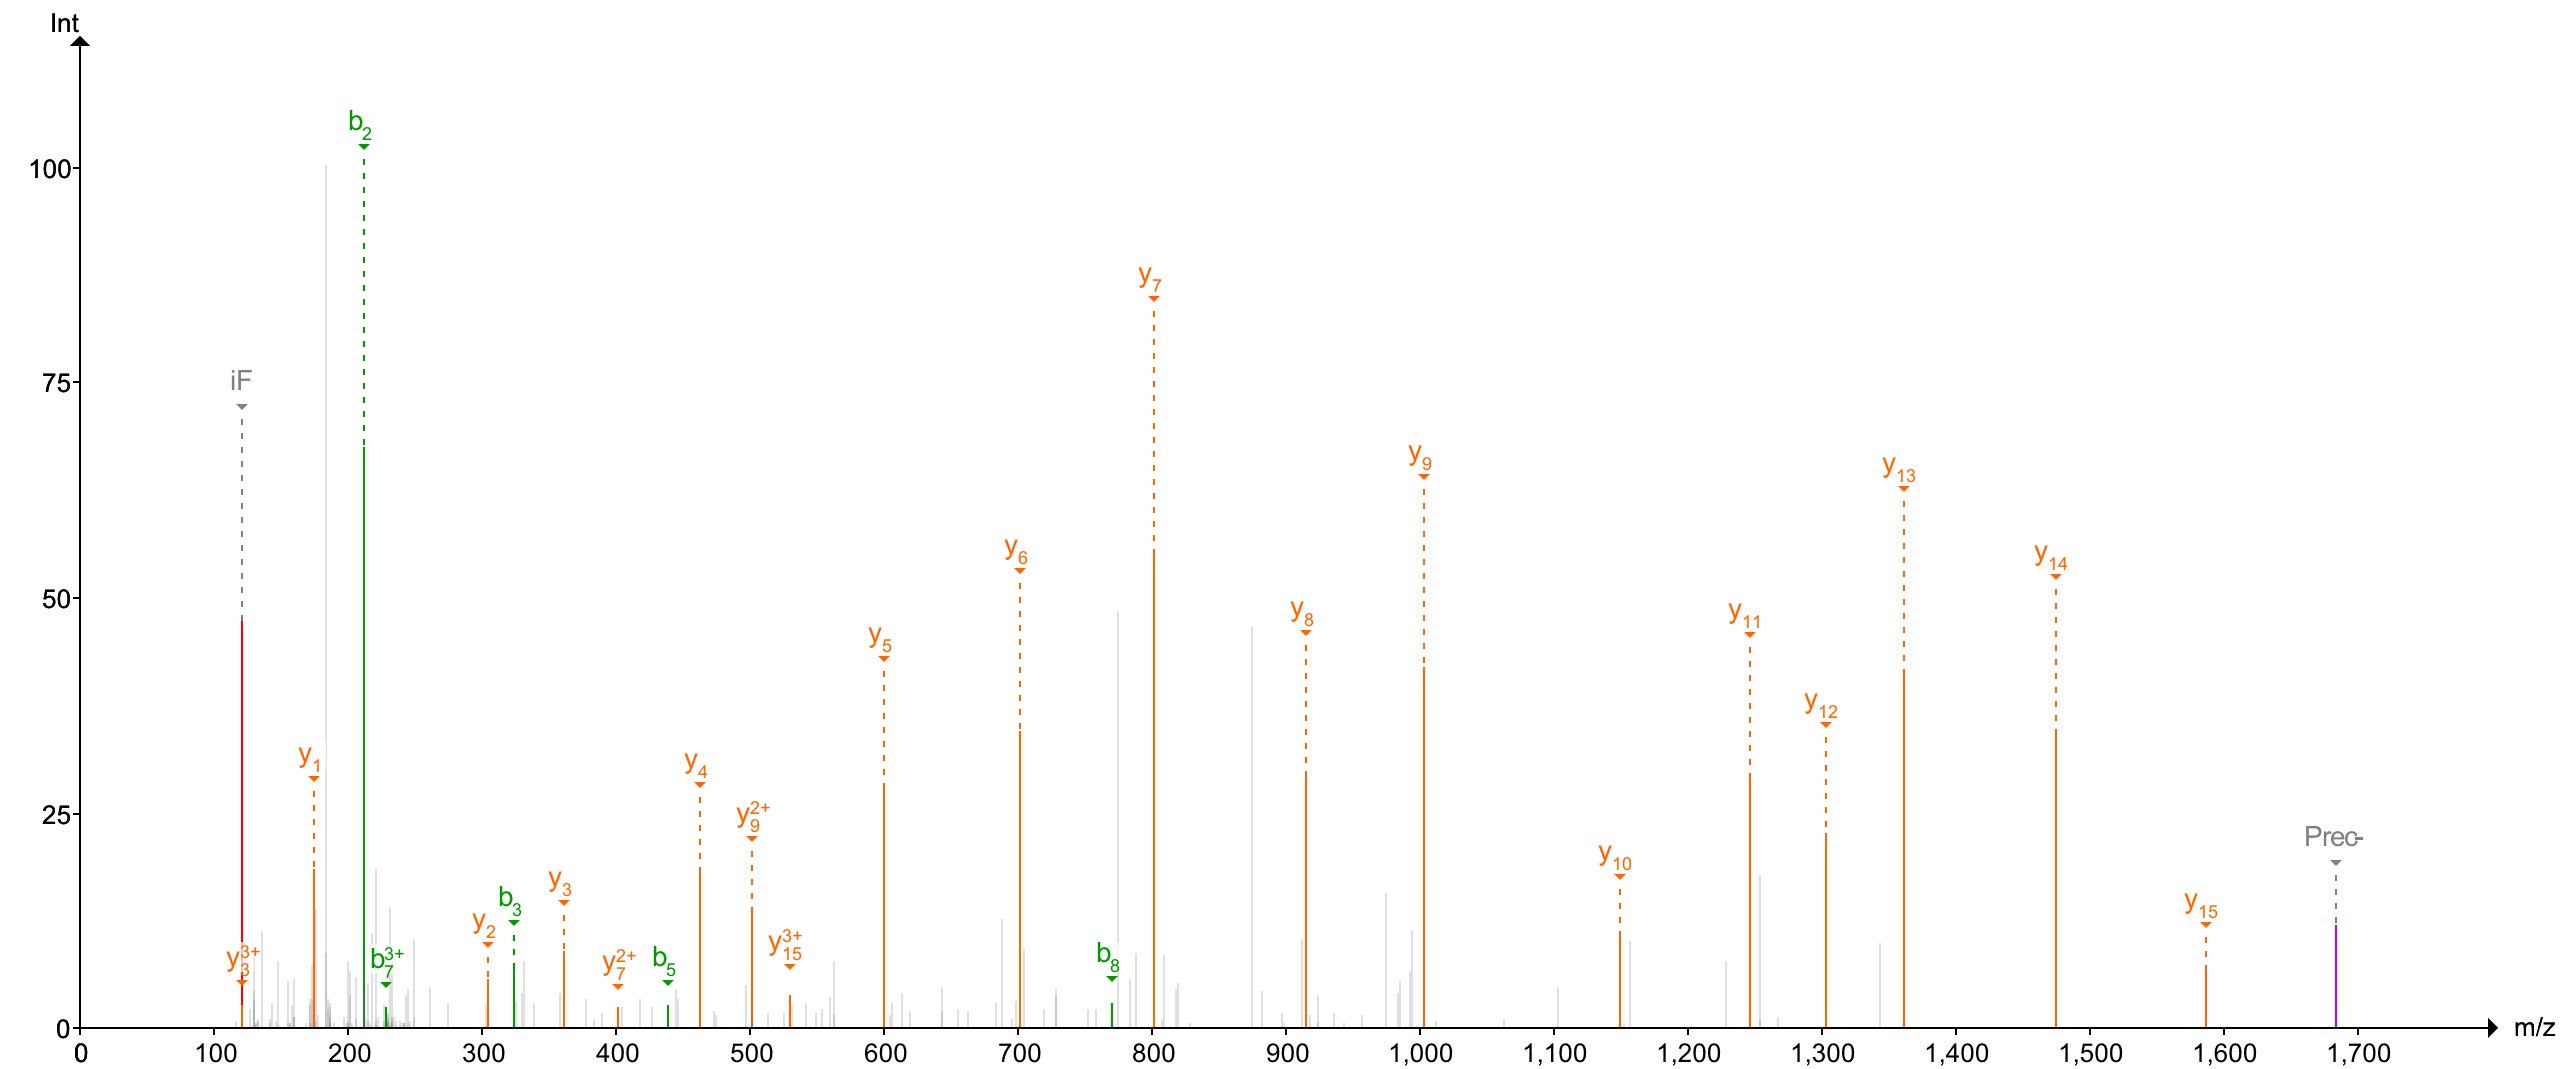

NH<sub>2</sub>-L I D F G L A R-COOH  
y<sub>7</sub> y<sub>6</sub> y<sub>5</sub> y<sub>4</sub> y<sub>2</sub> y<sub>1</sub>  
b<sub>2</sub> b<sub>3</sub>

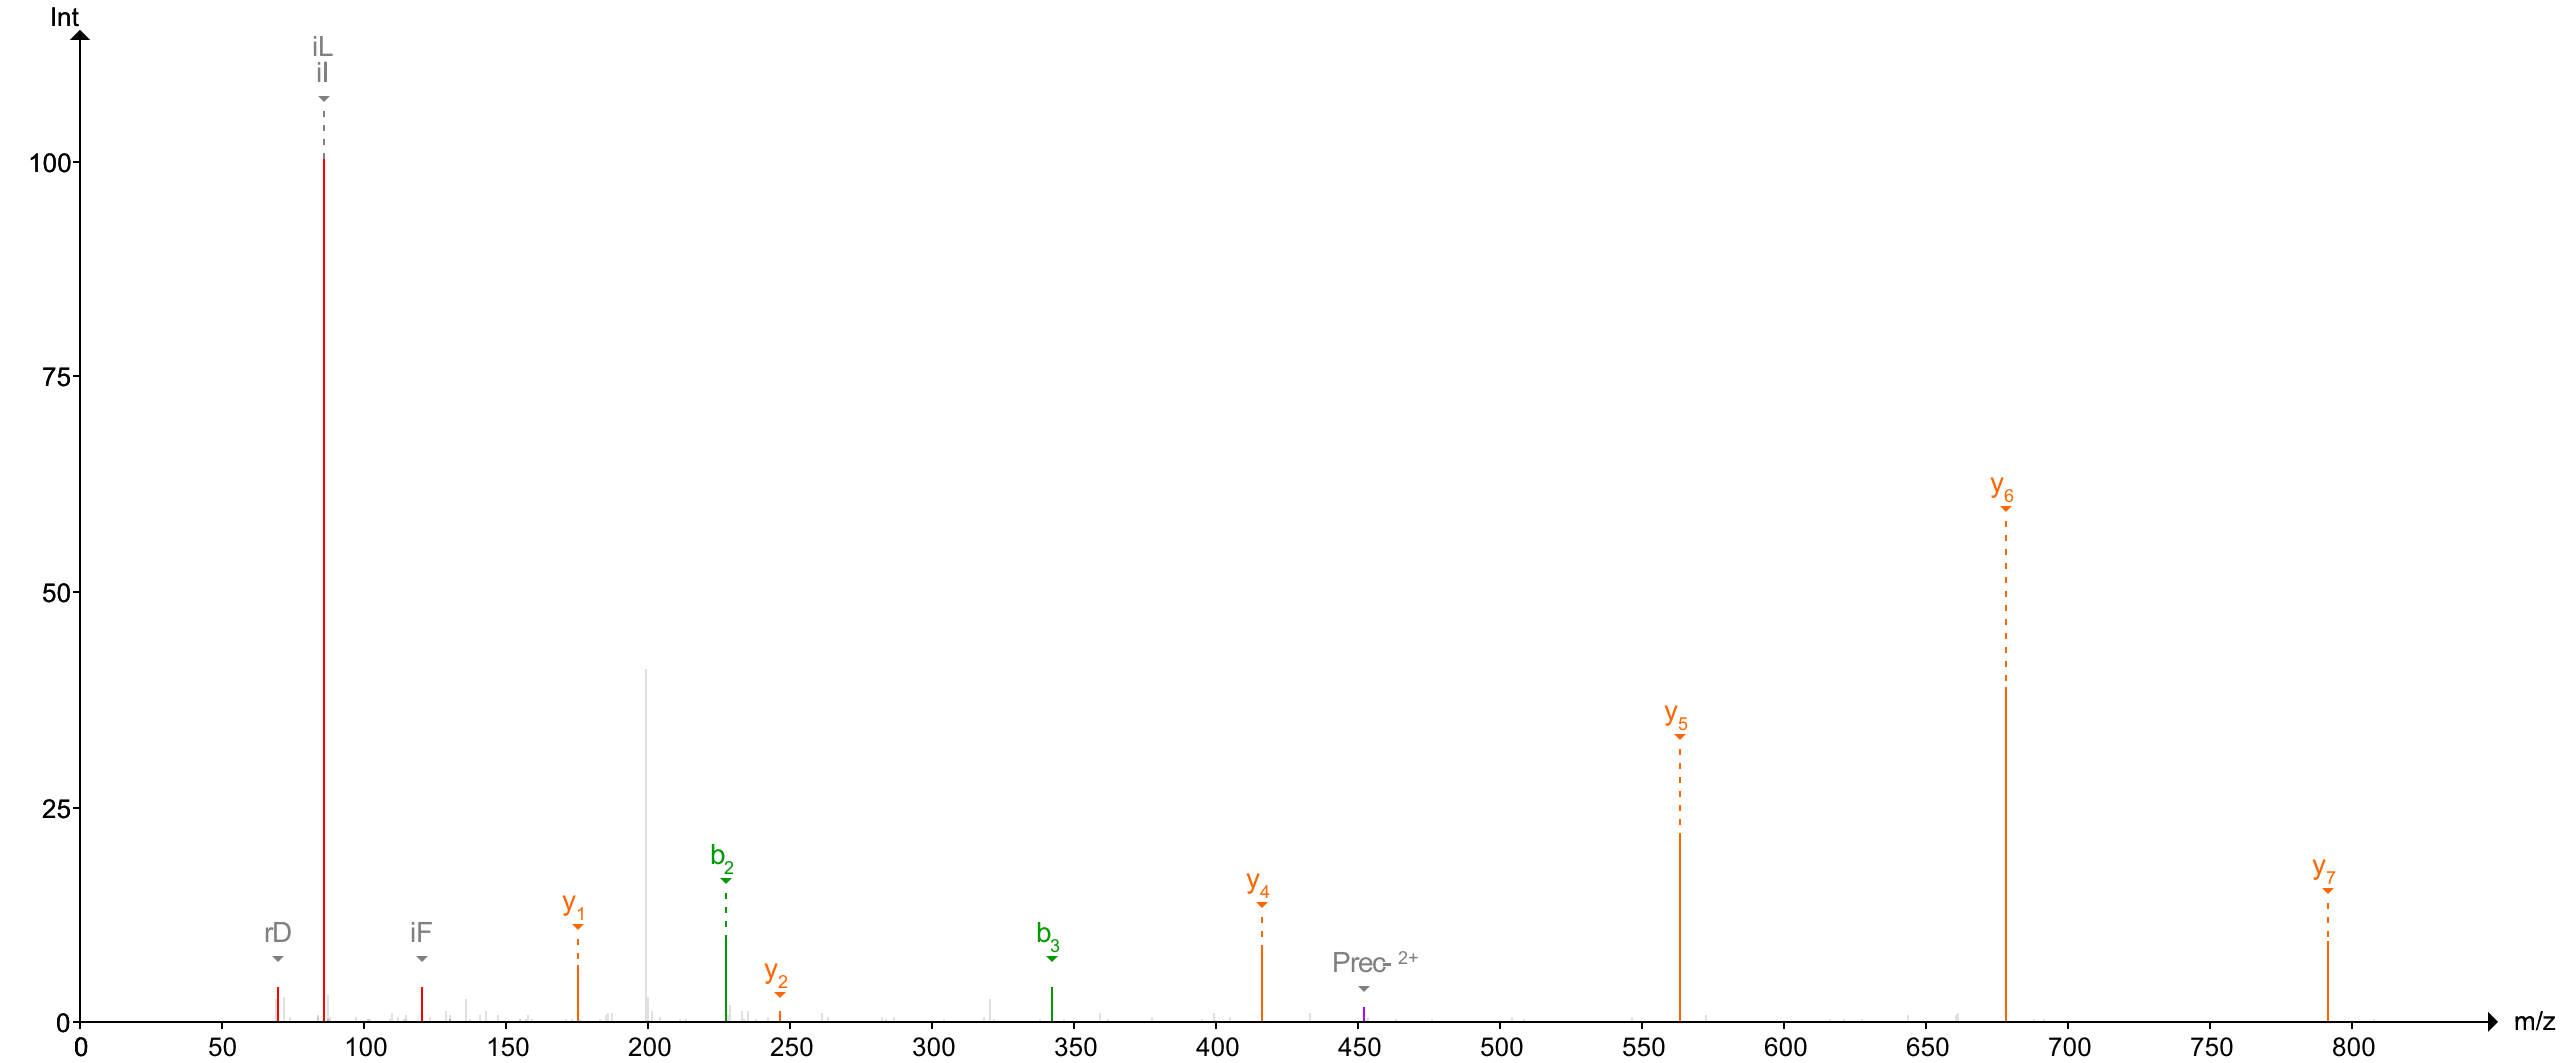

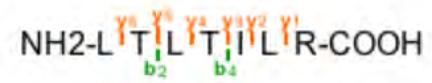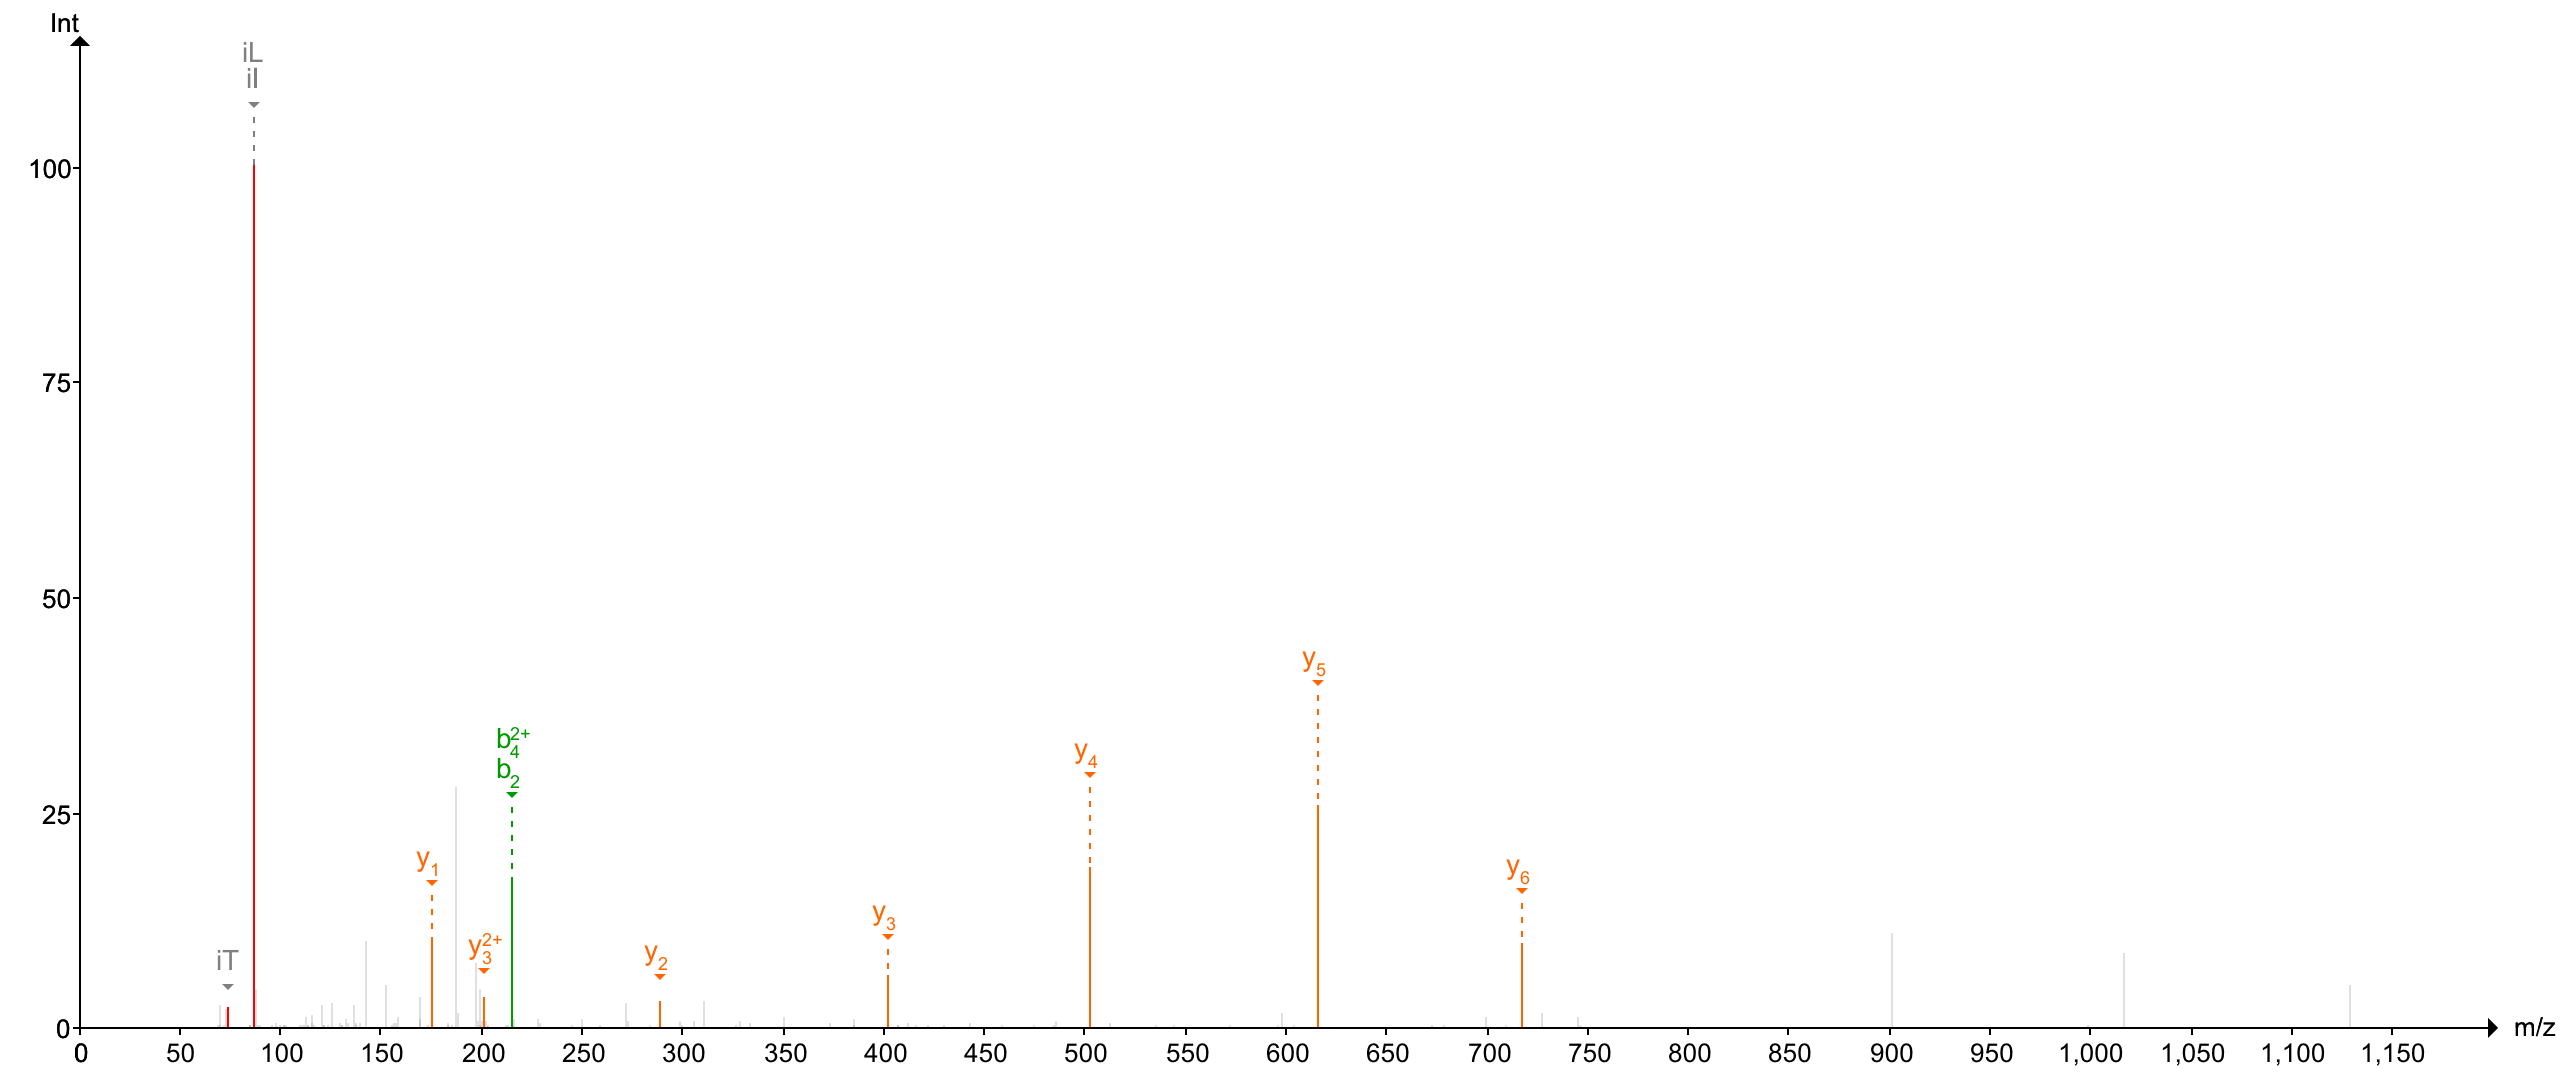



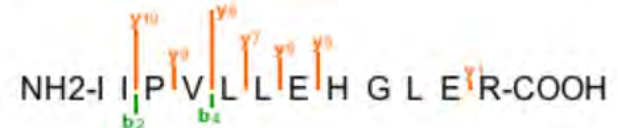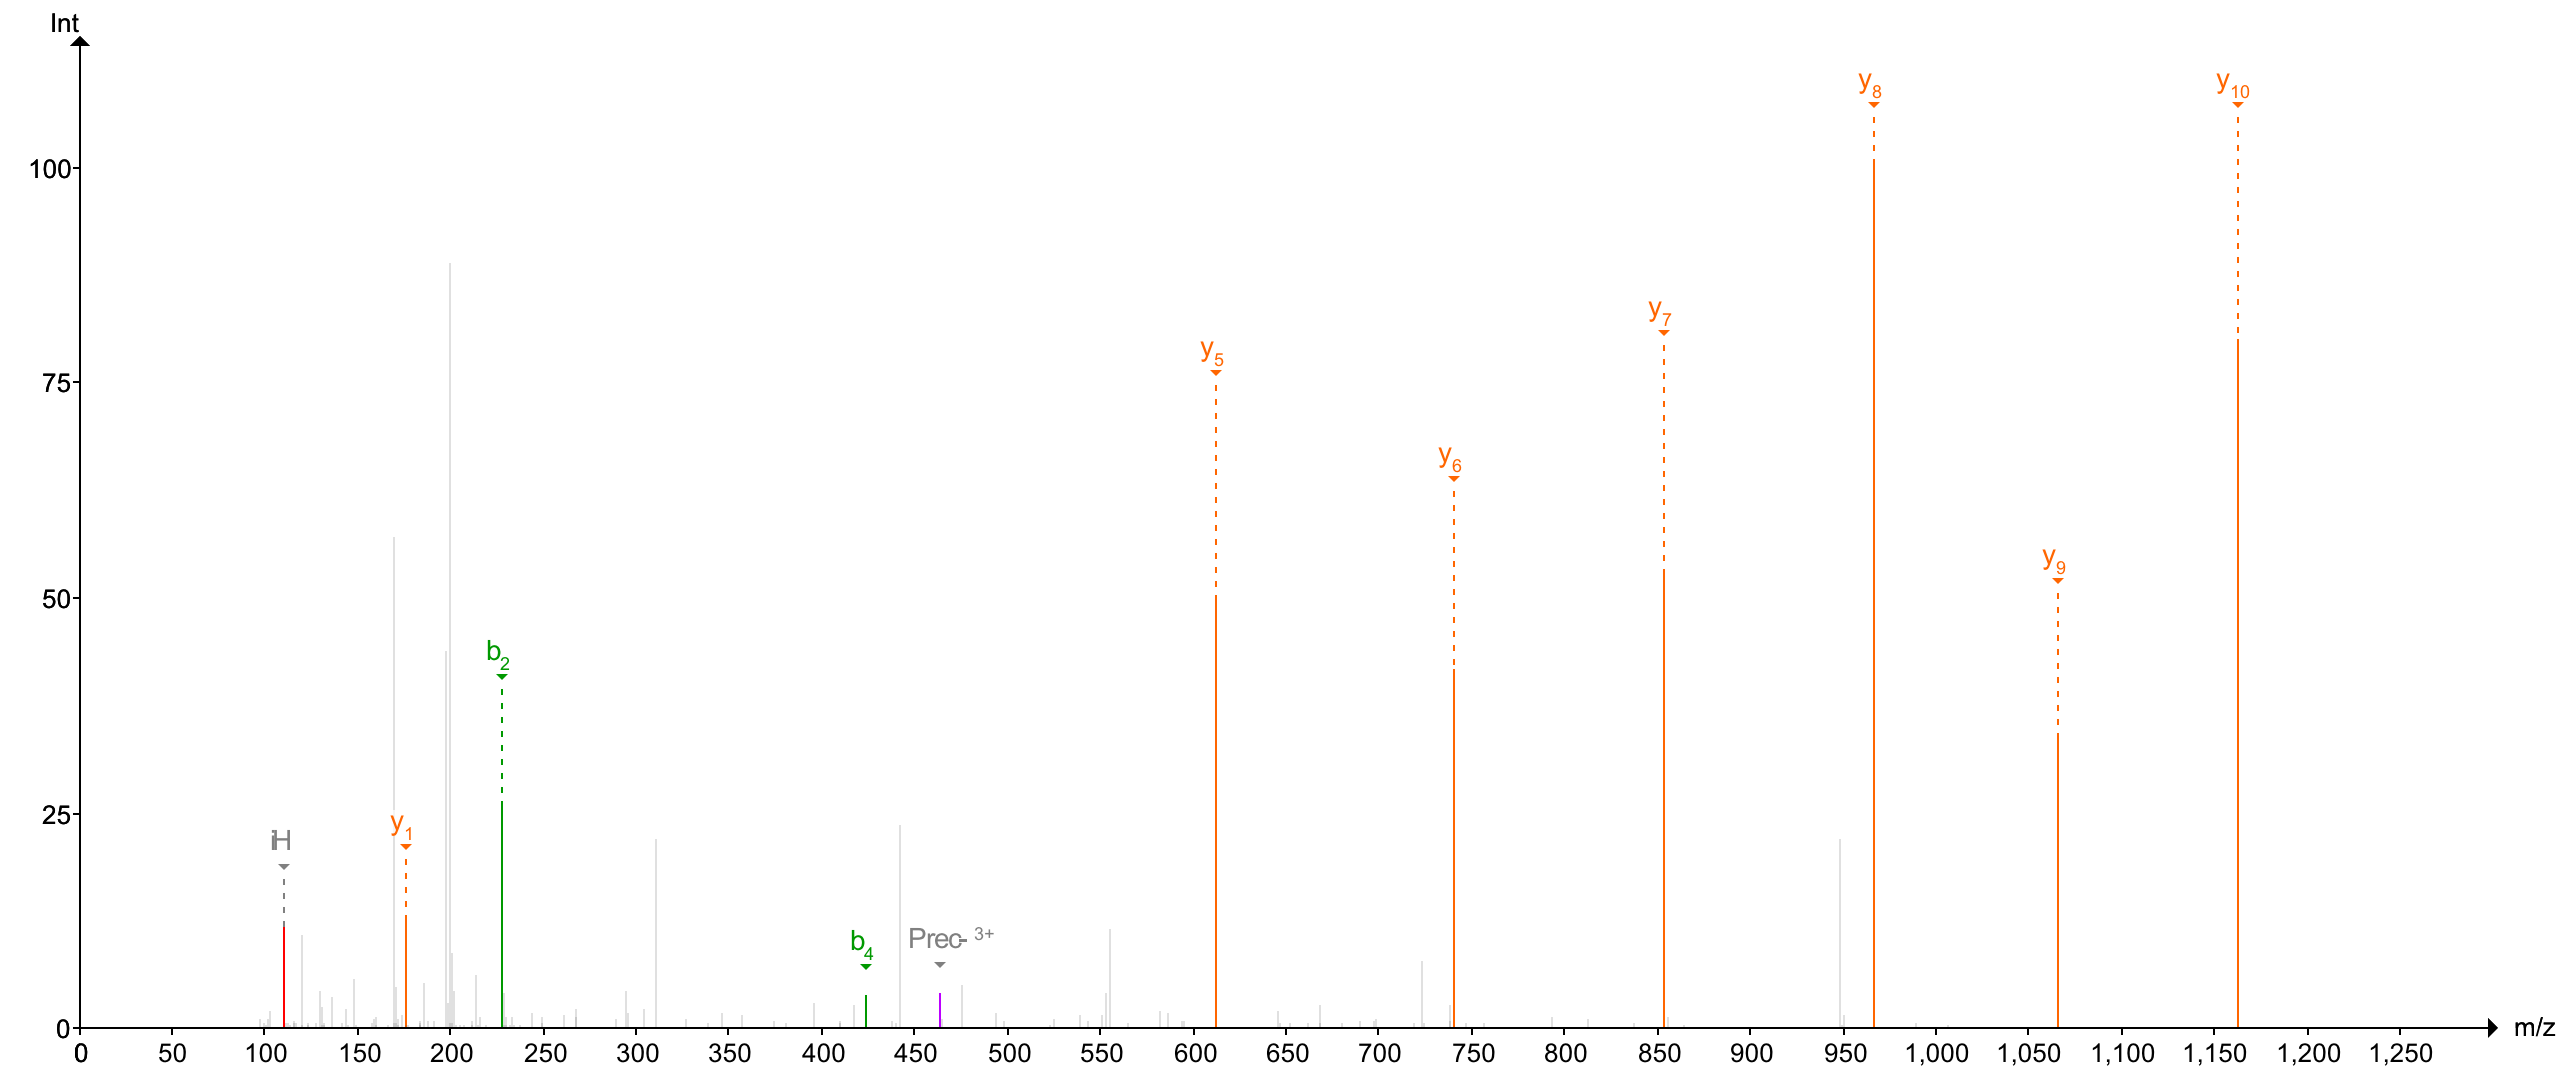

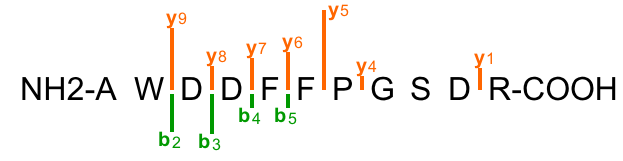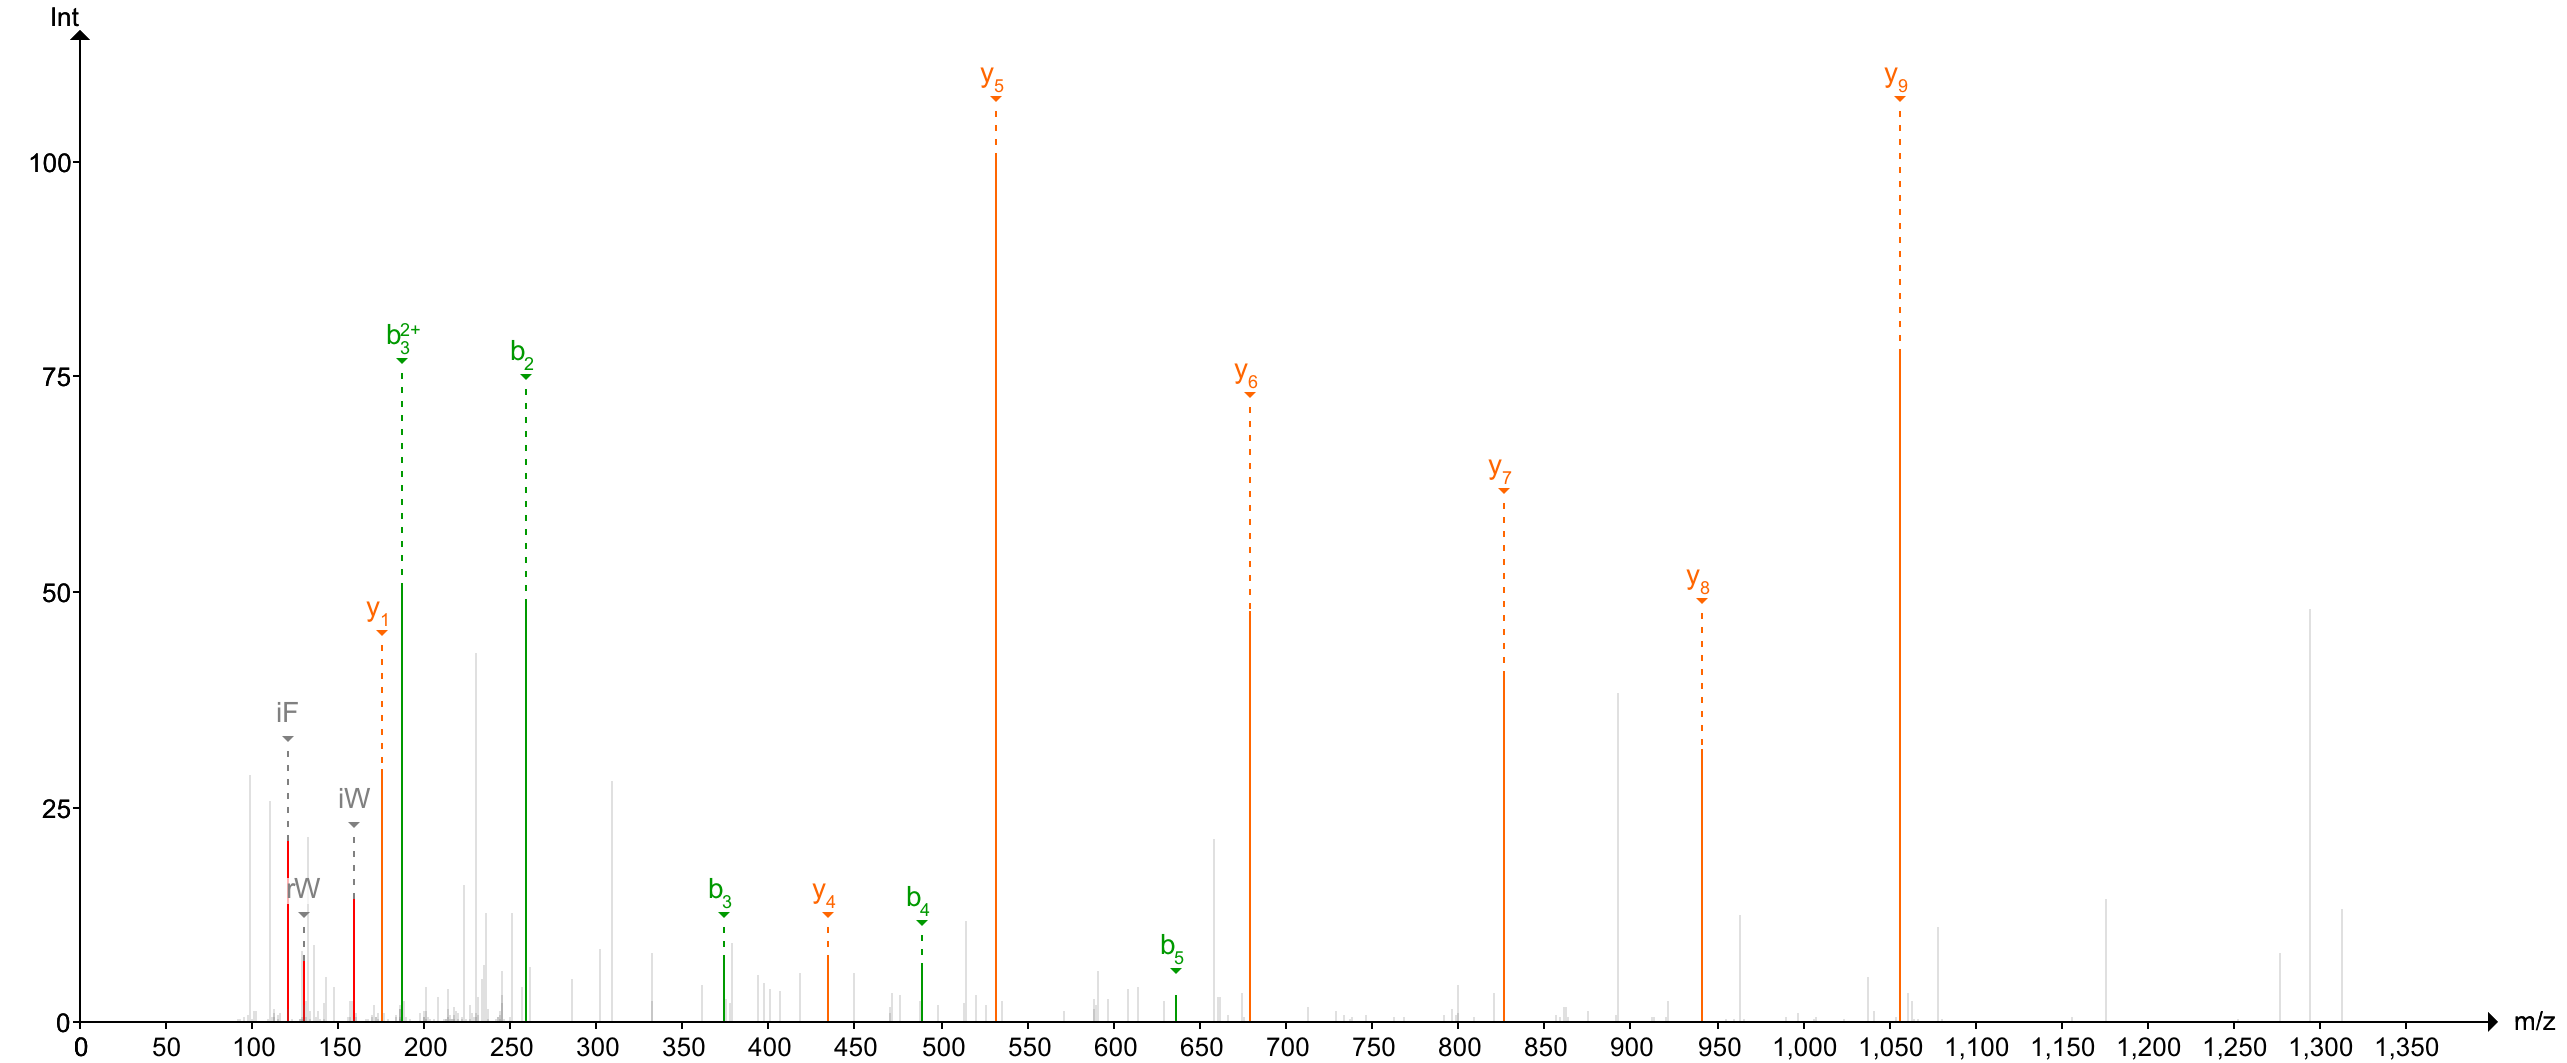

NH<sub>2</sub>-L<sup>y<sub>6</sub></sup>S<sup>y<sub>5</sub></sup>L<sup>y<sub>4</sub></sup>L<sup>y<sub>3</sub></sup>V<sup>y<sub>2</sub></sup>L<sup>y<sub>1</sub></sup>-R-COOH  
b<sub>2</sub> b<sub>3</sub>

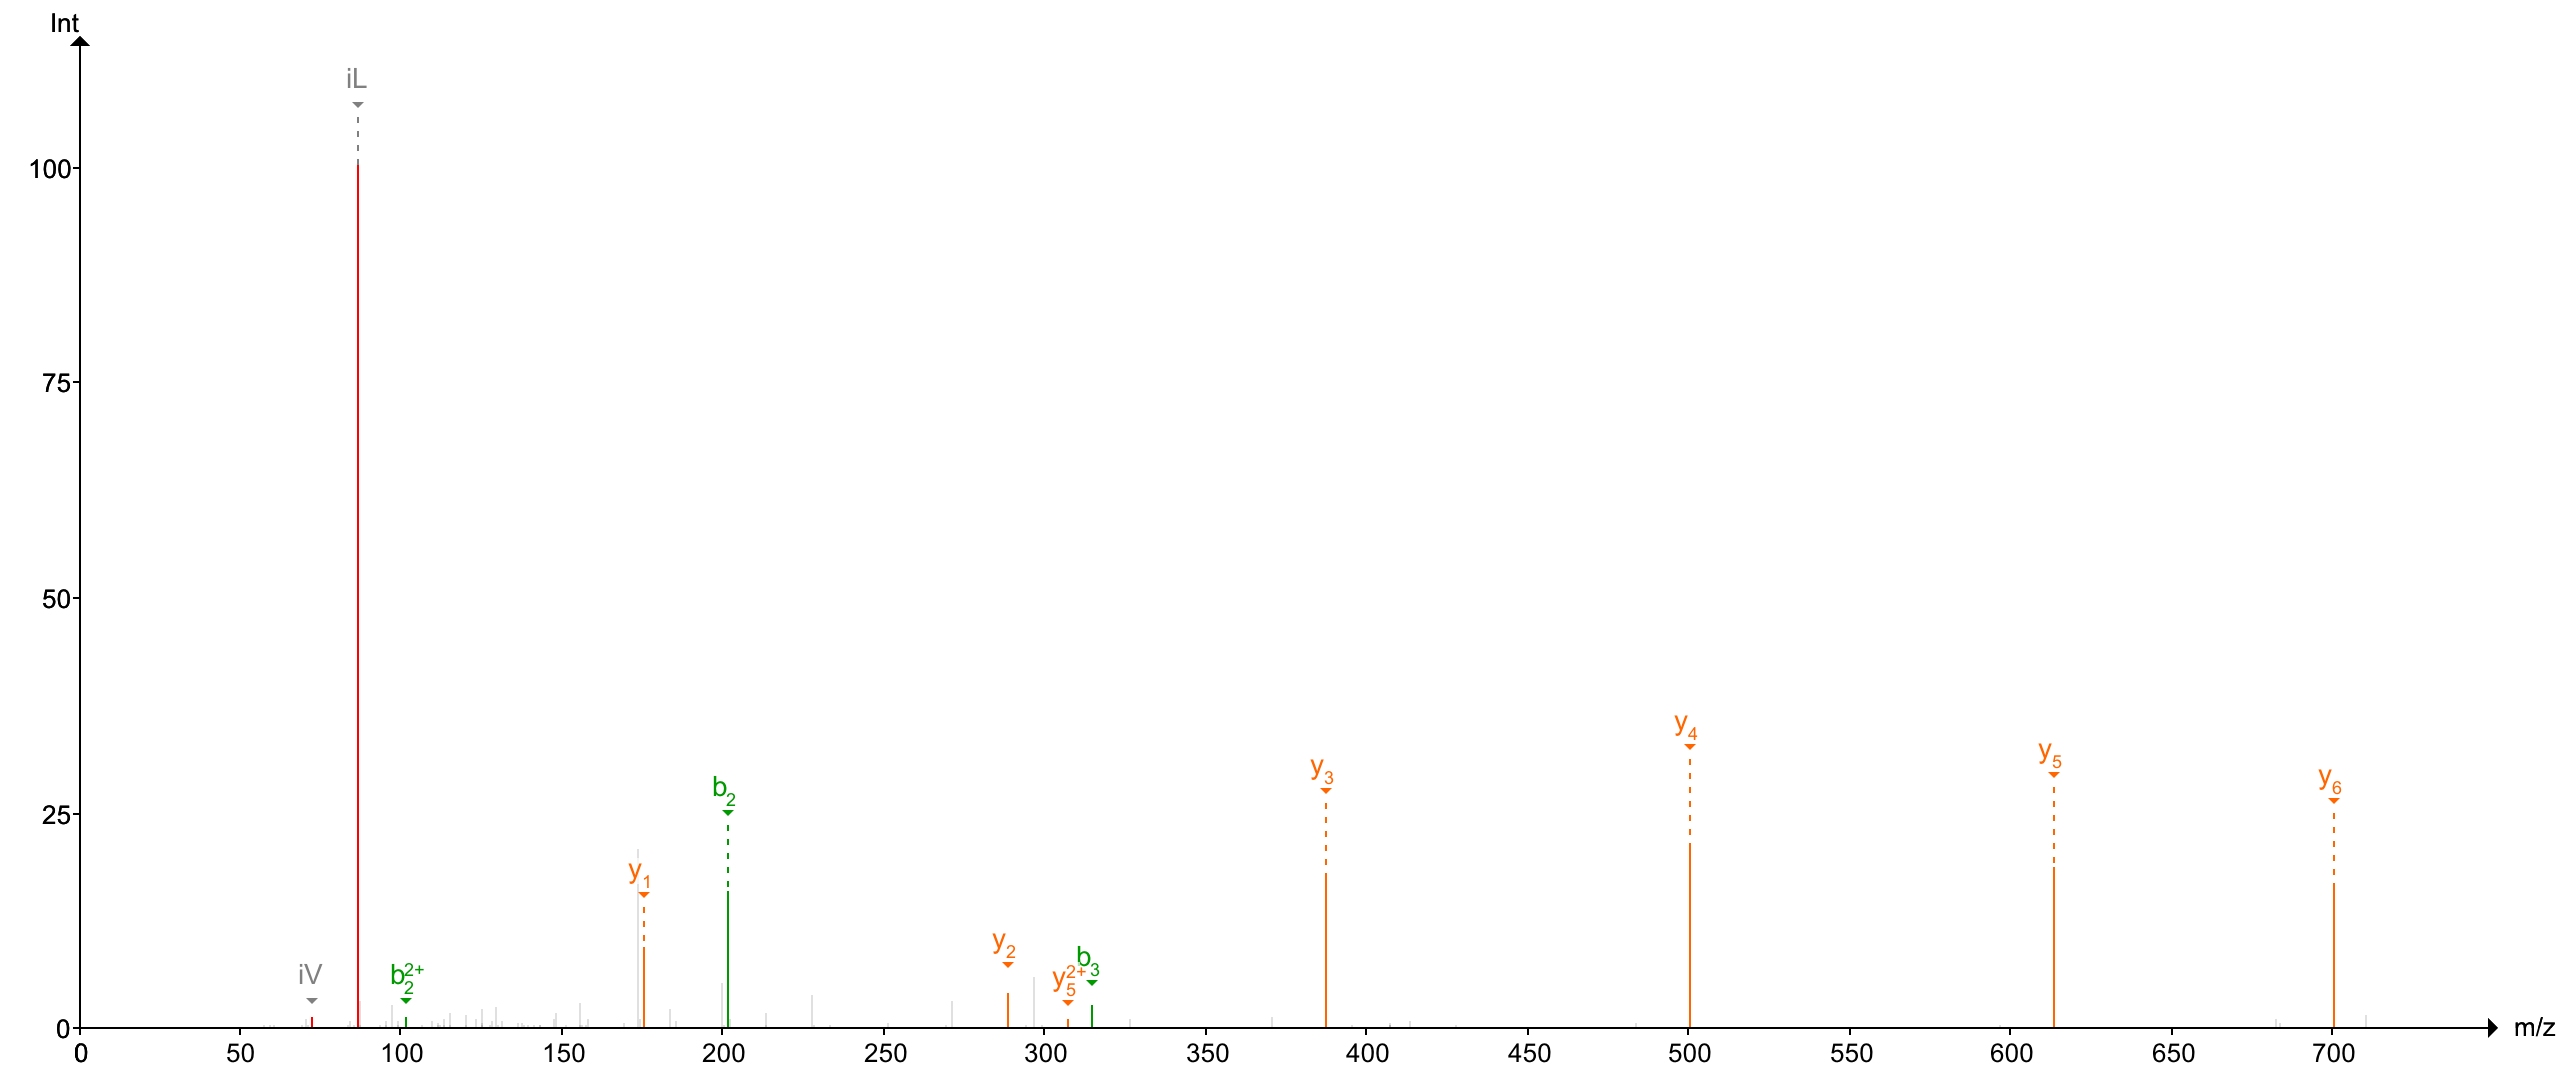

NH<sub>2</sub>-L G<sub>1</sub>F<sub>2</sub>E D<sub>1</sub>V<sub>12</sub>I<sub>11</sub>A<sub>10</sub>E P<sub>1</sub>V<sub>8</sub>T<sub>7</sub>T<sub>6</sub>H<sub>5</sub>S<sub>4</sub>F<sub>3</sub>D<sub>1</sub>K-COOH

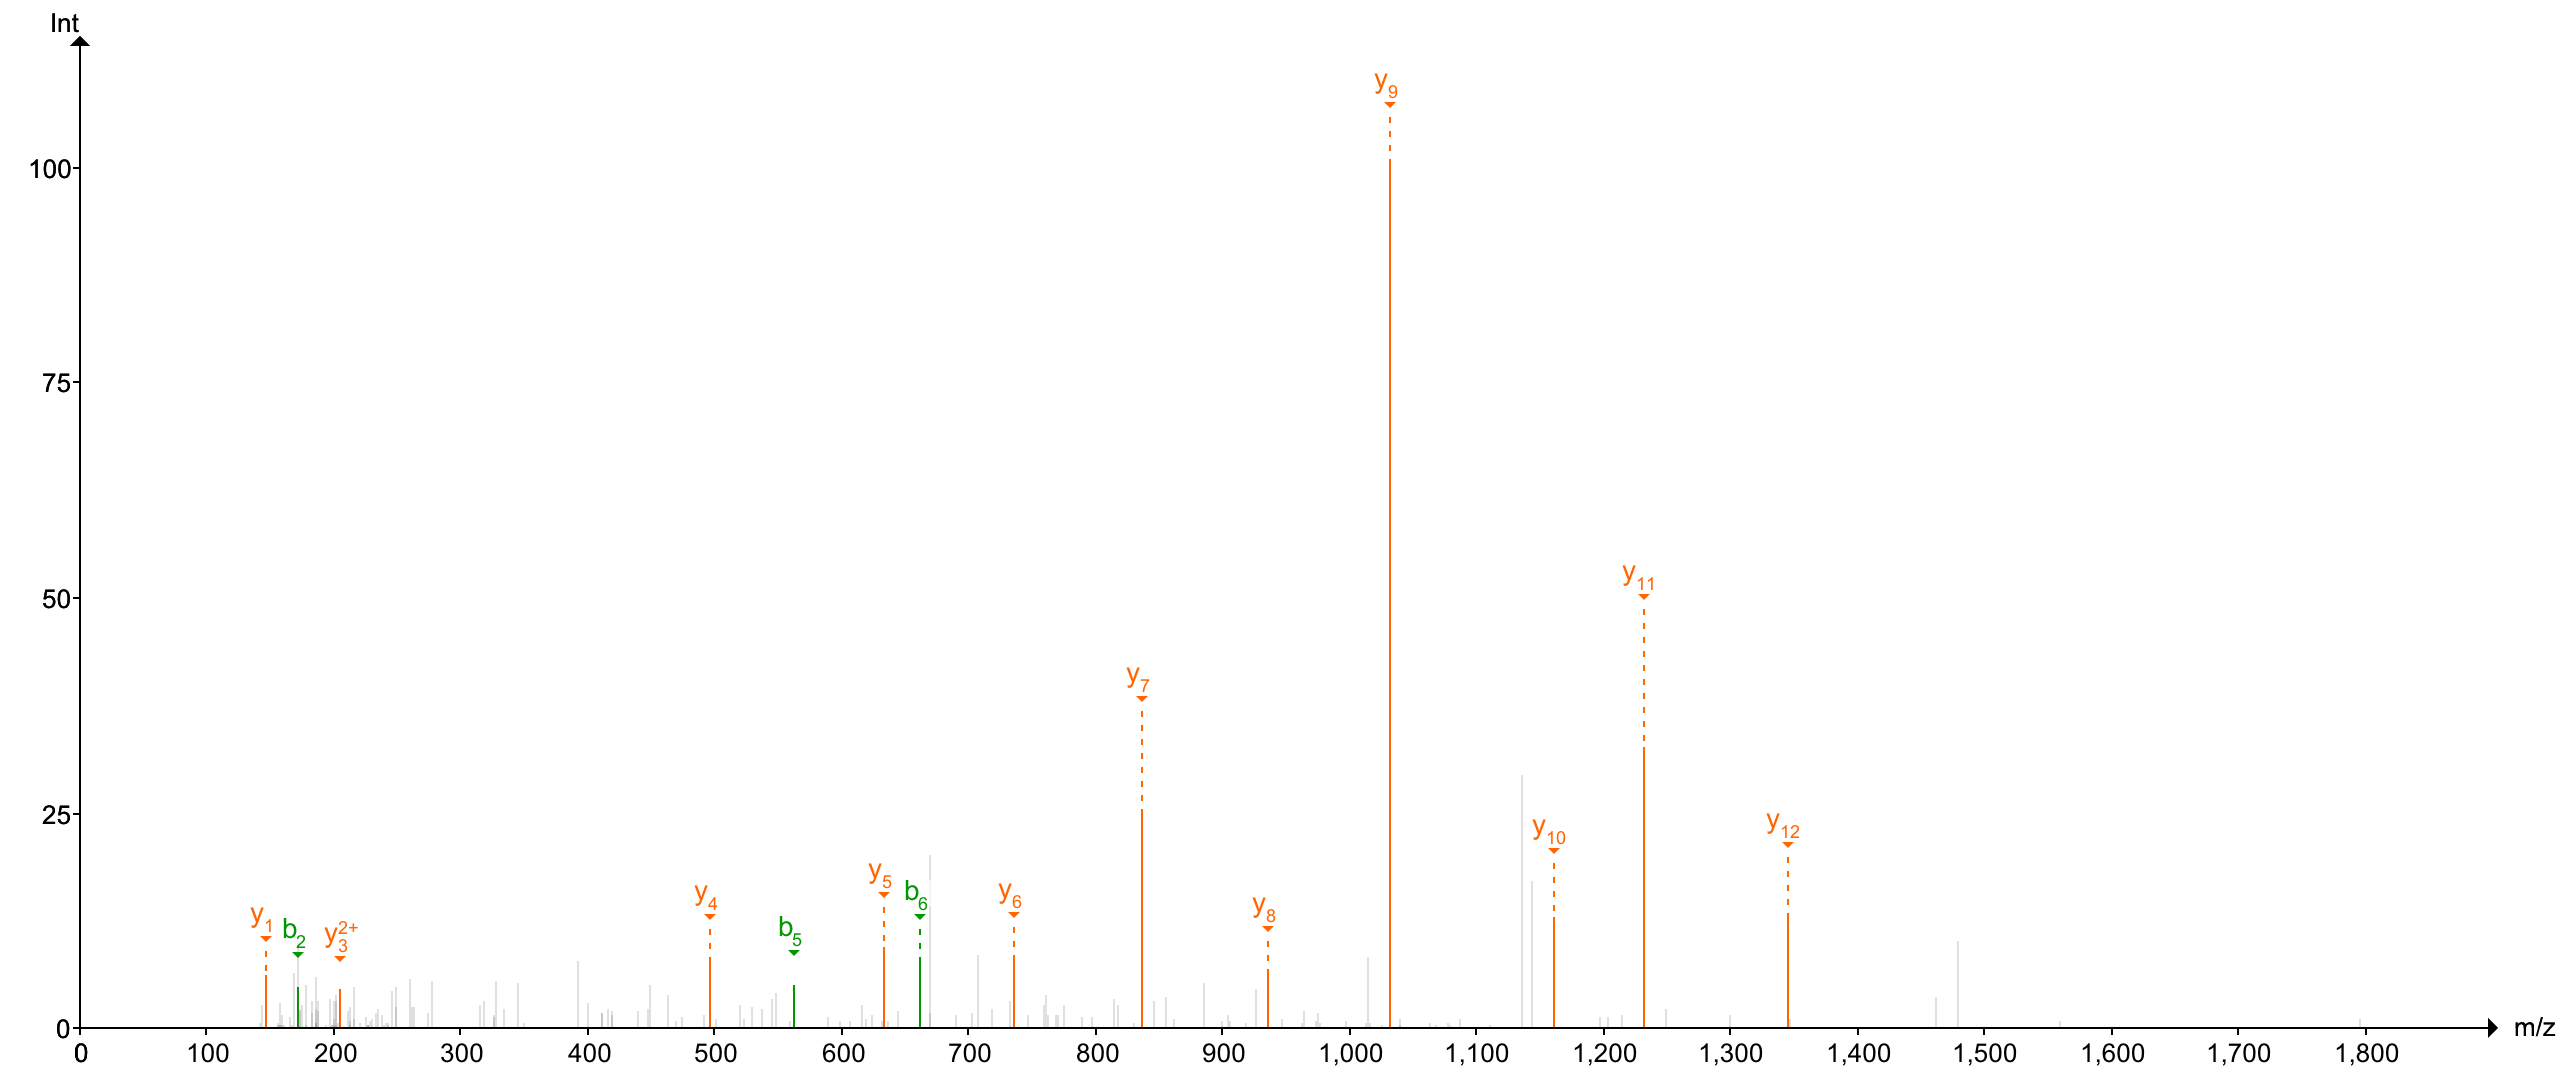

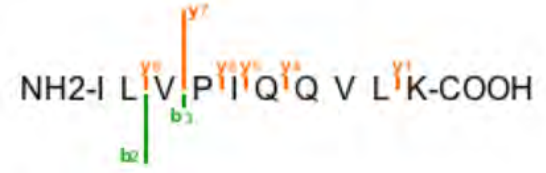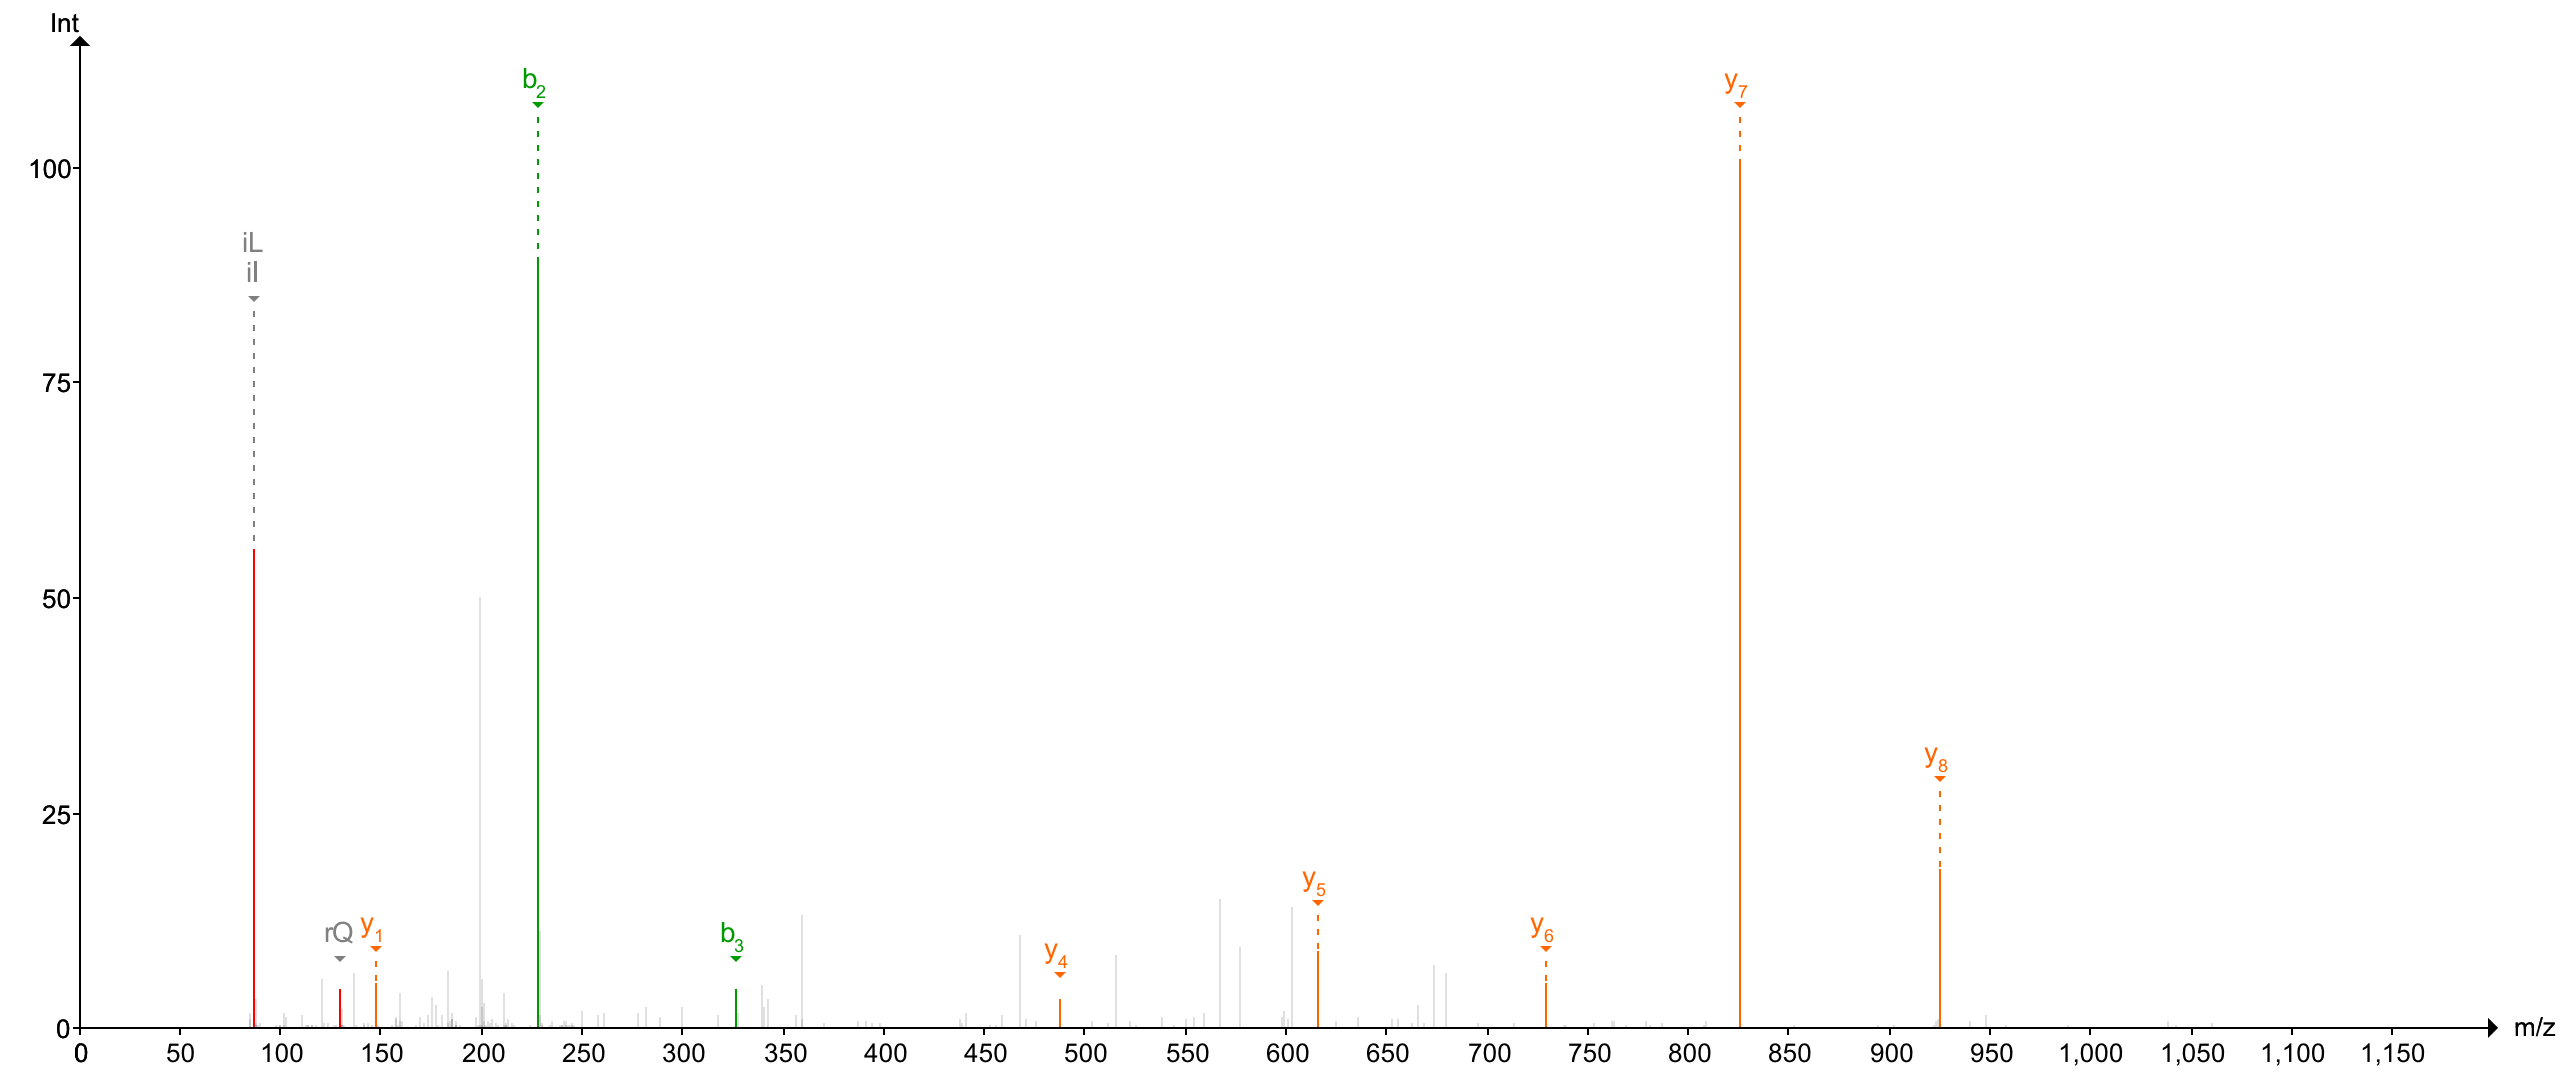

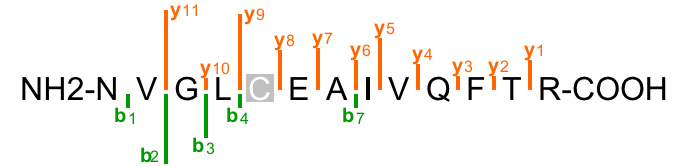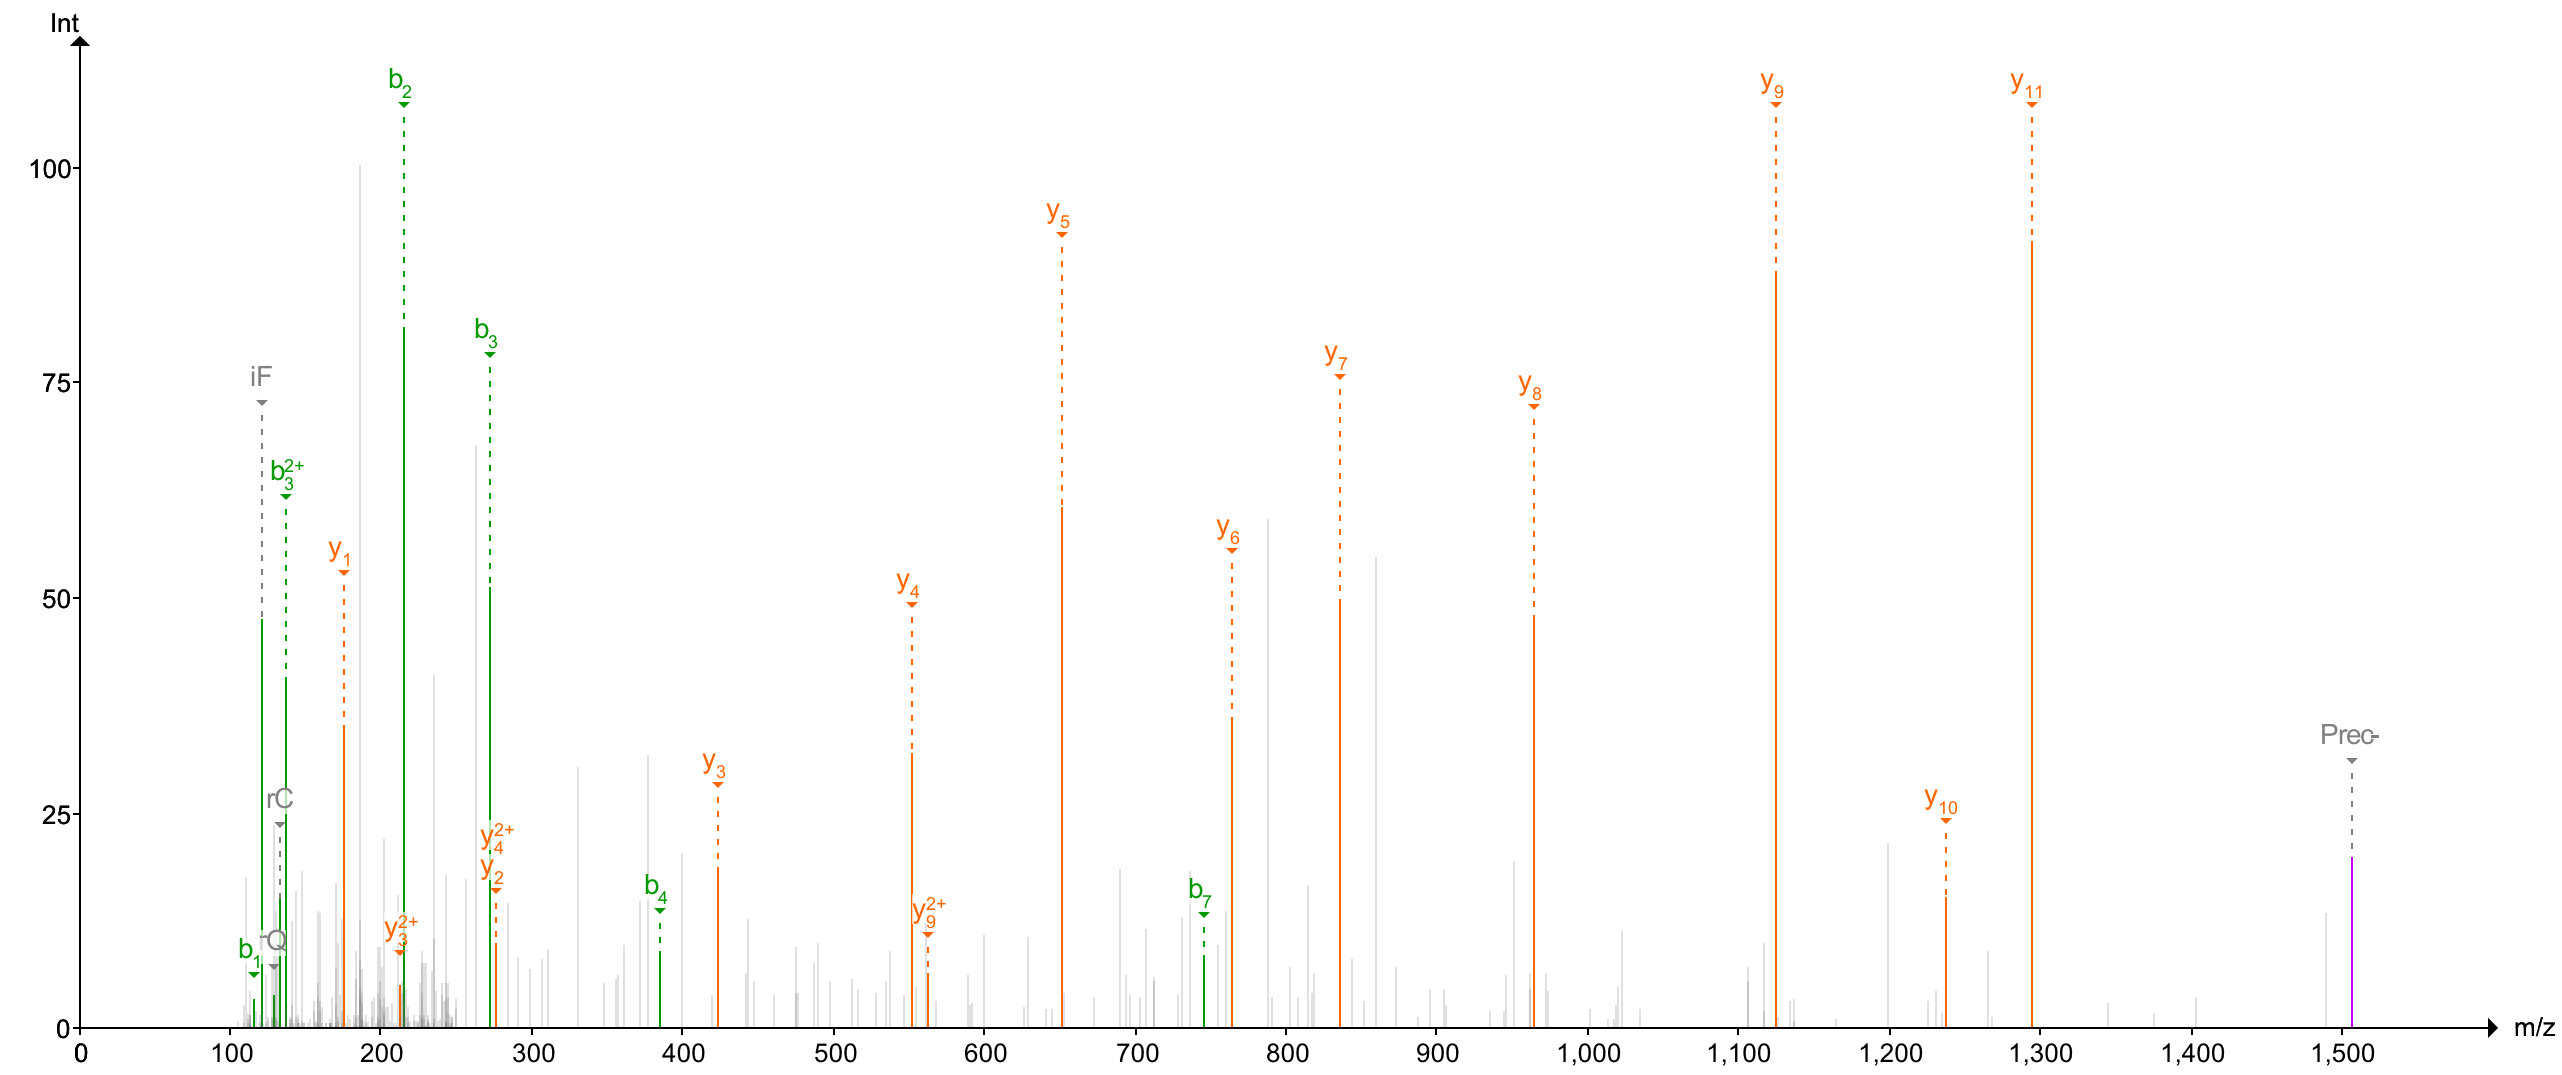

NH<sub>2</sub>-D A E G I L E D L Q S Y R-COOH

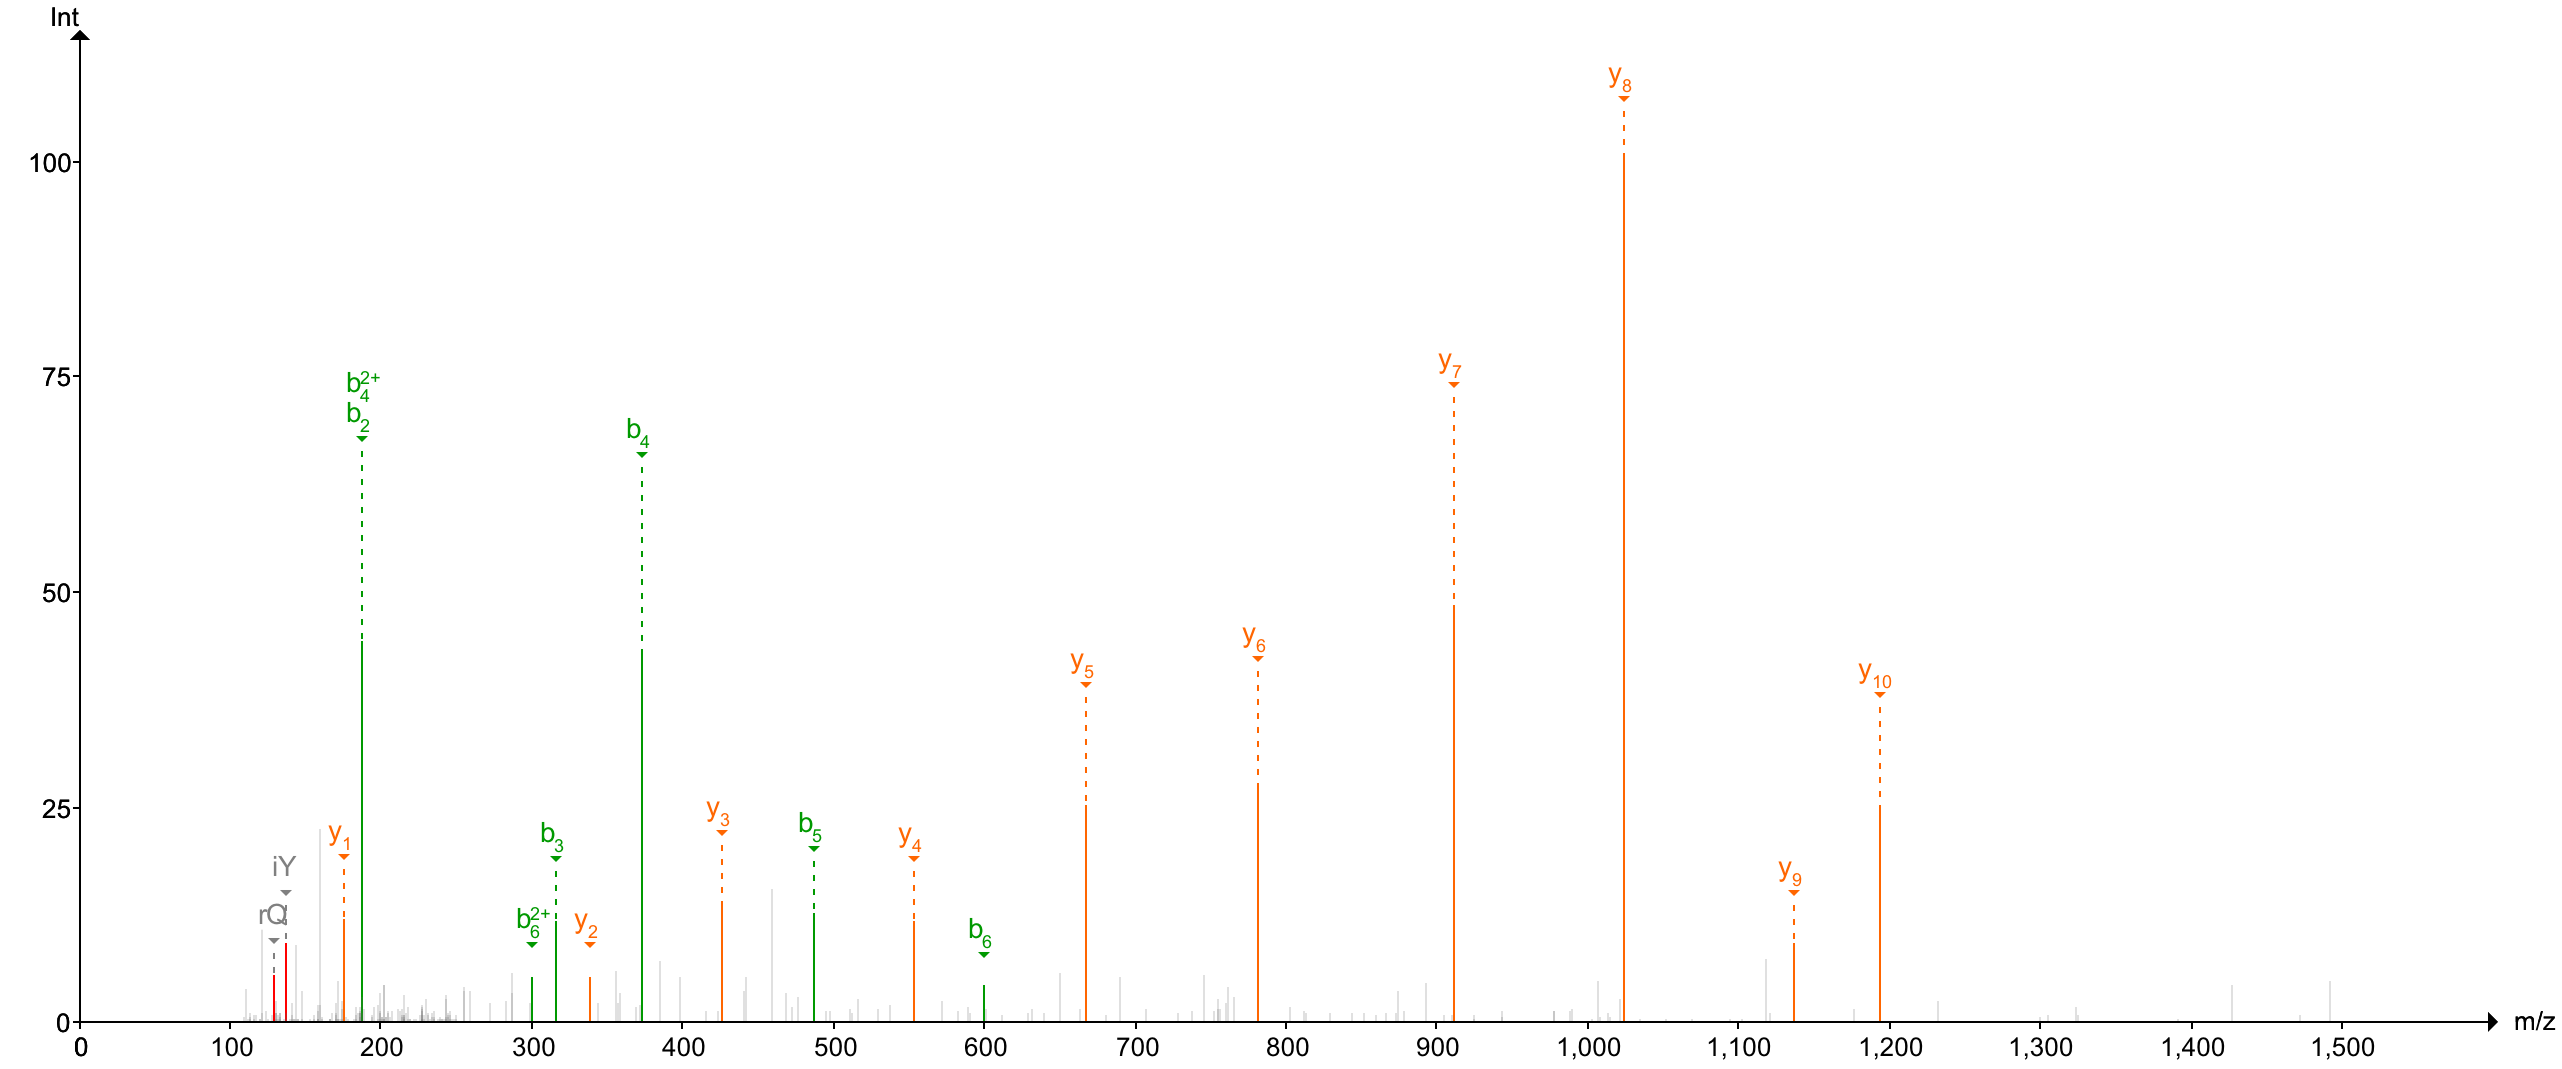

NH<sub>2</sub>-I E S L P P L L I G K-COOH

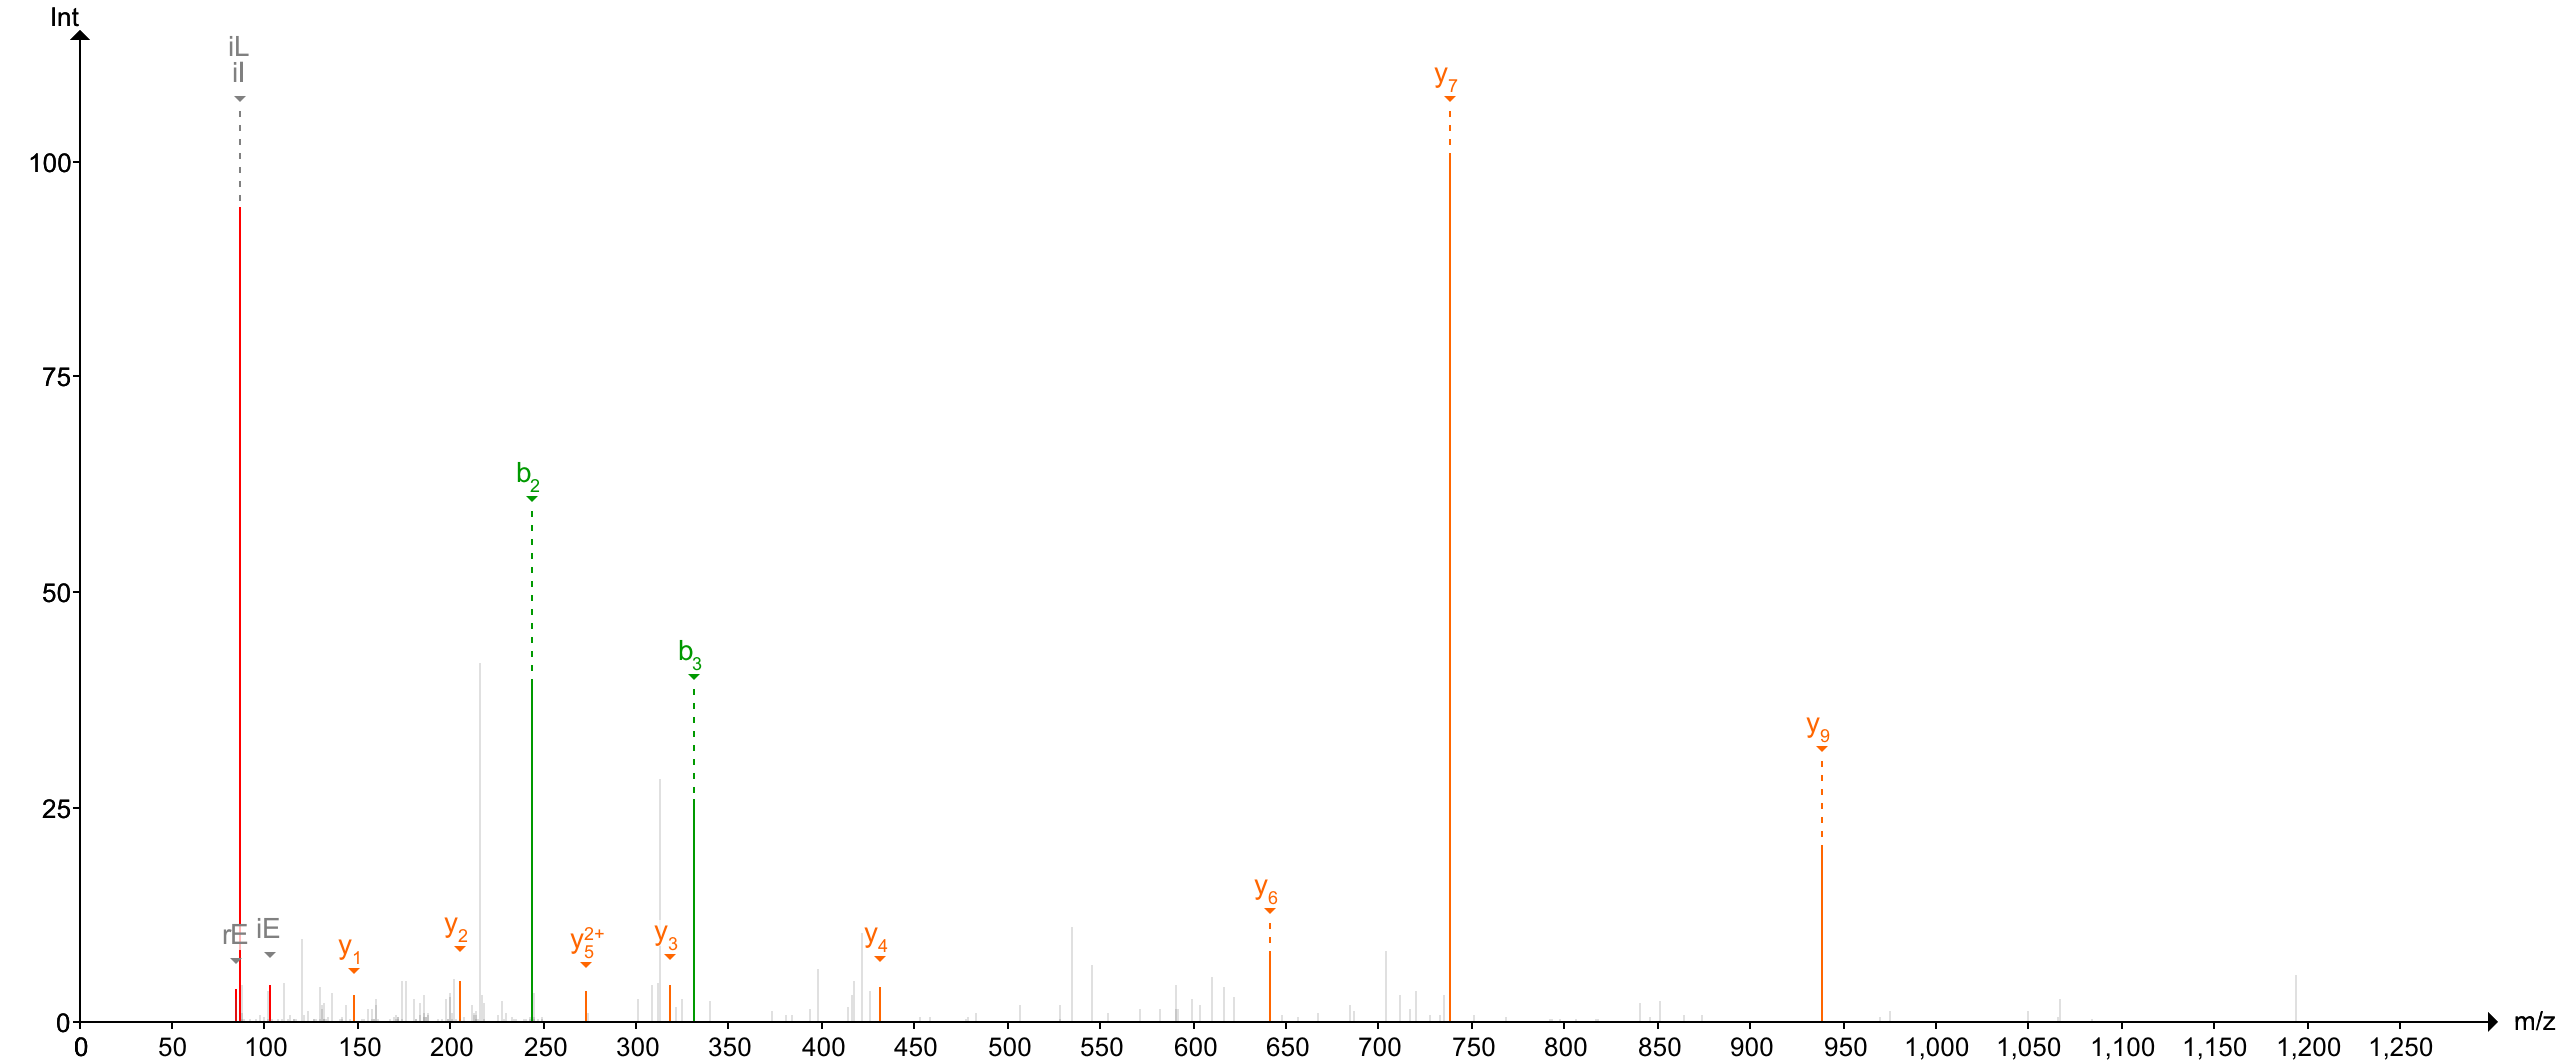



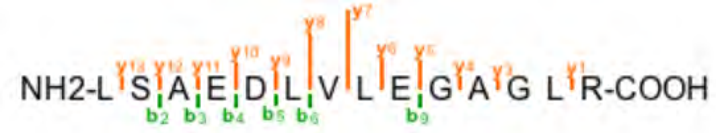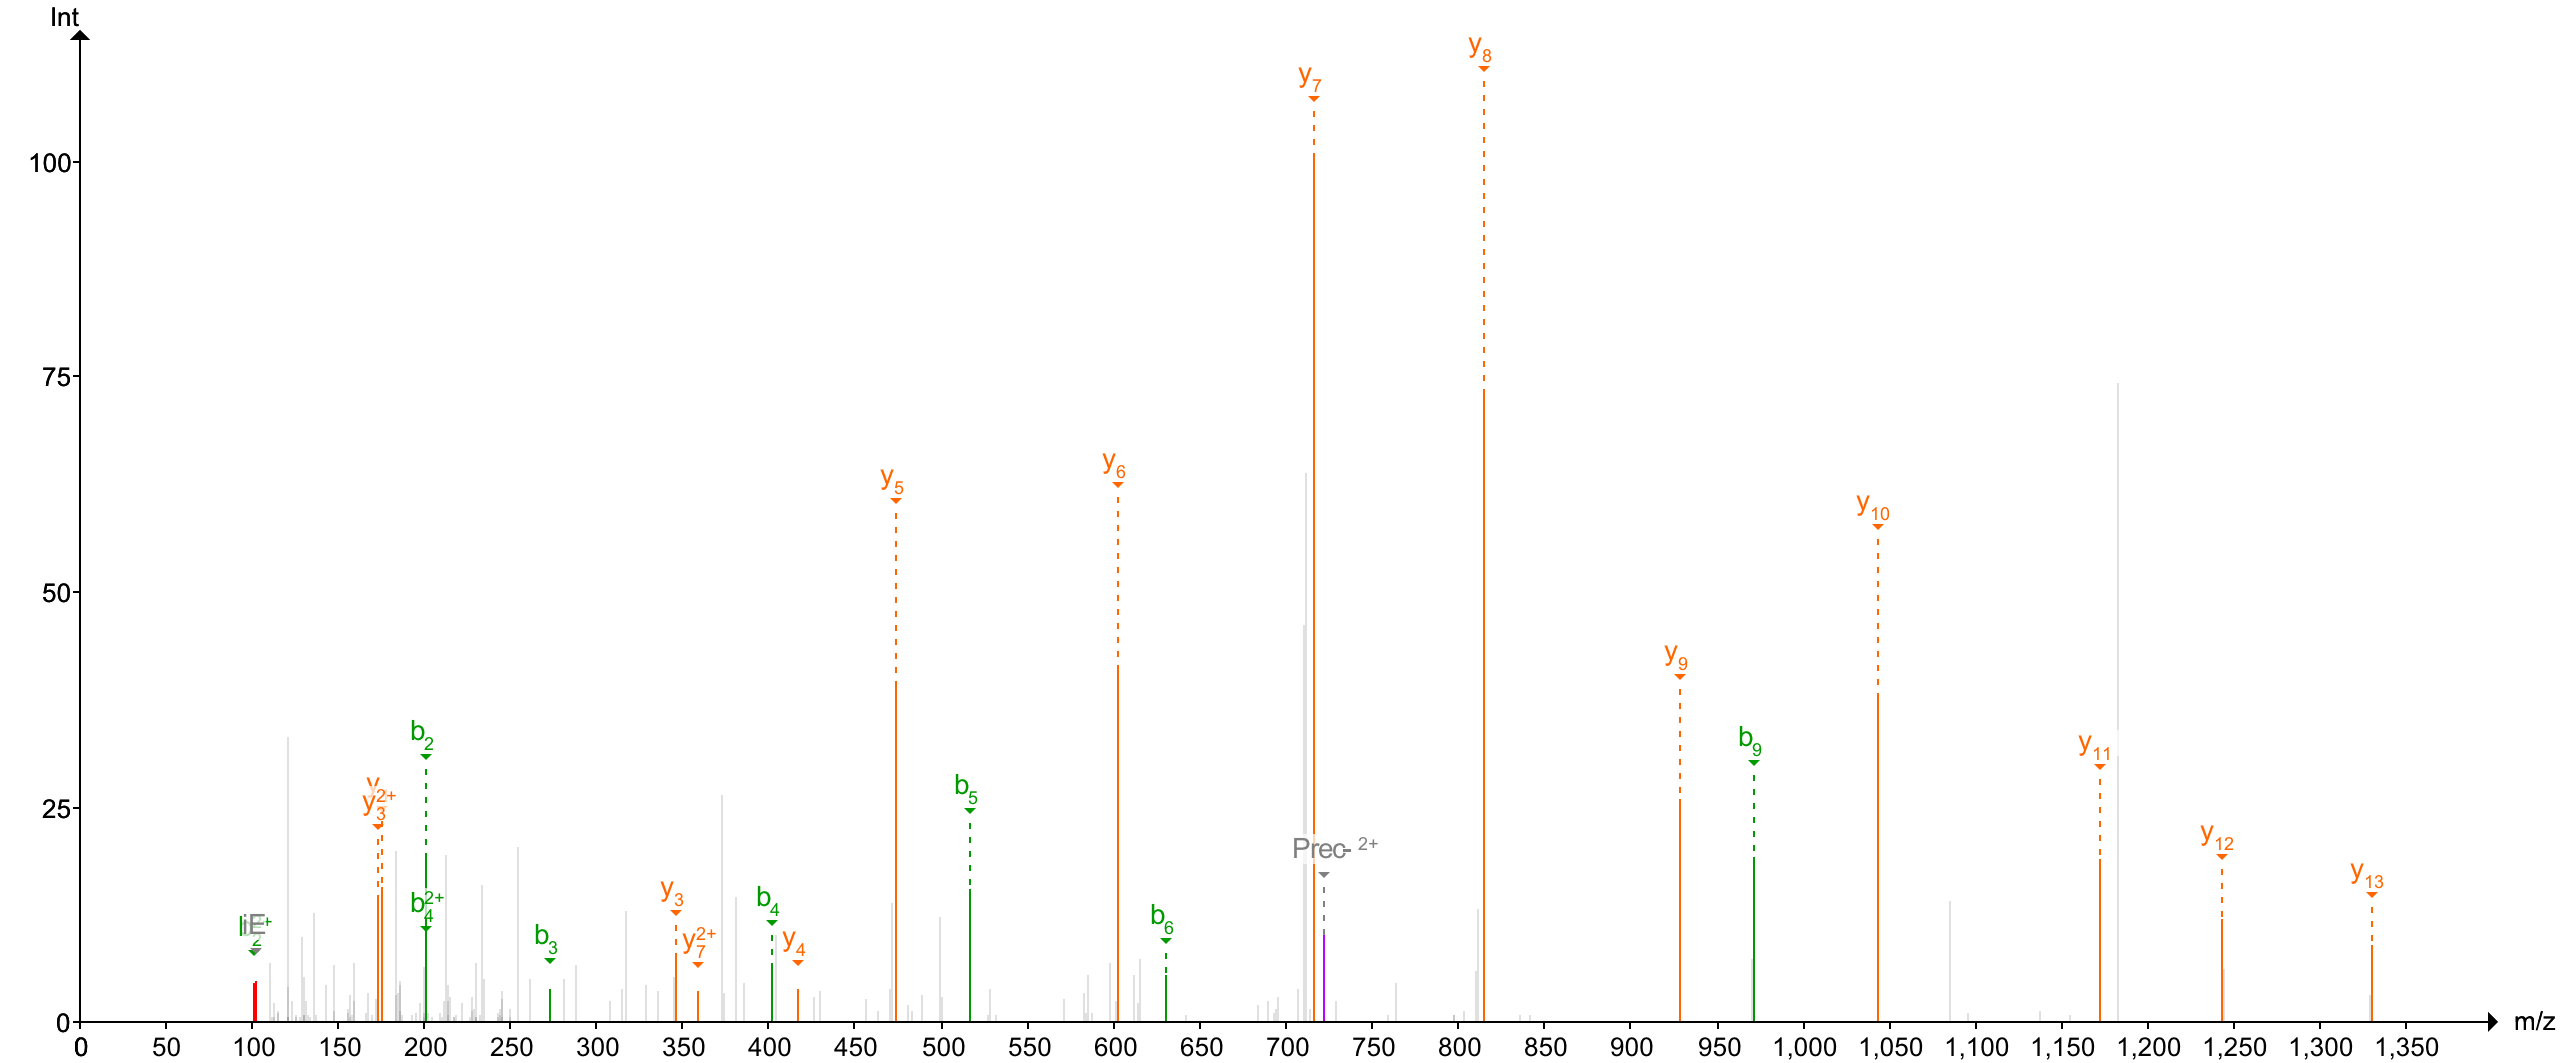

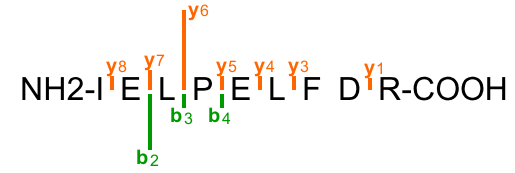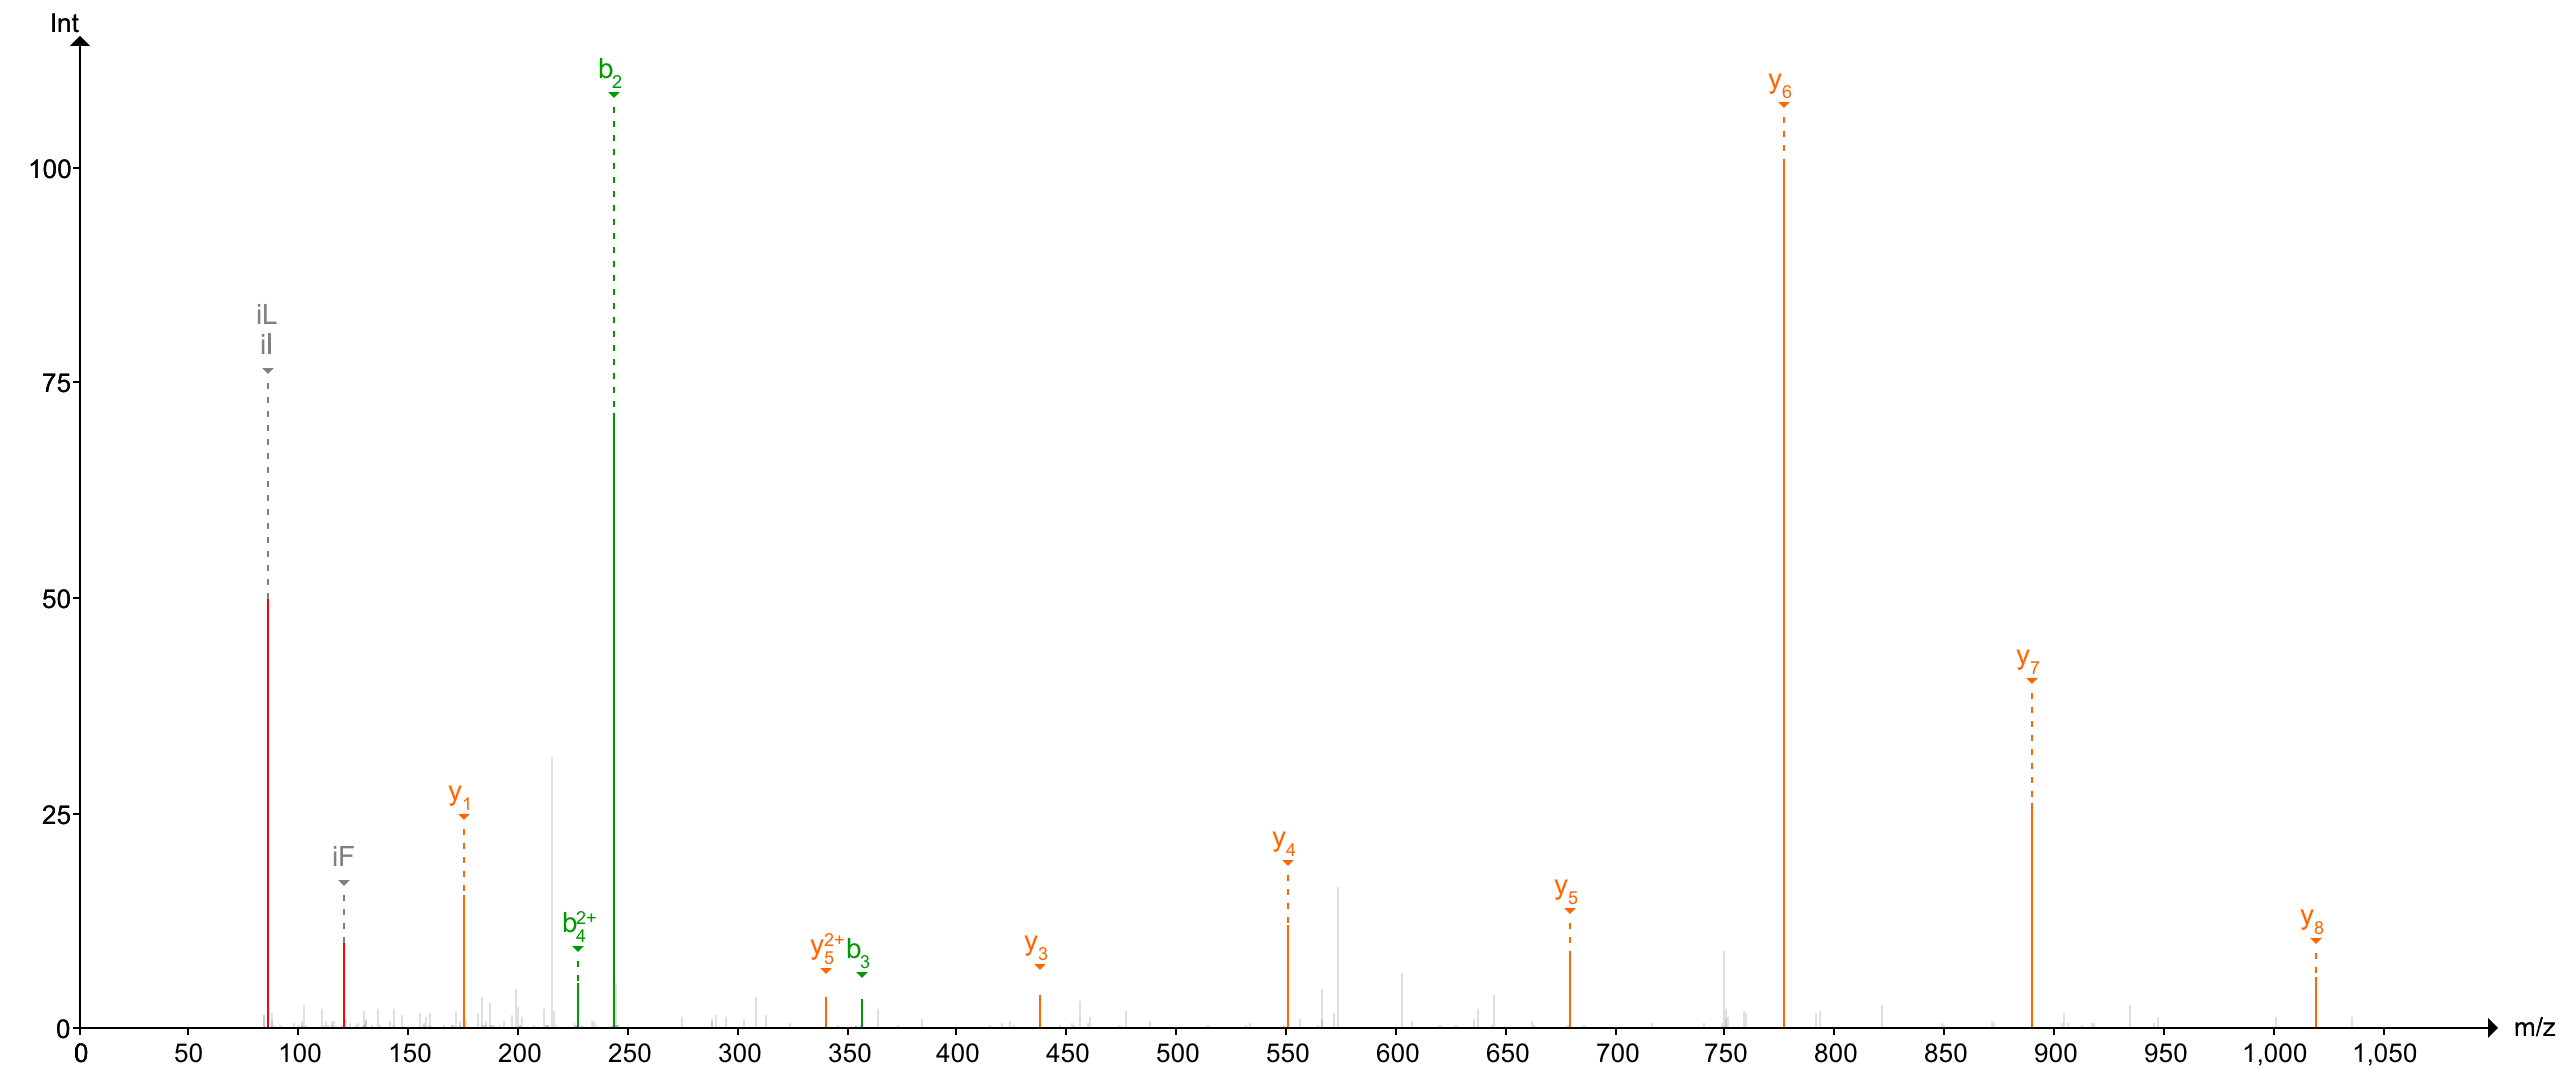

NH<sub>2</sub>-D A I I T I Q A I L F I L R-COOH  
 b<sub>2</sub> b<sub>3</sub> b<sub>4</sub> b<sub>6</sub> y<sub>1</sub> y<sub>2</sub> y<sub>3</sub> y<sub>4</sub> y<sub>5</sub> y<sub>6</sub> y<sub>7</sub>

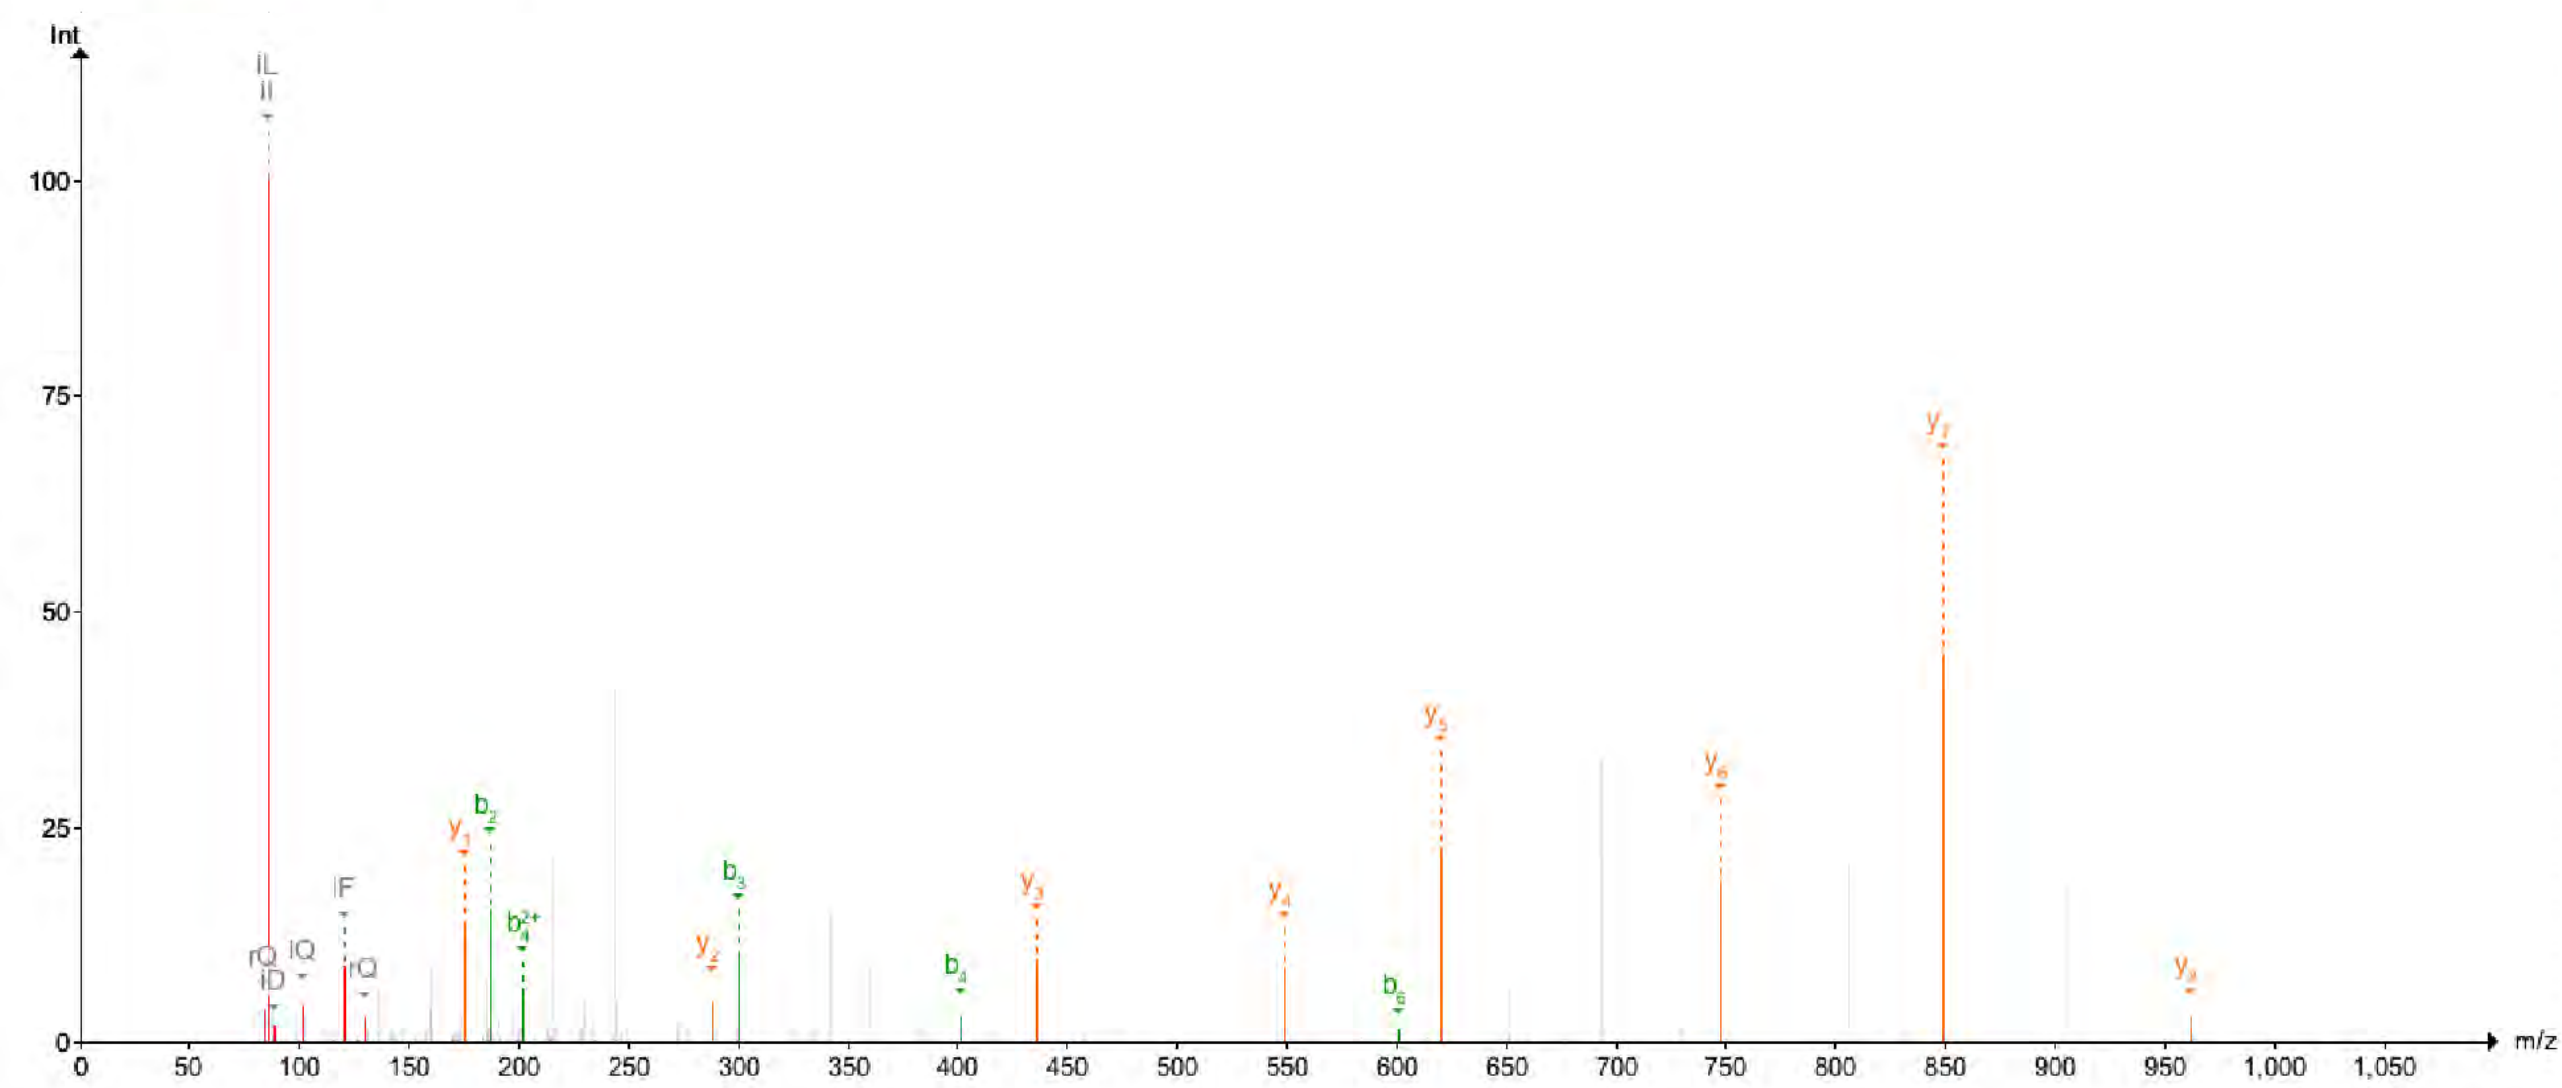

NH<sub>2</sub>-I<sup>y<sub>8</sub></sup>L<sup>y<sub>7</sub></sup>I<sup>y<sub>6</sub></sup>A<sup>y<sub>5</sub></sup>F<sup>y<sub>4</sub></sup>I<sup>y<sub>3</sub></sup>S<sup>y<sub>2</sub></sup>Y<sup>y<sub>1</sub></sup>K-COOH

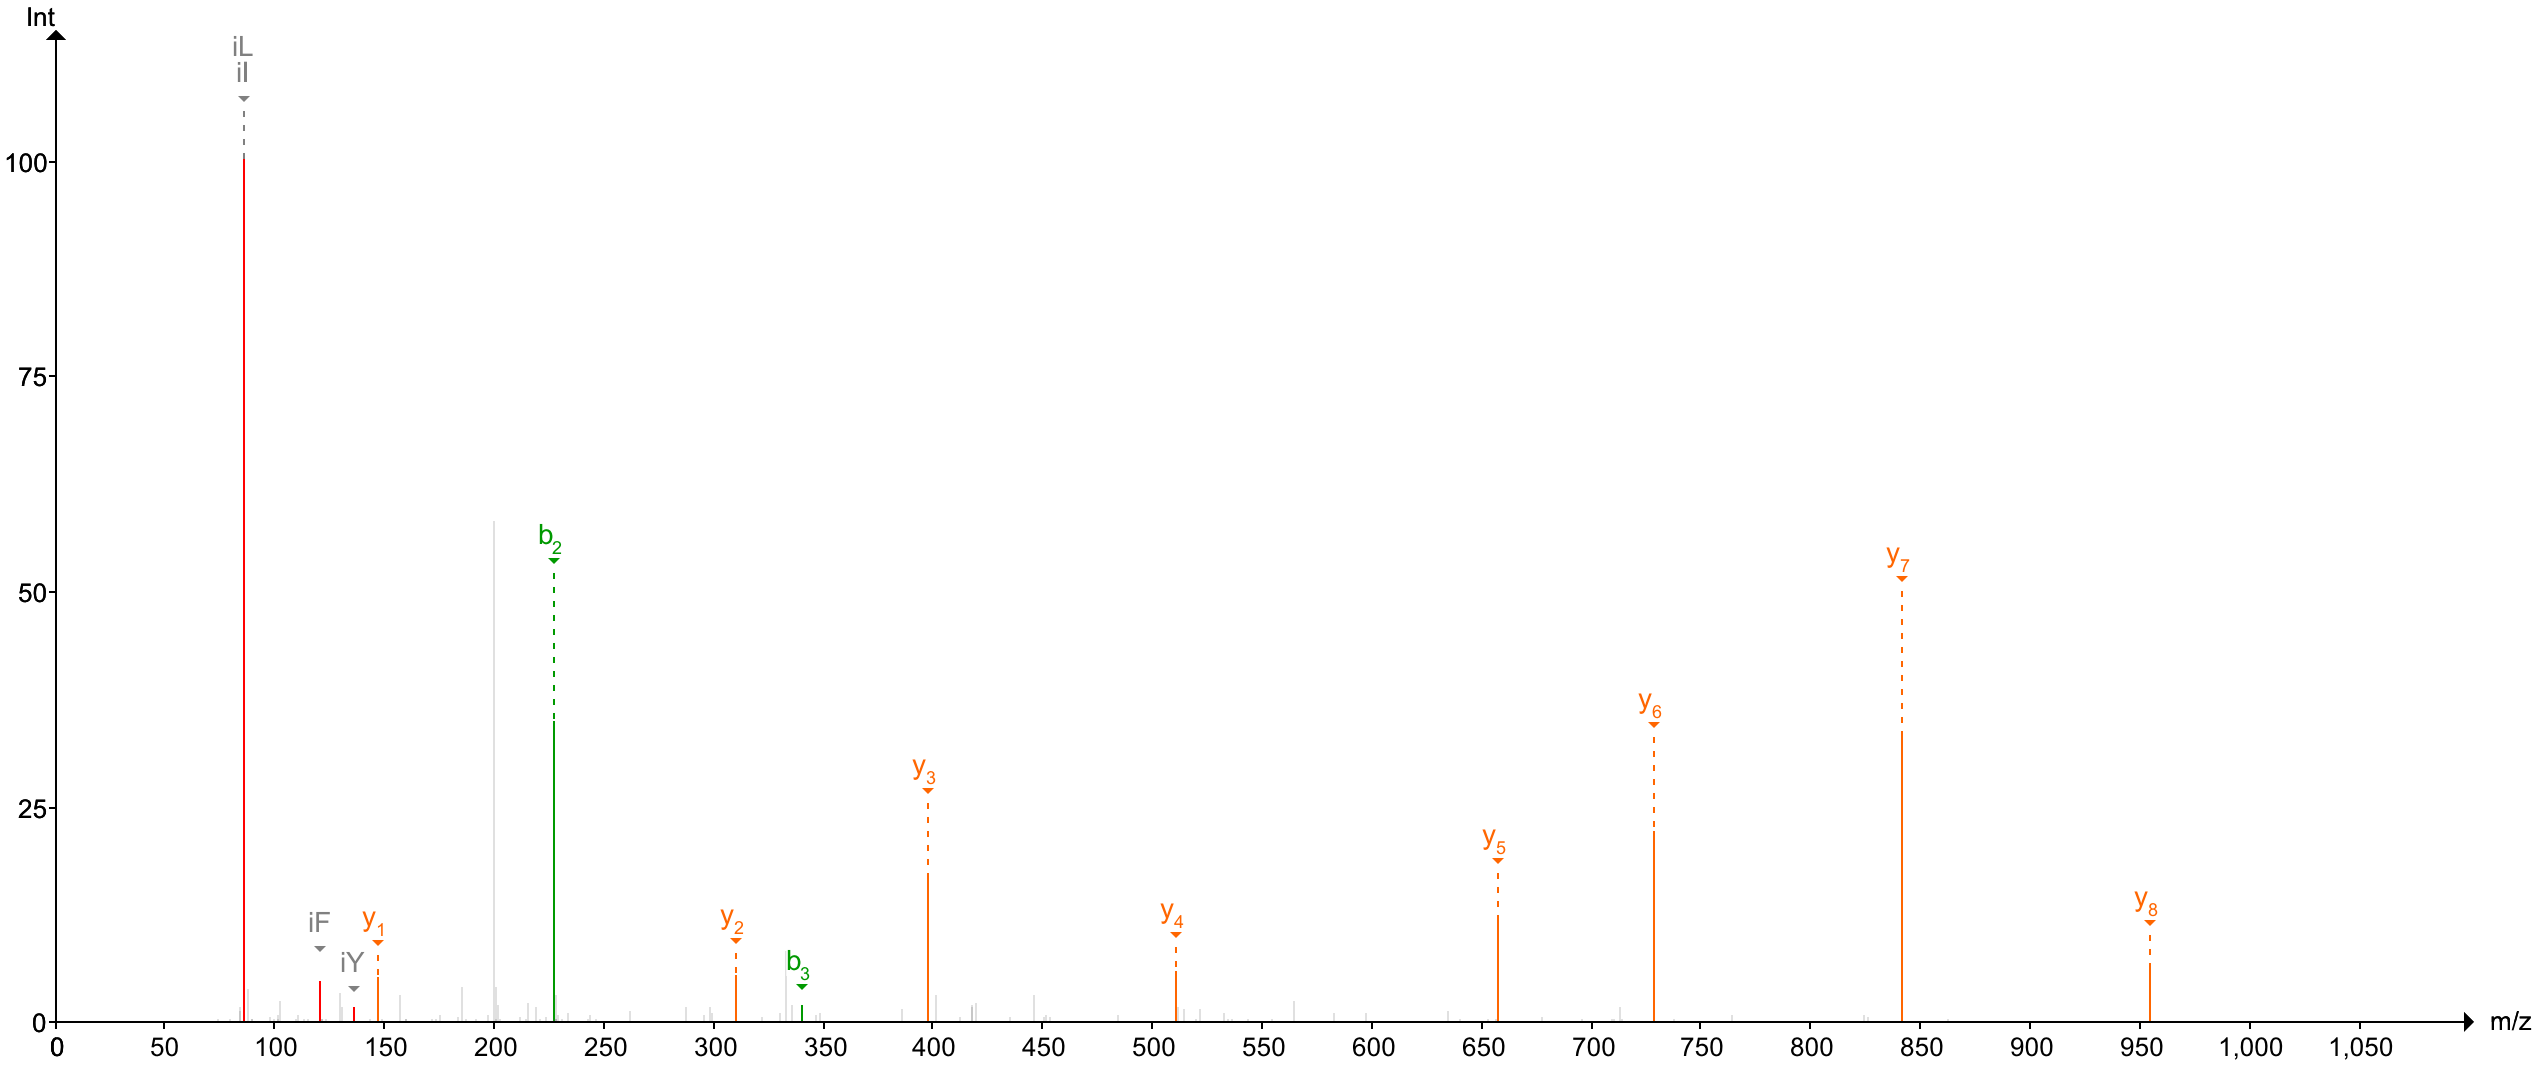

NH<sub>2</sub>-S I L D A D P E A Q A L L E I S G H S R-COOH

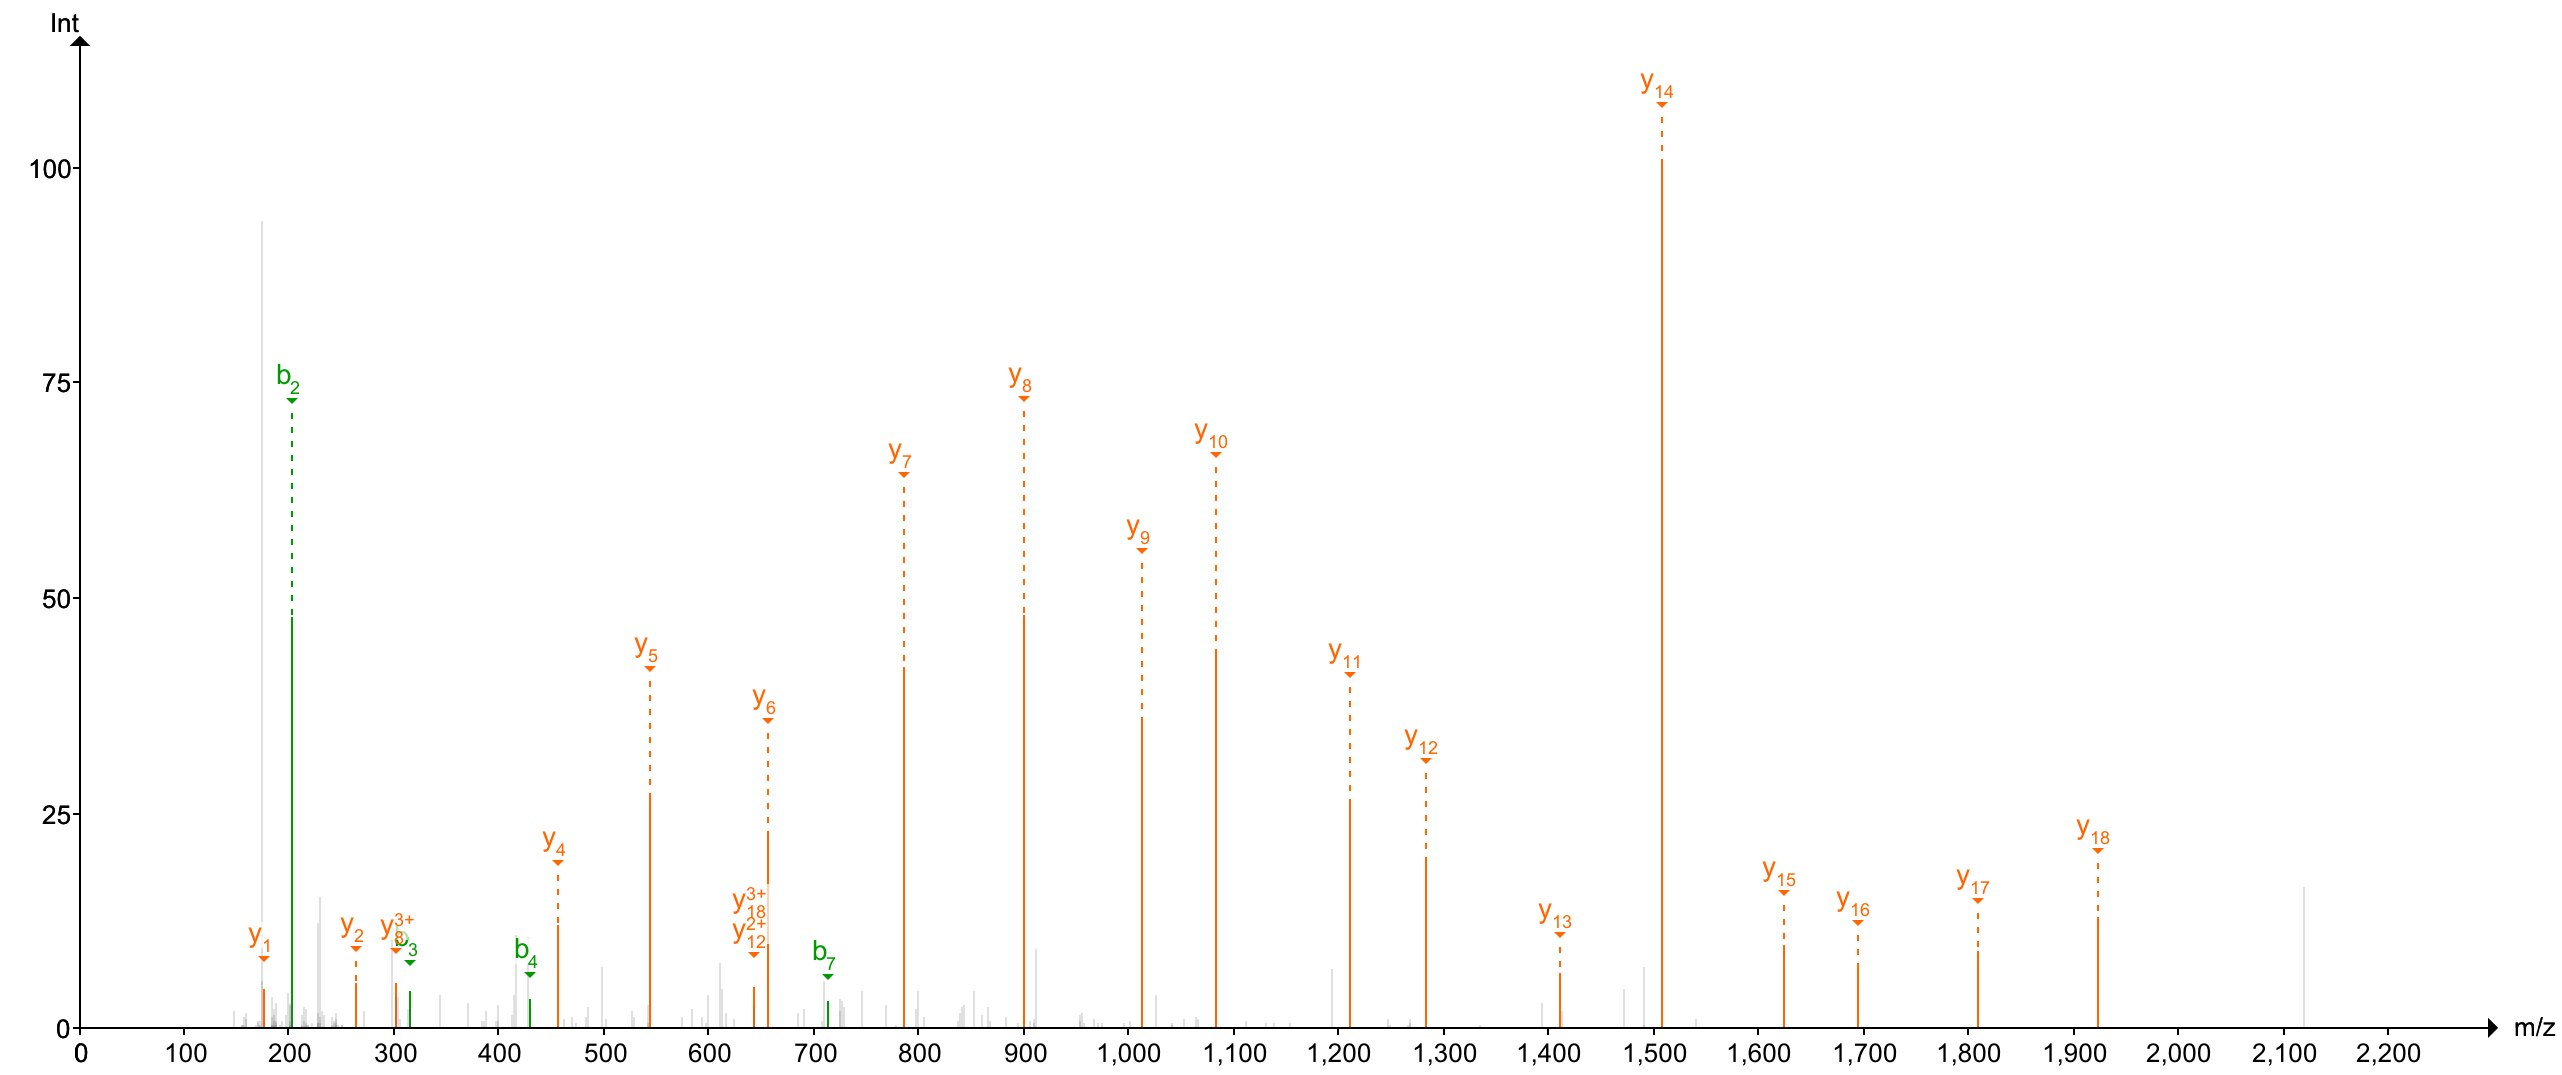

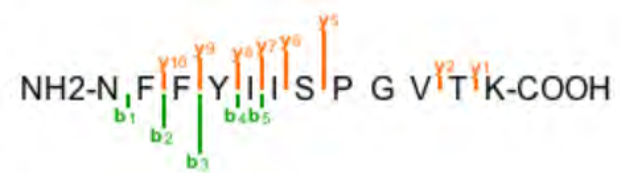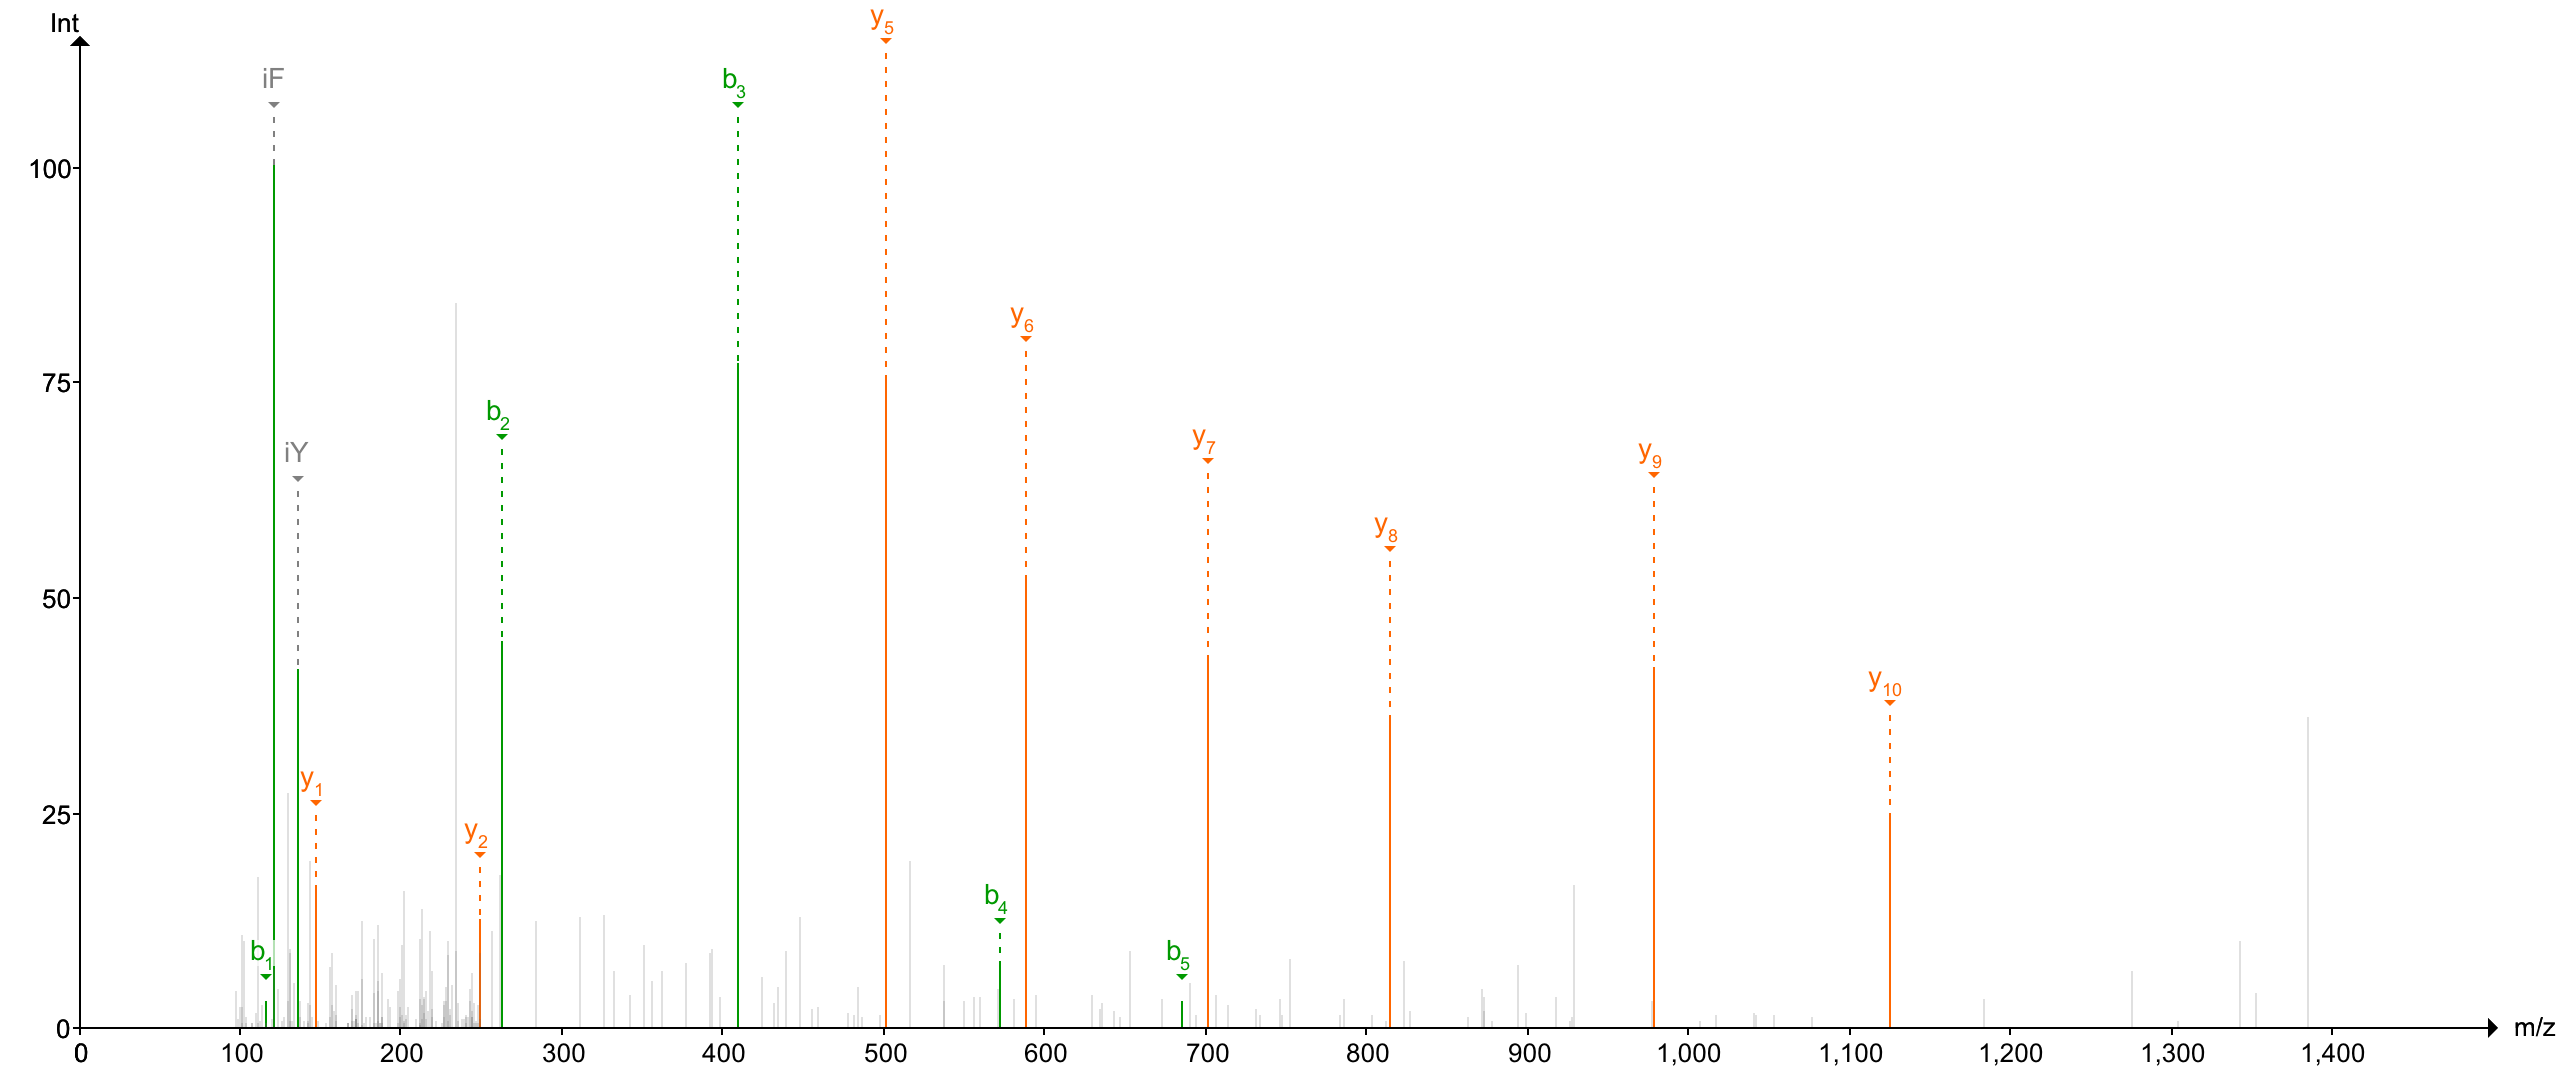

NH<sub>2</sub>-L F T W N I L K-COOH

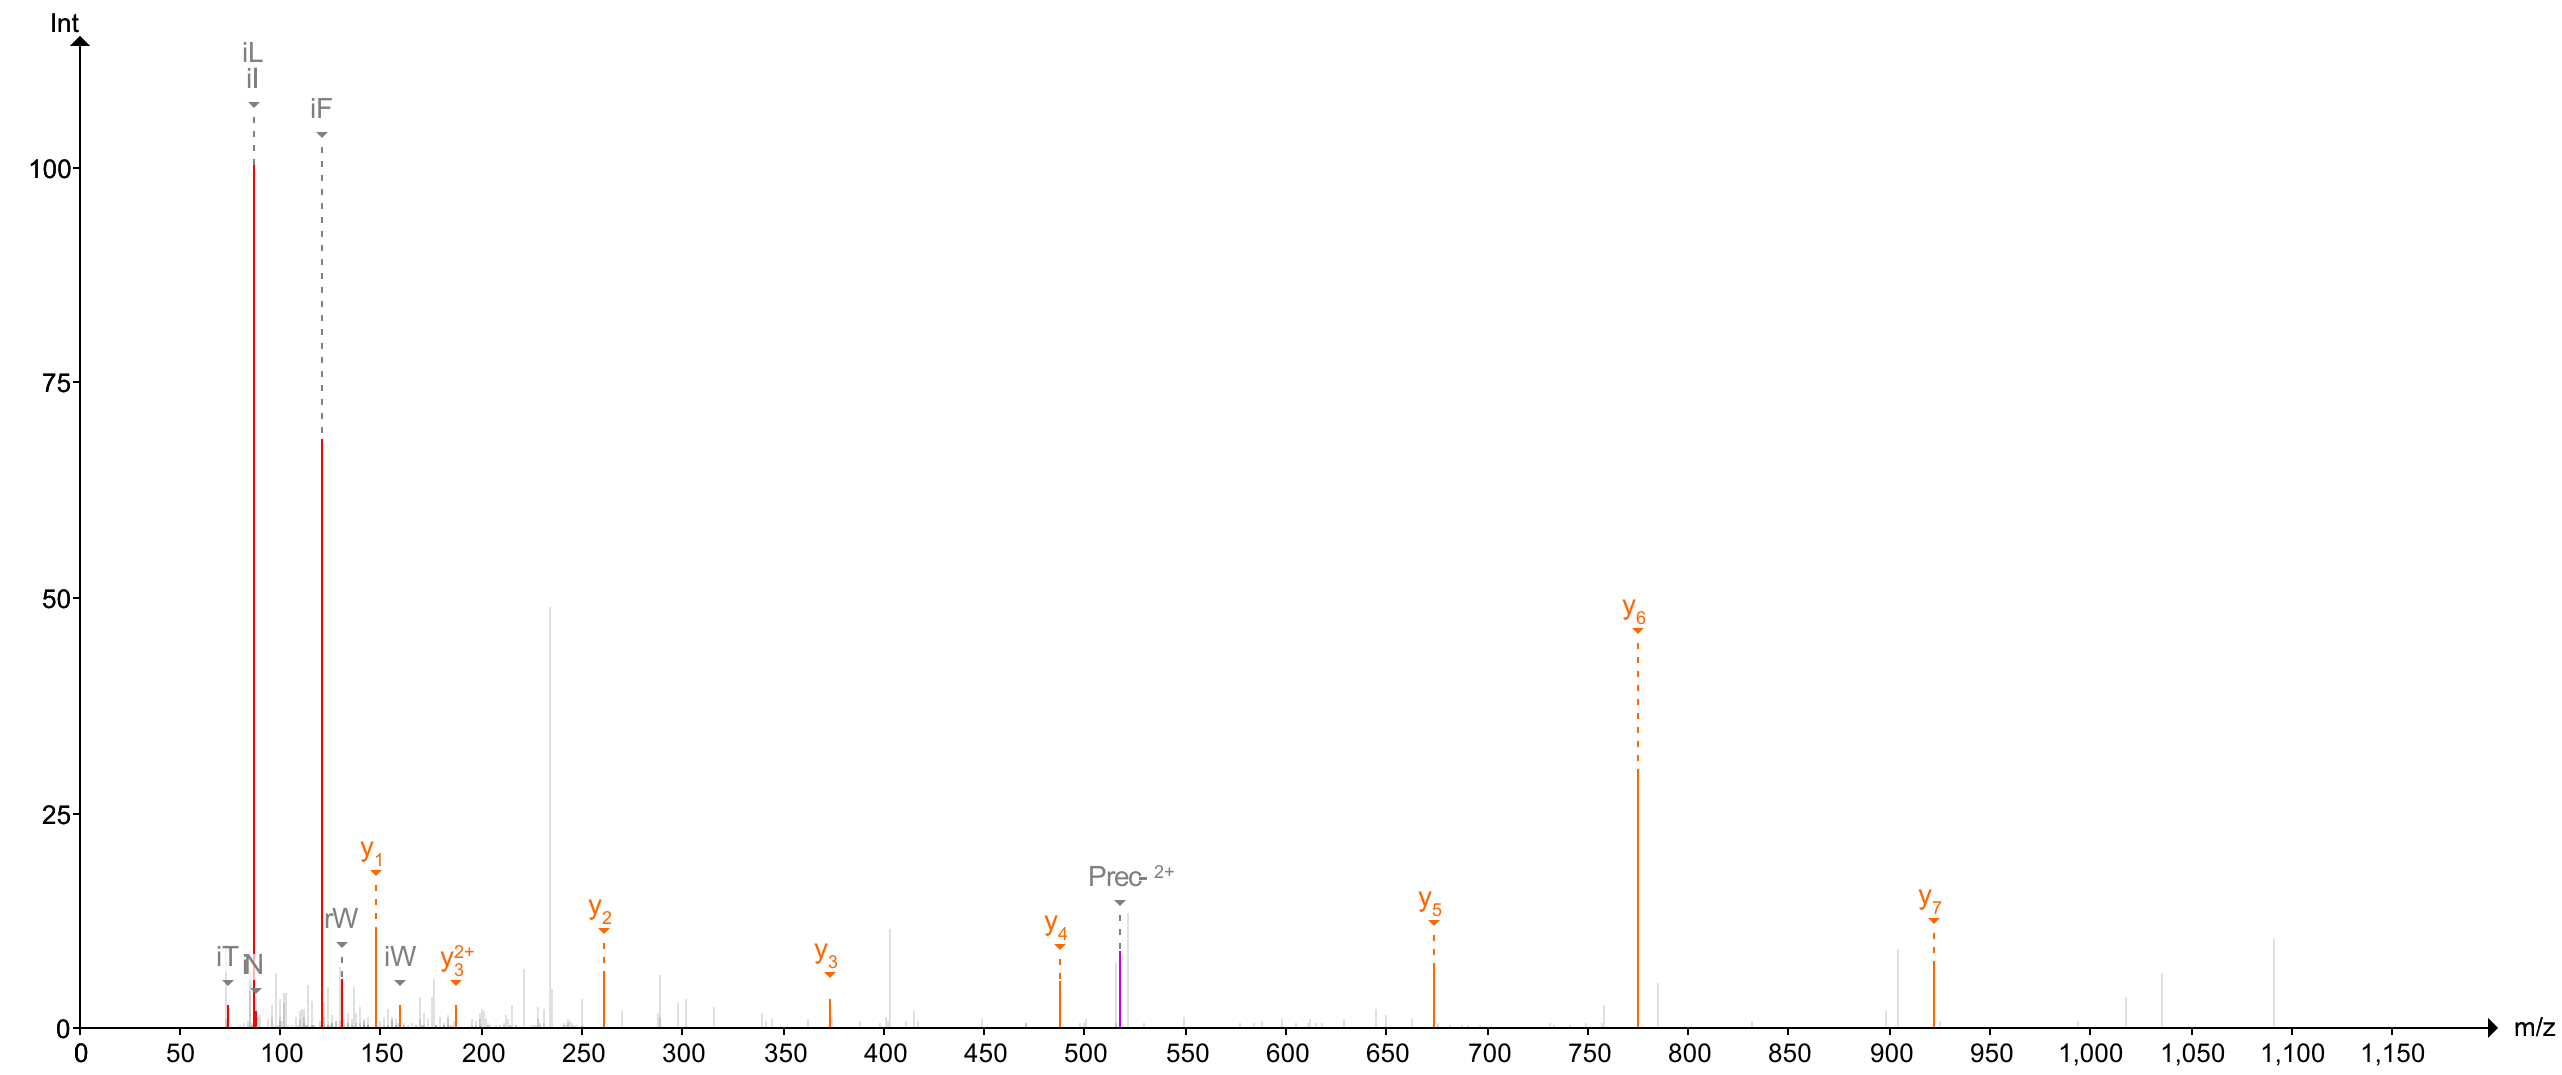

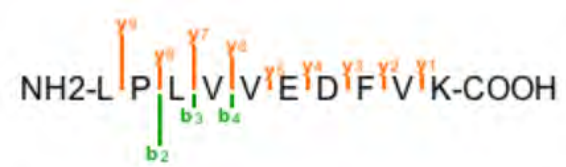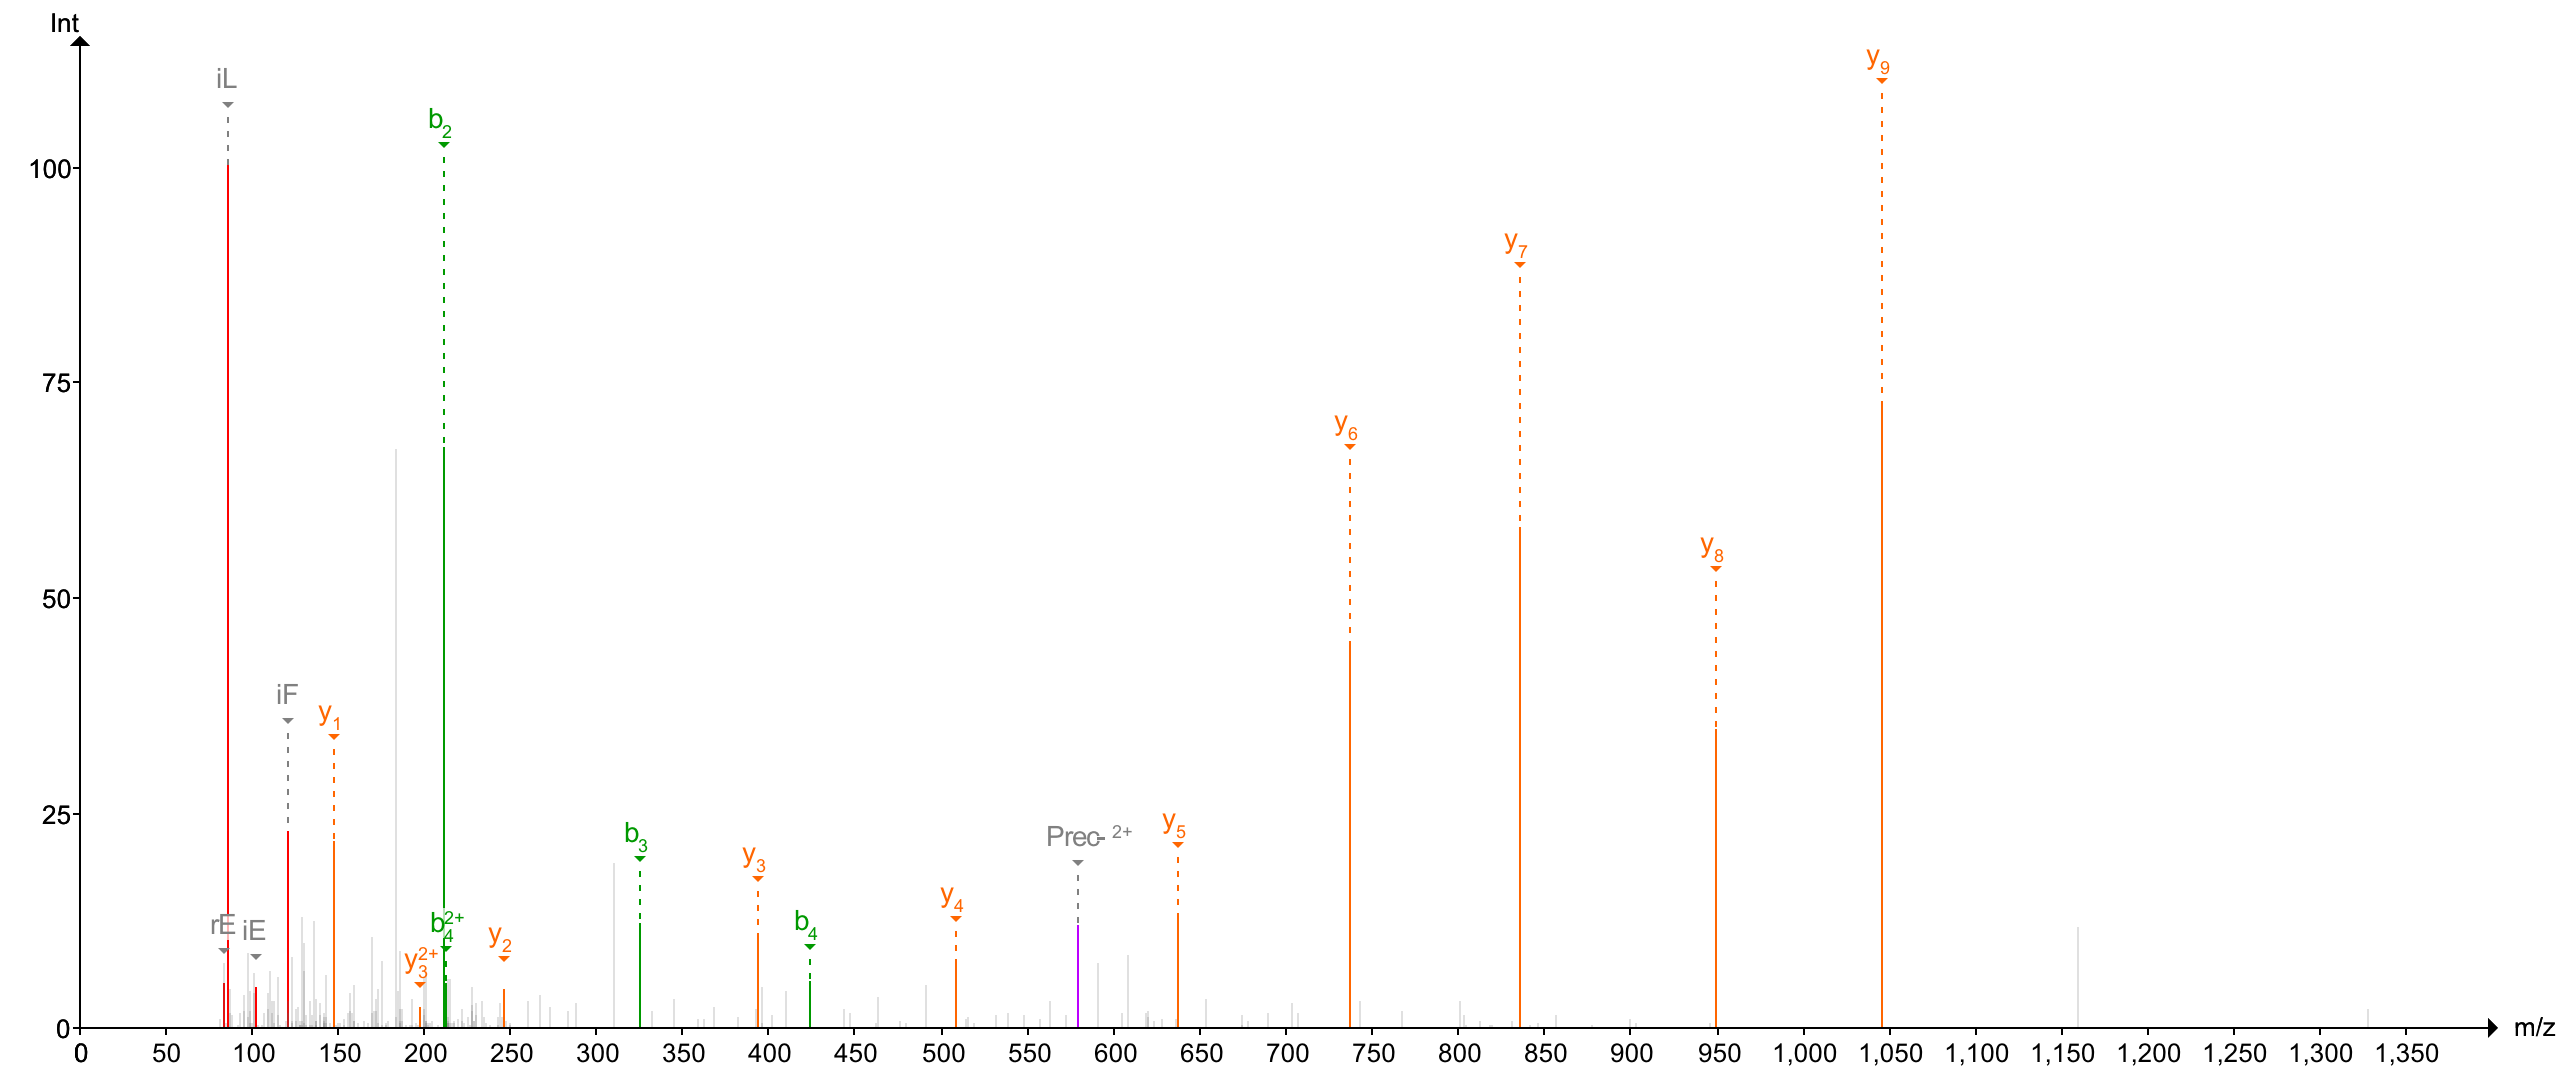



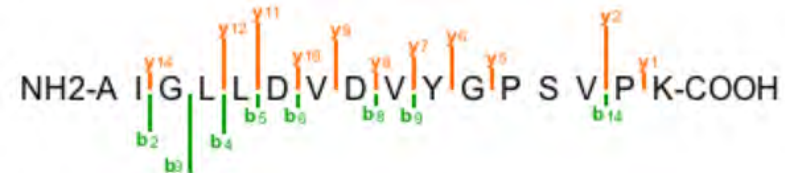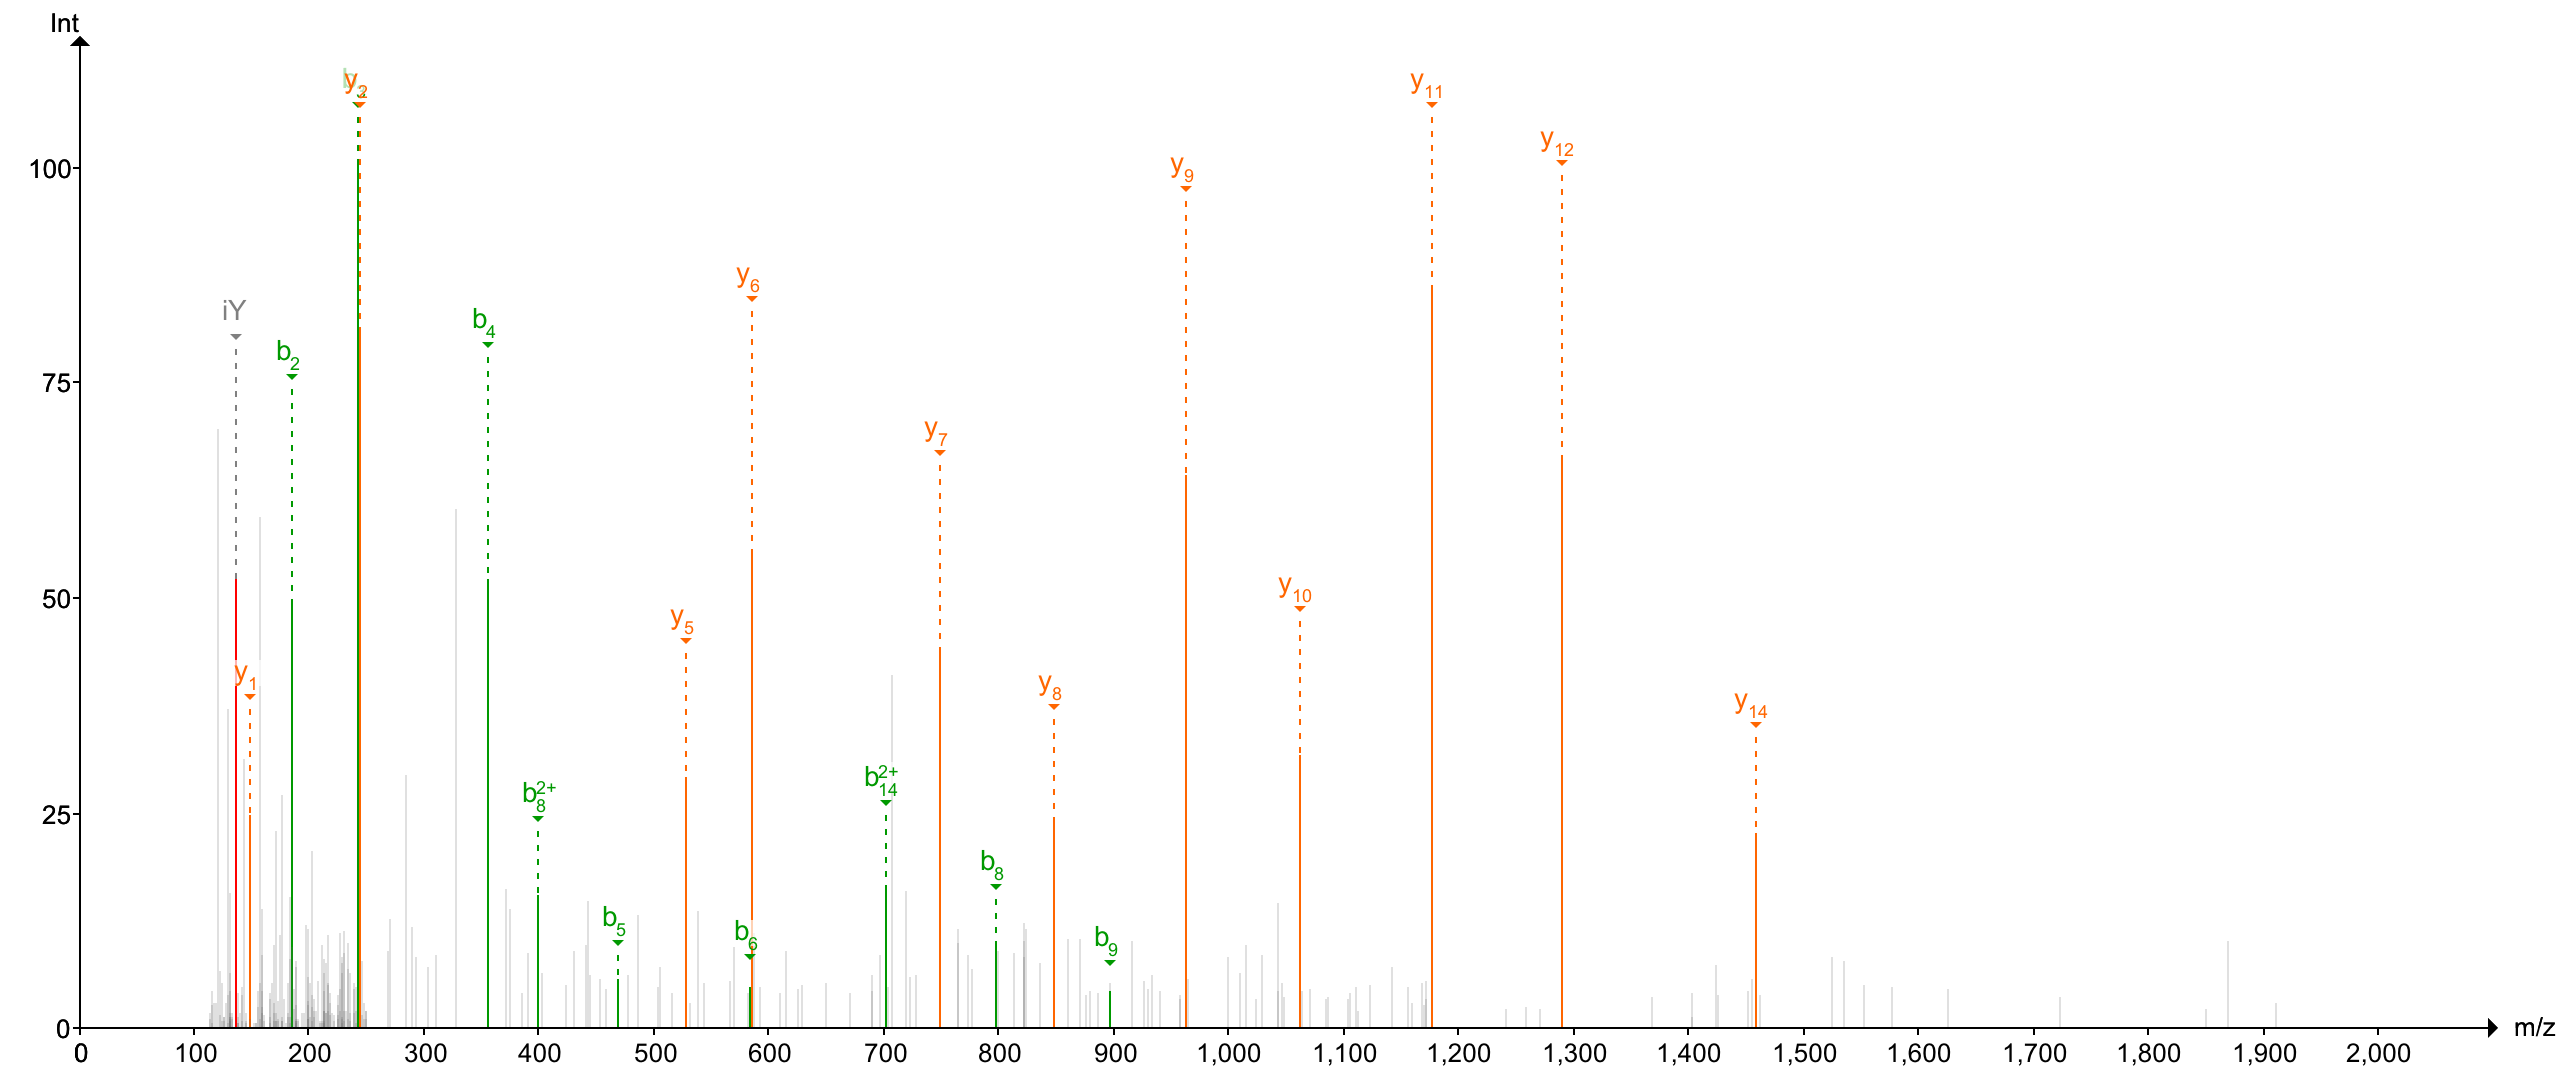

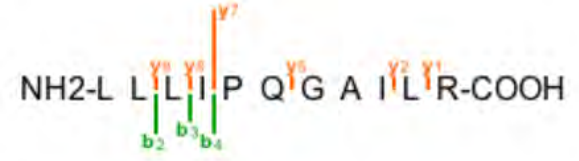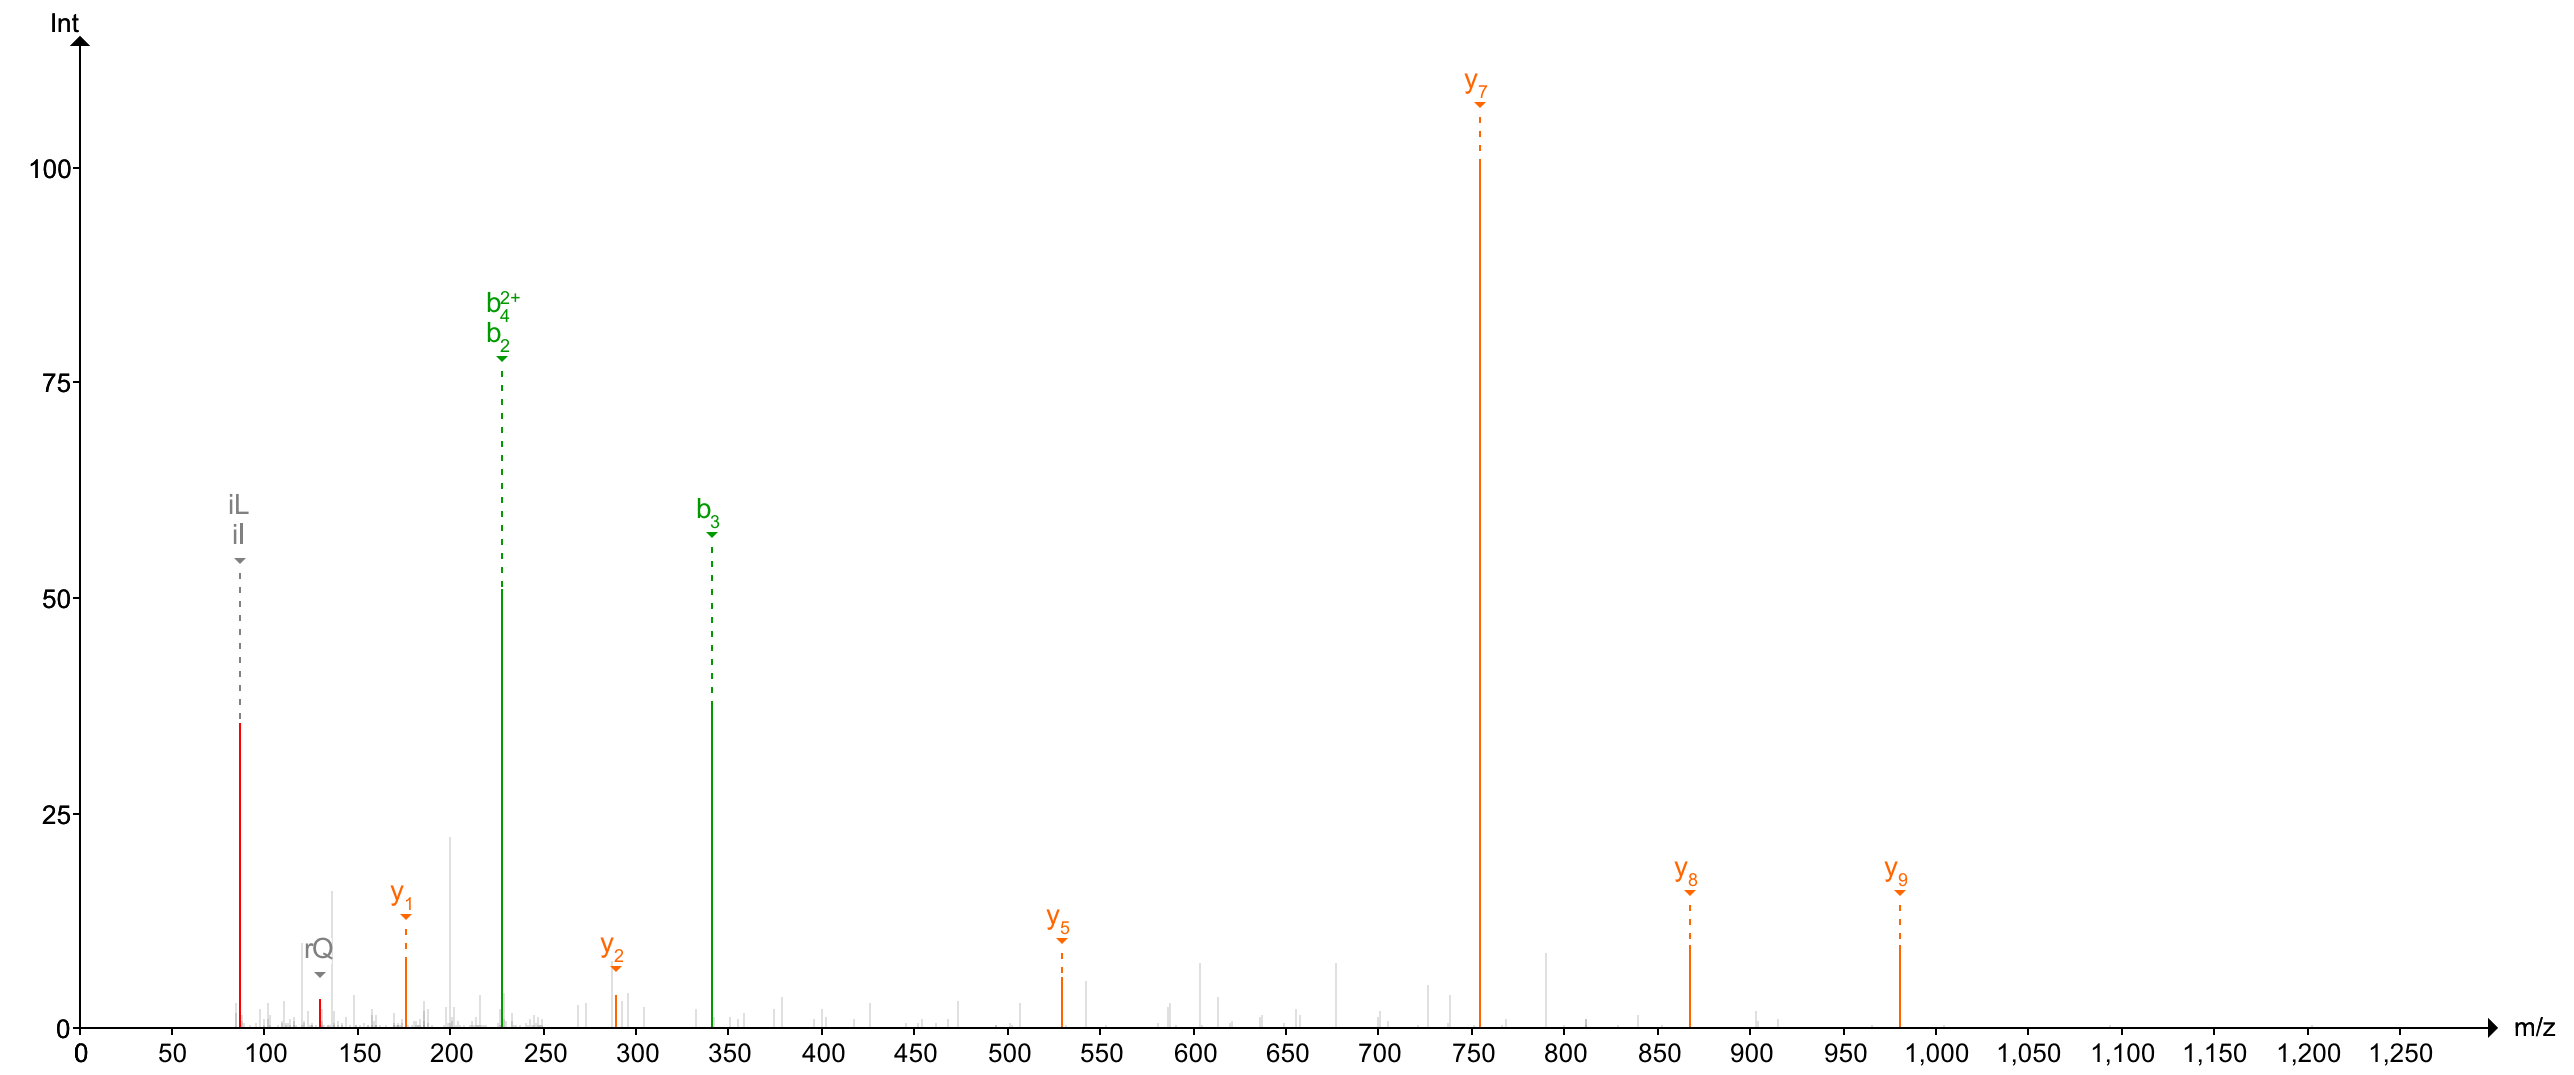

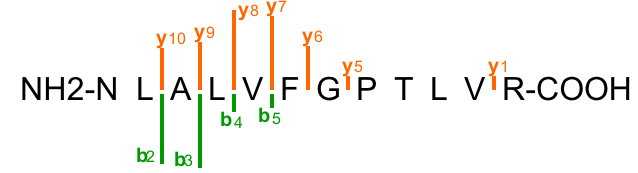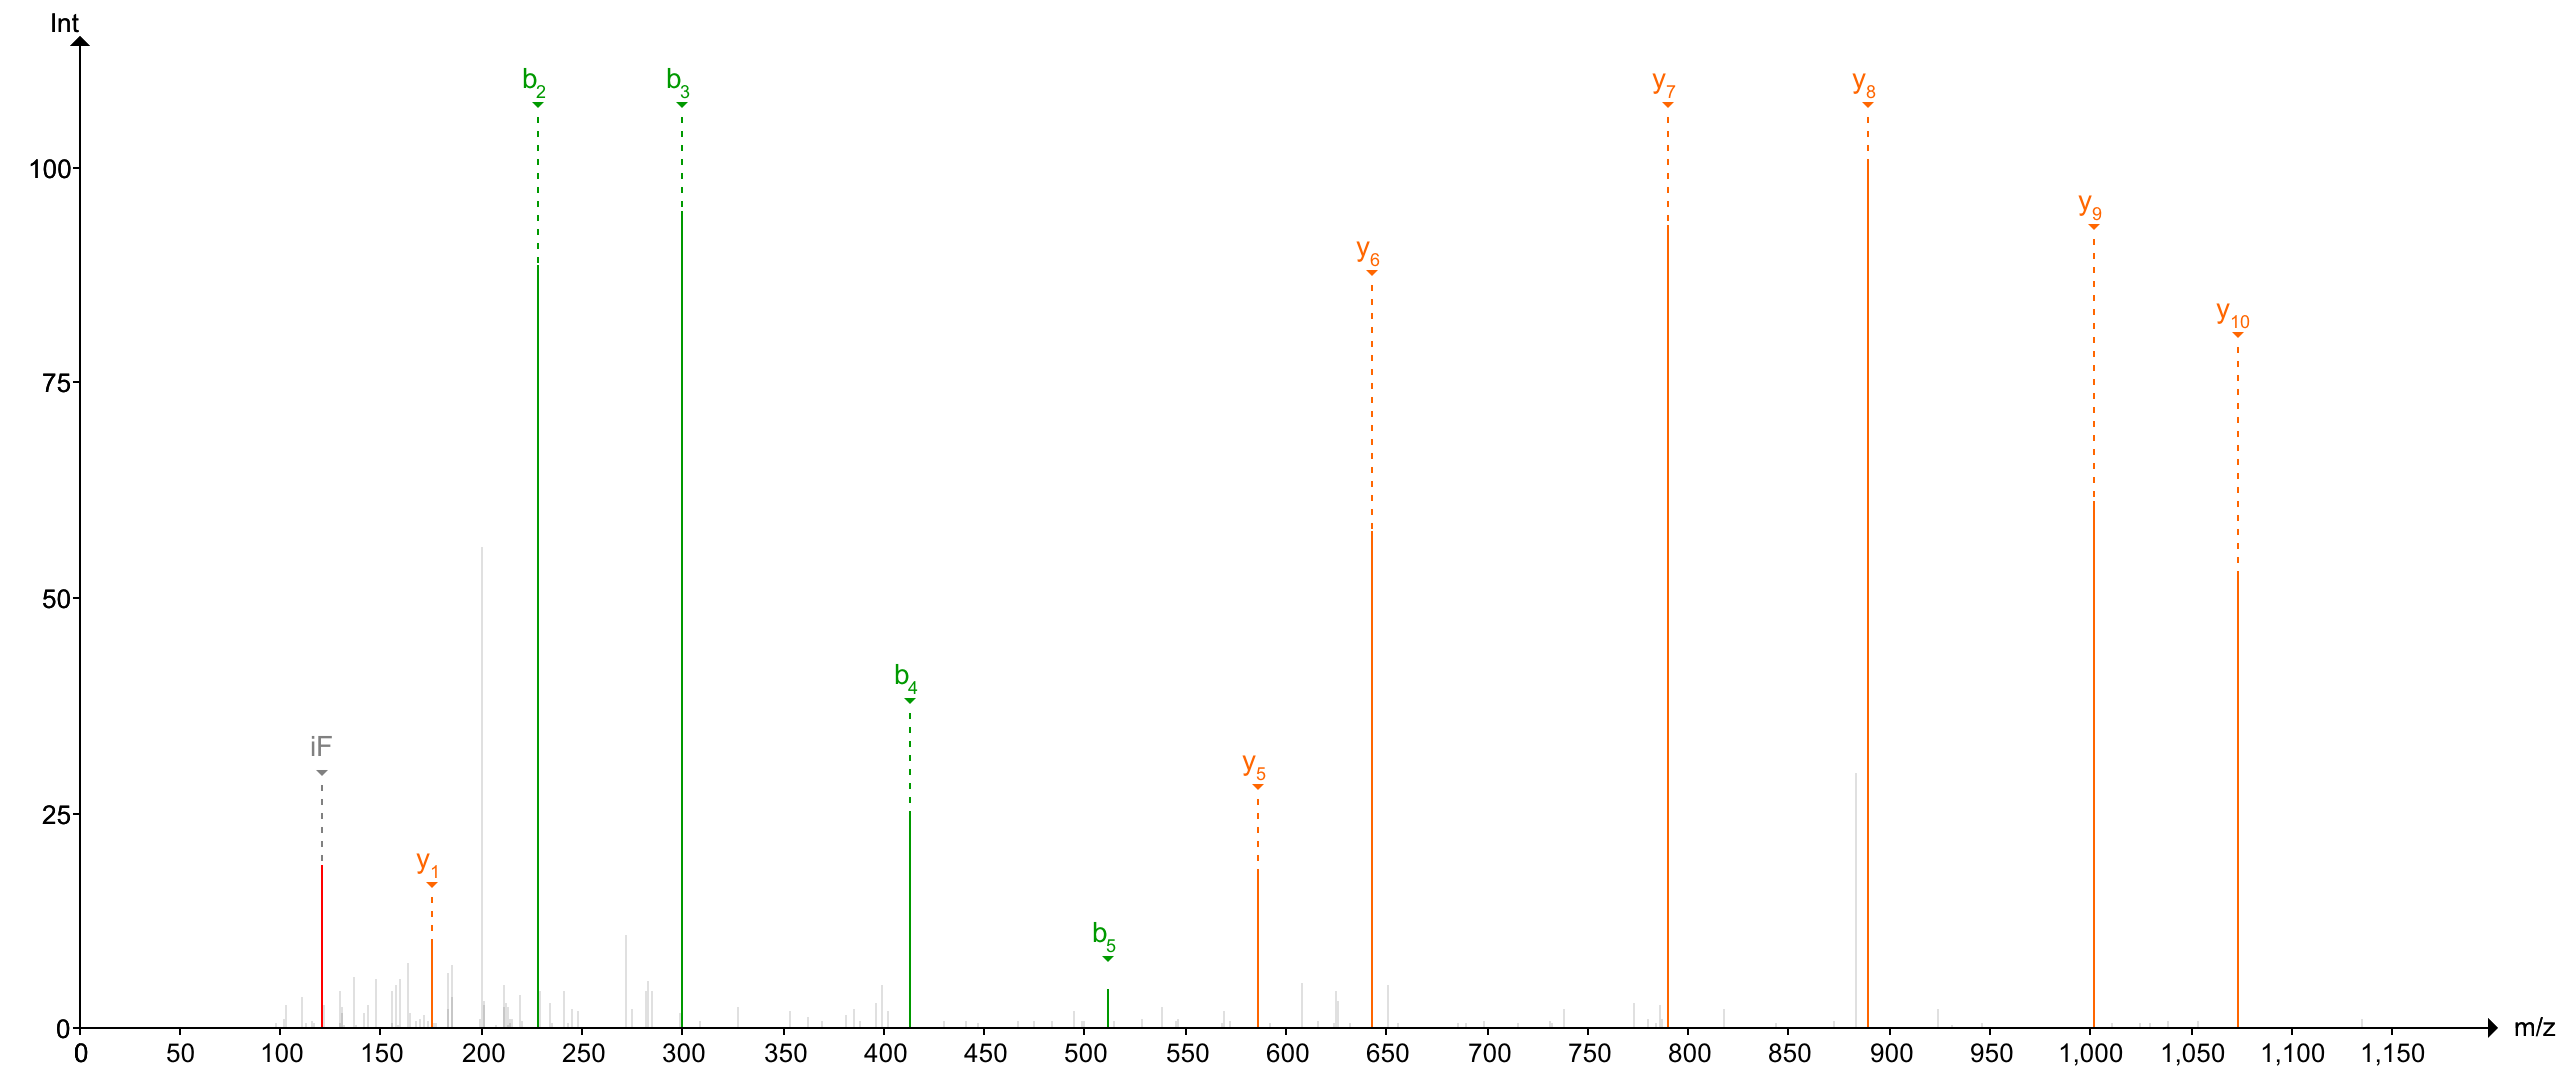

NH<sub>2</sub>-V D<sub>1</sub> V<sub>1</sub> I<sub>1</sub> P<sub>1</sub> V<sub>1</sub> T<sub>1</sub> A<sub>1</sub> I<sub>1</sub> N<sub>1</sub> L<sub>1</sub> Y<sub>1</sub> P<sub>1</sub> D<sub>1</sub> G<sub>1</sub> P<sub>1</sub> E<sub>1</sub> K-COOH

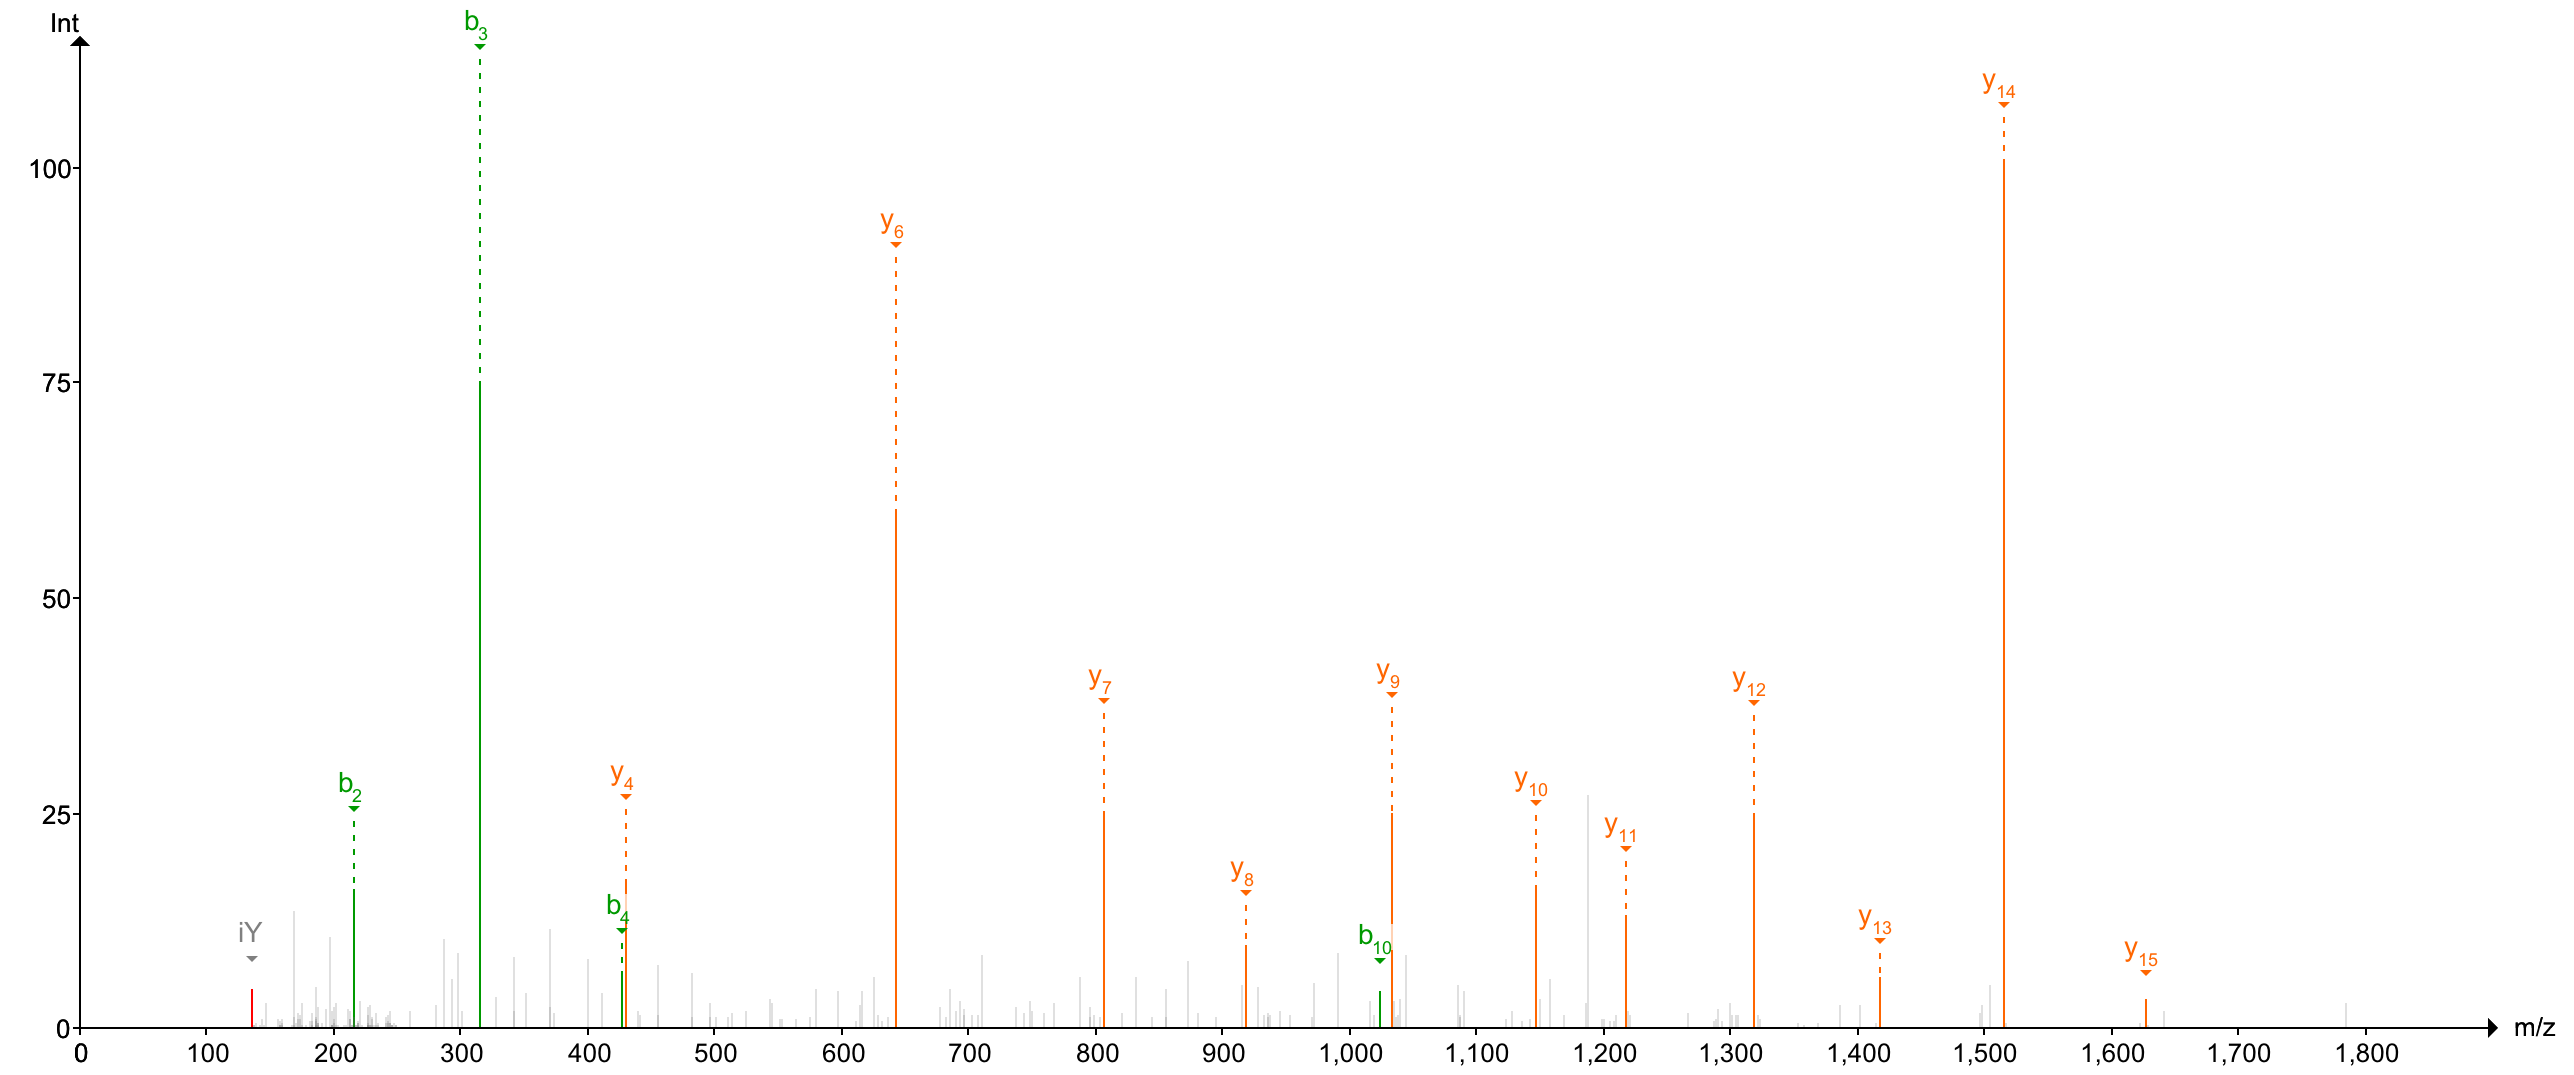

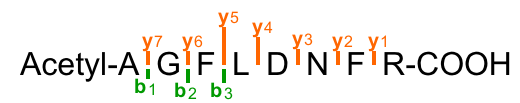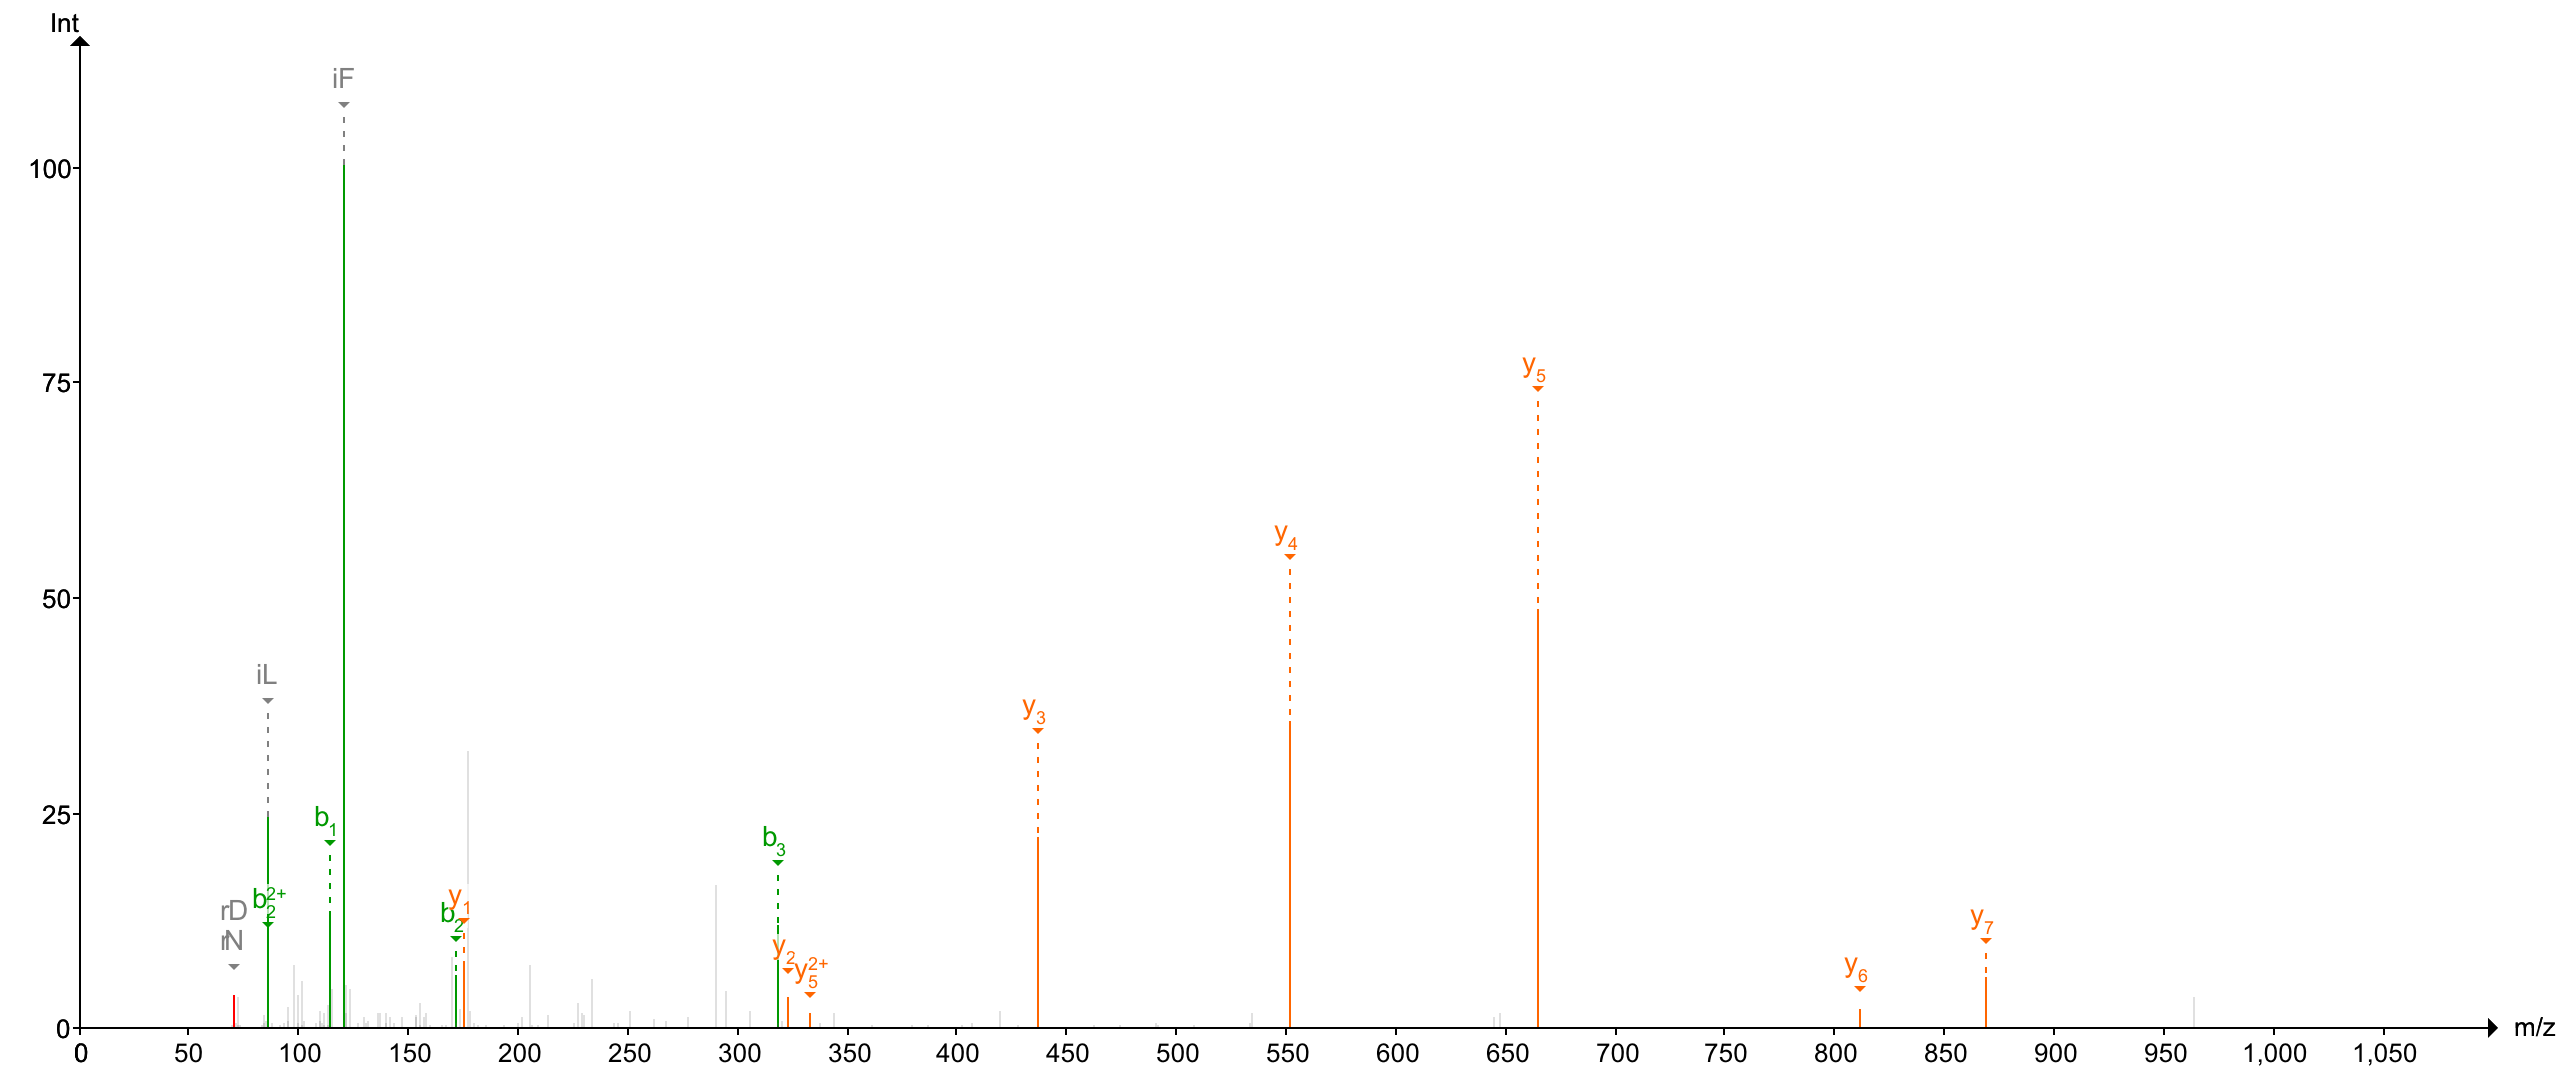

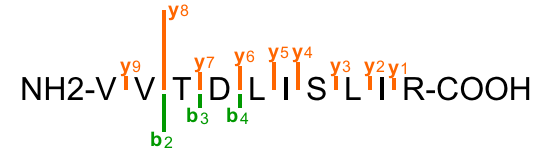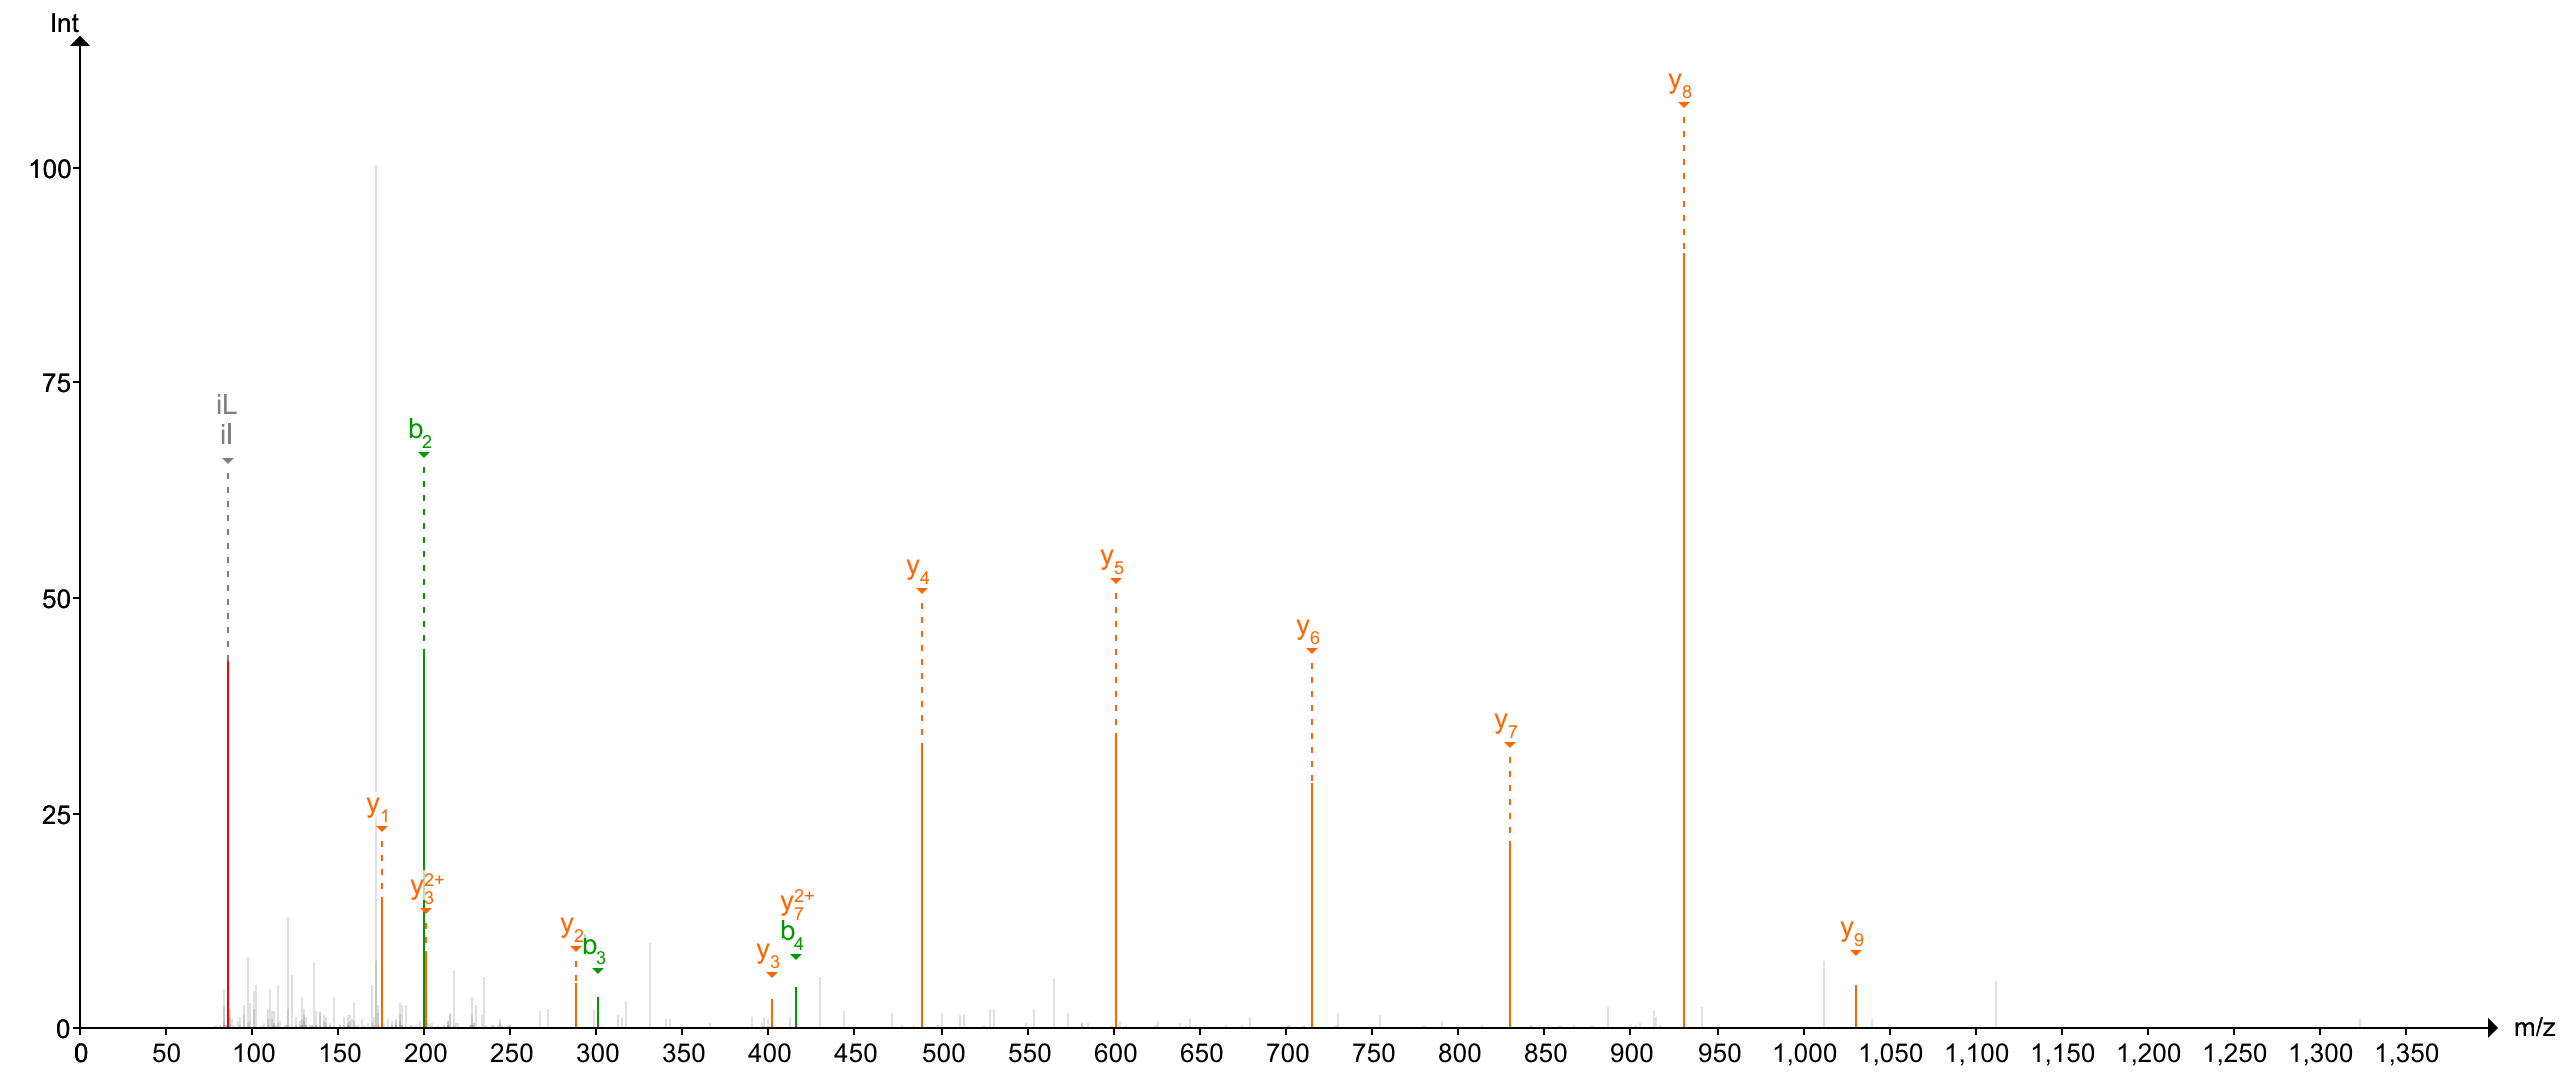

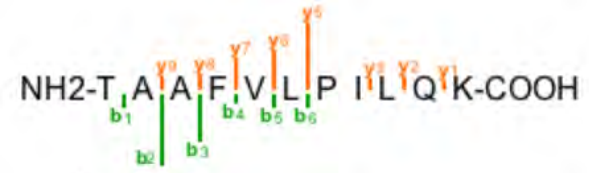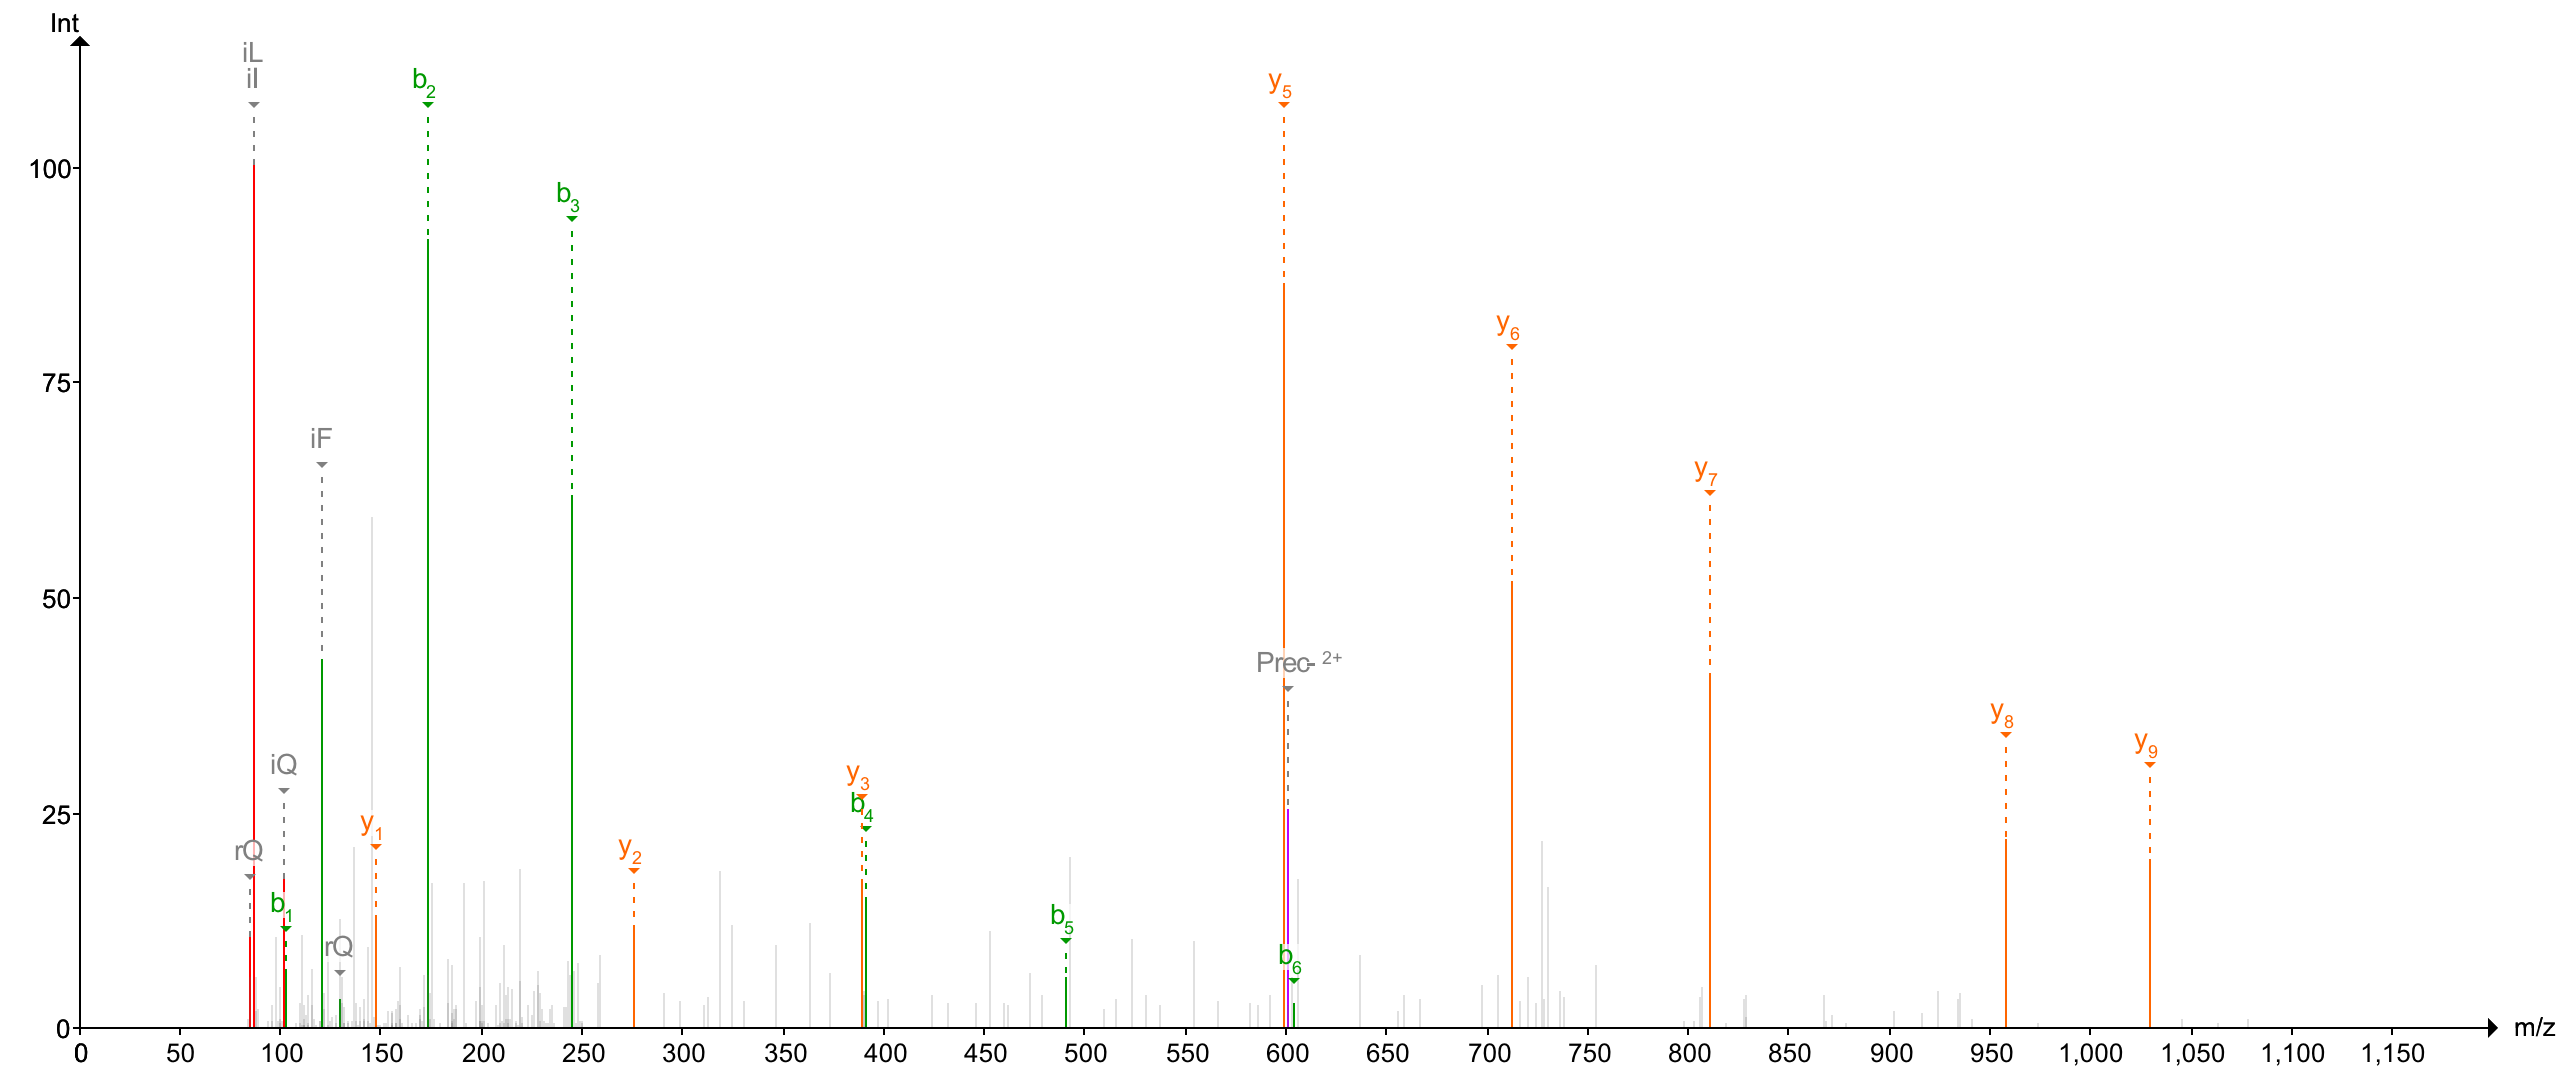

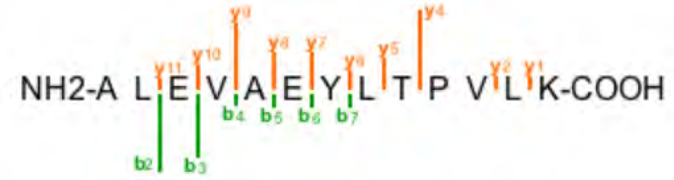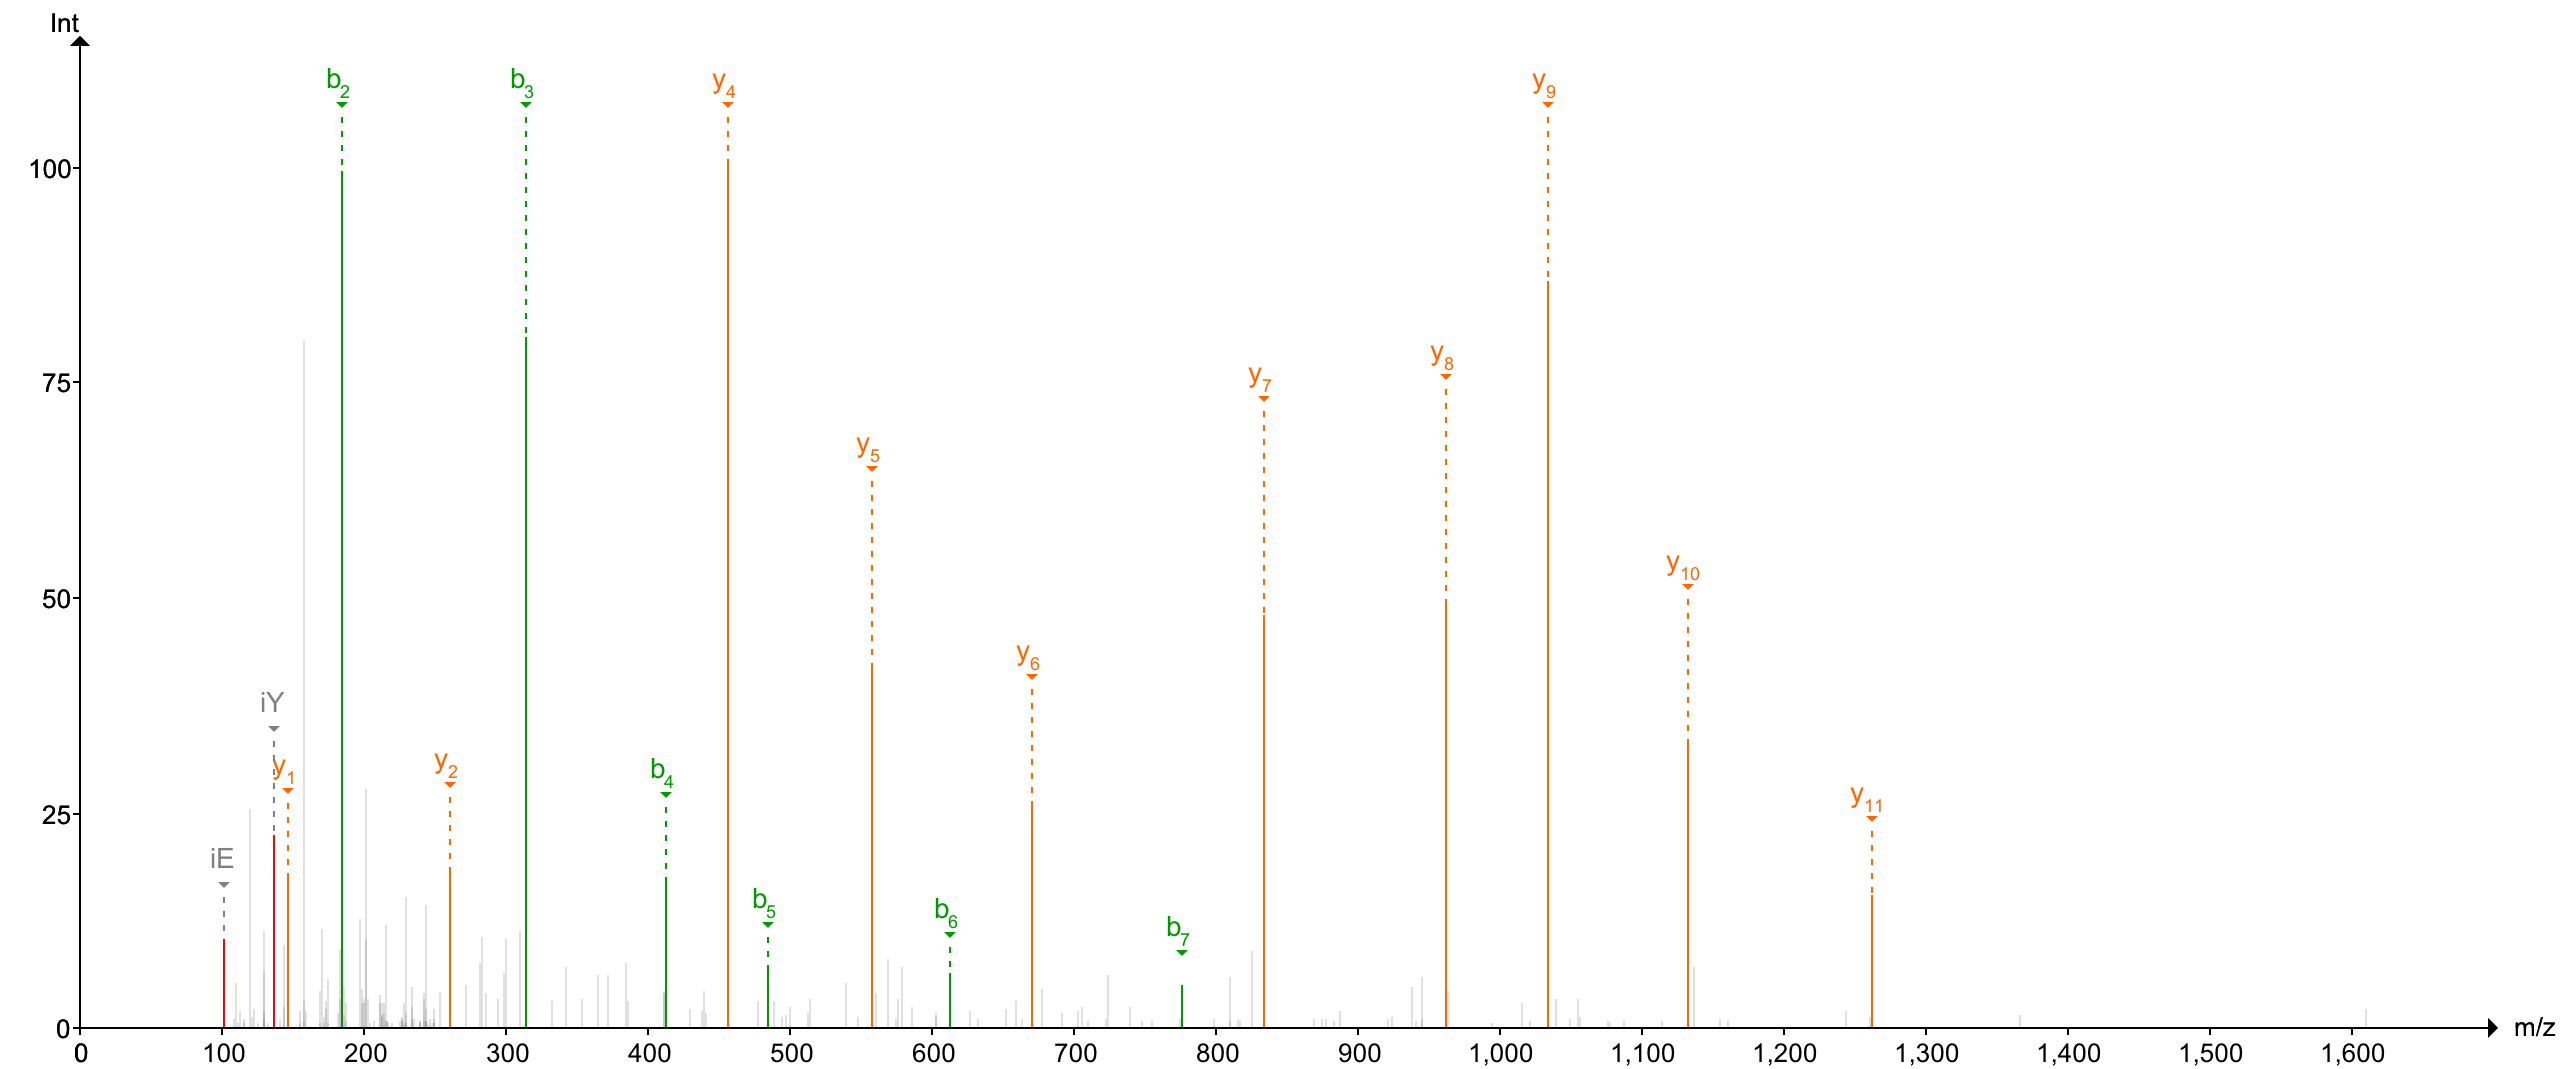



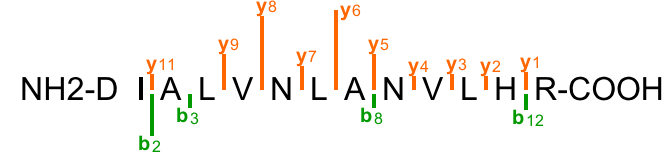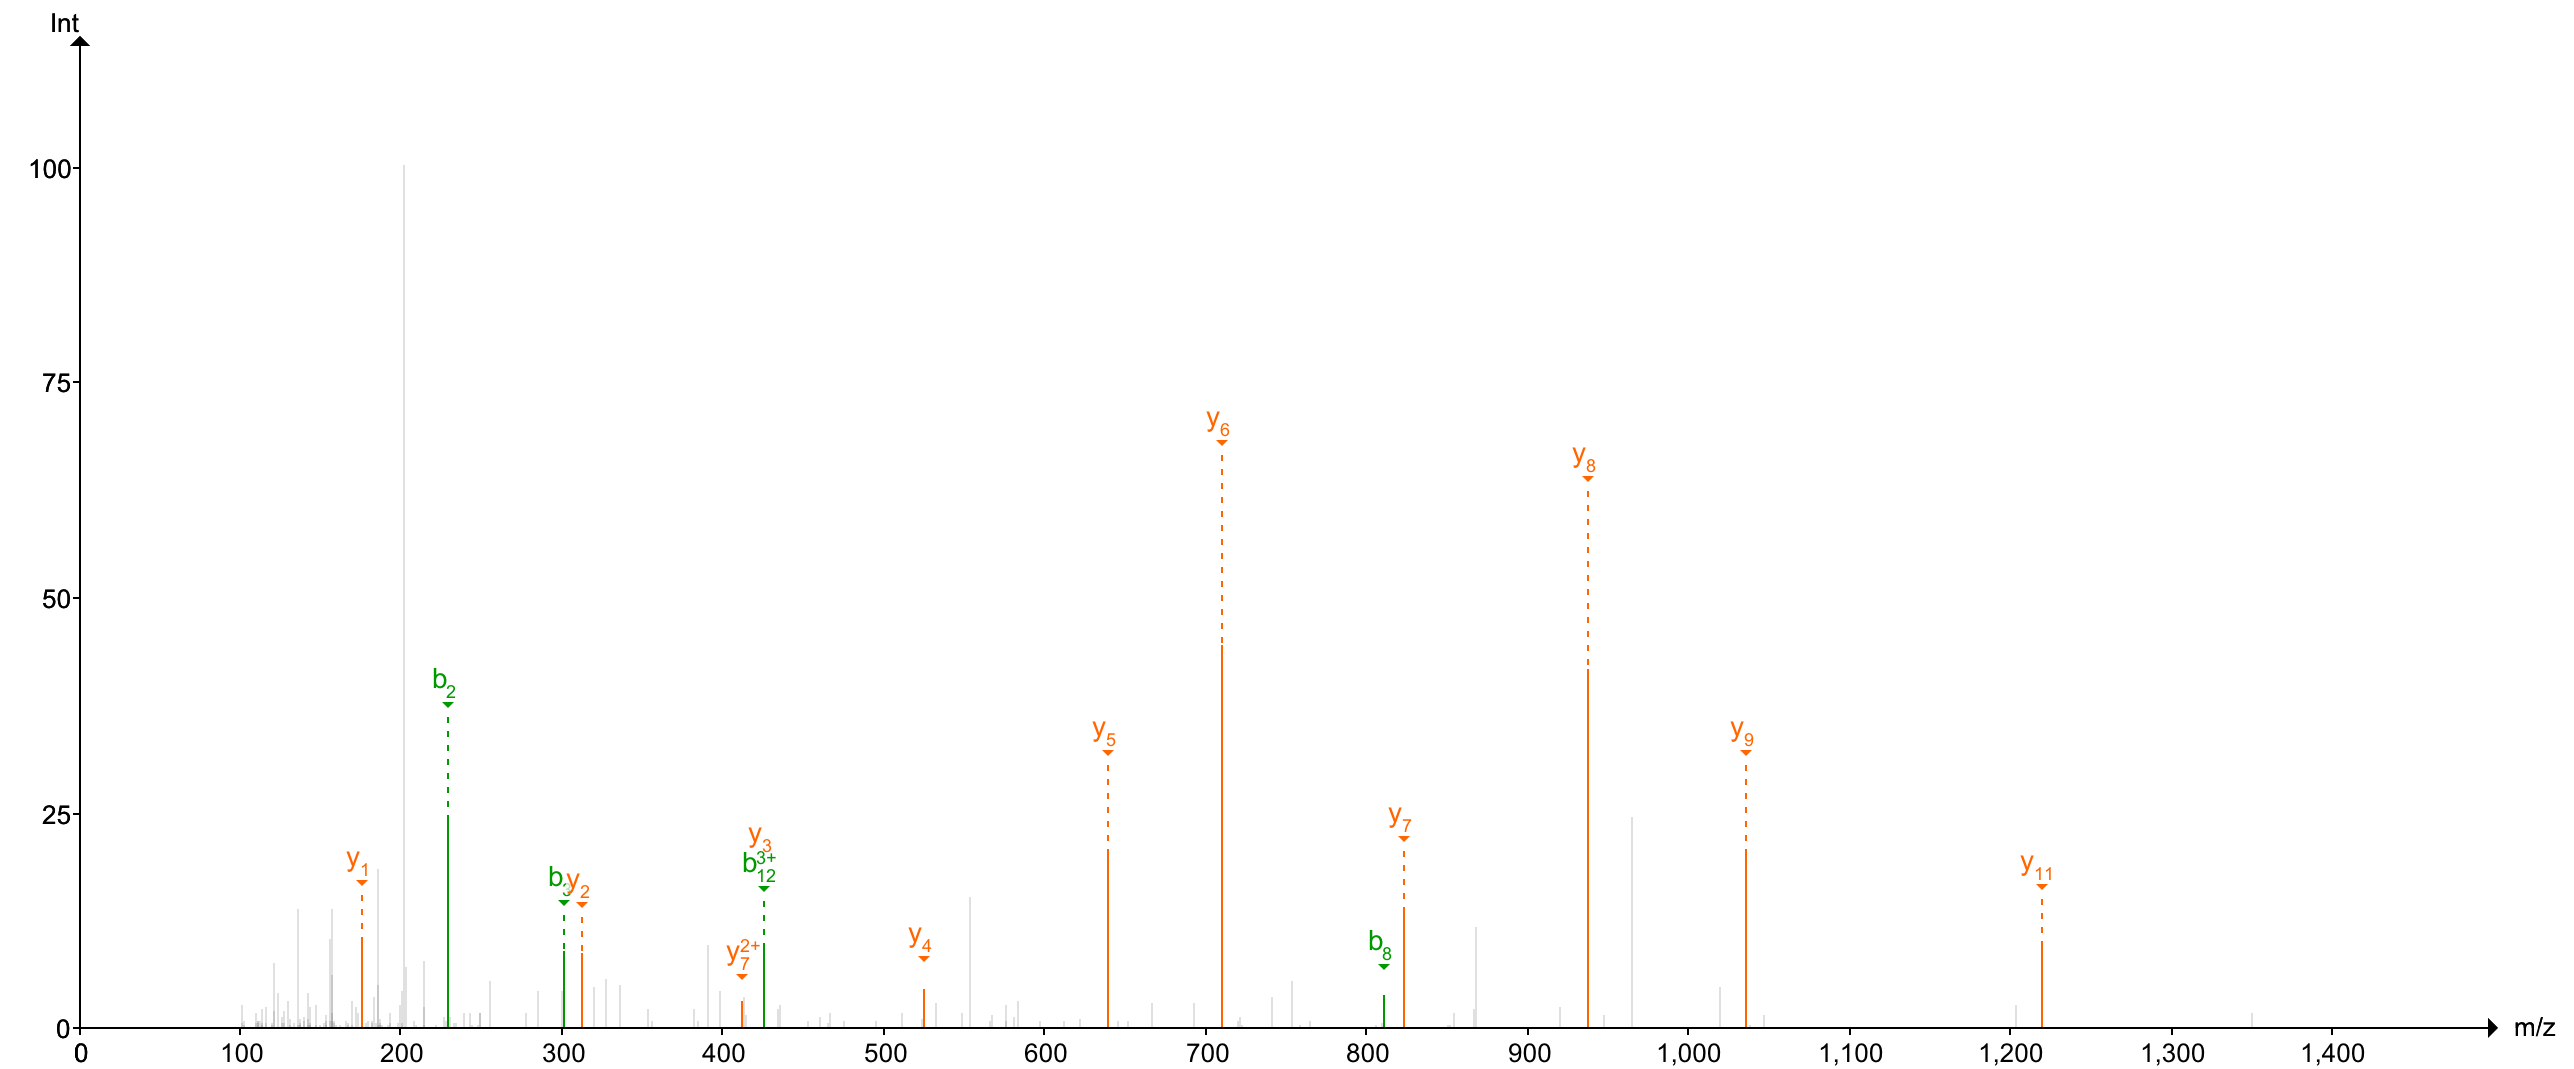

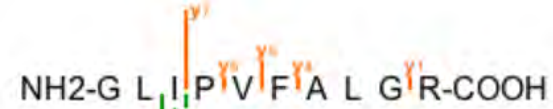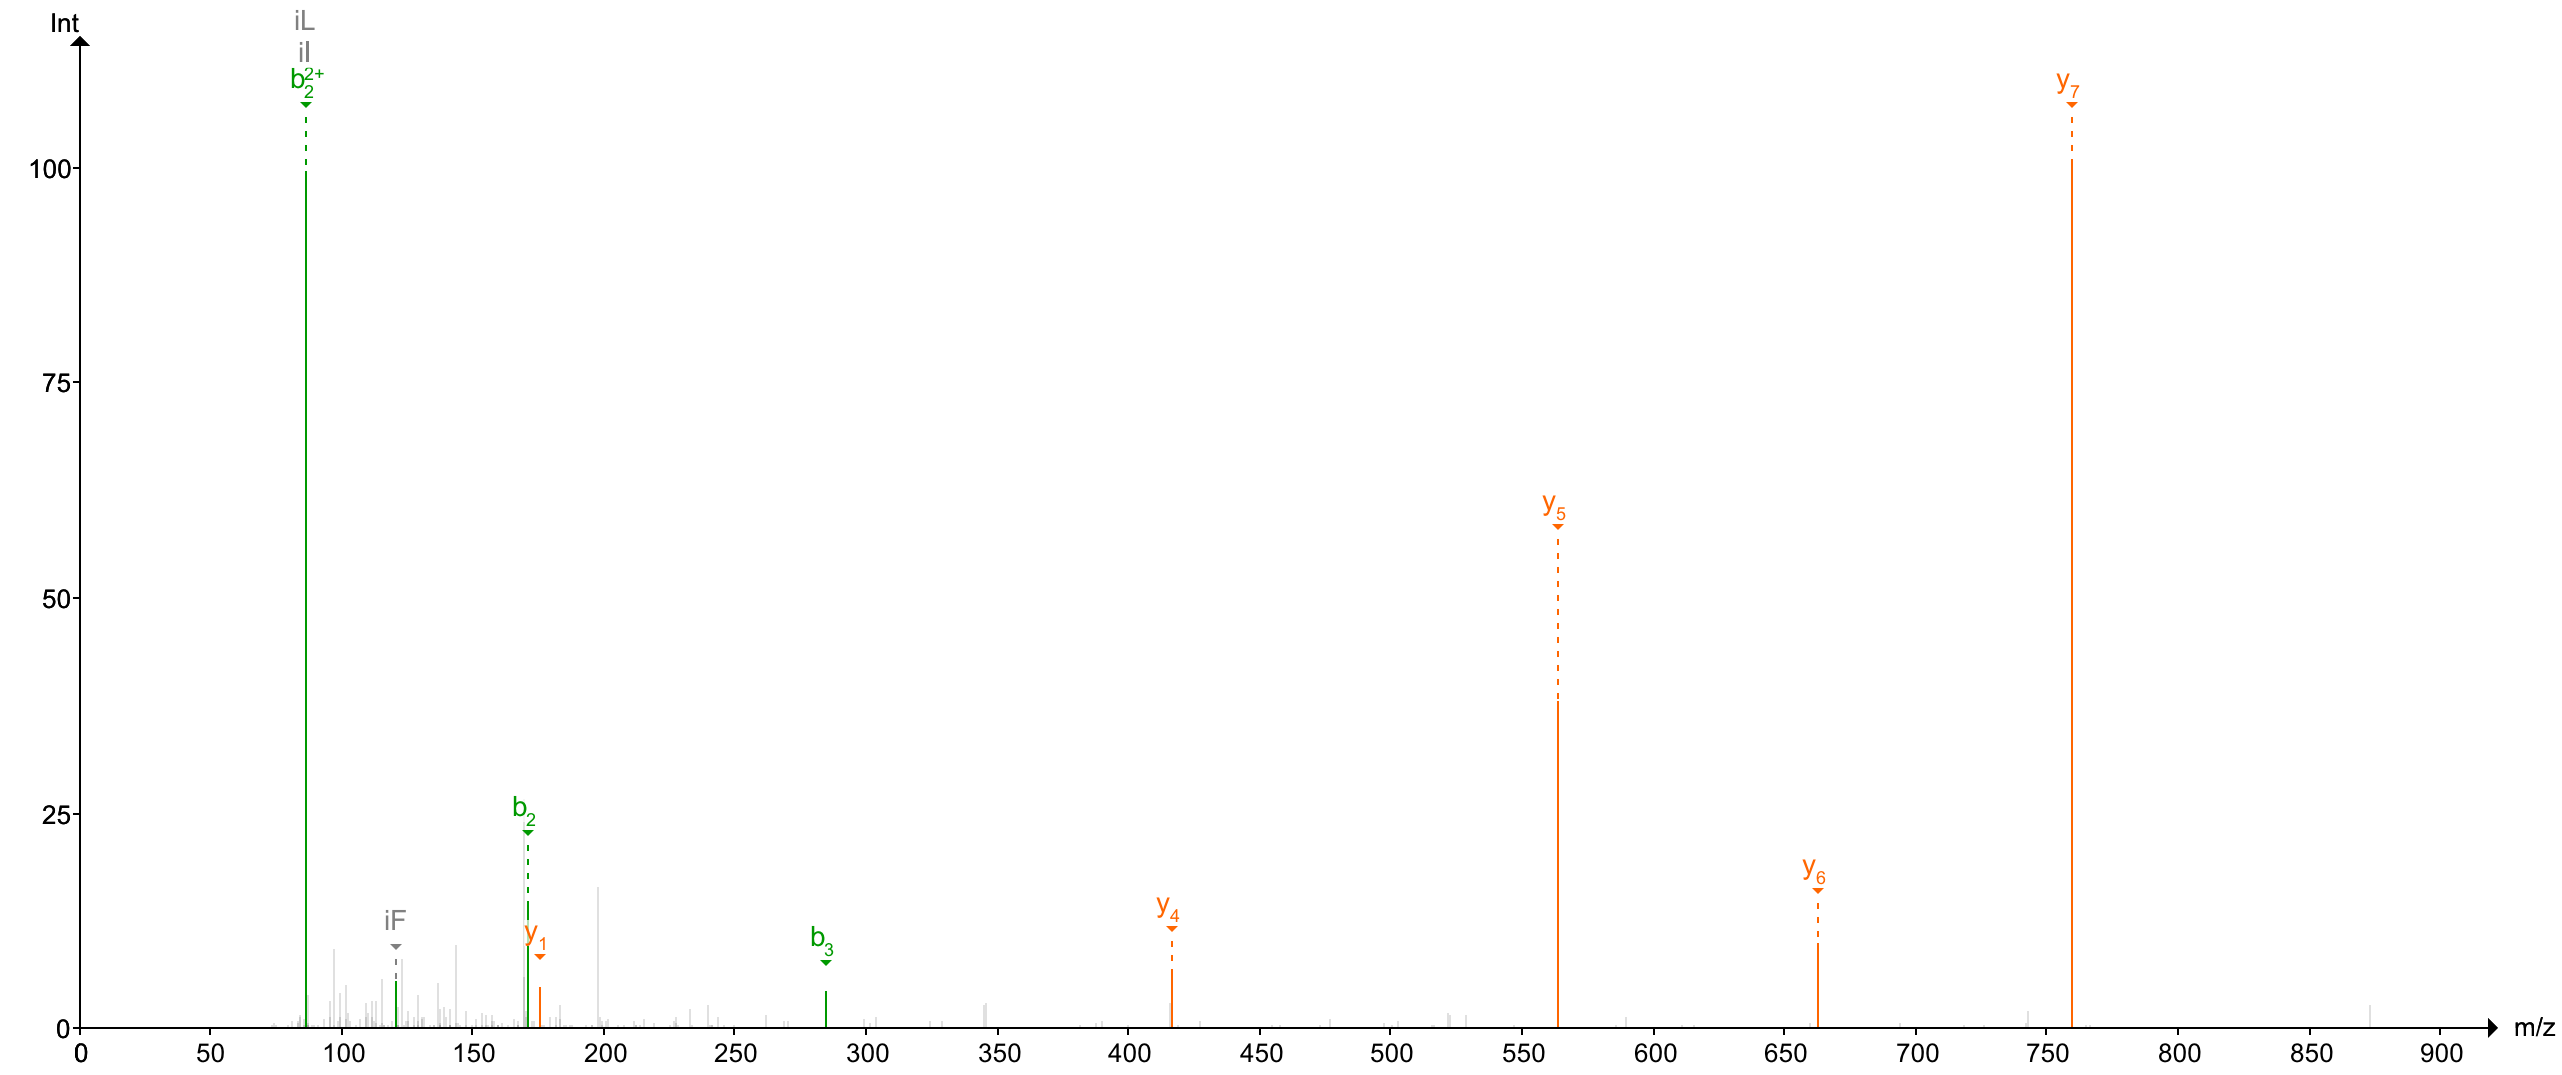

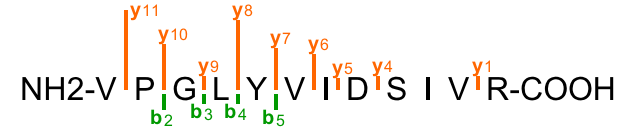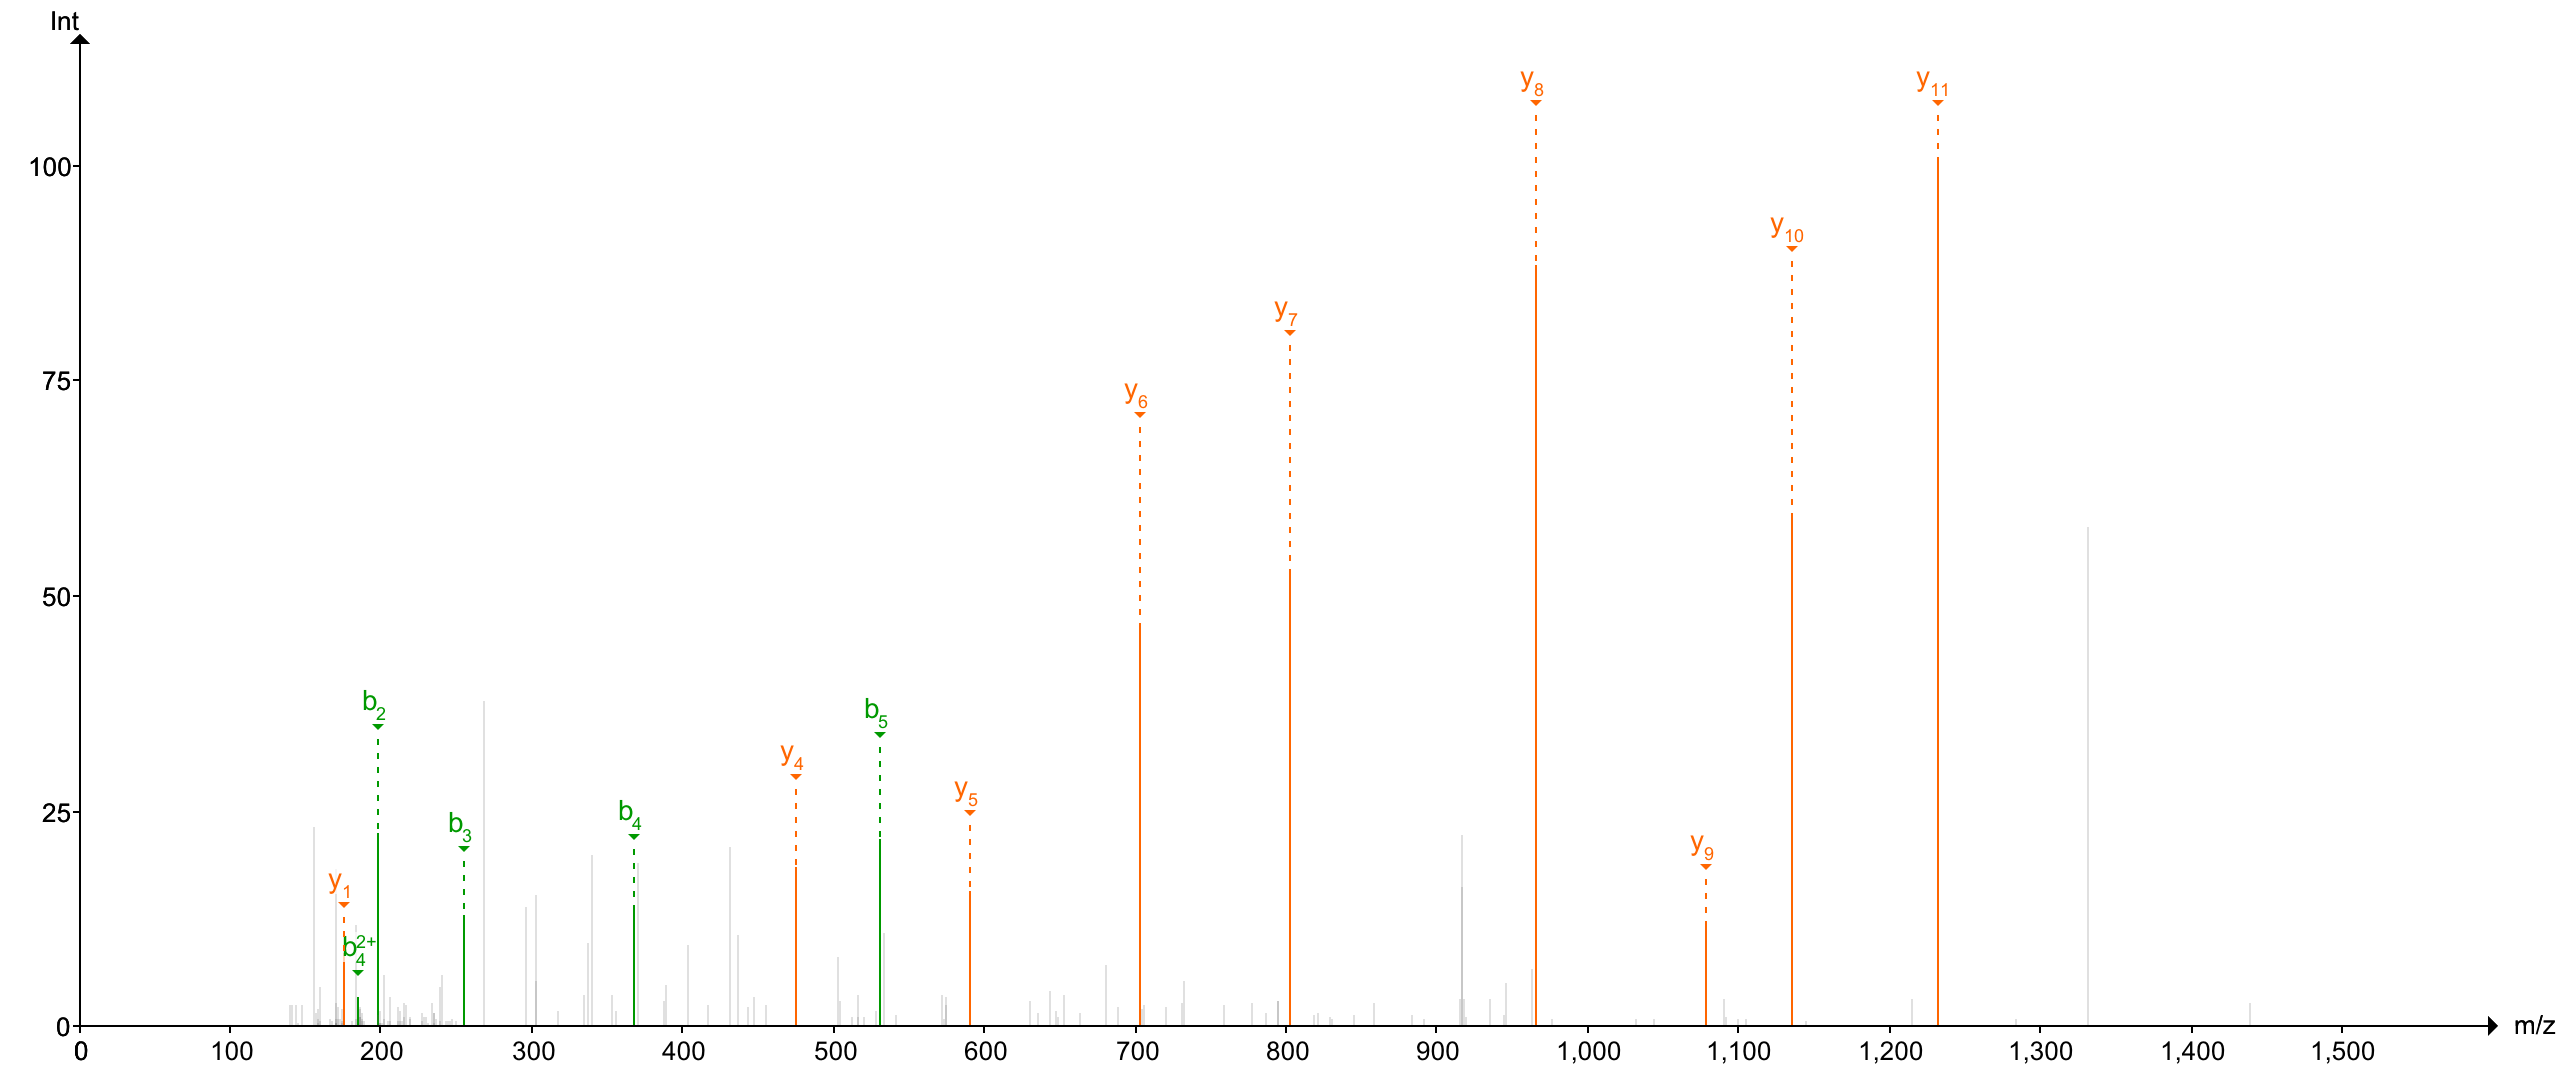

NH<sub>2</sub>-V L S I V D E S I I K P I E Q E F F T A P F E K-COOH

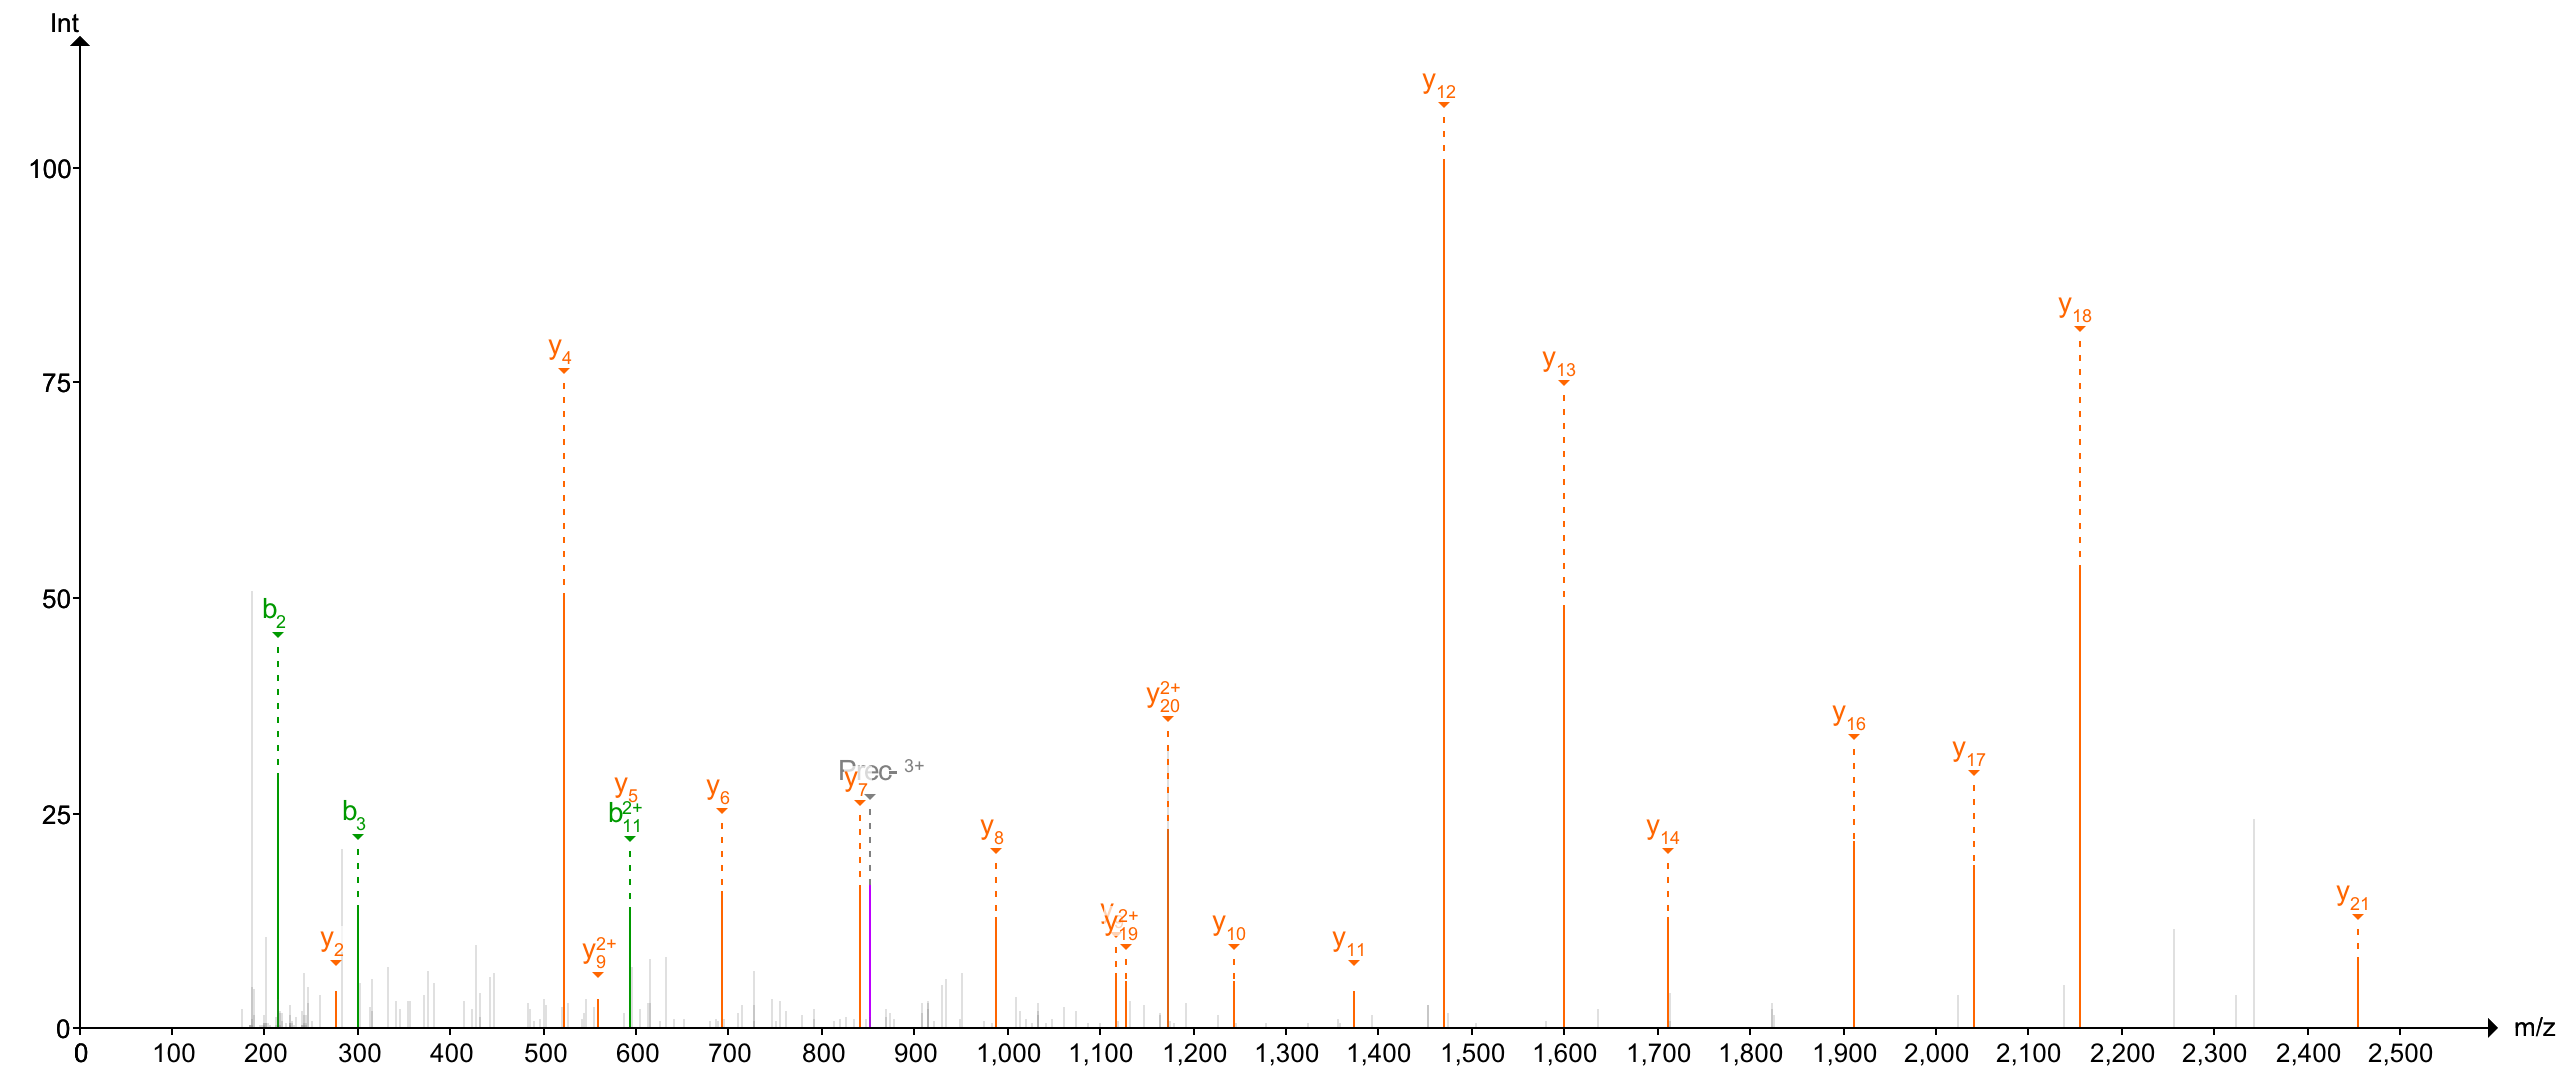

NH<sub>2</sub>-L F E I D P T S I G V V S L V G K-COOH

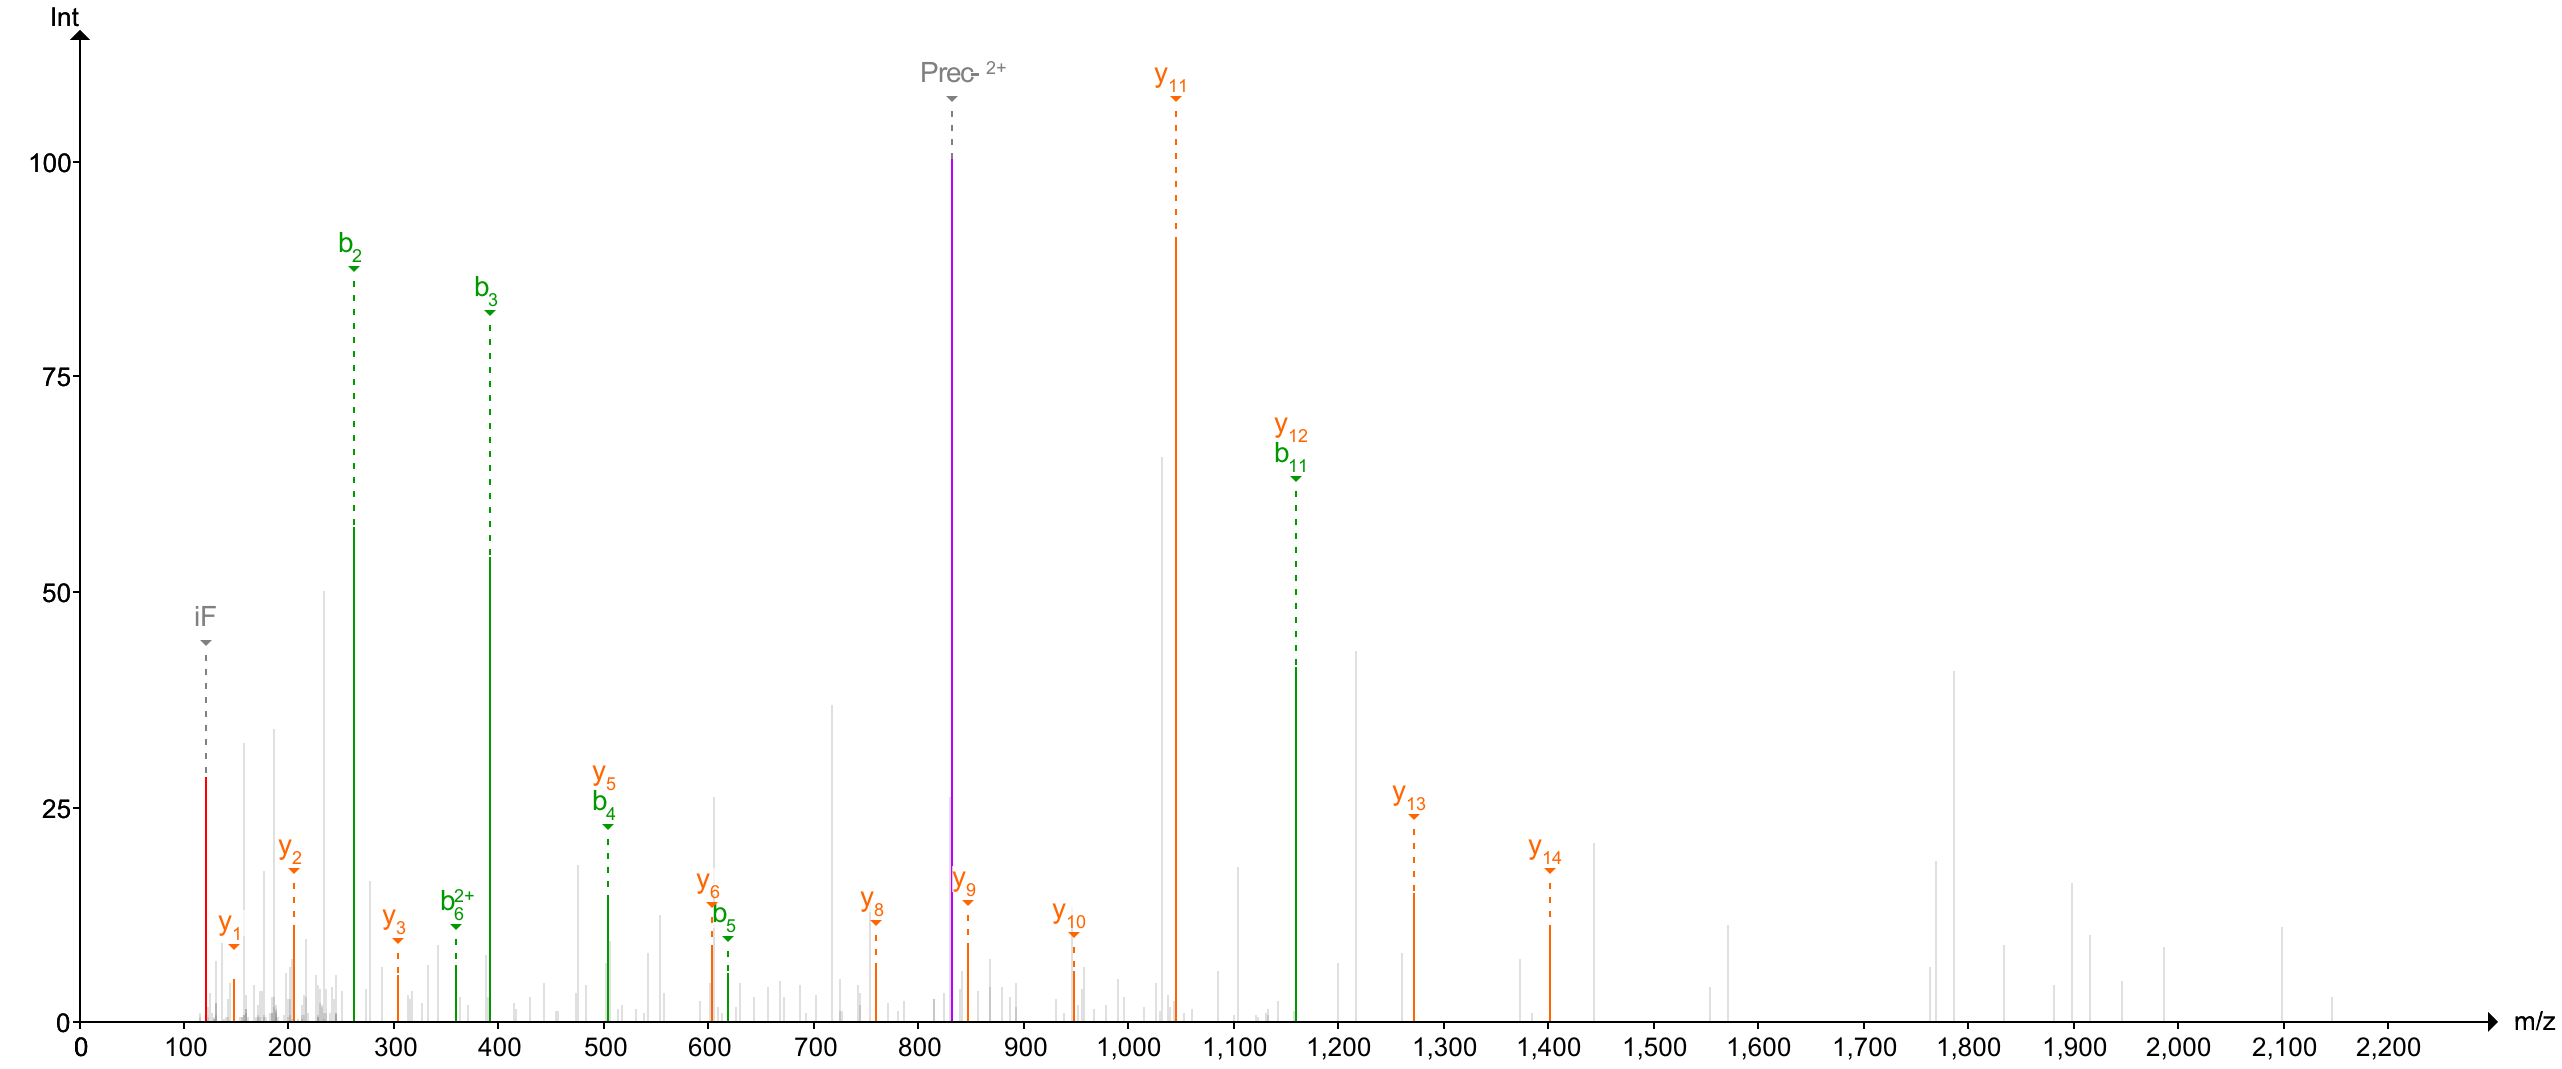

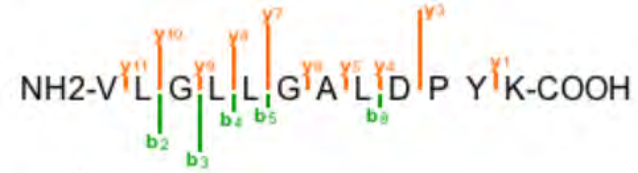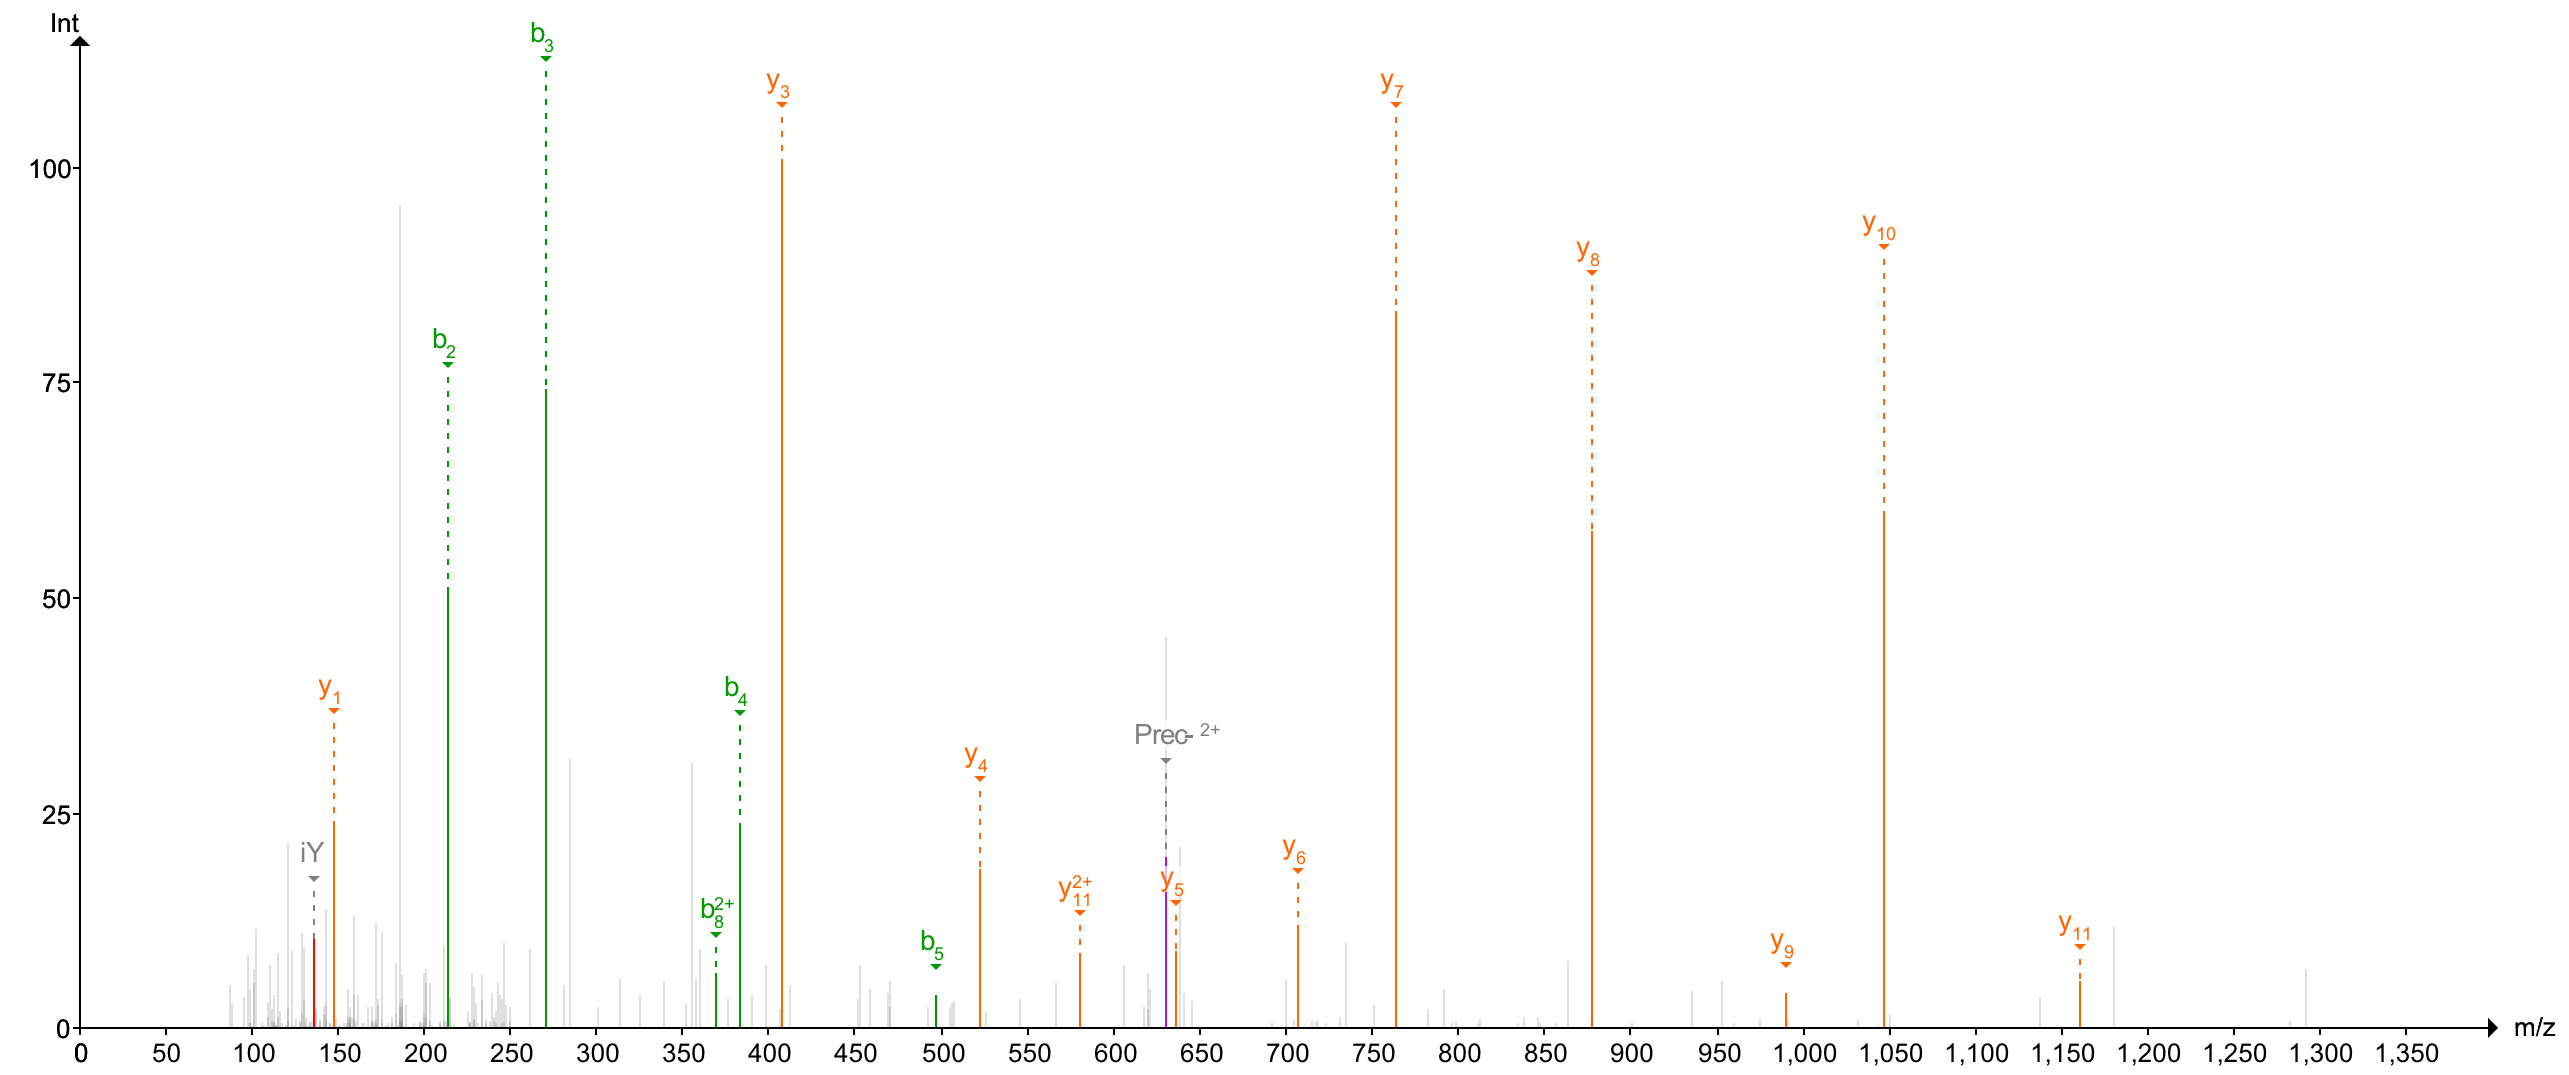

NH<sub>2</sub>-V T E N I P Q I I S F I E G I I A R-COOH

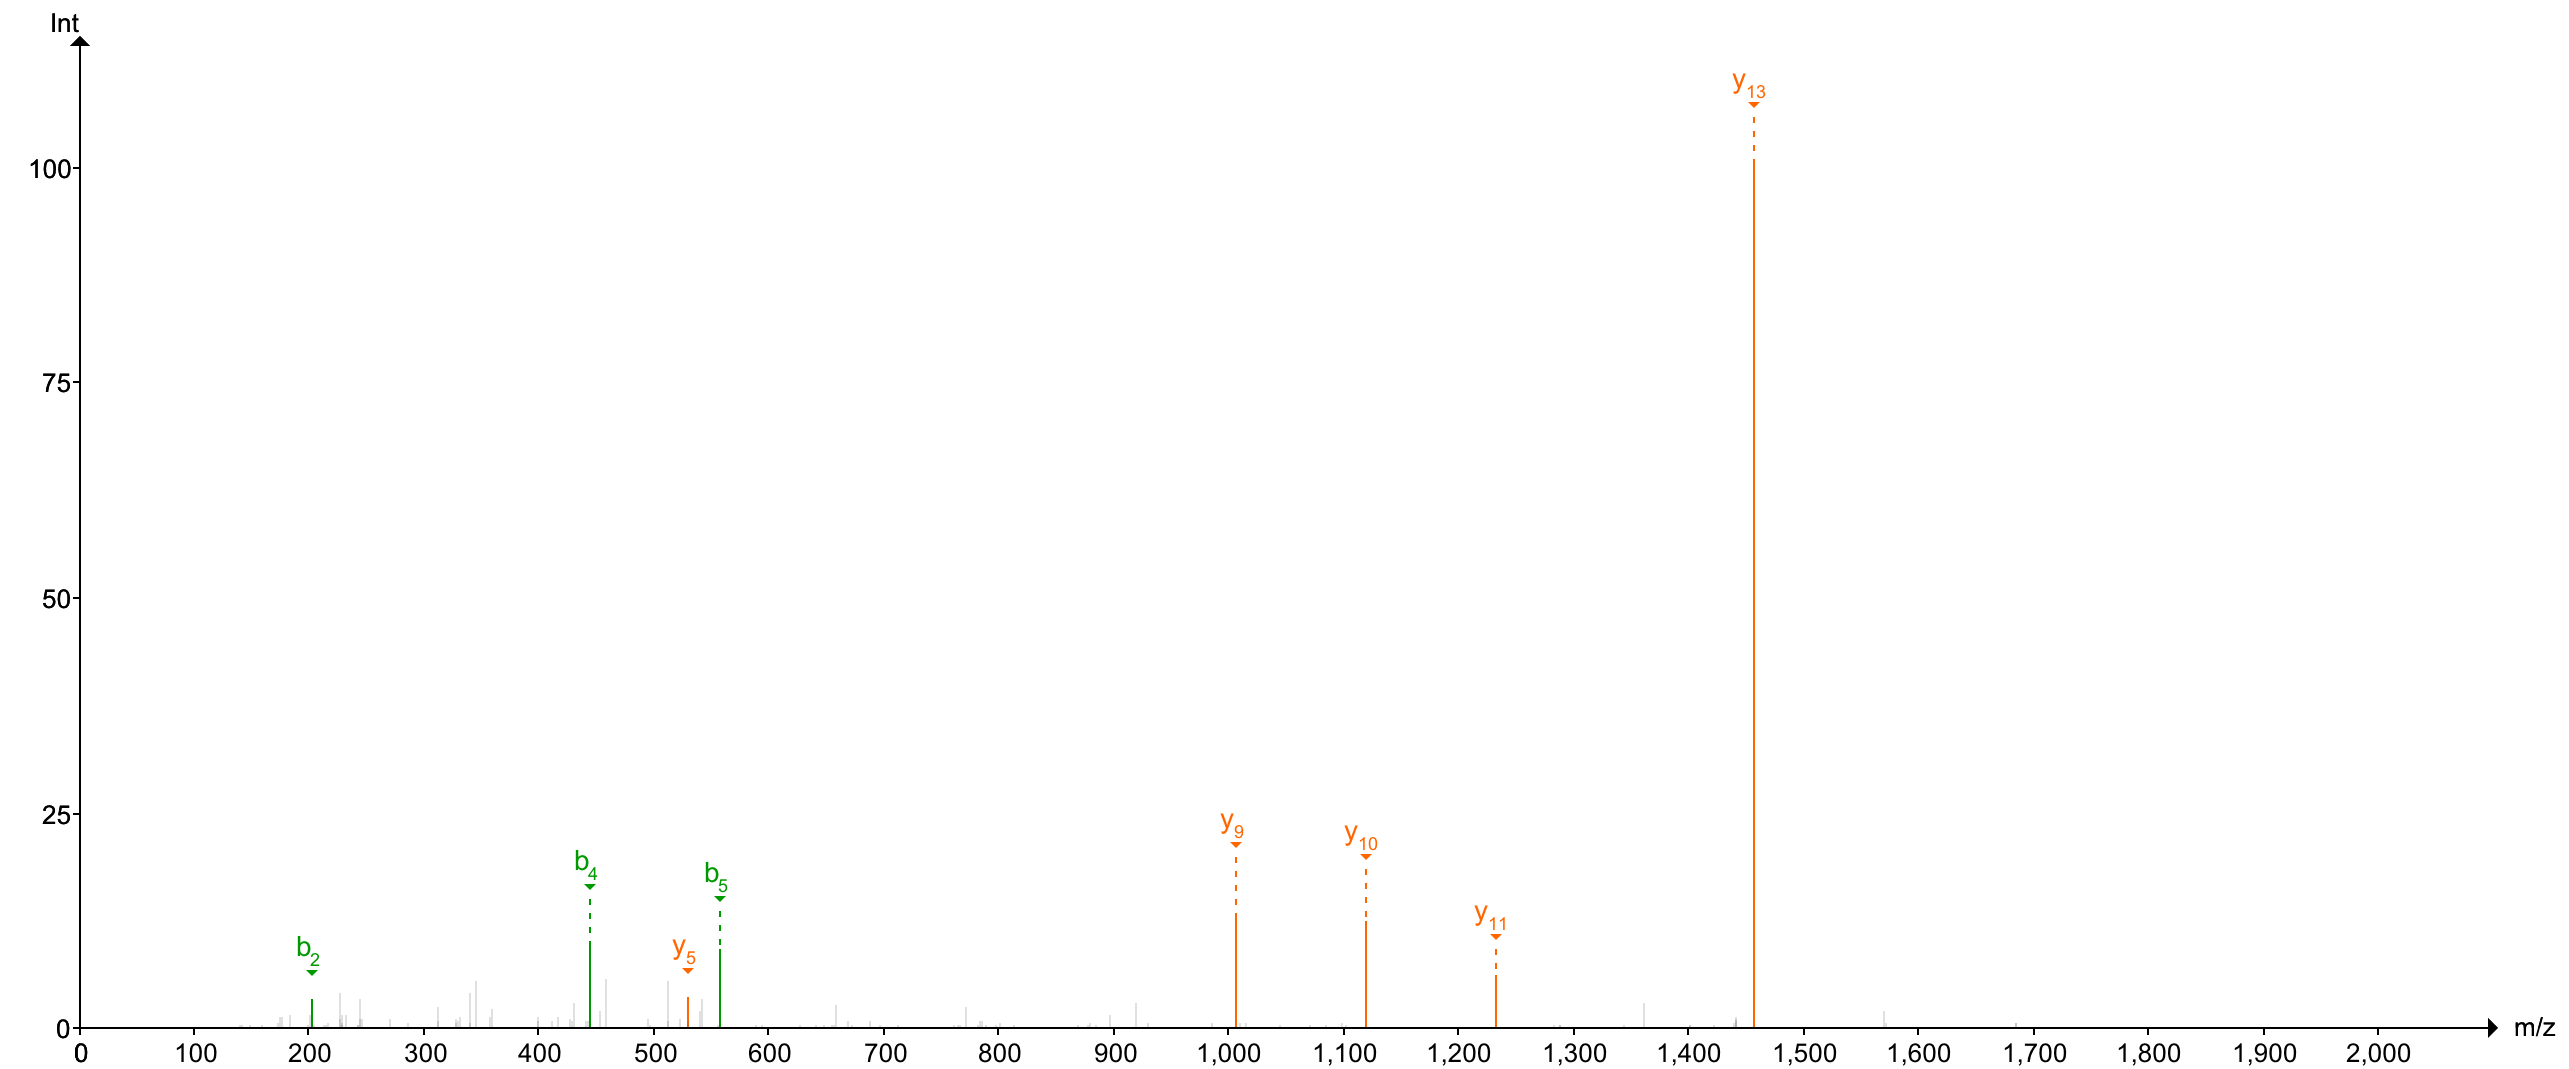

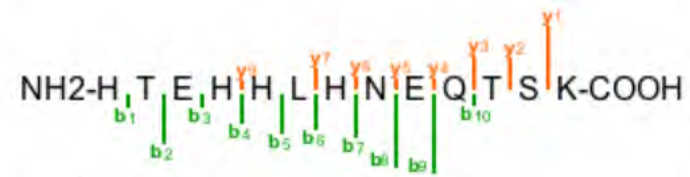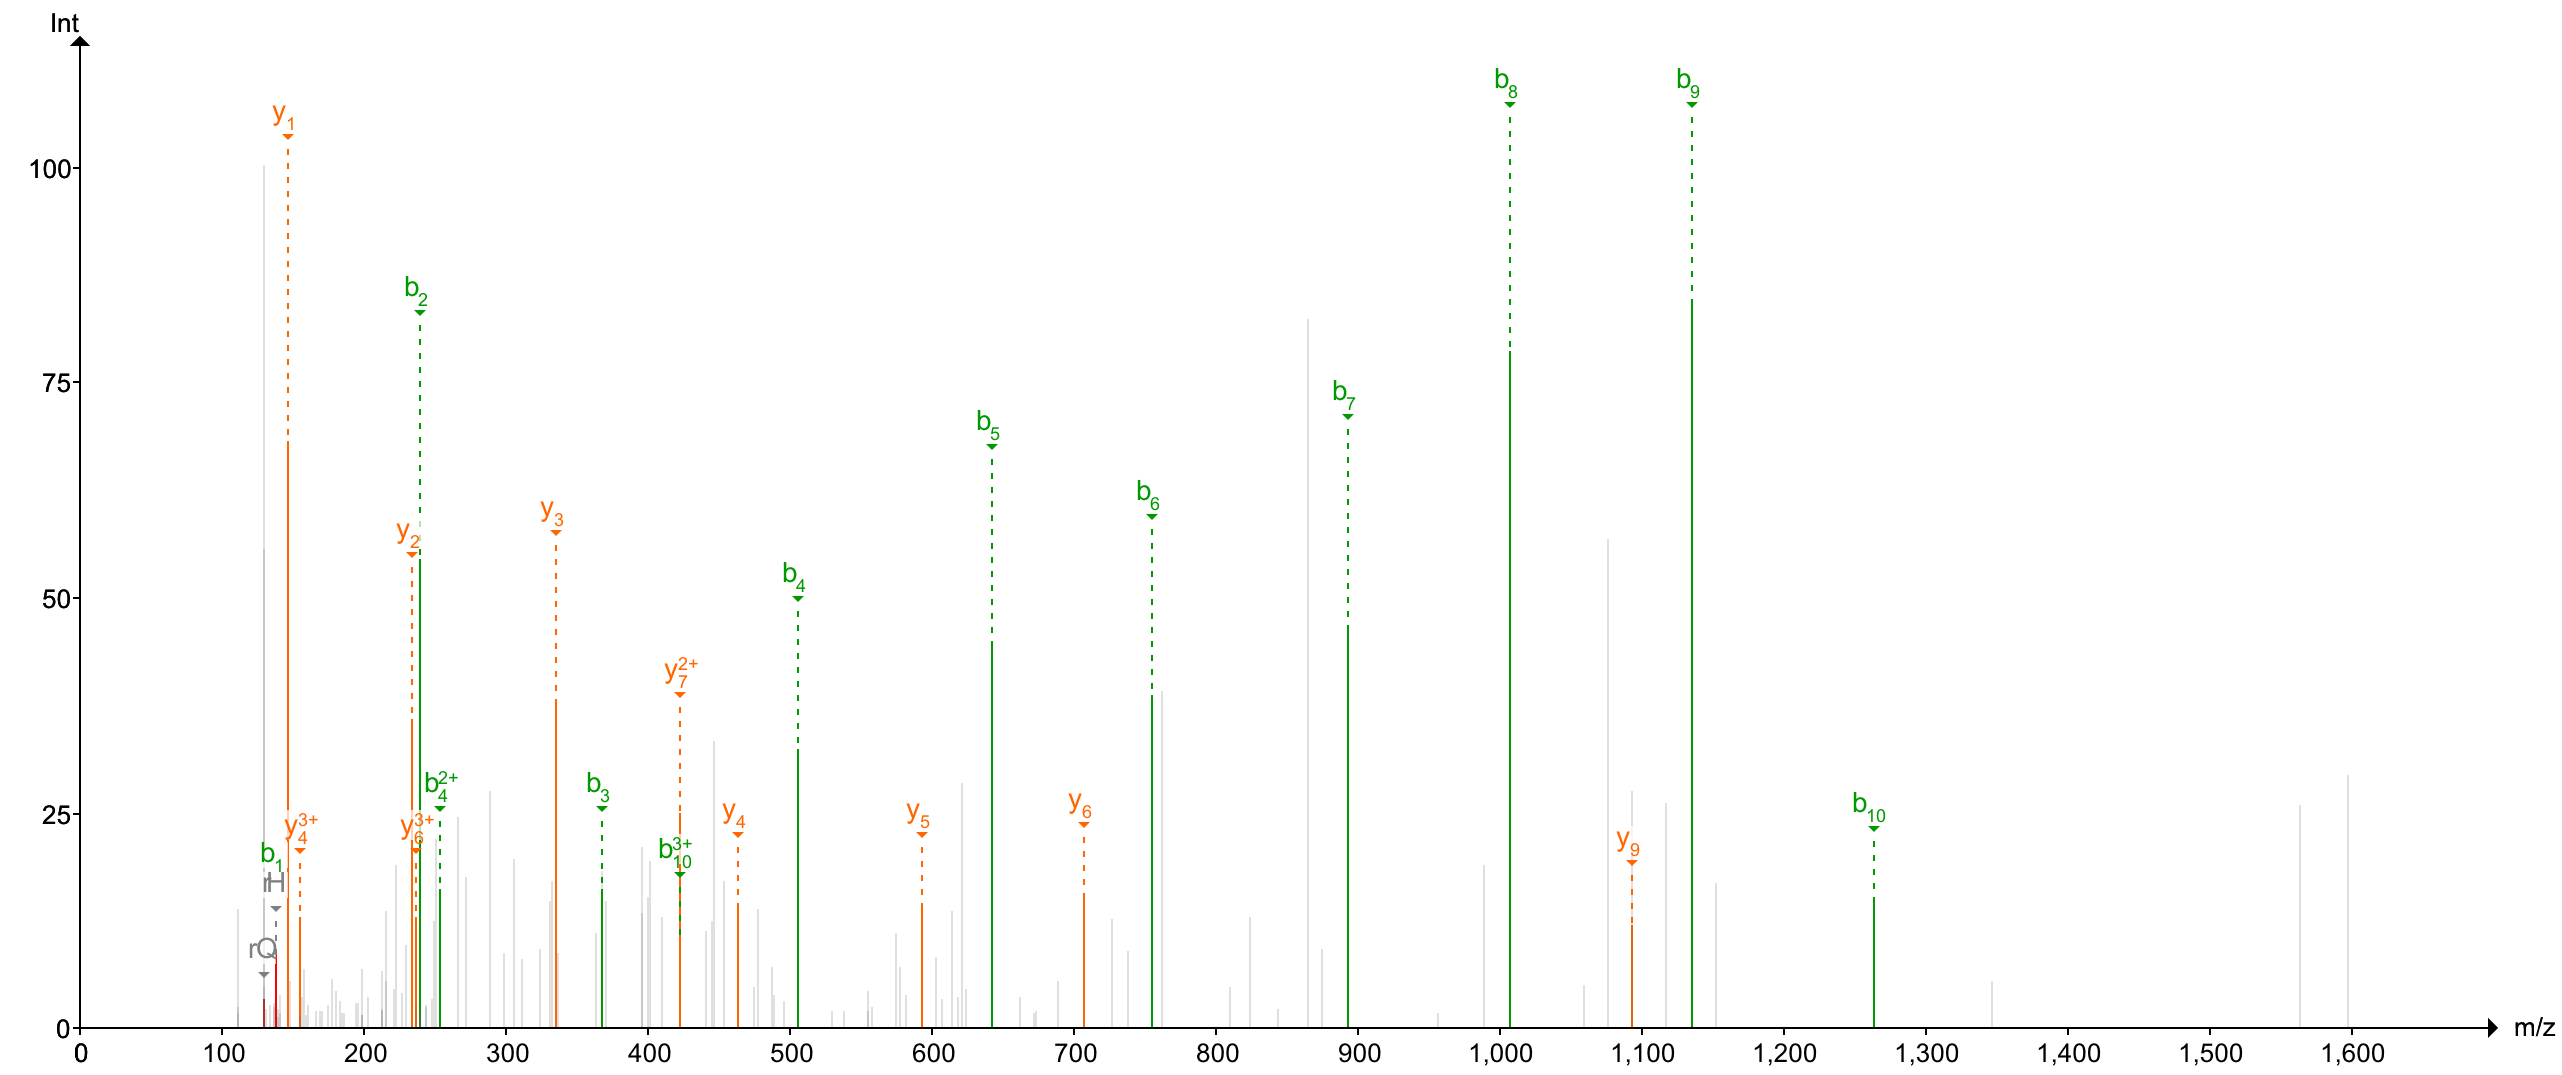



NH<sub>2</sub>-H L Q Q E A E K-COOH

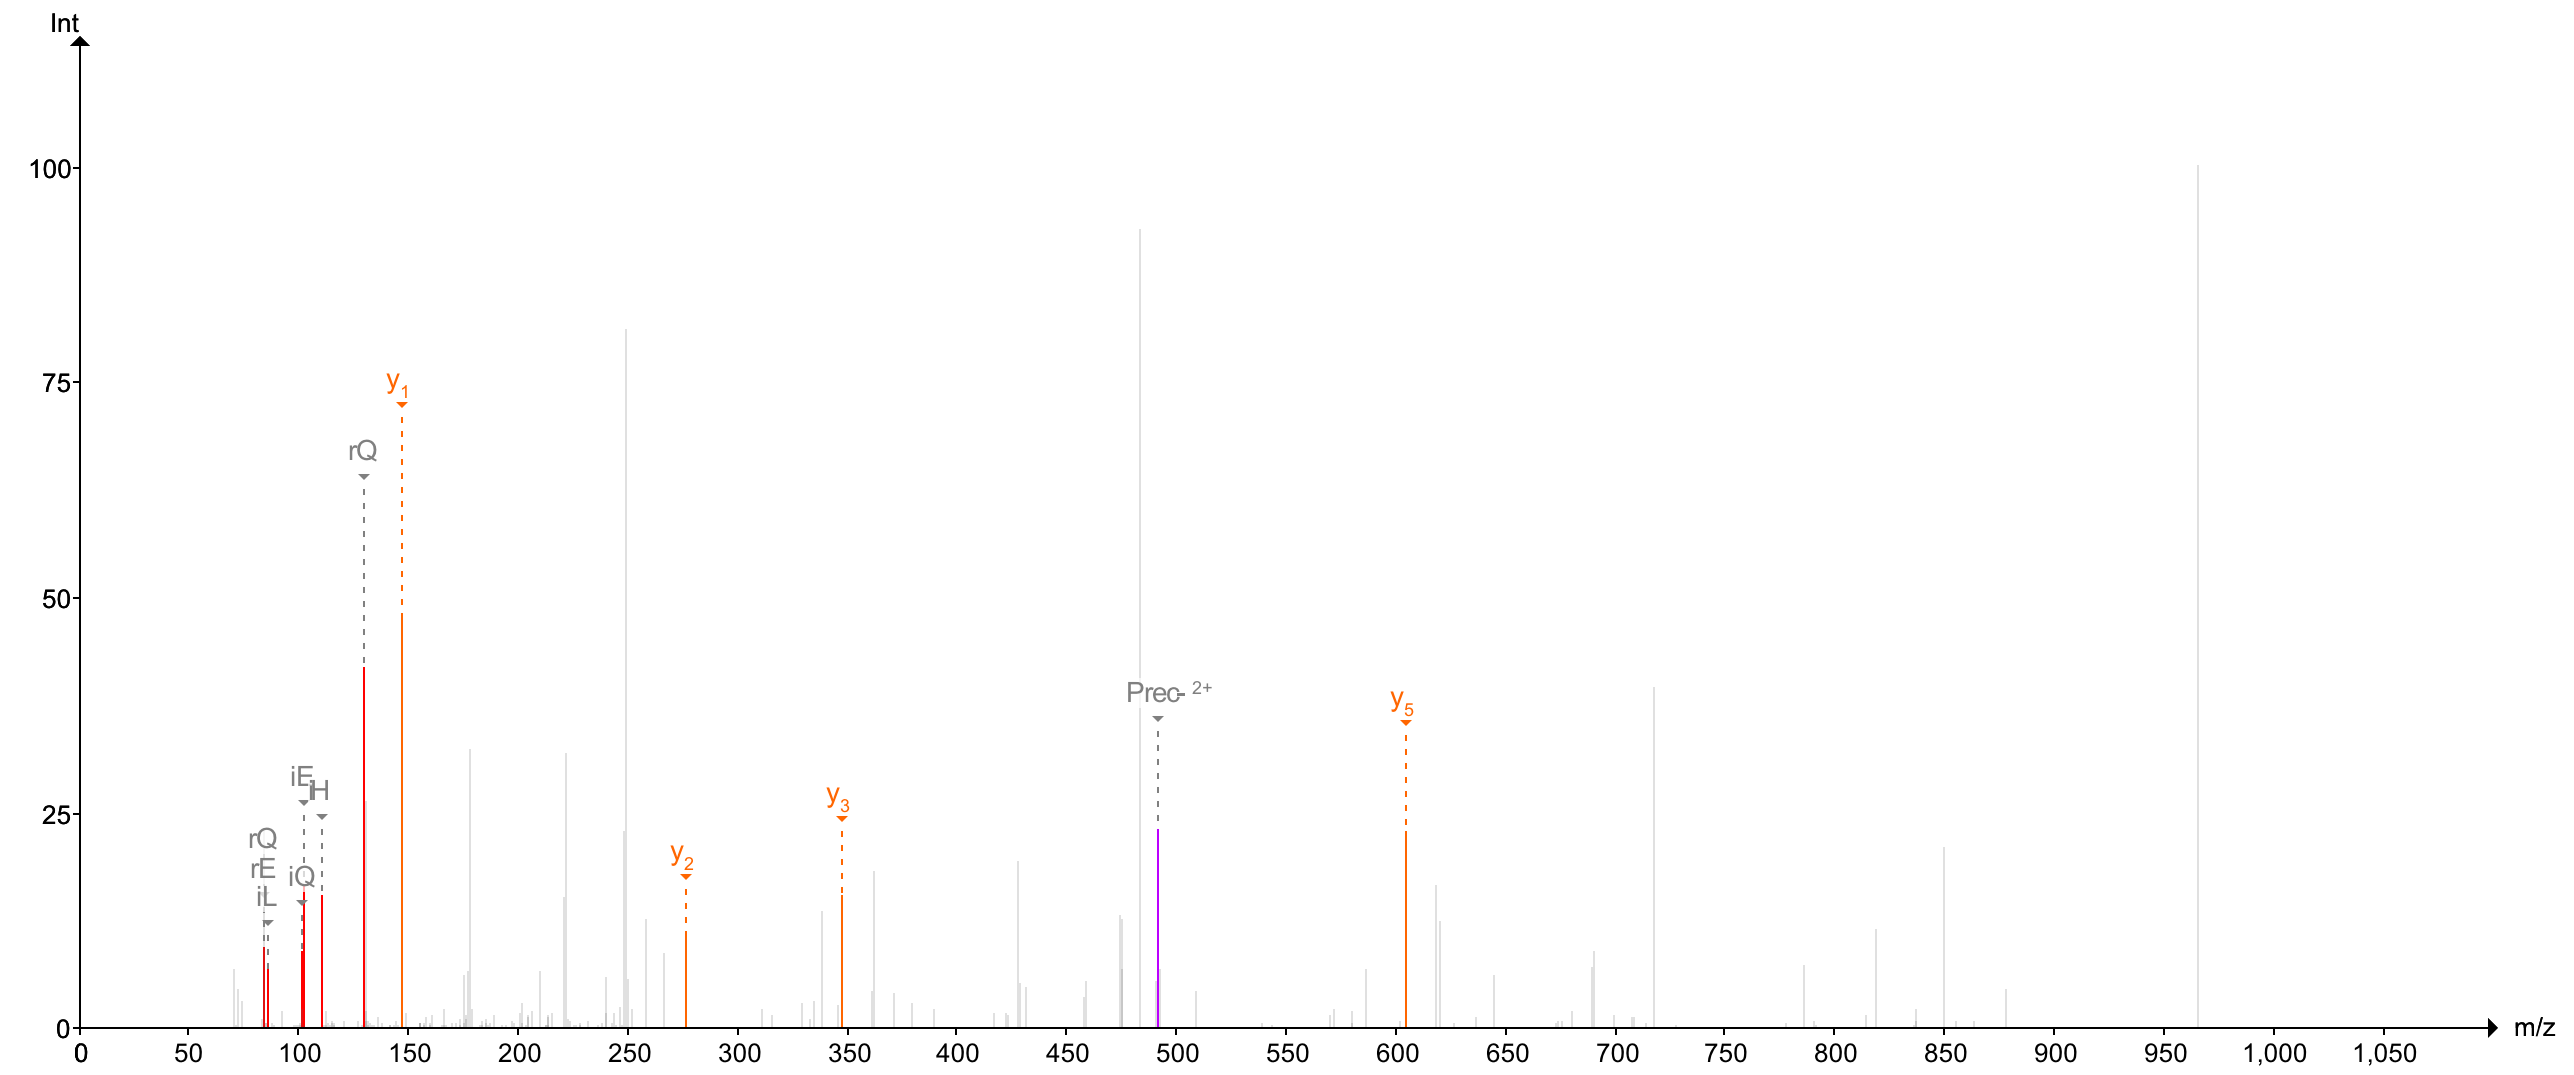

NH<sub>2</sub>-N<sub>1</sub>Q<sub>1</sub>V<sub>1</sub>D<sub>1</sub>S<sub>1</sub>E<sub>1</sub>T<sub>1</sub>H<sub>1</sub>**C**<sub>1</sub>H<sub>1</sub>A<sub>1</sub>E<sub>1</sub>R-COOH

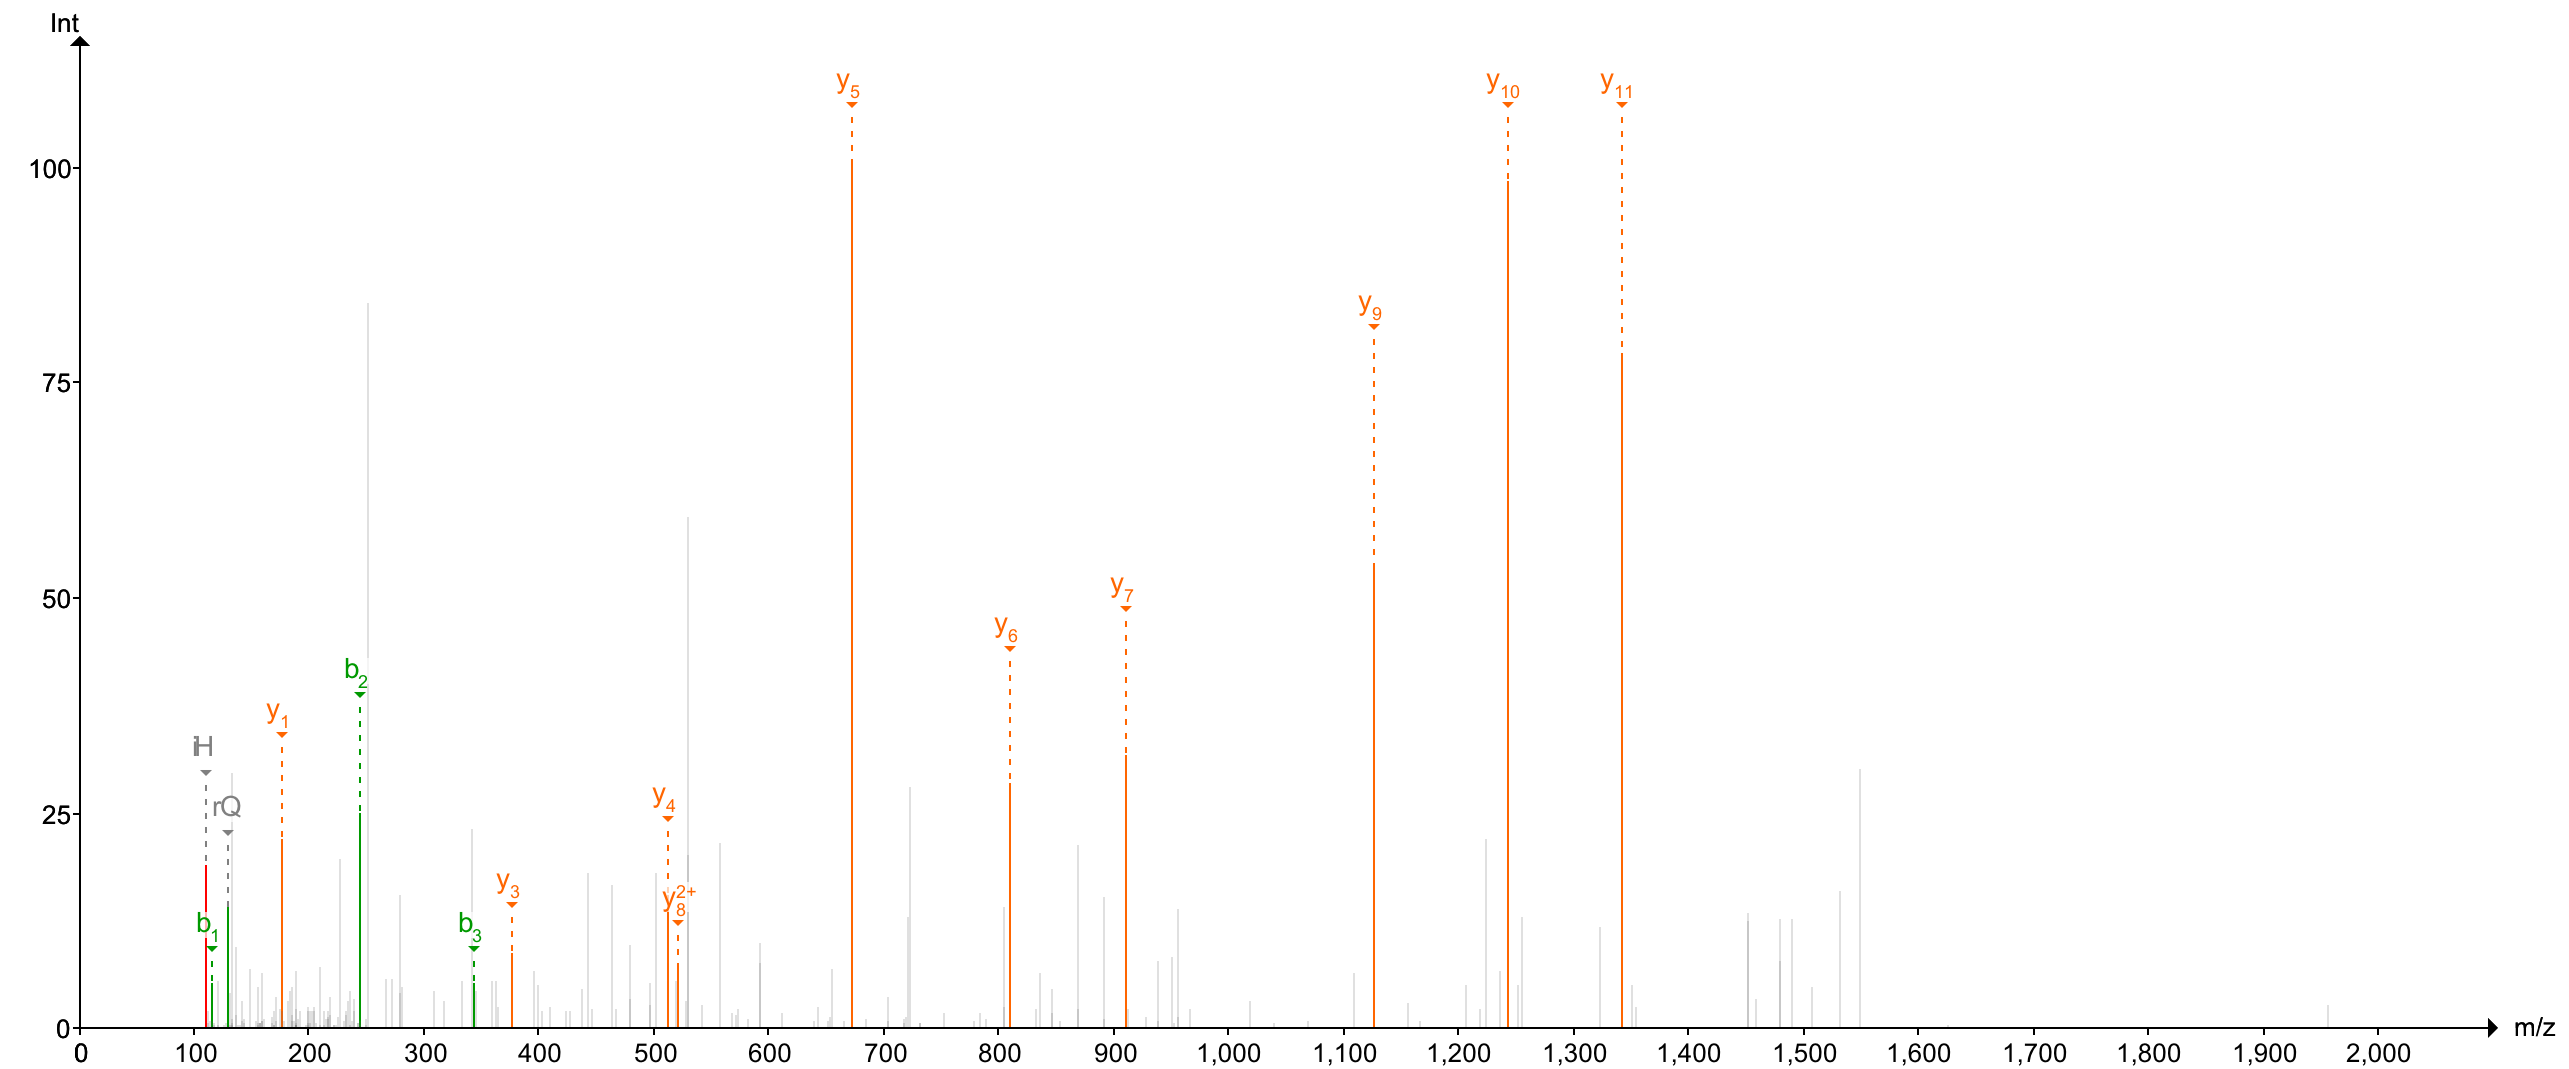

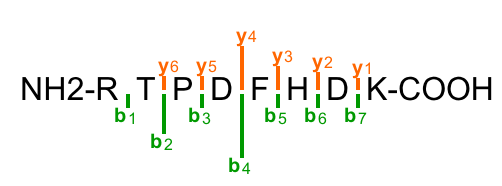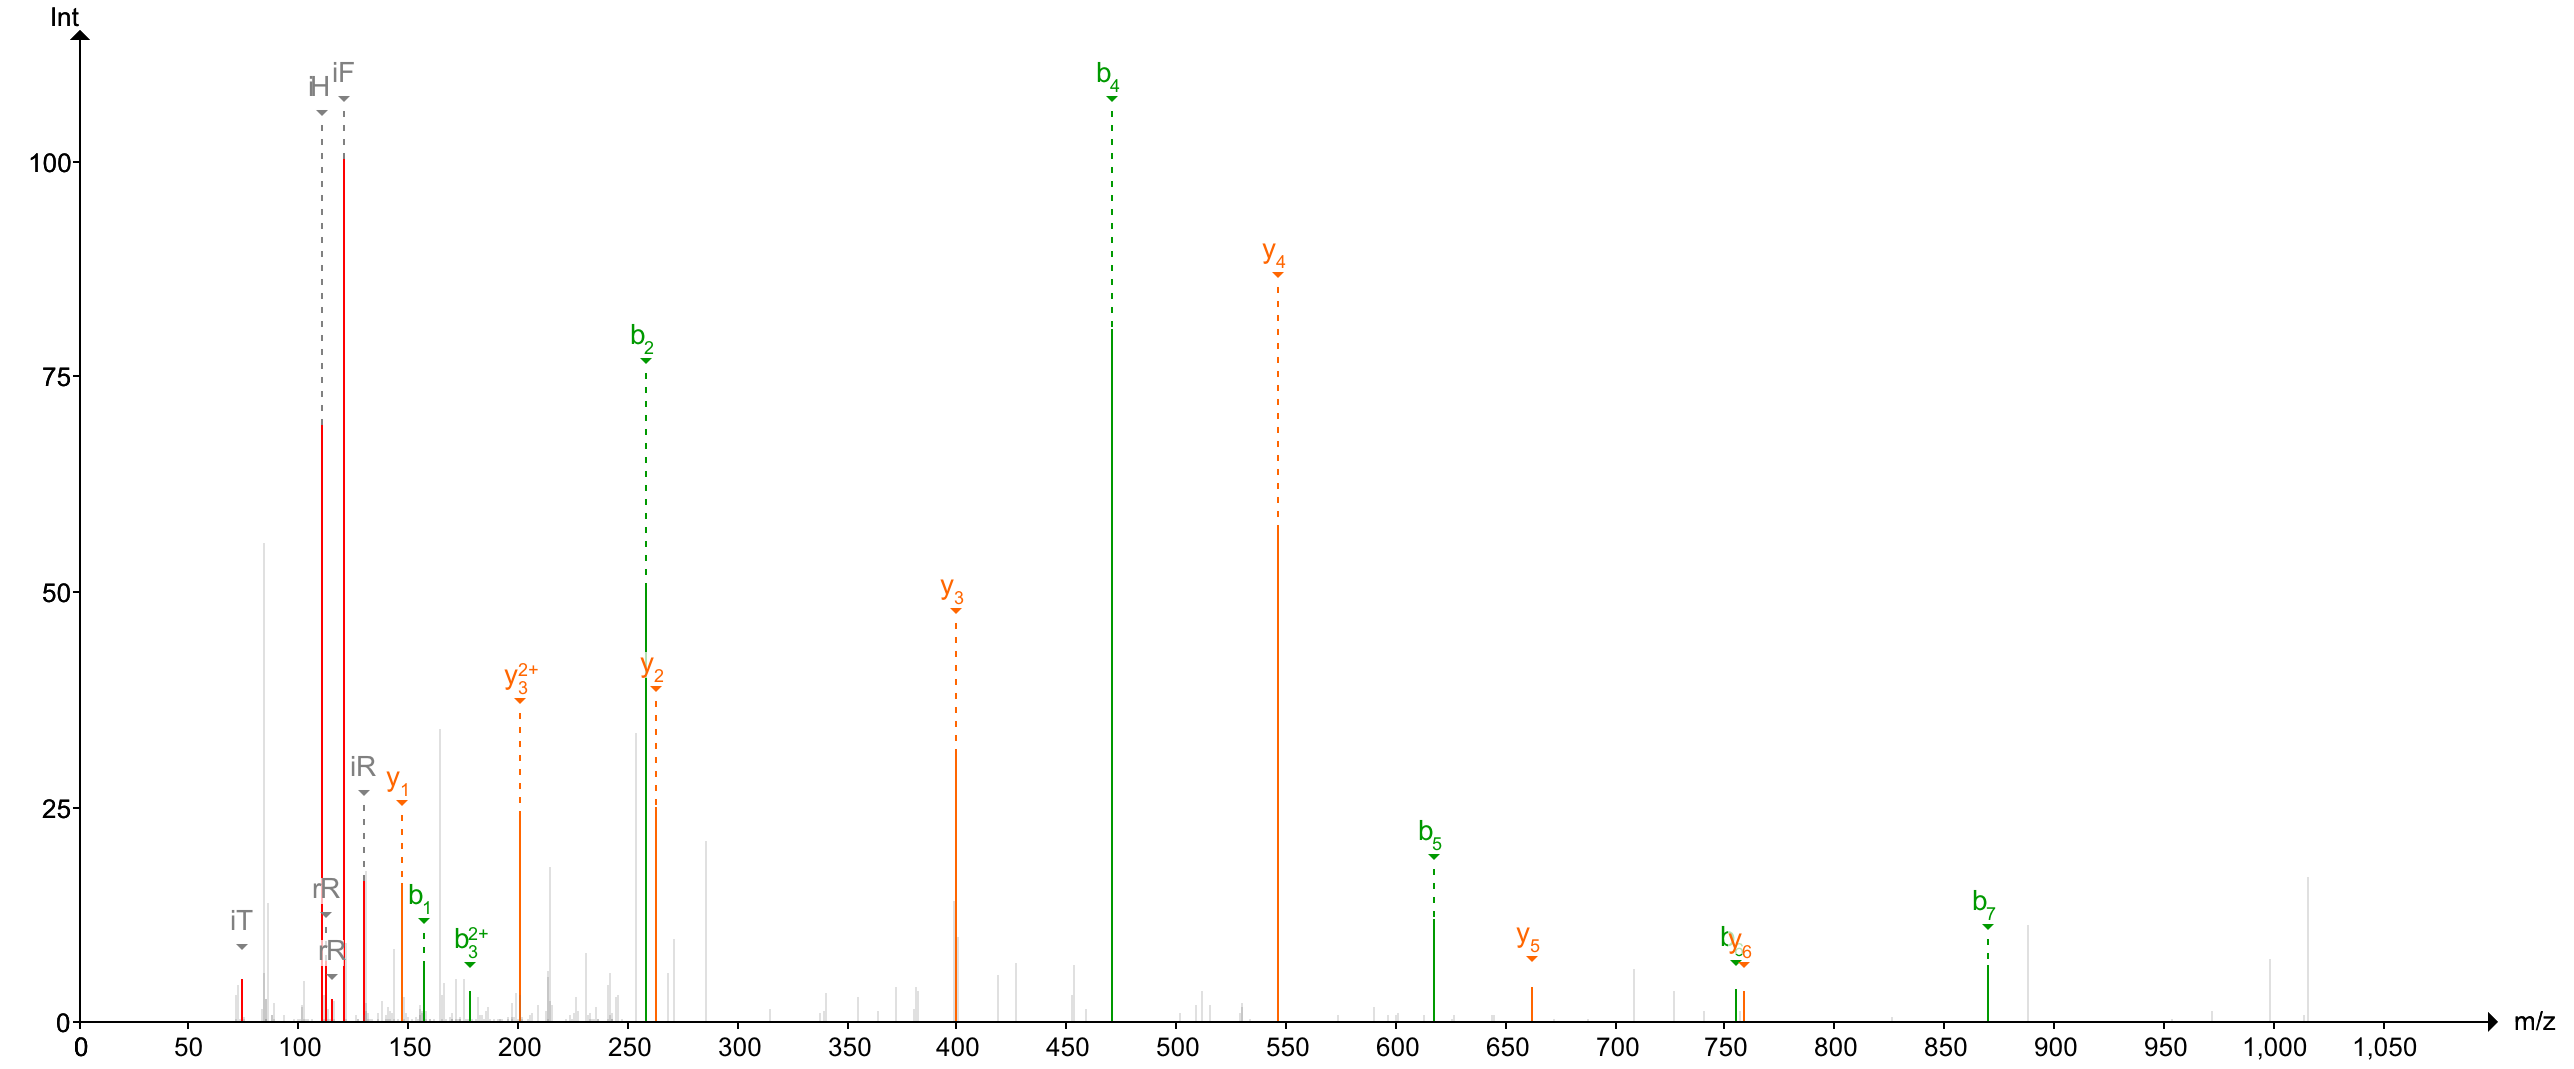

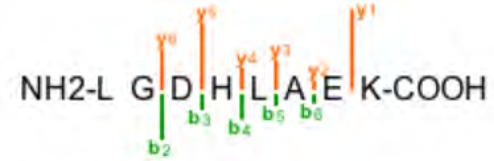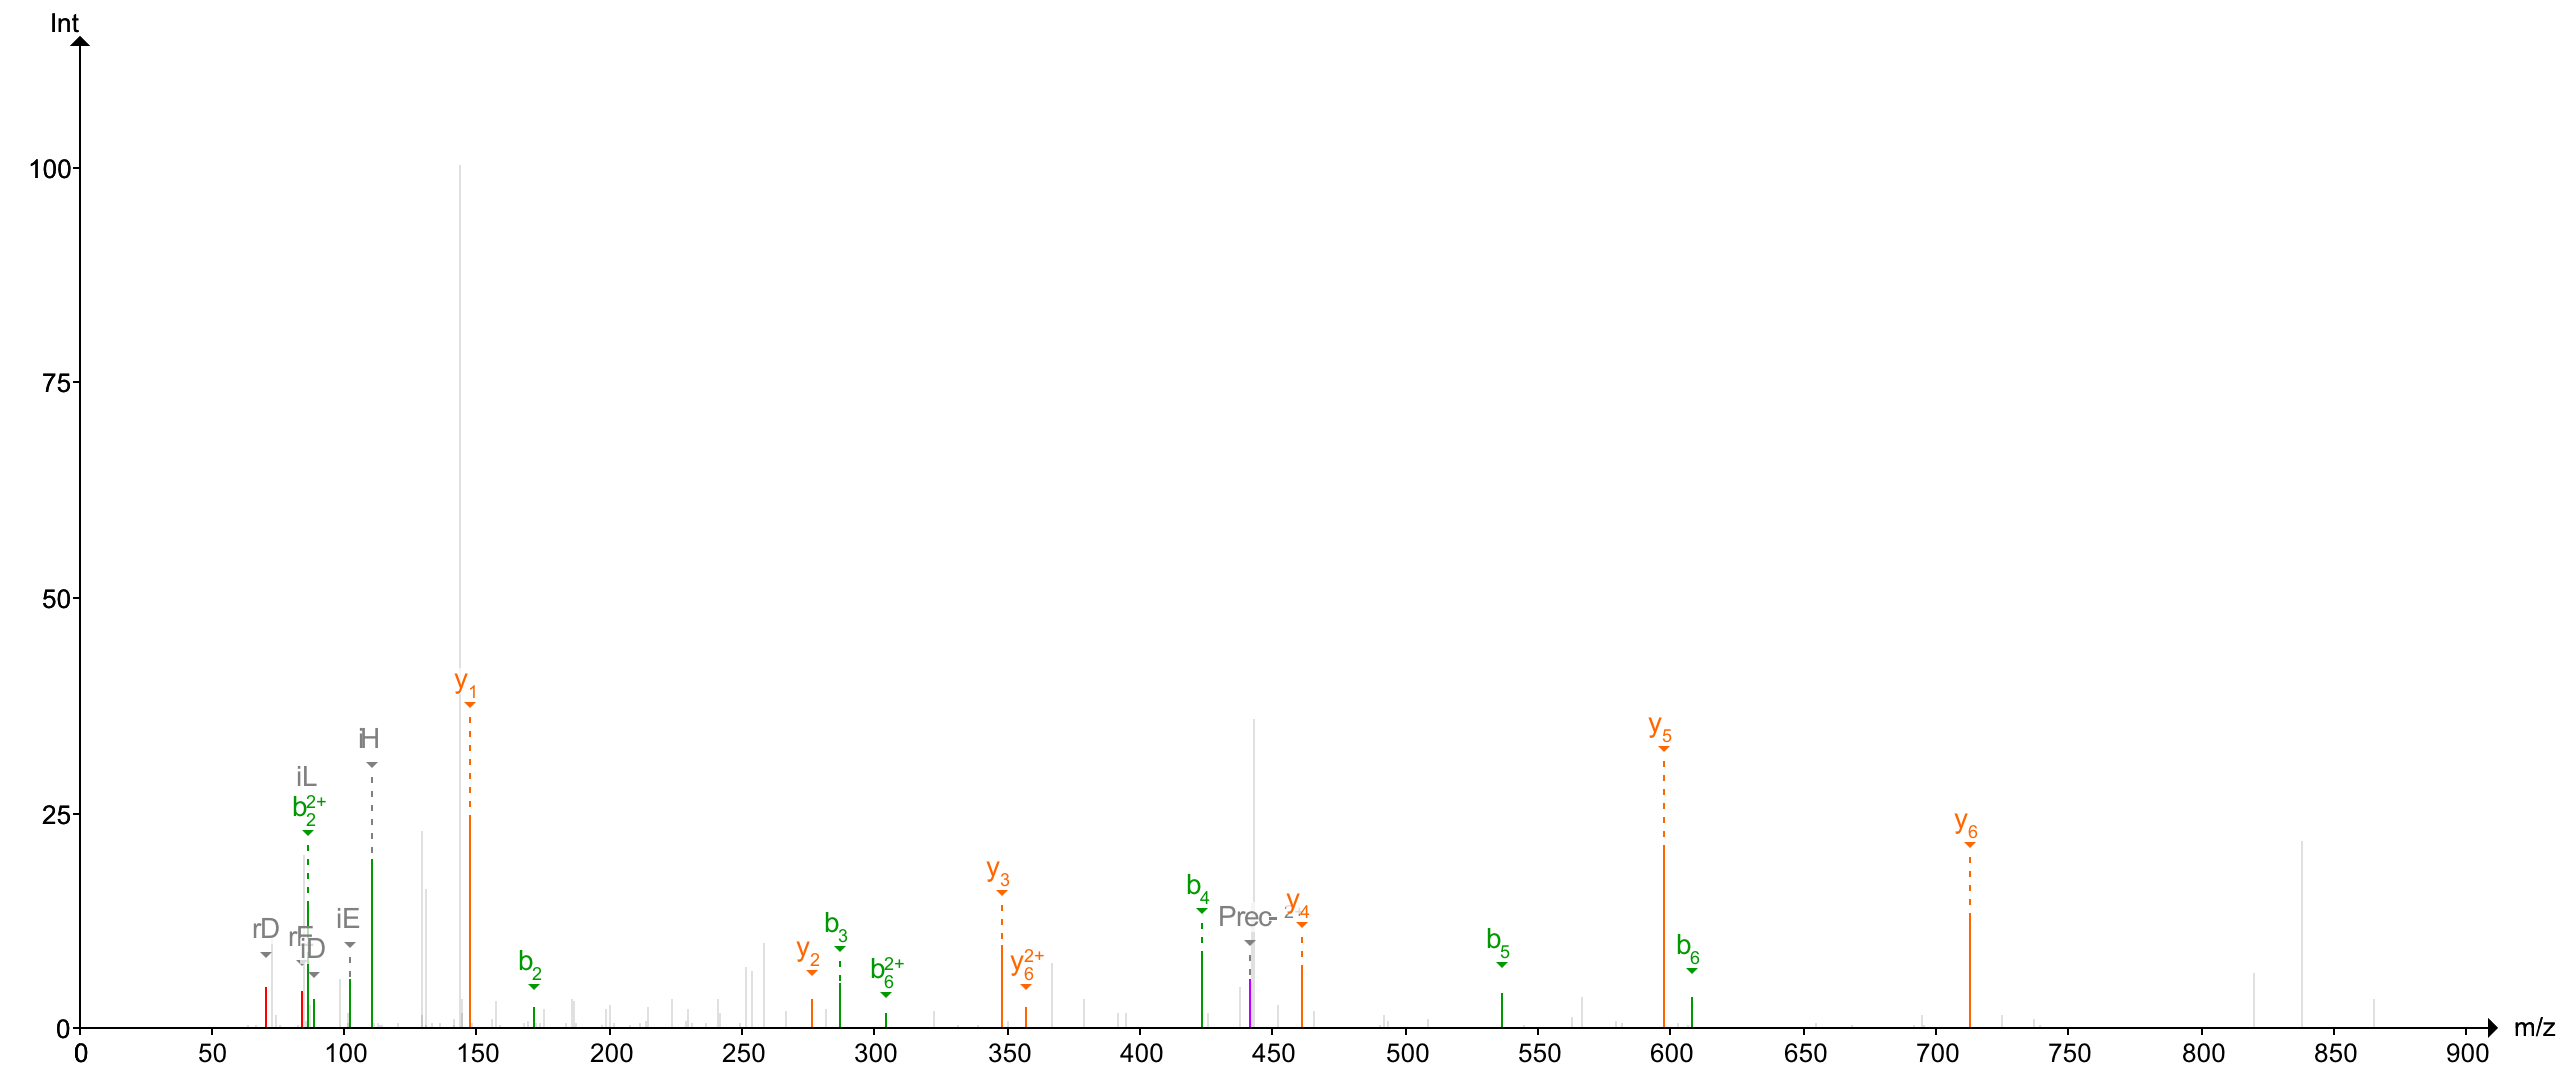

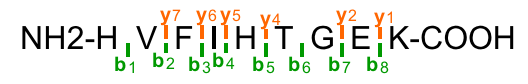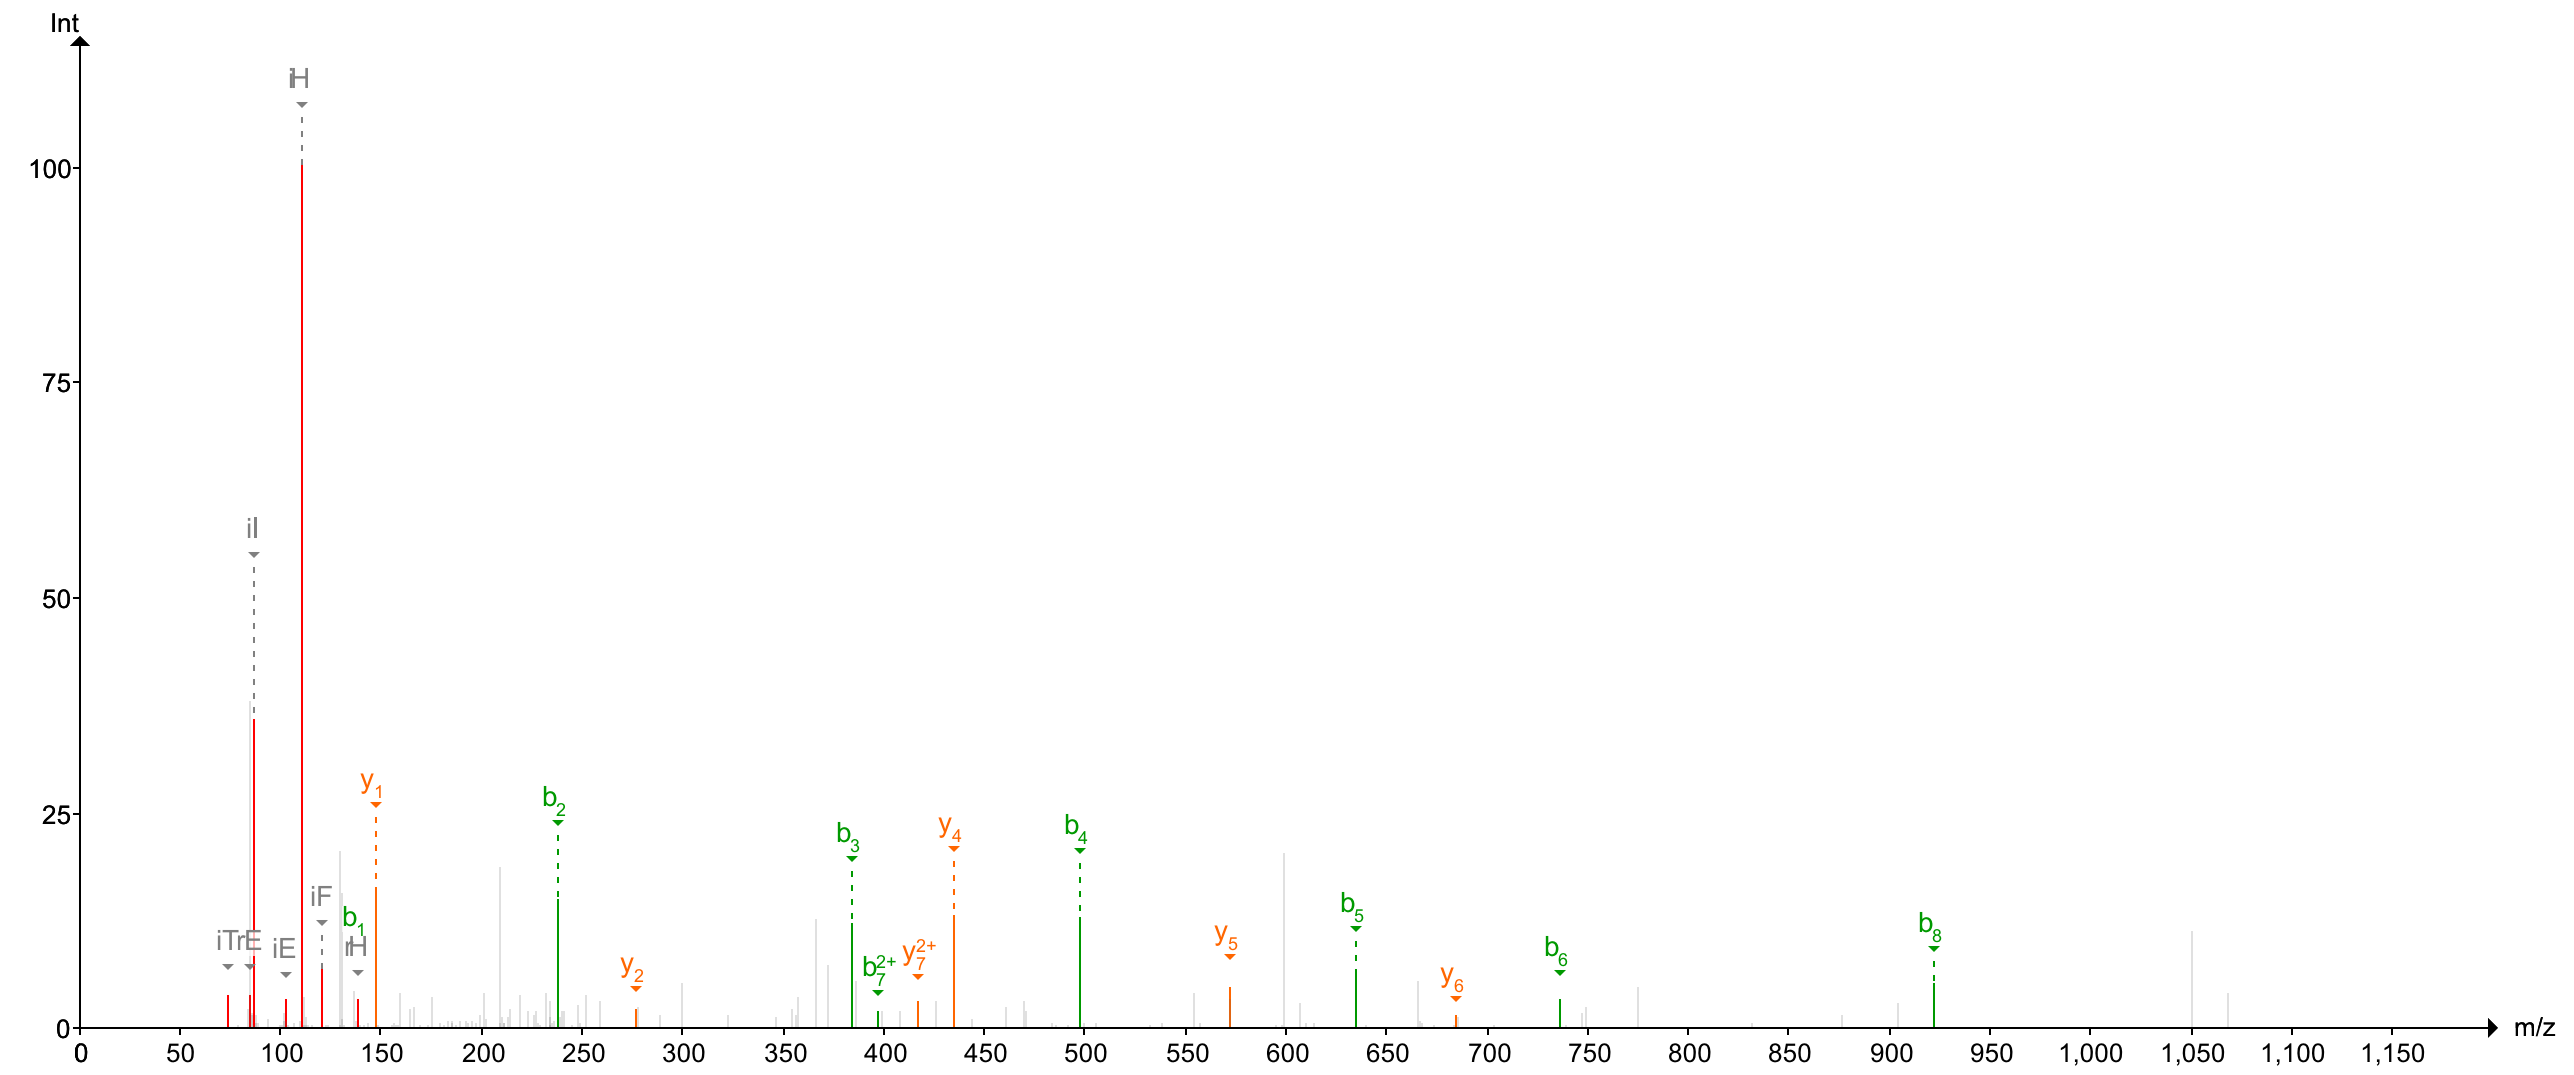

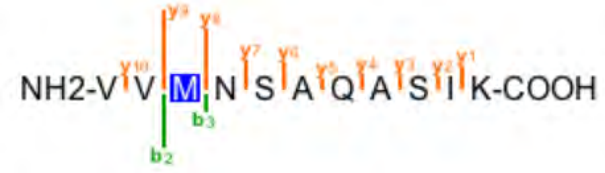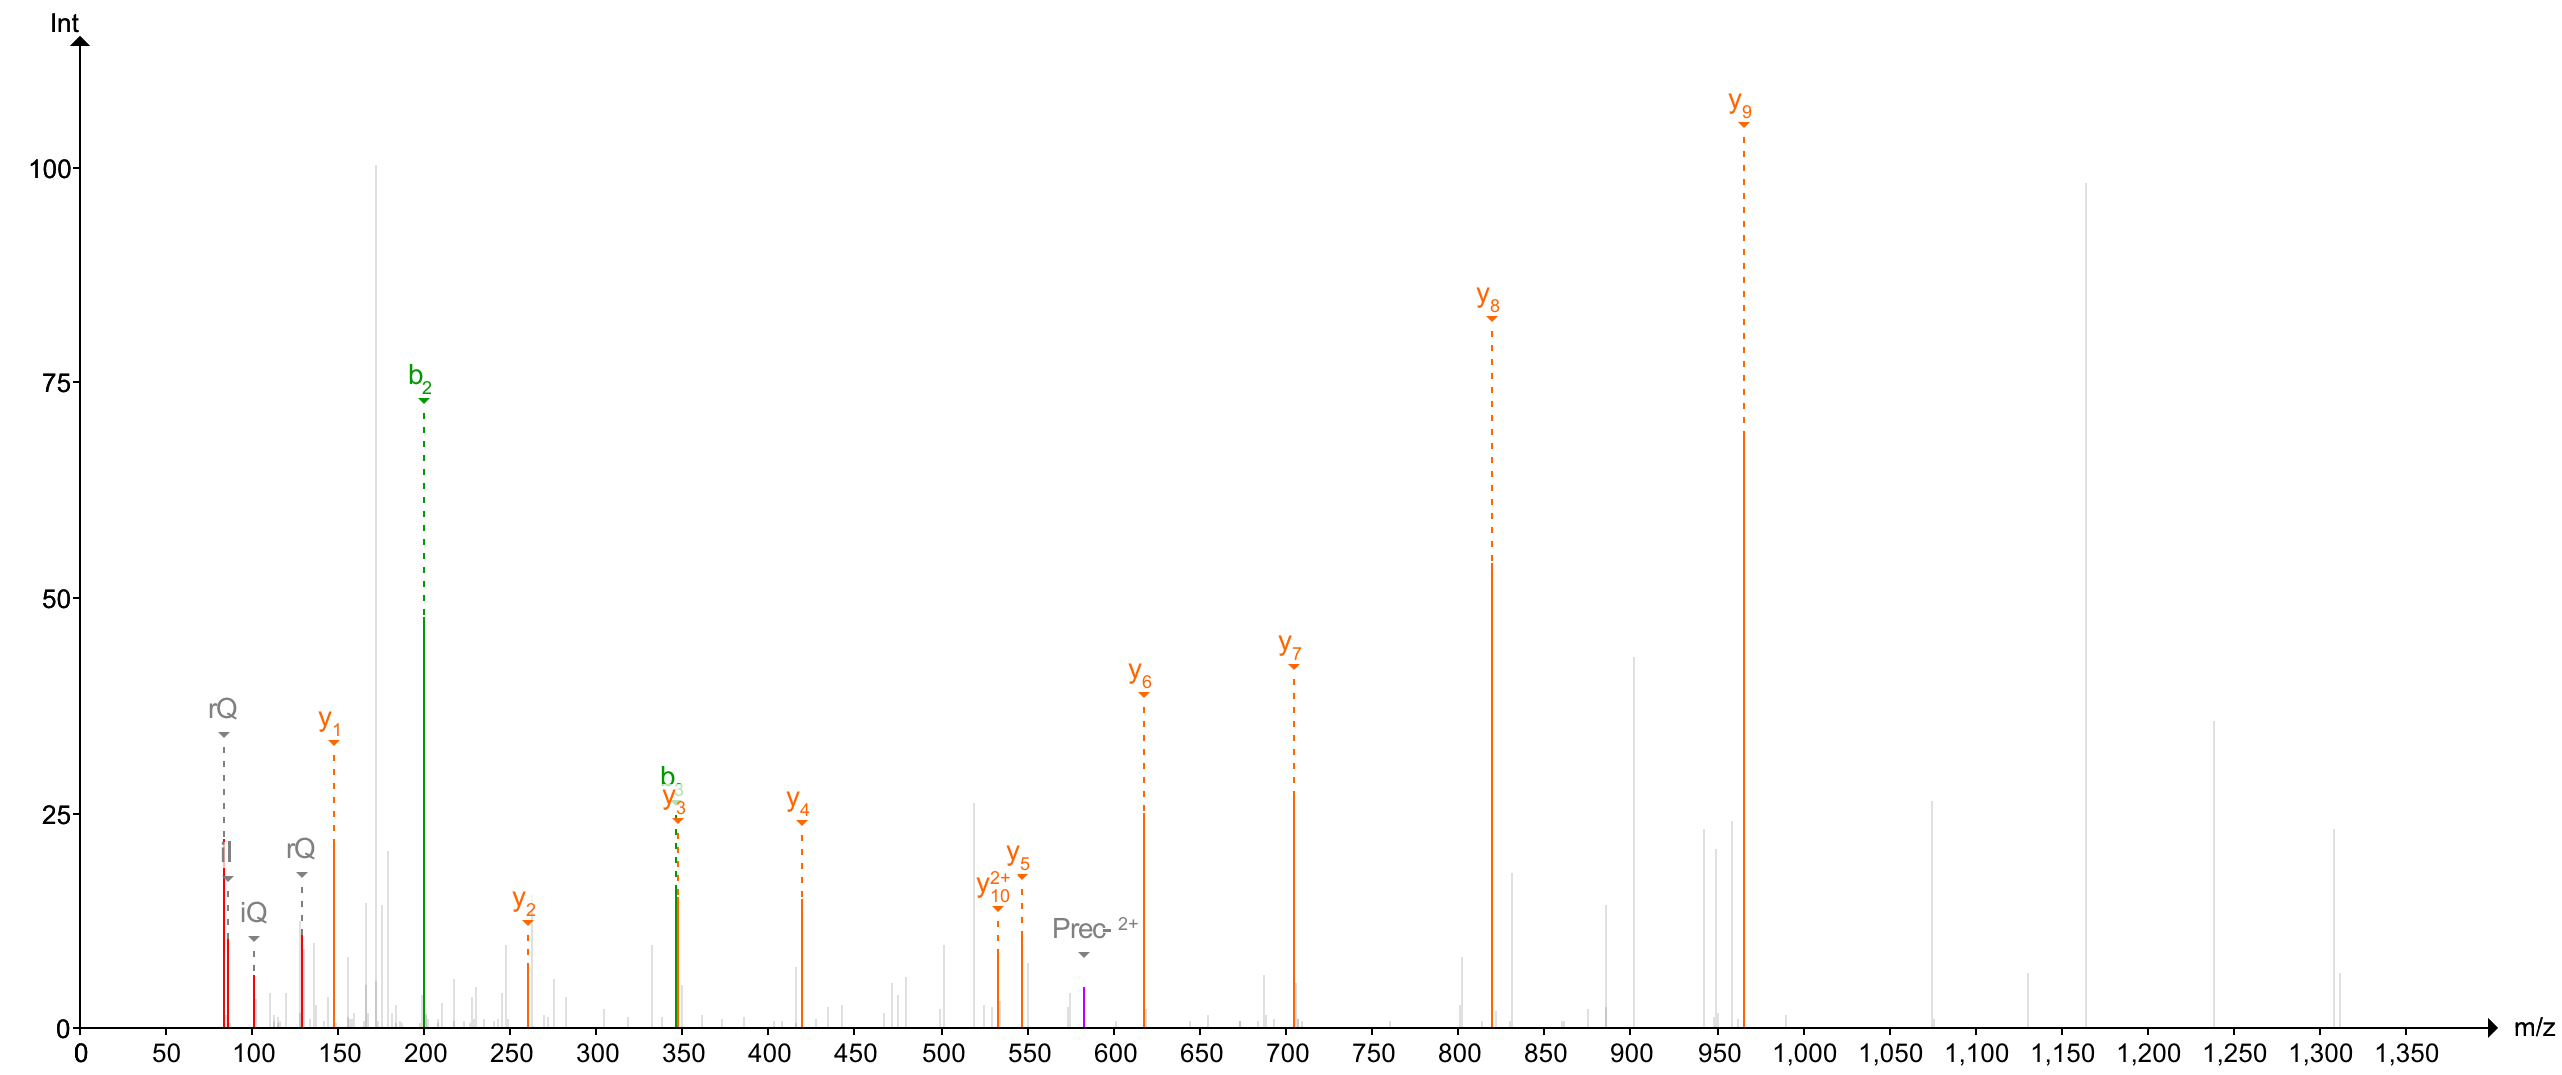

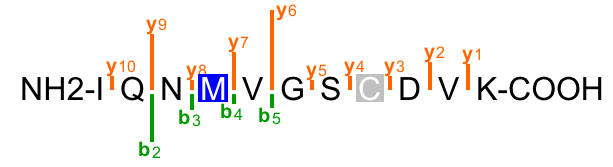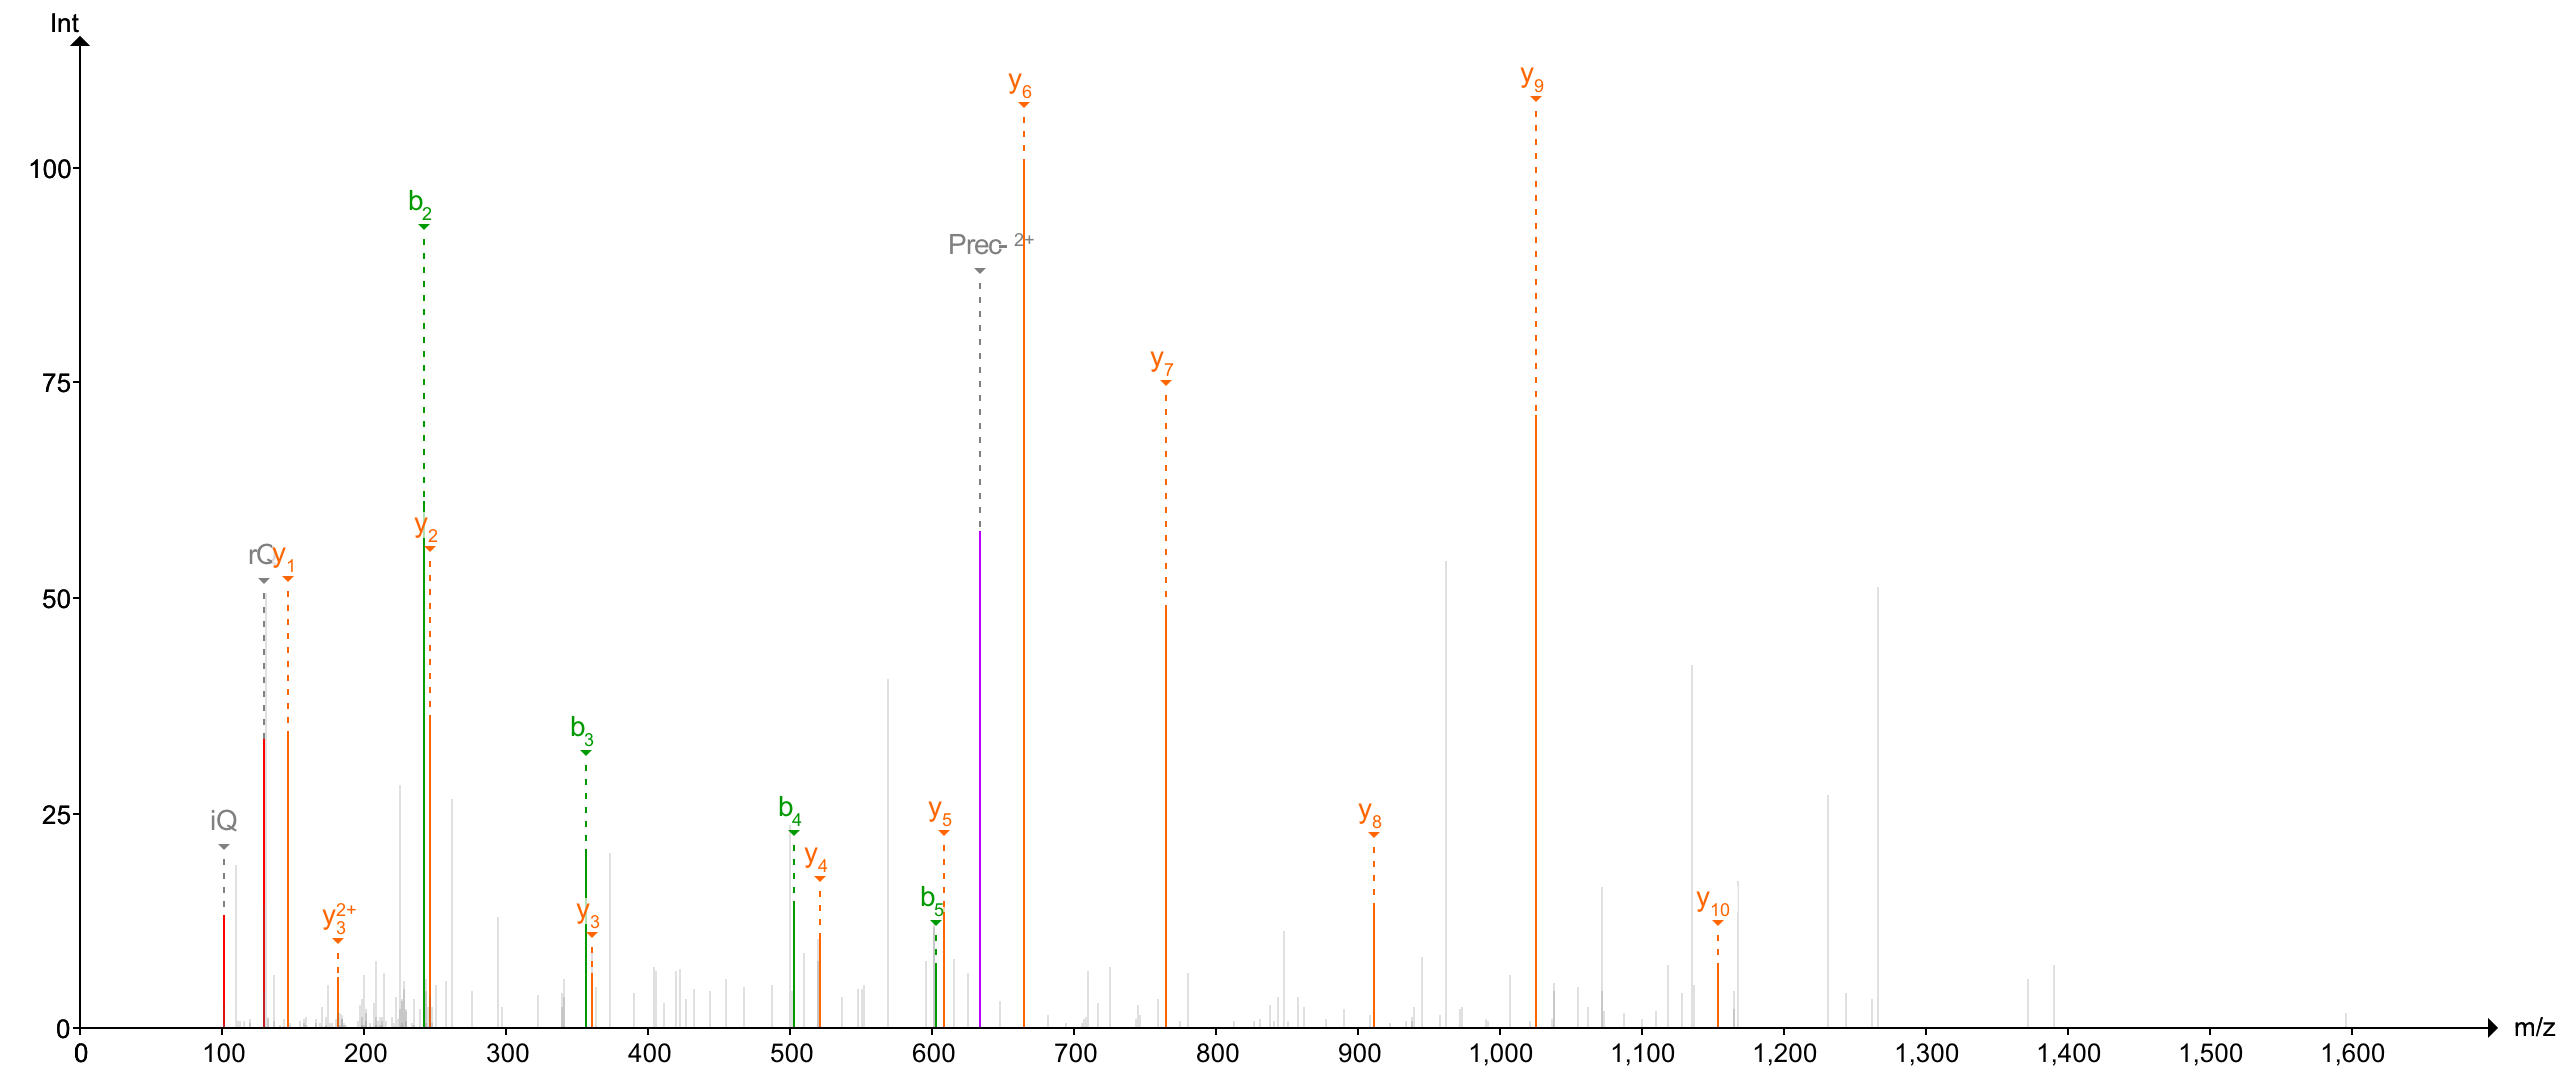

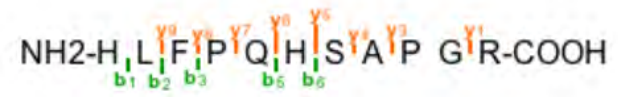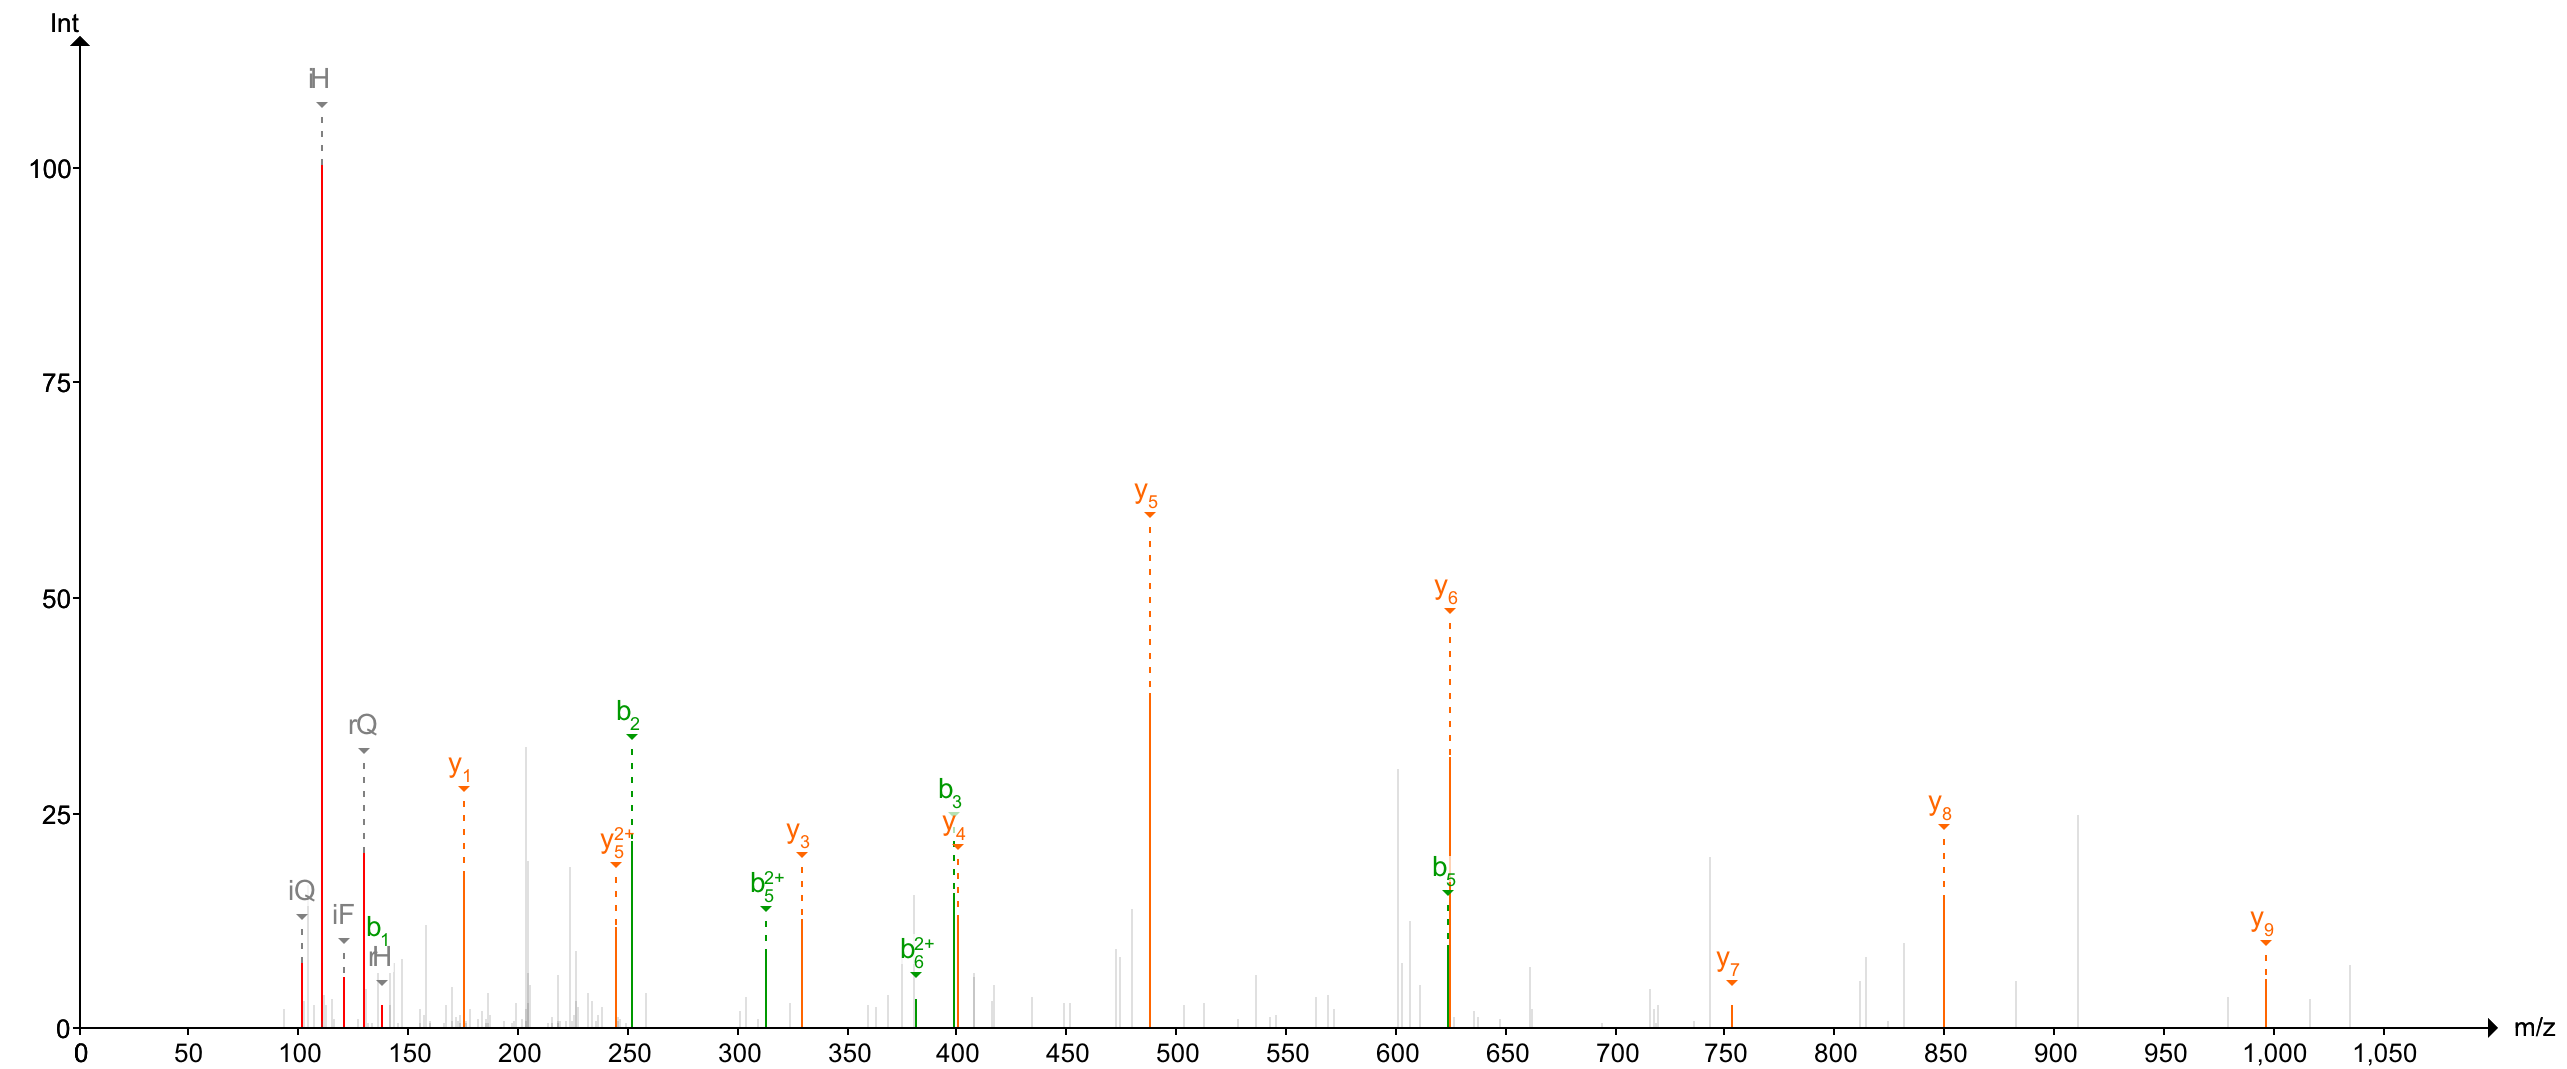



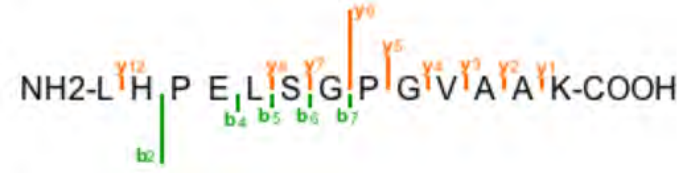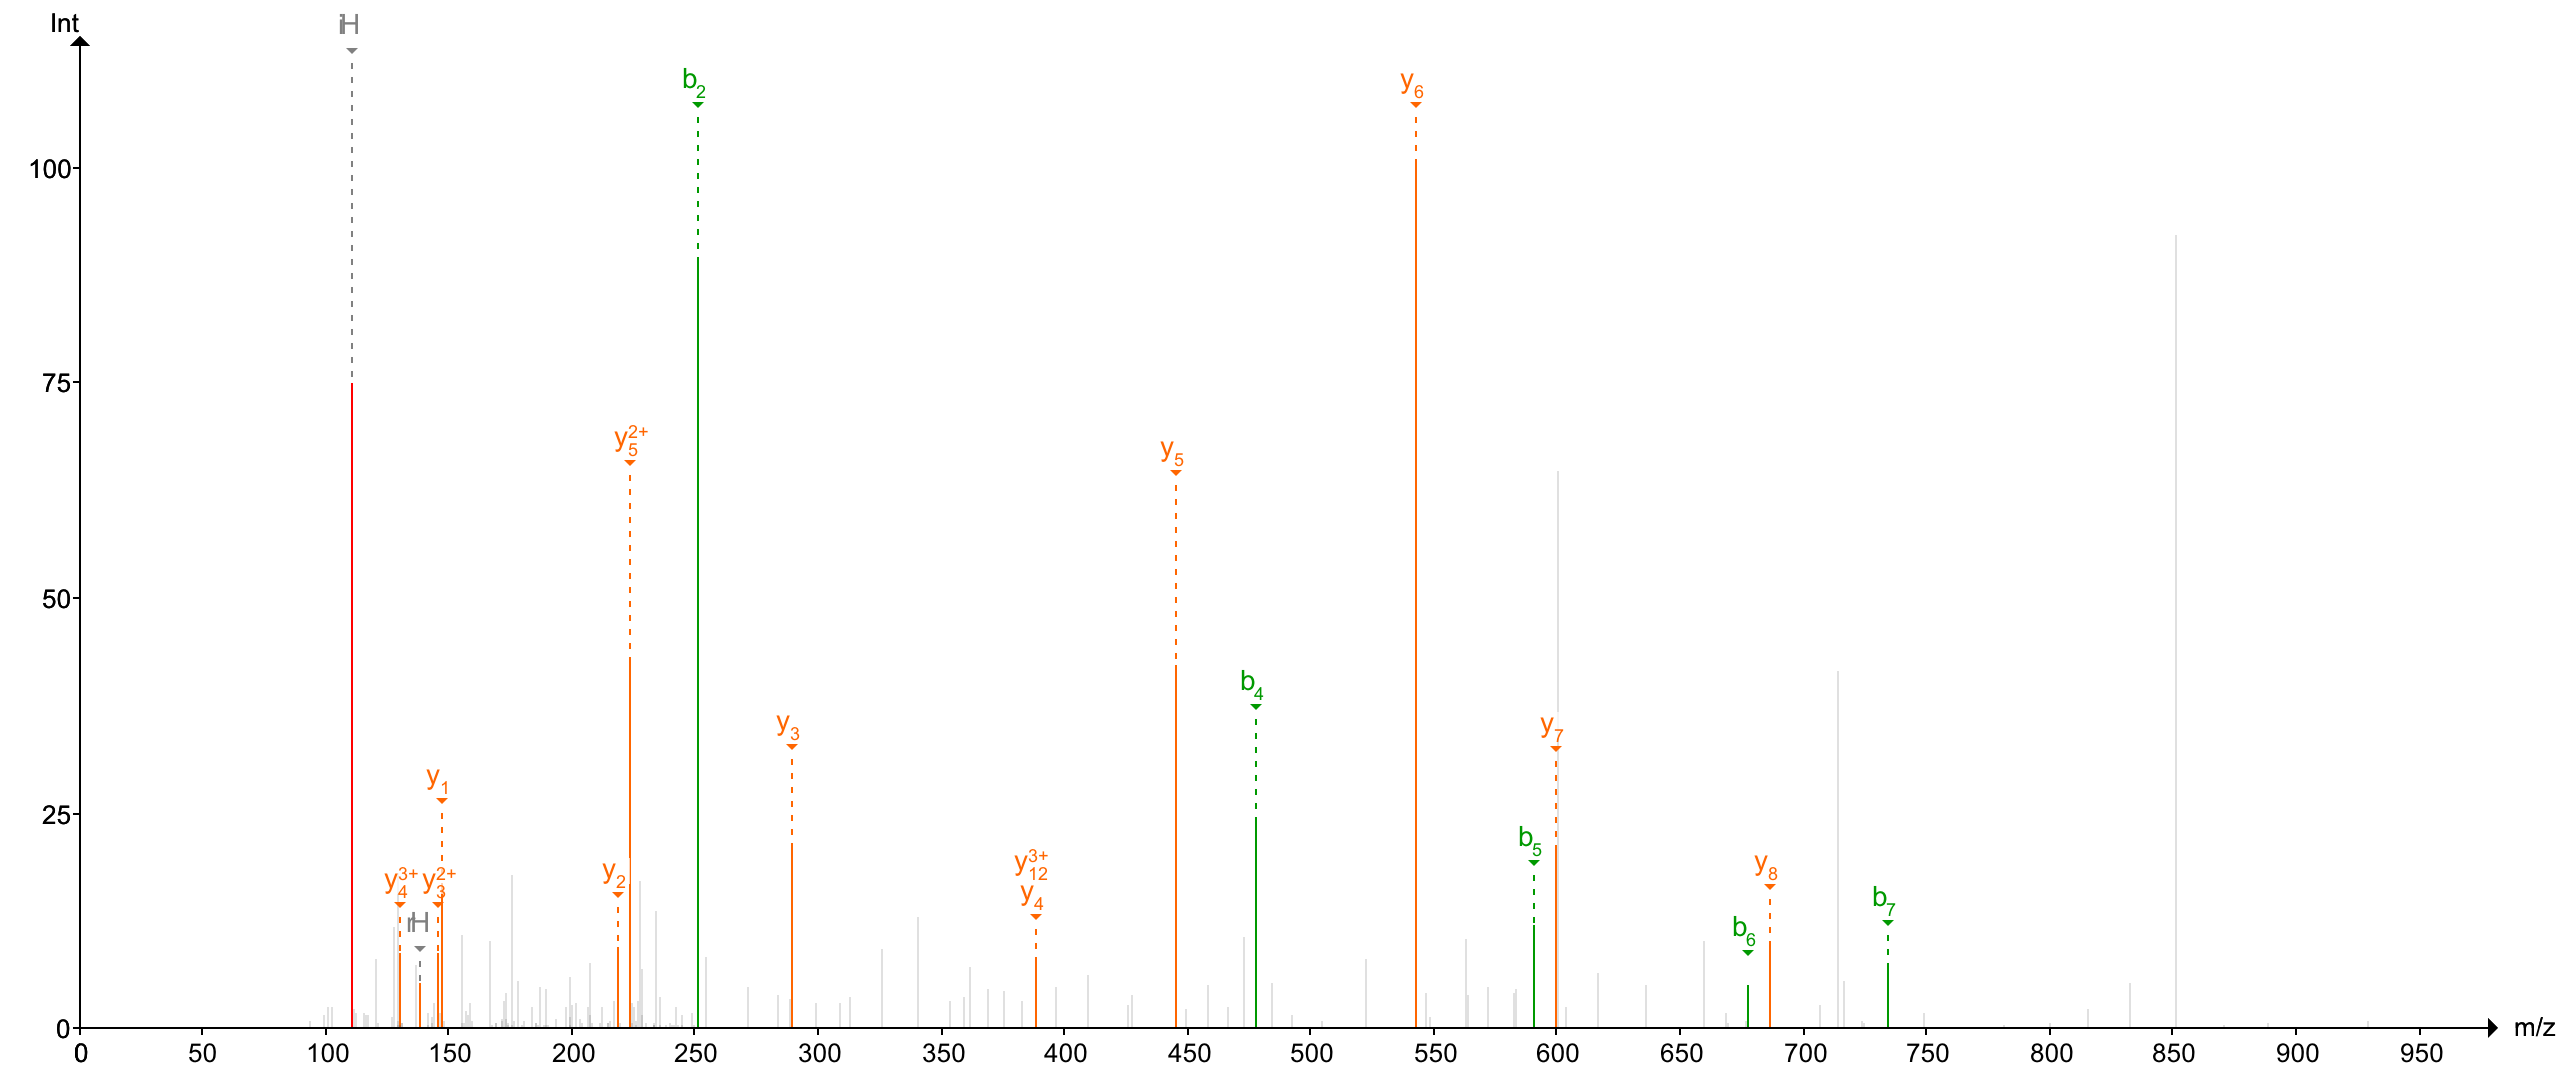

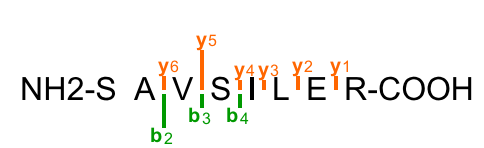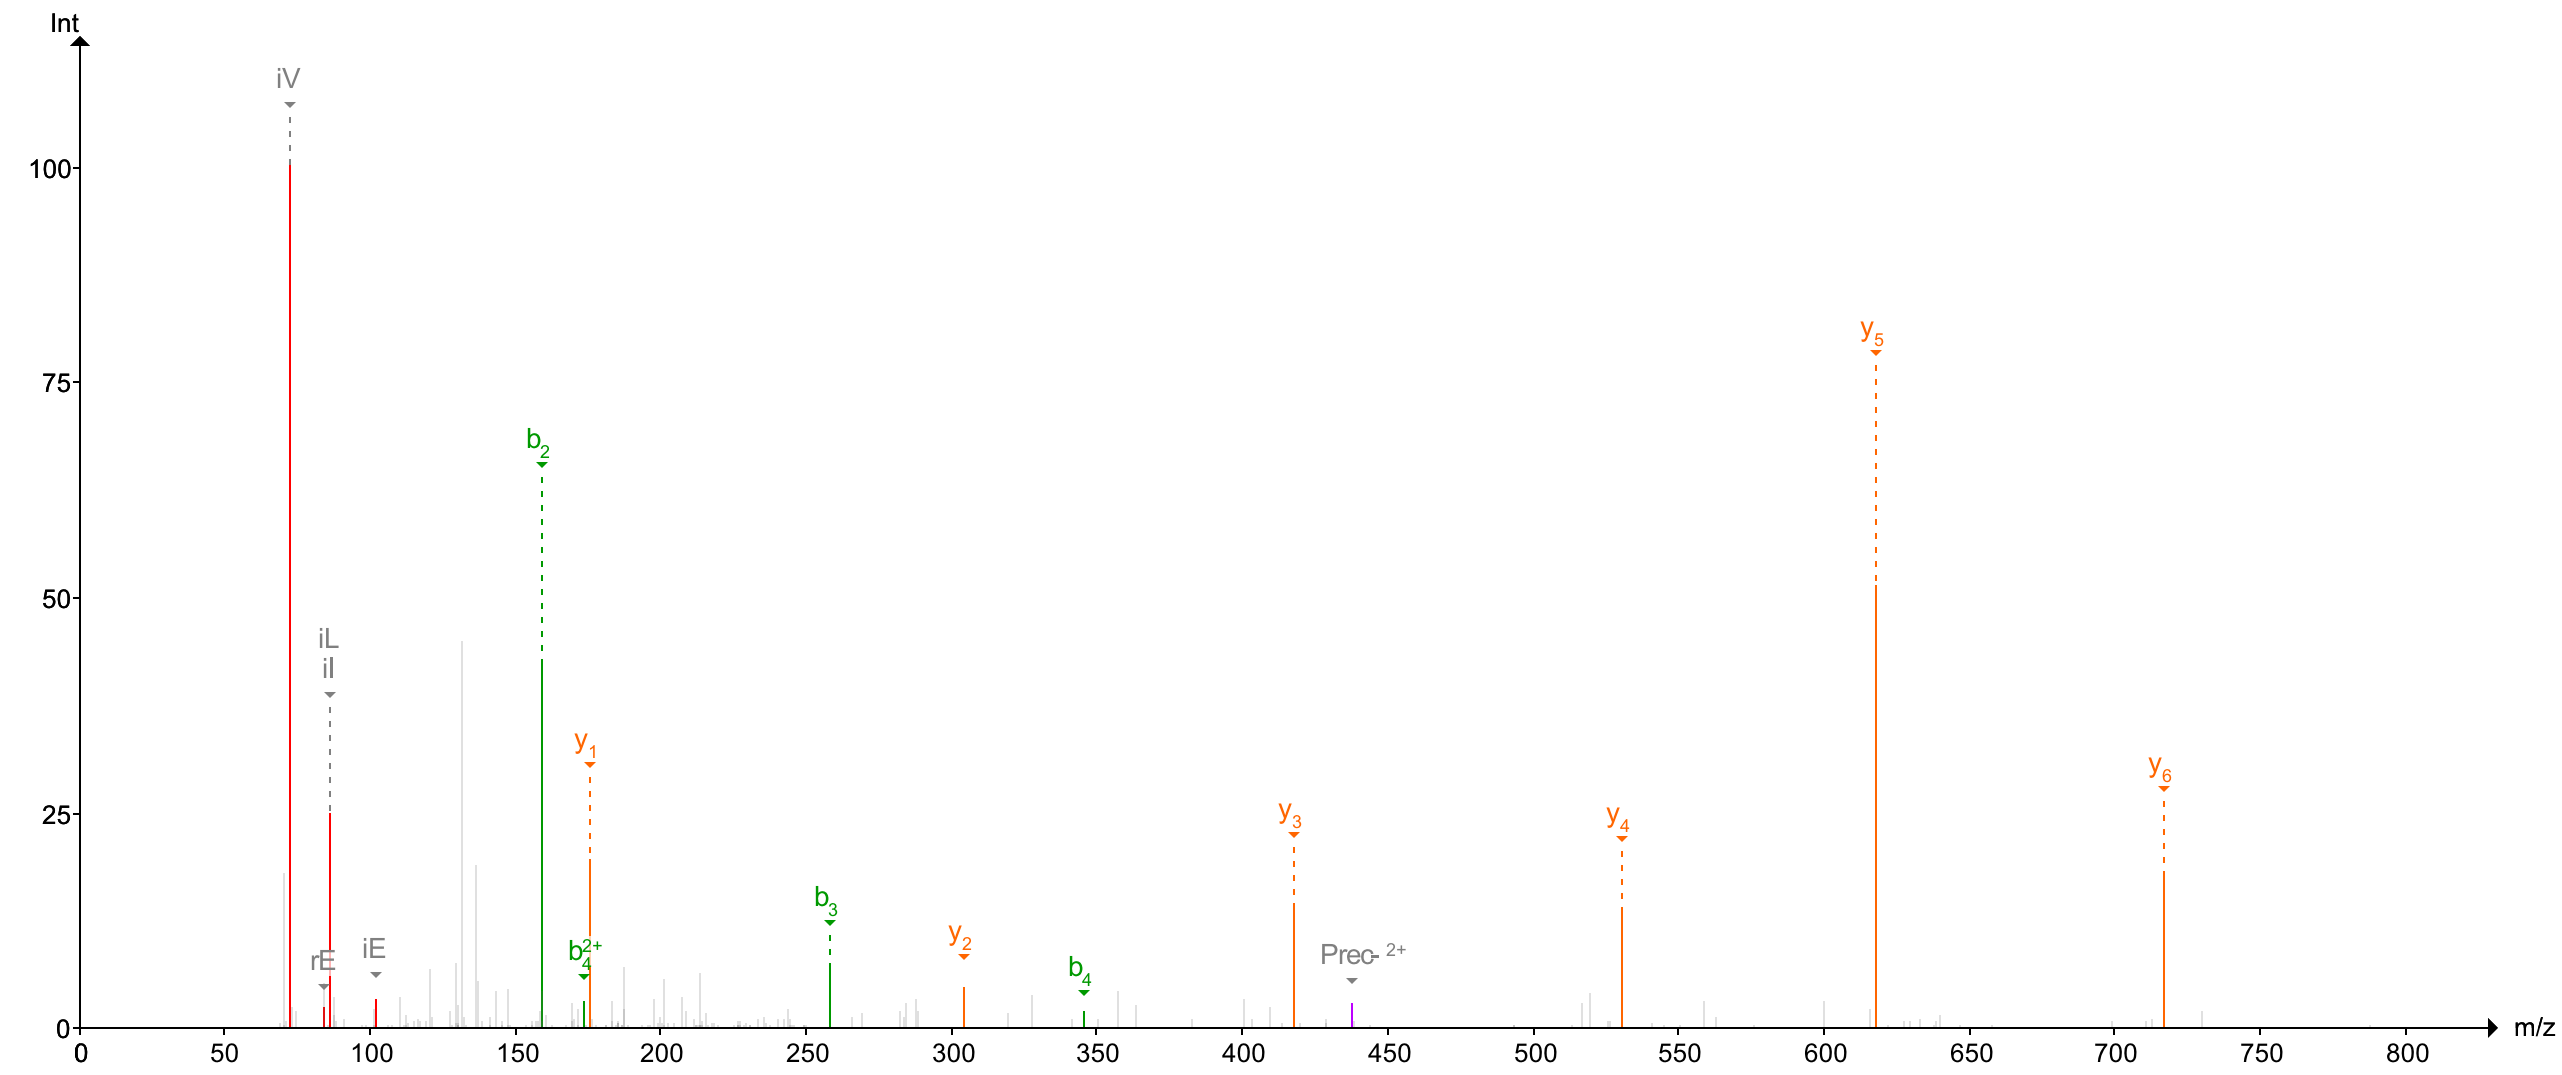

NH<sub>2</sub>-V L I G D V I I E V H G I K-COOH  
b<sub>2</sub> b<sub>4</sub> b<sub>5</sub> y<sub>1</sub> y<sub>2</sub> y<sub>3</sub> y<sub>4</sub> y<sub>5</sub> y<sub>6</sub> y<sub>7</sub> y<sub>8</sub> y<sub>9</sub>

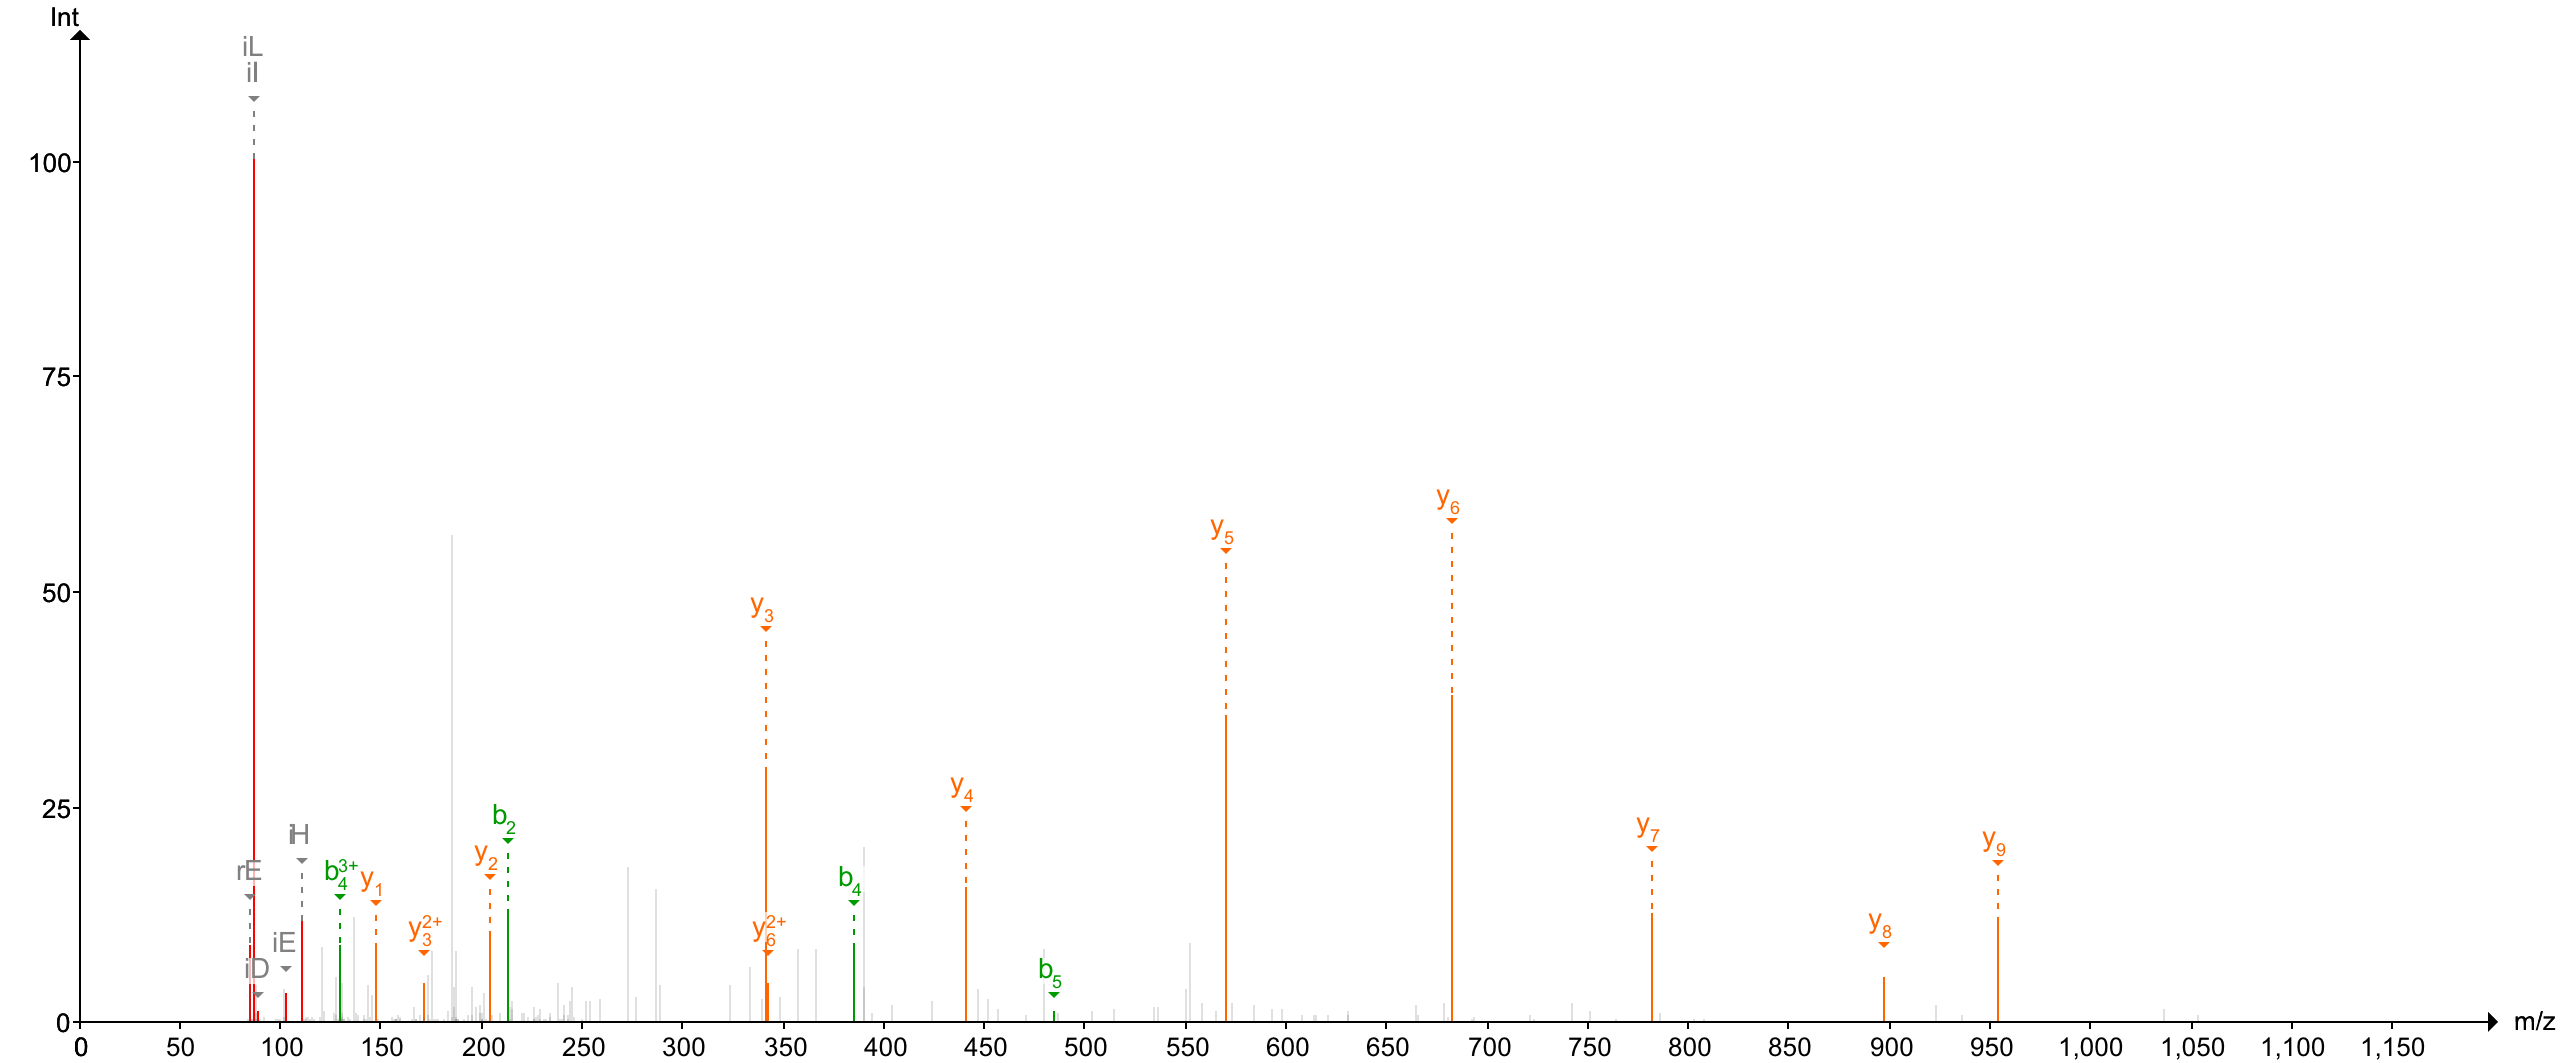

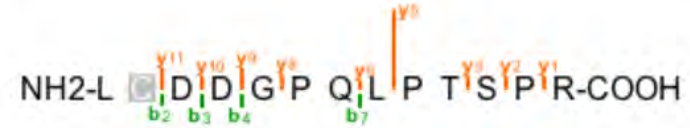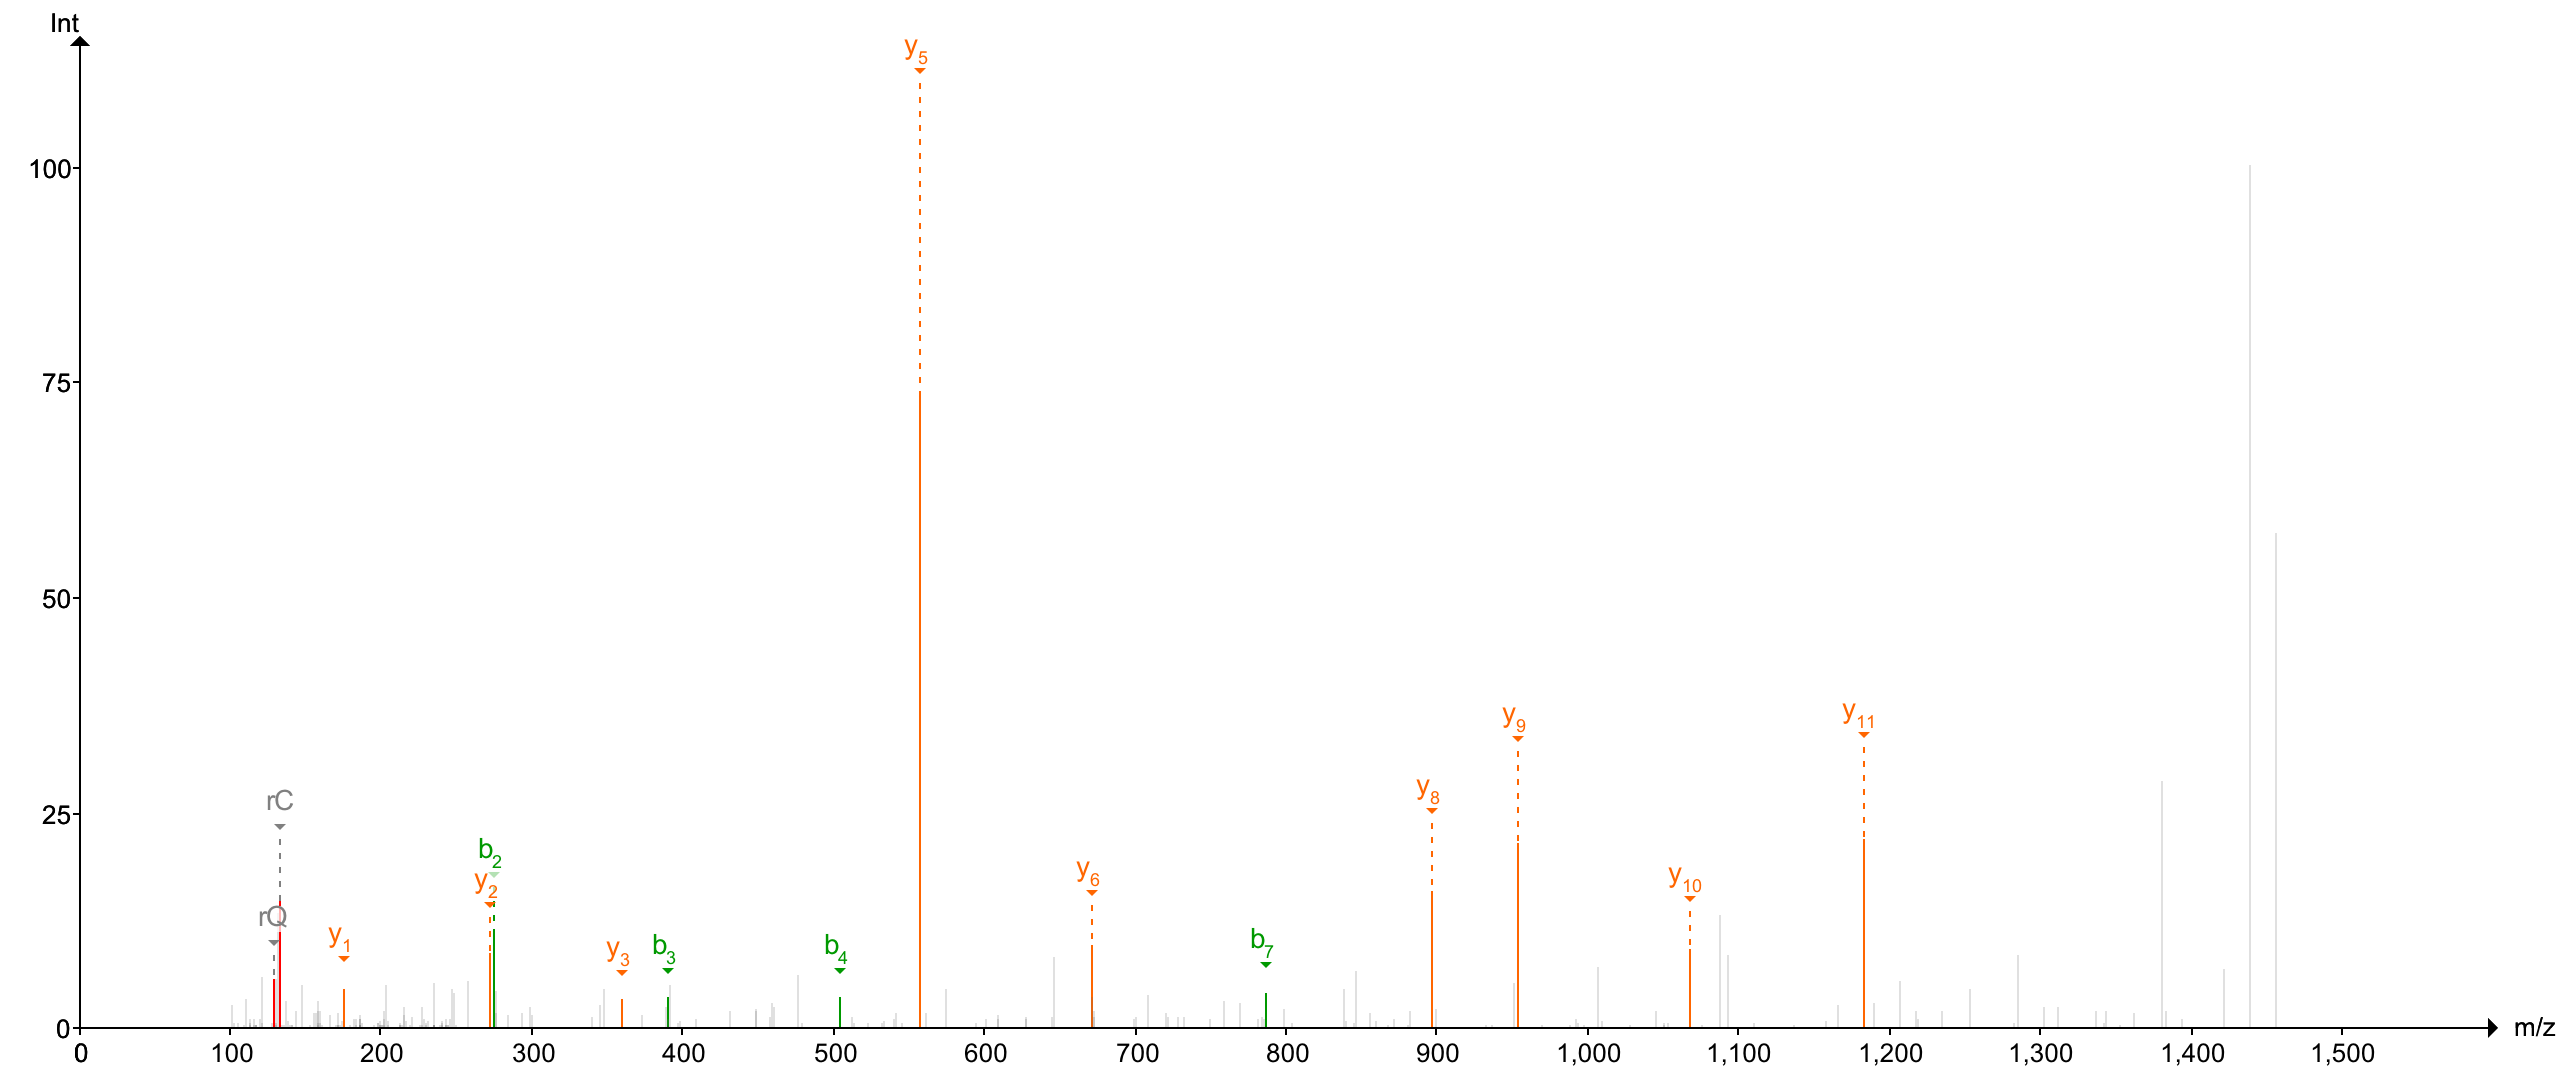

NH<sub>2</sub>-A R P P G P P D L L G A F R-COOH

Y<sub>11</sub> b<sub>2</sub> Y<sub>8</sub> Y<sub>7</sub> Y<sub>6</sub> Y<sub>5</sub> Y<sub>4</sub> Y<sub>3</sub> Y<sub>1</sub>

b<sub>5</sub> b<sub>6</sub> b<sub>7</sub> b<sub>8</sub> b<sub>9</sub>

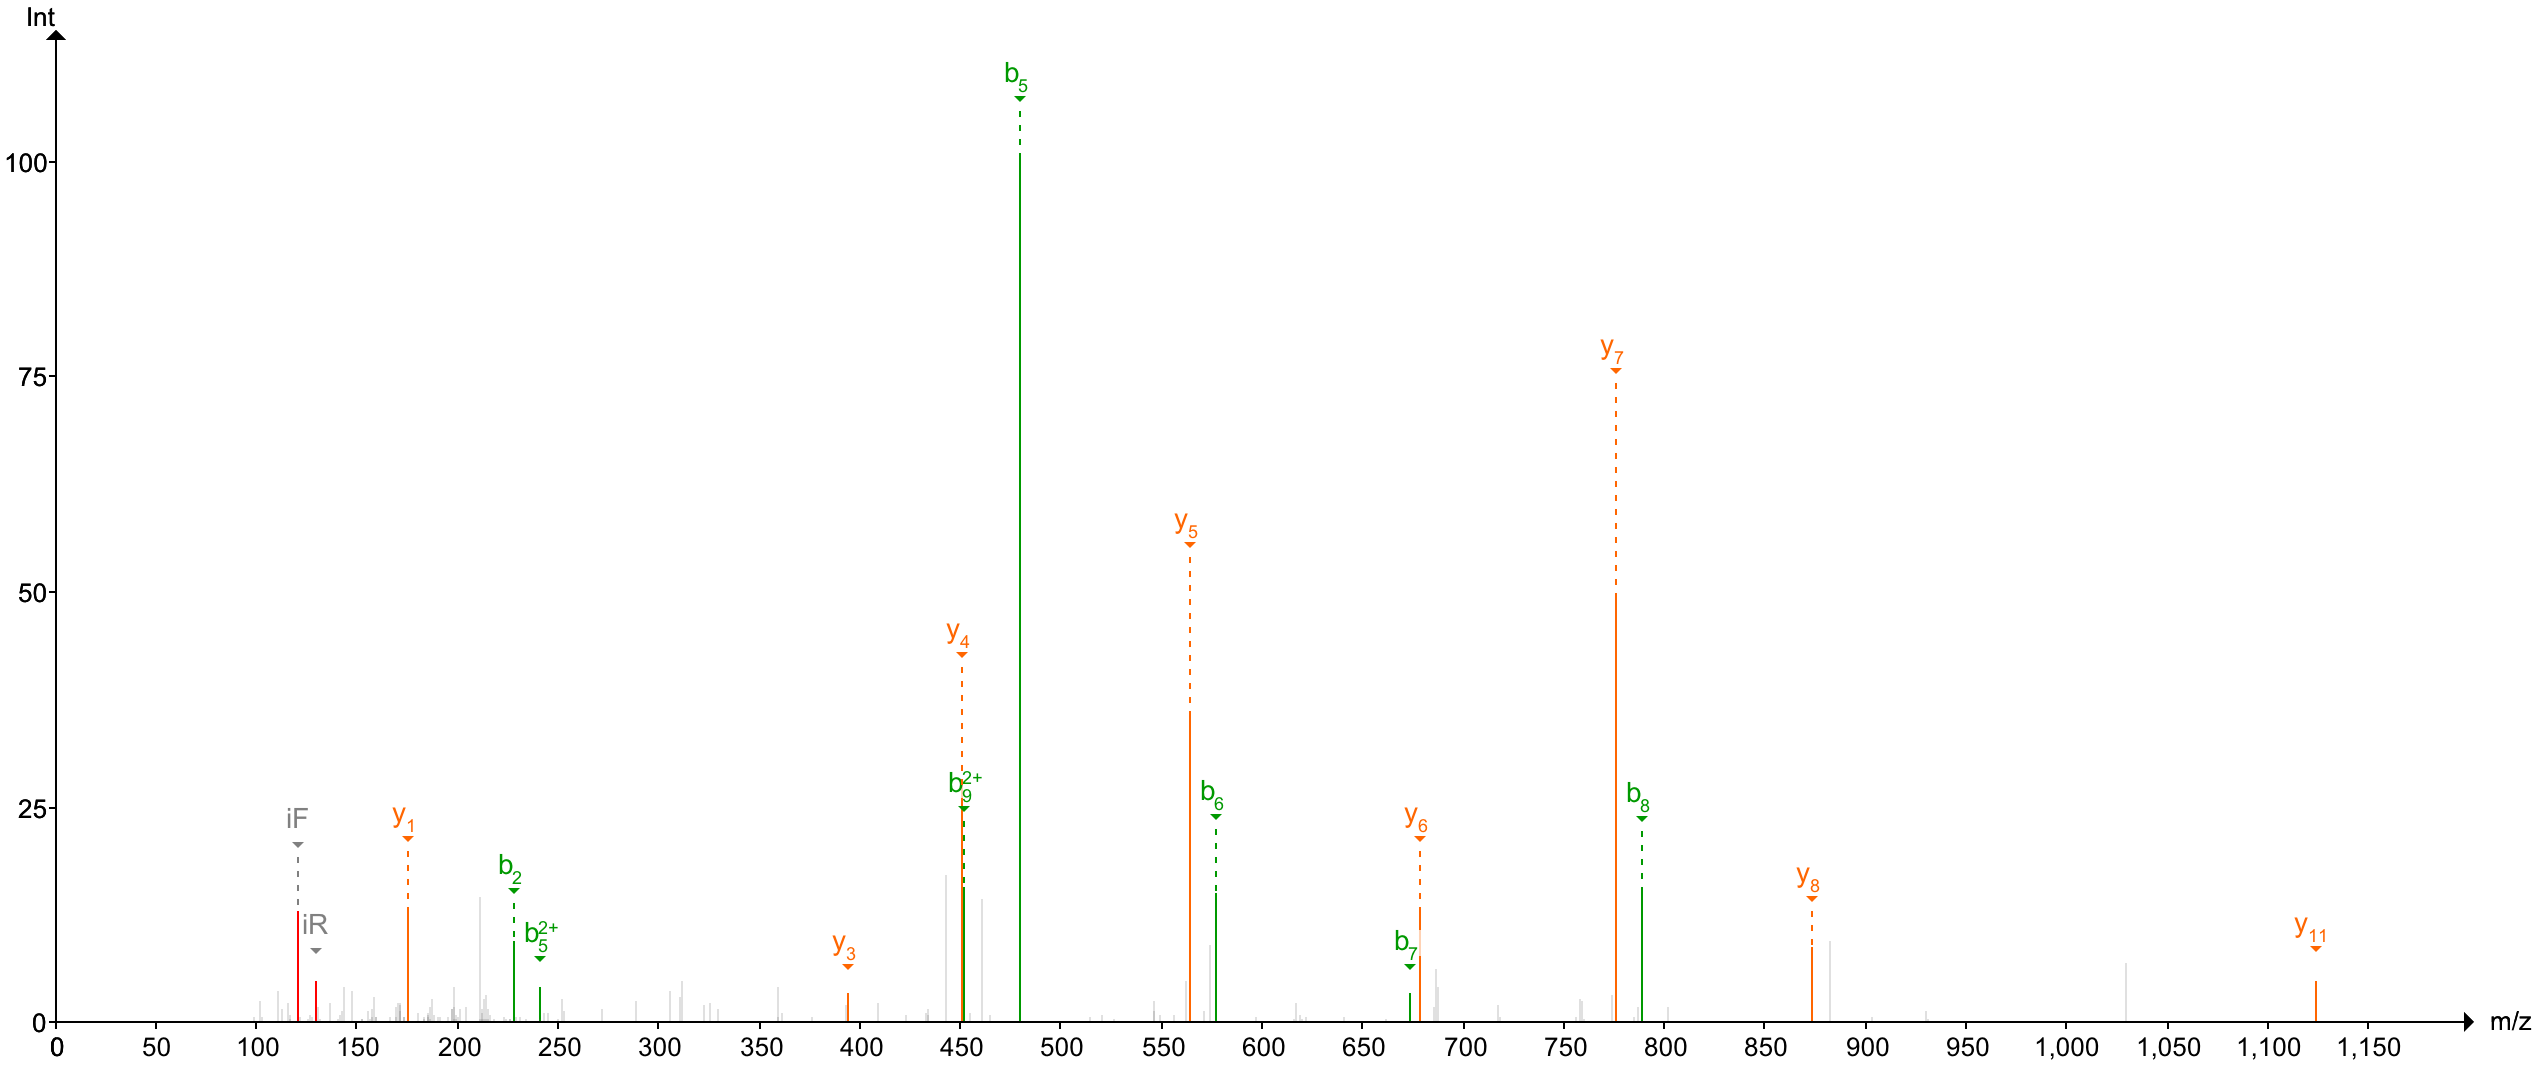

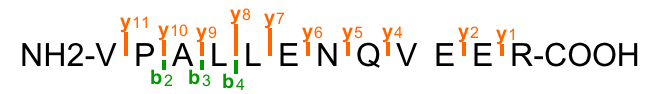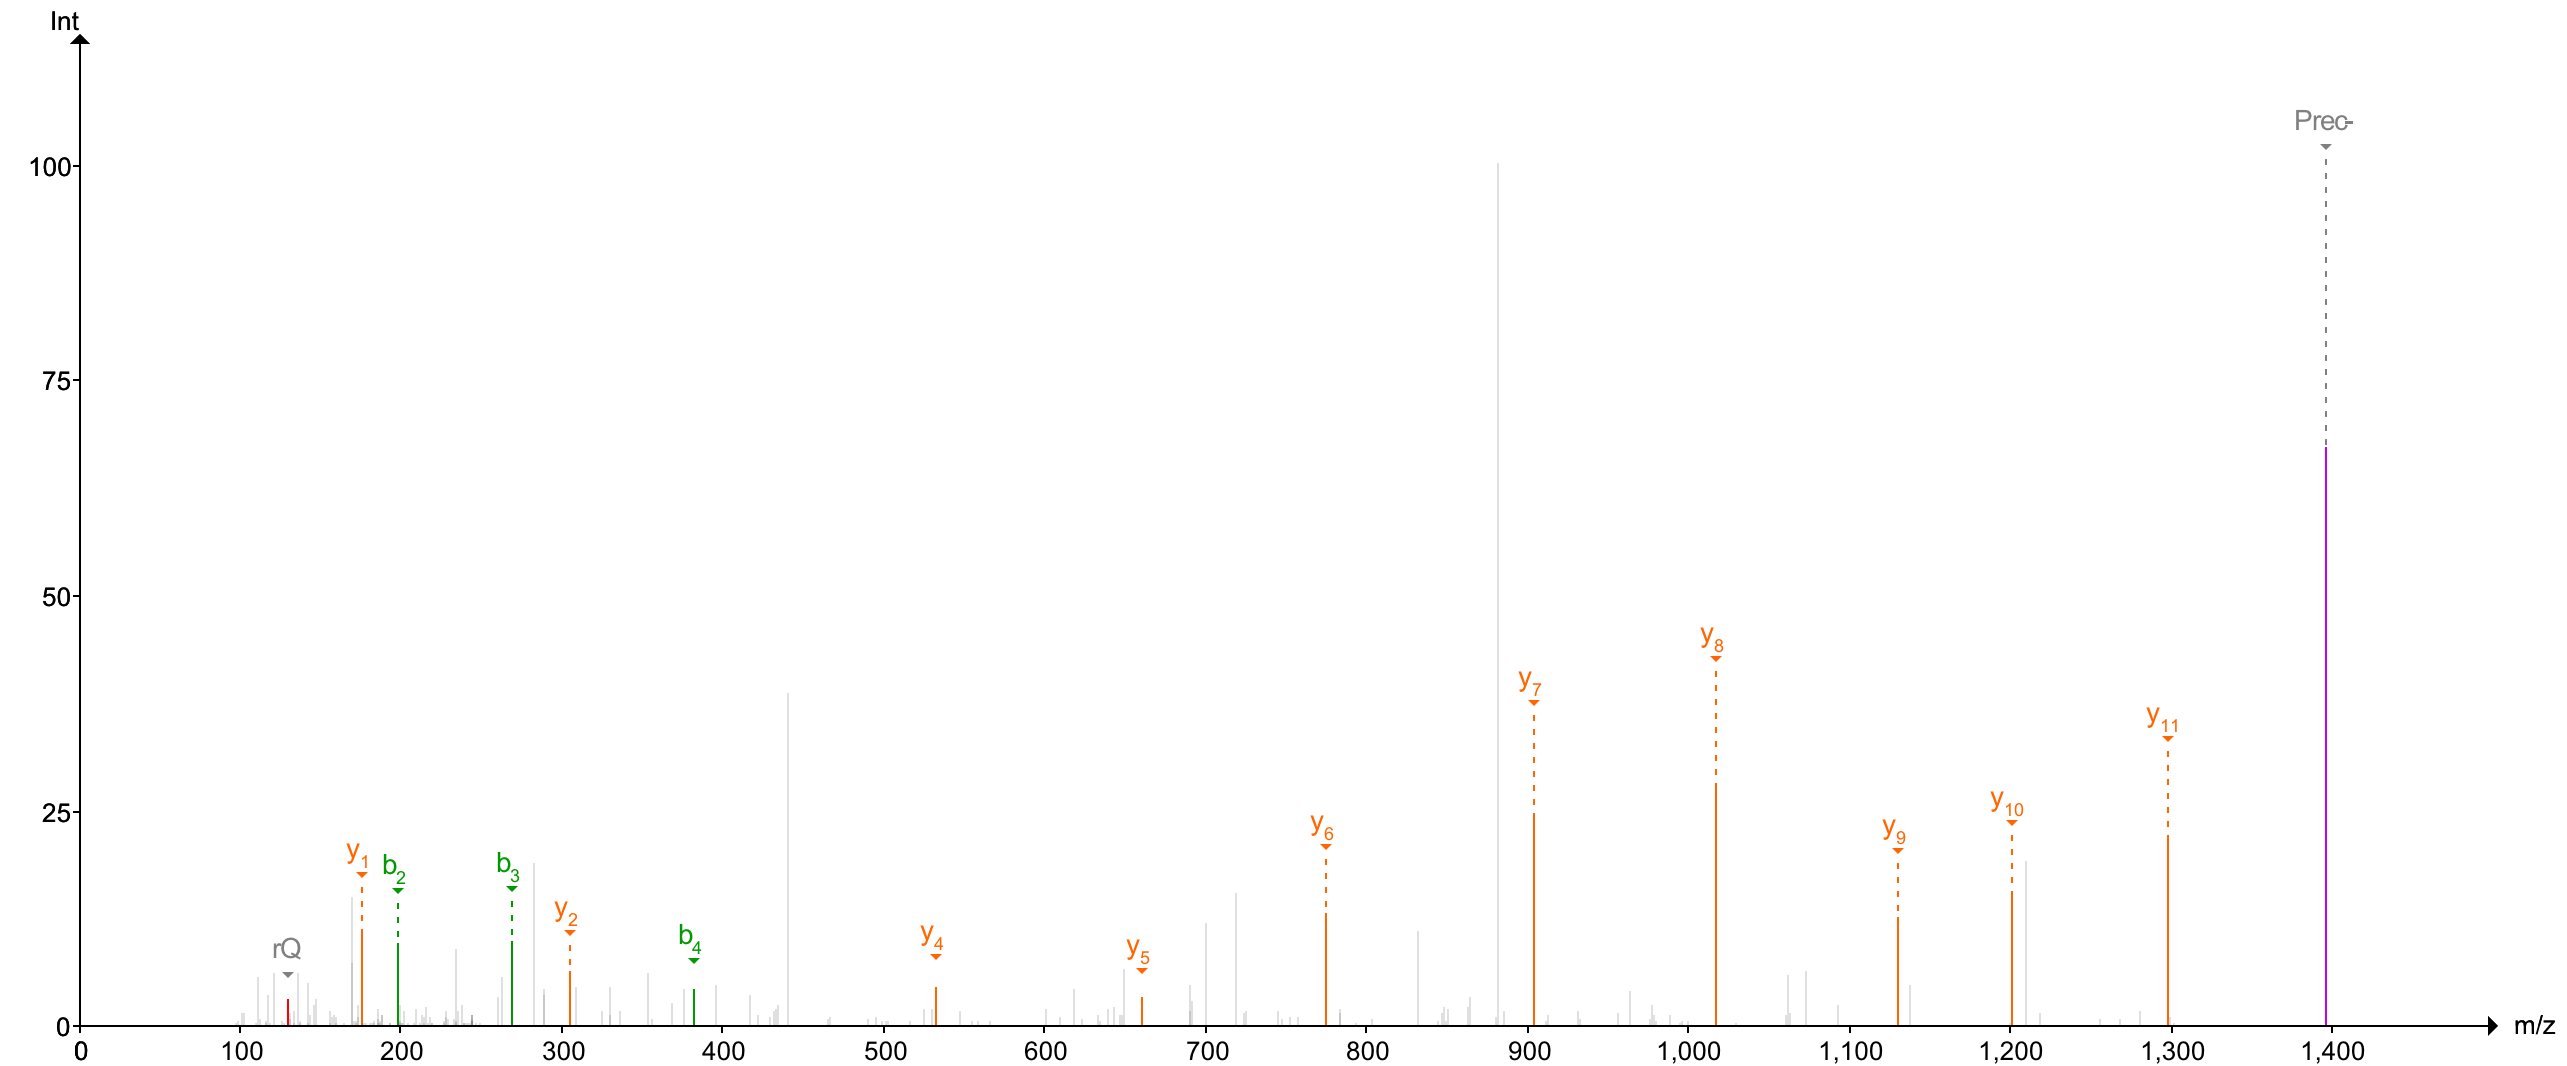

NH<sub>2</sub>-L<sup>y7</sup>E<sup>y6</sup>I<sup>y5</sup>V<sup>y4</sup>E<sup>y3</sup>L<sup>y2</sup>A<sup>y1</sup>L<sup>iL</sup>K-COOH  
b<sub>2</sub> b<sub>3</sub>

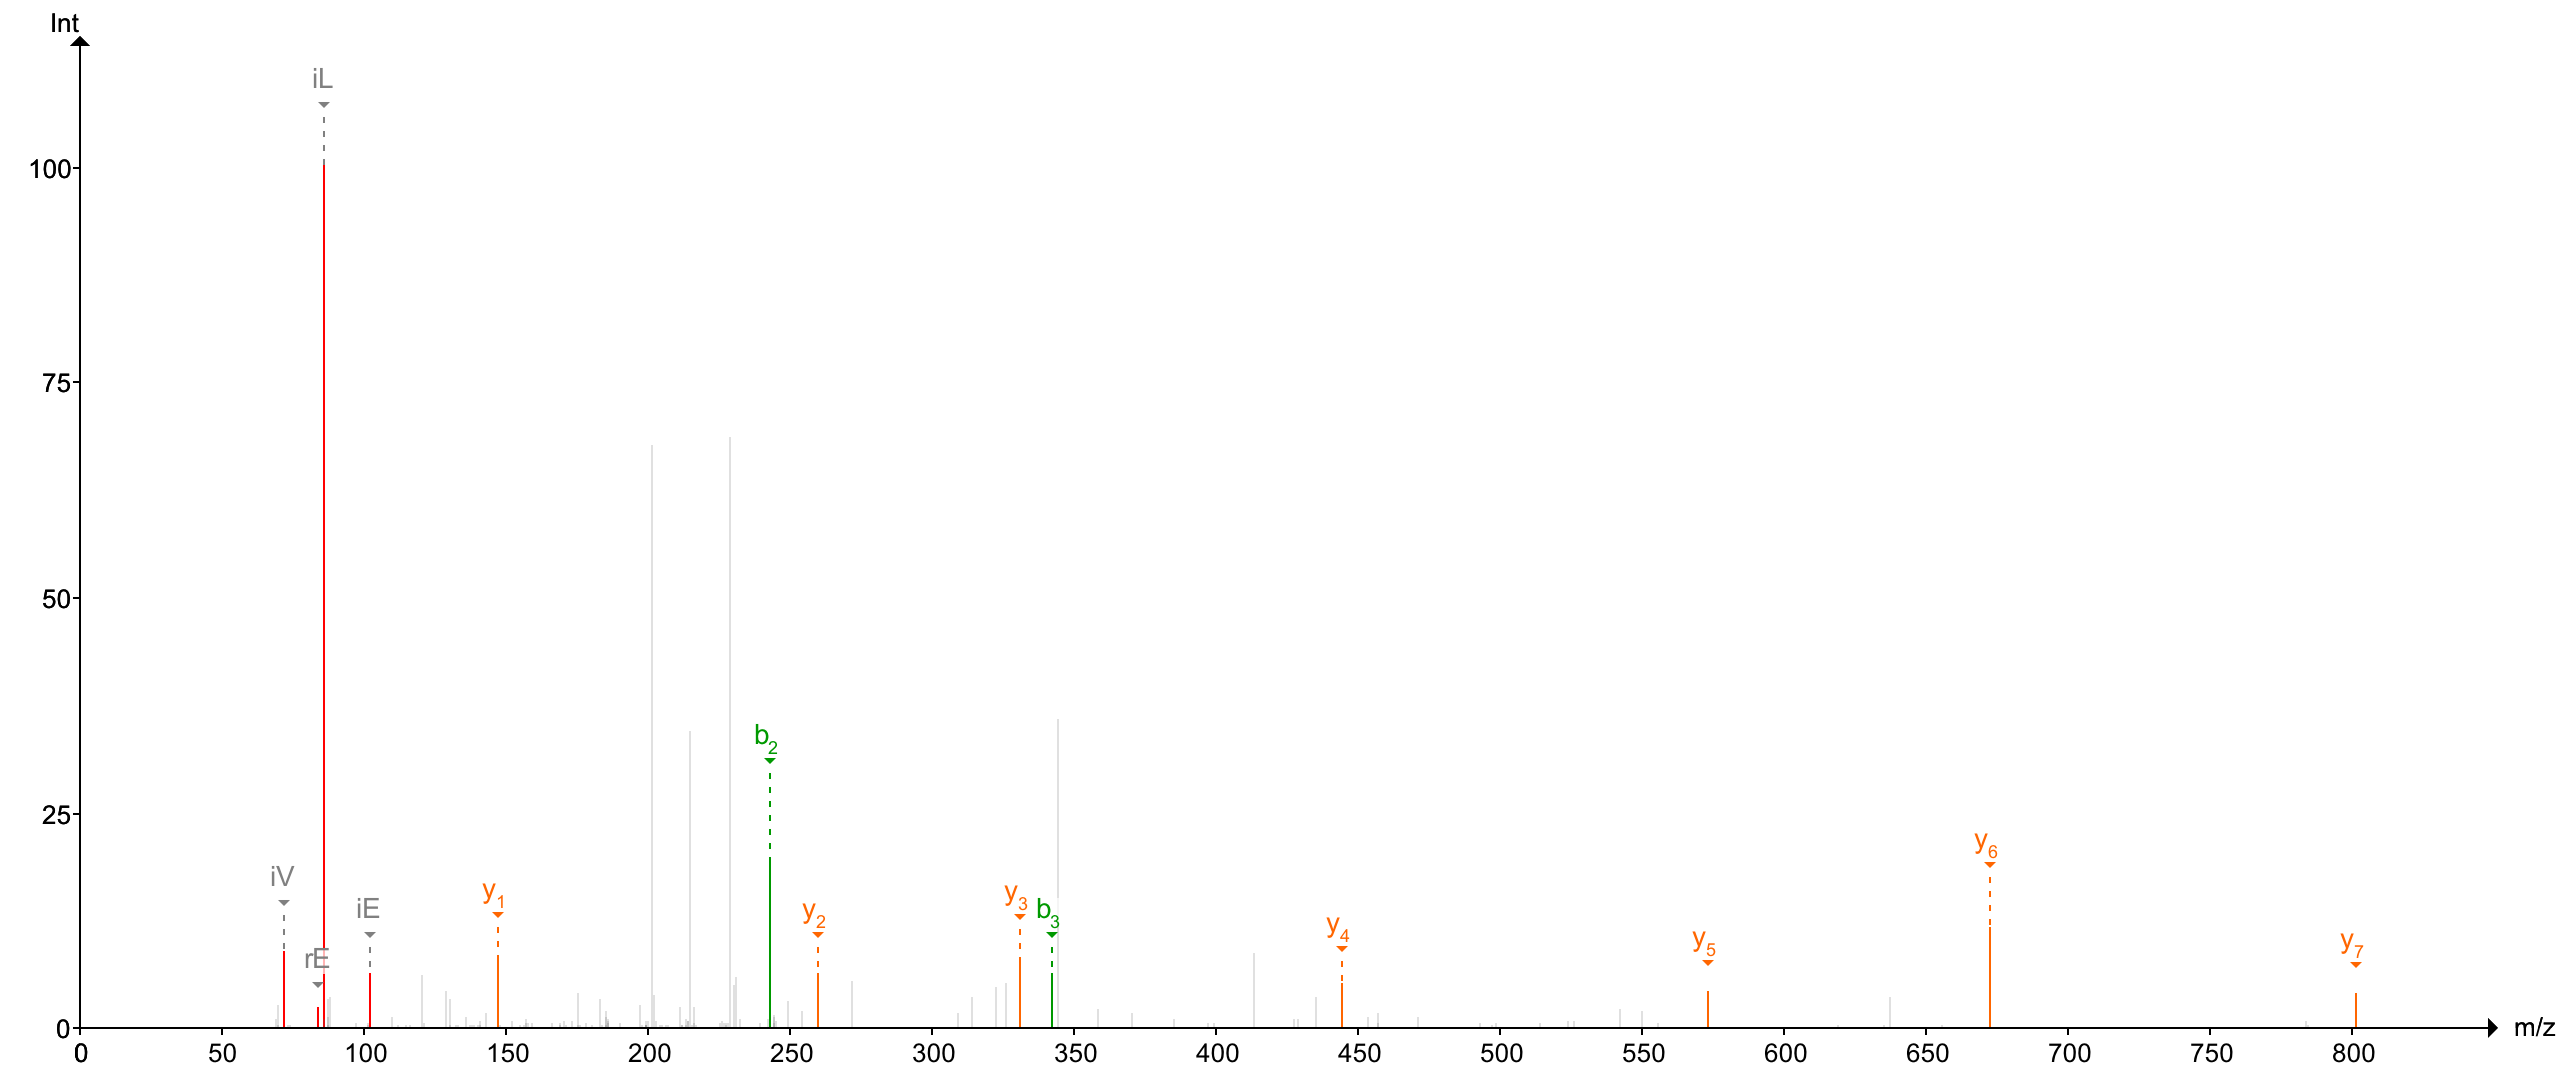

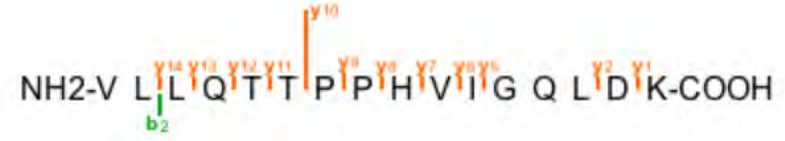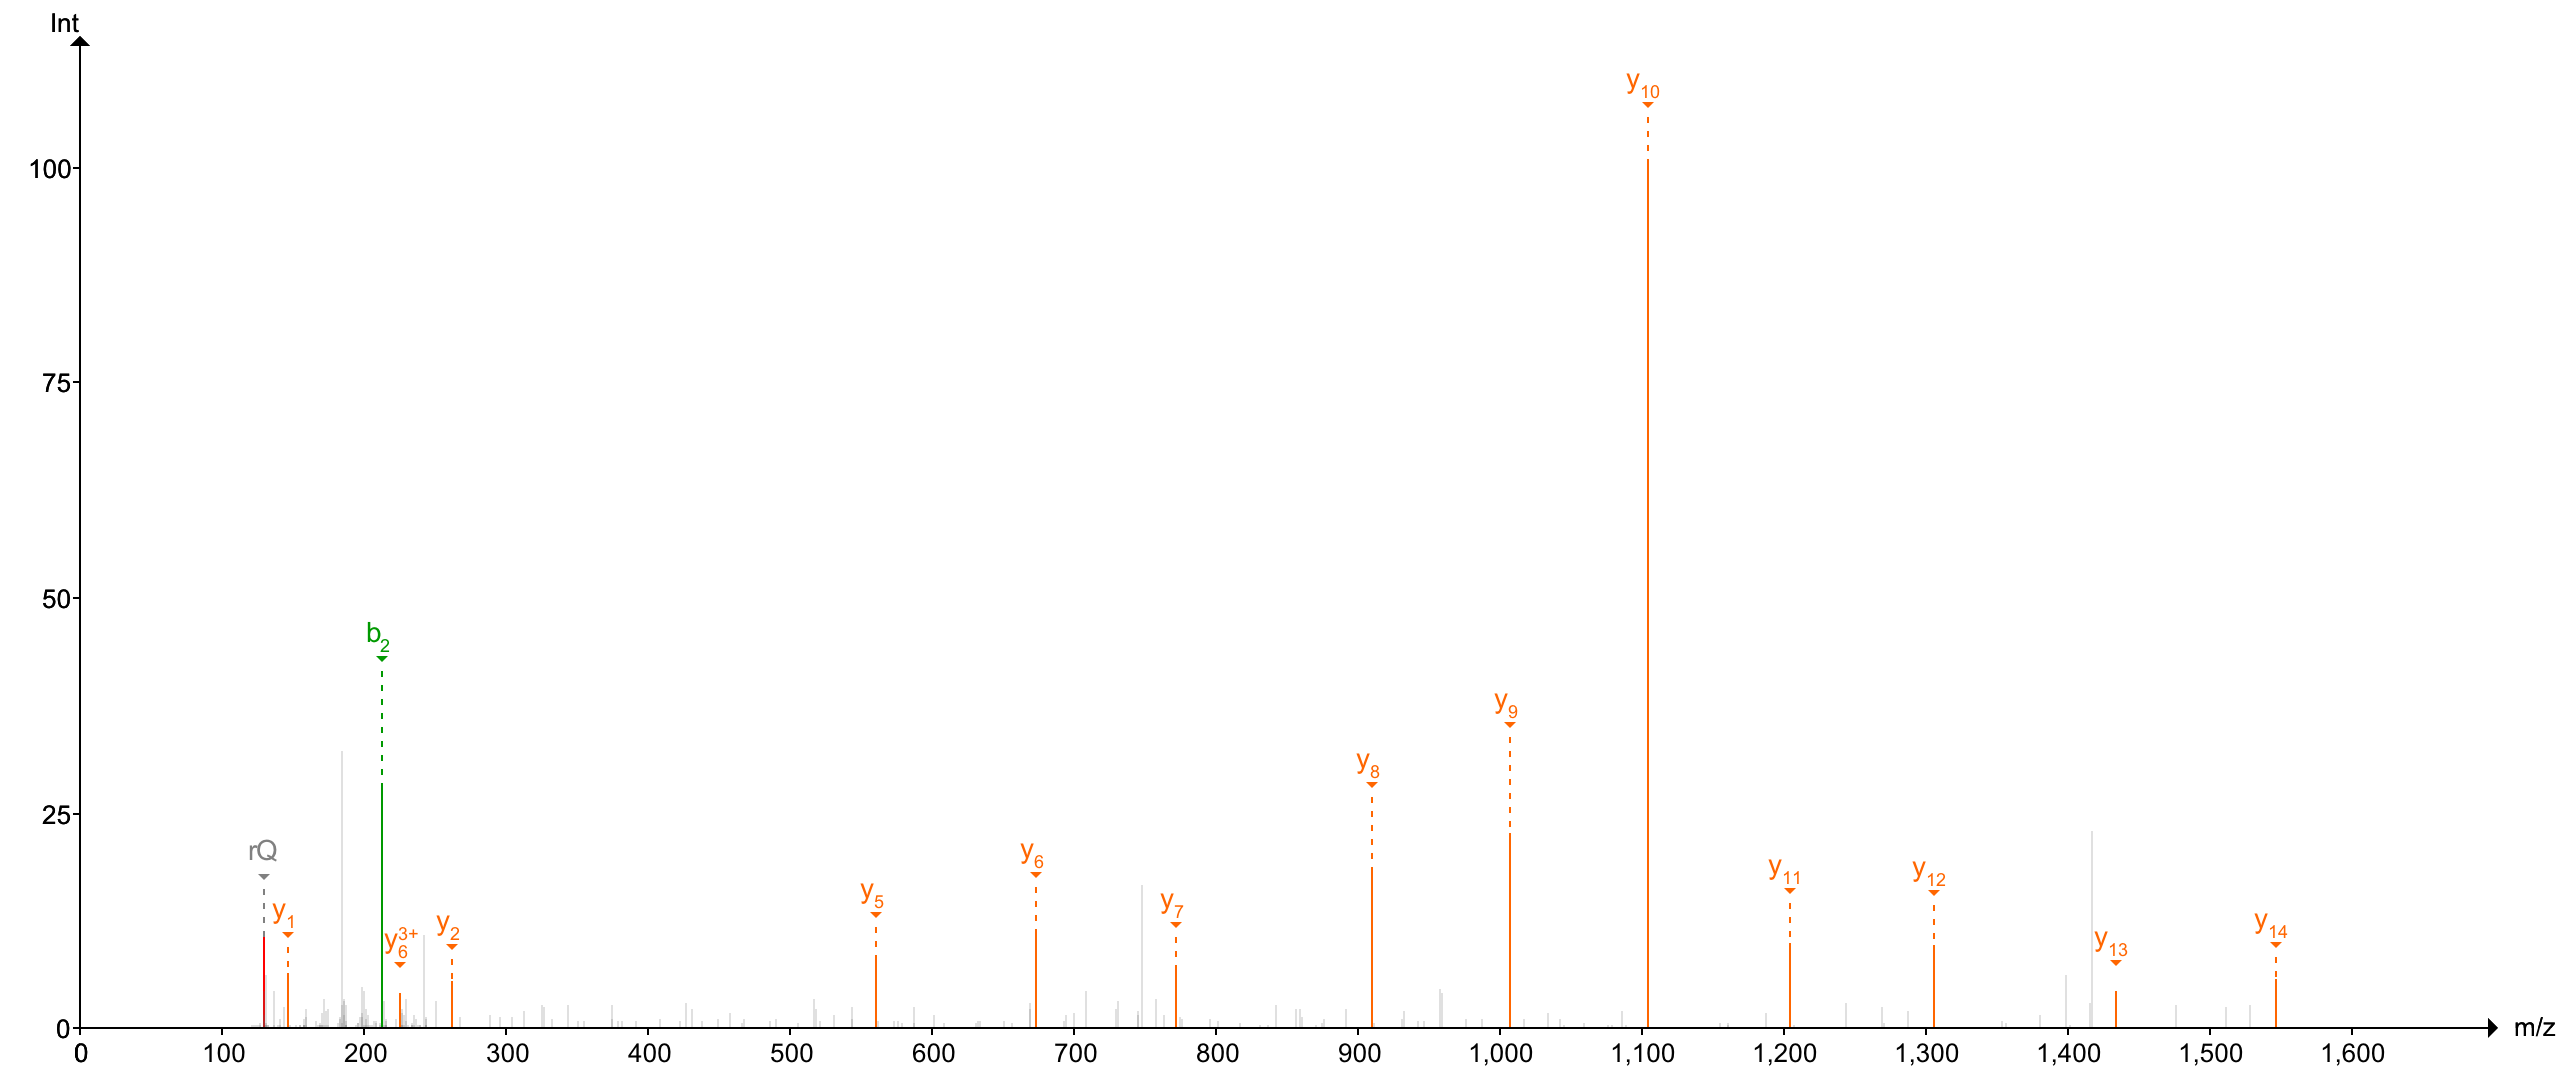



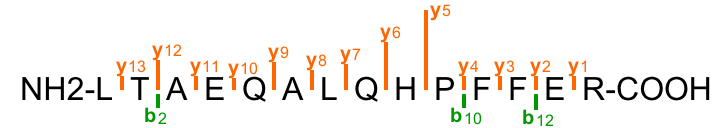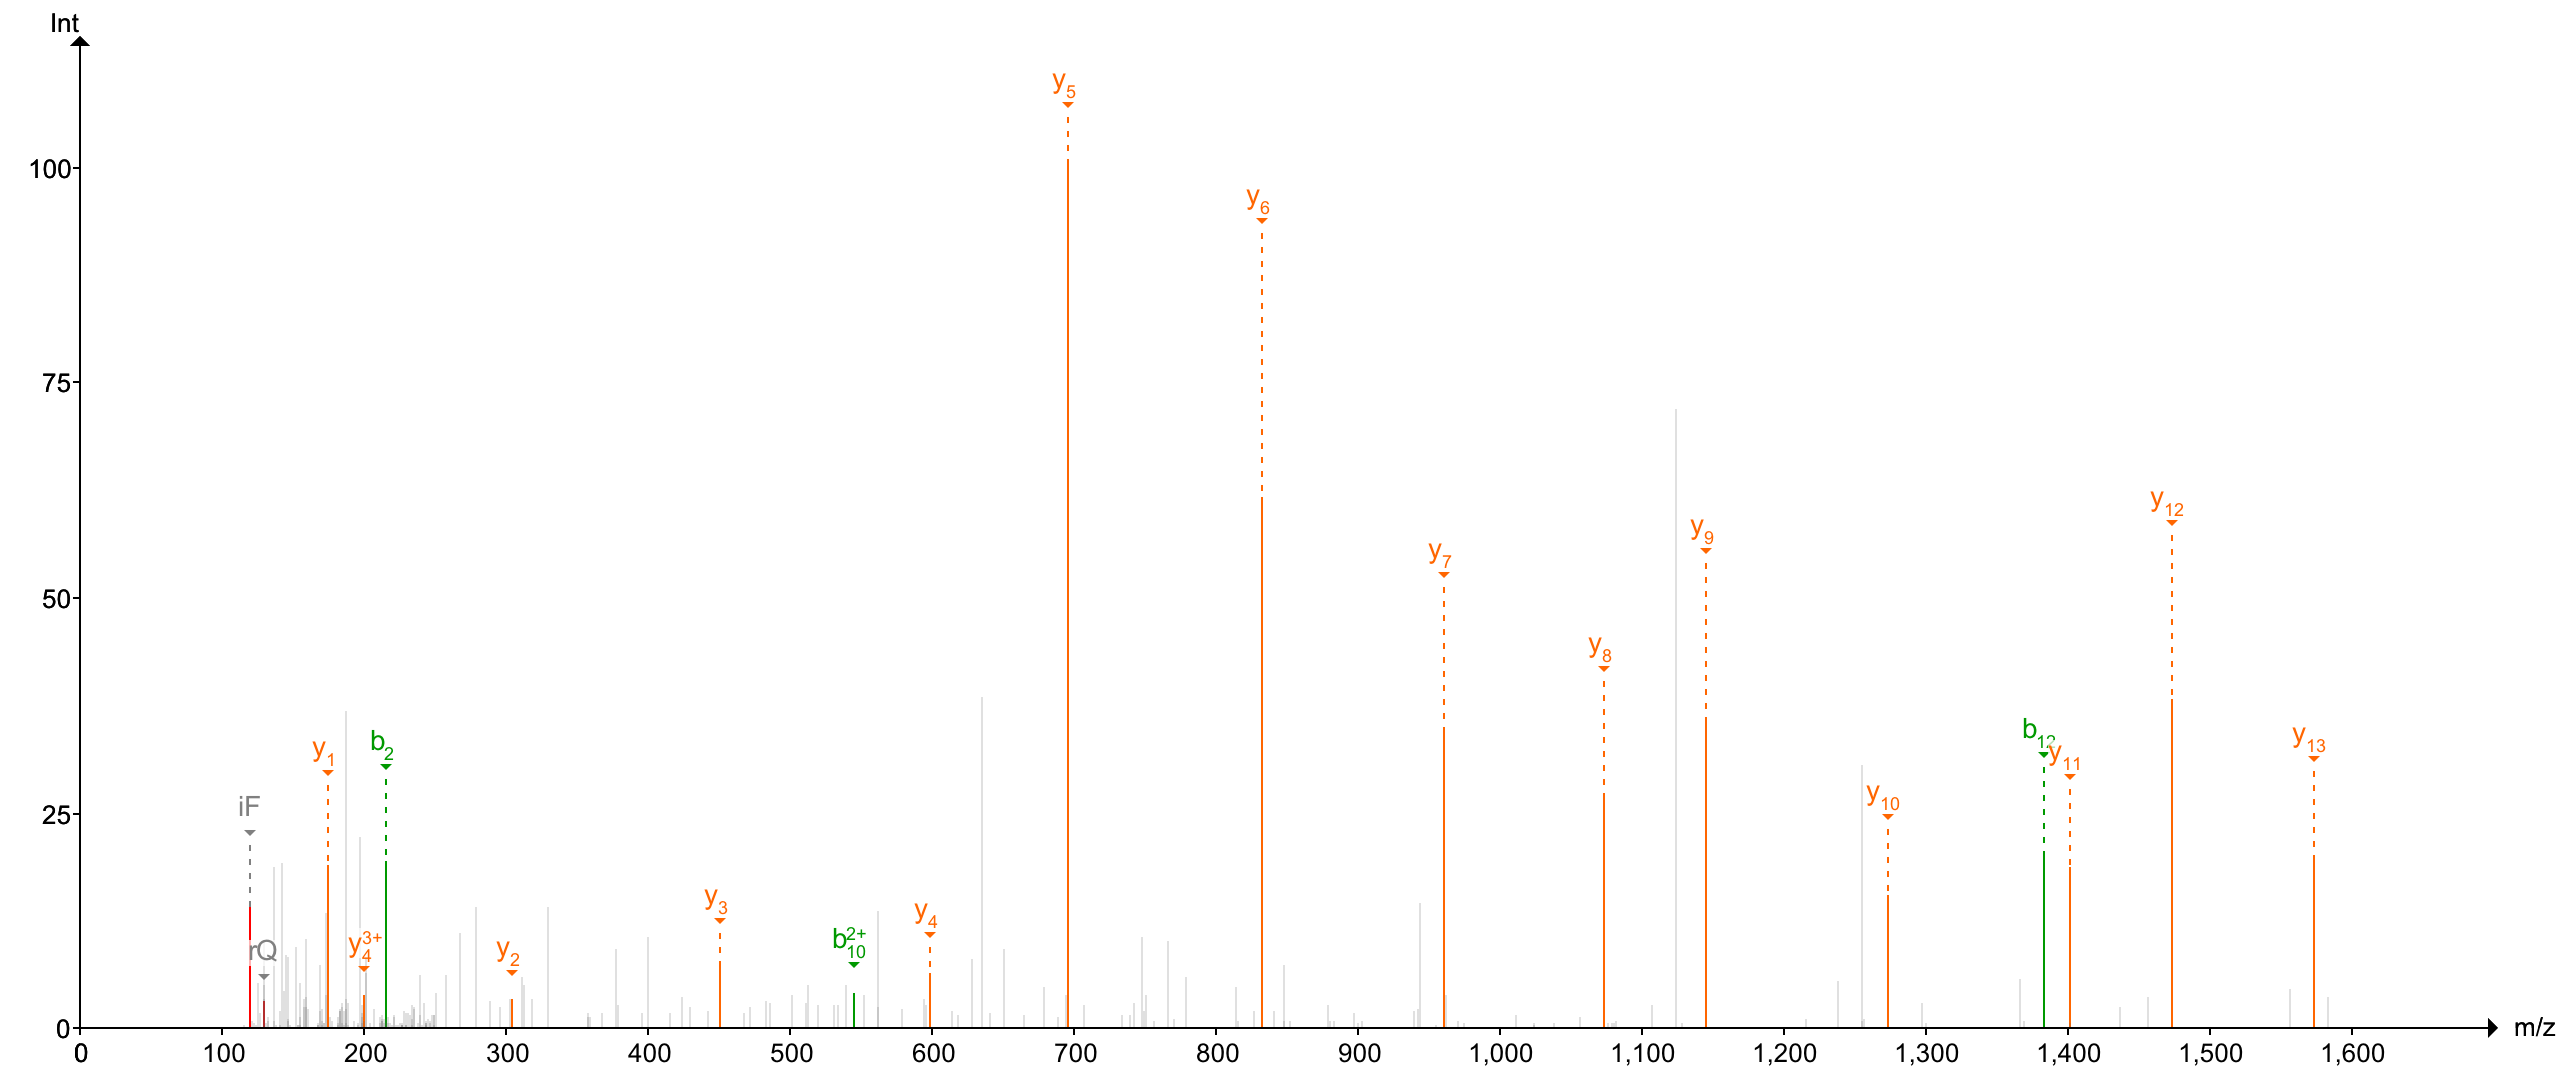

NH<sub>2</sub>-V N F L V N A A G I N R-COOH

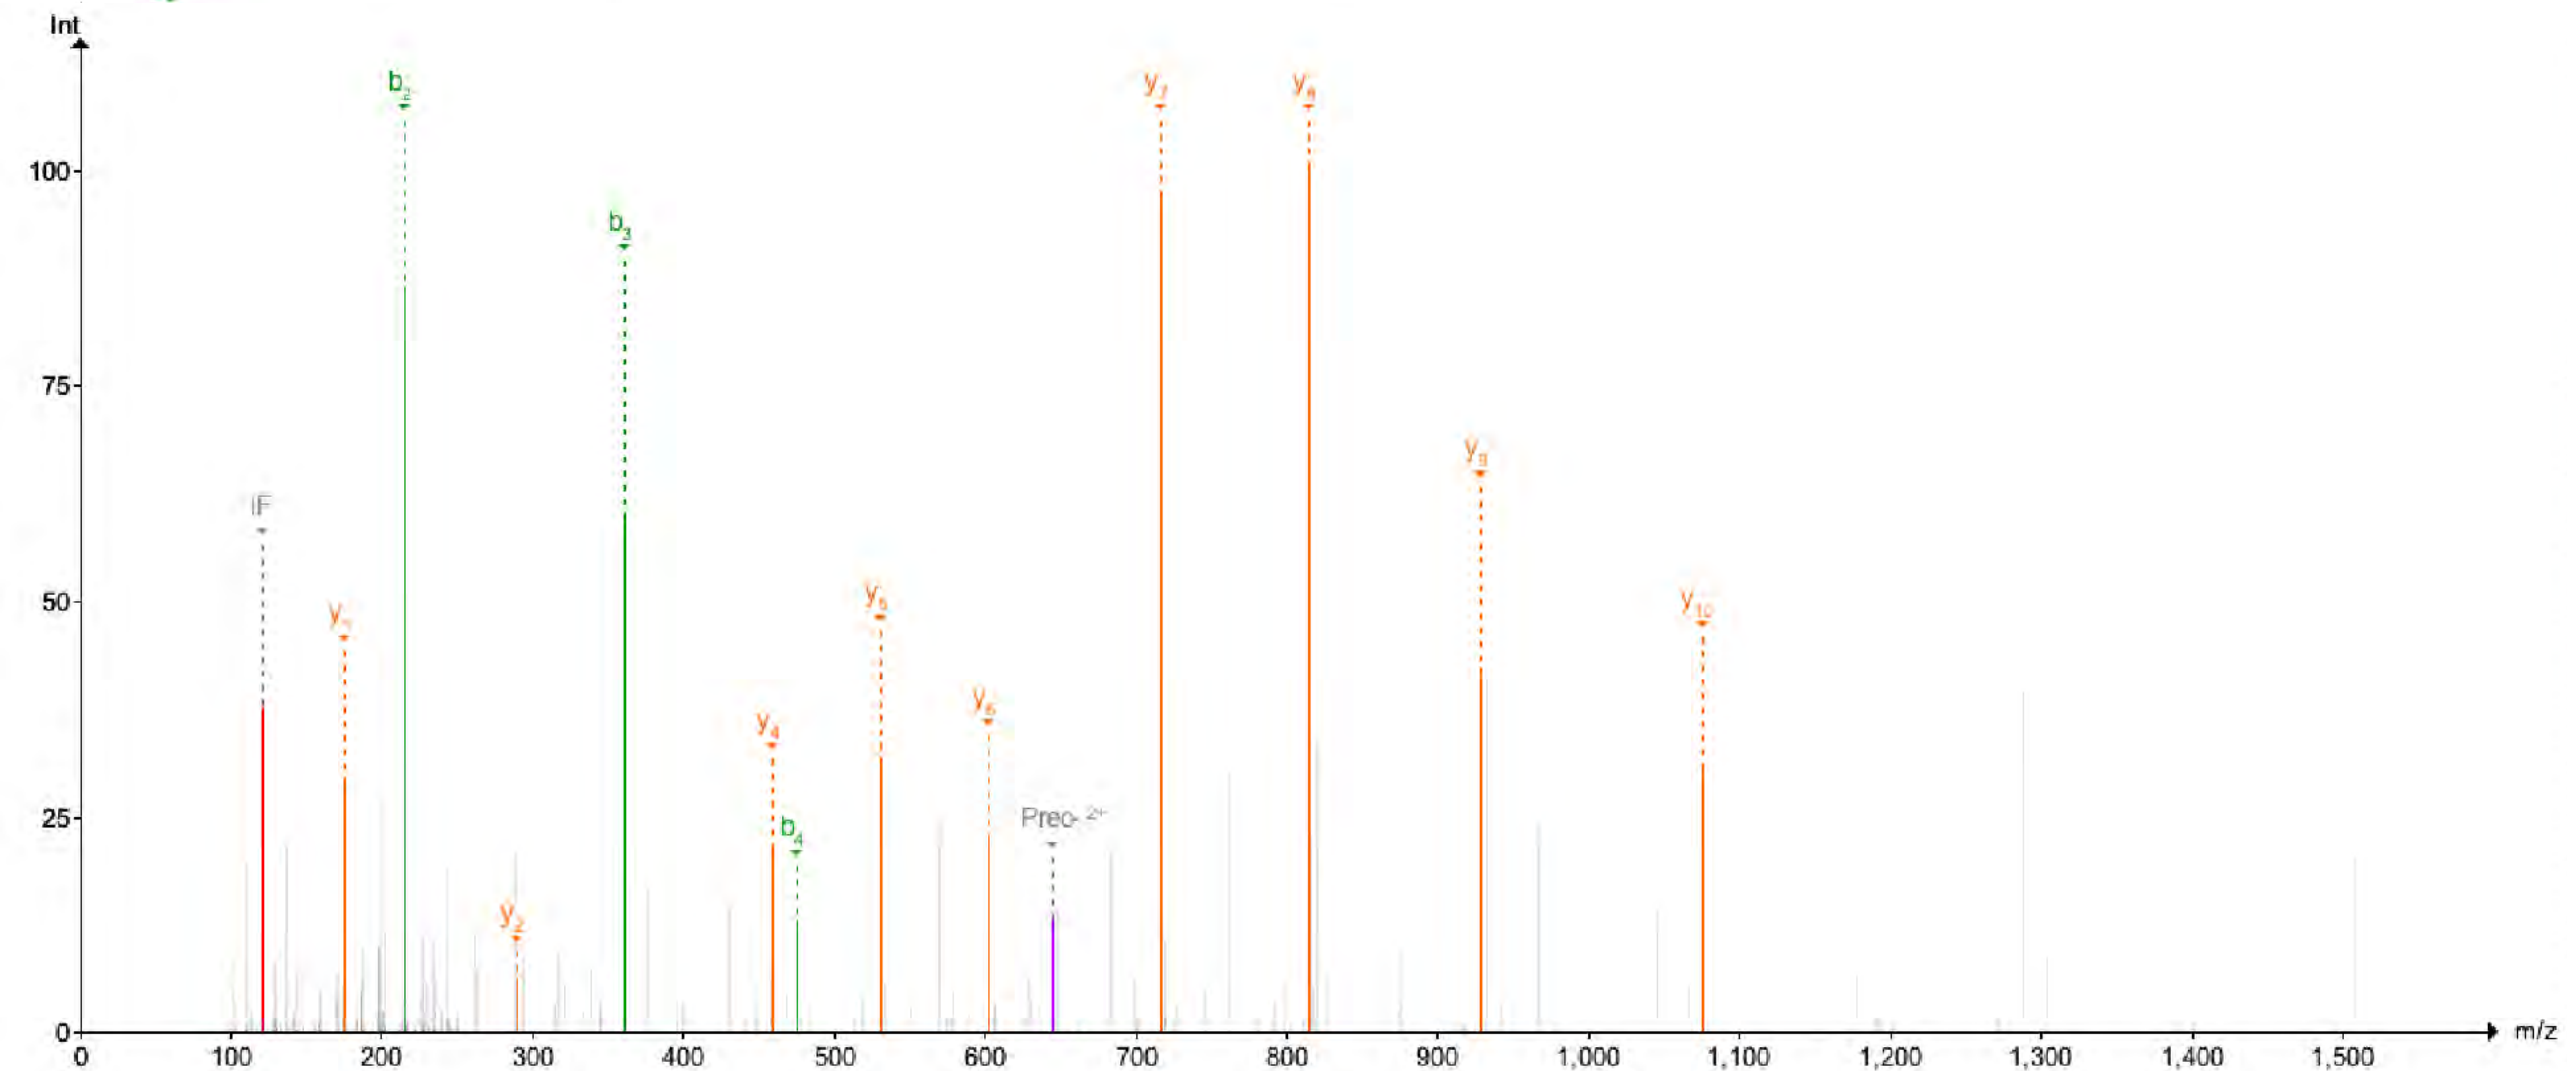

NH<sub>2</sub>-D L<sup>y<sub>8</sub></sup> F<sup>y<sub>7</sub></sup> V<sup>y<sub>6</sub></sup> P<sup>y<sub>4</sub></sup> R<sup>y<sub>1</sub></sup> P V L<sup>y<sub>1</sub></sup> R-COOH  
b<sub>2</sub>

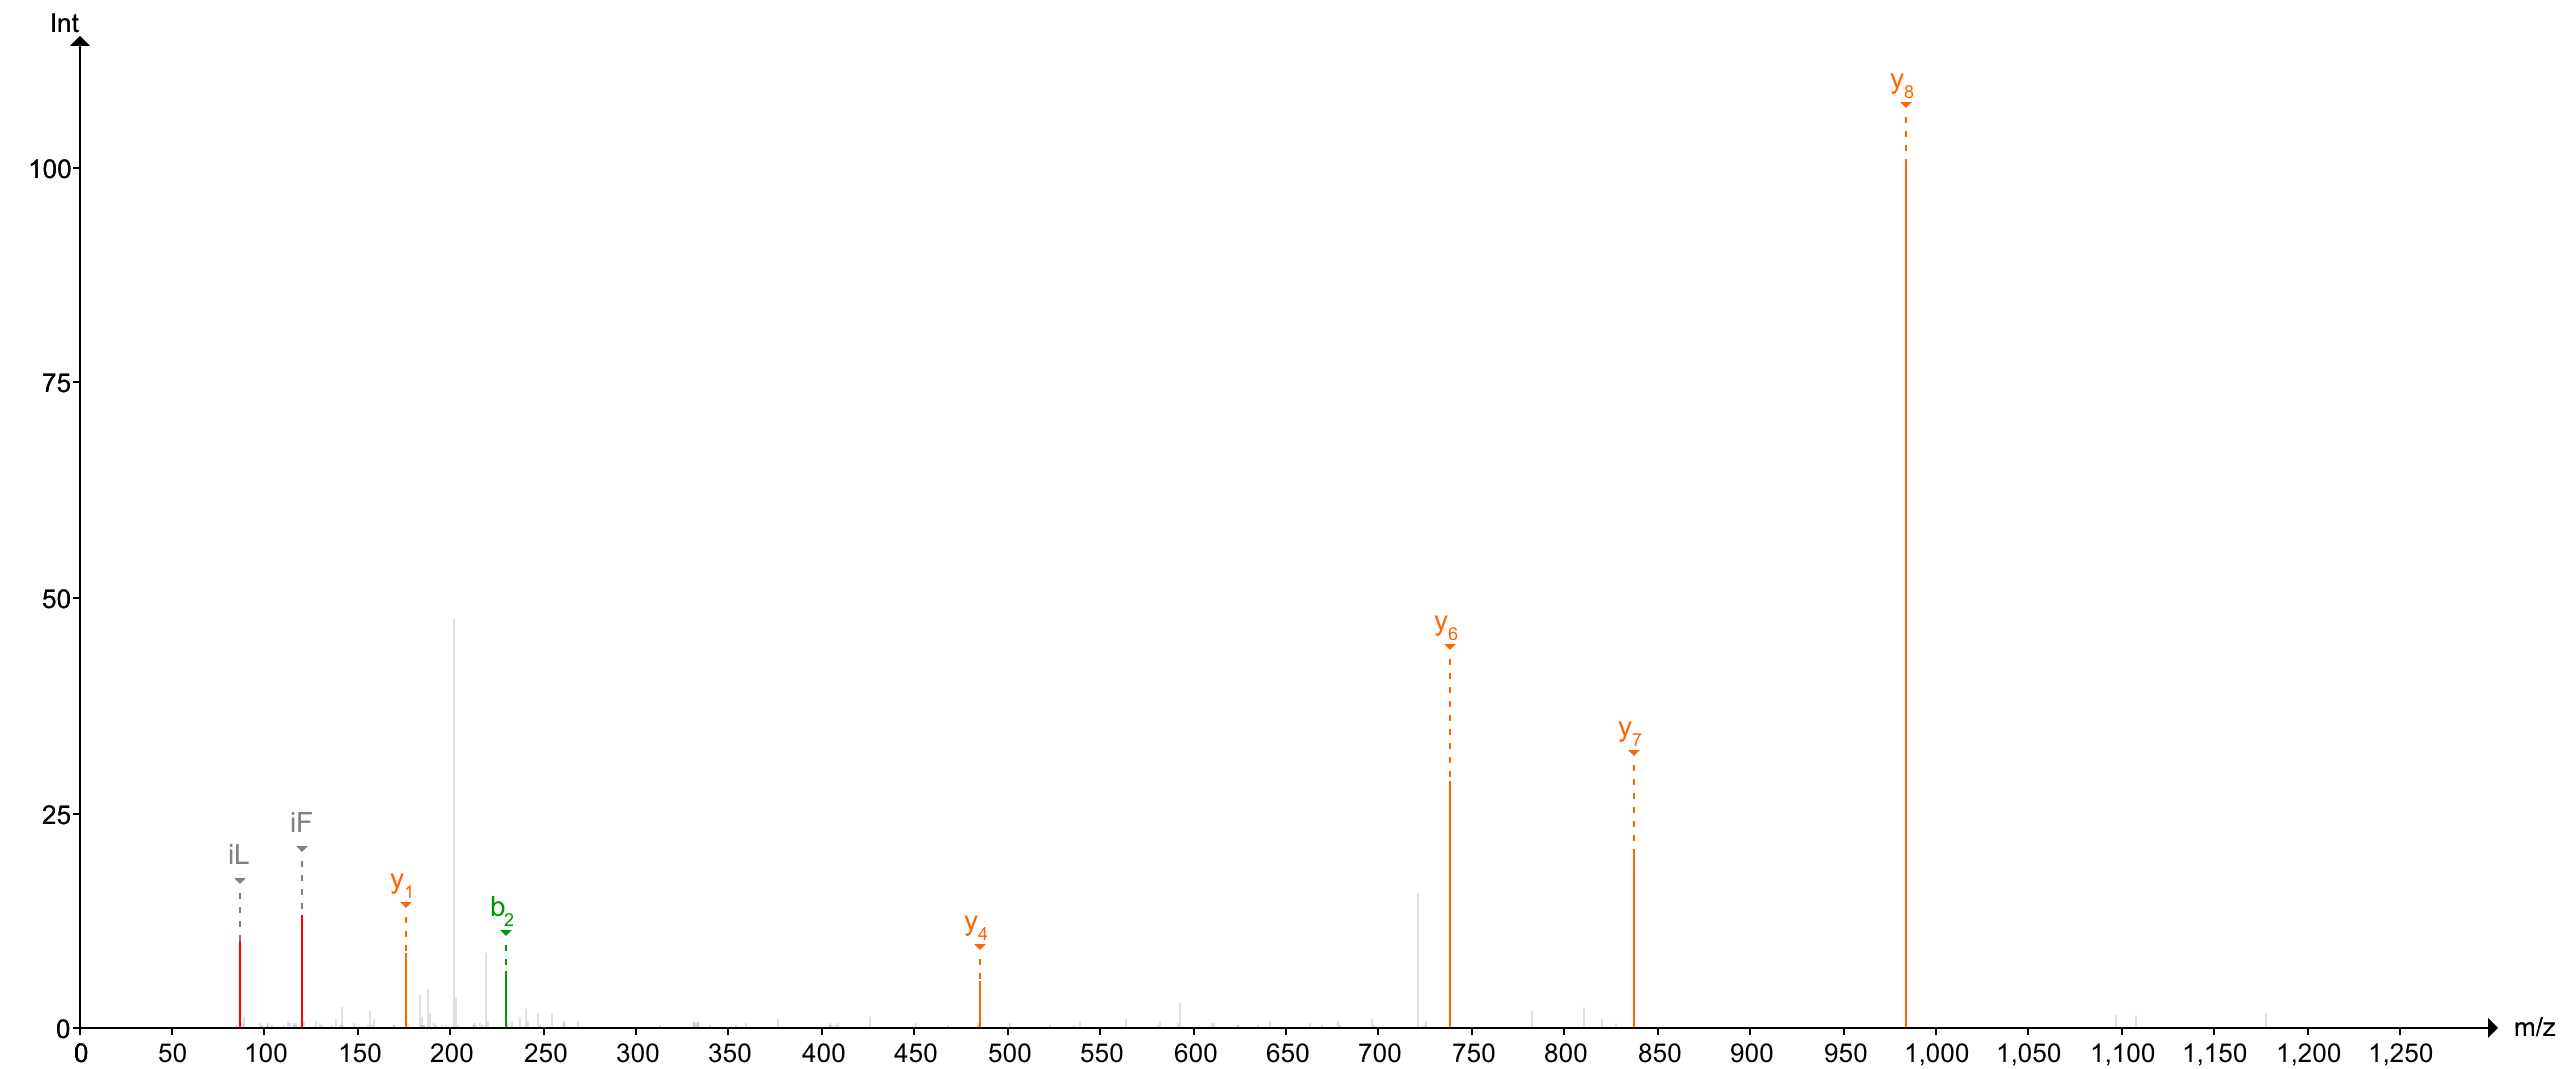

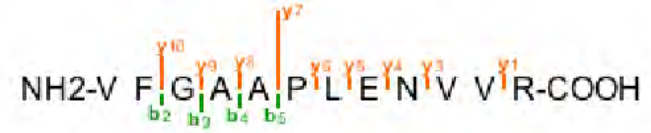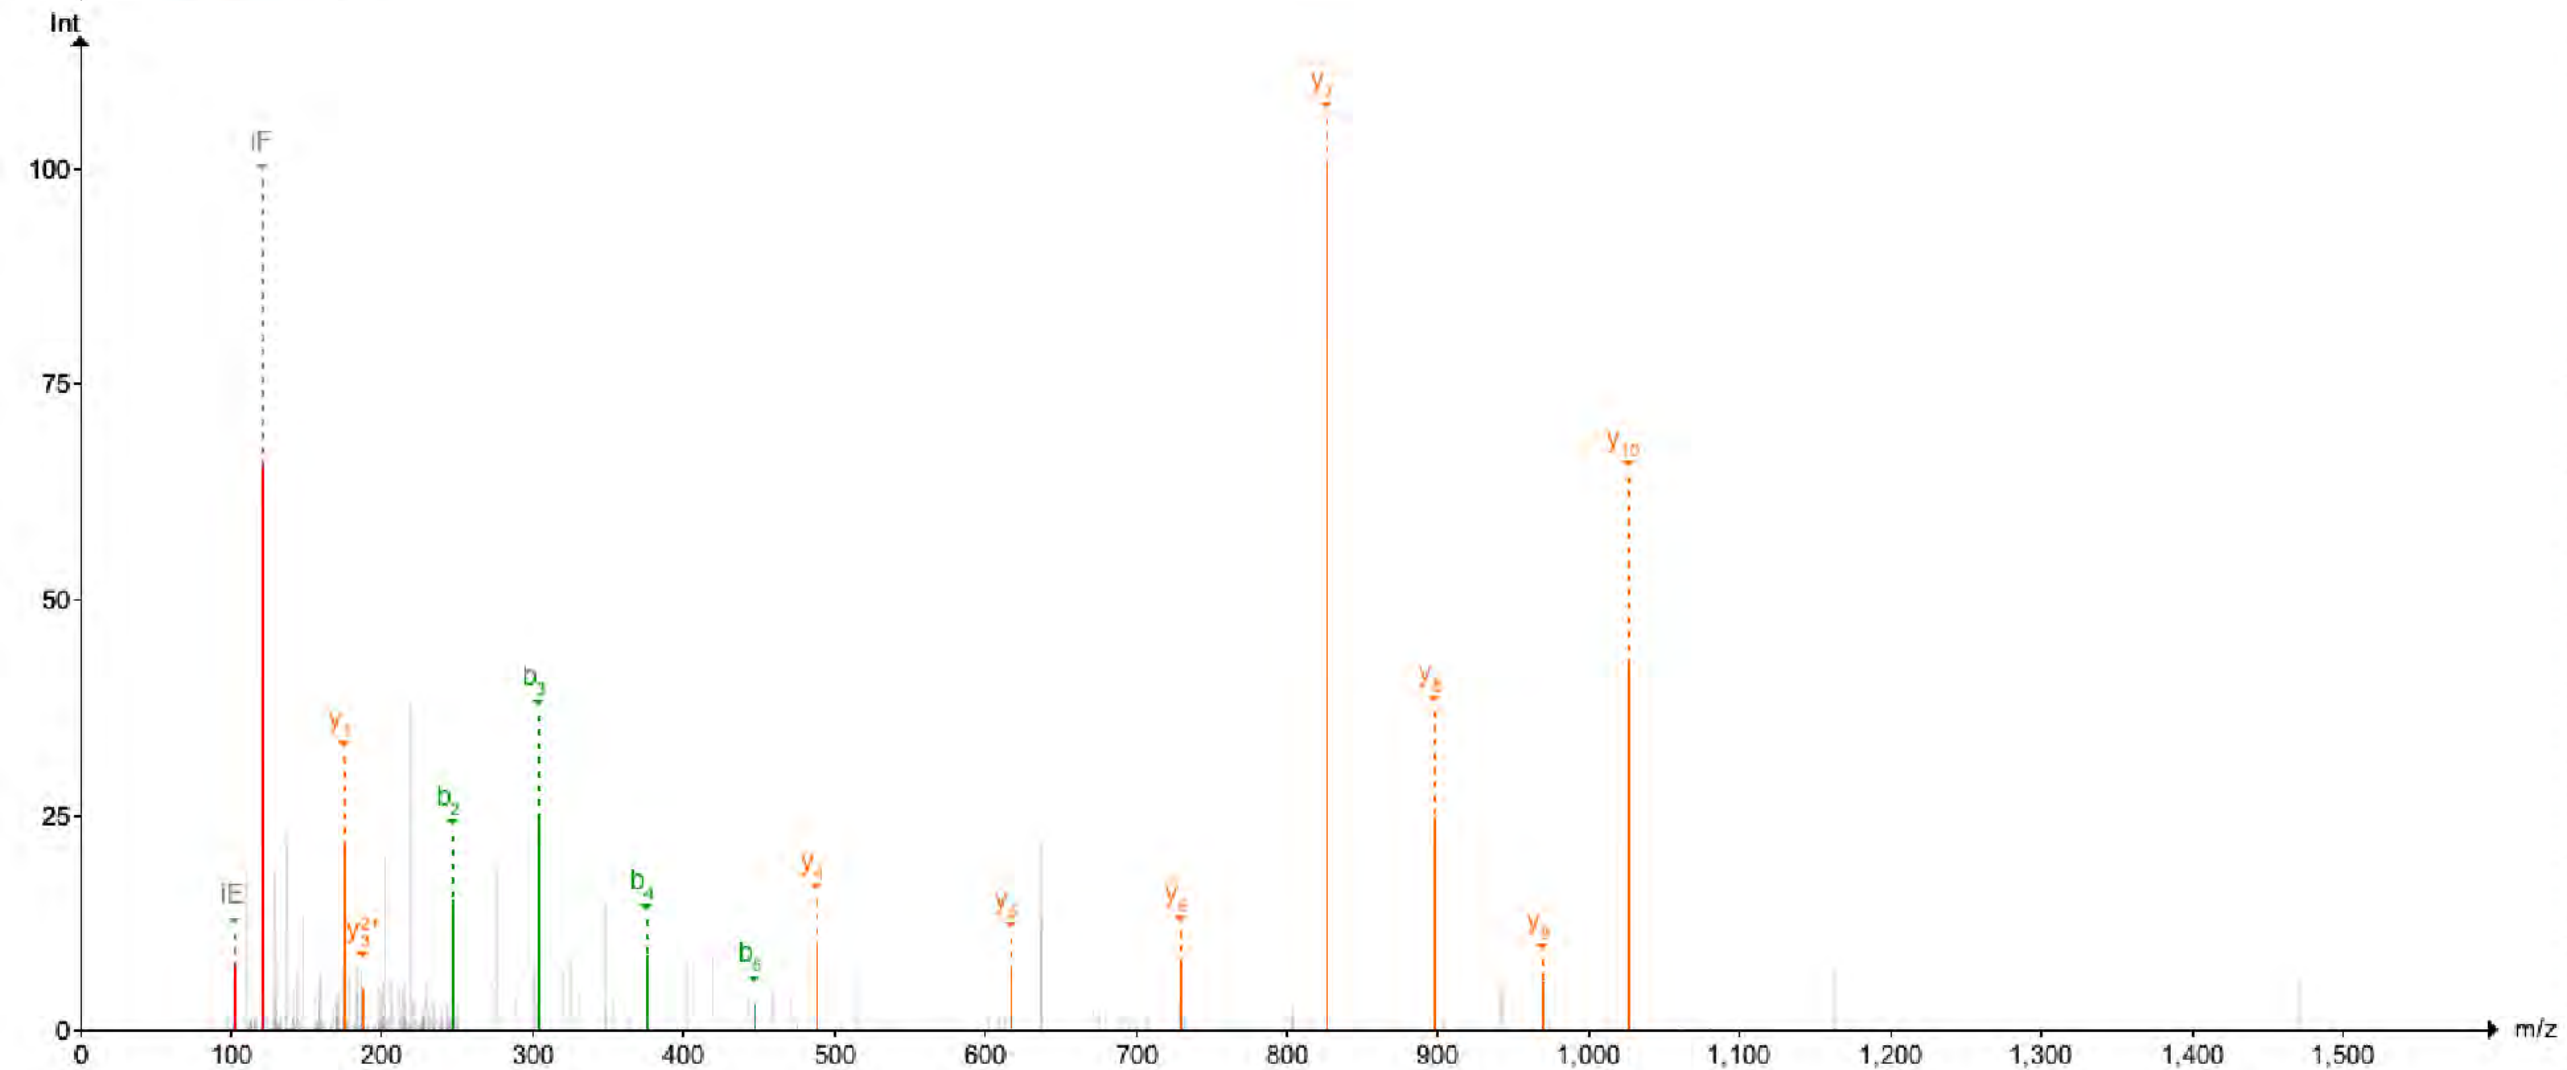

NH<sub>2</sub>-S D I I I I F F Q R-COOH  
y<sub>6</sub> y<sub>5</sub> y<sub>4</sub> y<sub>3</sub> y<sub>2</sub> y<sub>1</sub>  
b<sub>2</sub> b<sub>3</sub> b<sub>4</sub>

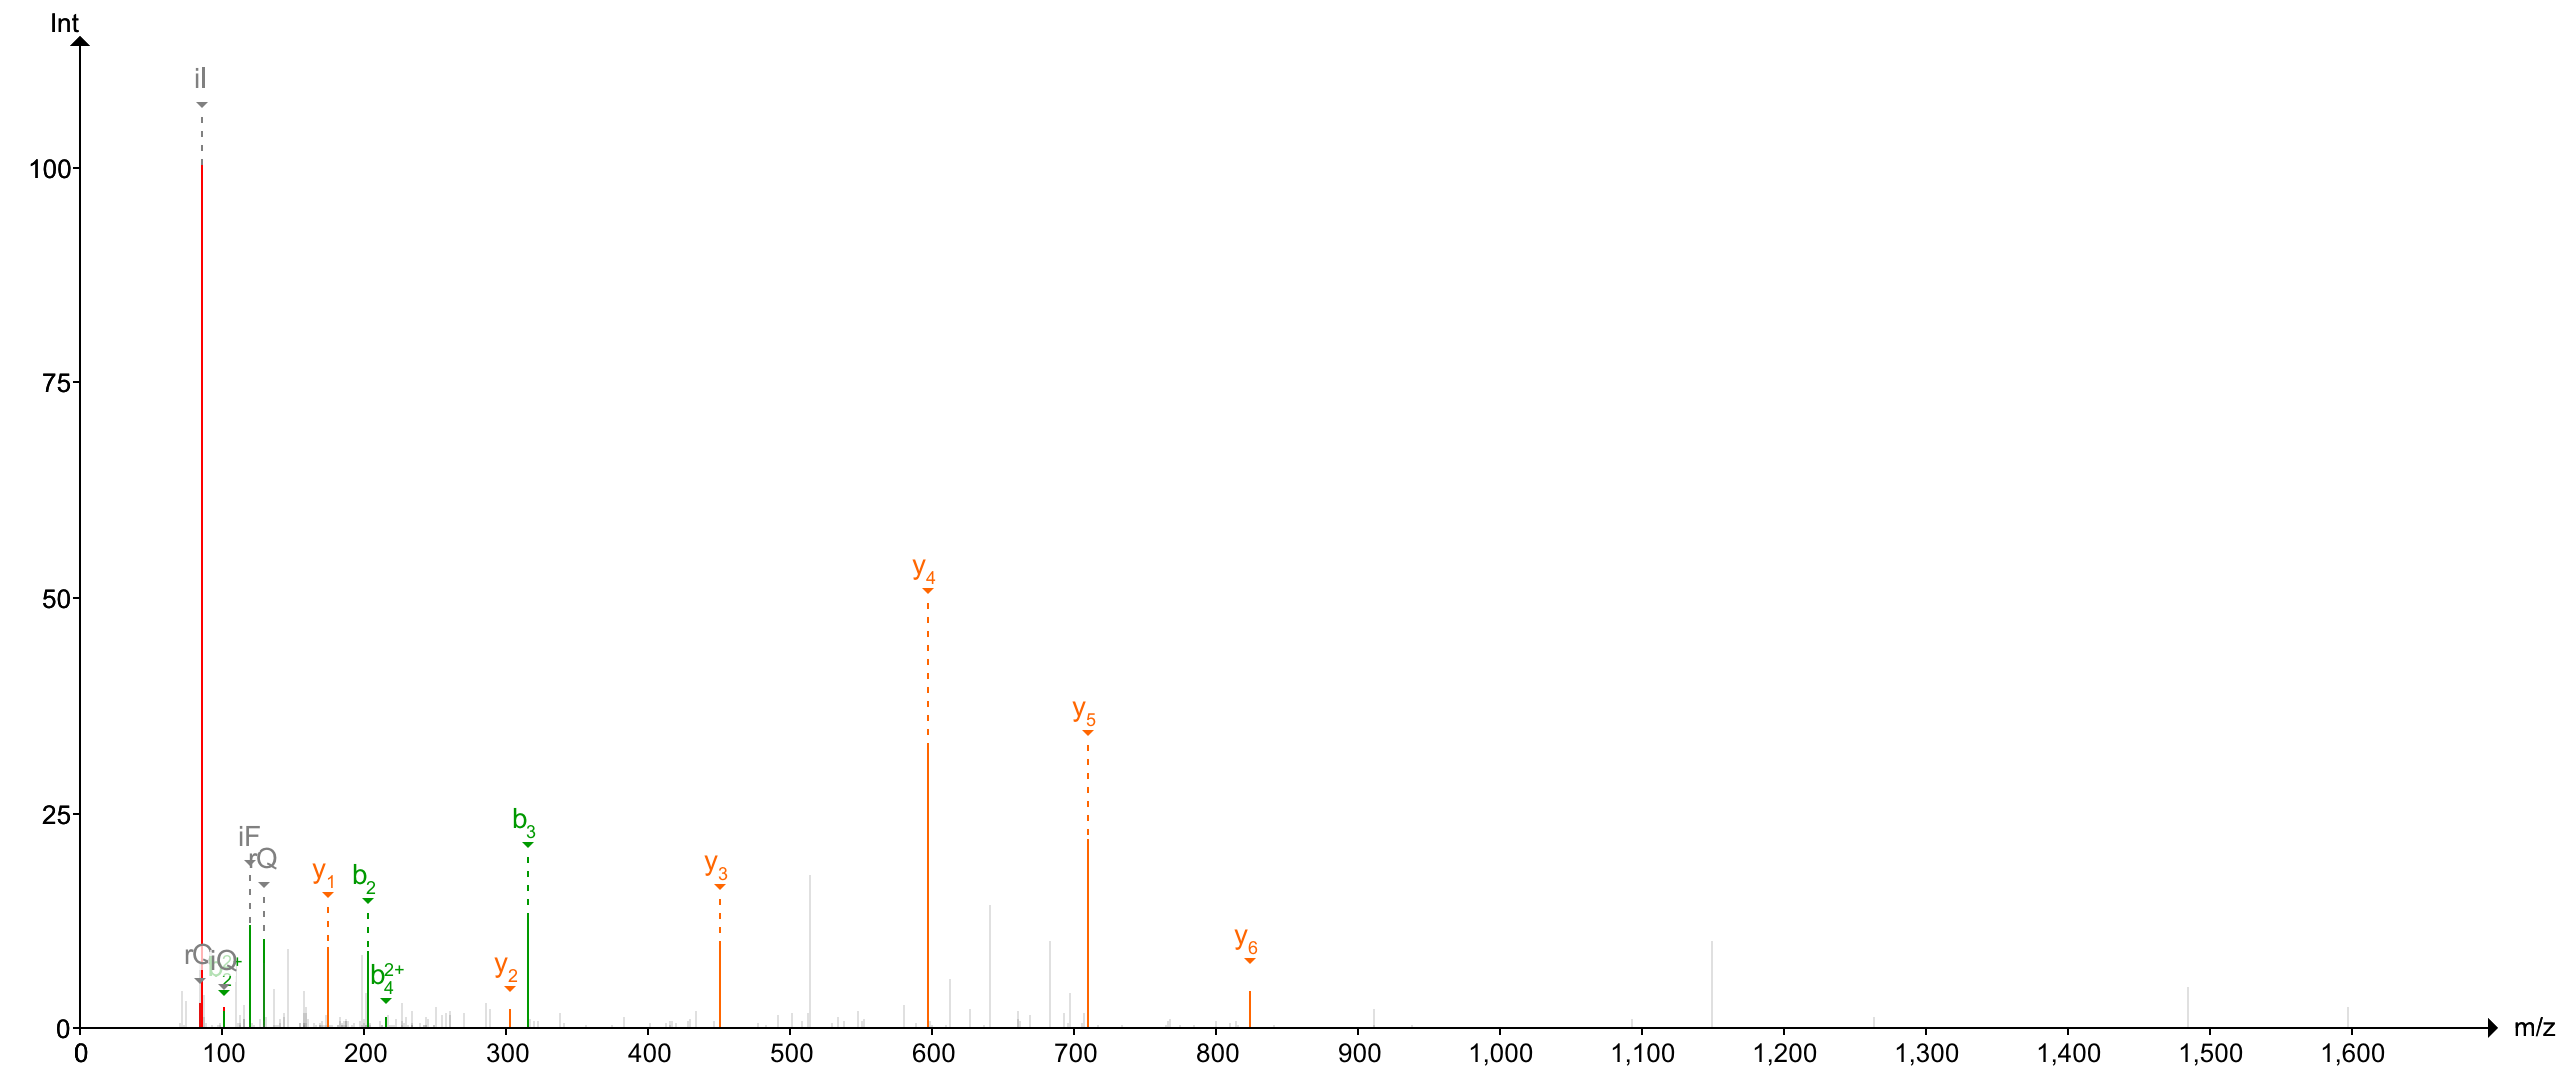

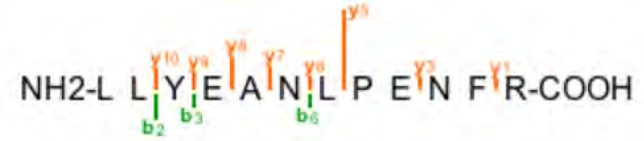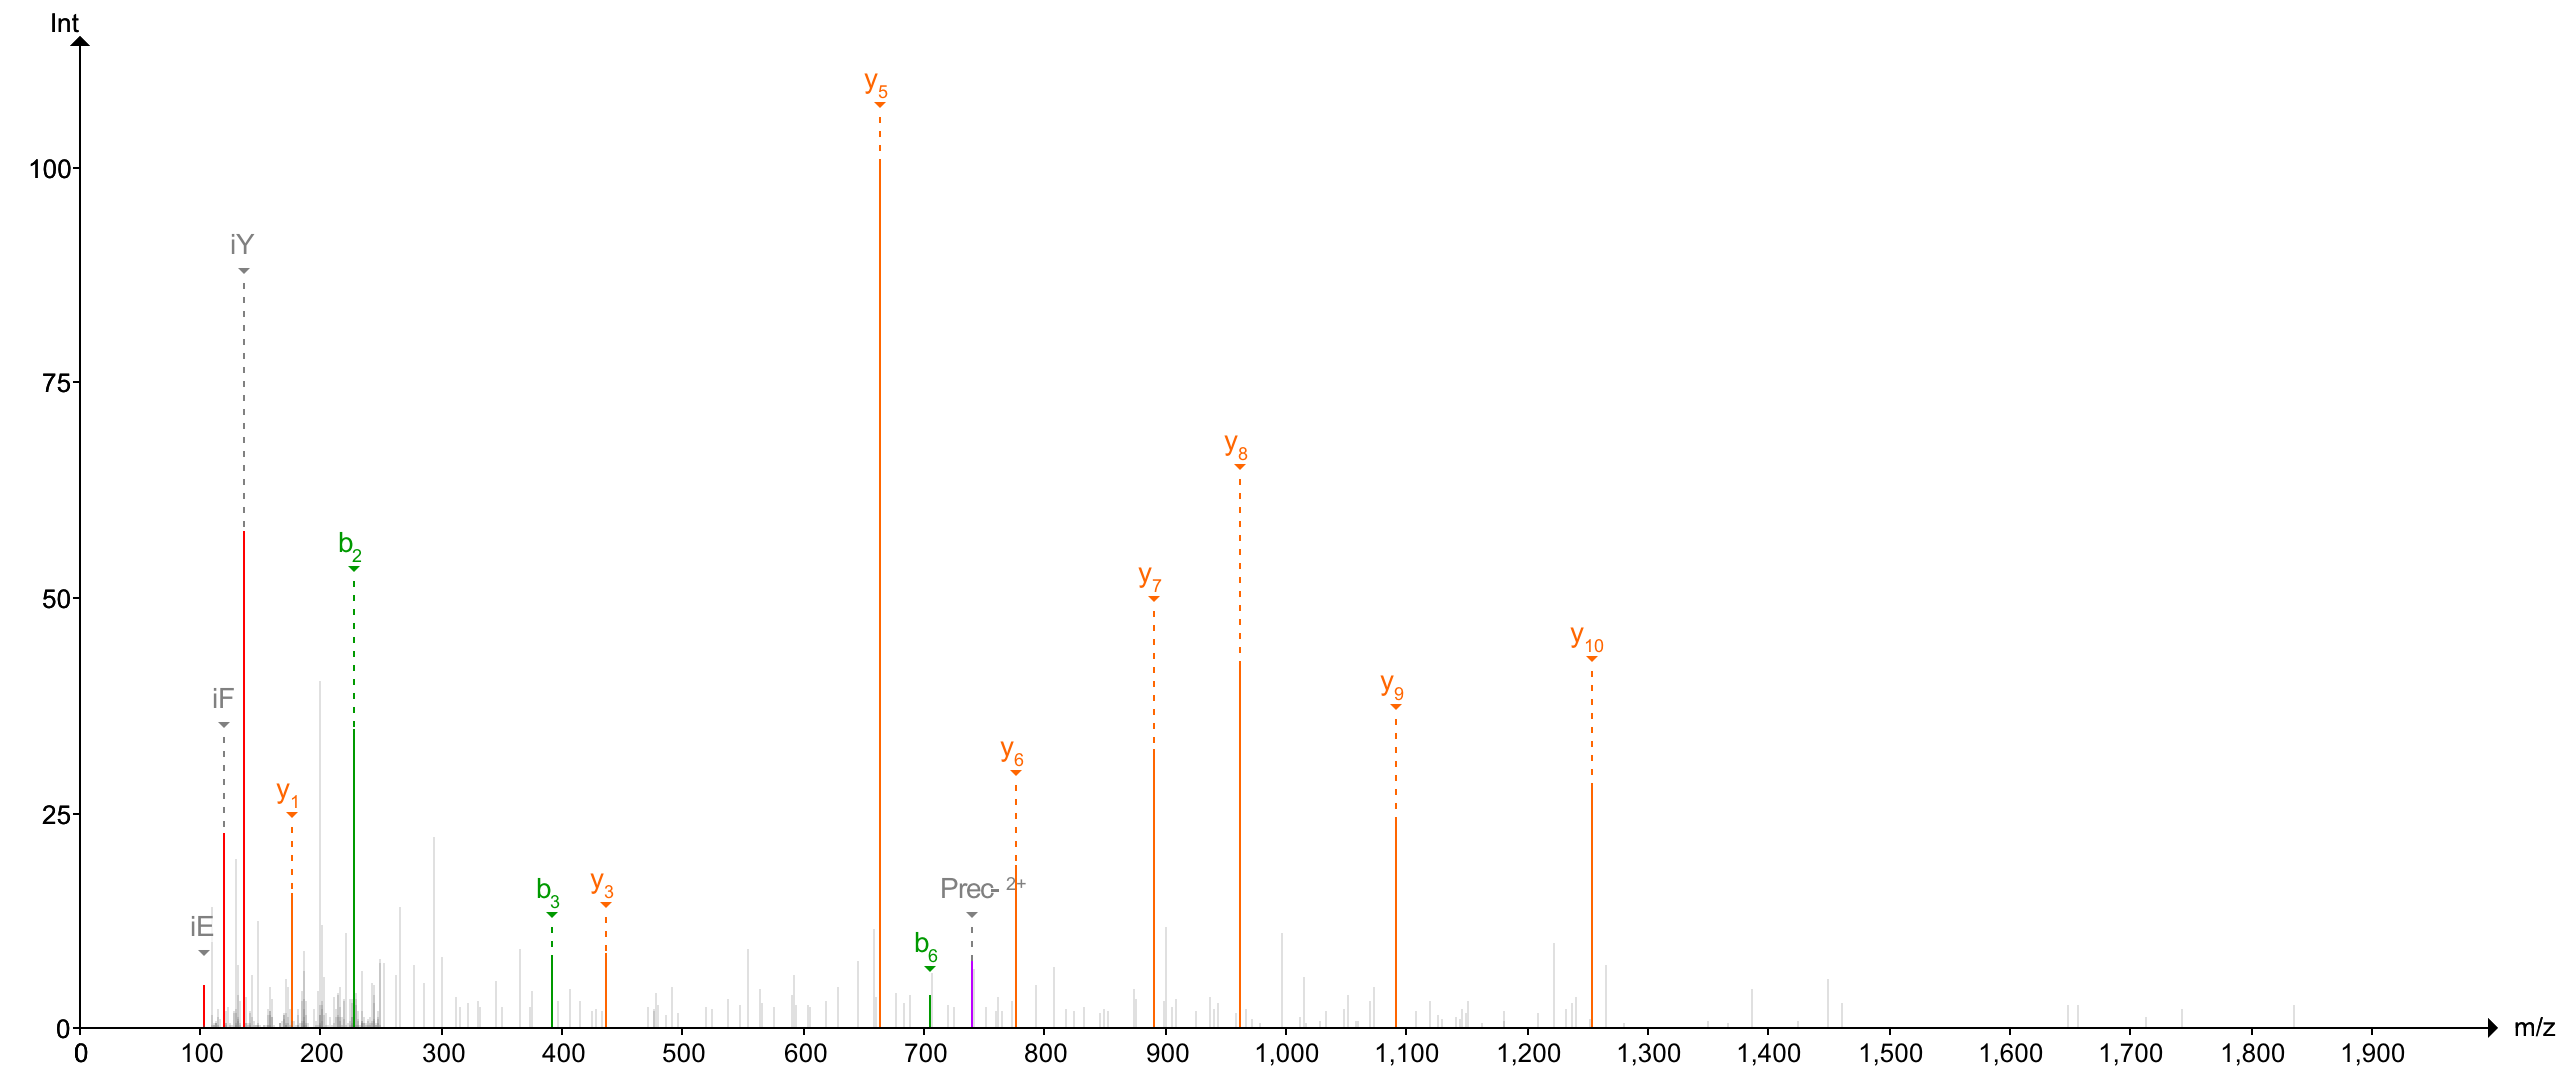

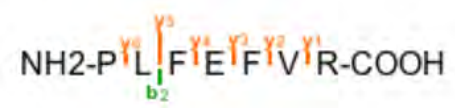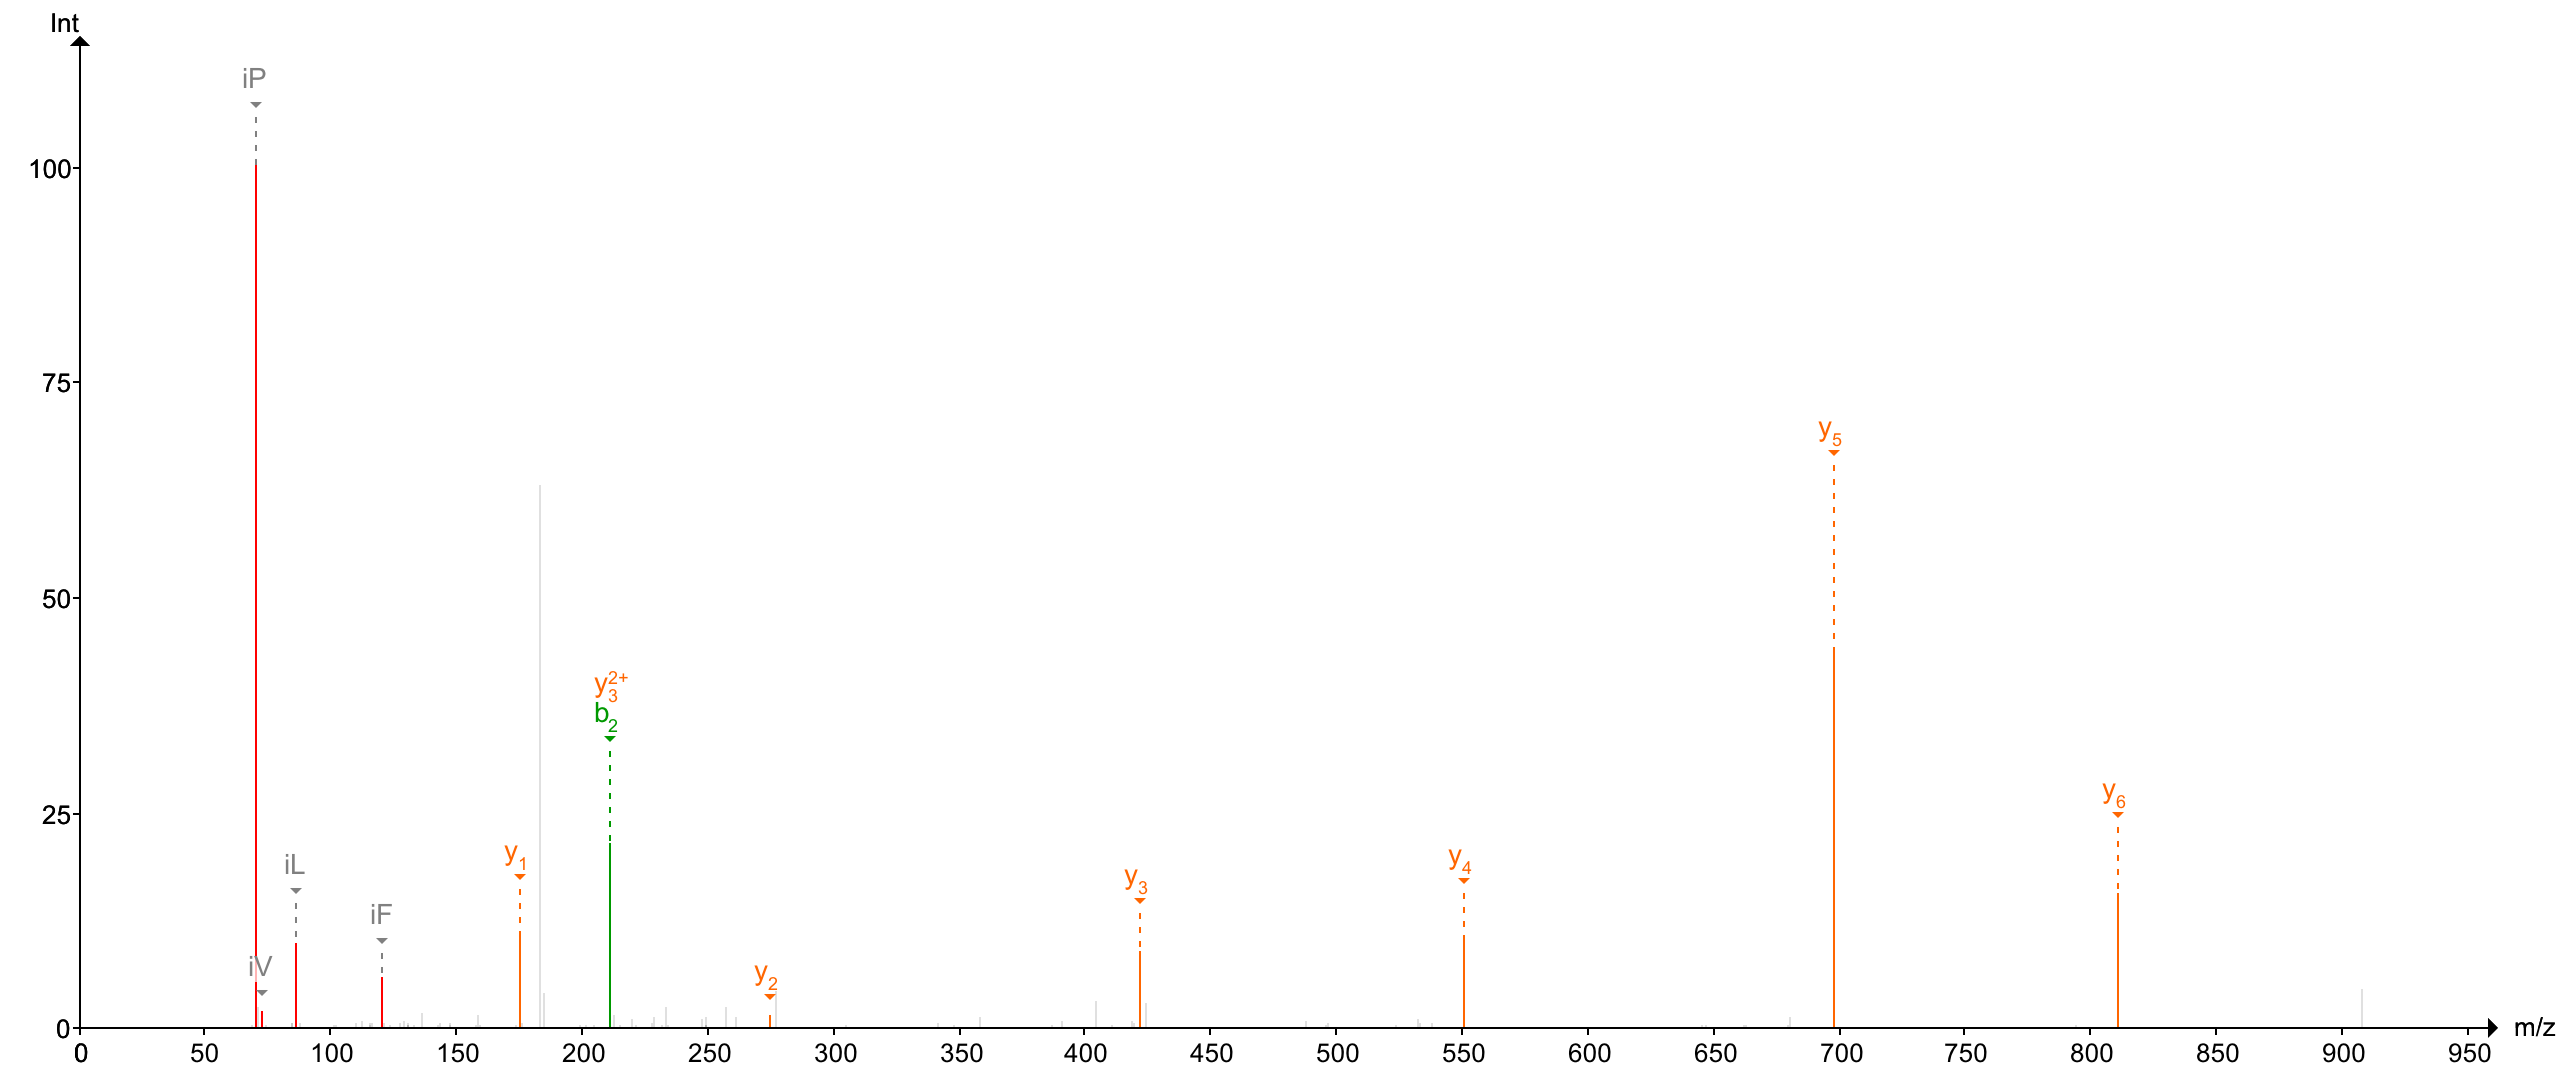

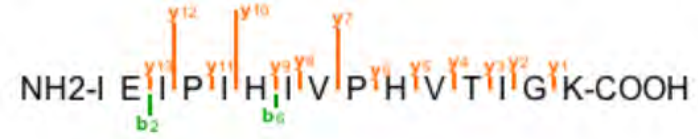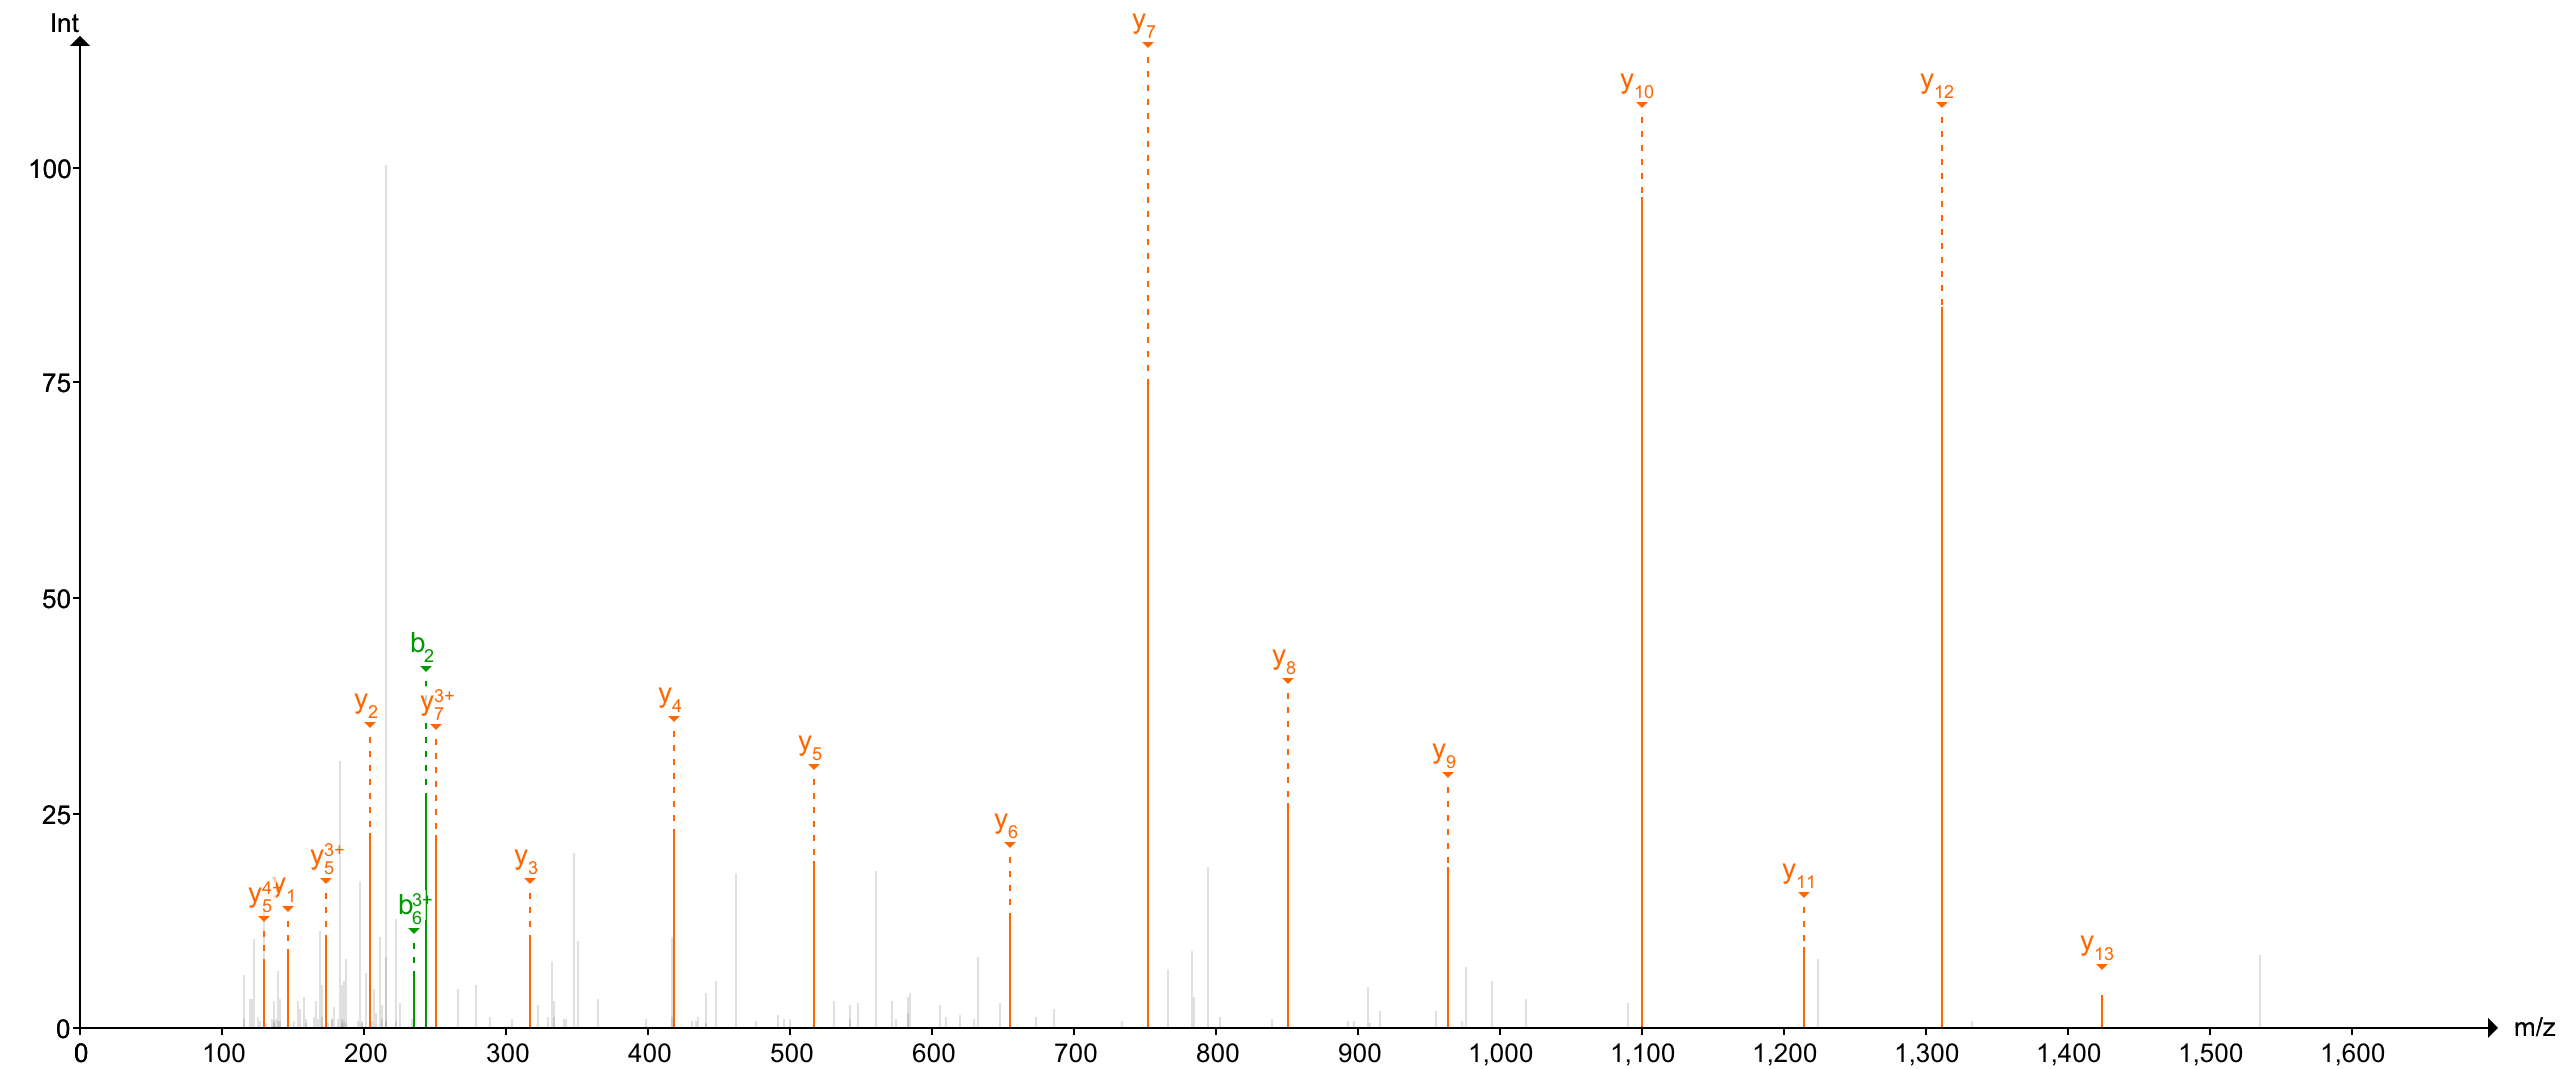



NH<sub>2</sub>-L Q A V E V V I T H L A P G T K-COOH

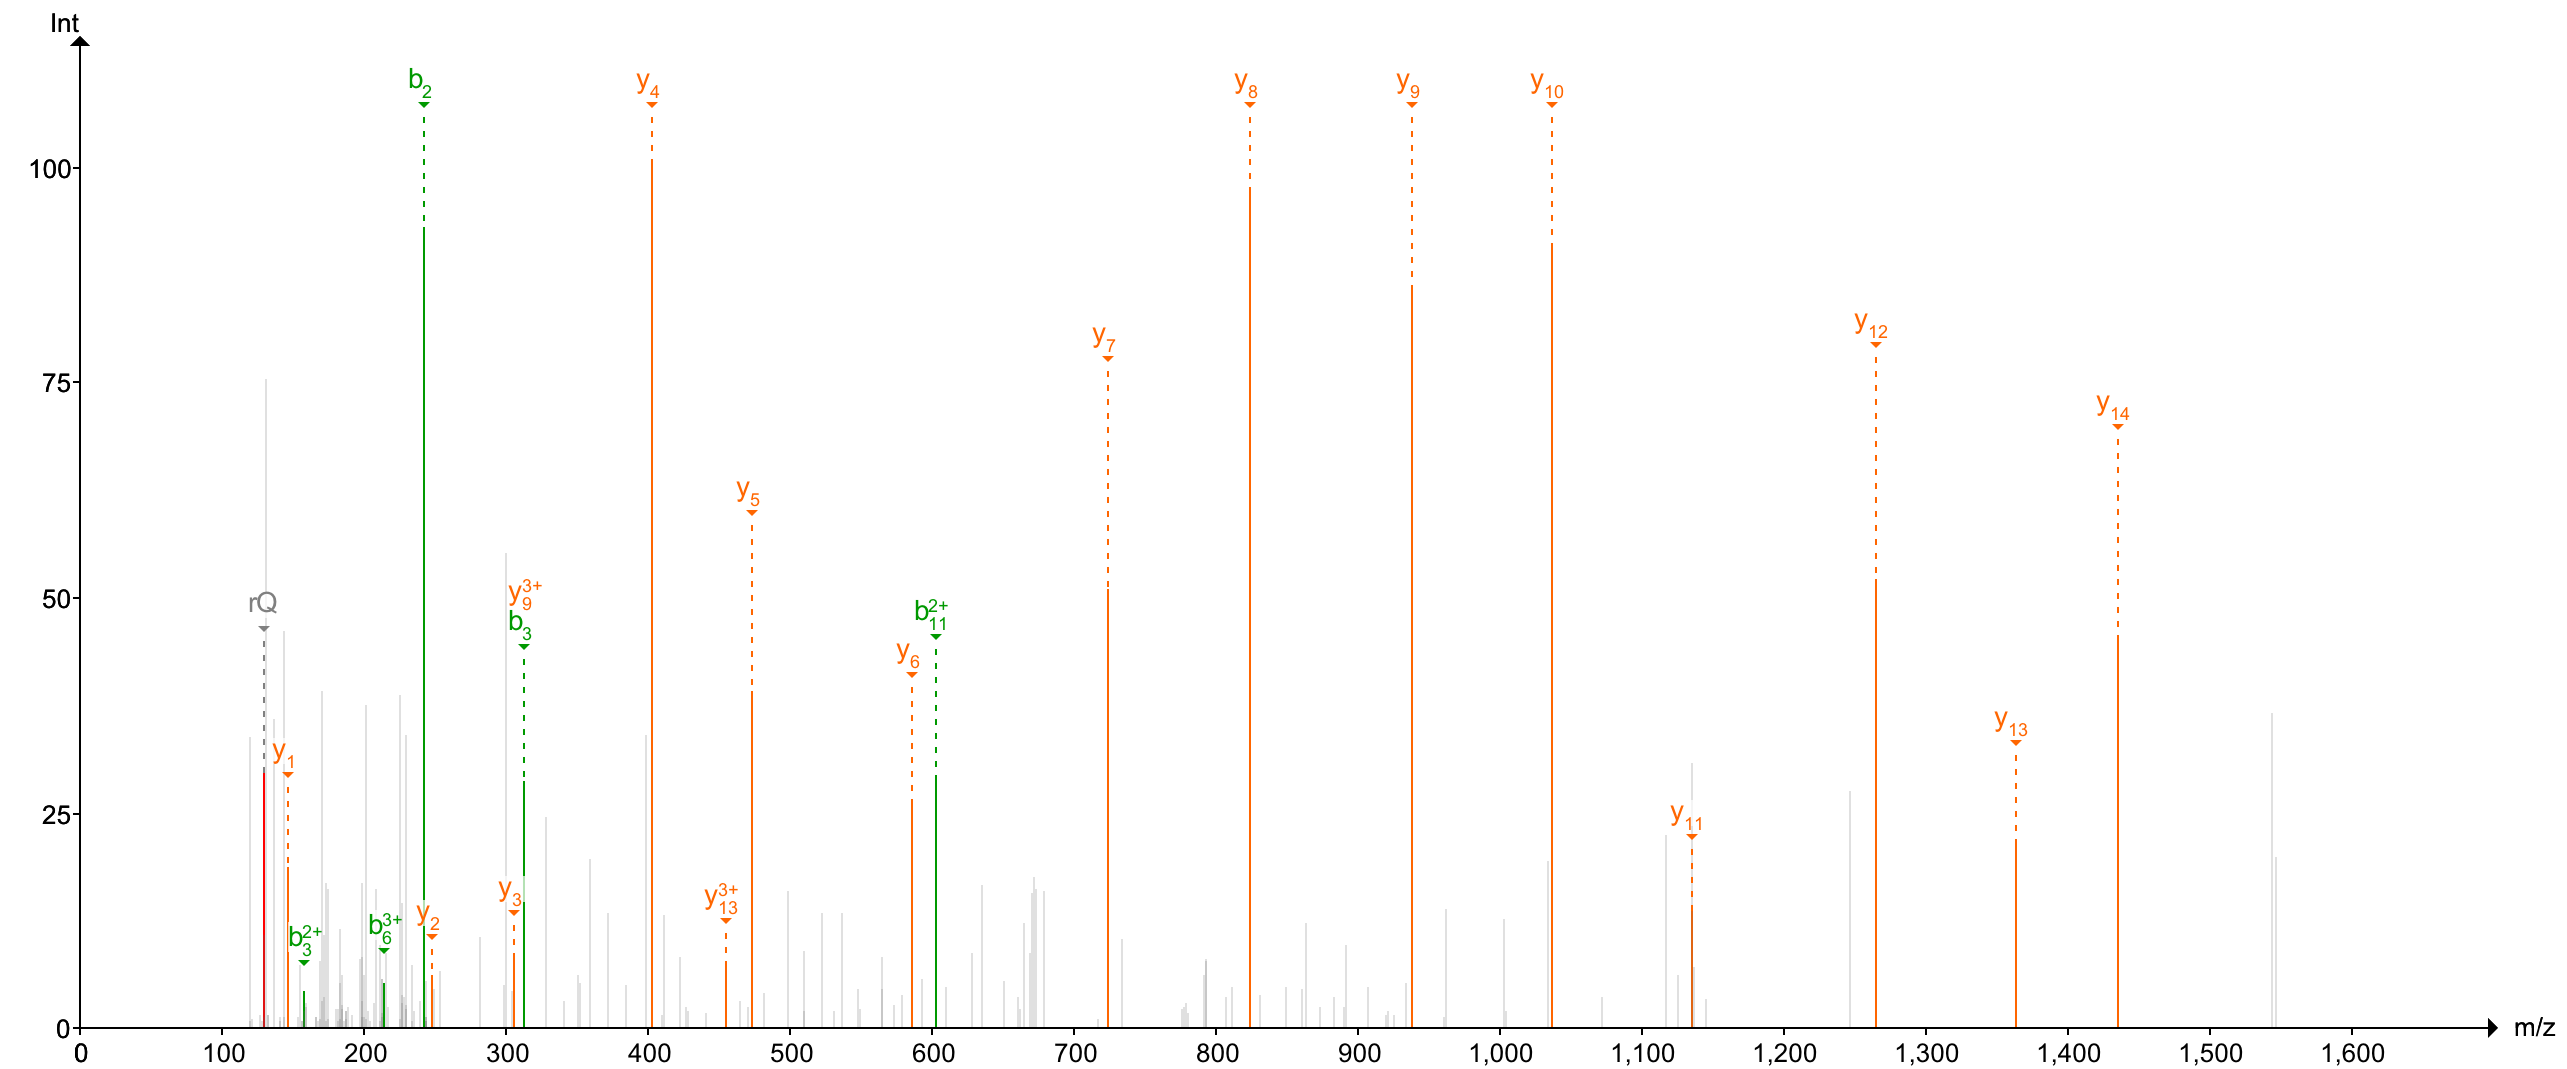

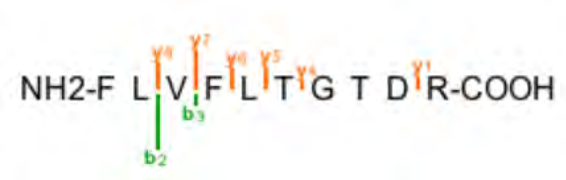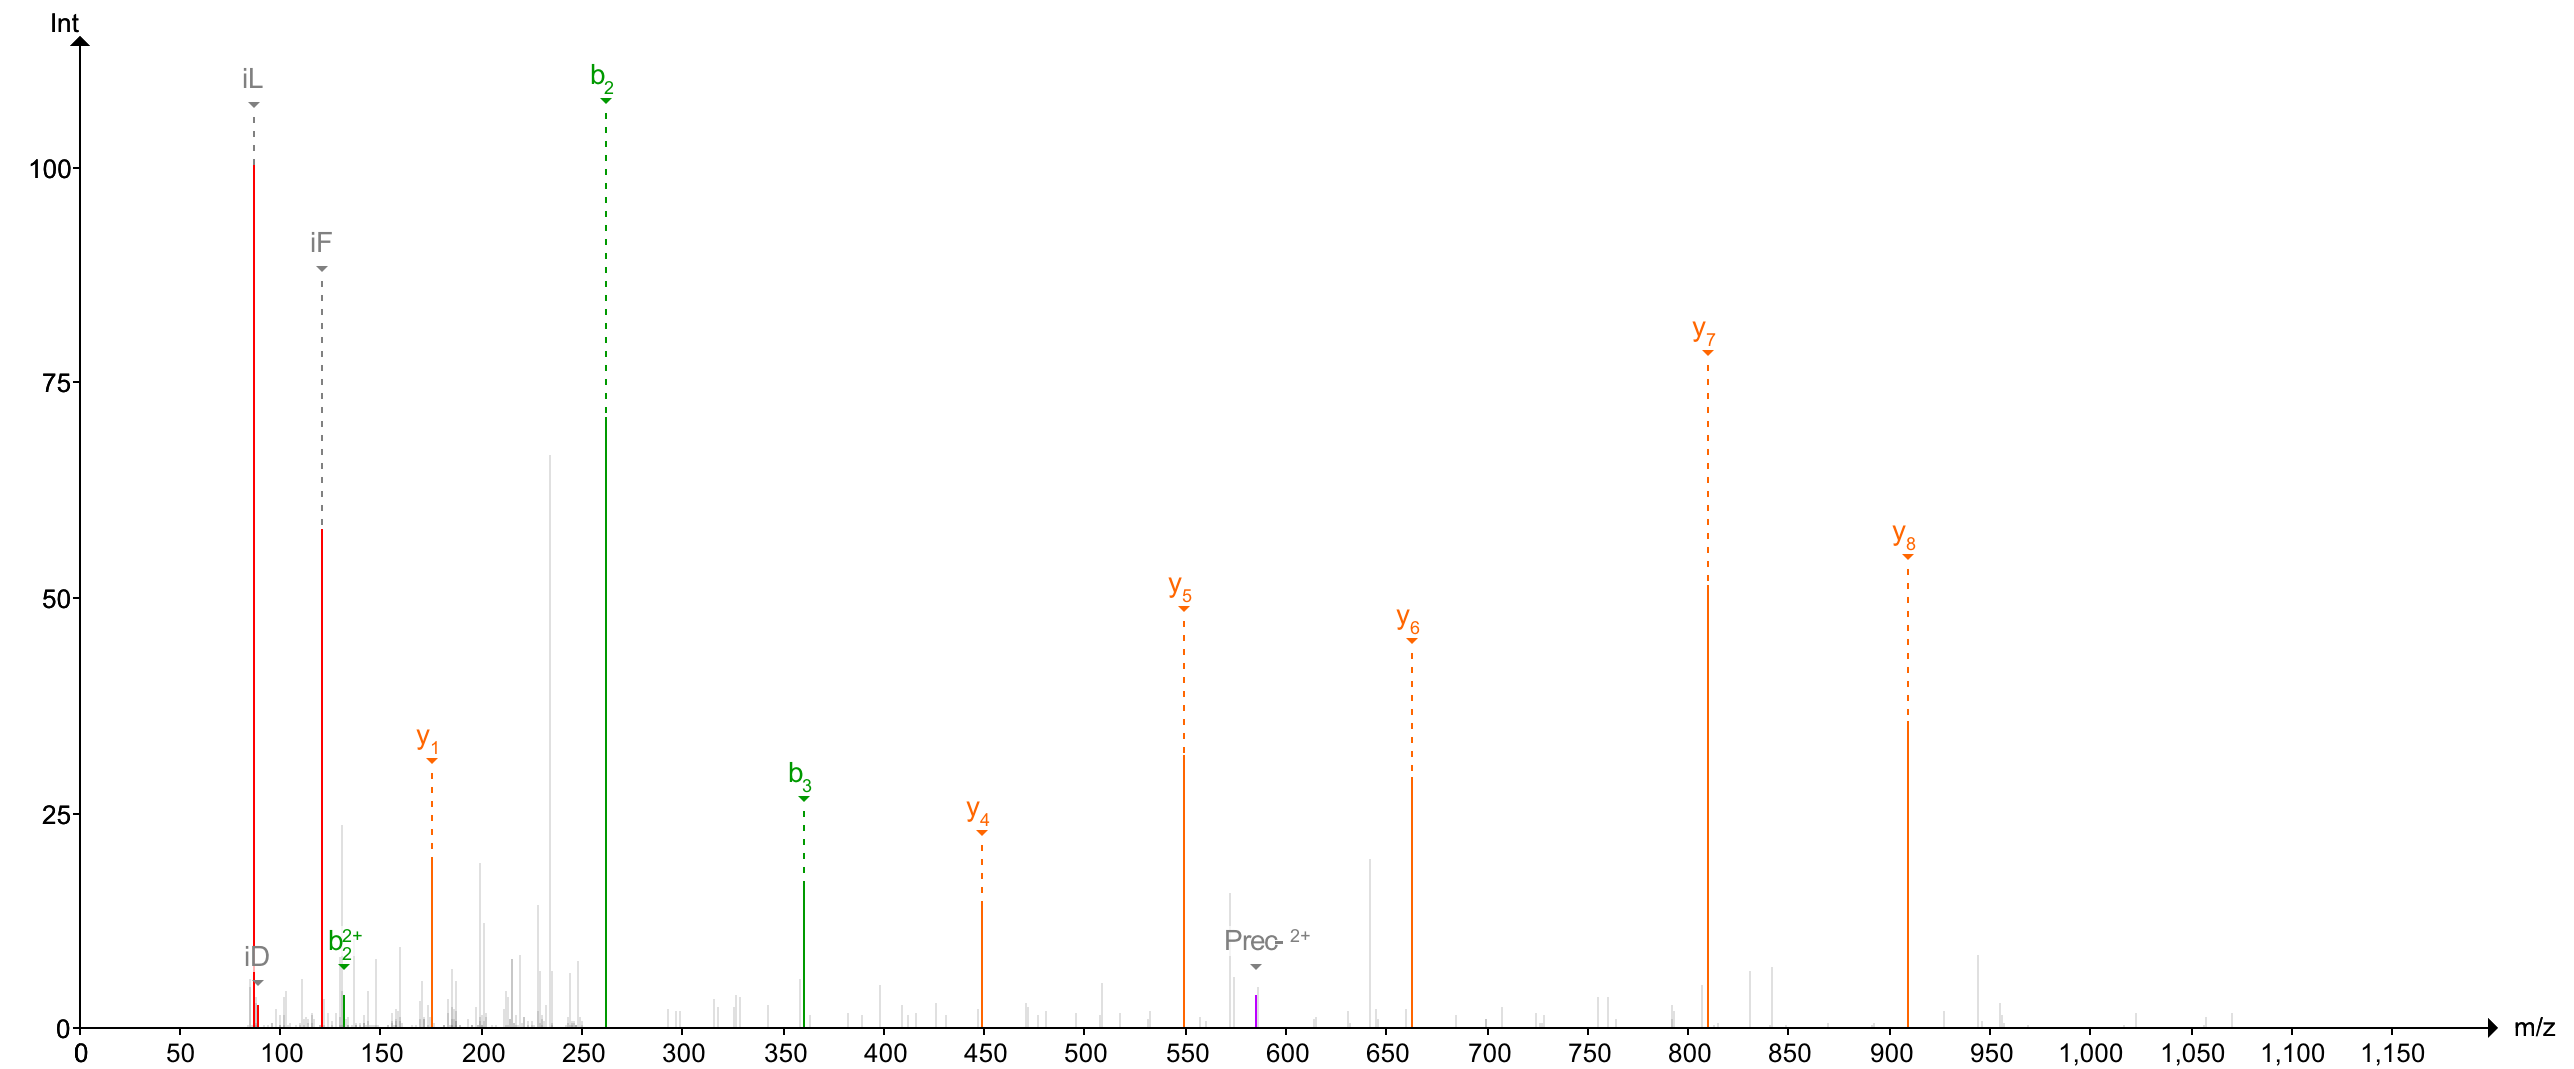

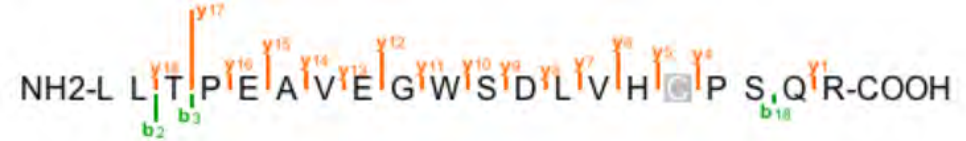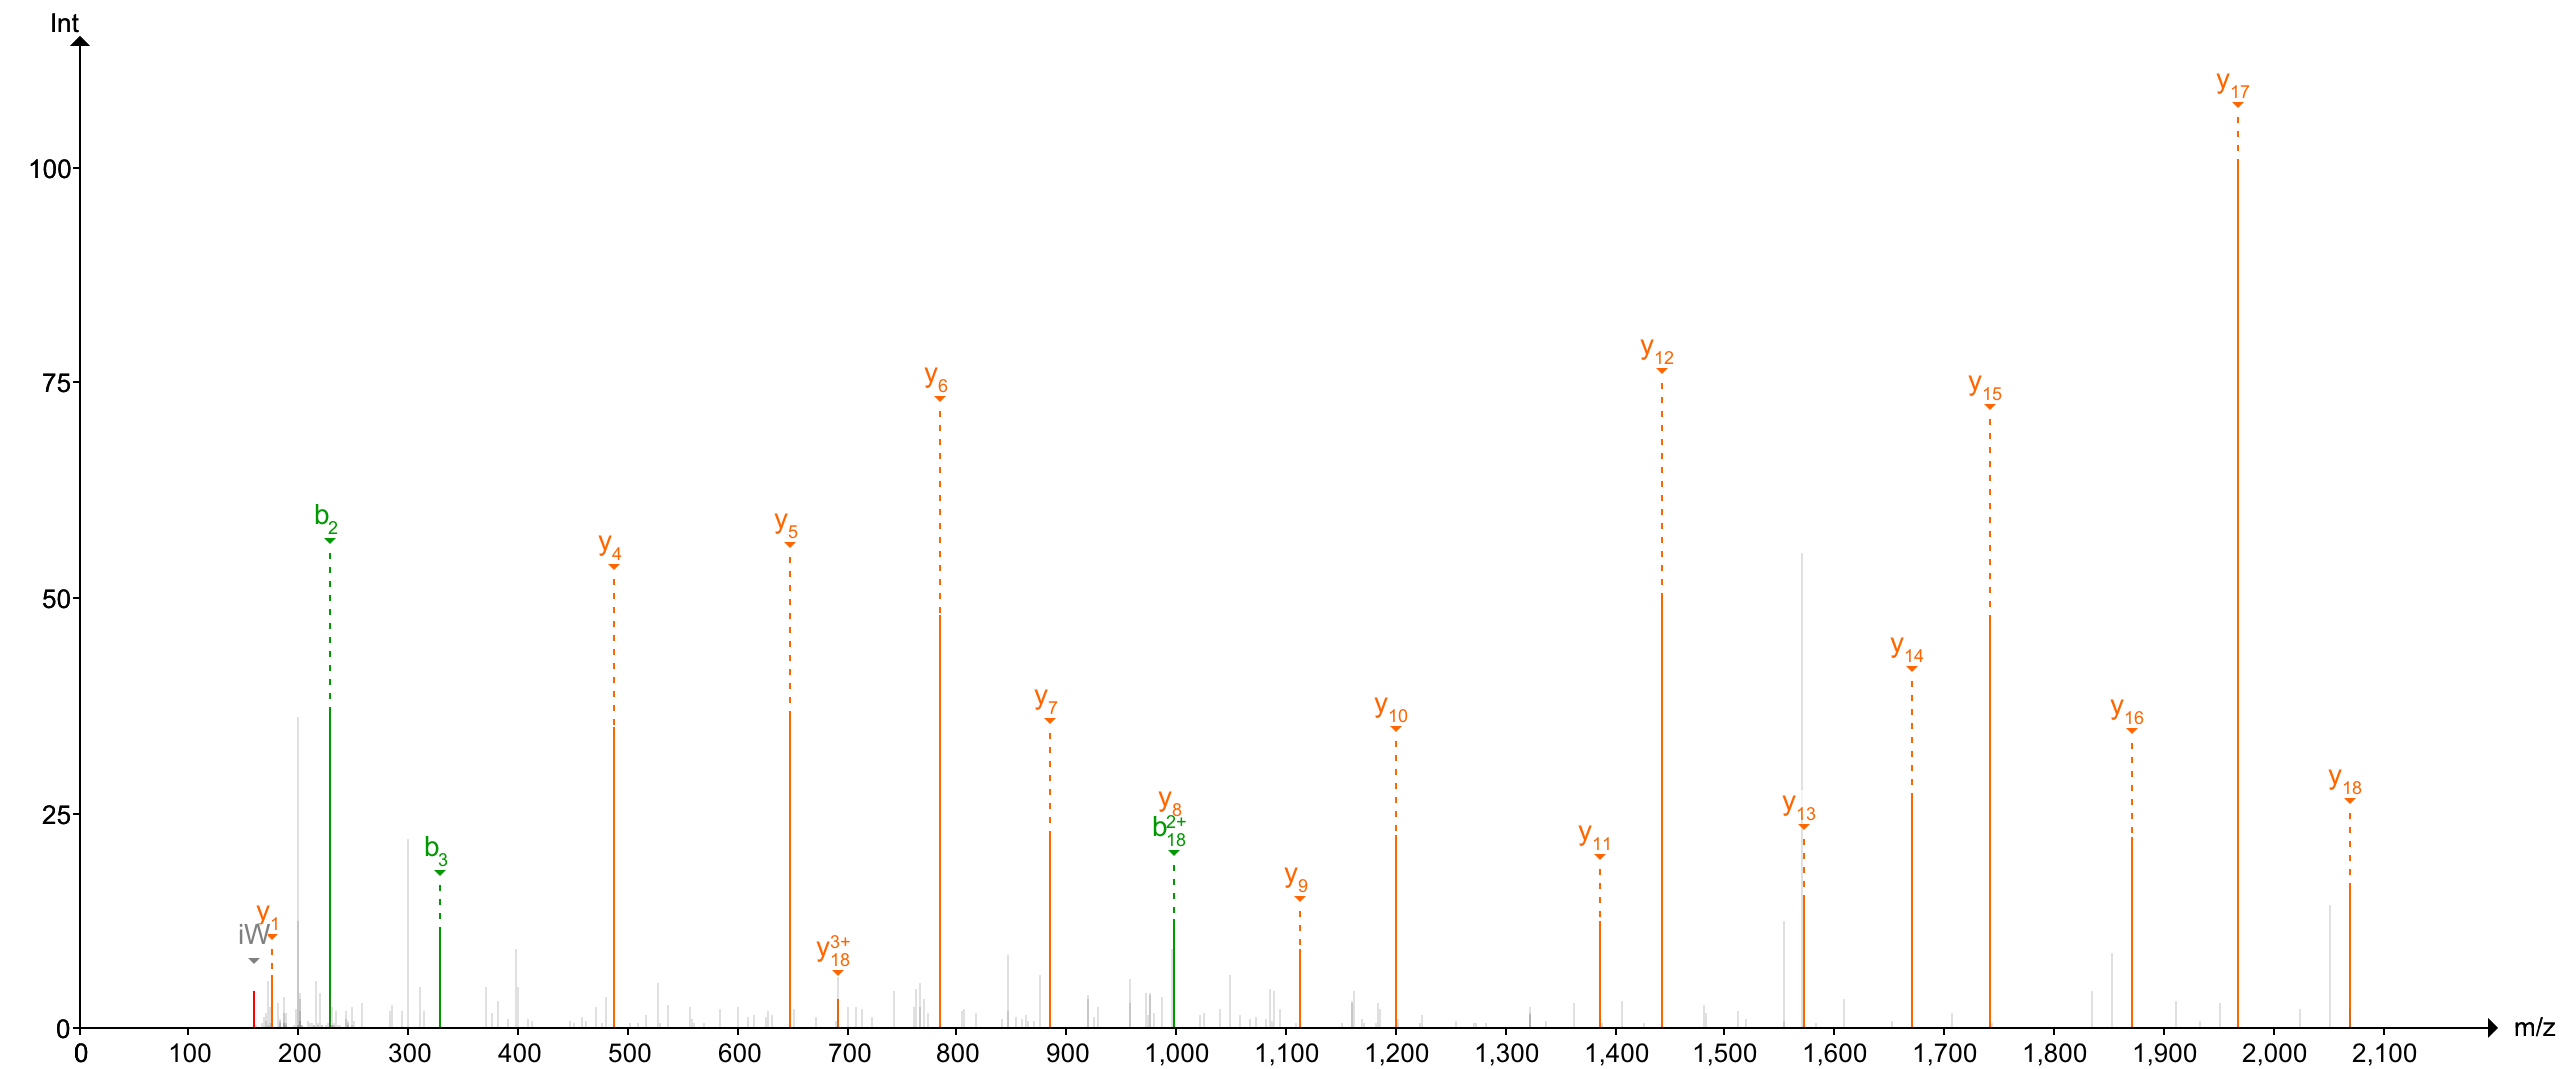

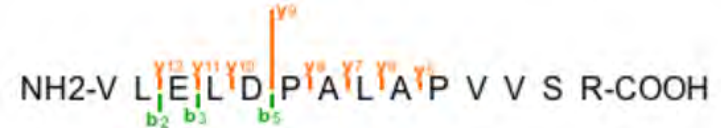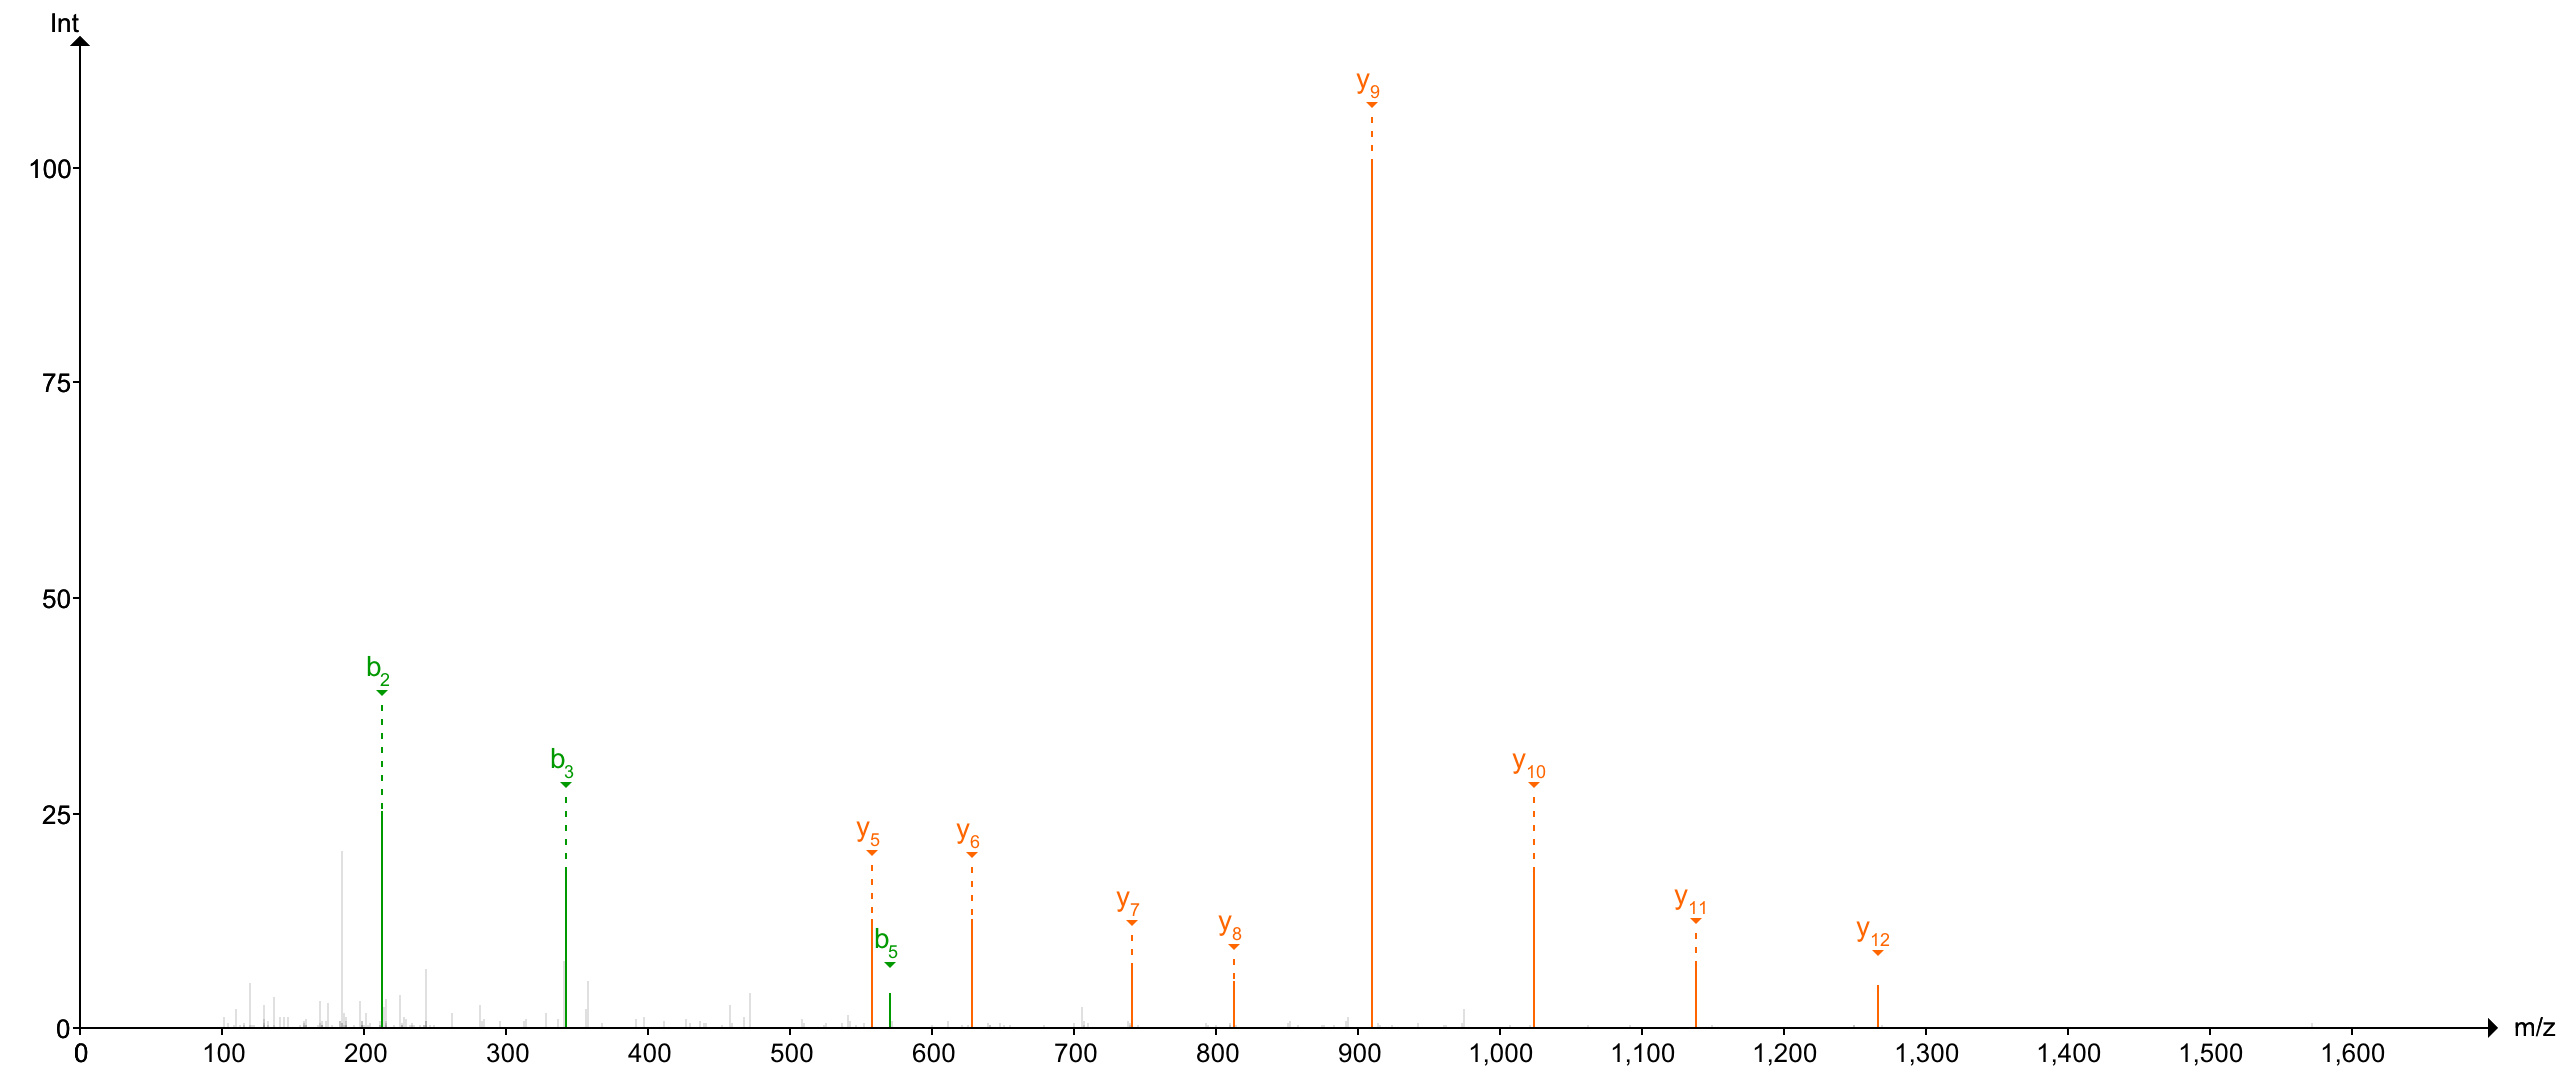

NH<sub>2</sub>-P L V V F G L P Y S G K-COOH

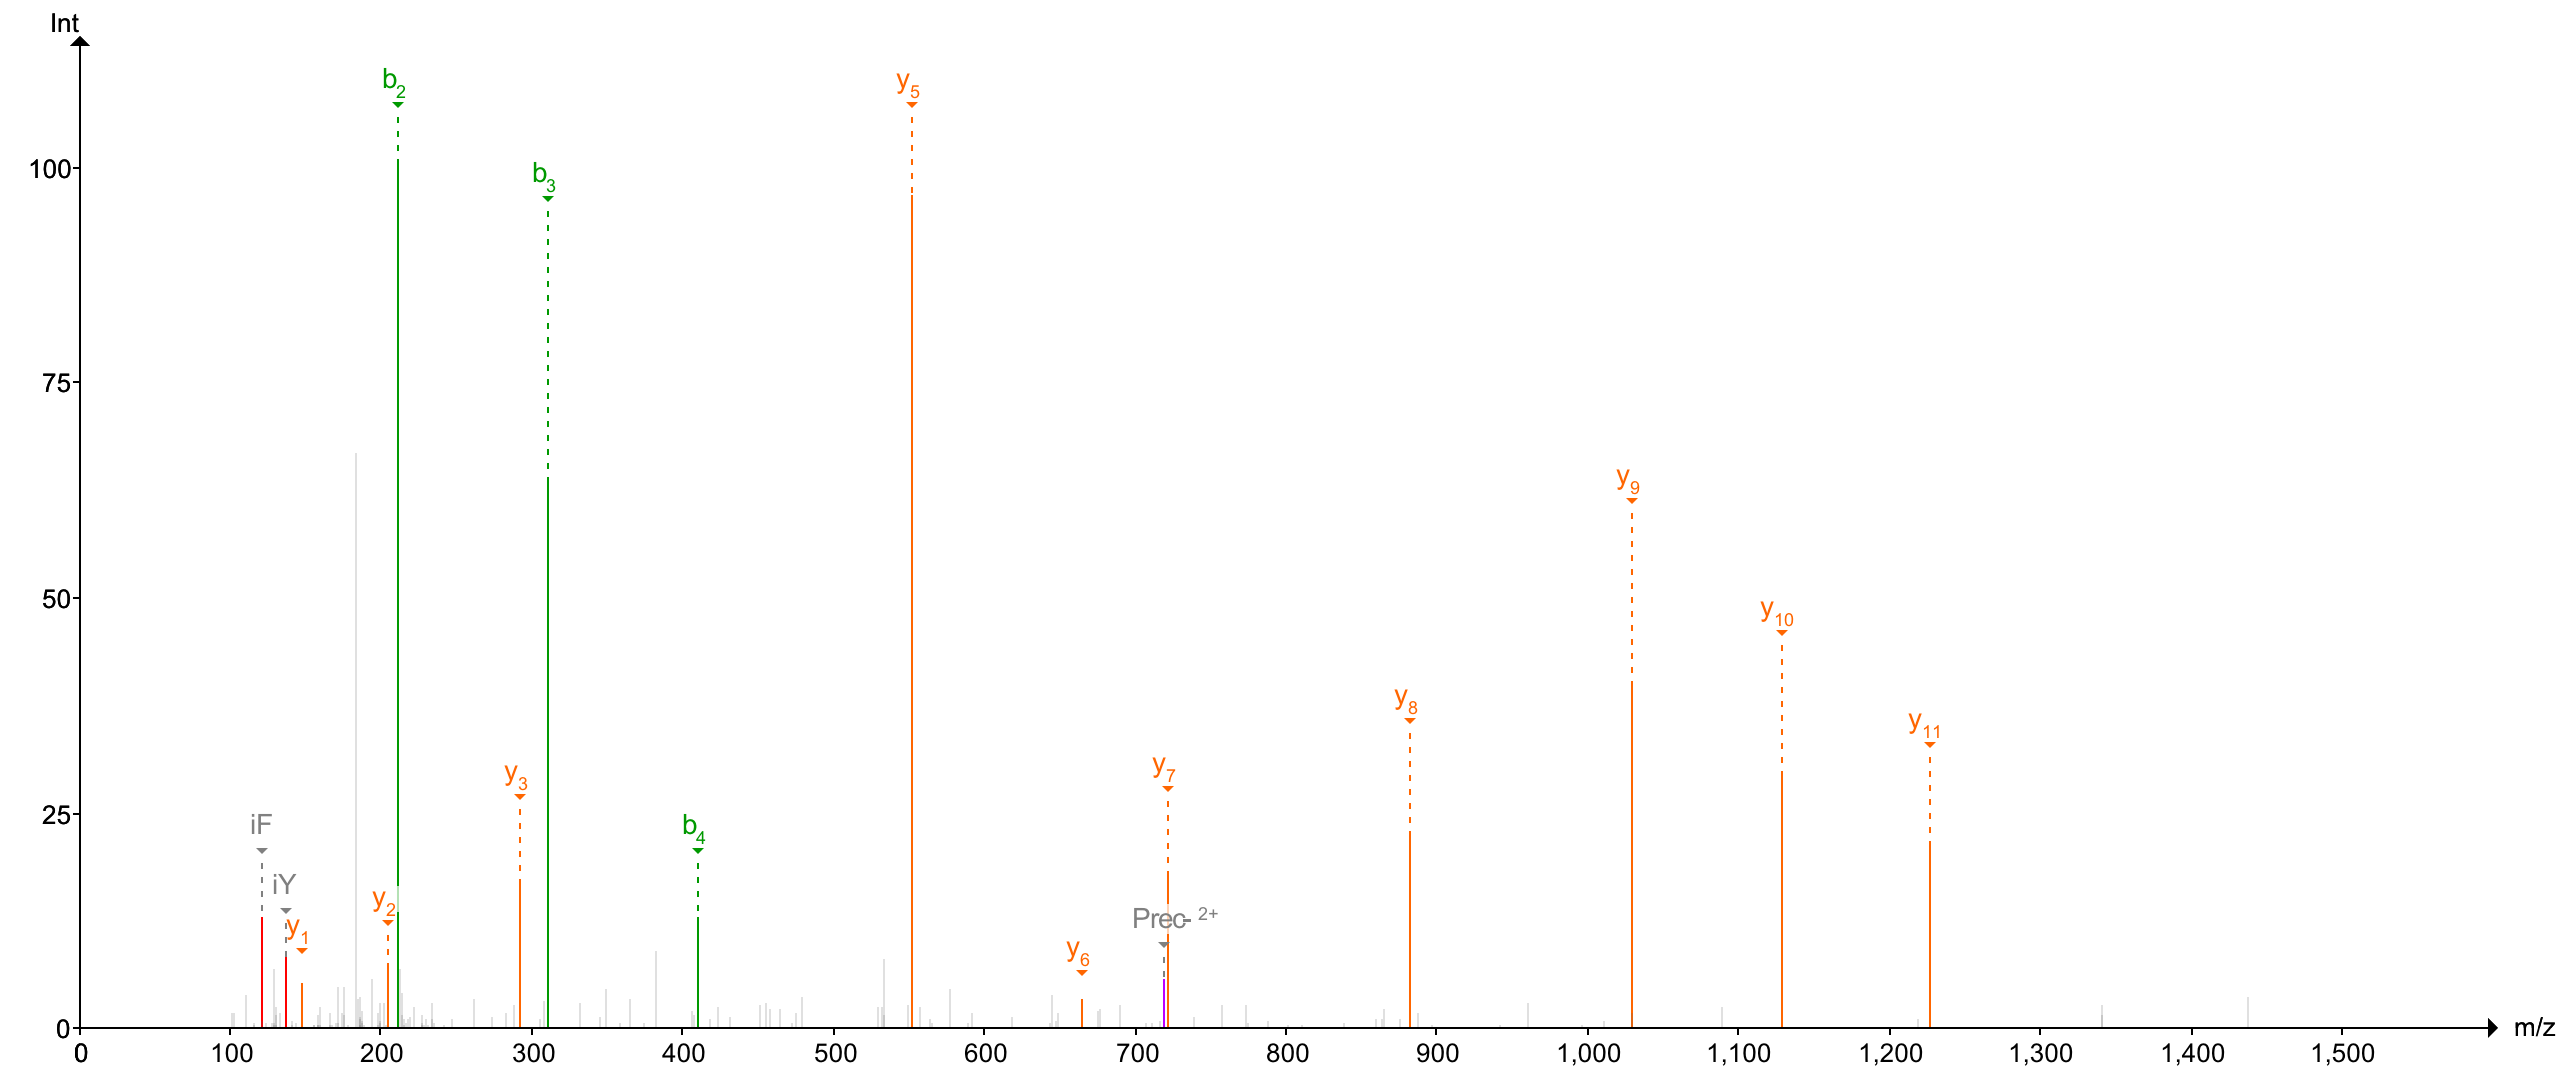

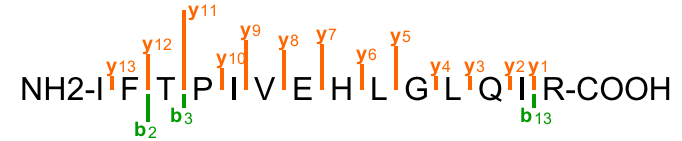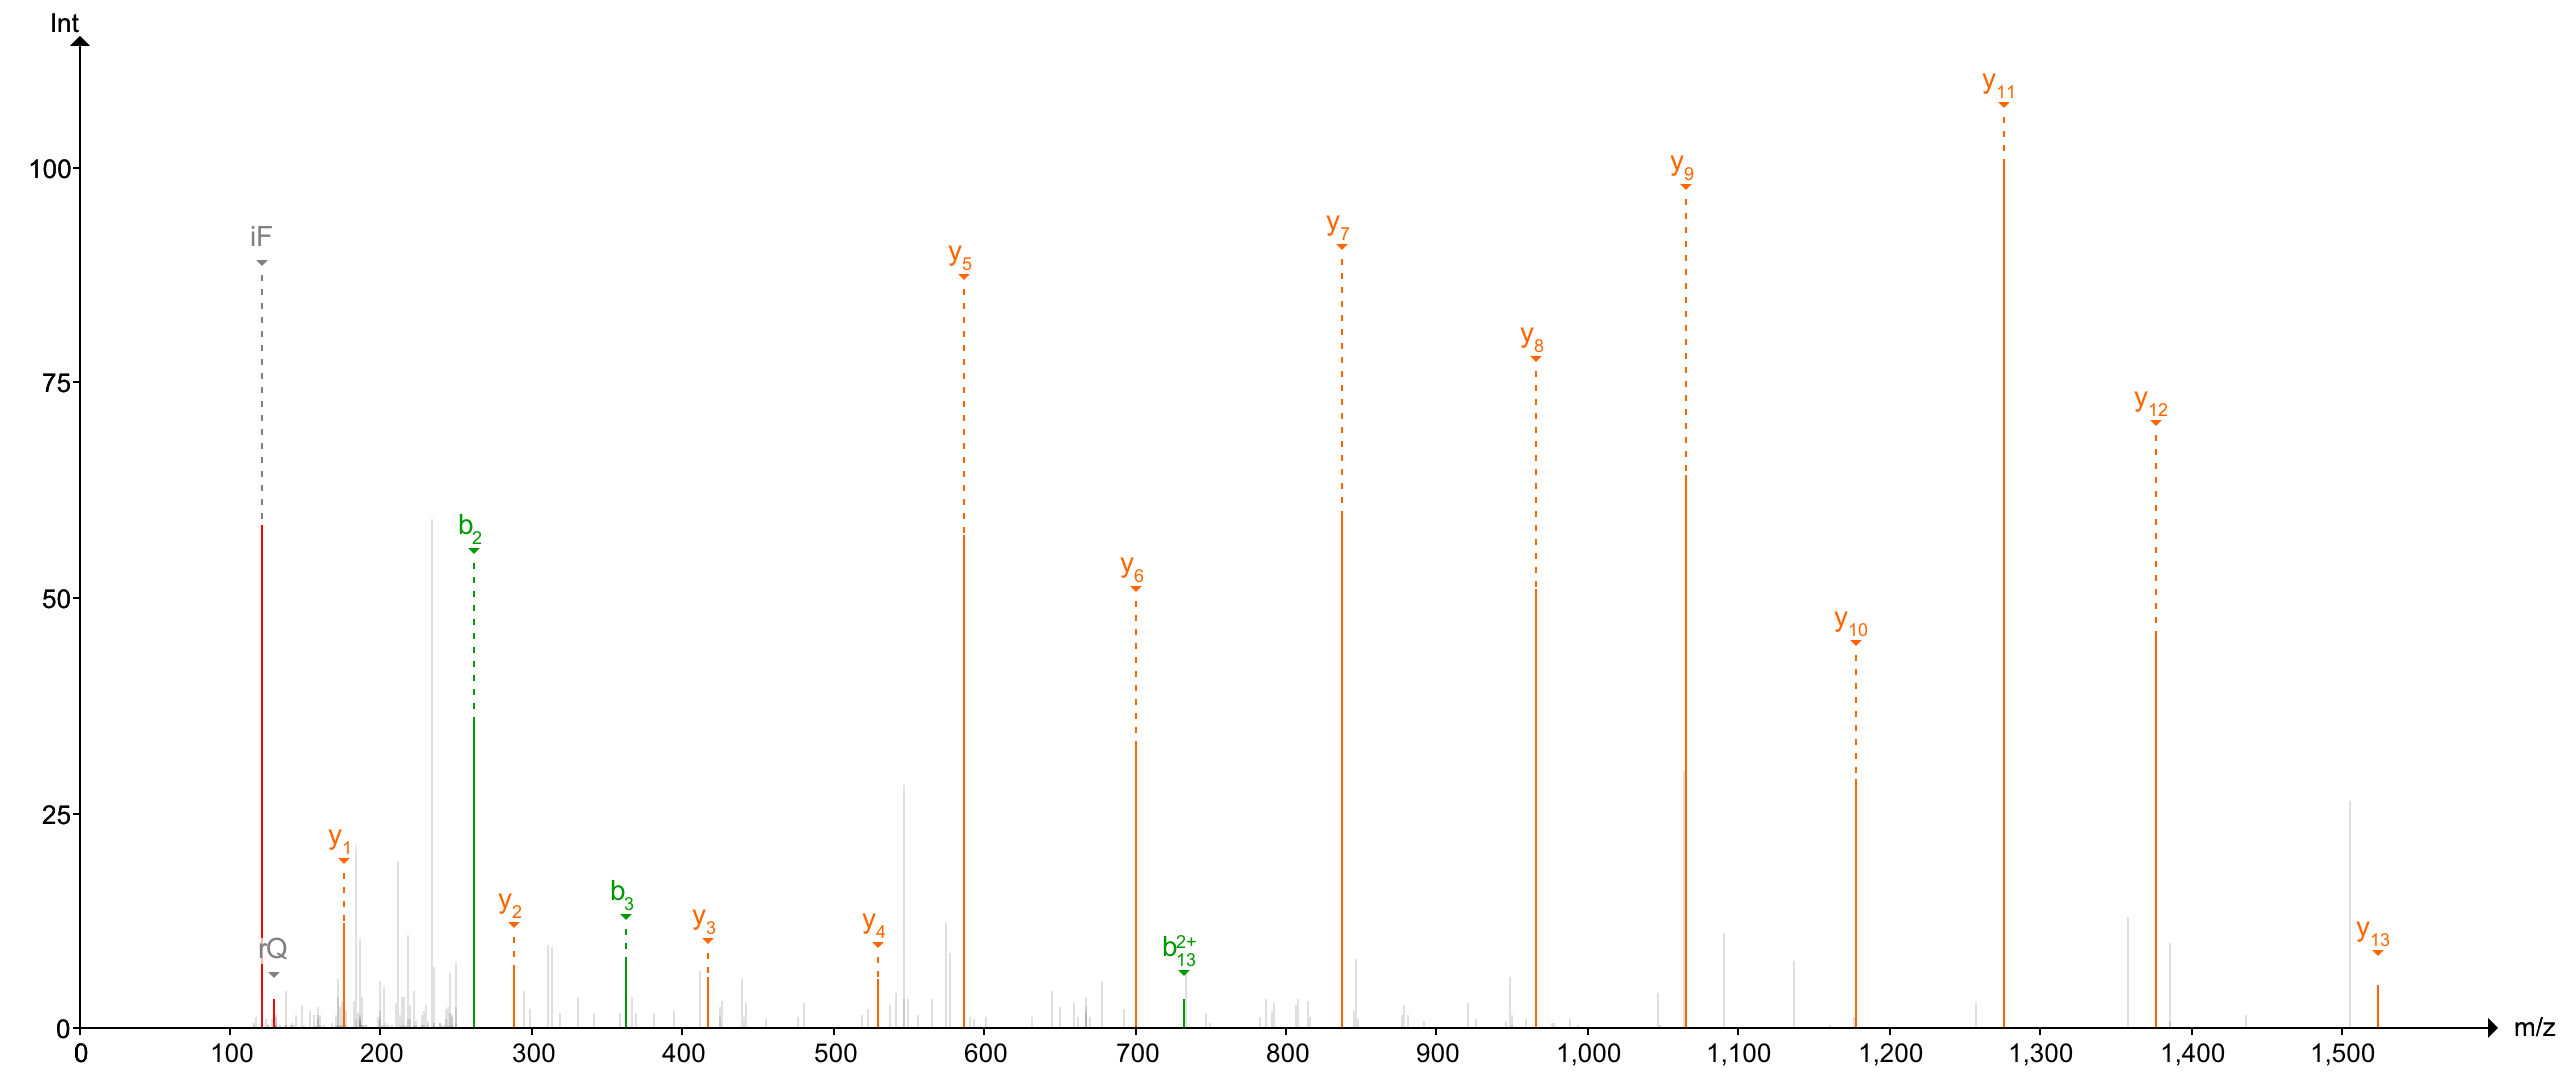

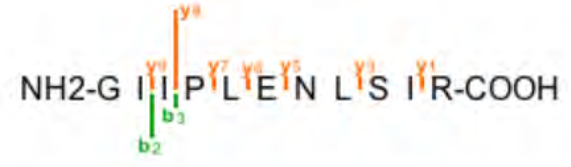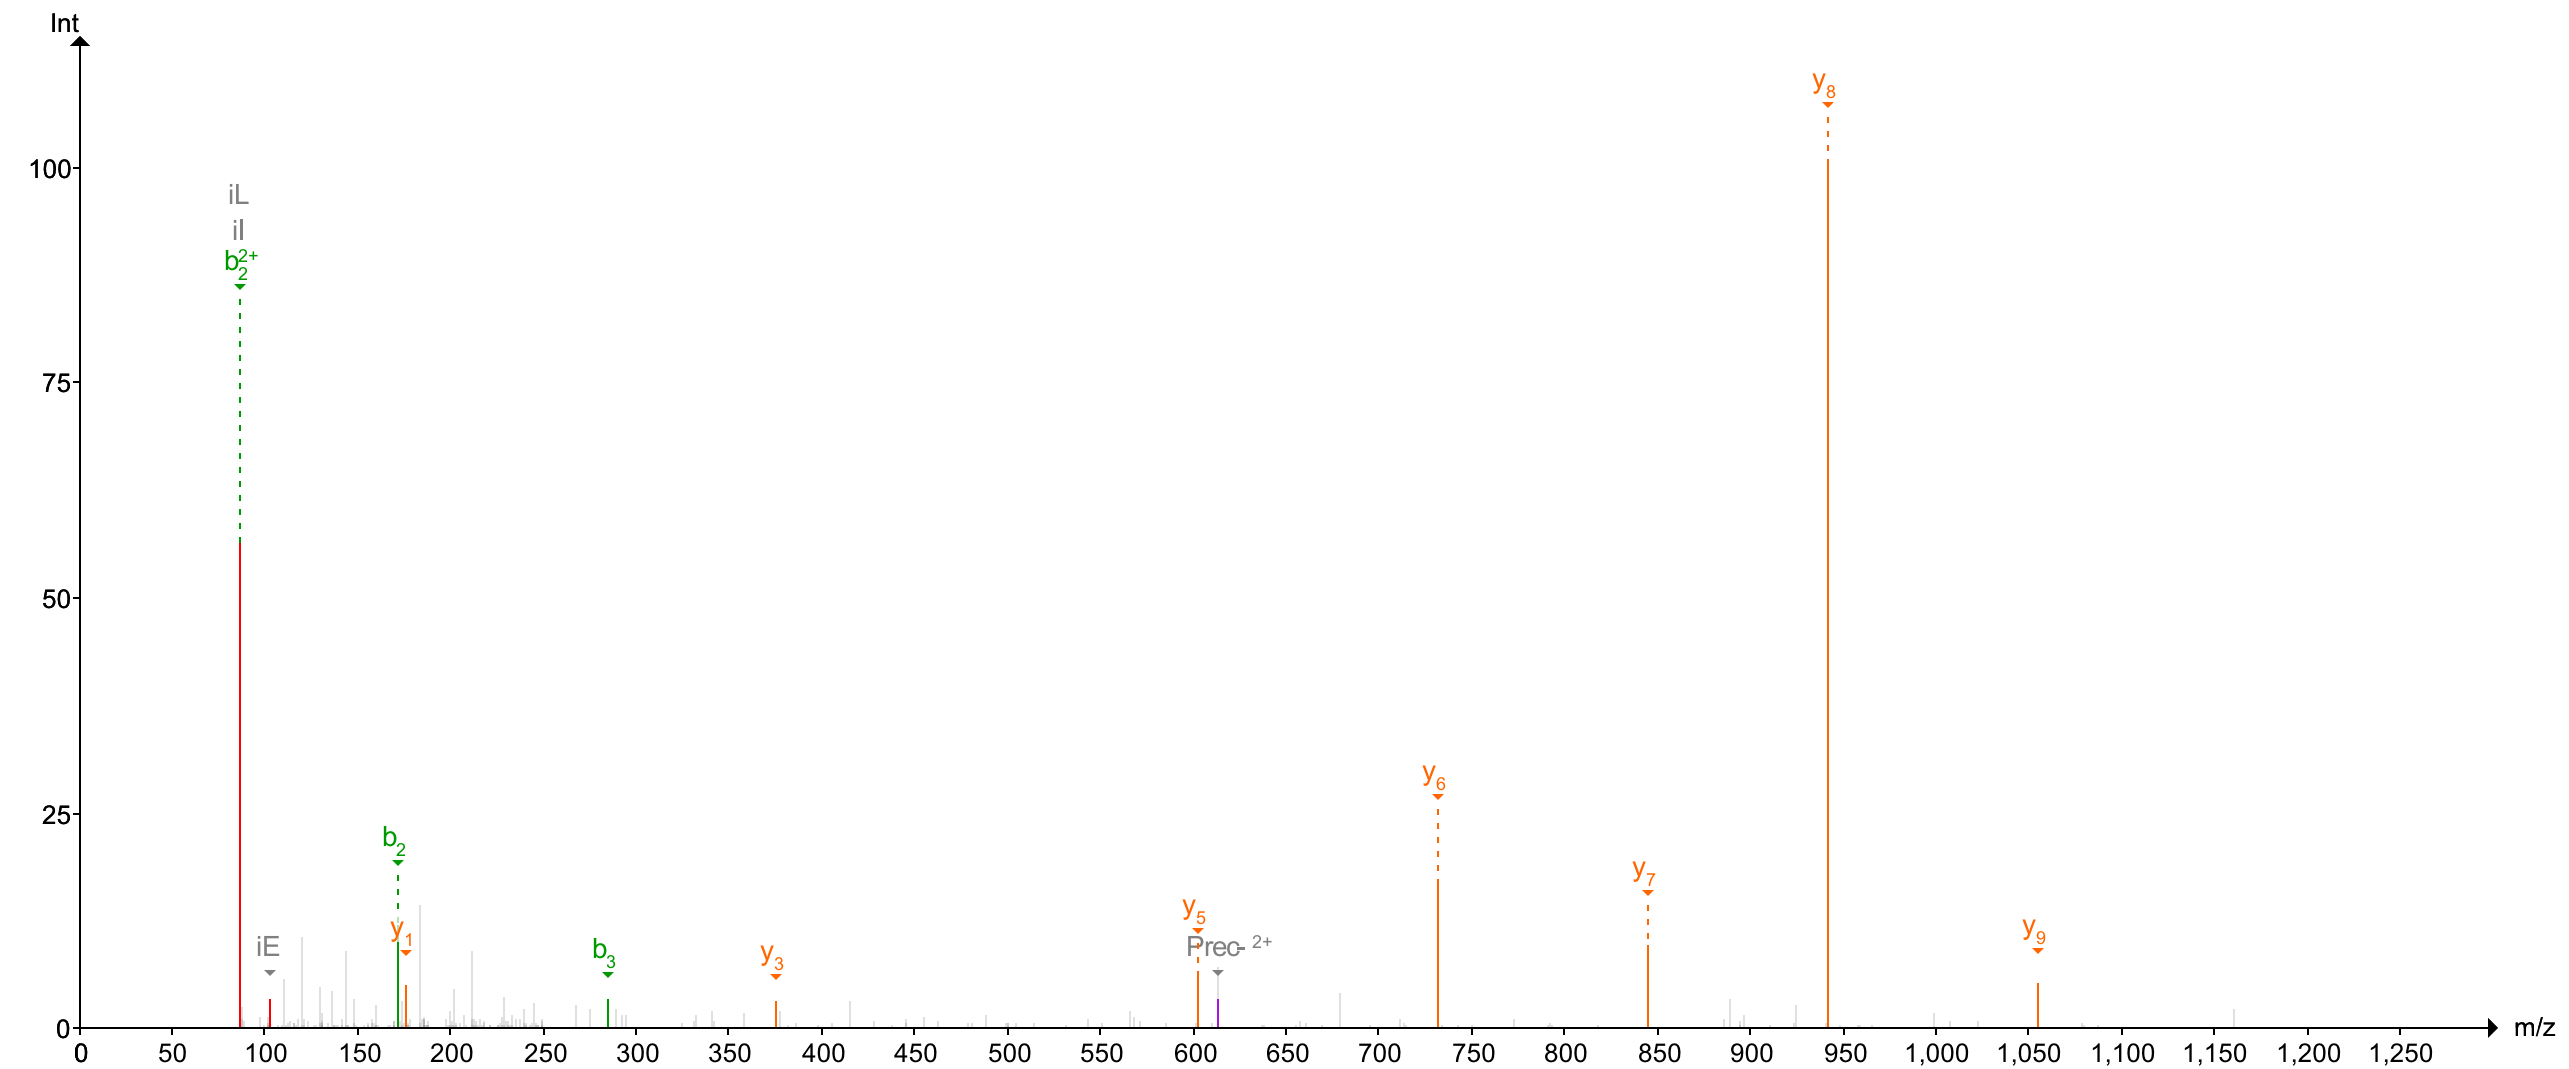

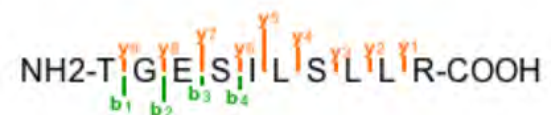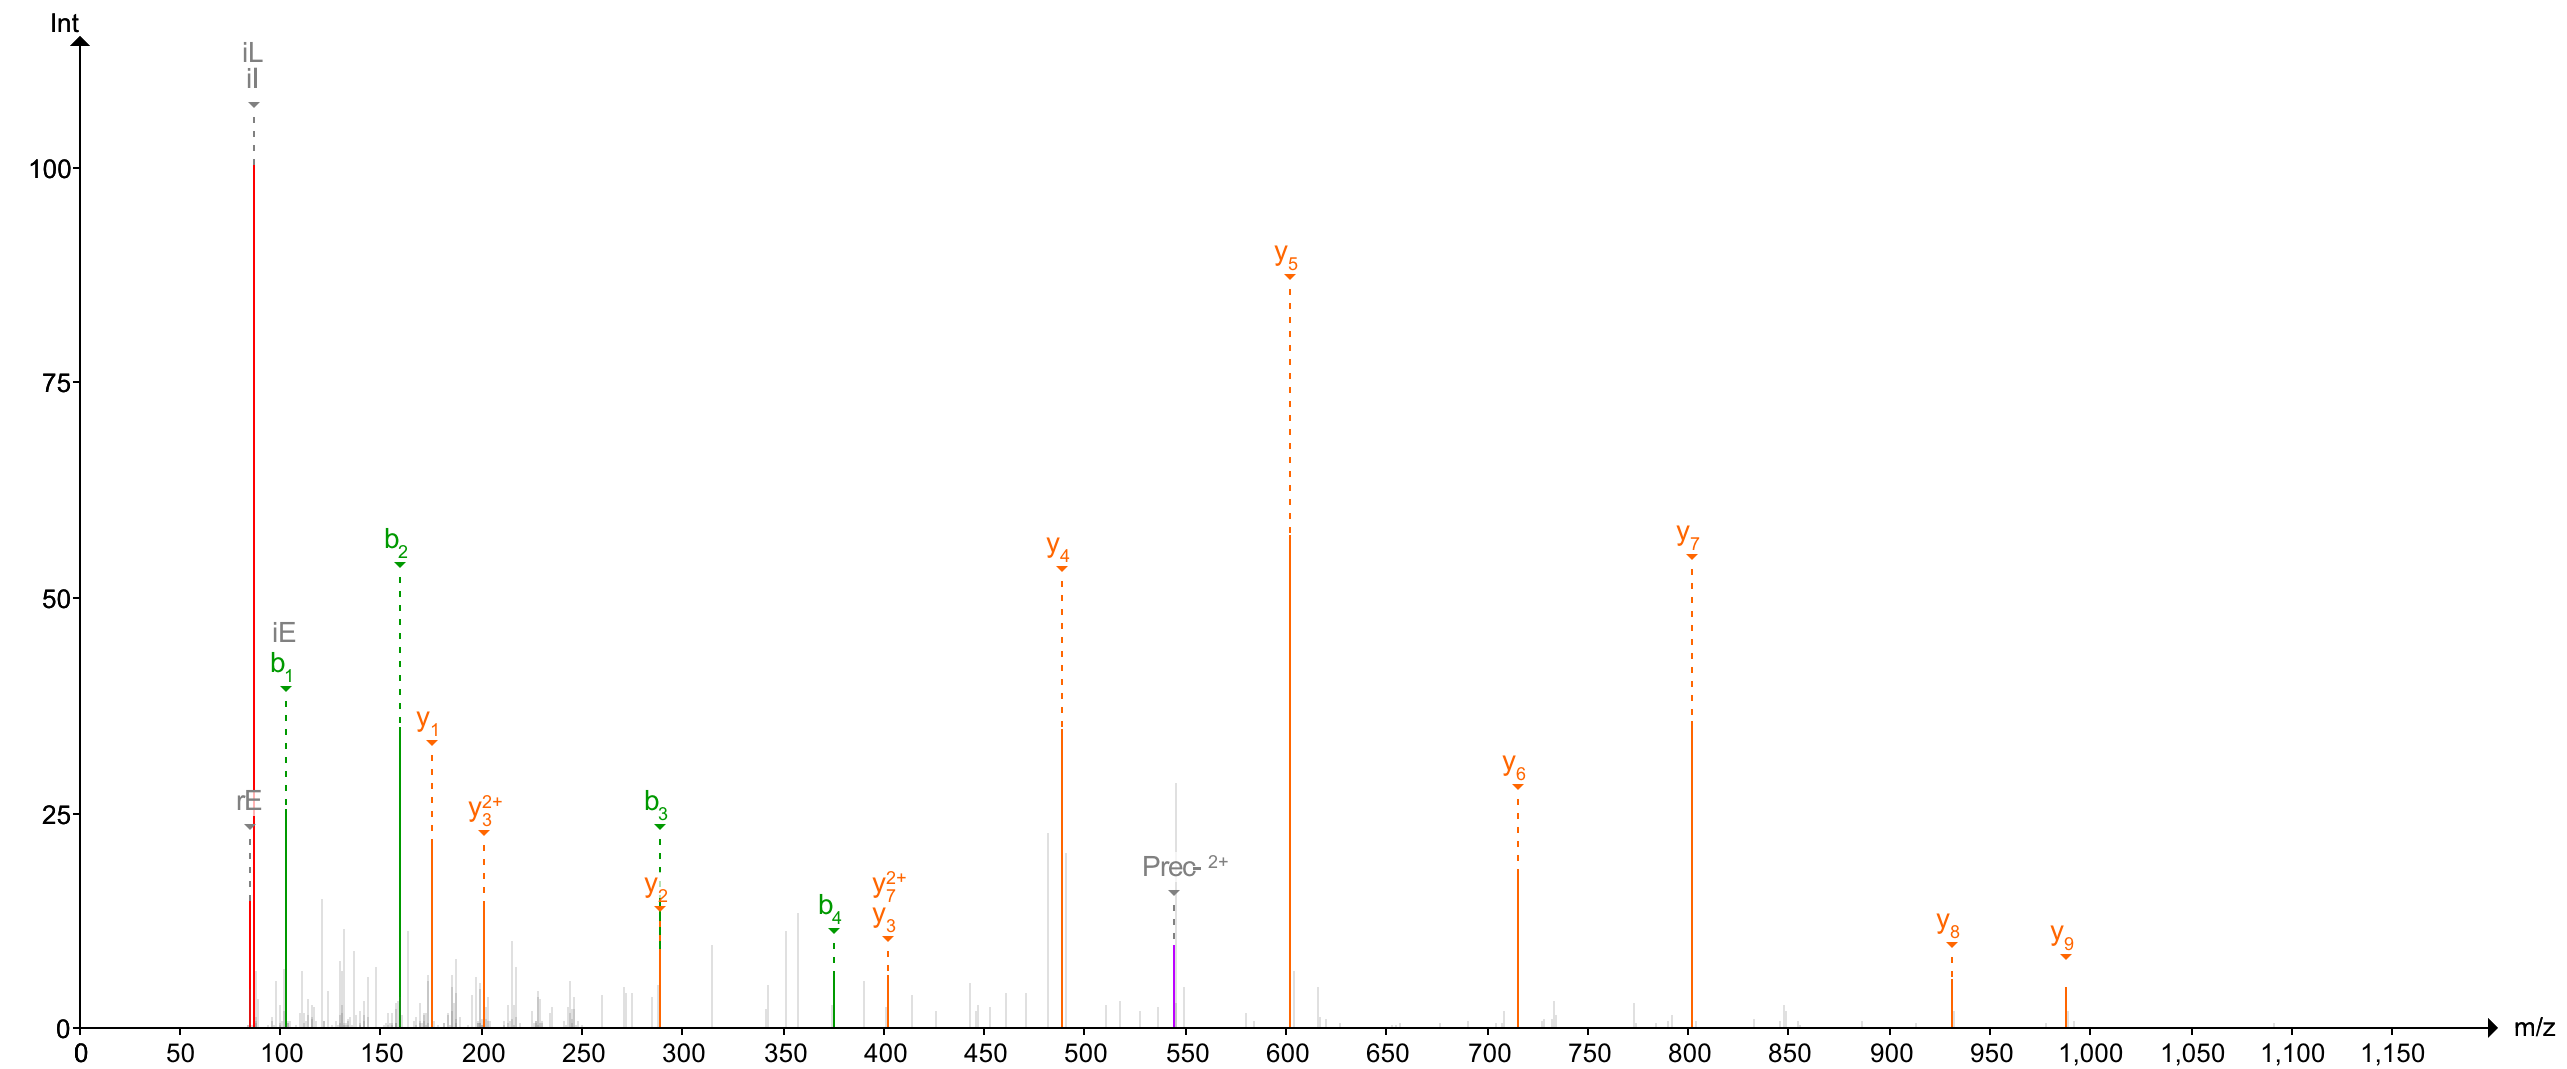



NH<sub>2</sub>-I<sup>y<sub>8</sub></sup>G<sup>y<sub>7</sub></sup>I<sup>y<sub>6</sub></sup>L<sup>y<sub>5</sub></sup>Q<sup>y<sub>4</sub></sup>L<sup>y<sub>3</sub></sup>L<sup>y<sub>2</sub></sup>I<sup>y<sub>1</sub></sup>R-COOH

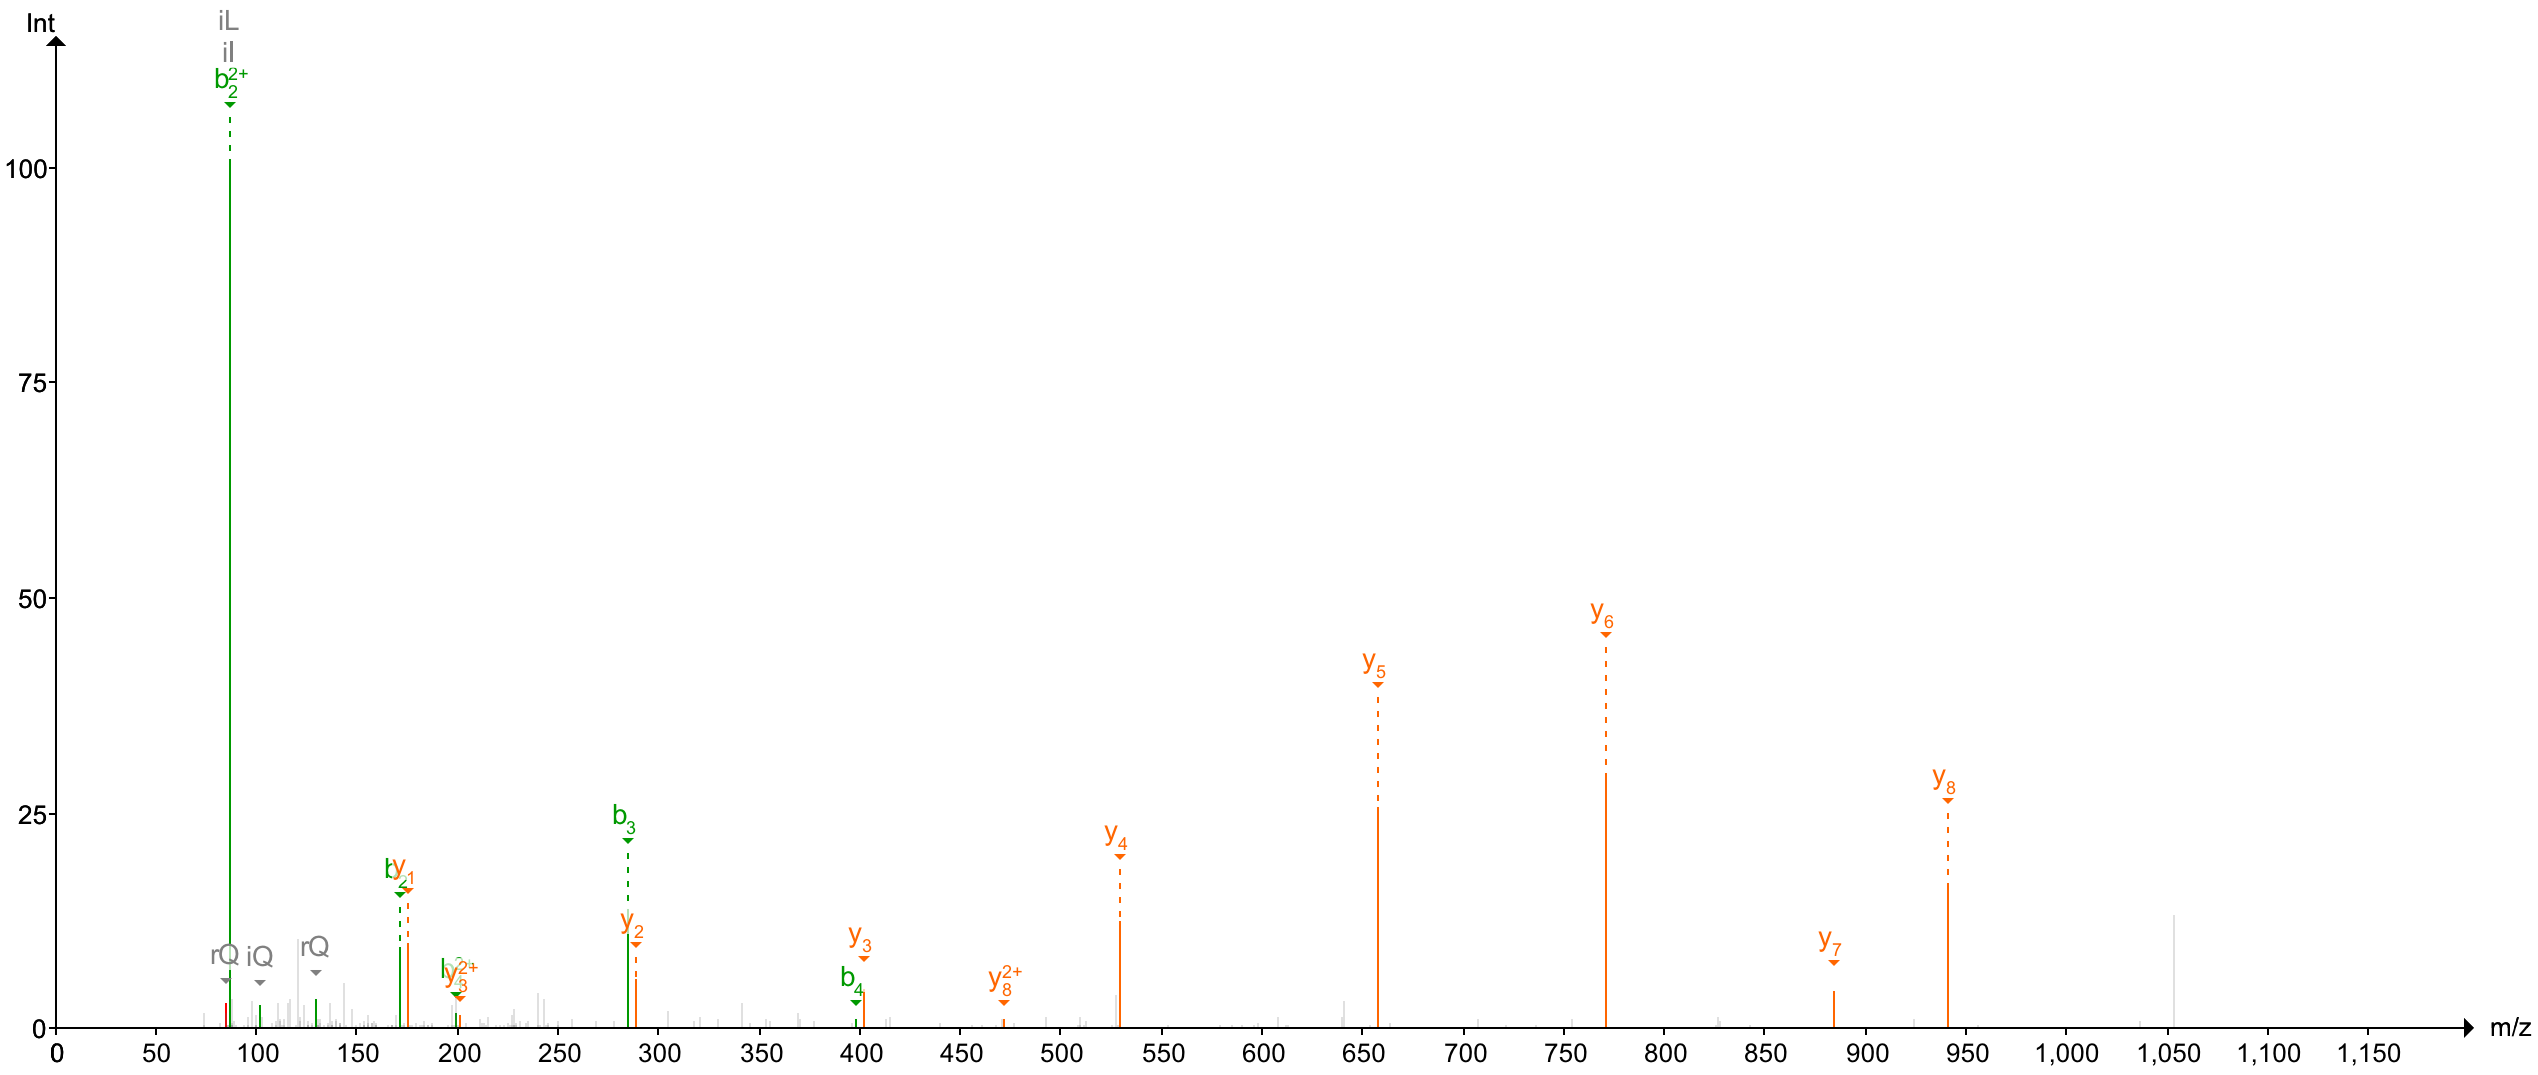

NH2-A V L L Q L L Y P E N S I E Q L E L I T T Q A T K-COOH

b<sub>2</sub> b<sub>3</sub> b<sub>4</sub> b<sub>5</sub> b<sub>6</sub> y<sub>16</sub> y<sub>18</sub> y<sub>17</sub>

y<sub>14</sub> y<sub>13</sub> y<sub>12</sub> y<sub>11</sub> y<sub>10</sub> y<sub>9</sub> y<sub>8</sub> y<sub>7</sub> y<sub>6</sub> y<sub>5</sub> y<sub>4</sub> y<sub>3</sub> y<sub>2</sub> b<sub>10</sub>

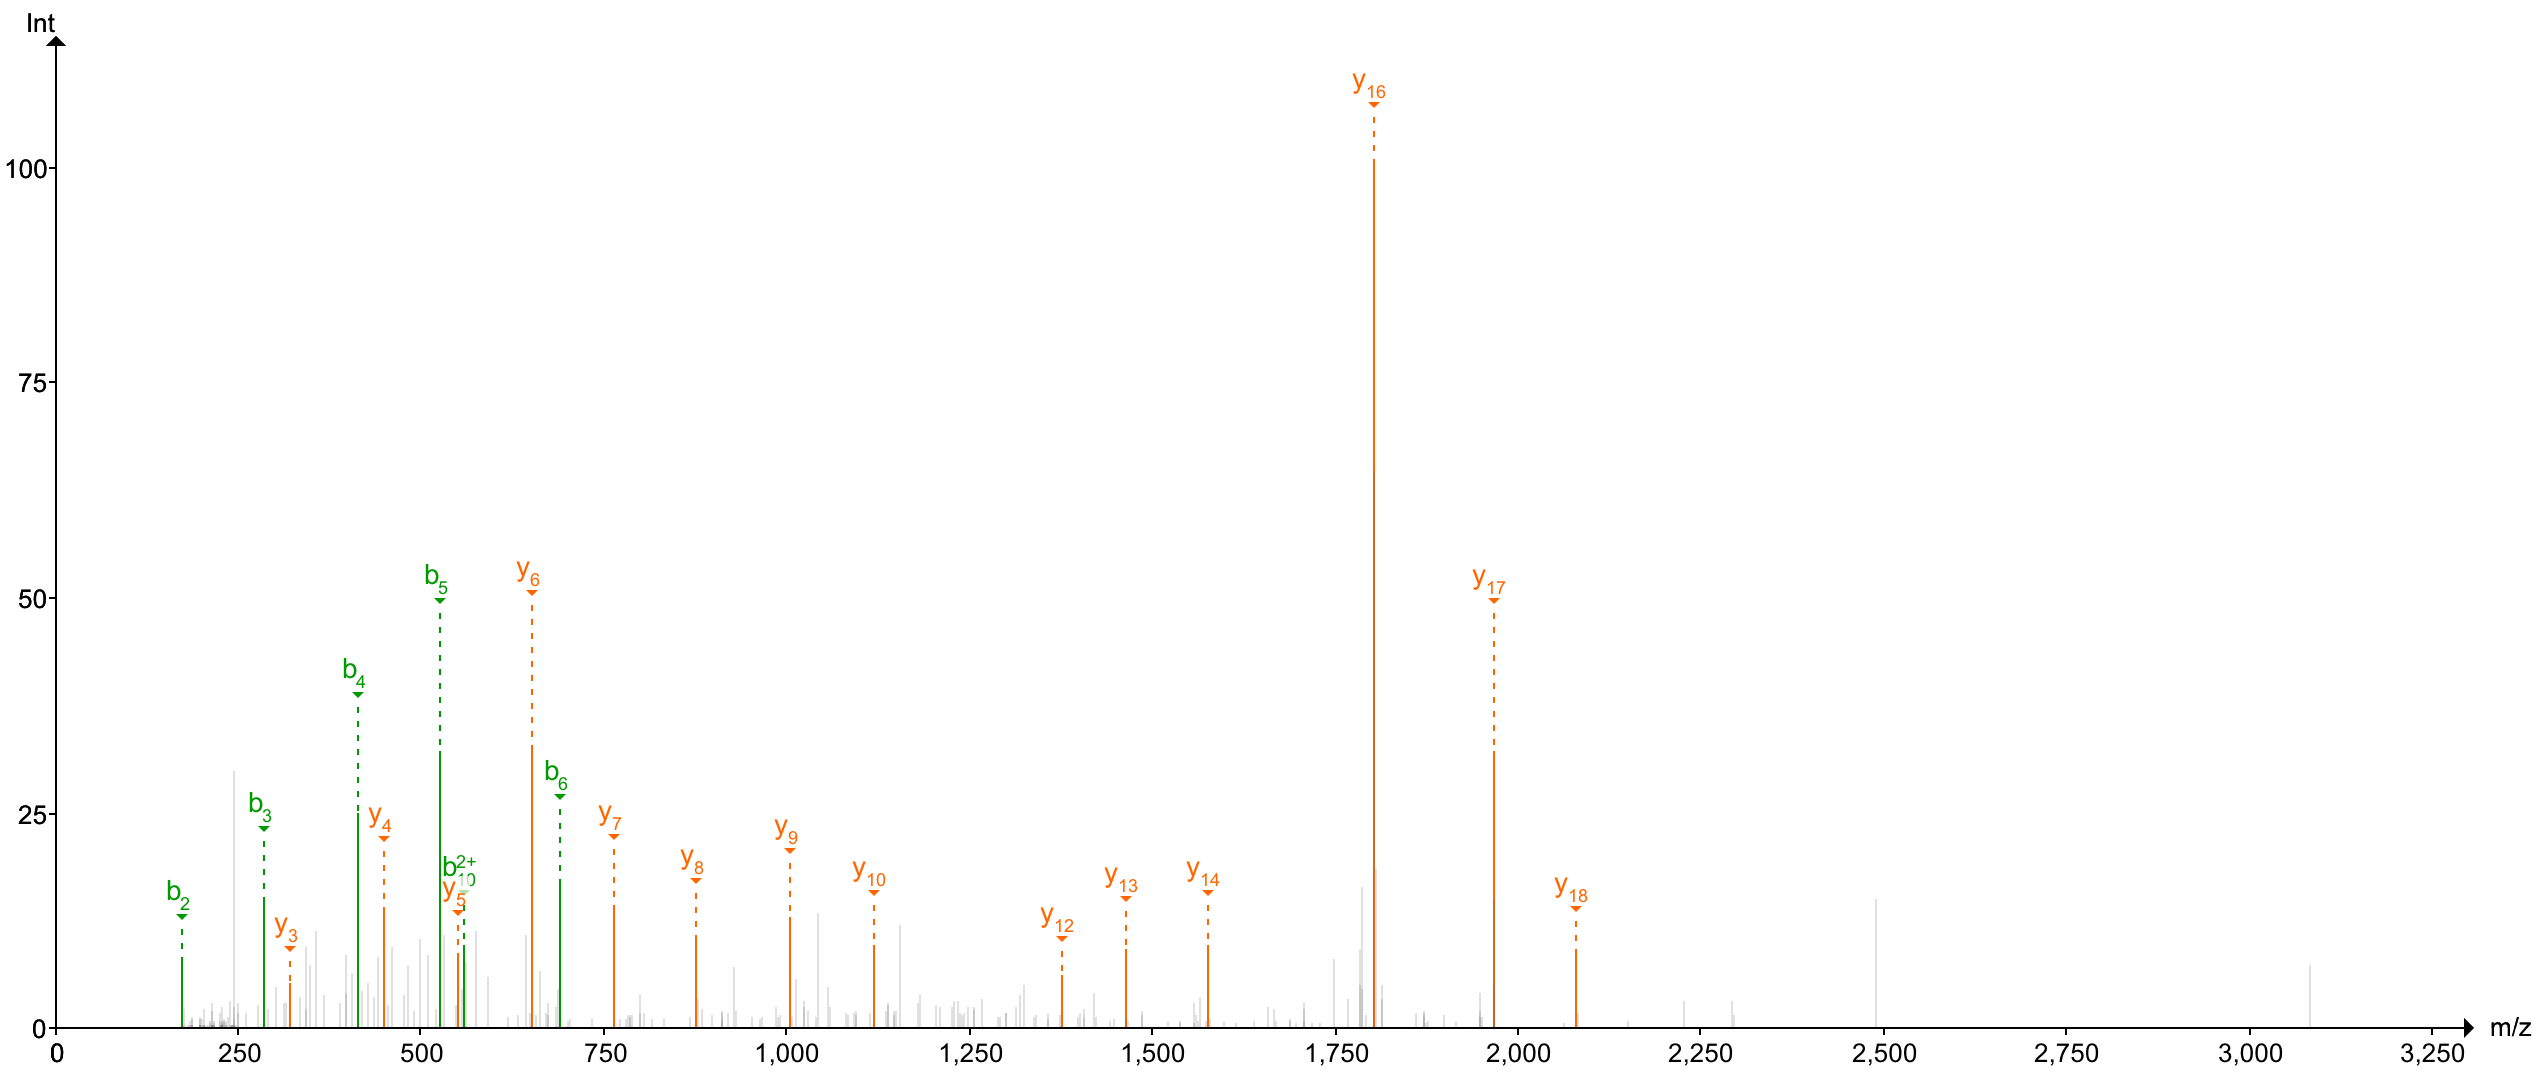

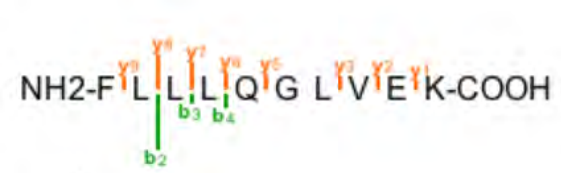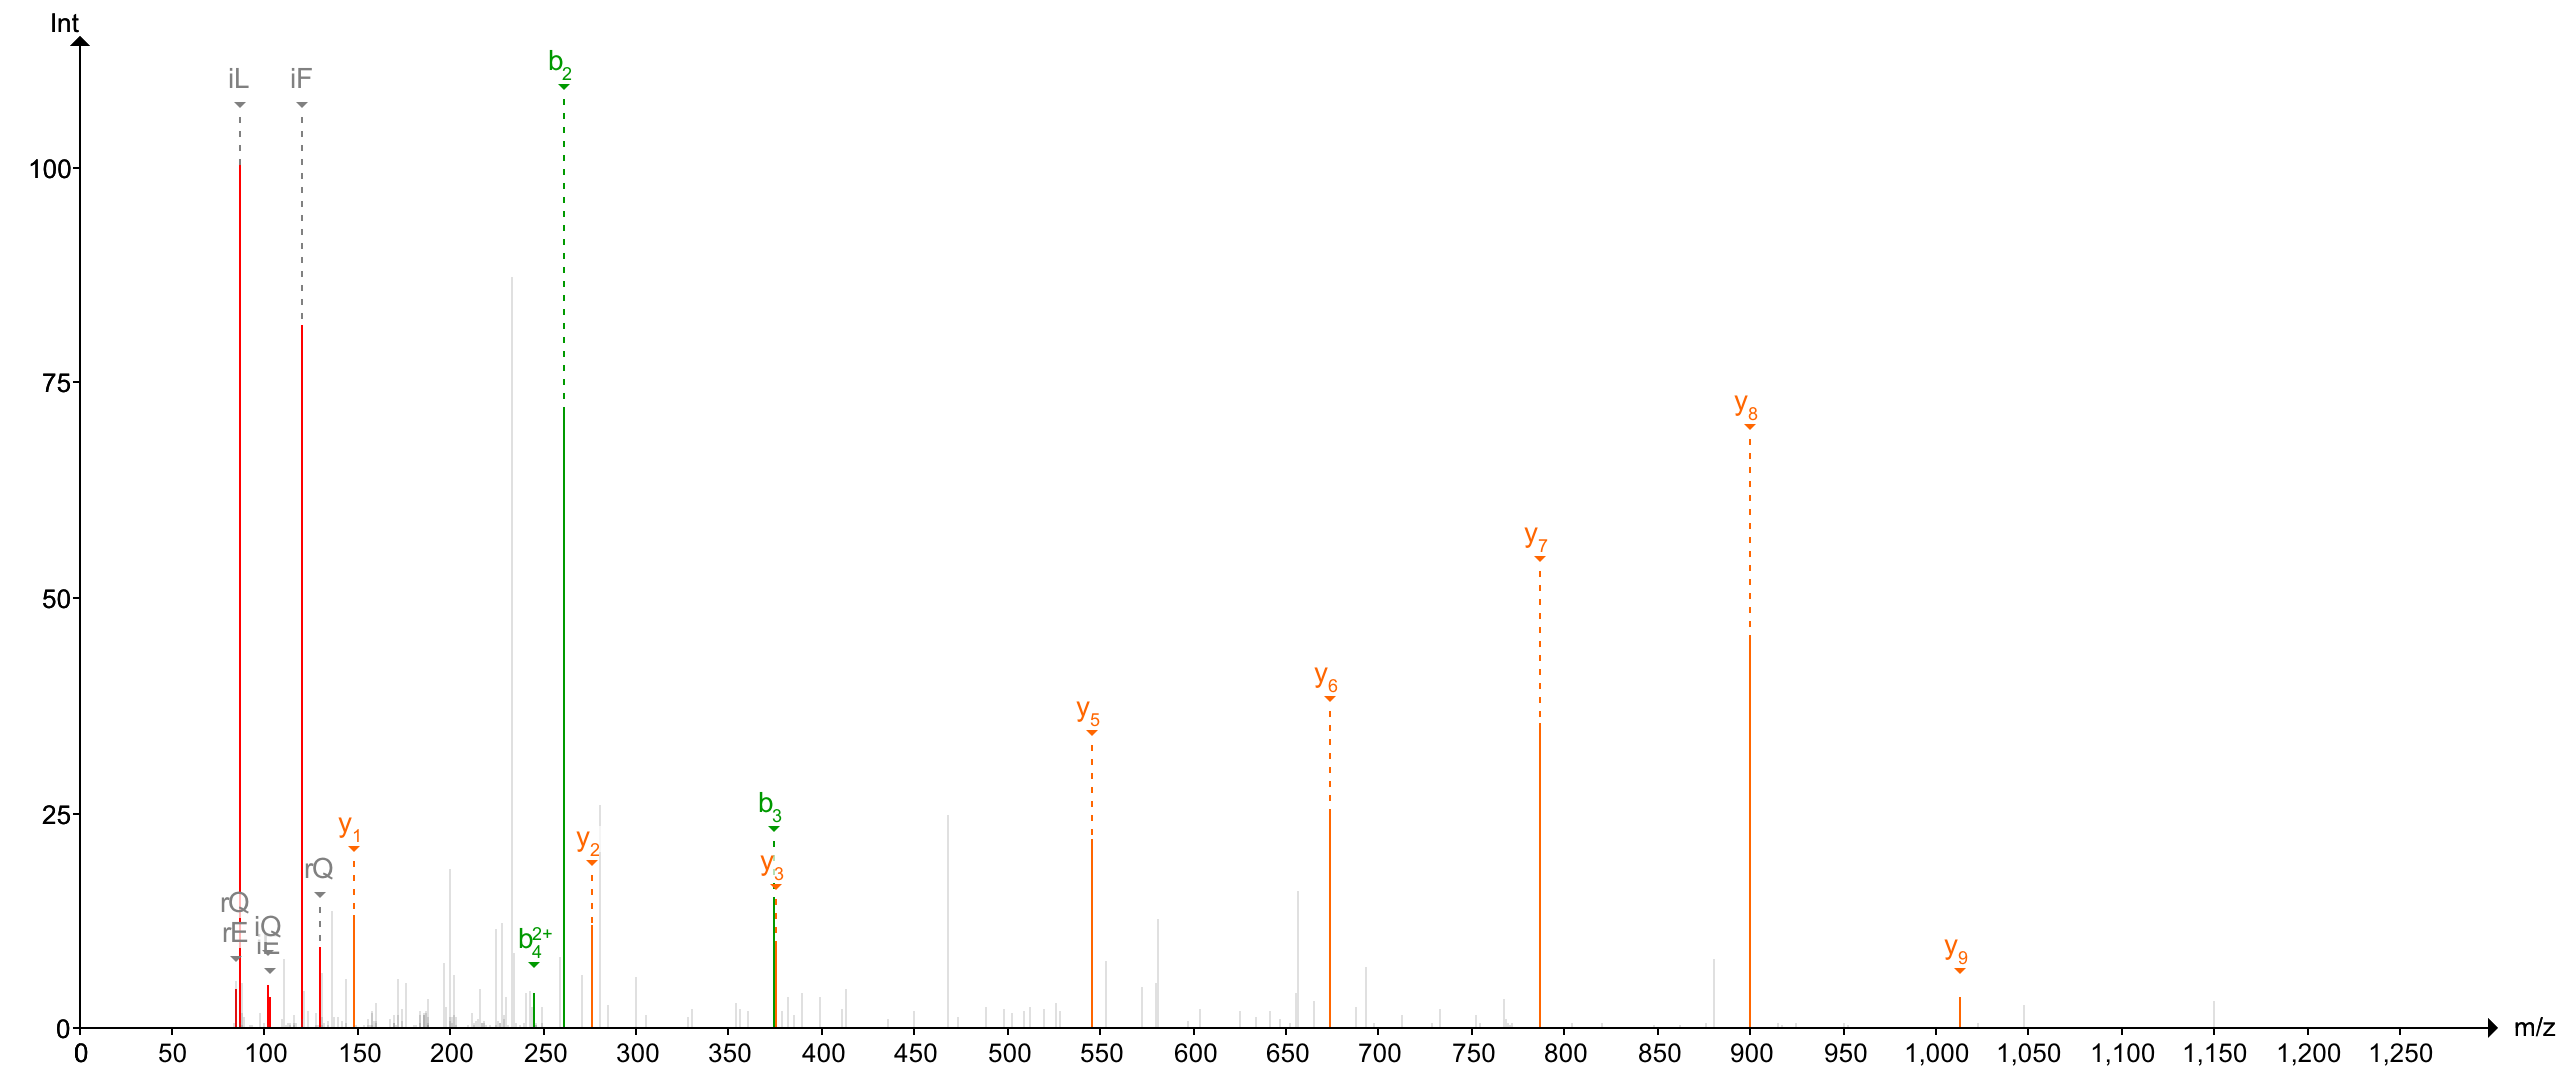

NH<sub>2</sub>-G A<sub>1</sub>T<sub>1</sub>L<sub>1</sub>L<sub>1</sub>L<sub>1</sub>L<sub>1</sub>C<sub>1</sub>A<sub>1</sub>L<sub>1</sub>L<sub>1</sub>V<sub>1</sub>R-COOH

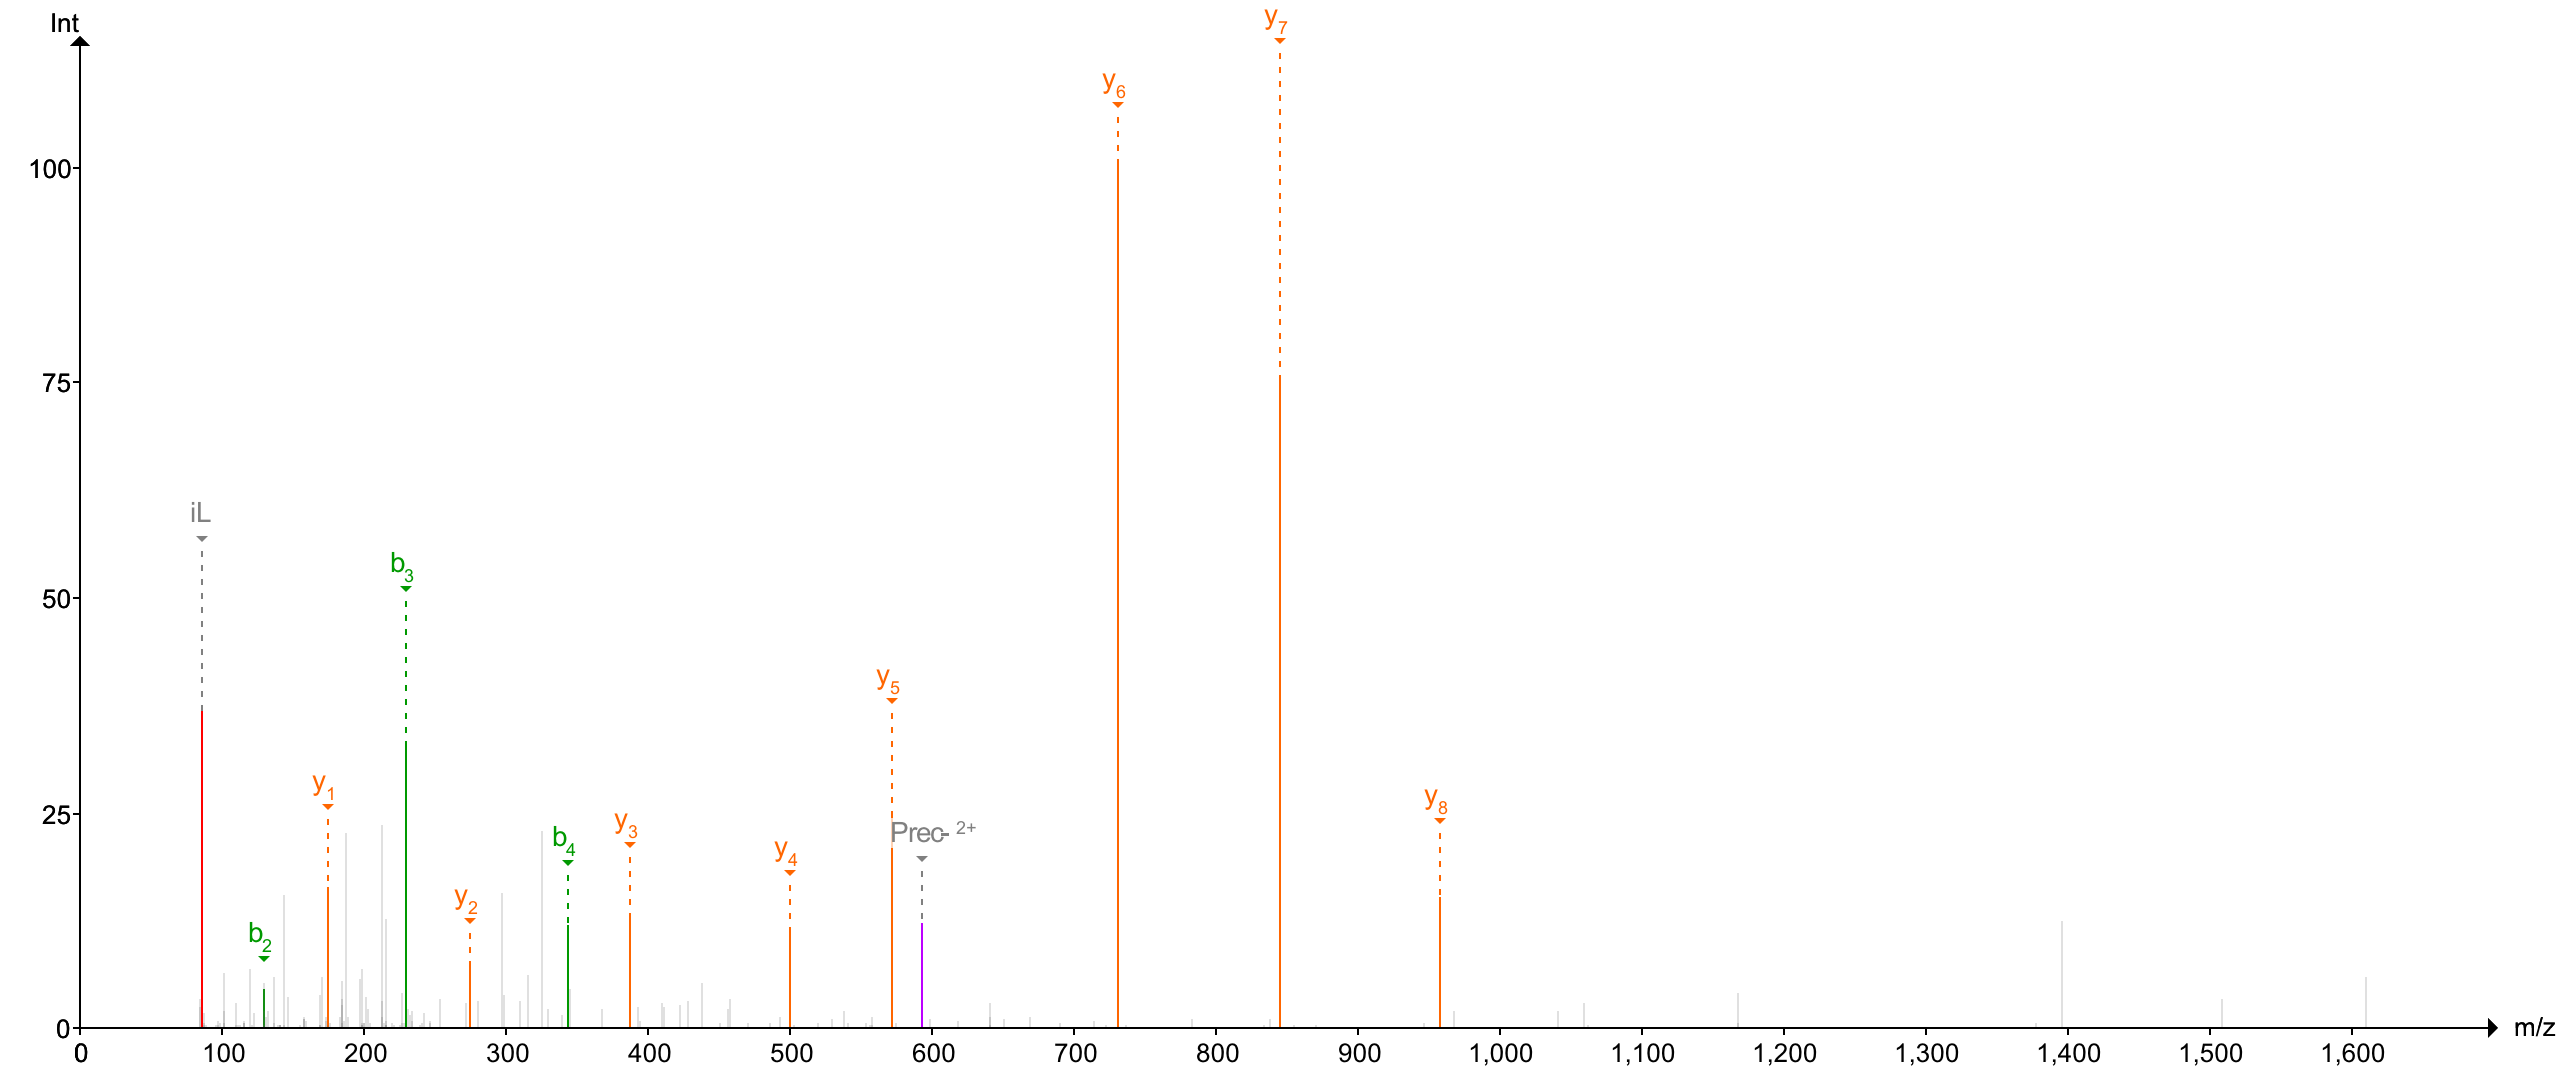

NH<sub>2</sub>-L Y L L A P L T T T C G N L P F R-COOH

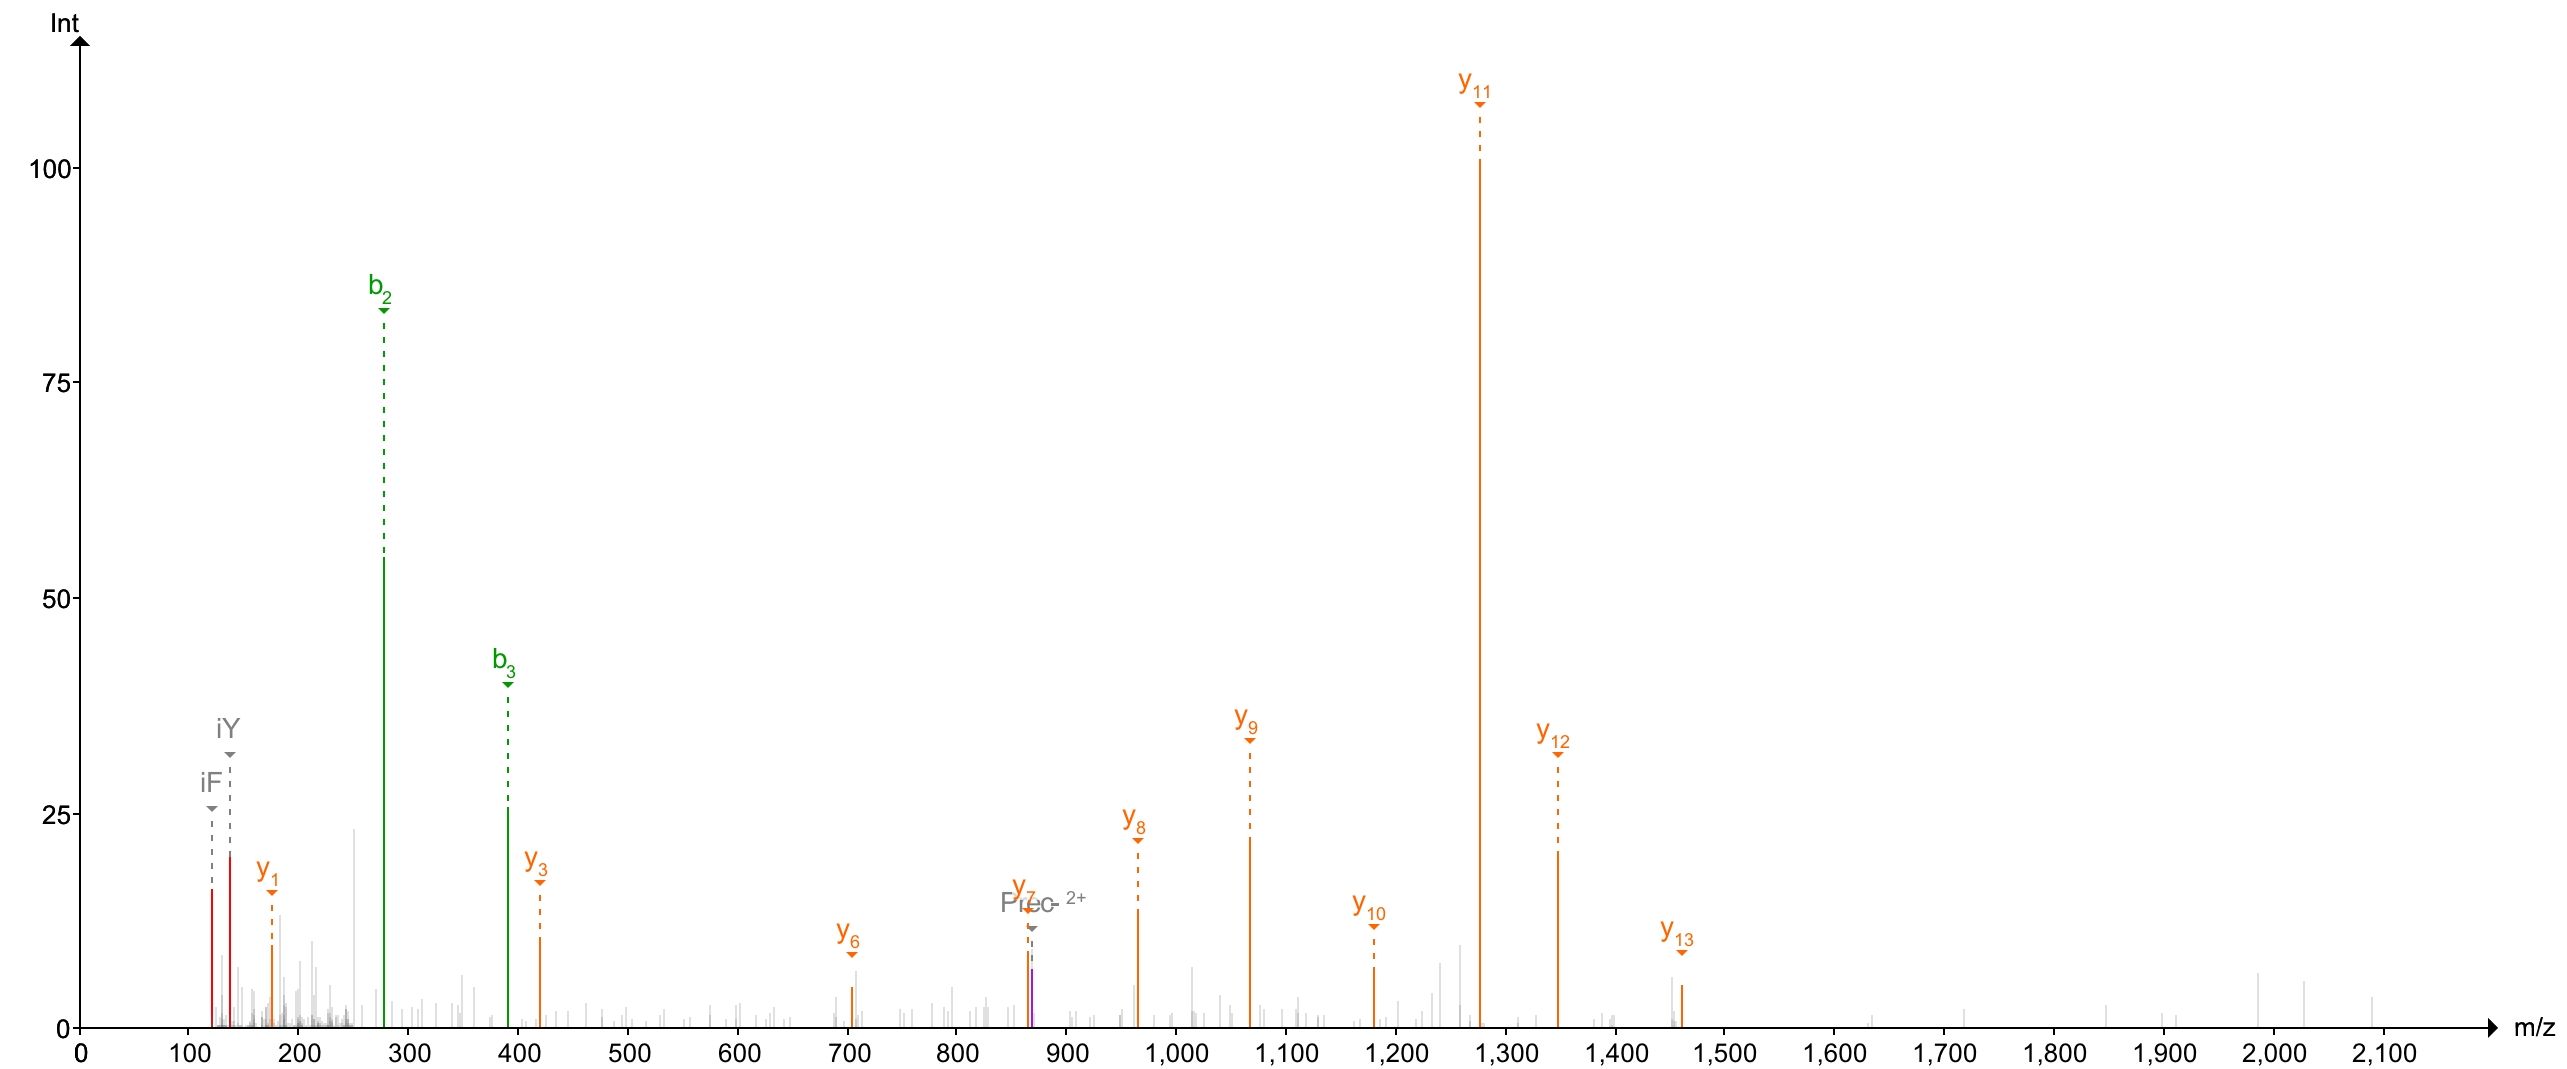

NH<sub>2</sub>-L I H I P I N I N I I I V I G G-COOH

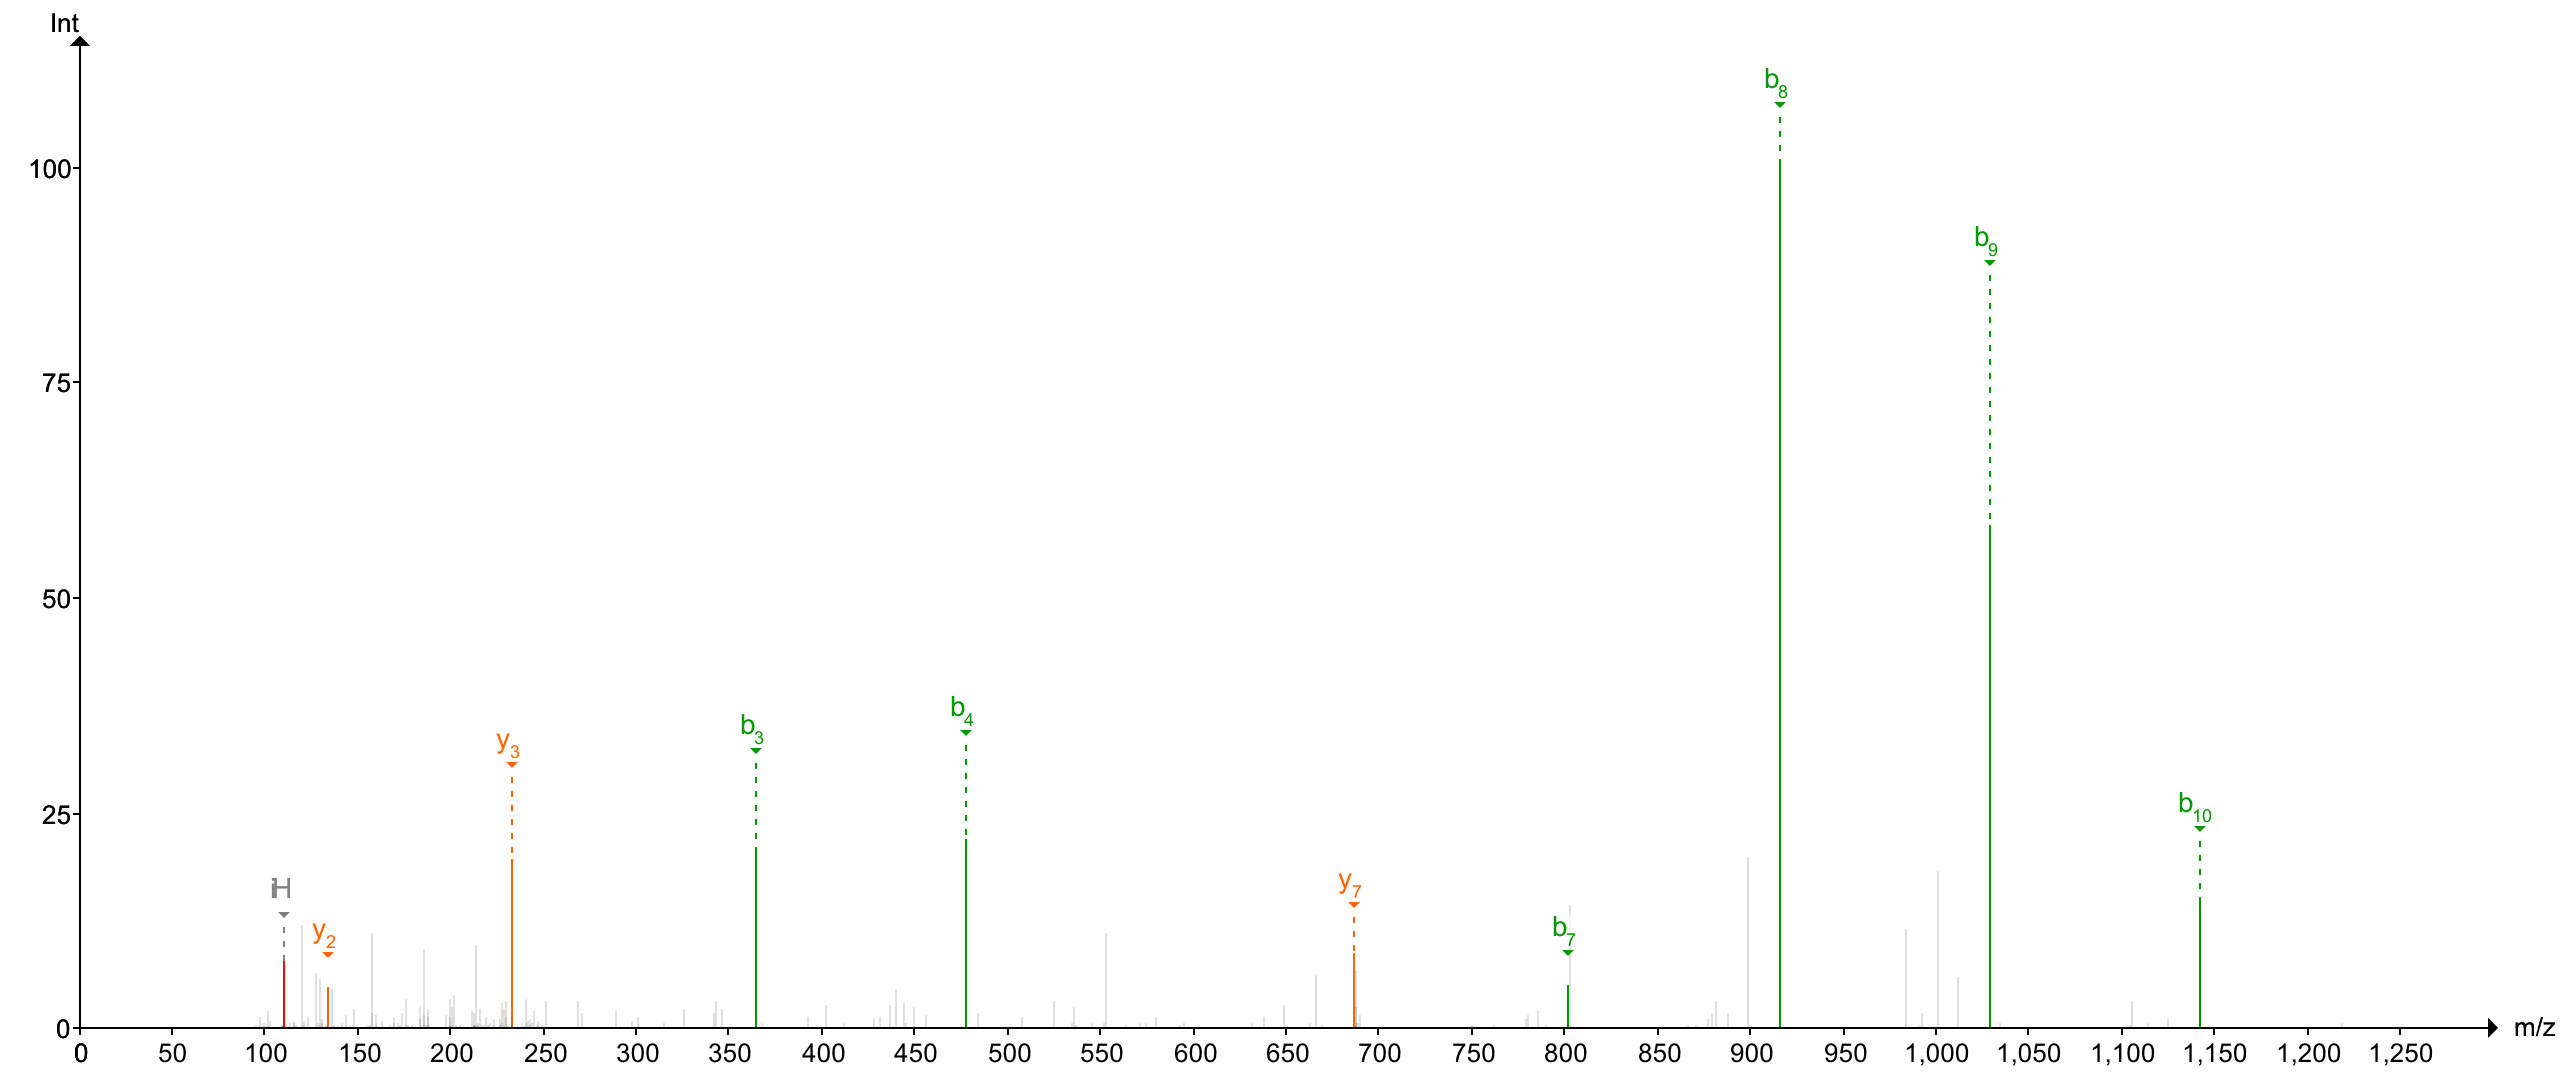

NH<sub>2</sub>-P L L L Q L P I G E A K-COOH

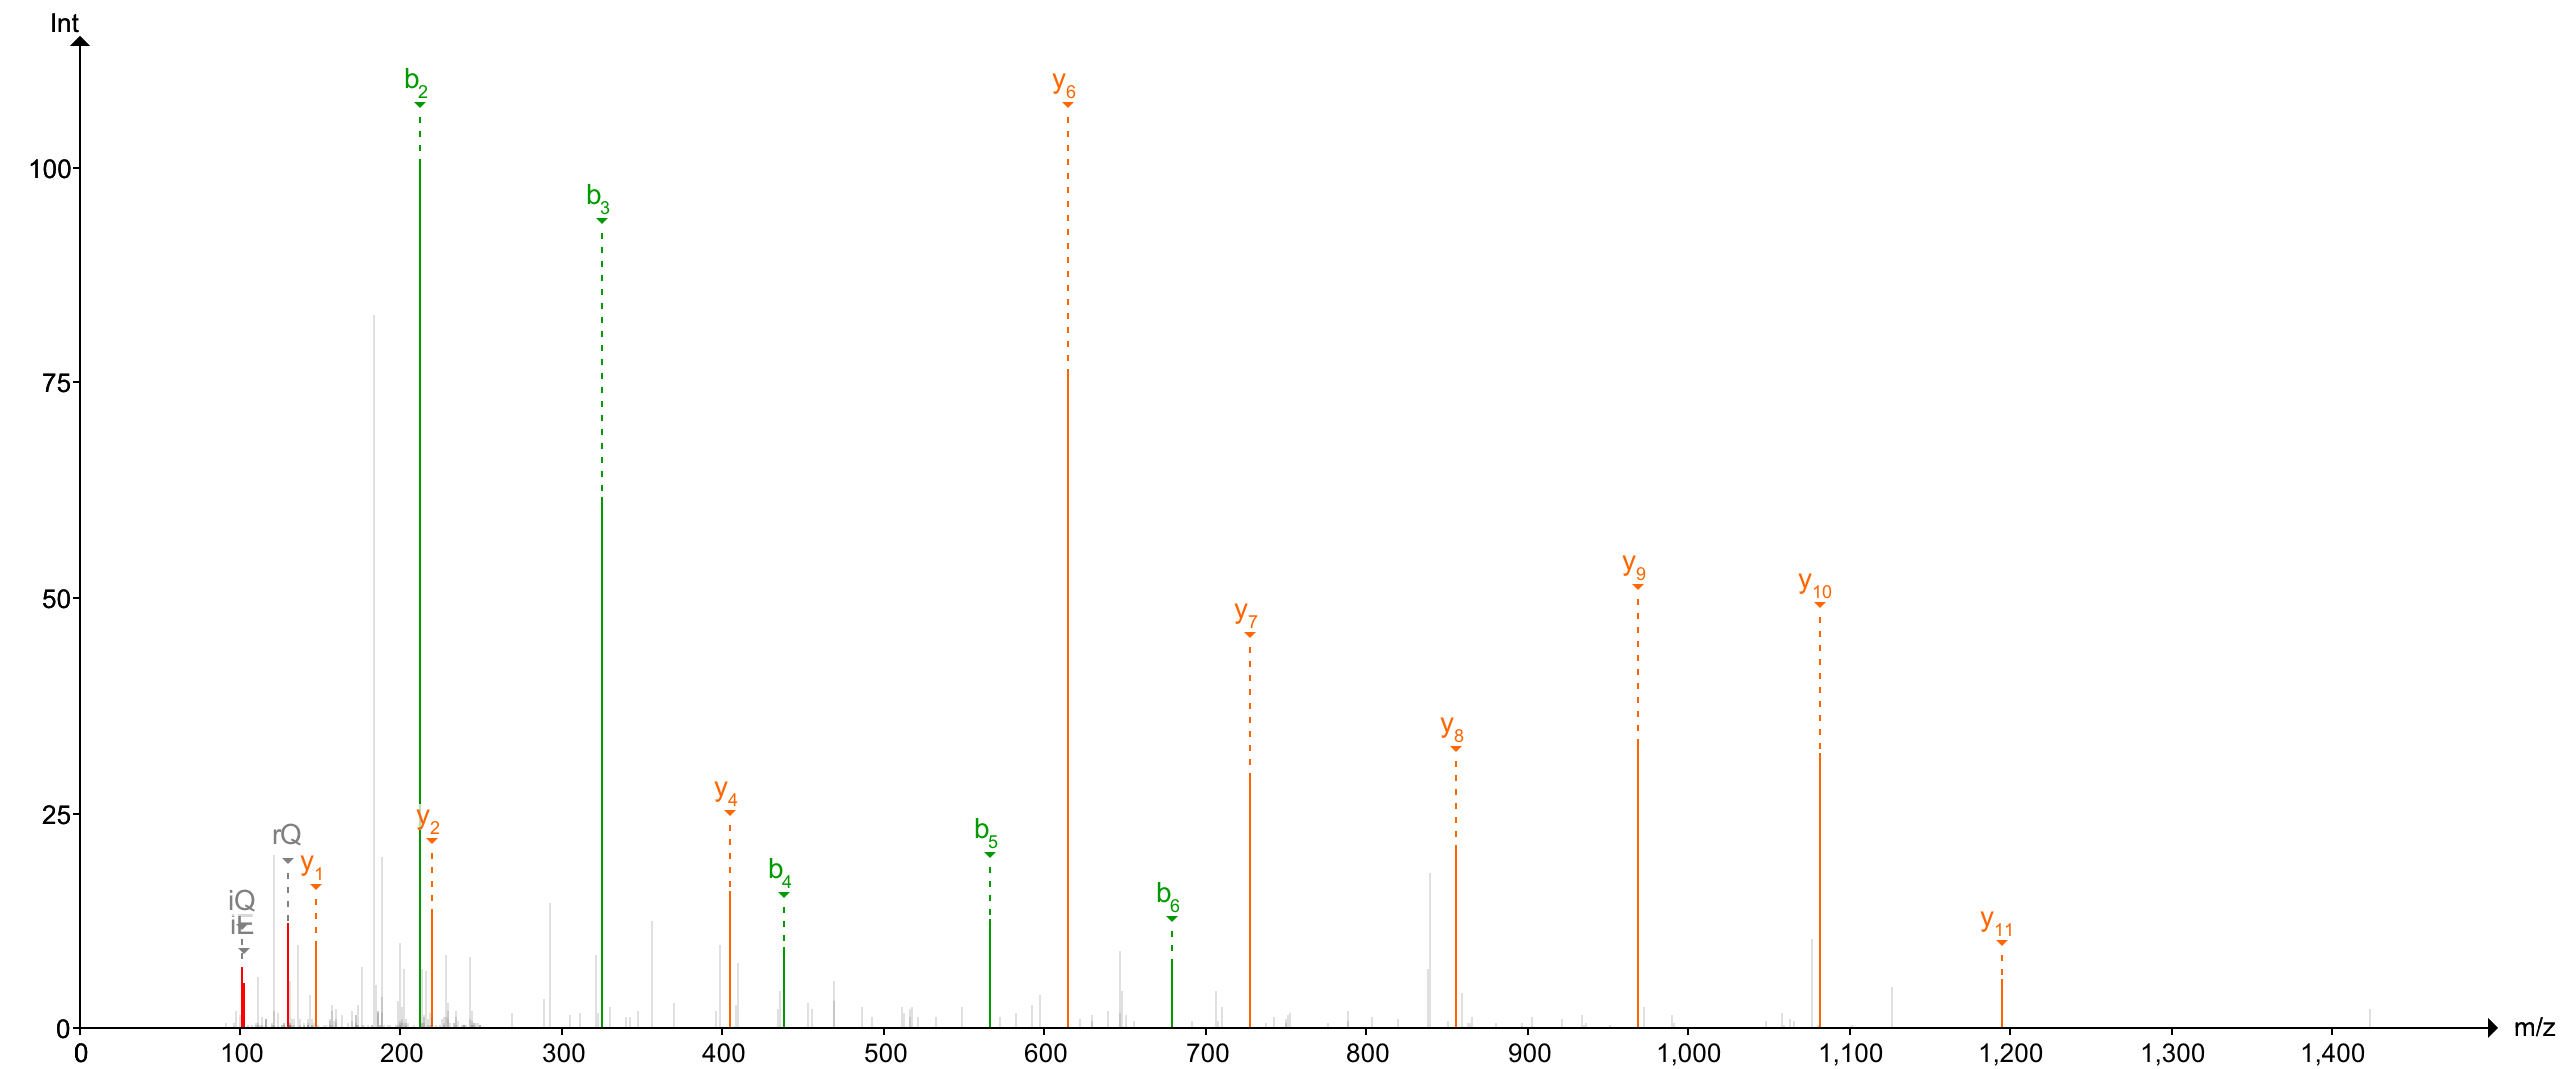

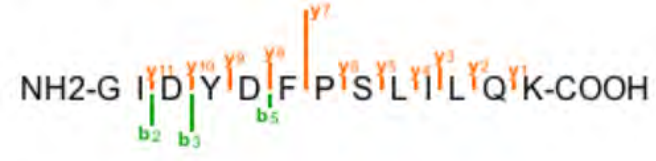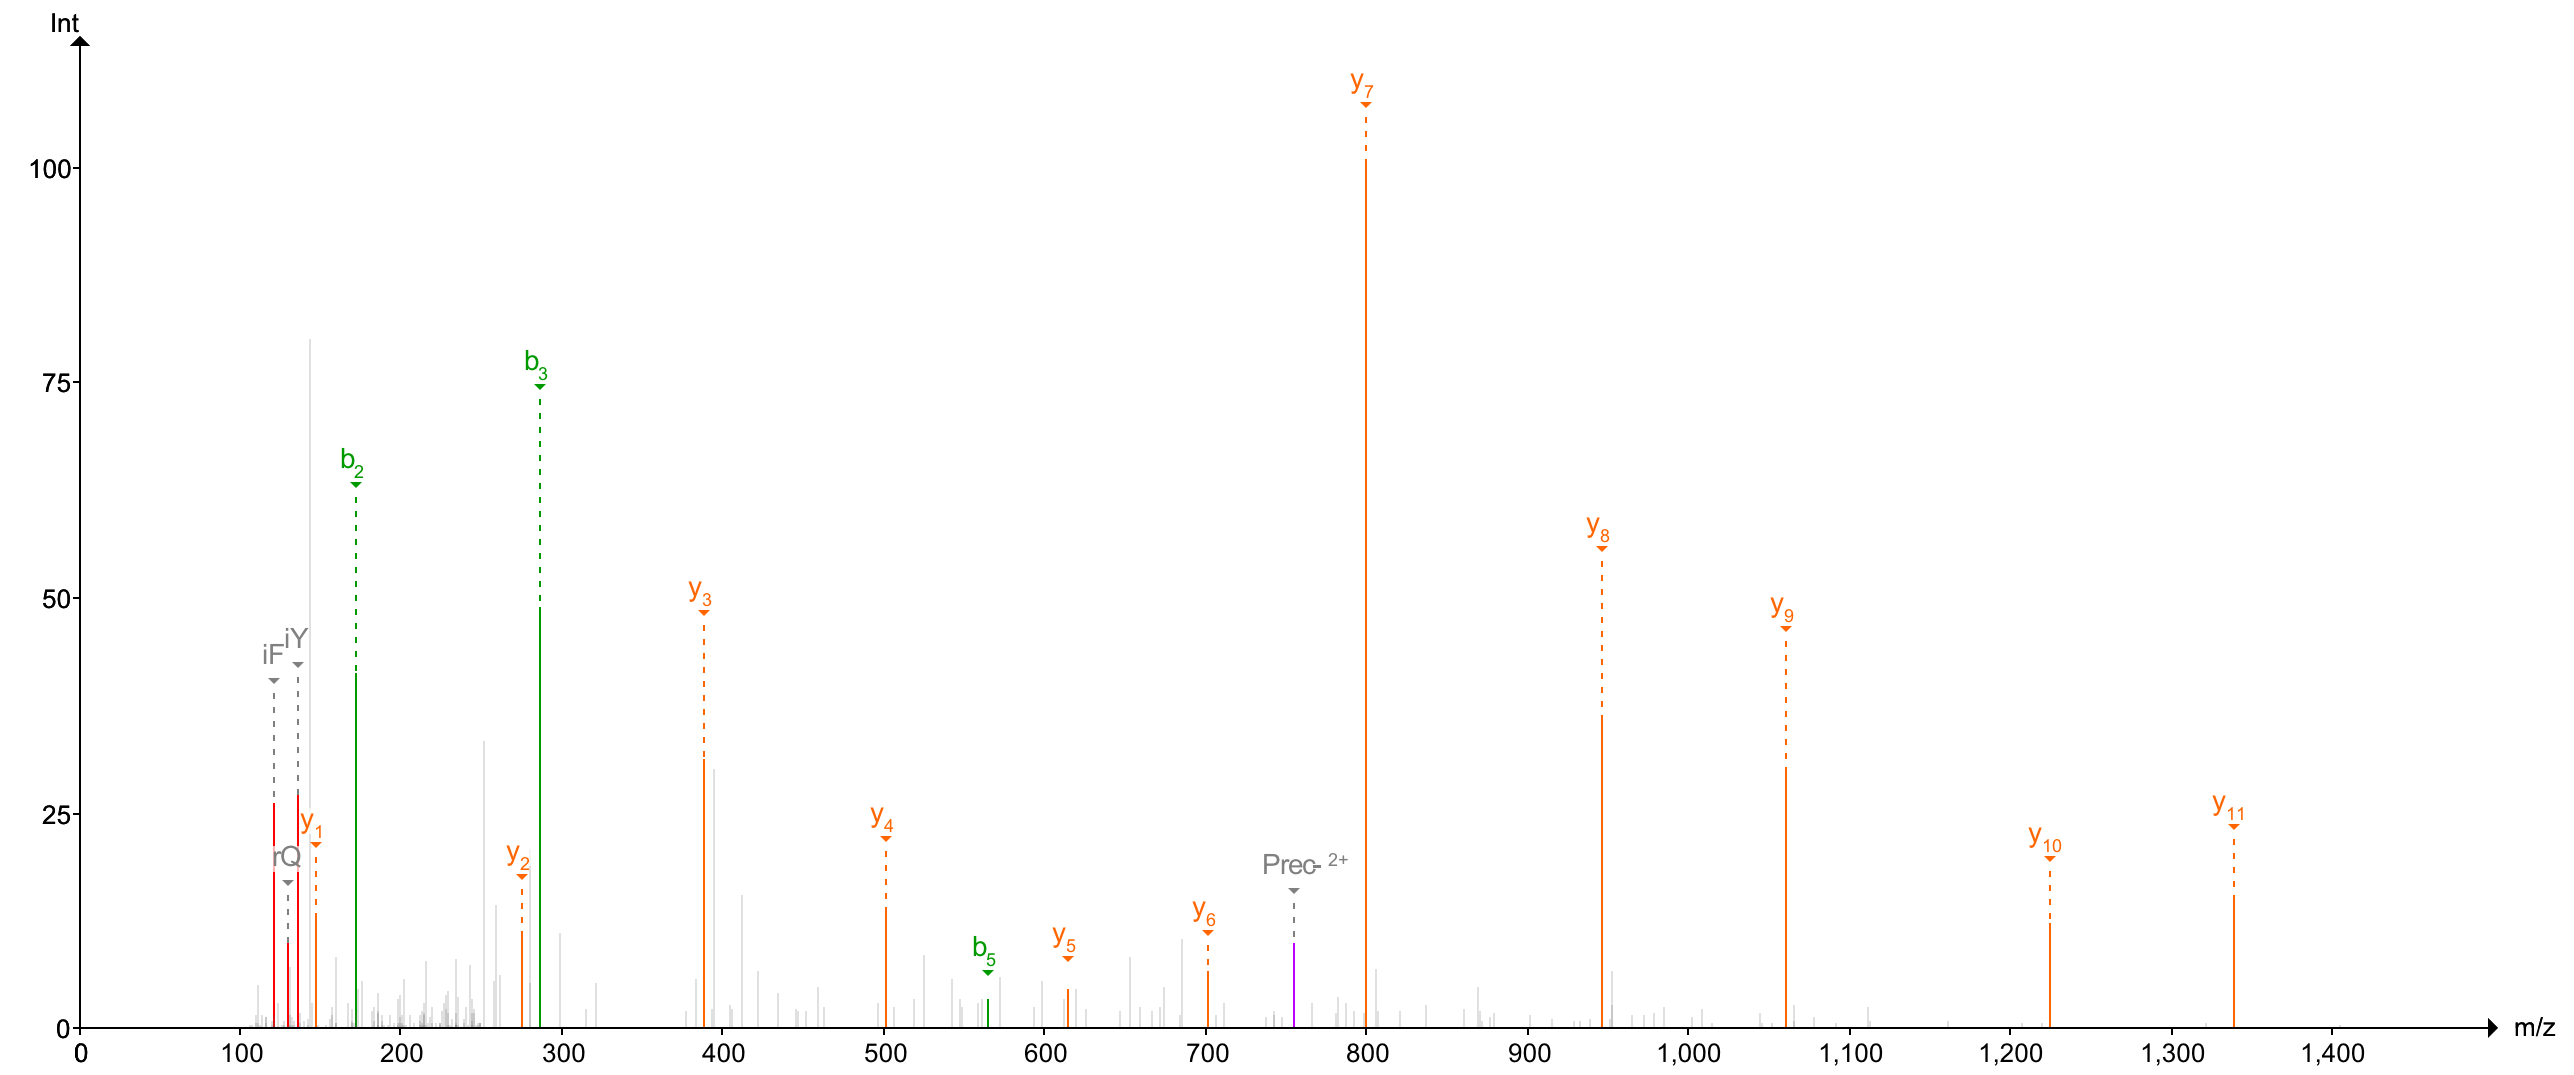



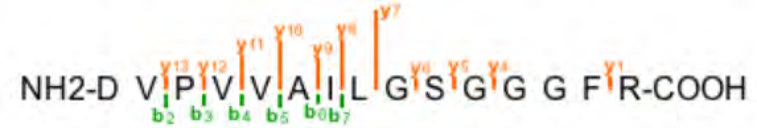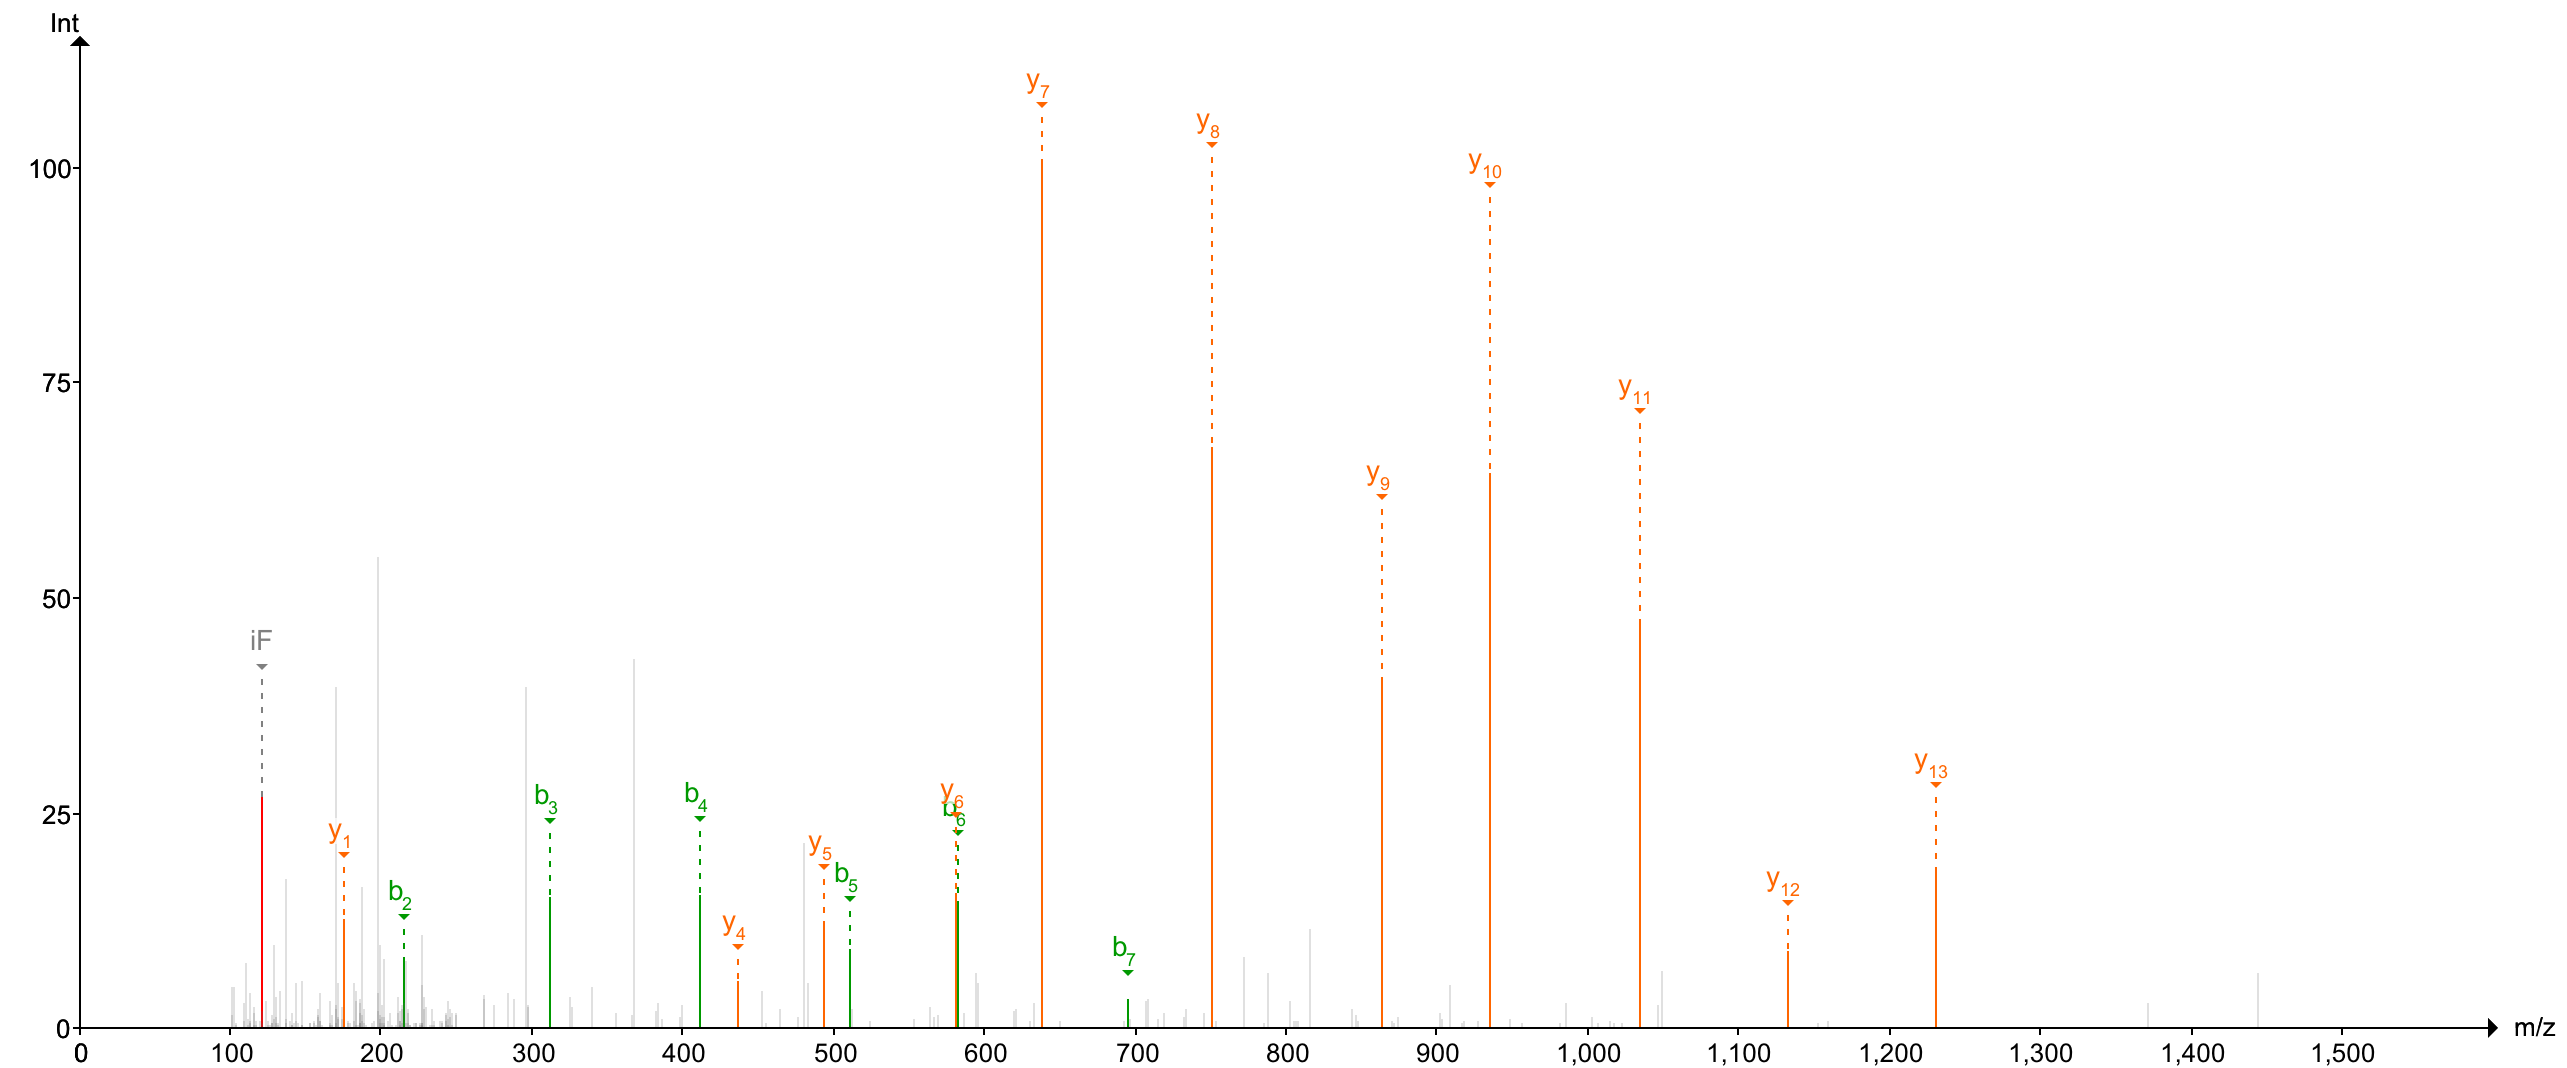

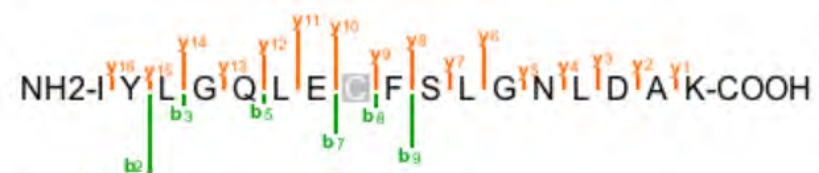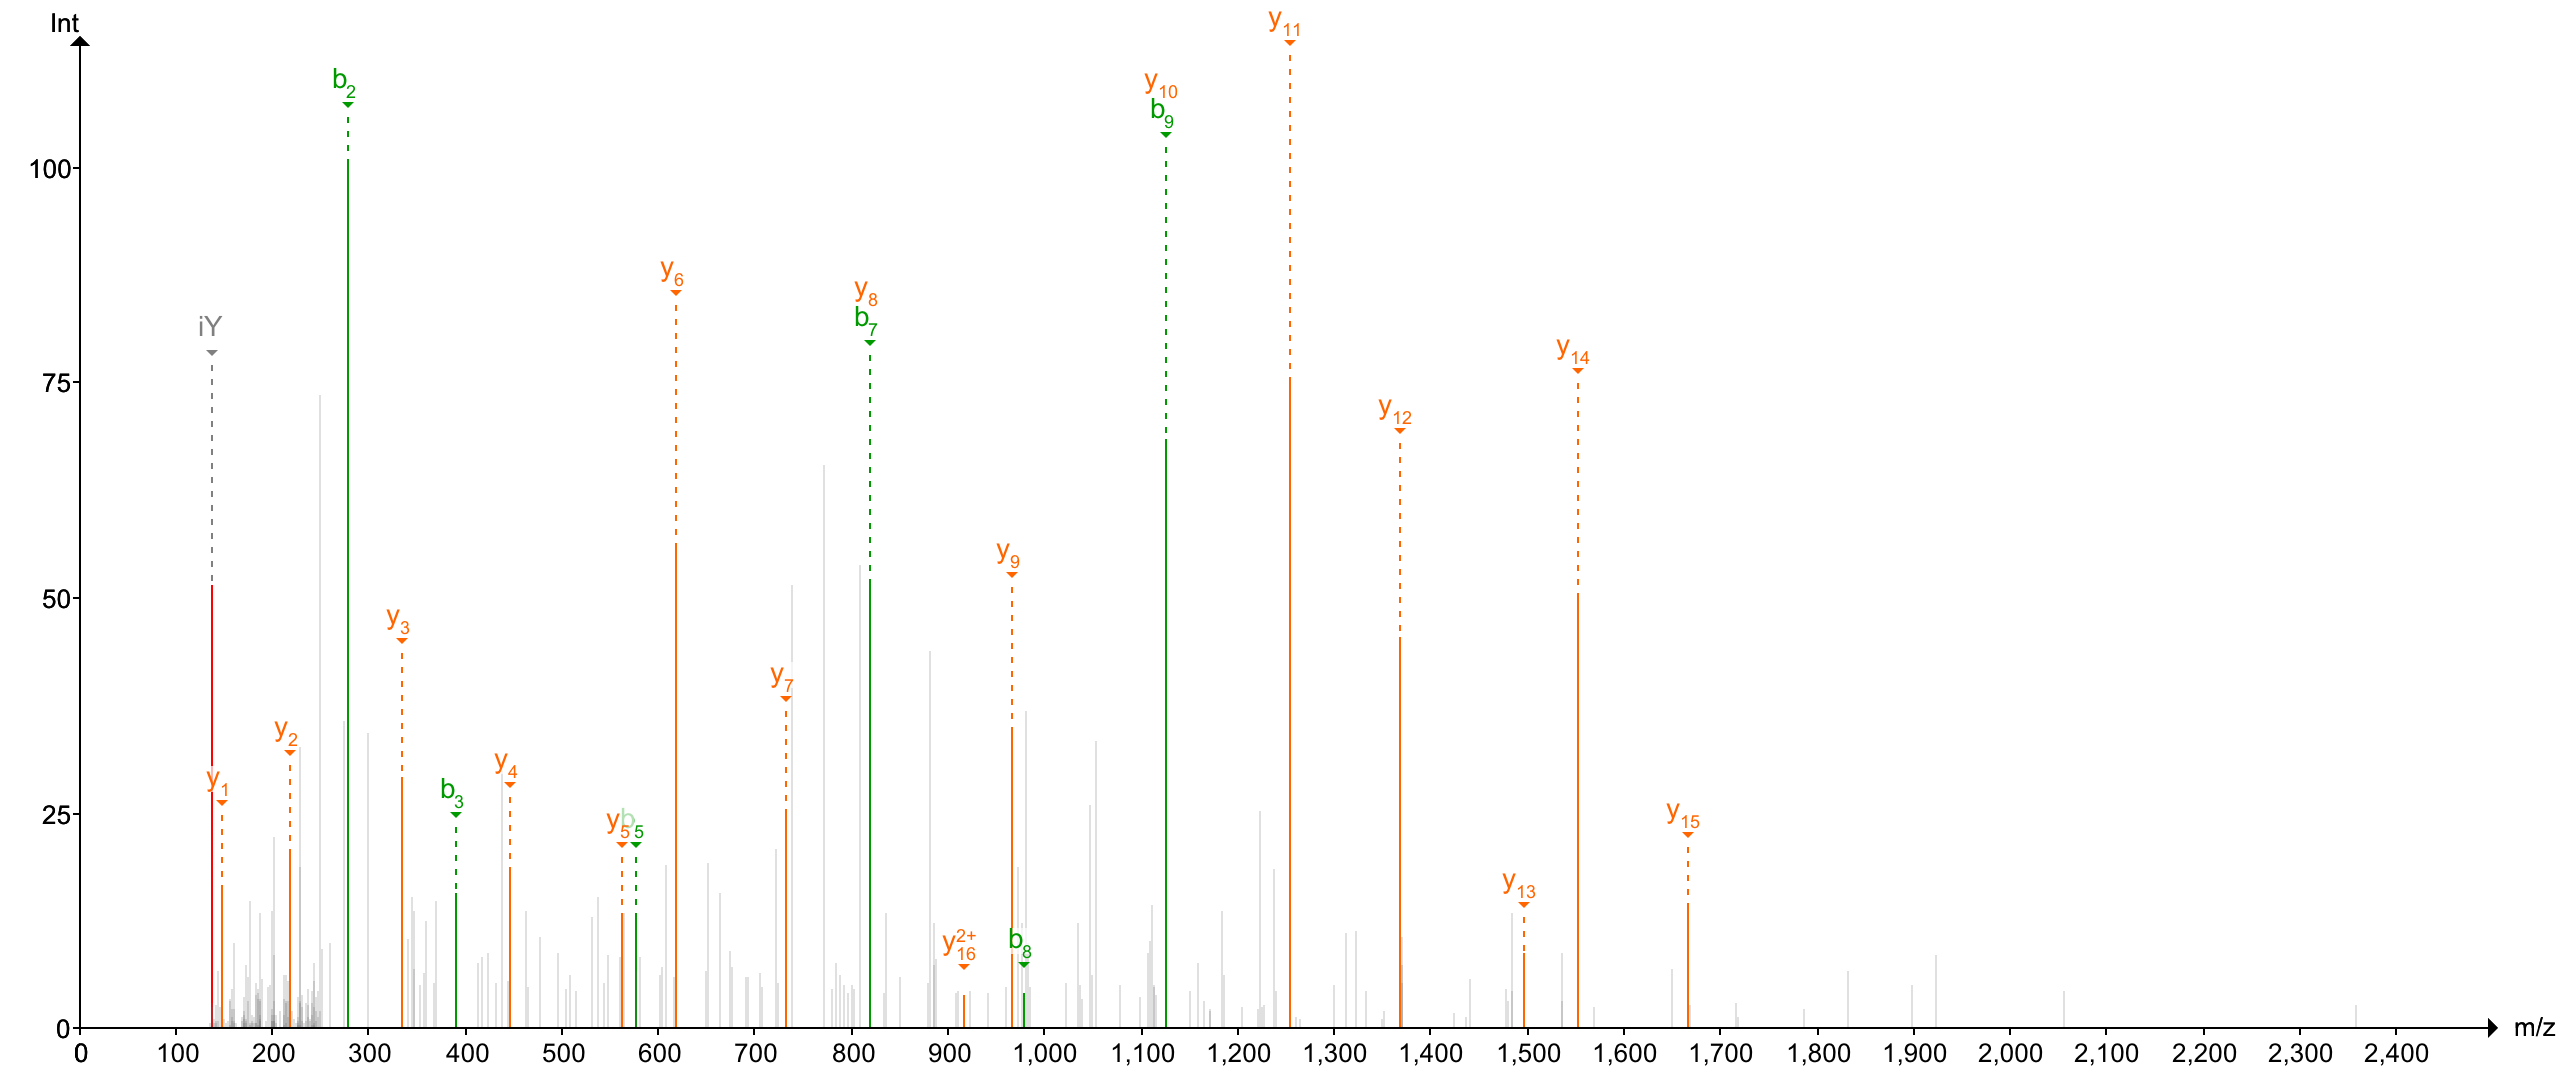

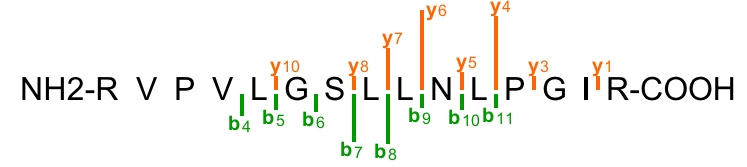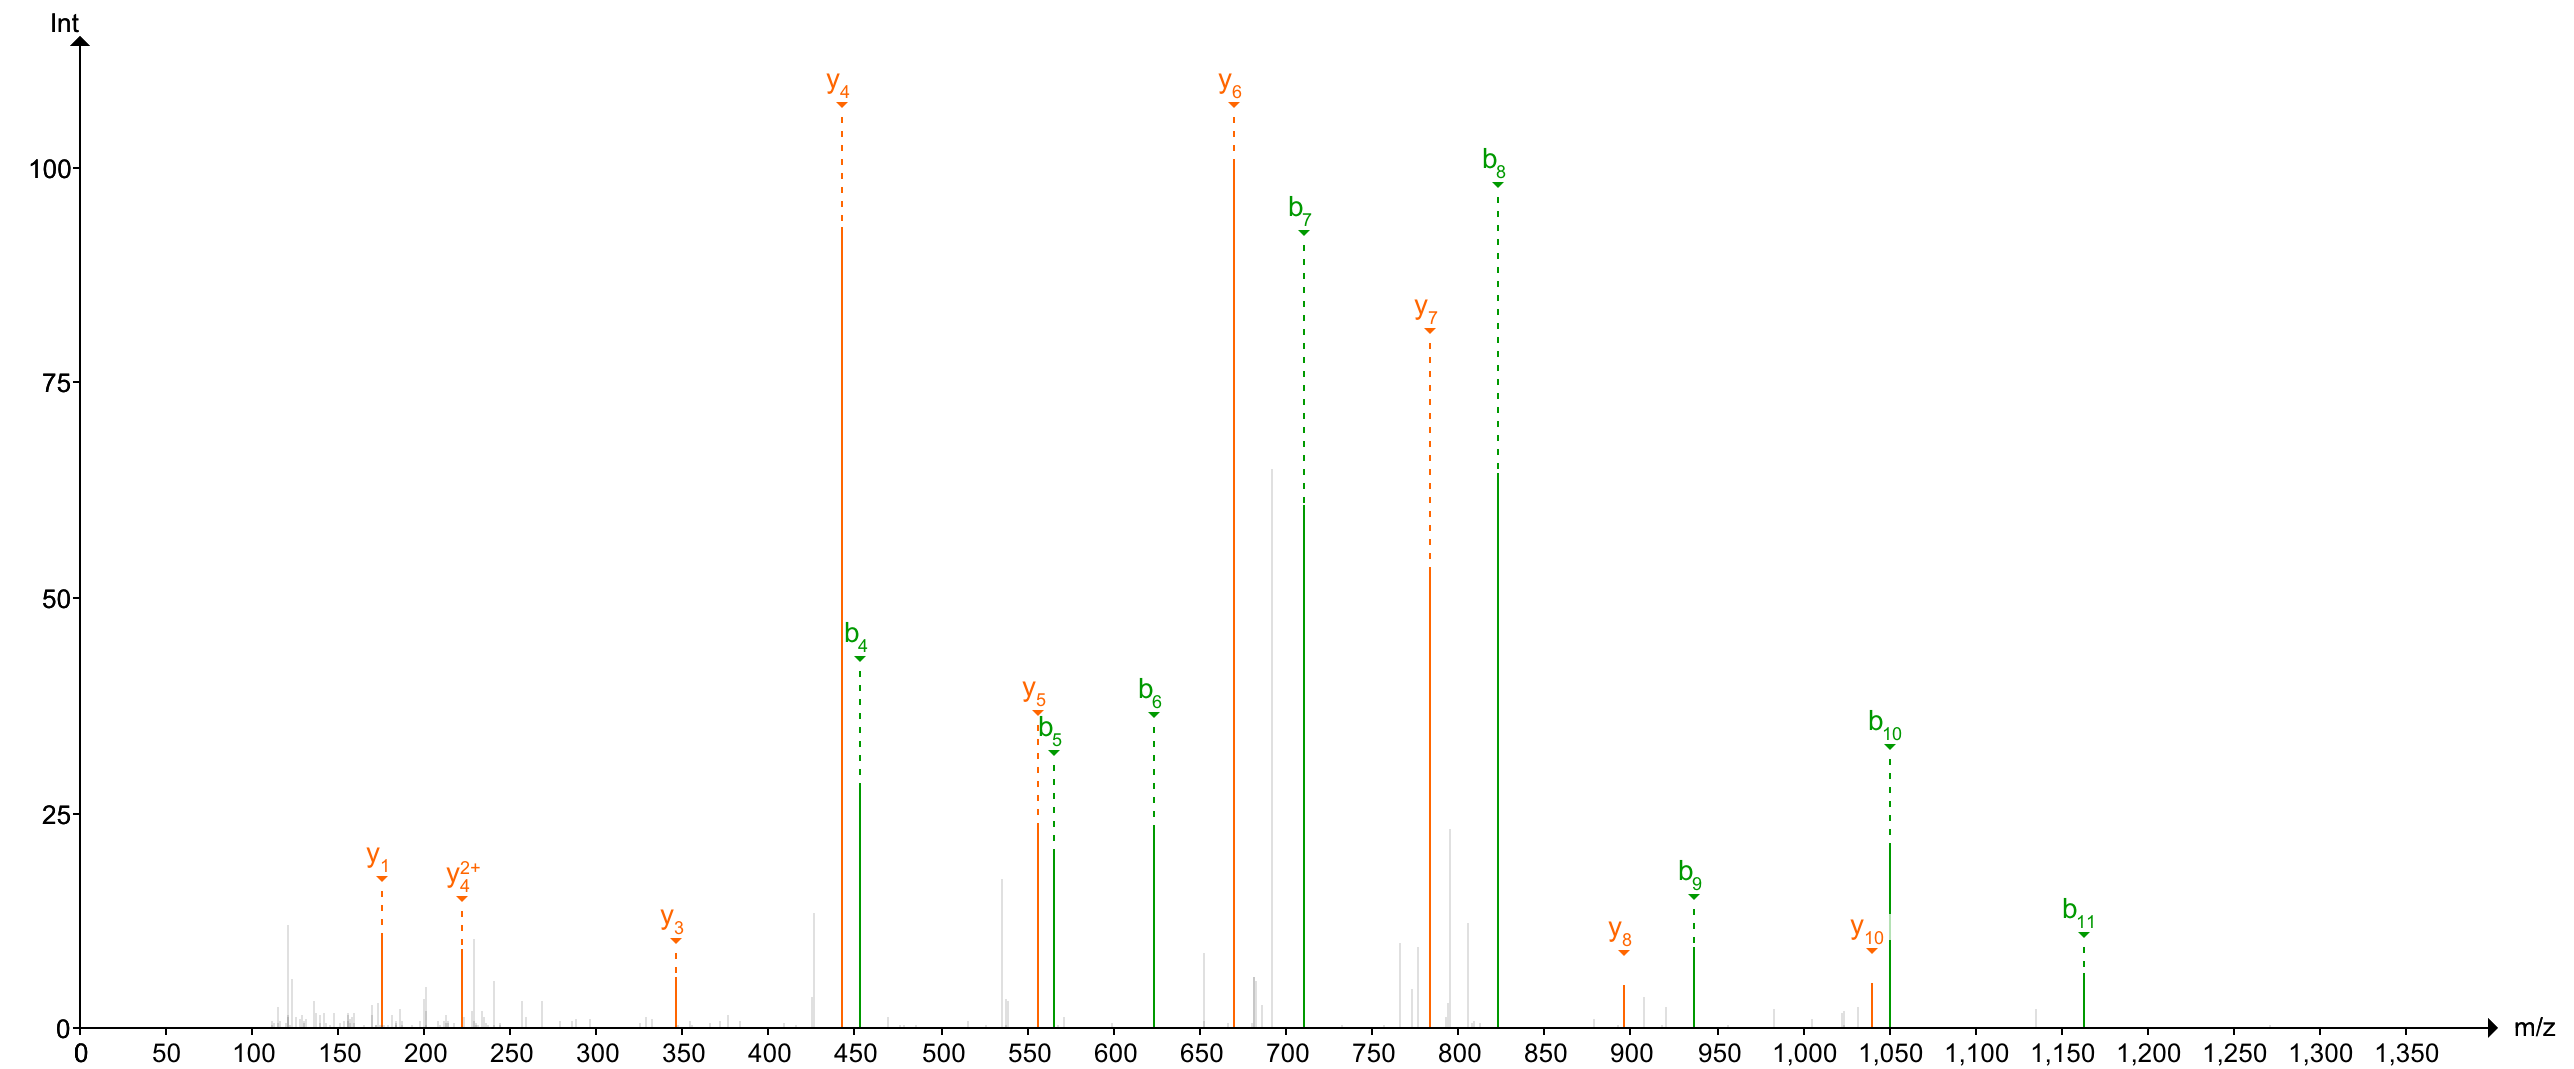

NH<sub>2</sub>-D F P D E V L Q L I H E R-COOH

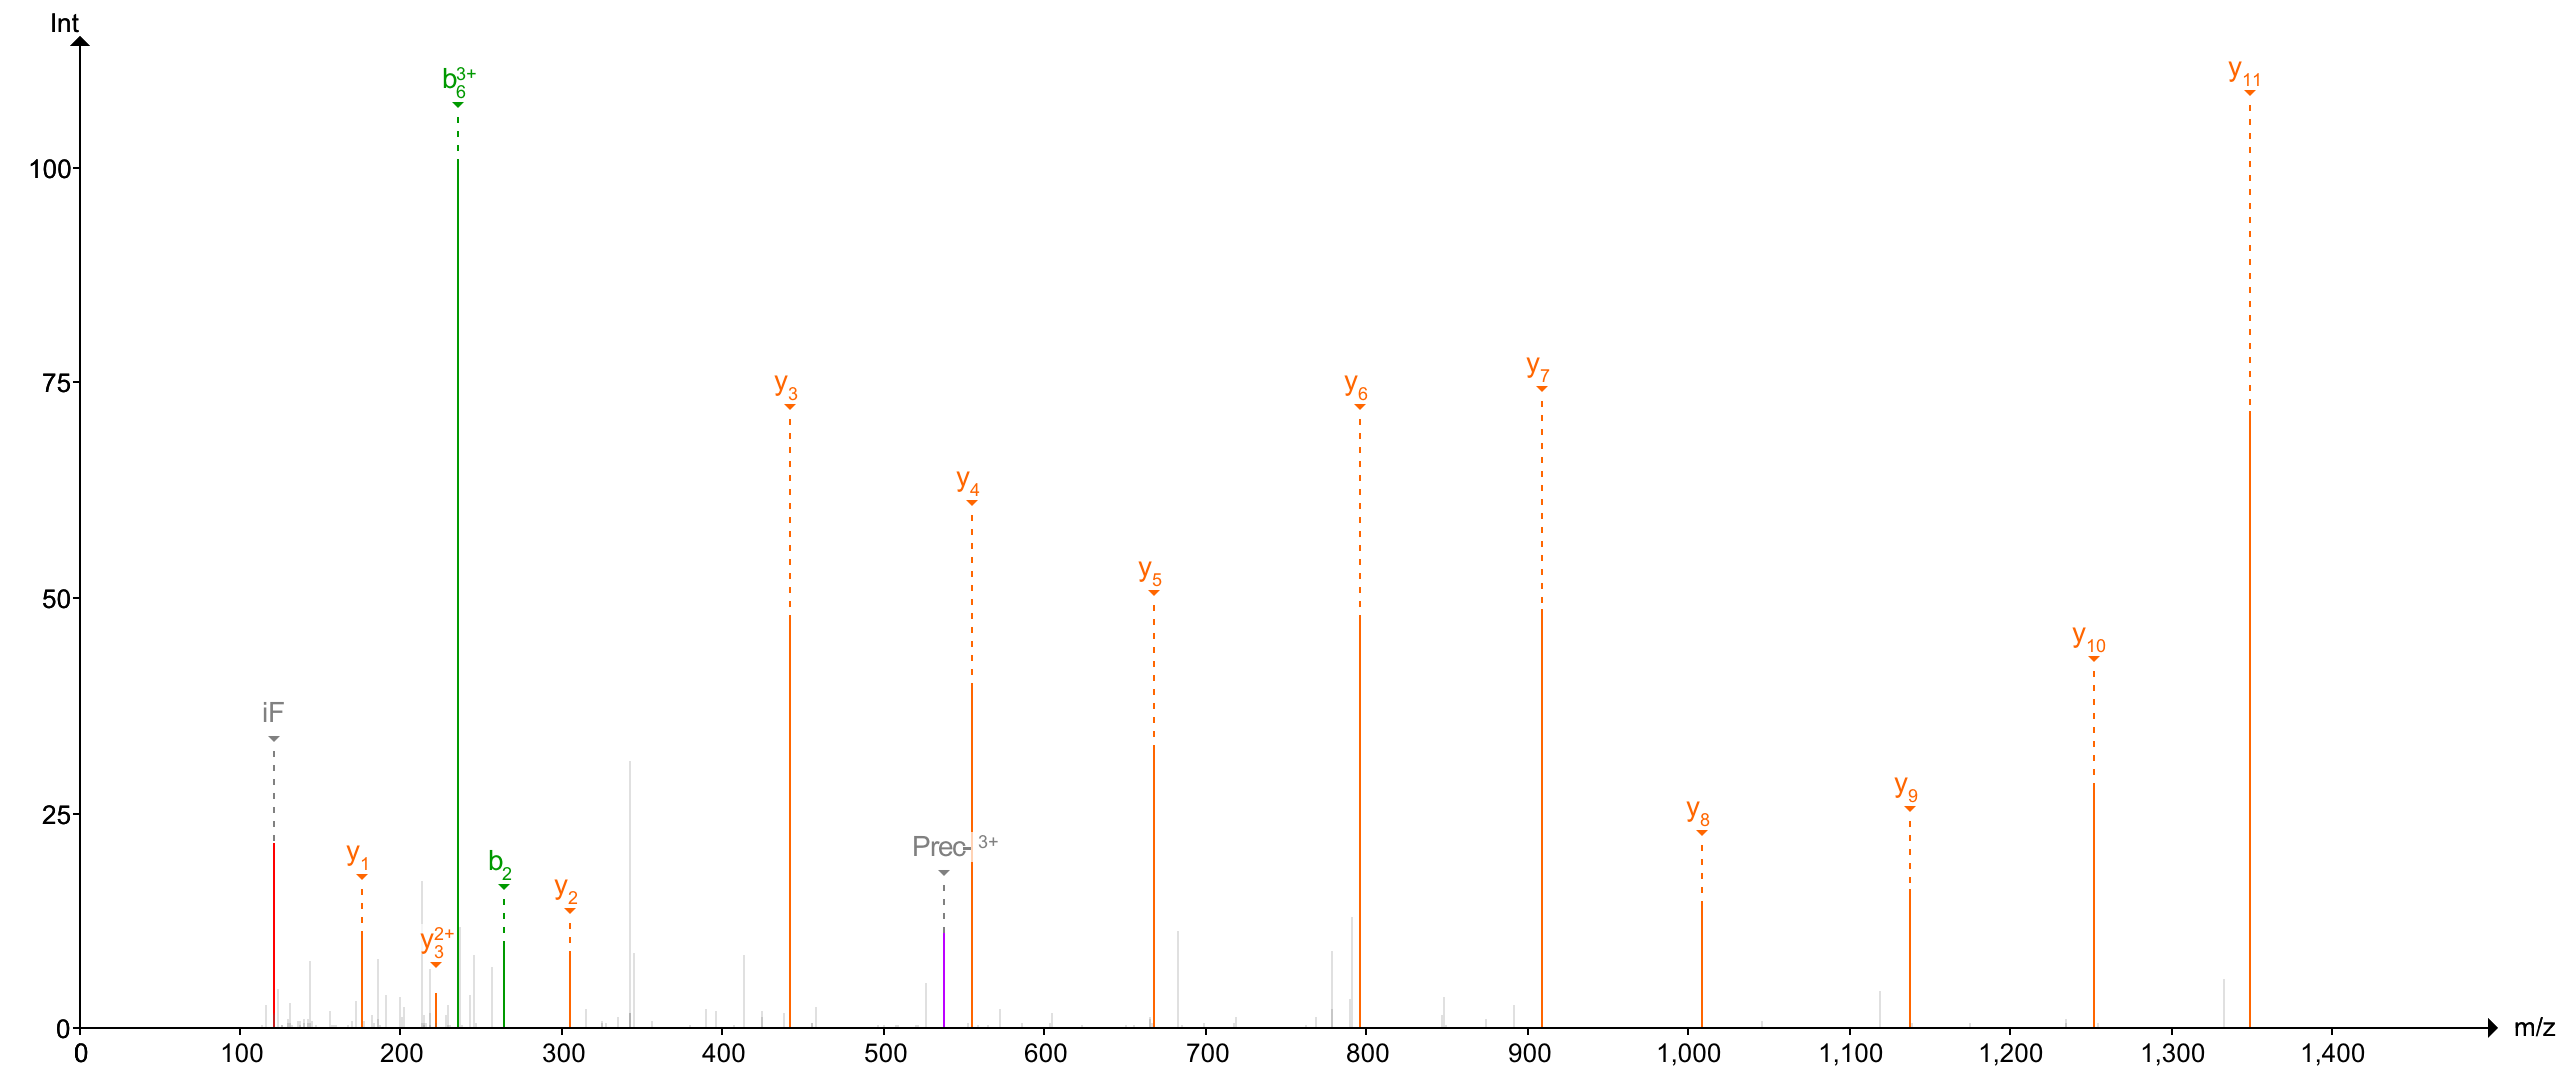

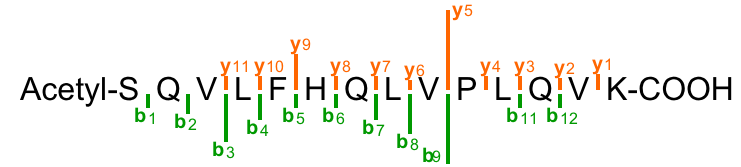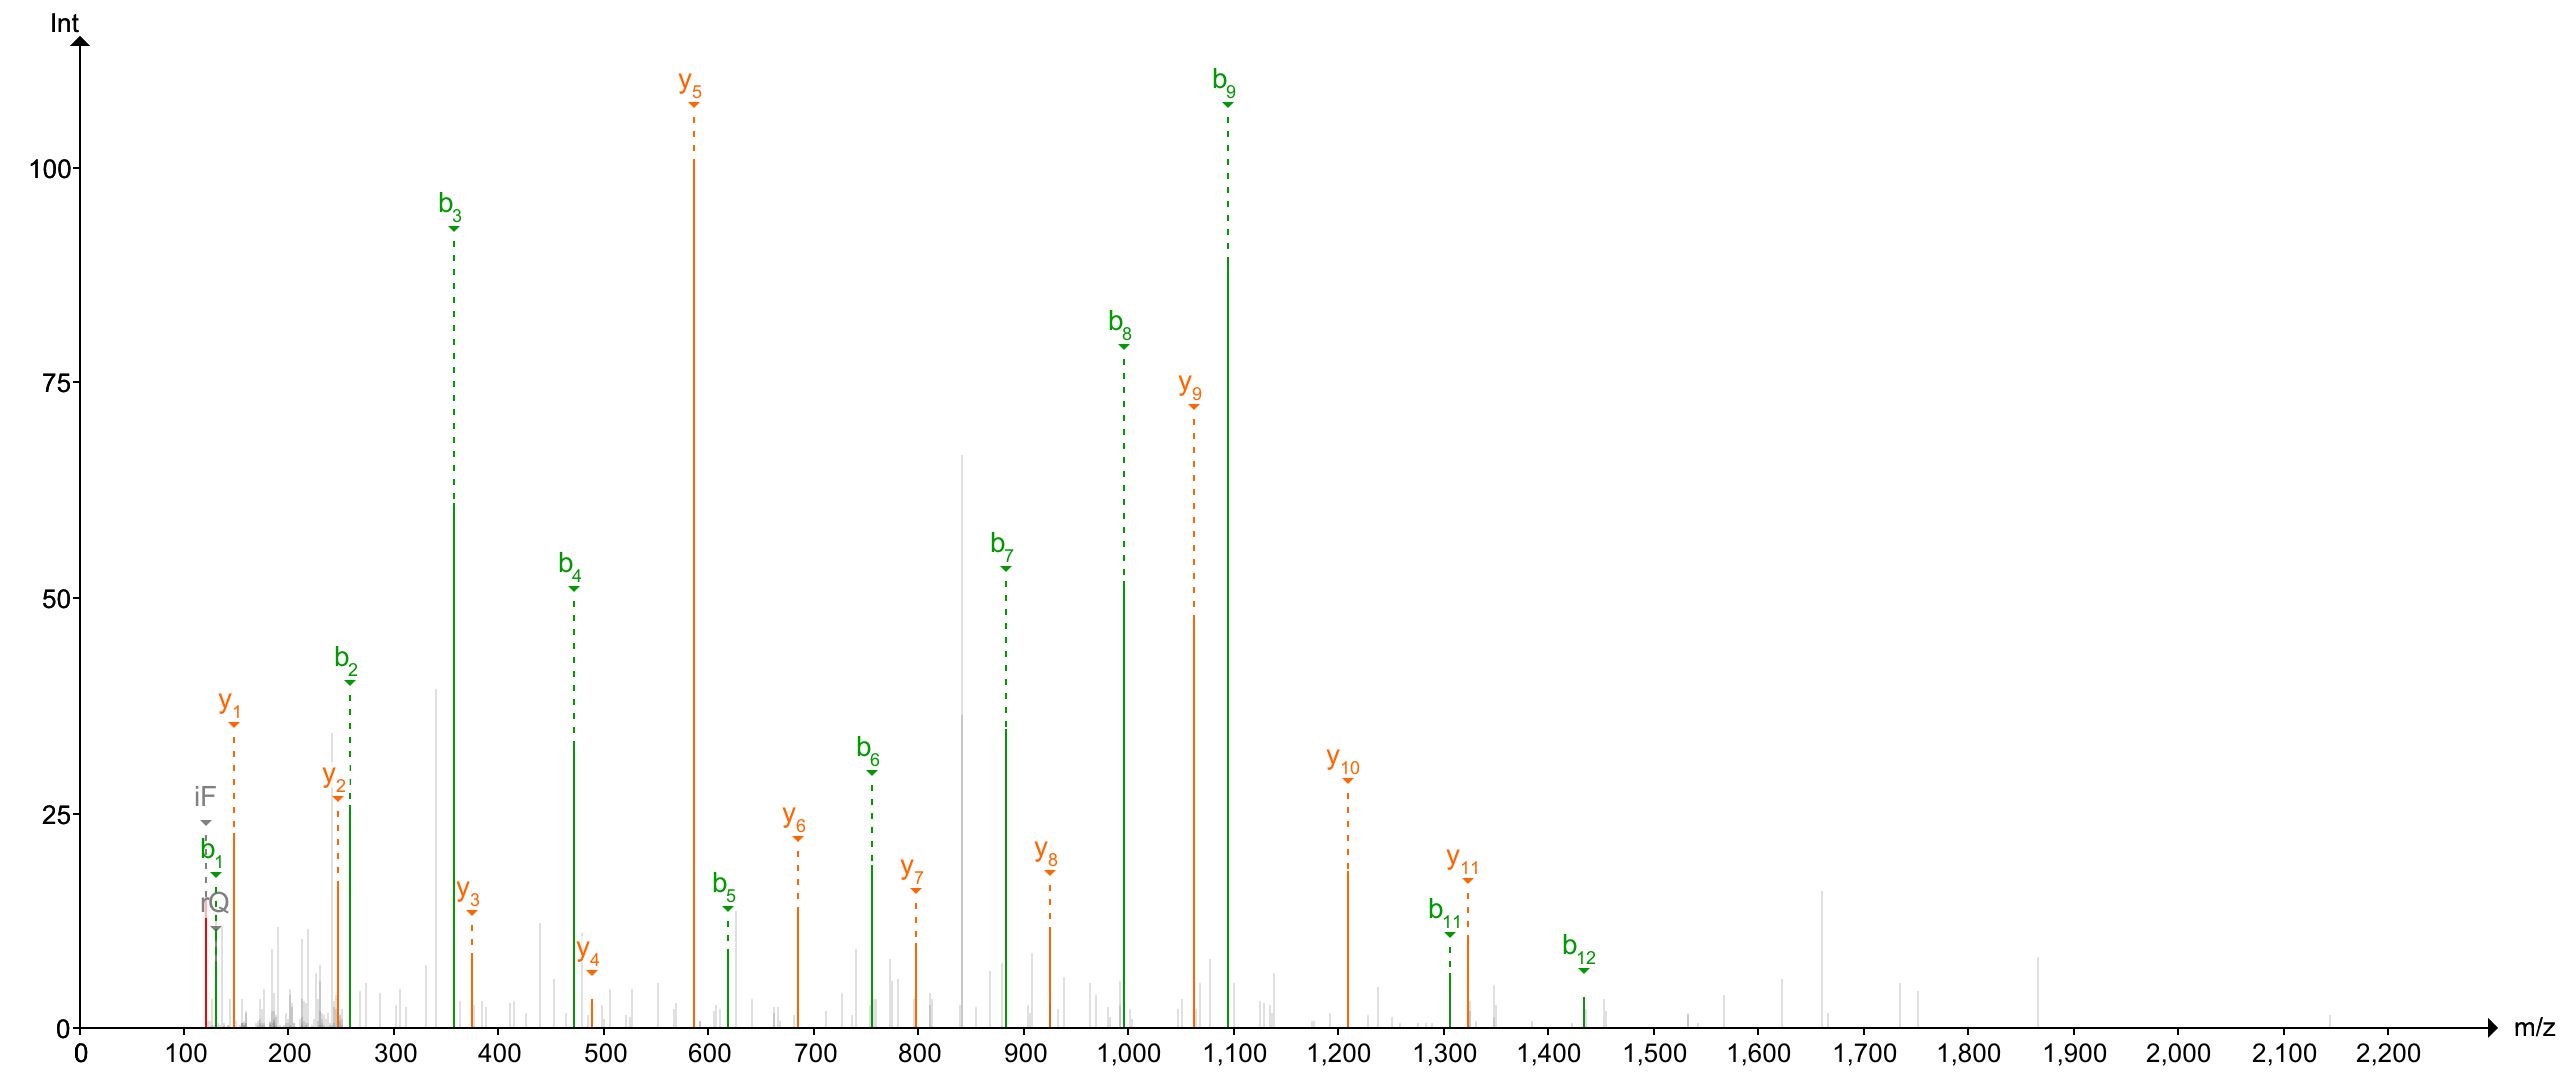

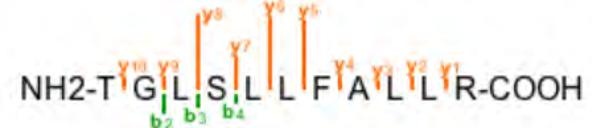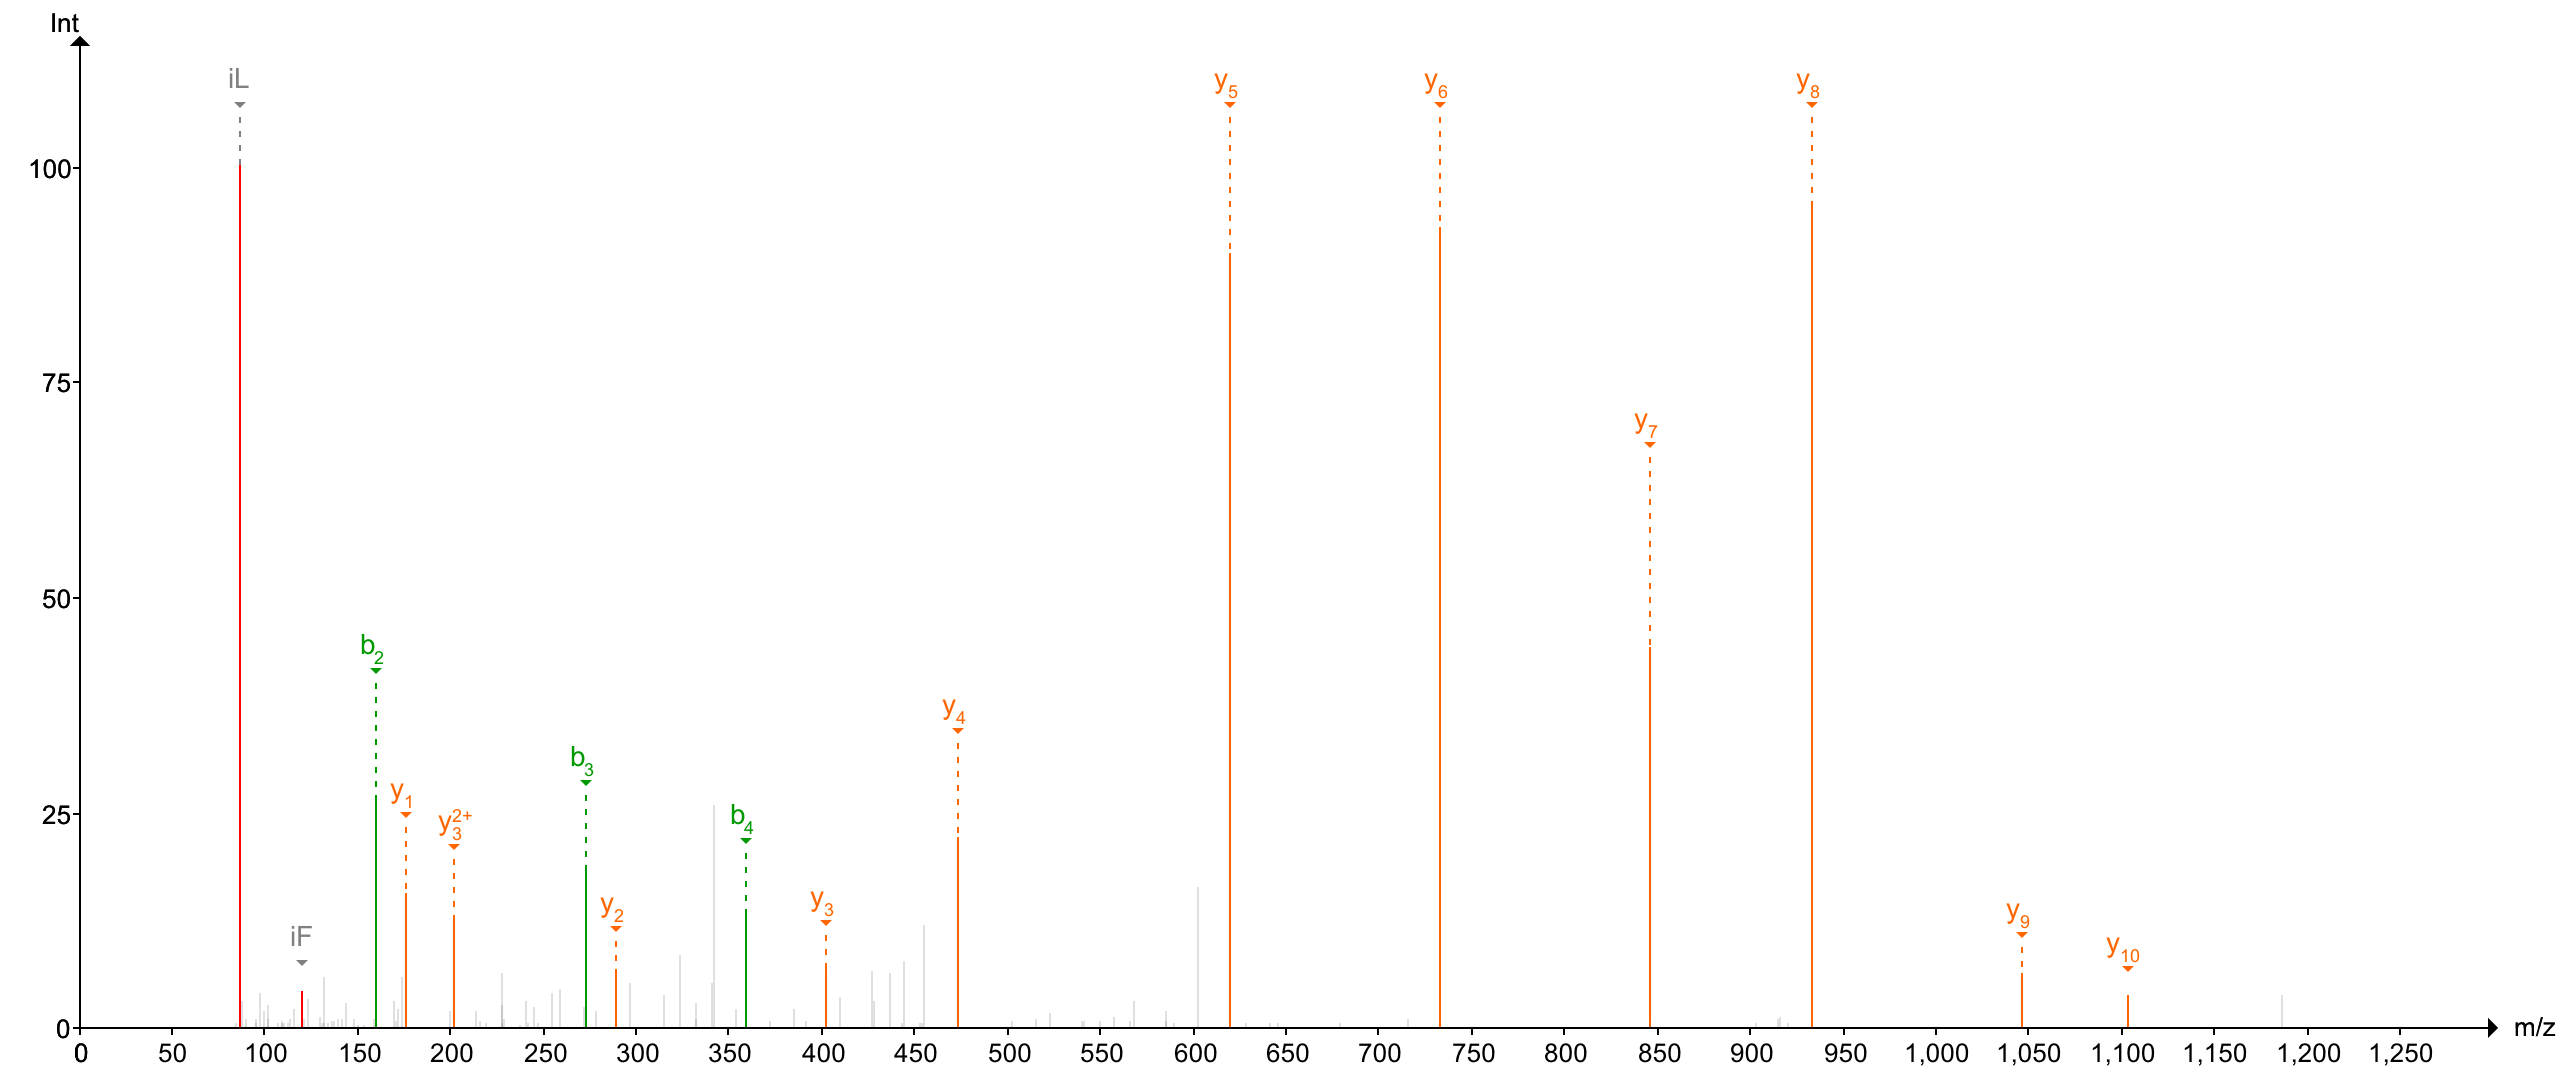

NH<sub>2</sub>-F<sup>y<sub>9</sub></sup>S<sup>y<sub>8</sub></sup>G<sup>y<sub>7</sub></sup>S<sup>y<sub>6</sub></sup>S<sup>y<sub>5</sub></sup>S<sup>y<sub>4</sub></sup>G A D<sup>y<sub>1</sub></sup>R-COOH  
b<sub>2</sub>

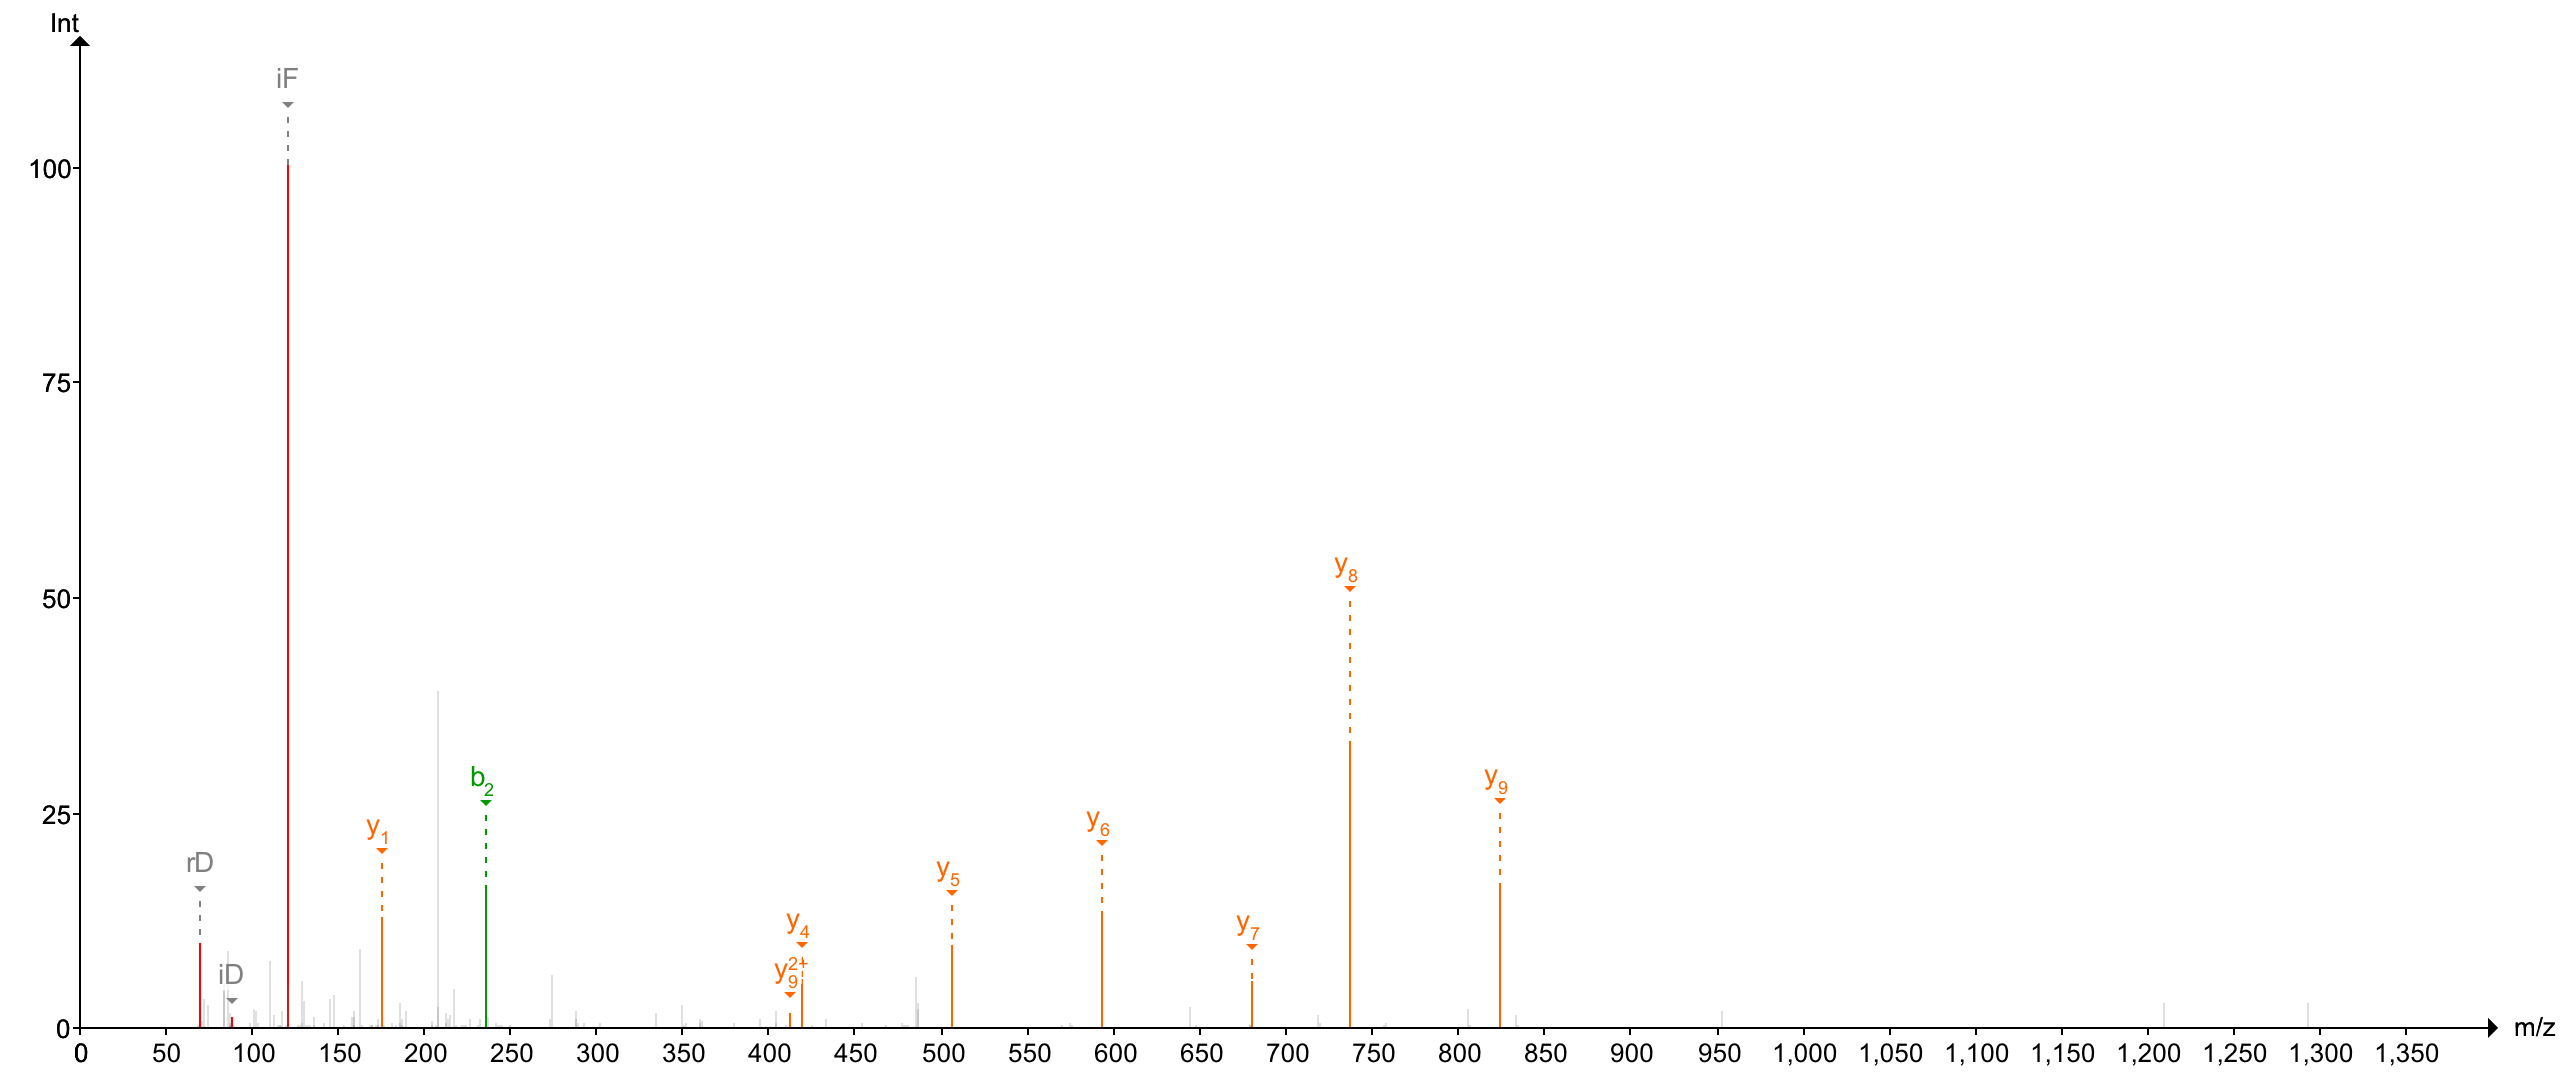

NH<sub>2</sub>-R<sup>y<sub>8</sub></sup>Y<sup>y<sub>7</sub></sup>G<sup>b<sub>2</sub></sup>A<sup>y<sub>5</sub></sup>H<sup>y<sub>4</sub></sup>A S L<sup>y<sub>1</sub></sup>R-COOH

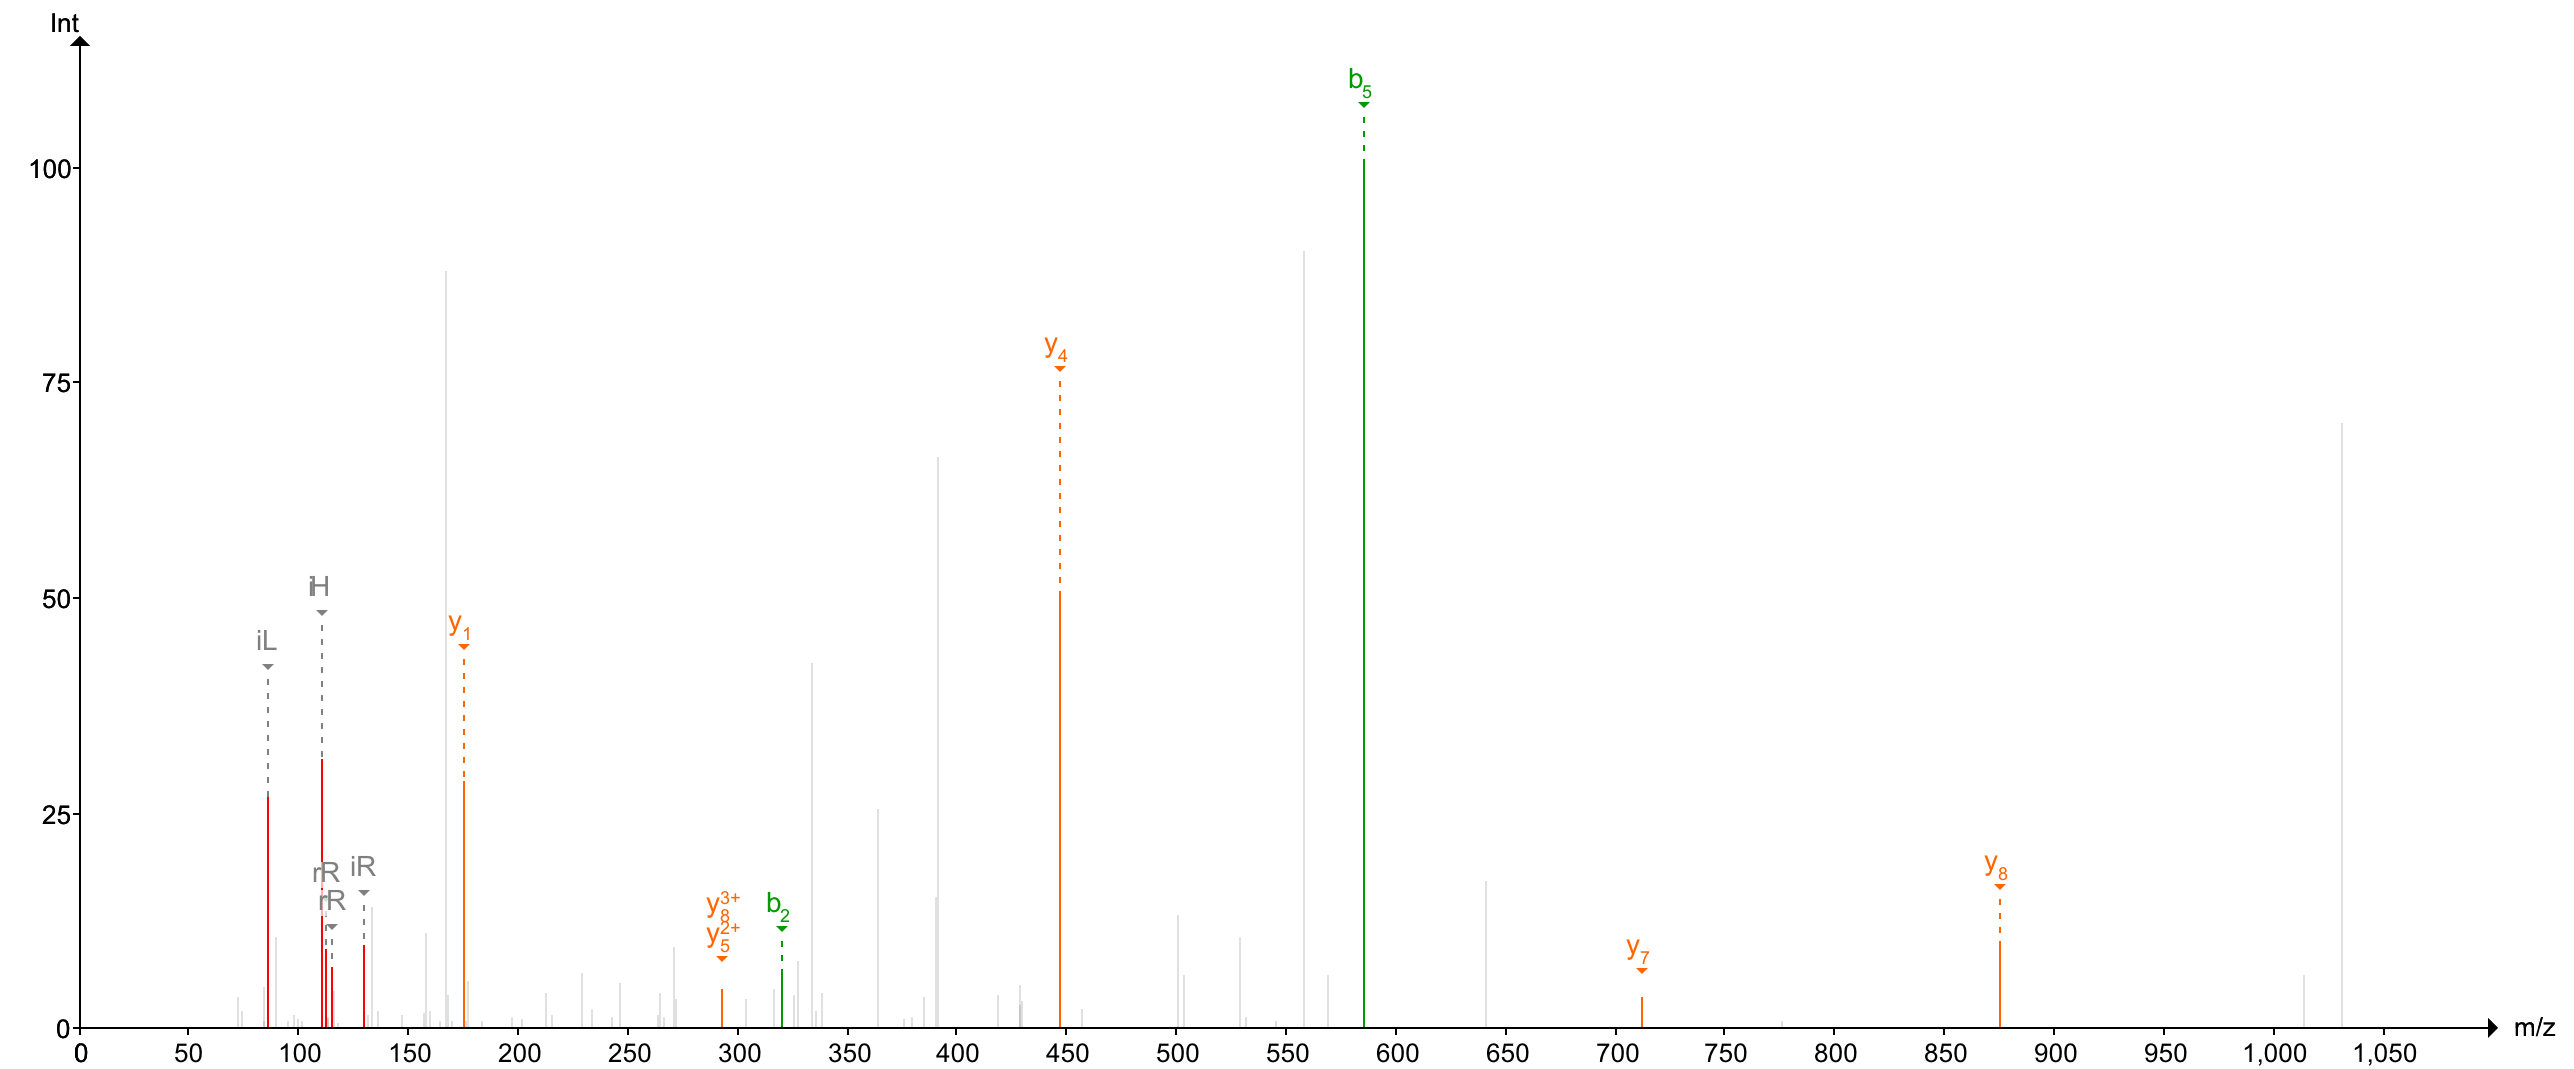



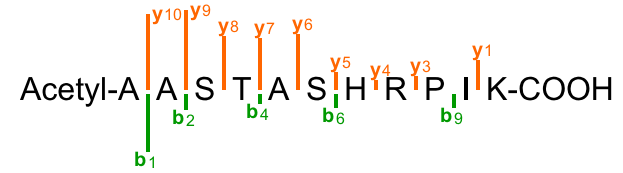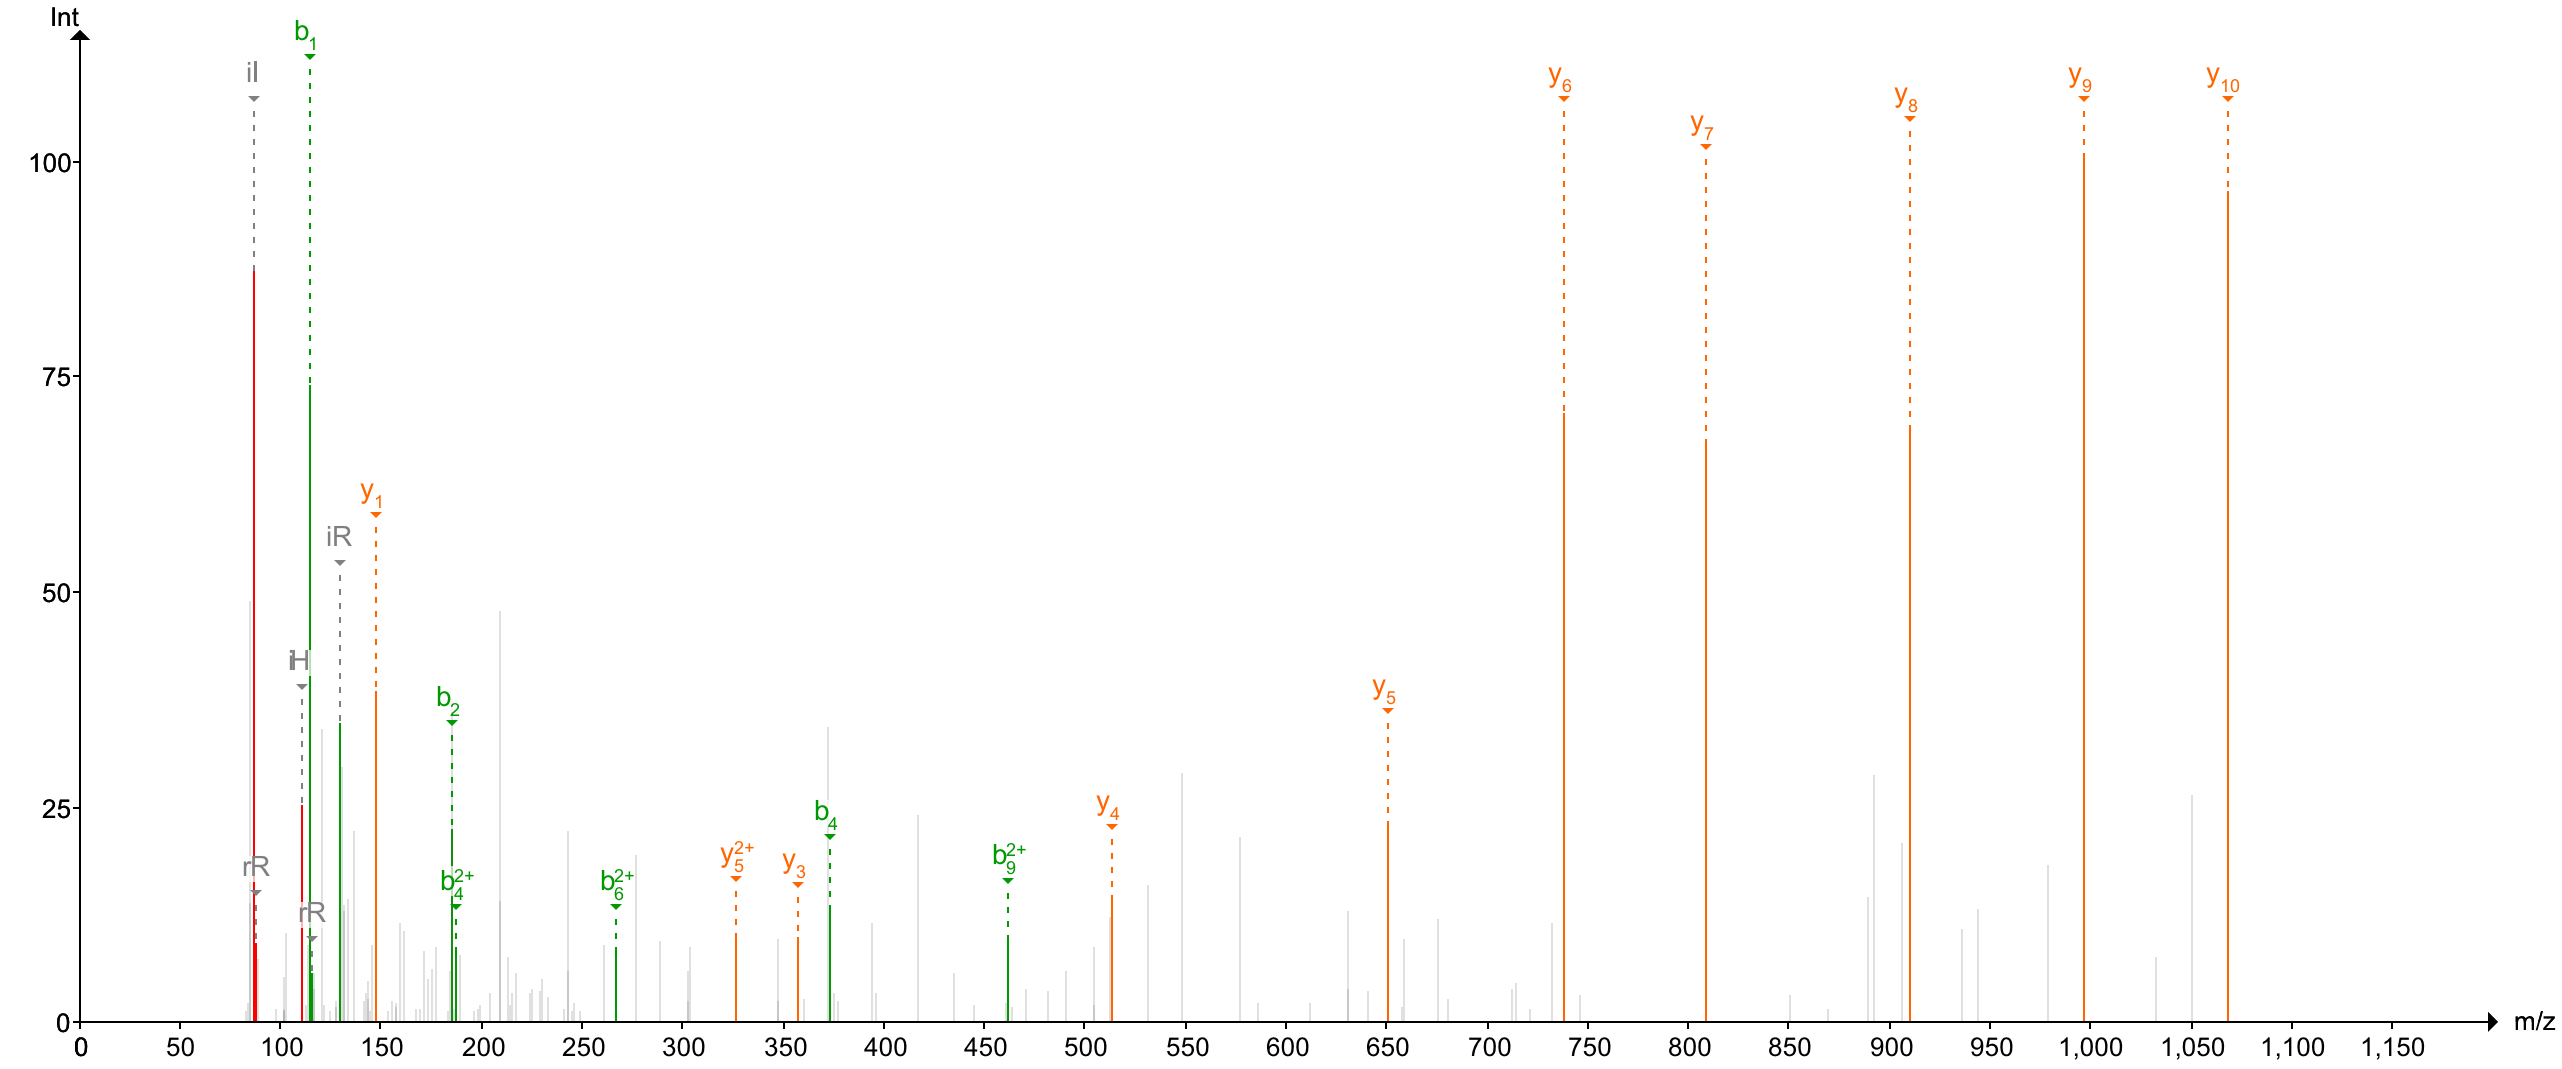

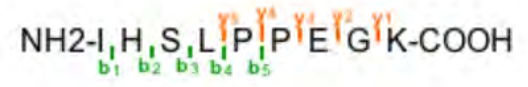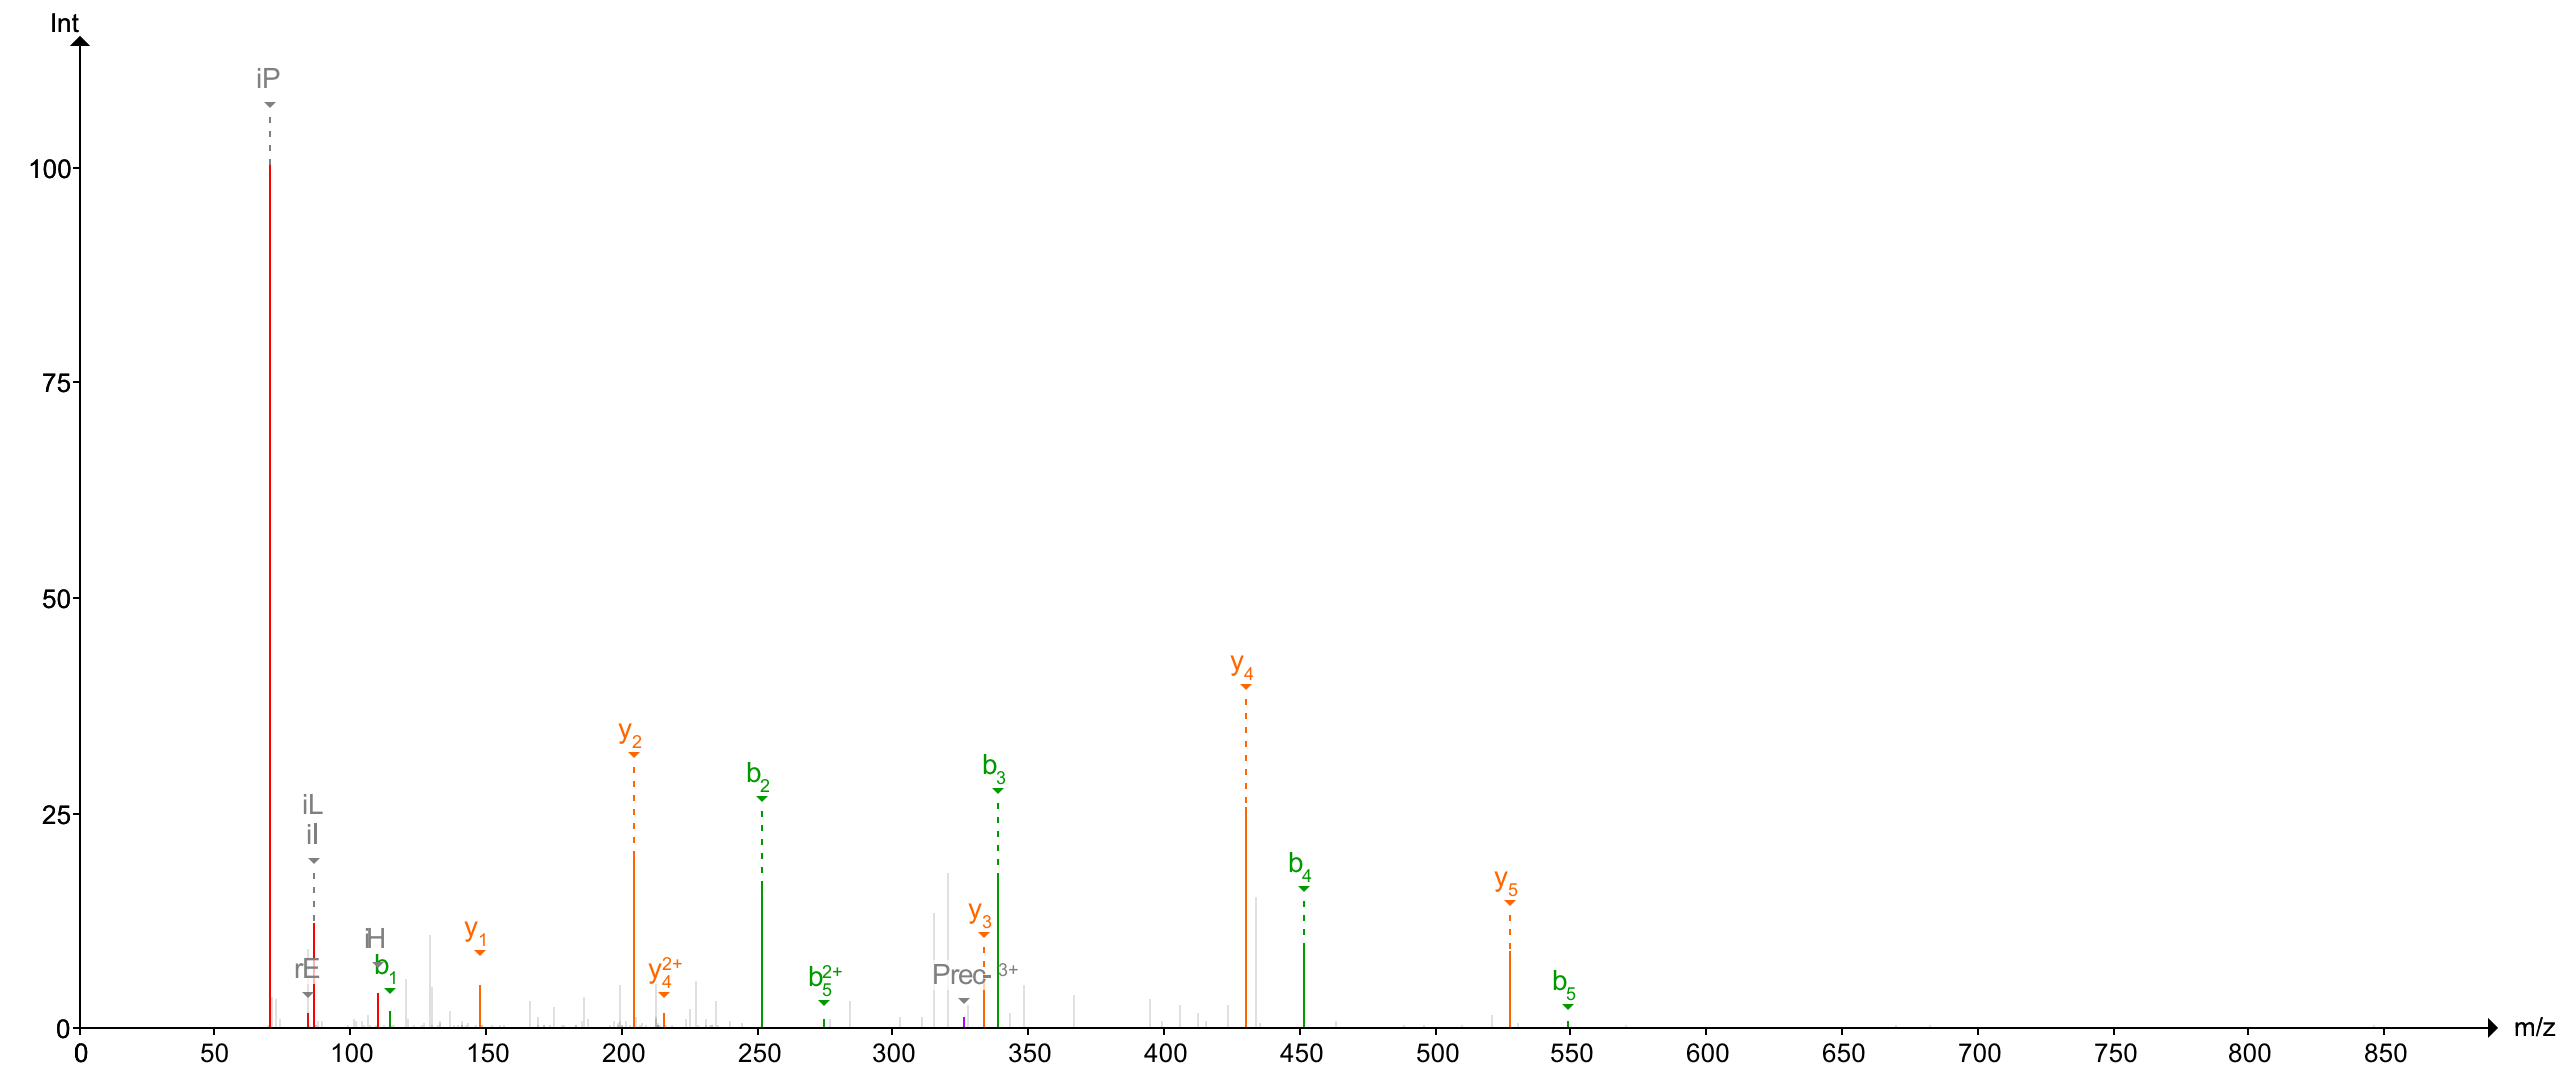

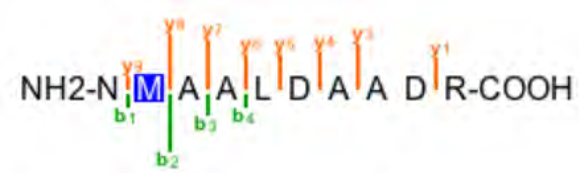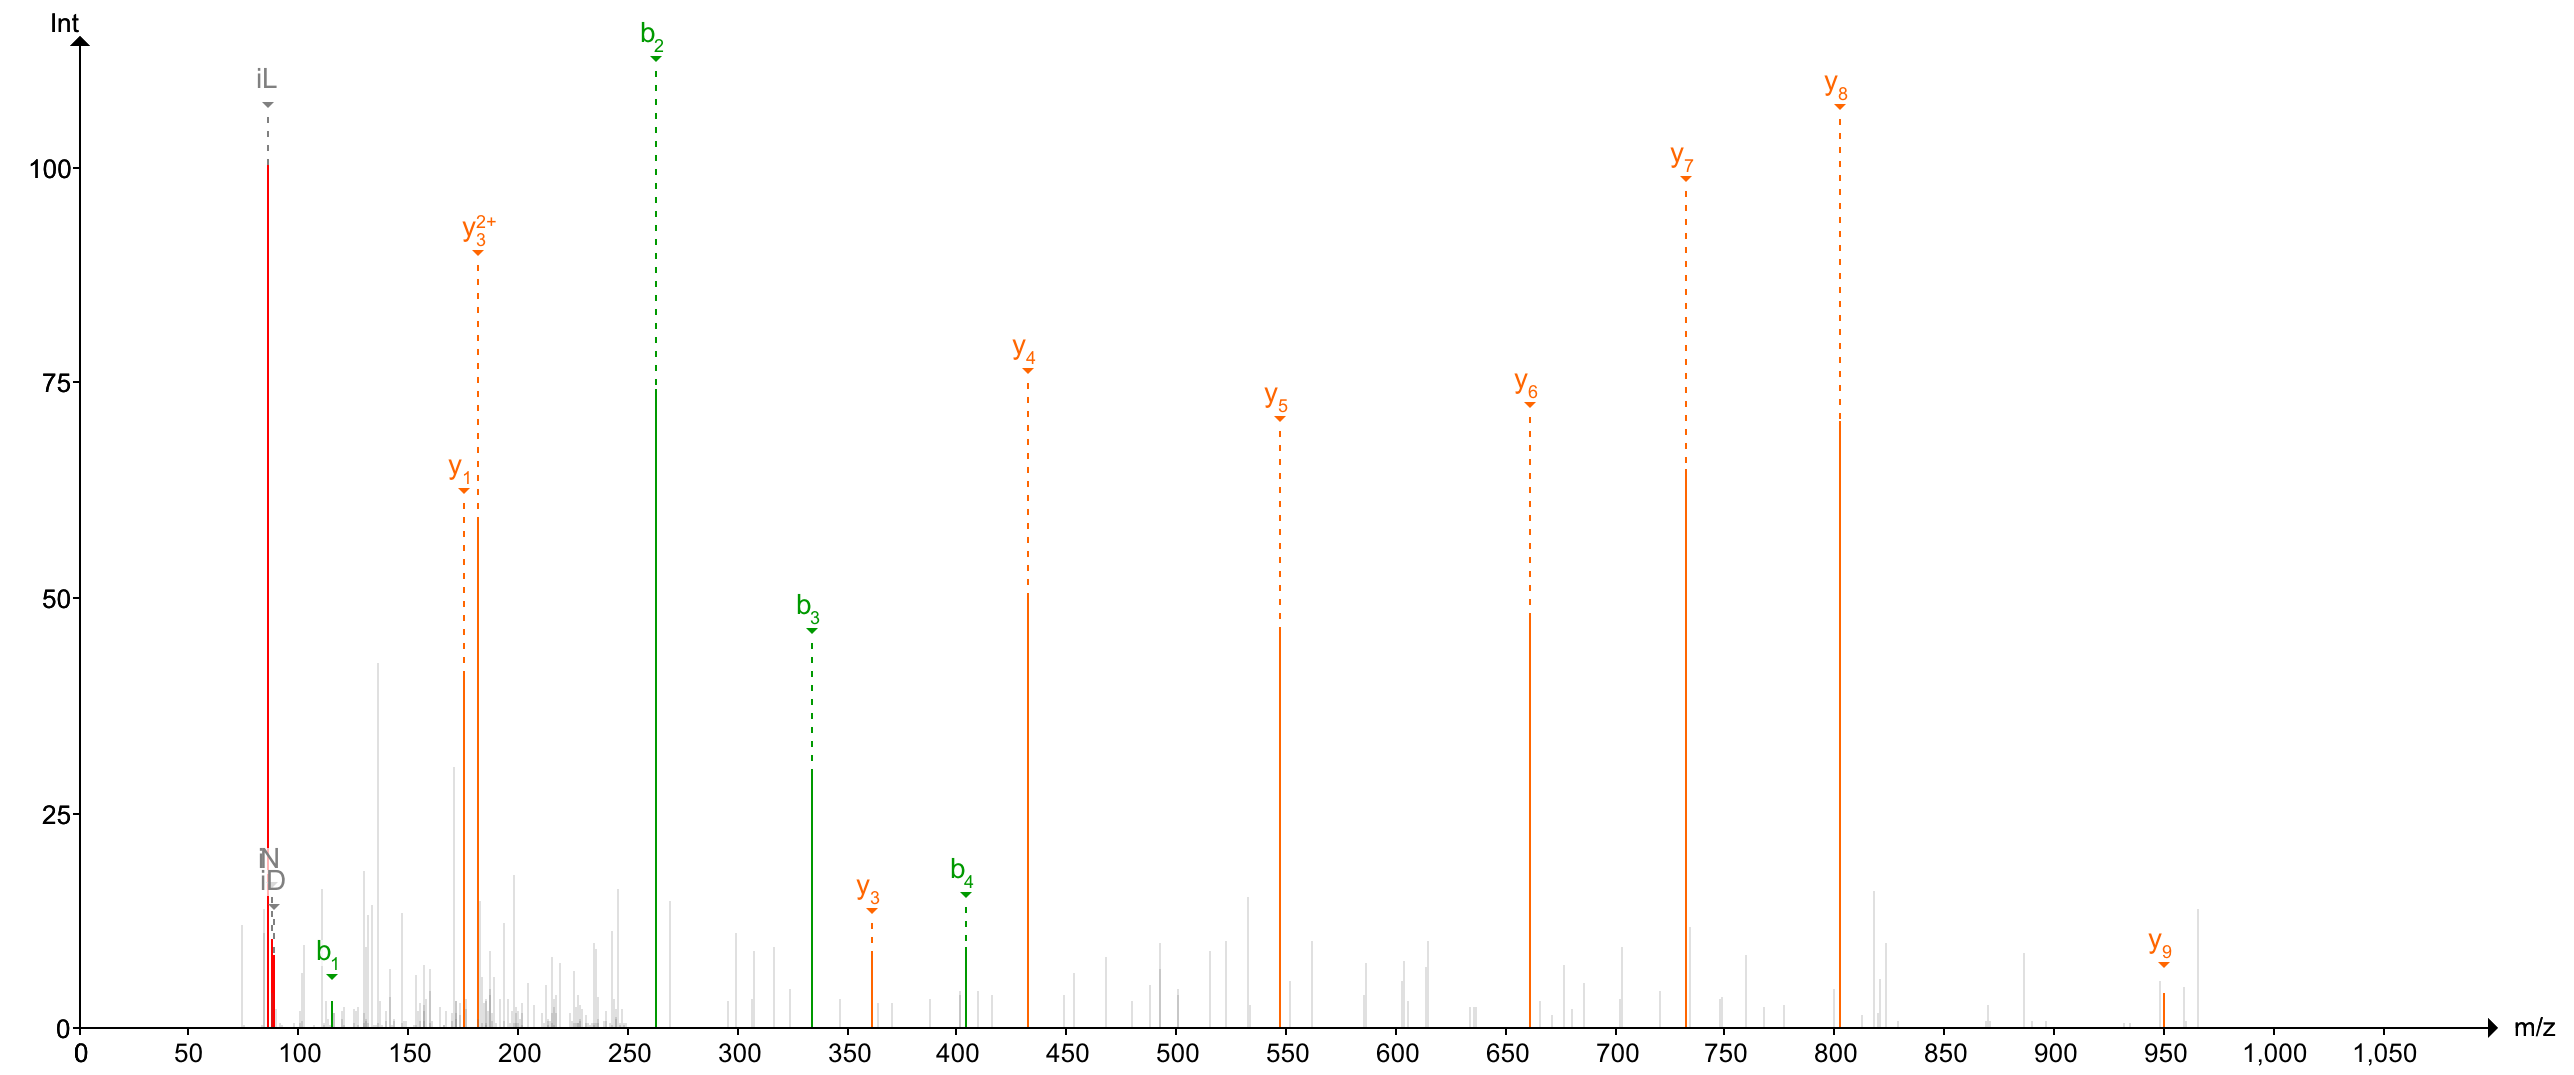

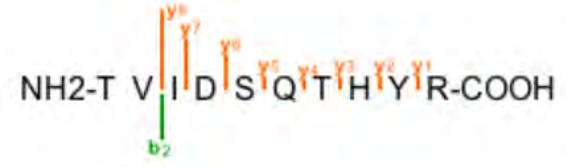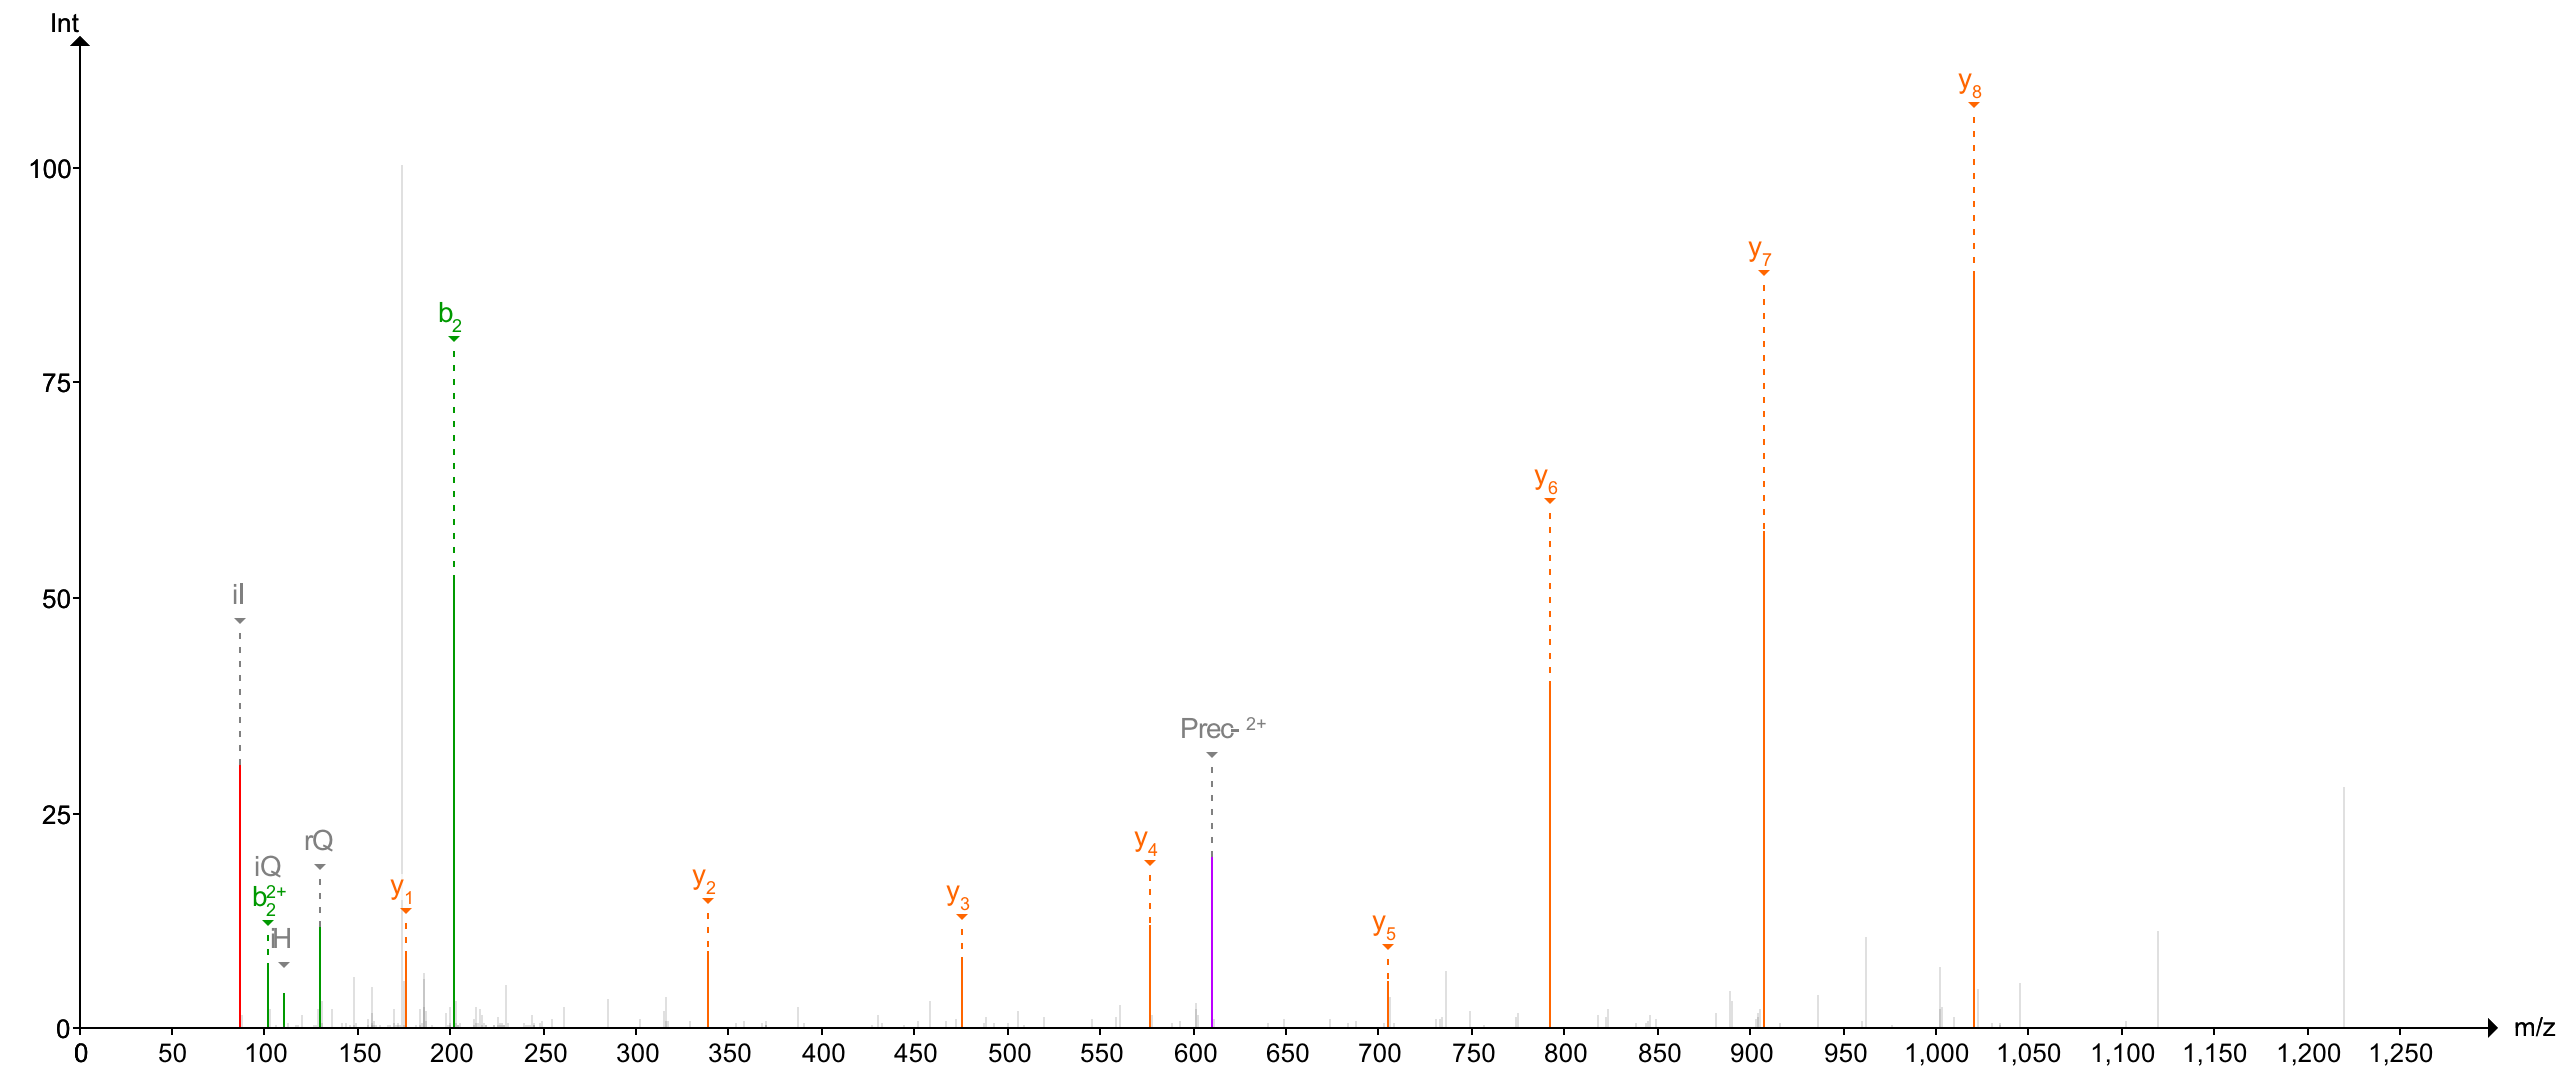

NH<sub>2</sub>-L V Q T A A Q Q V A E D K-COOH

y<sub>11</sub> y<sub>10</sub> y<sub>9</sub> y<sub>8</sub> y<sub>7</sub> y<sub>6</sub> y<sub>5</sub> y<sub>4</sub> y<sub>3</sub> y<sub>2</sub> y<sub>1</sub>  
b<sub>2</sub> b<sub>3</sub> b<sub>4</sub> b<sub>5</sub>

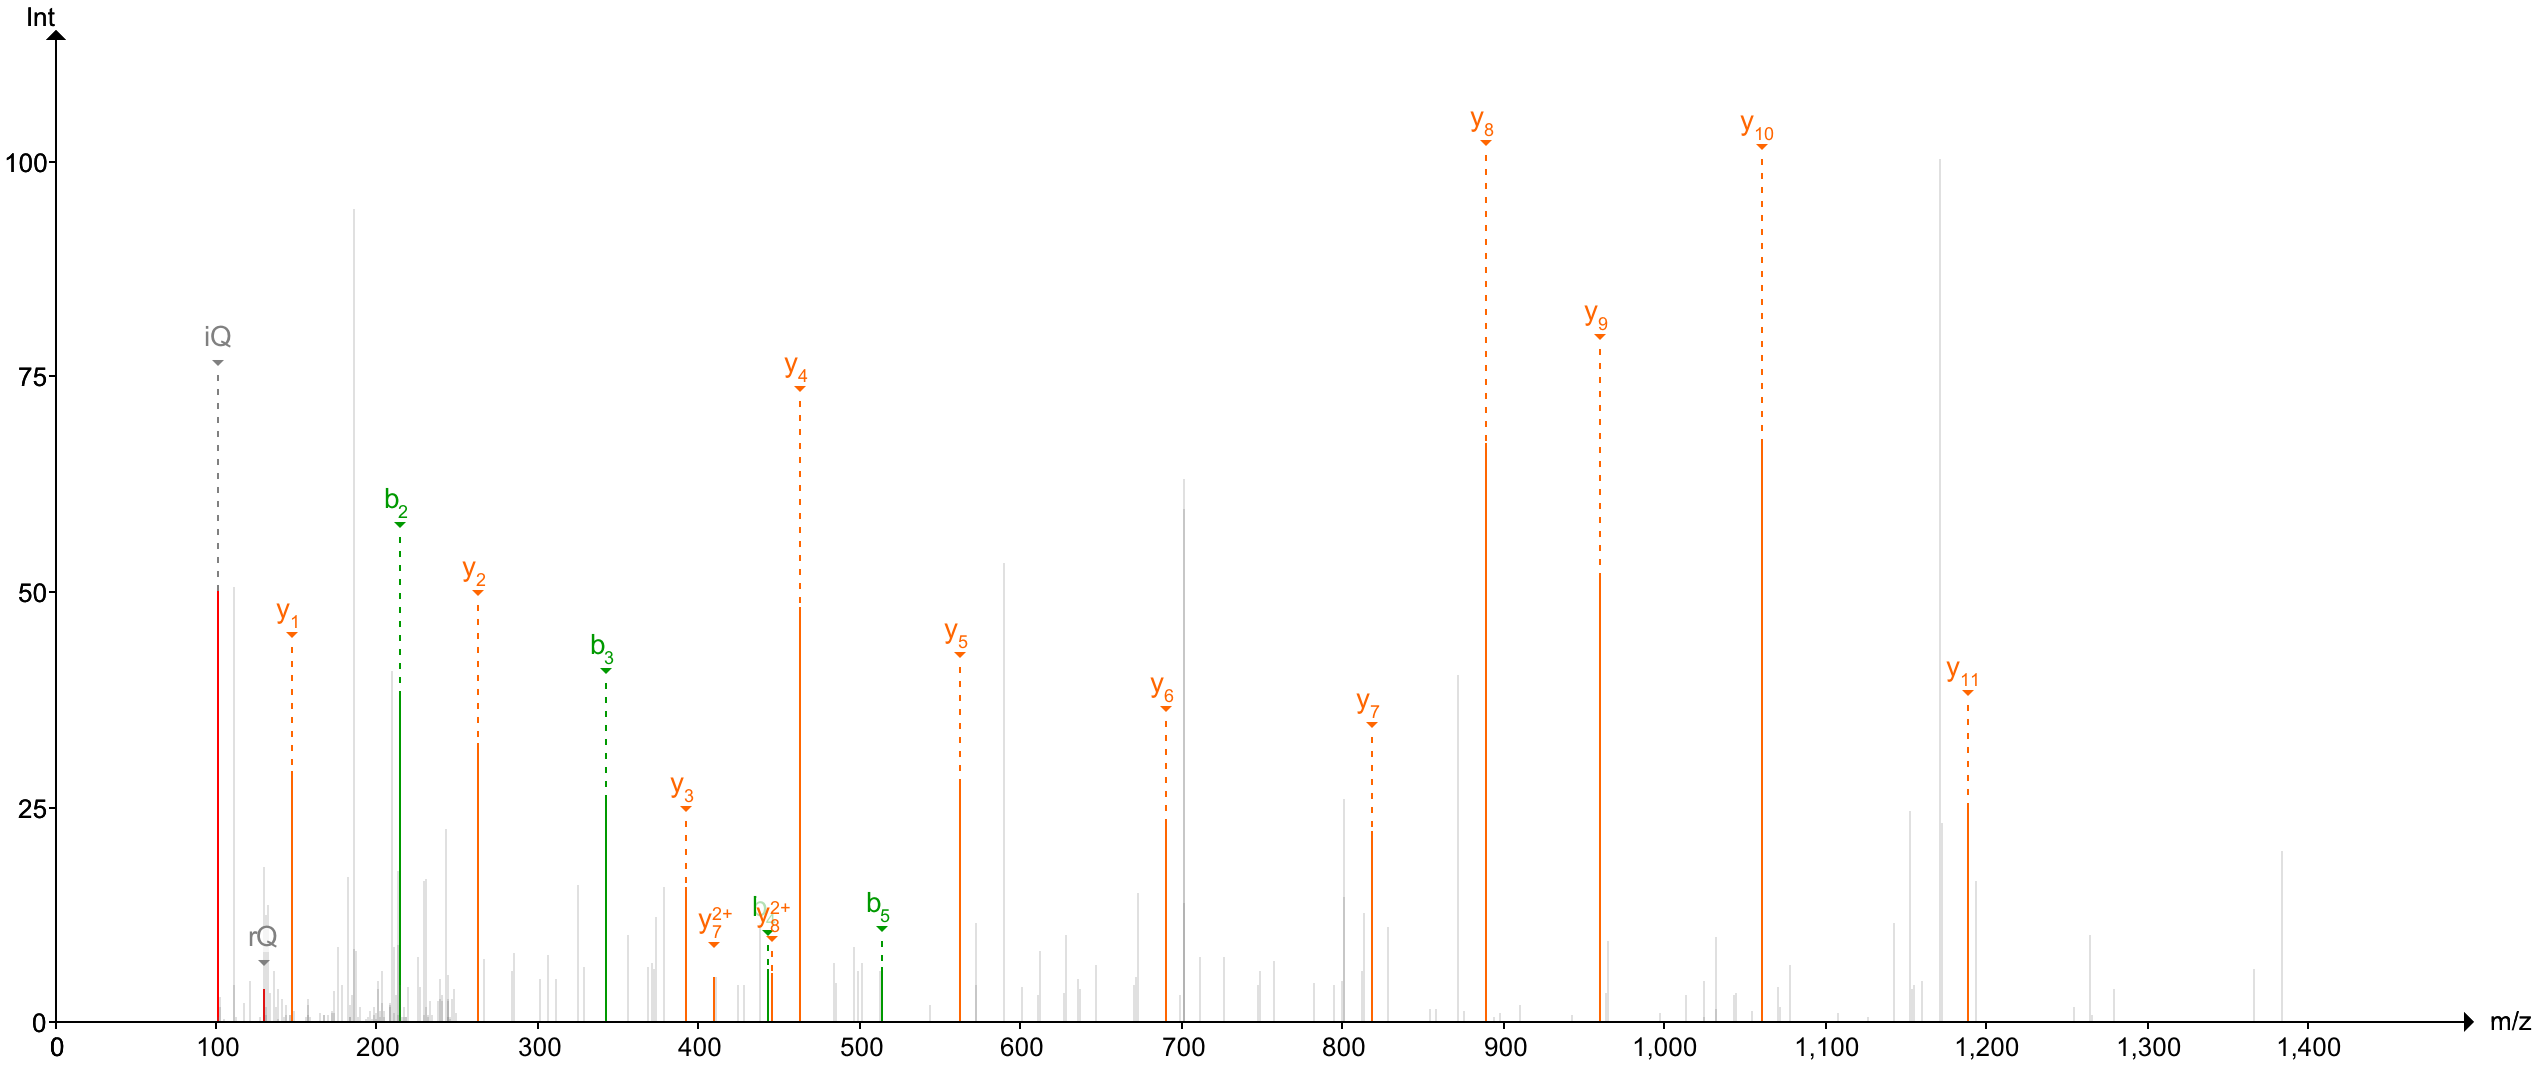

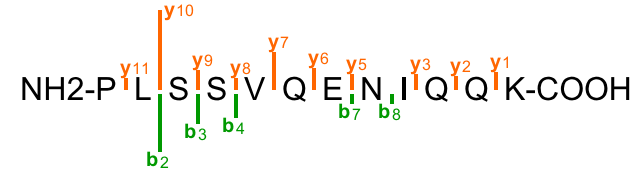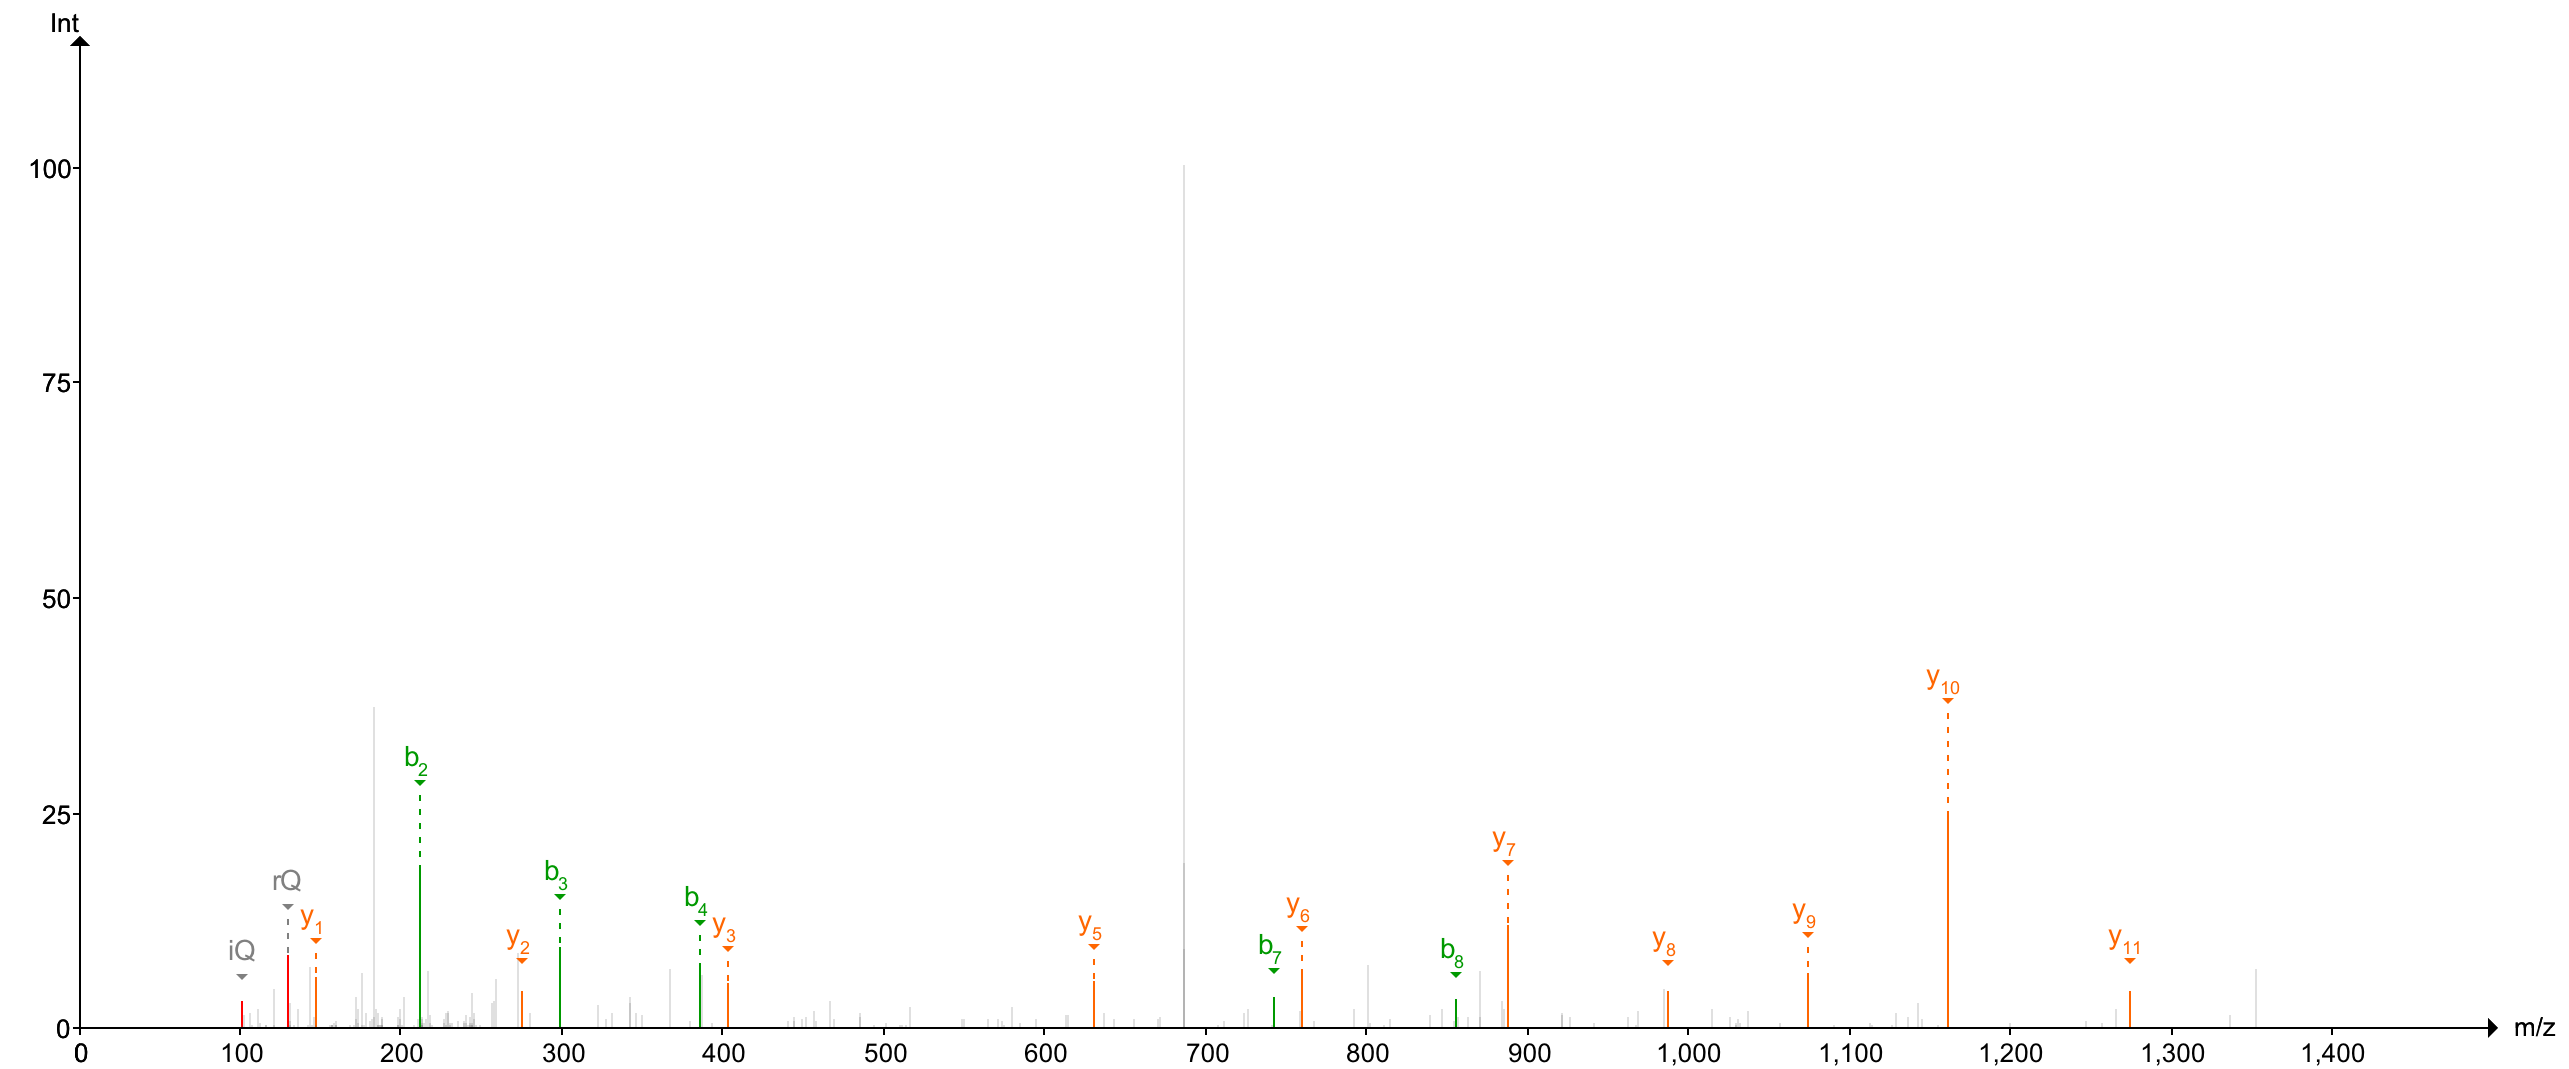

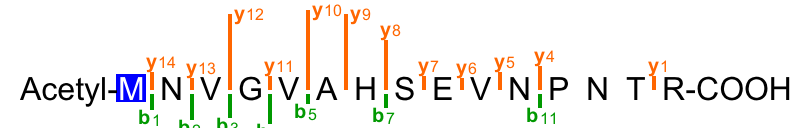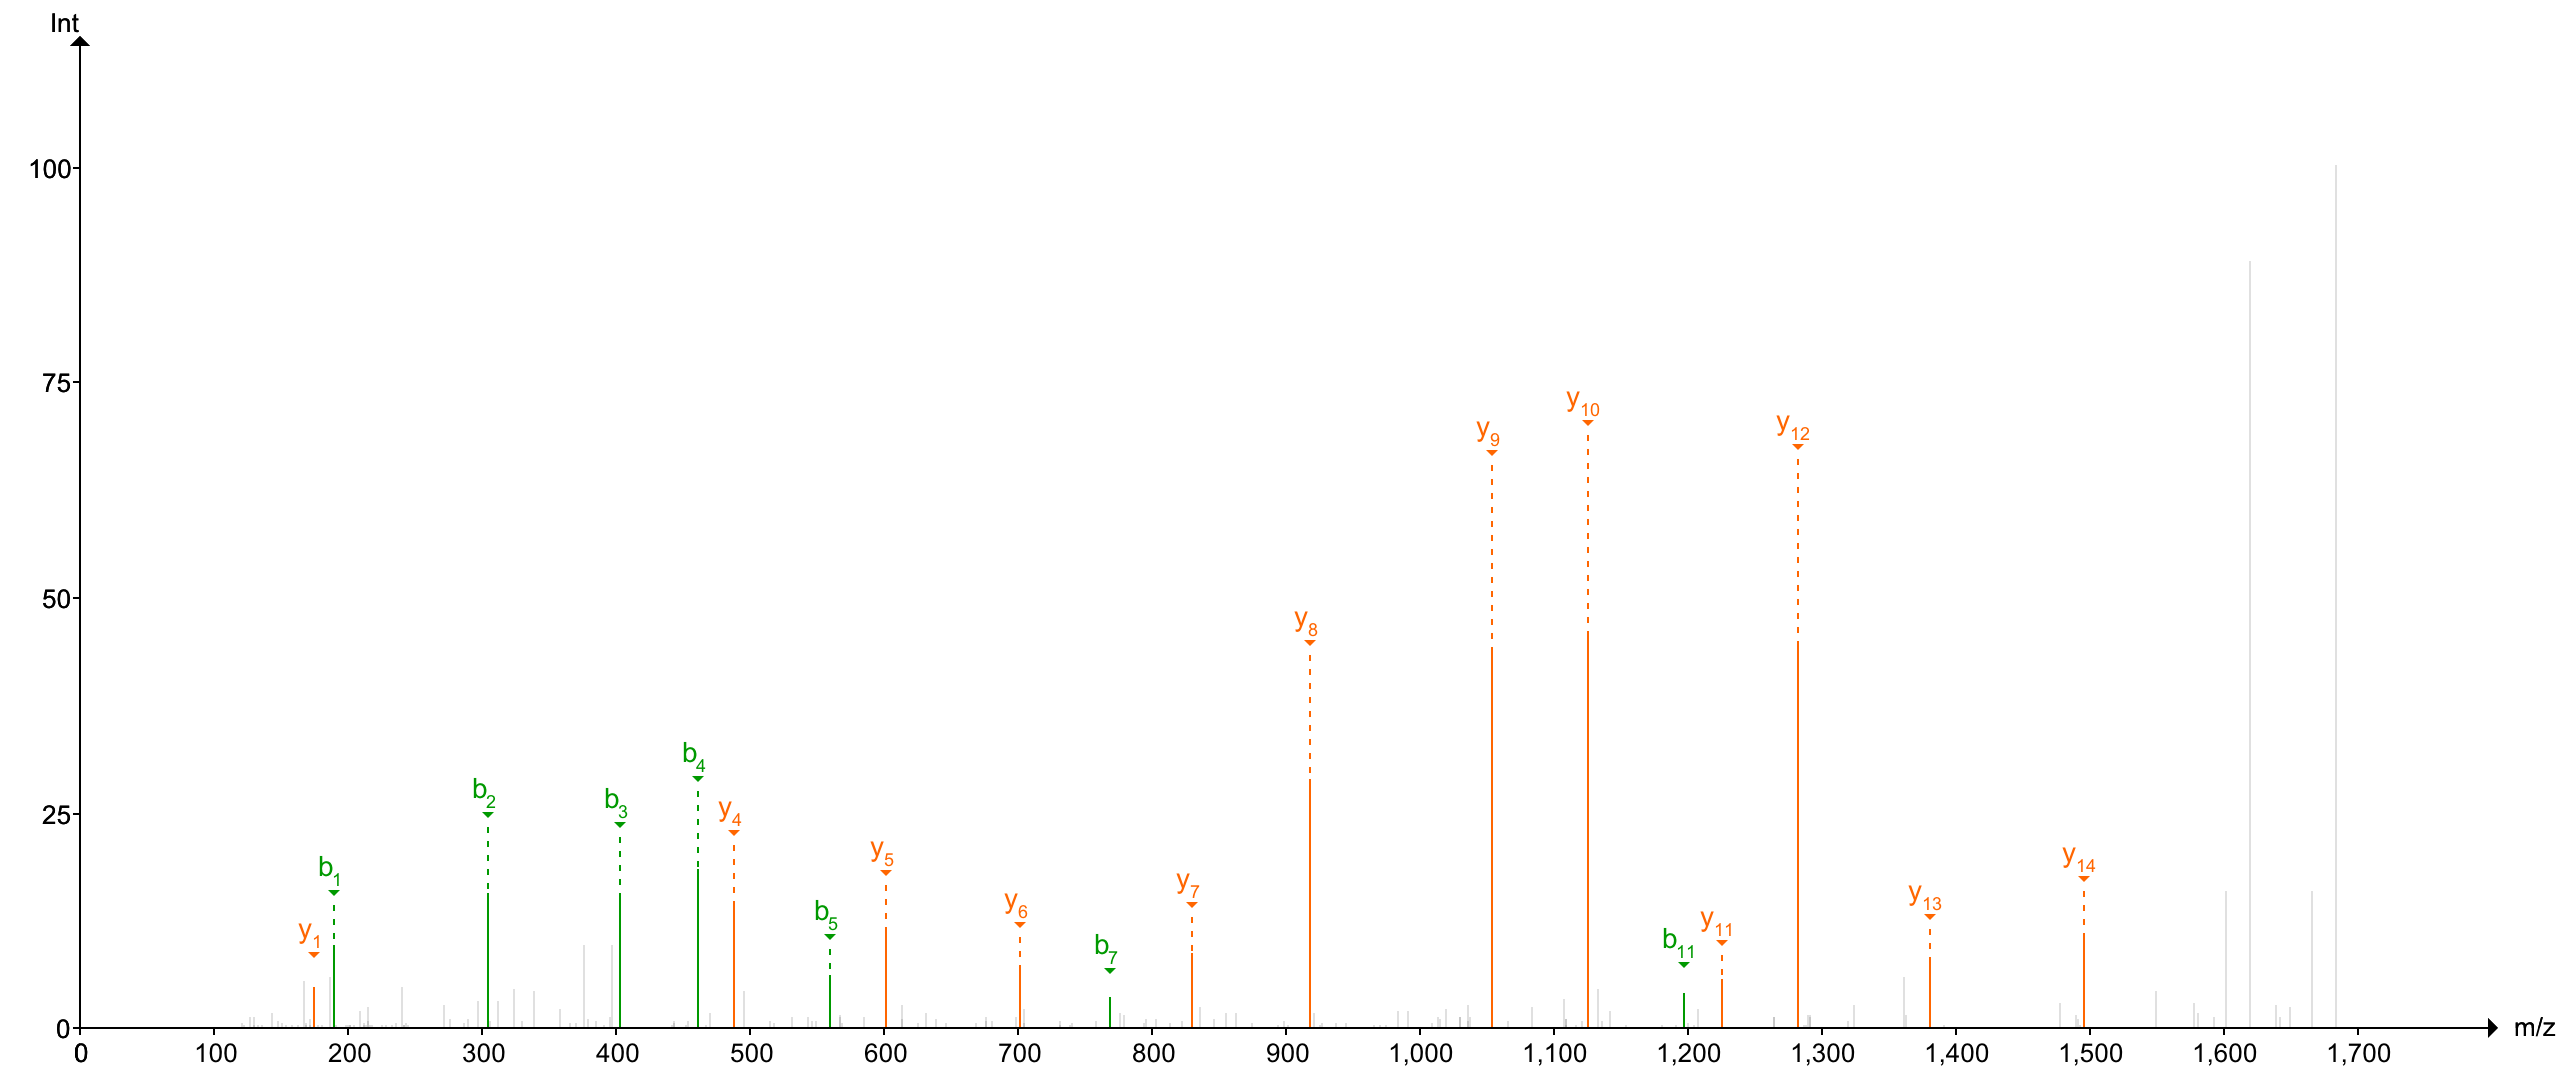

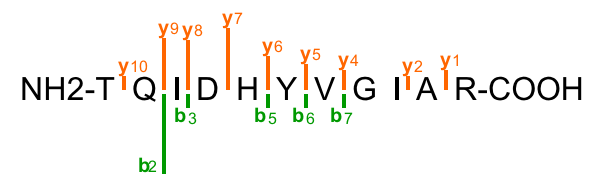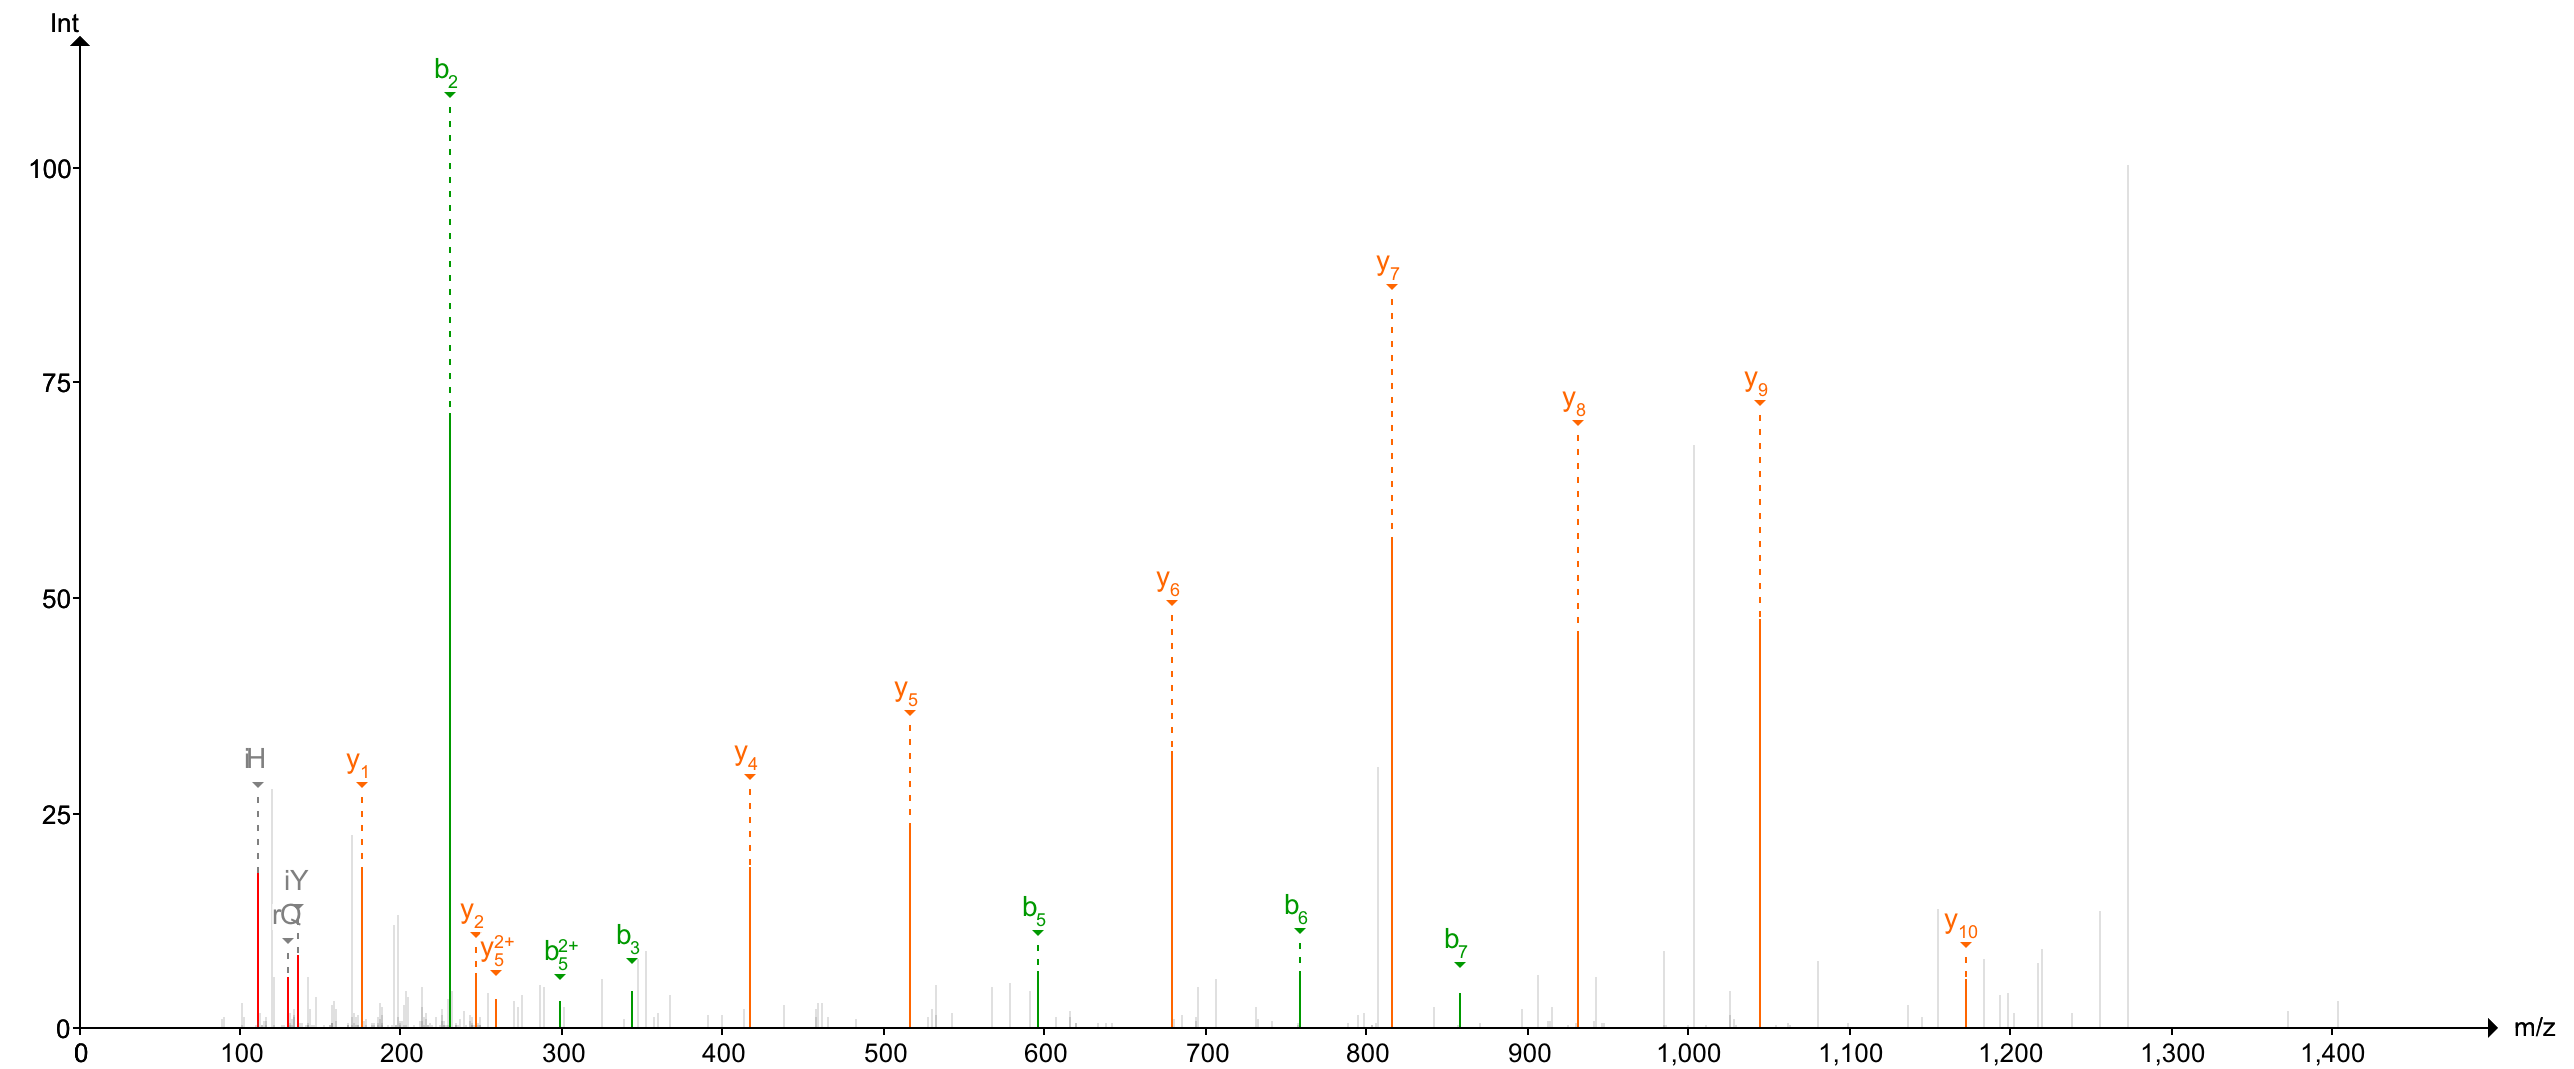



NH<sub>2</sub>-L E<sub>1</sub> T<sub>1</sub> L<sub>1</sub> A<sub>1</sub> A<sub>1</sub> Q E A A **M** K-COOH

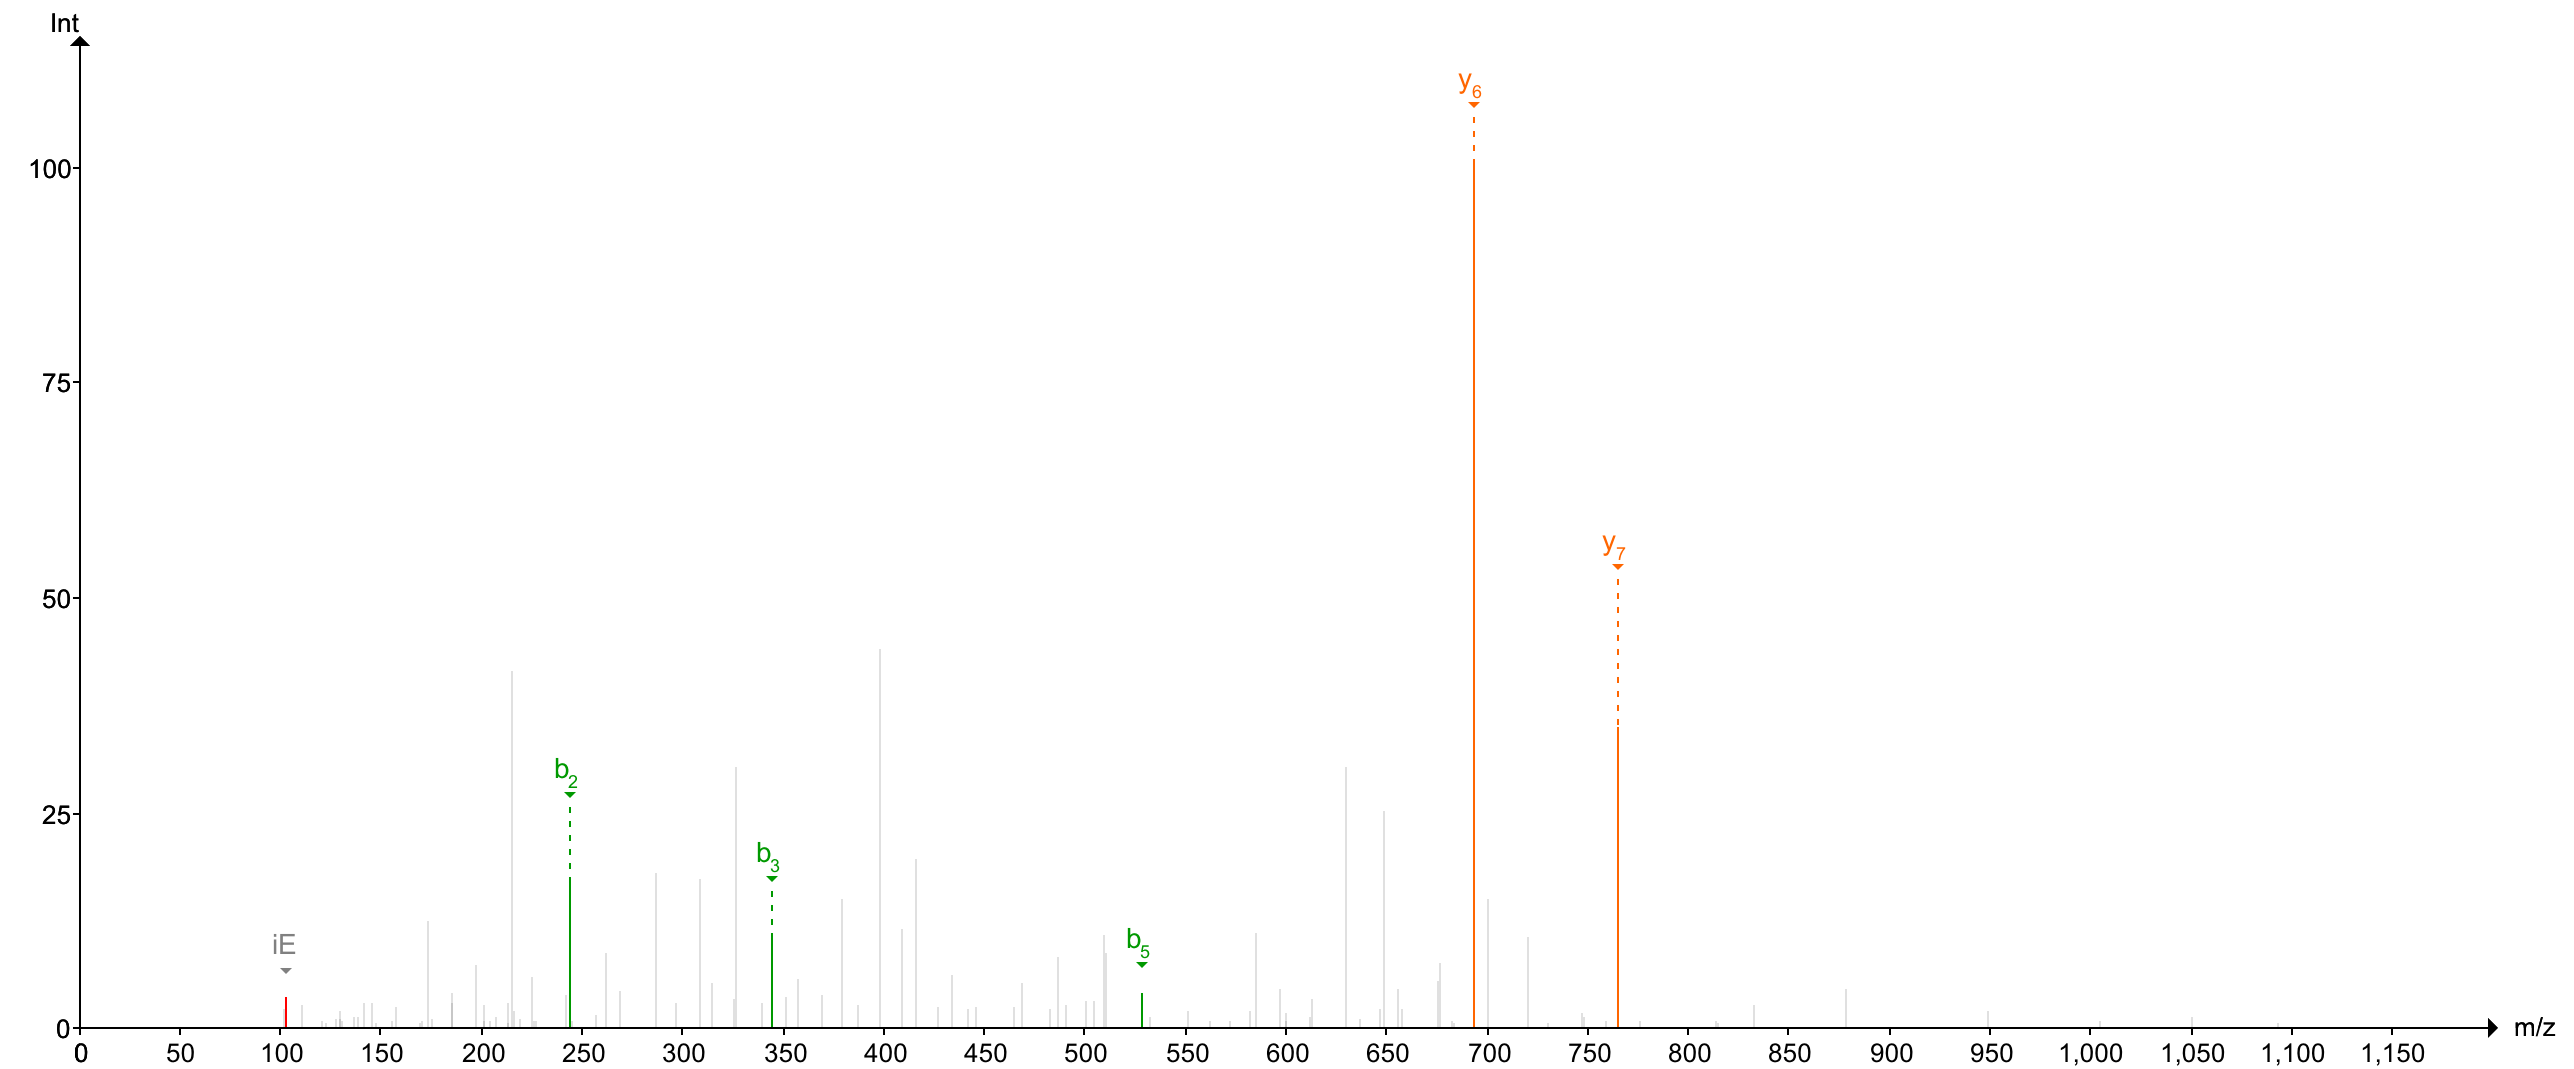

NH<sub>2</sub>-I I P K P E F P R-COOH

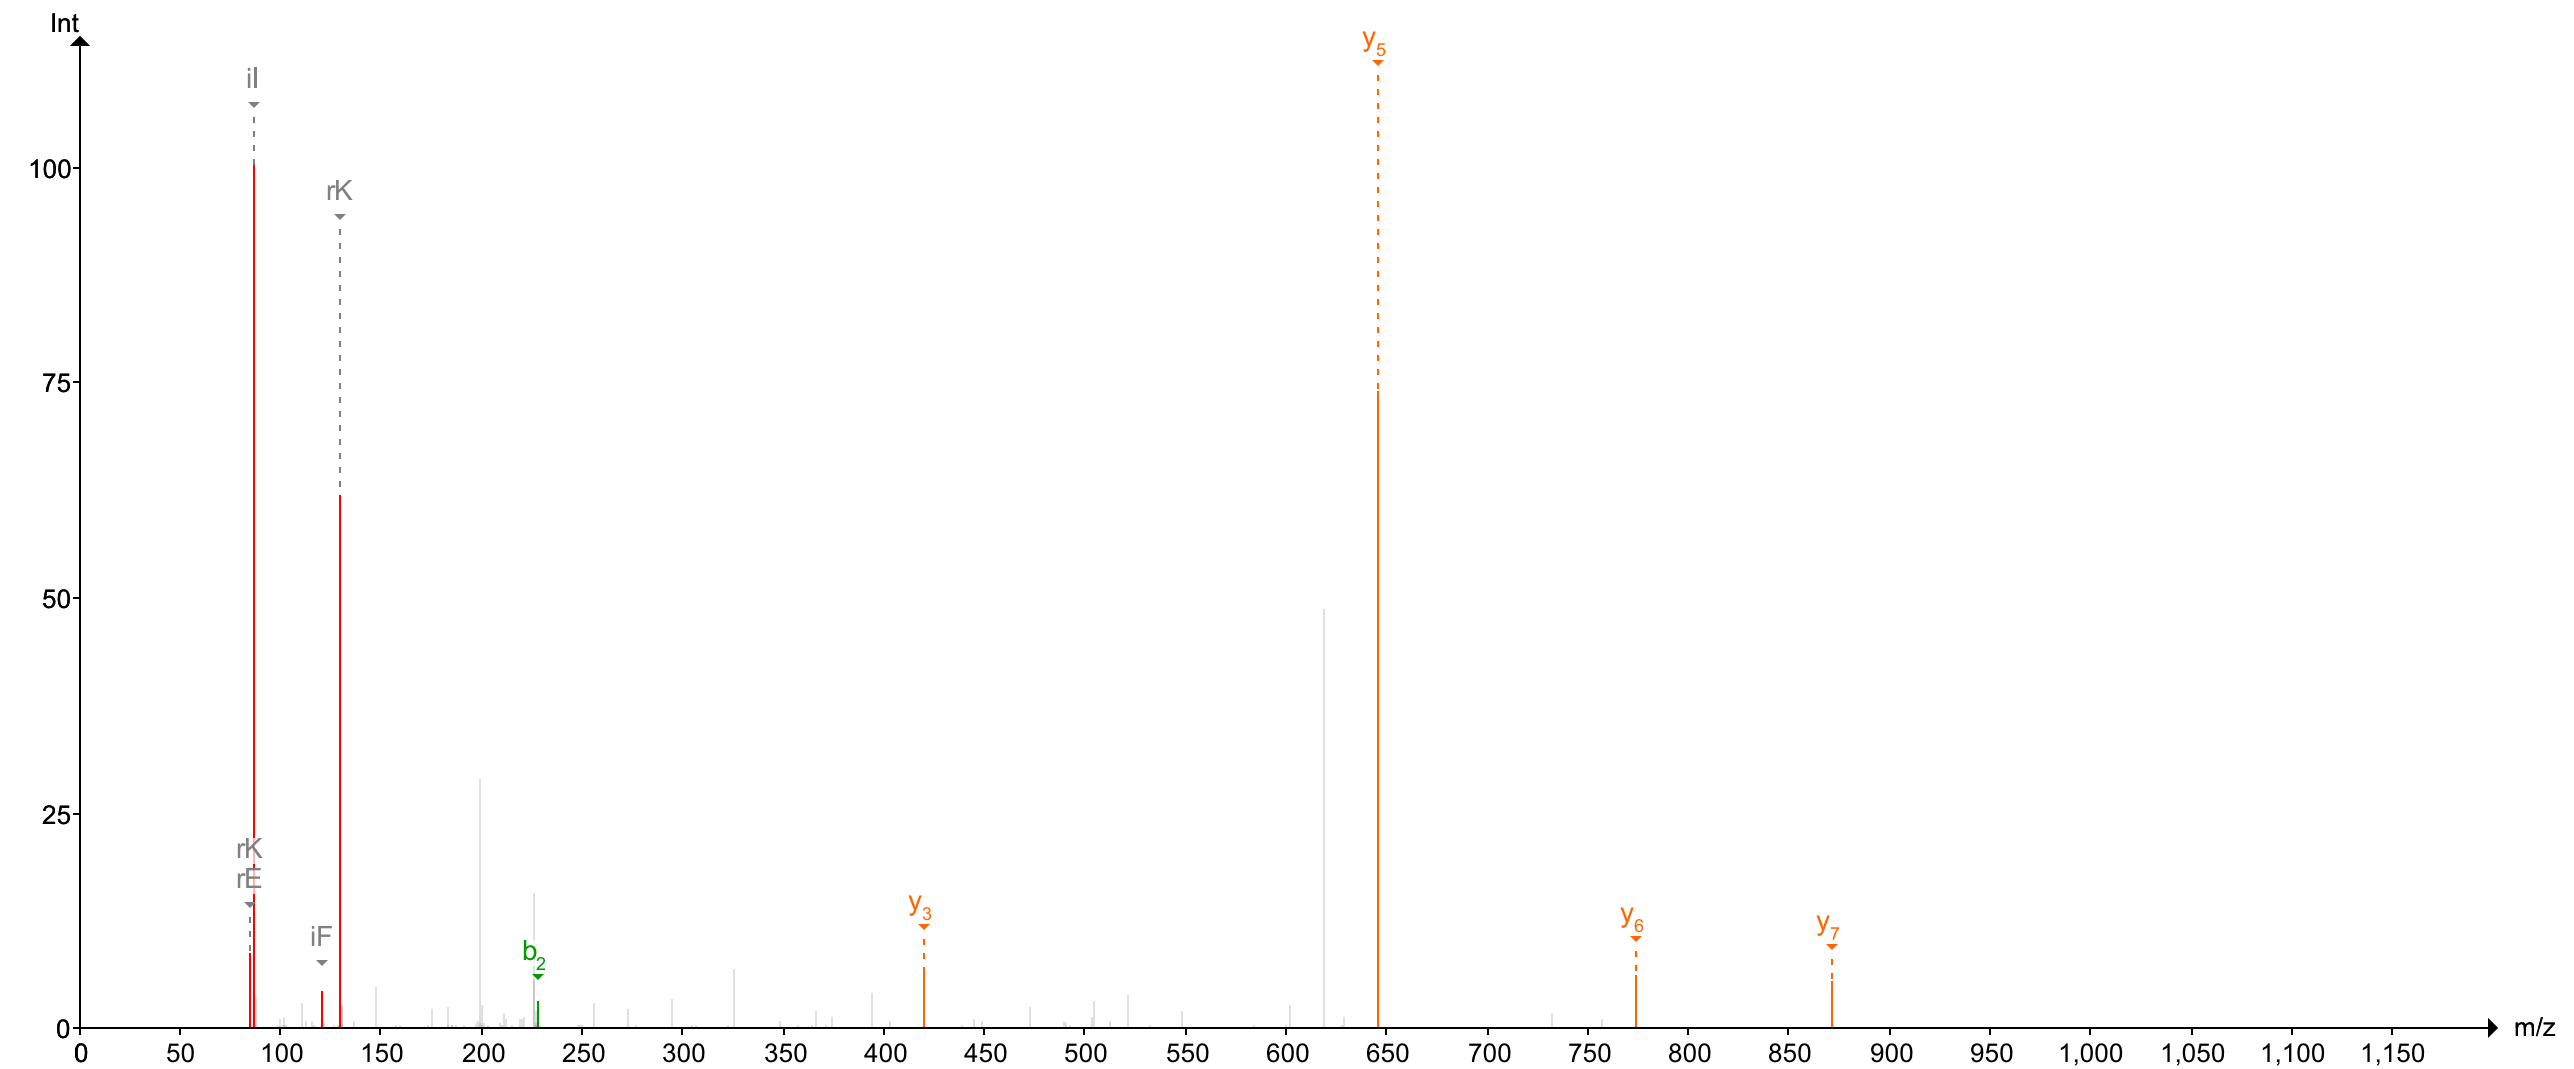

NH<sub>2</sub>-E I S S A A A H S Q P F A W K-COOH

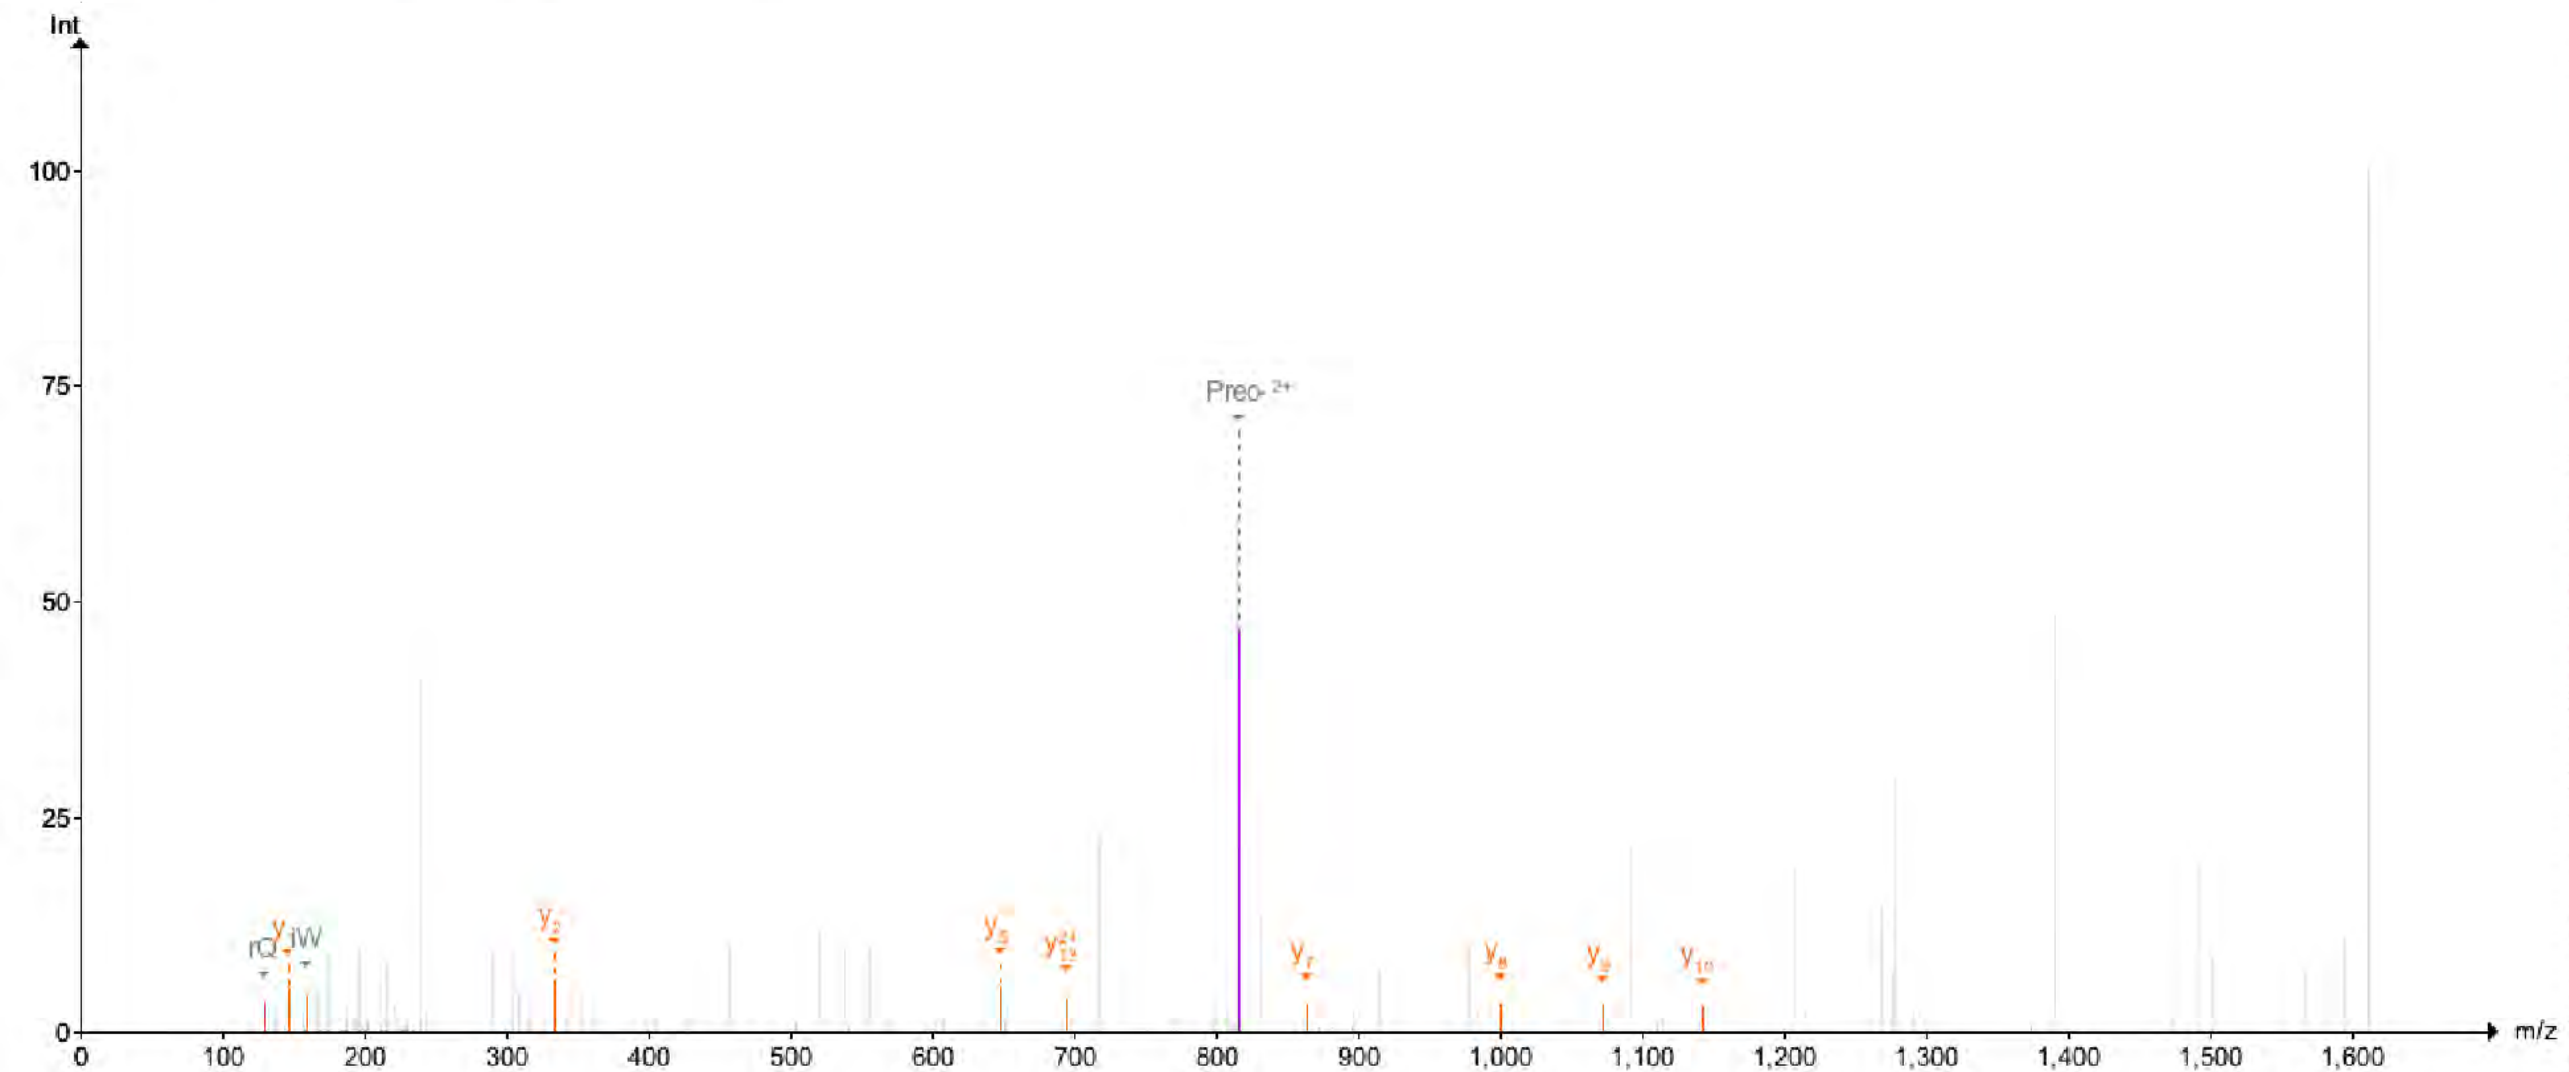

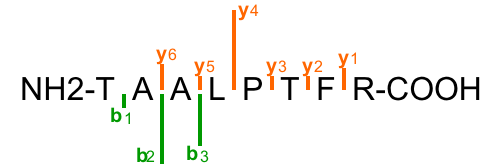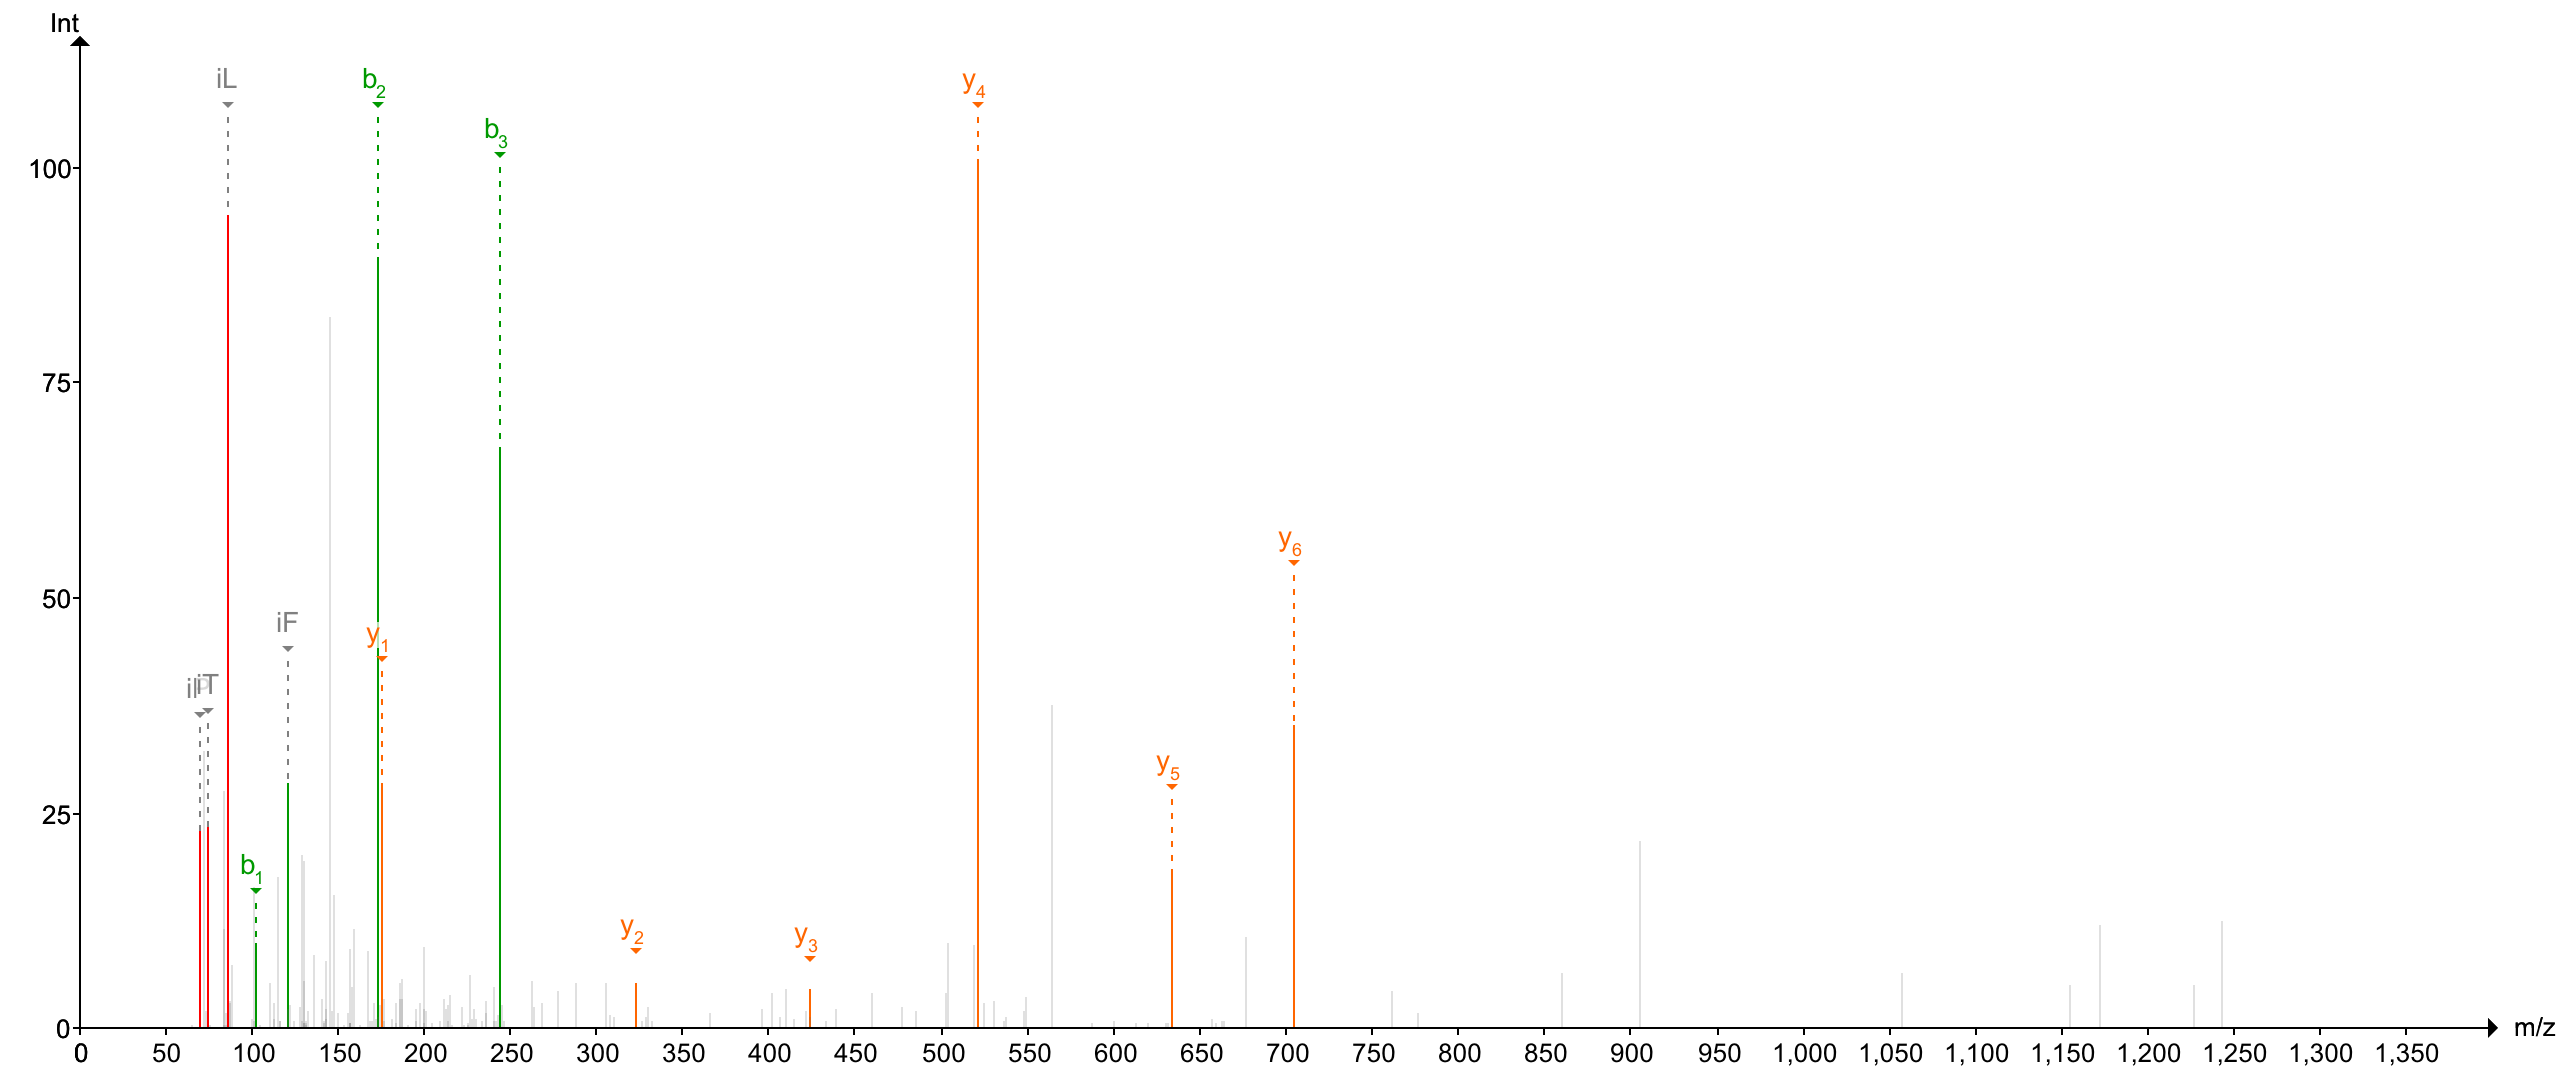

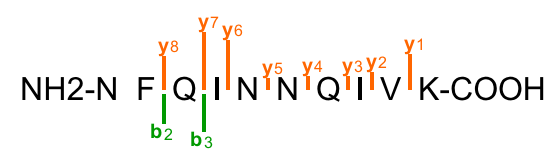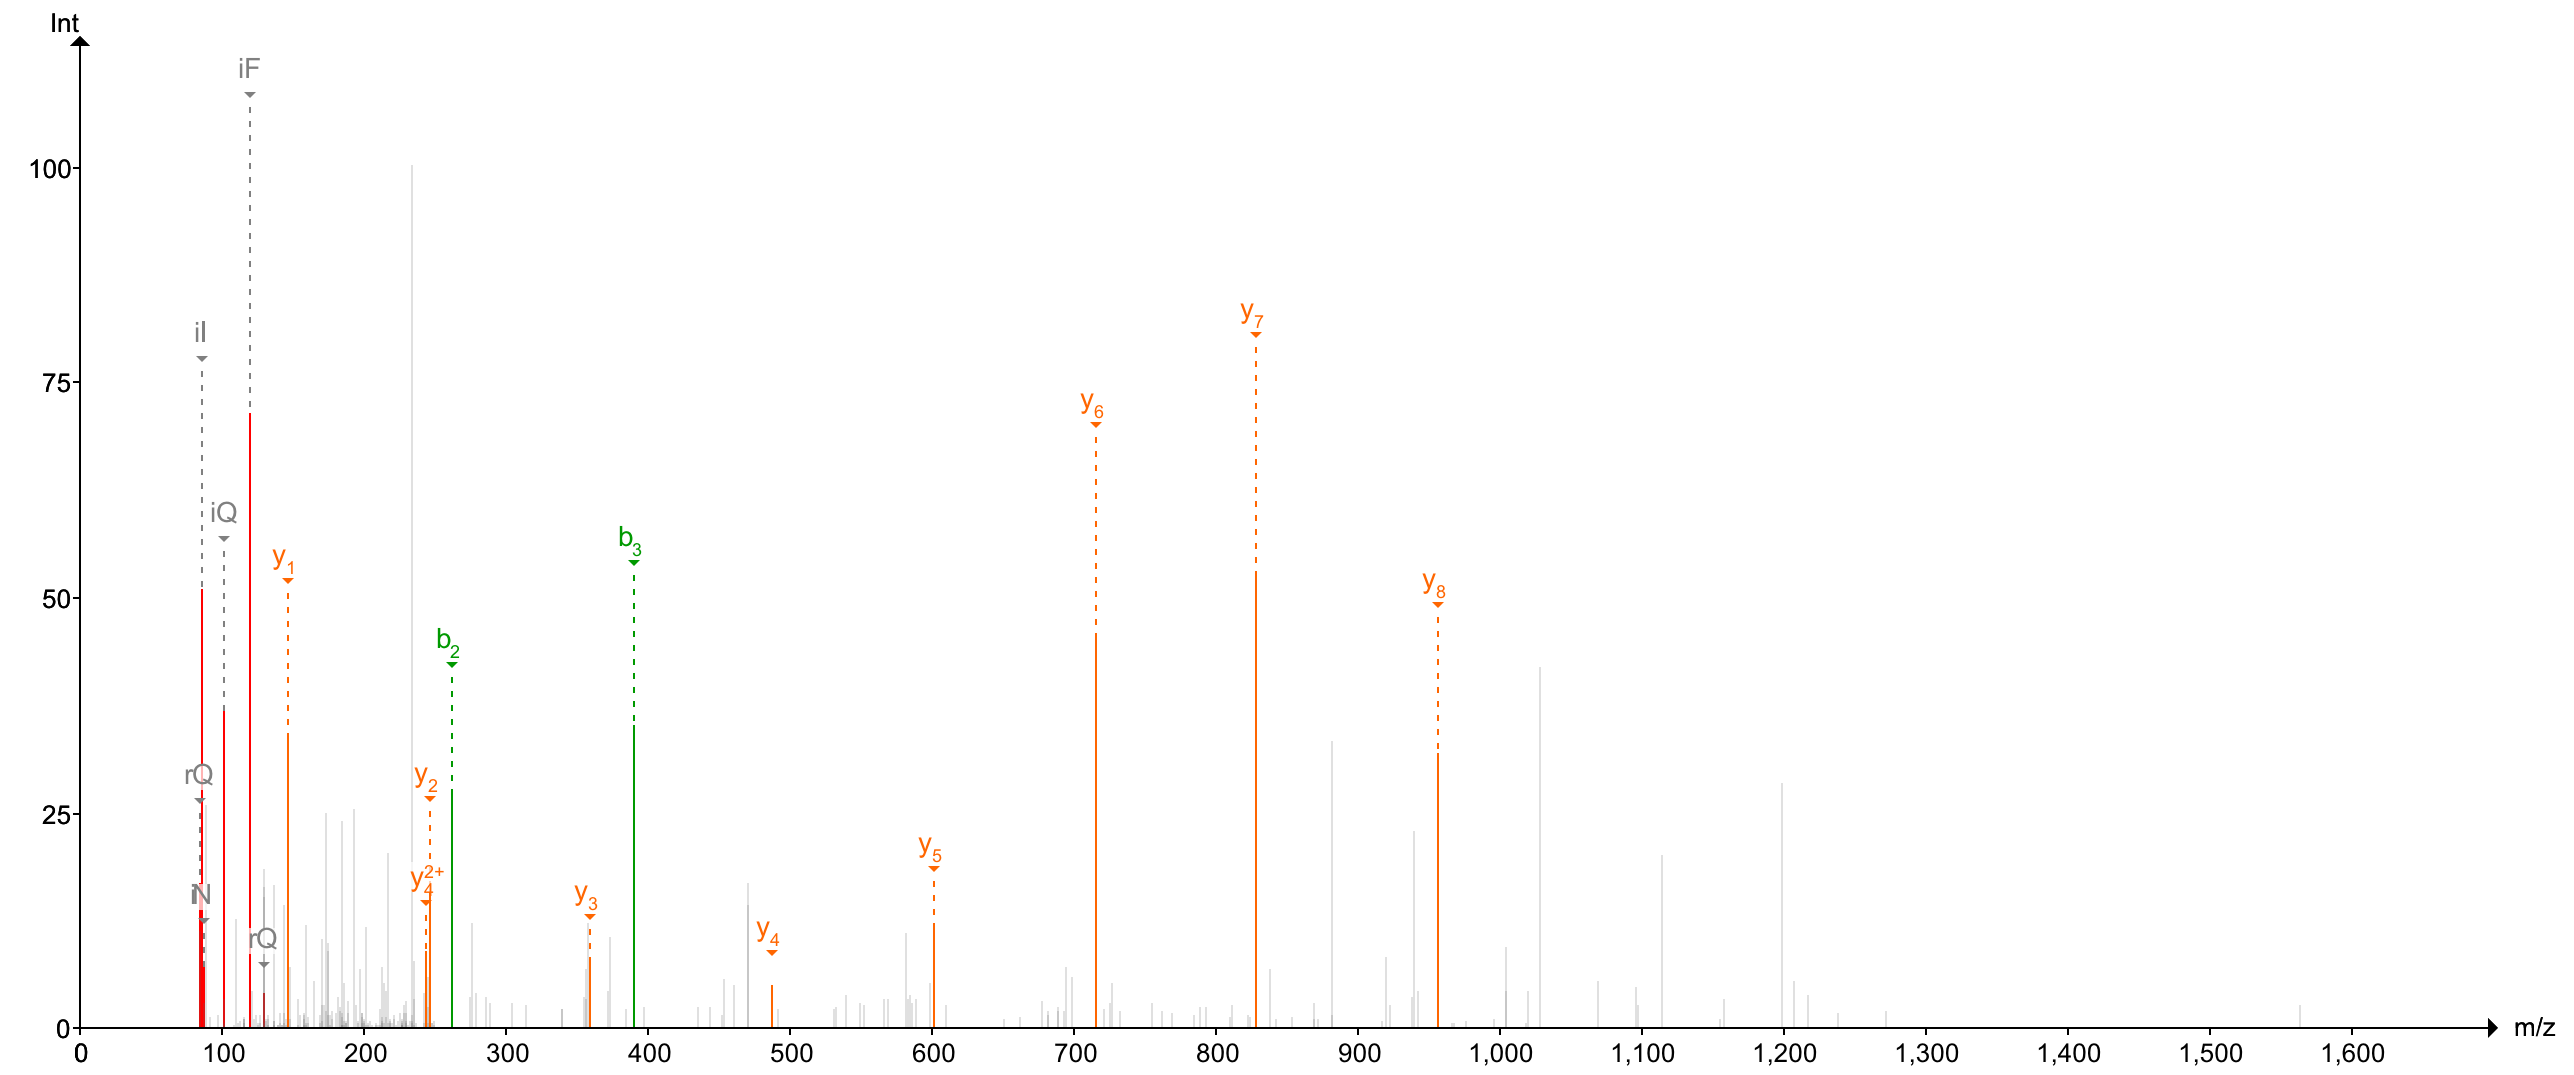

NH<sub>2</sub>-V T P P A V T G S P E F E R-COOH

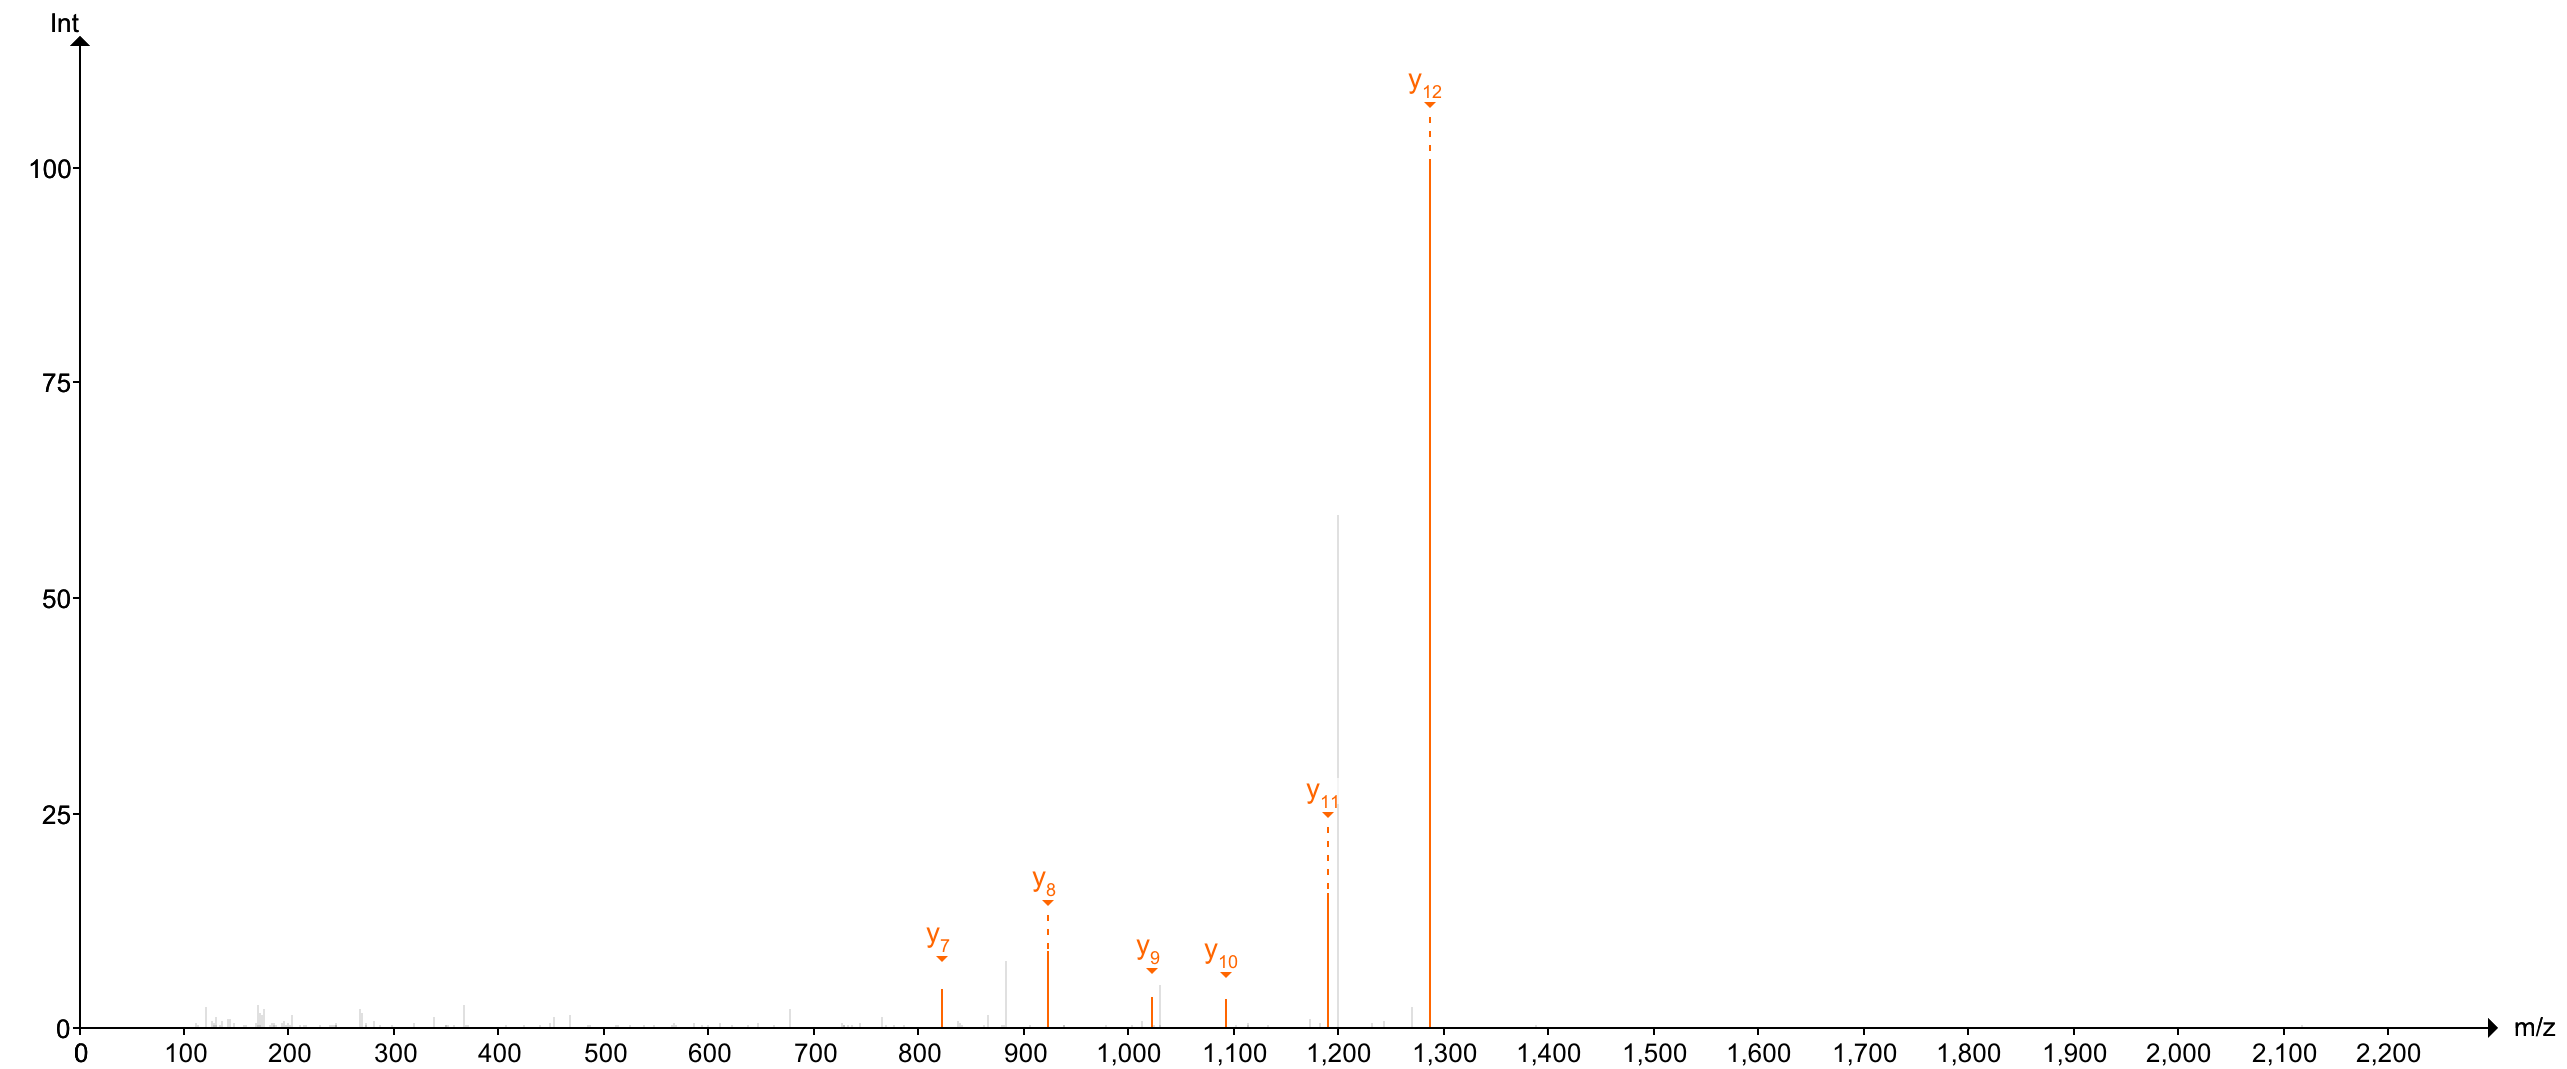

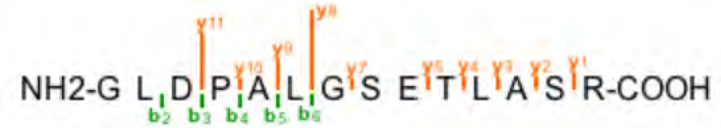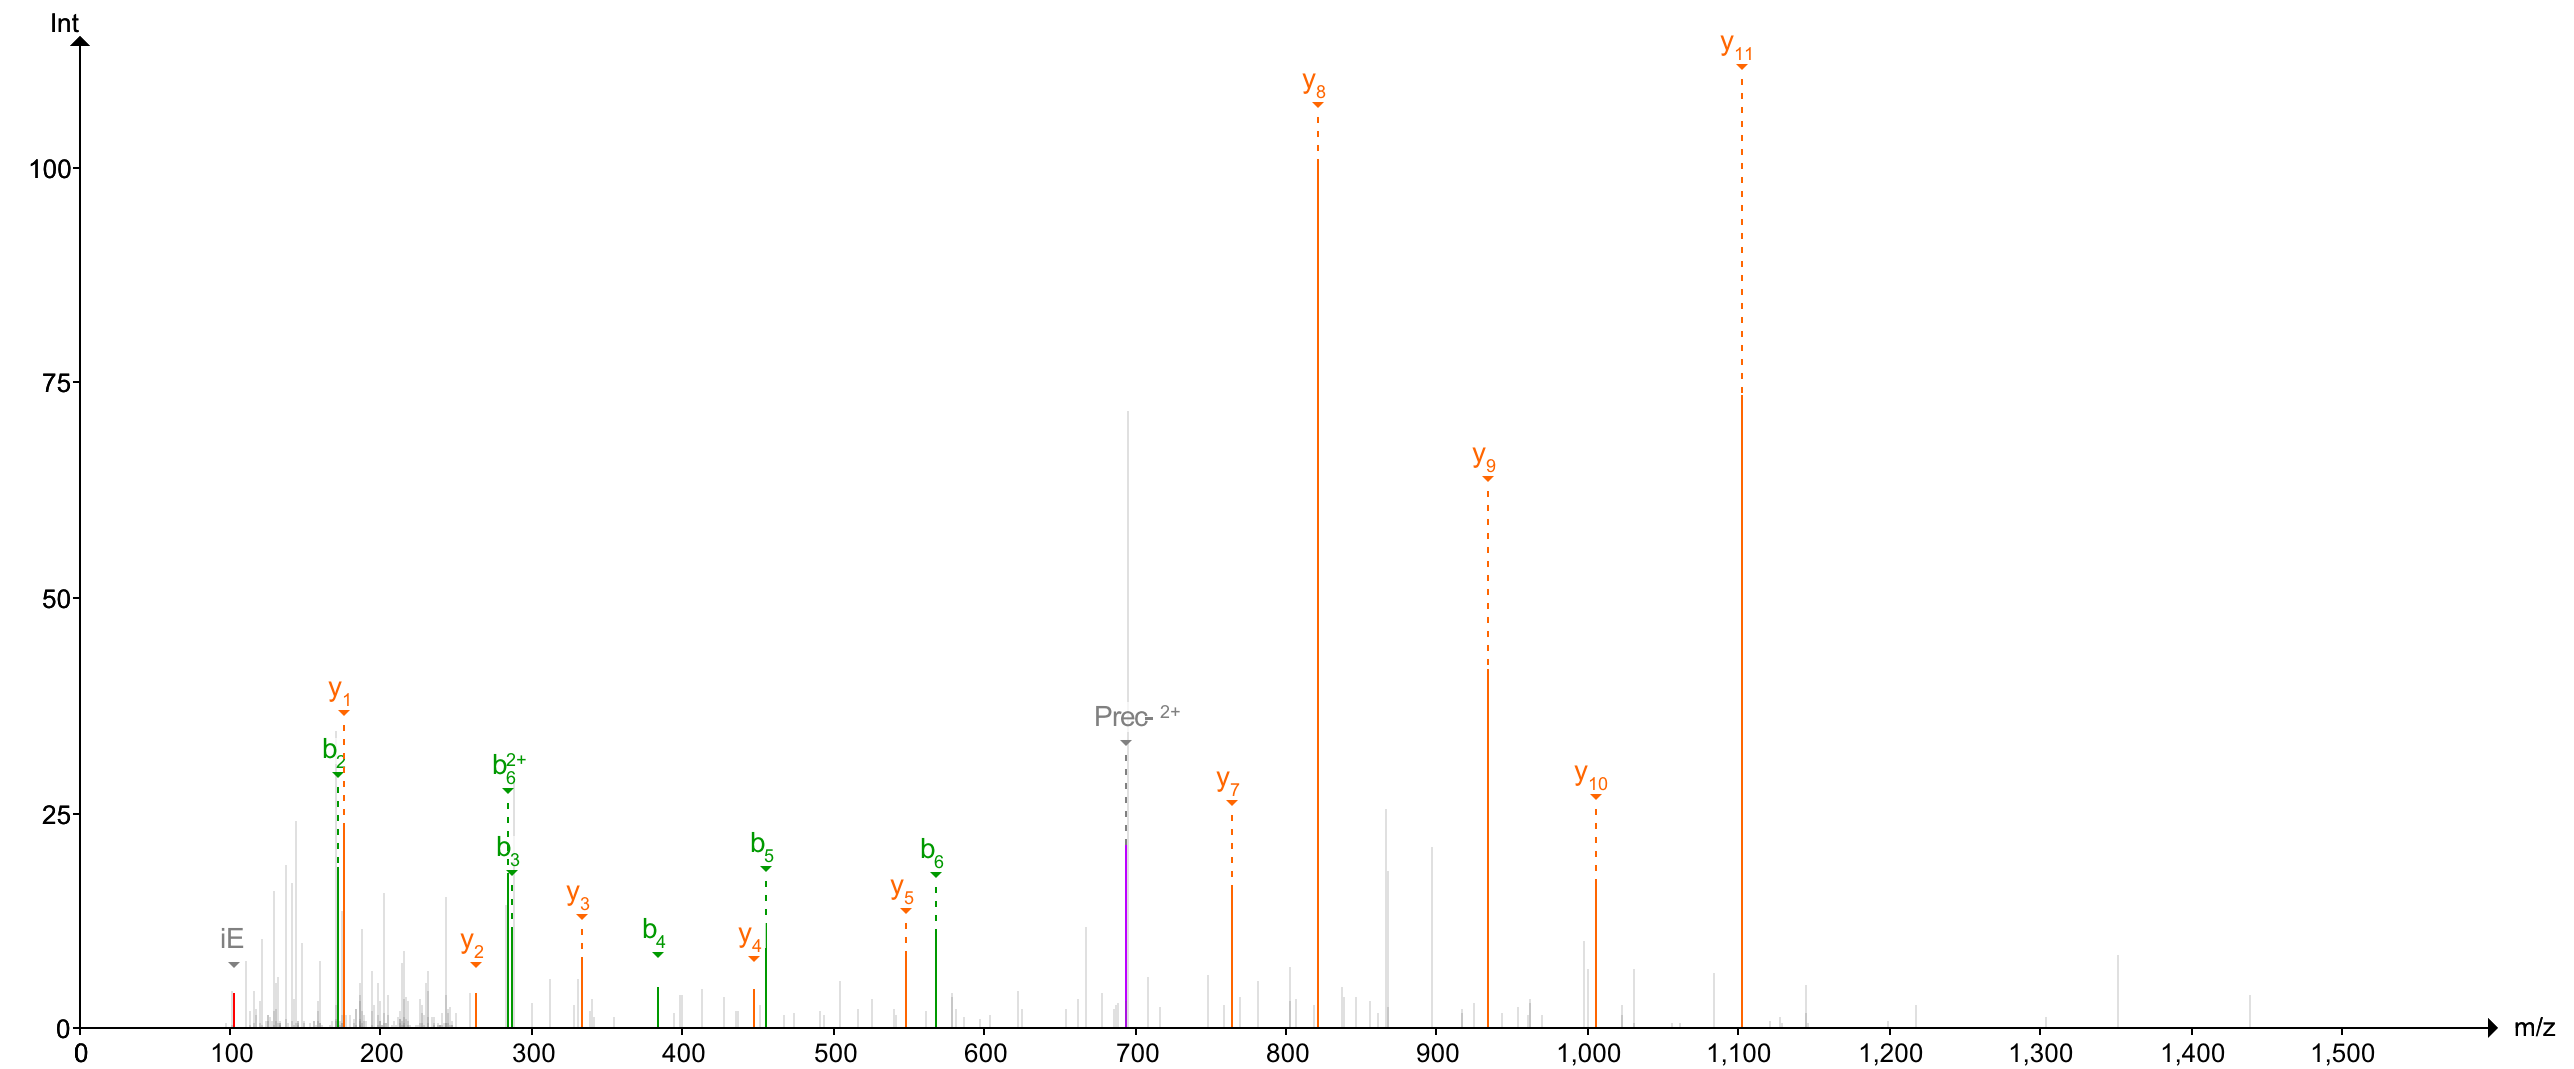

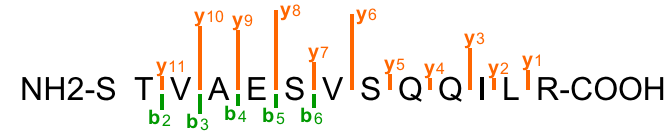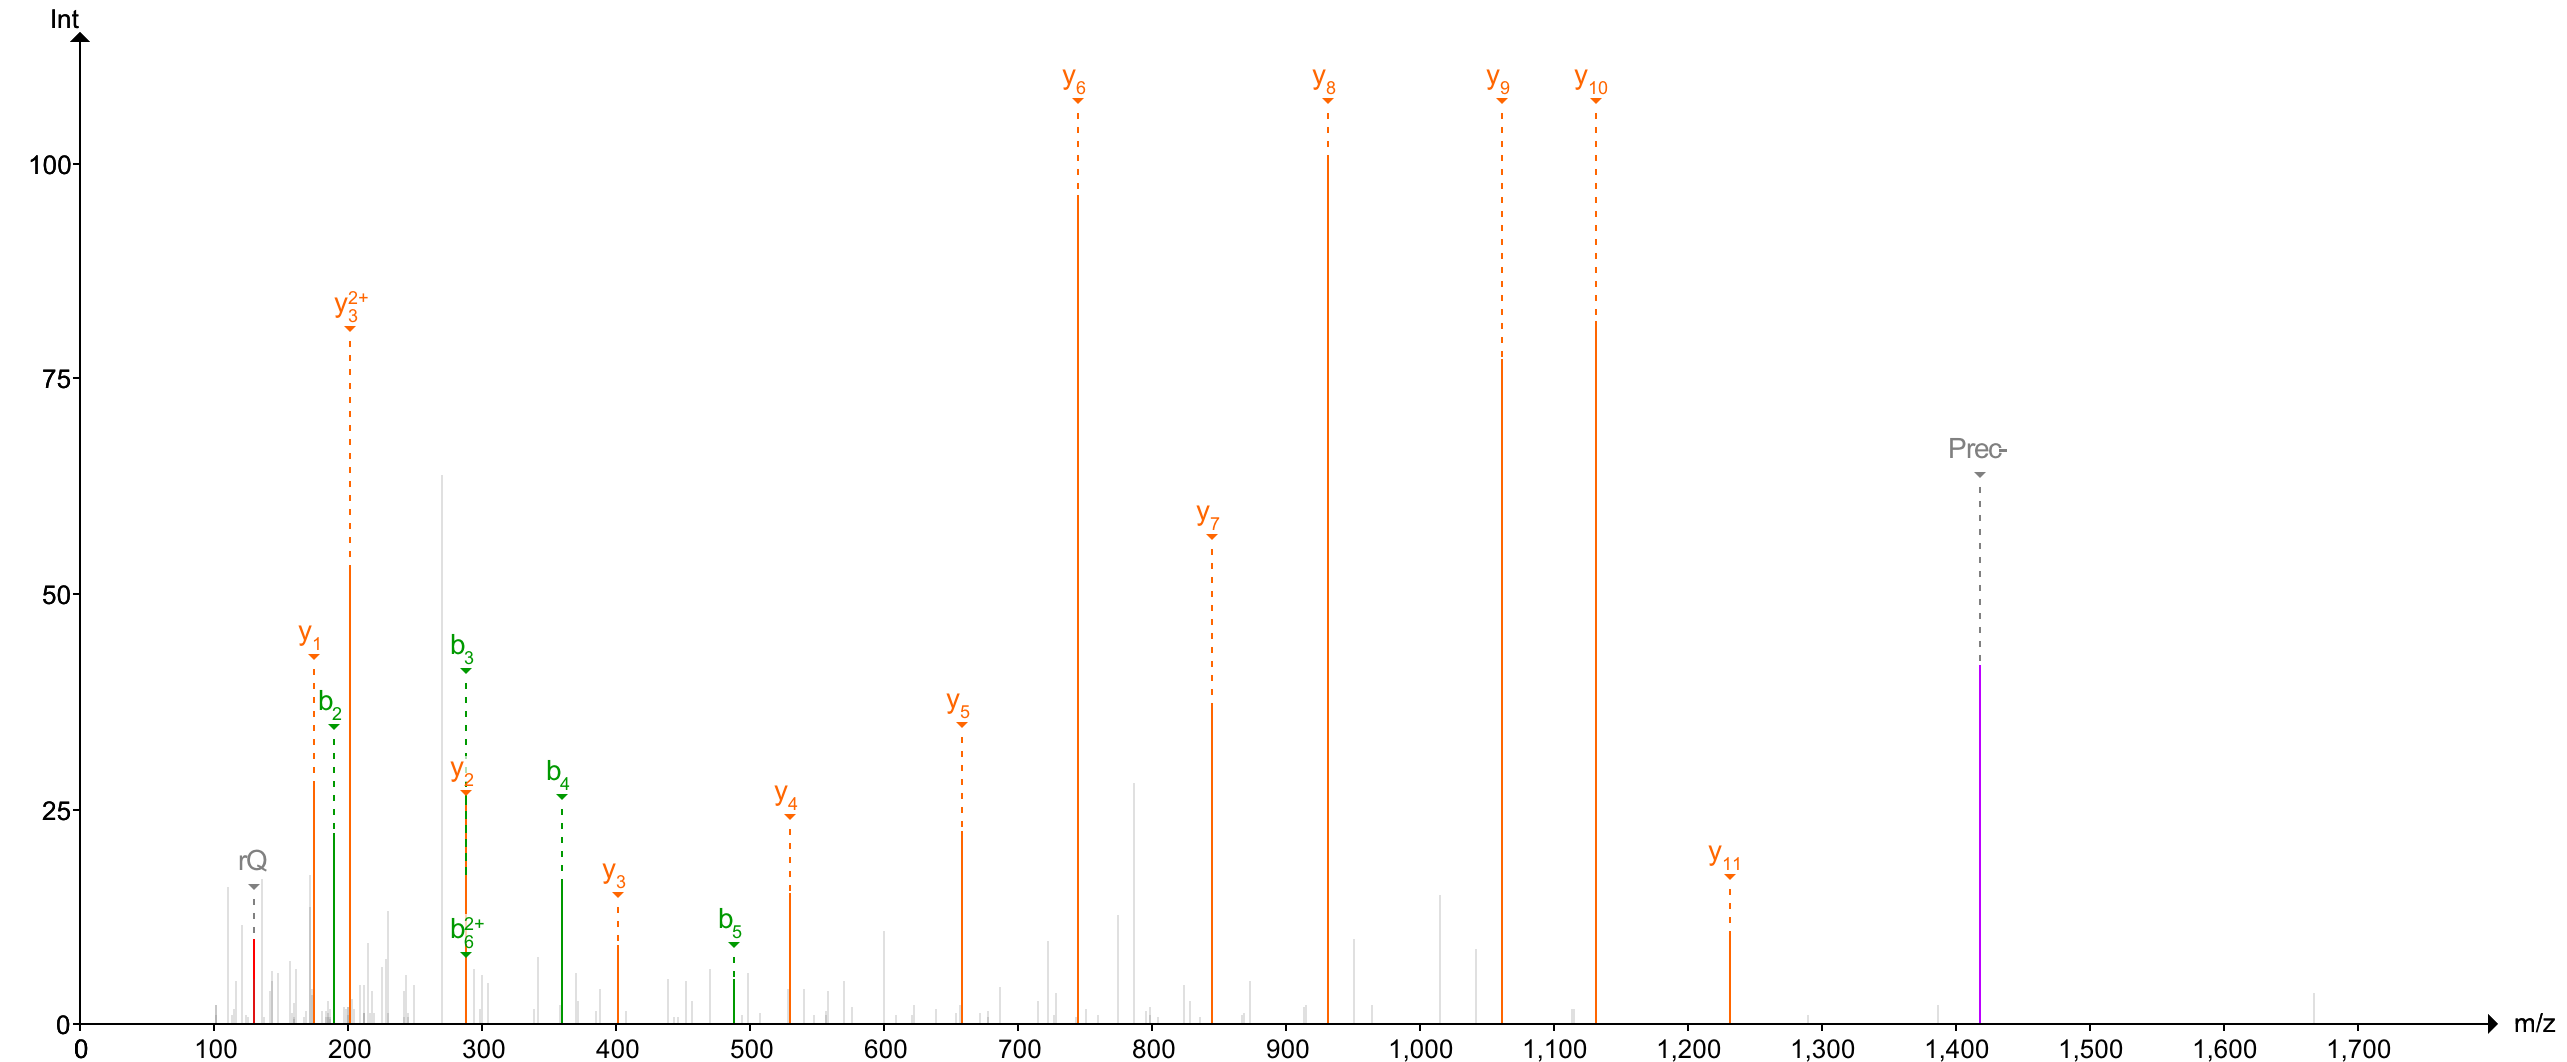



NH<sub>2</sub>-L V L N T A V P D R L P A R-COOH

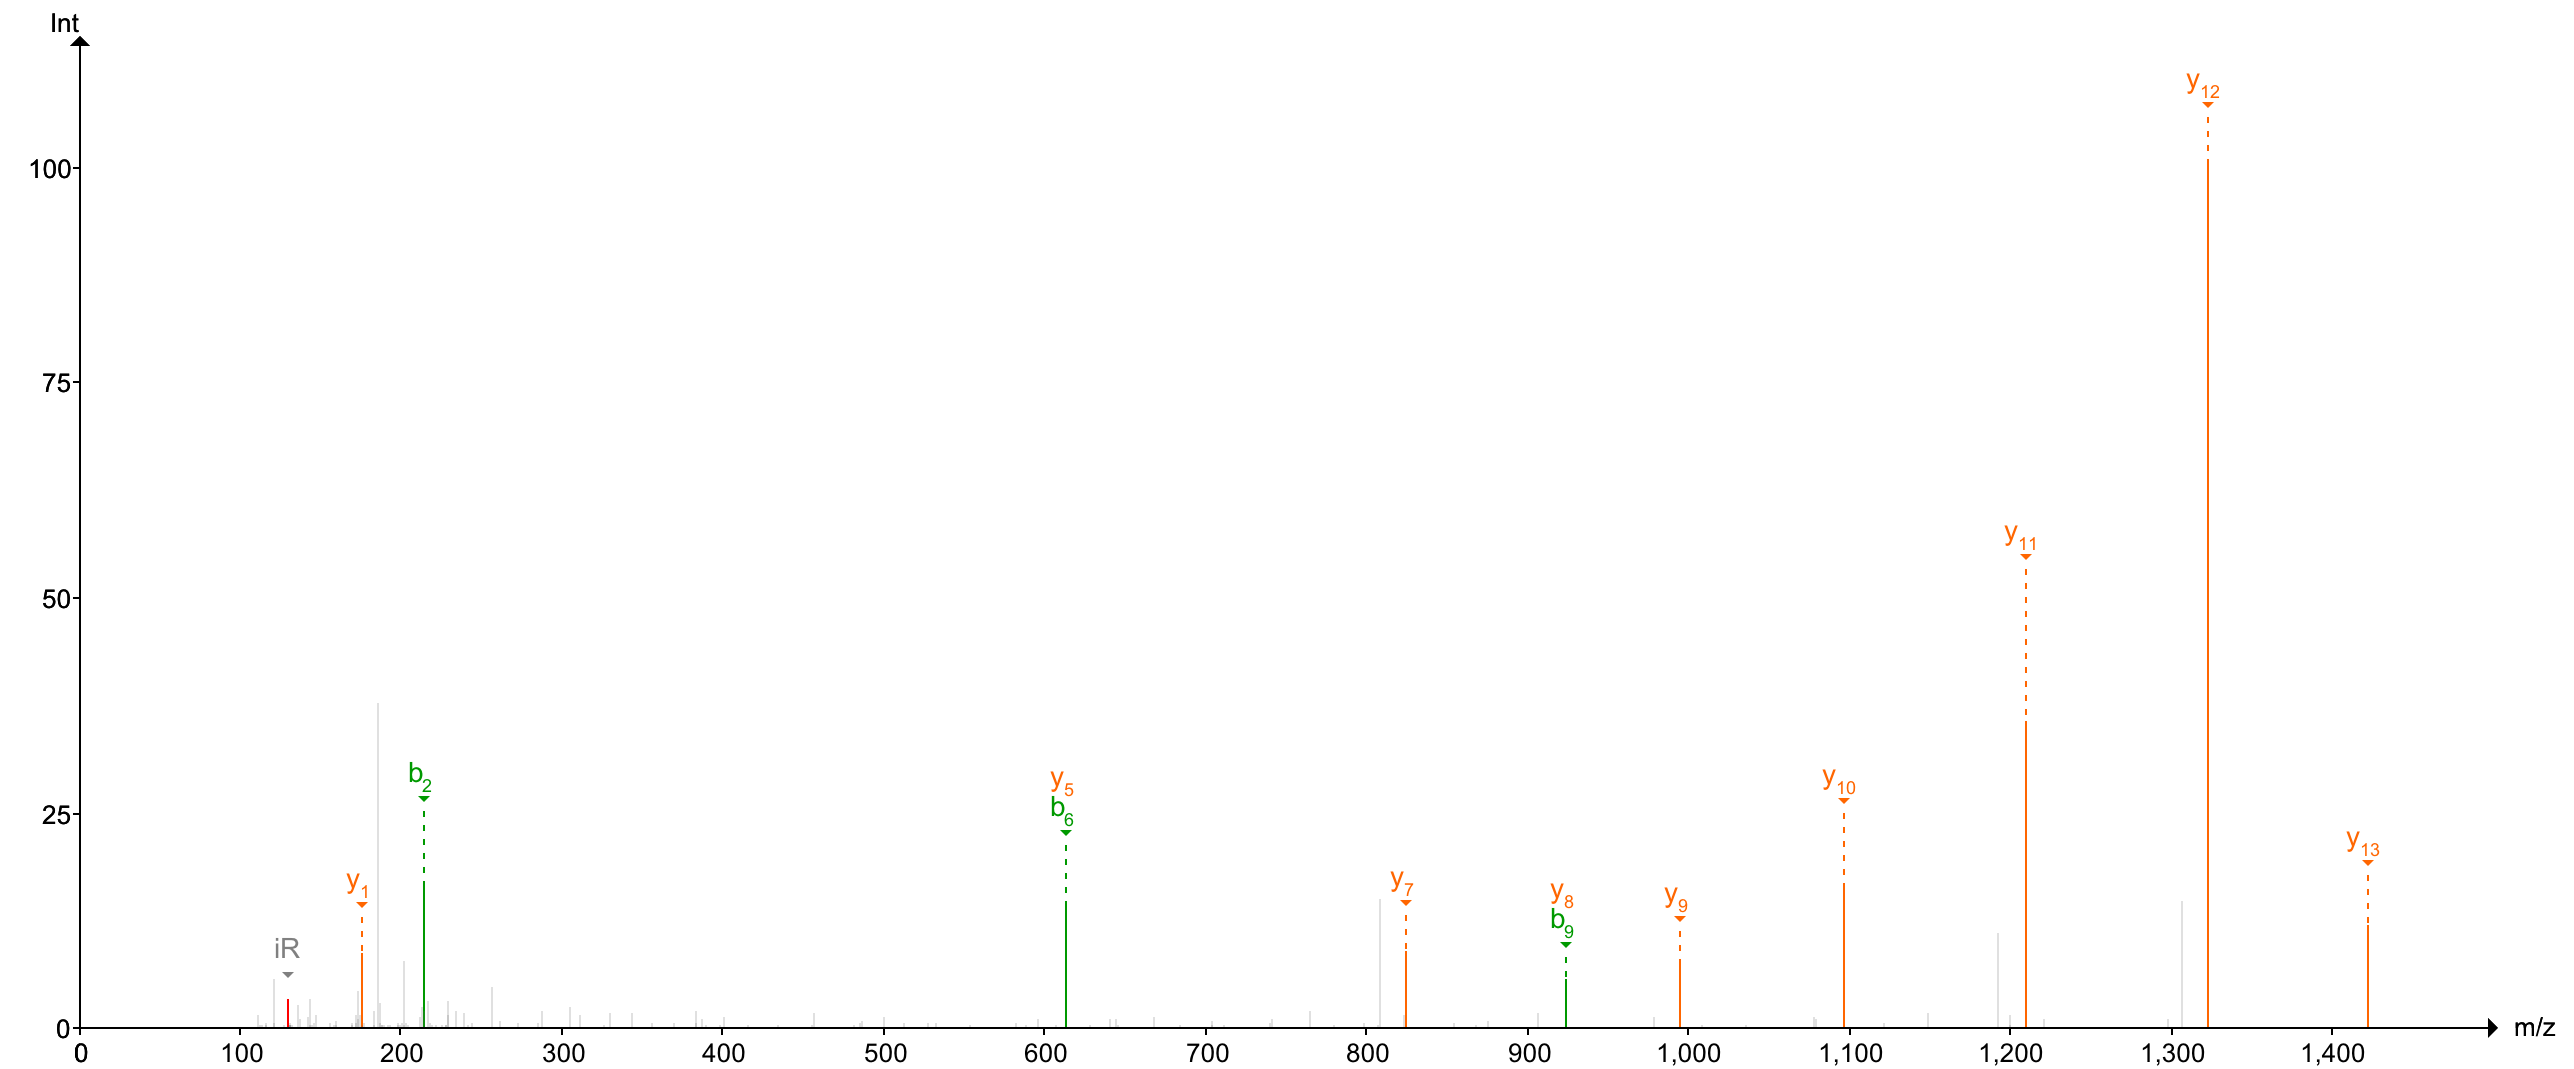

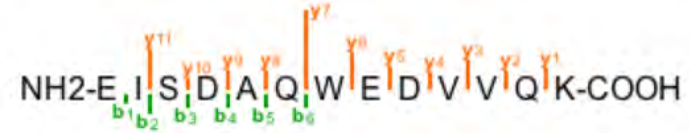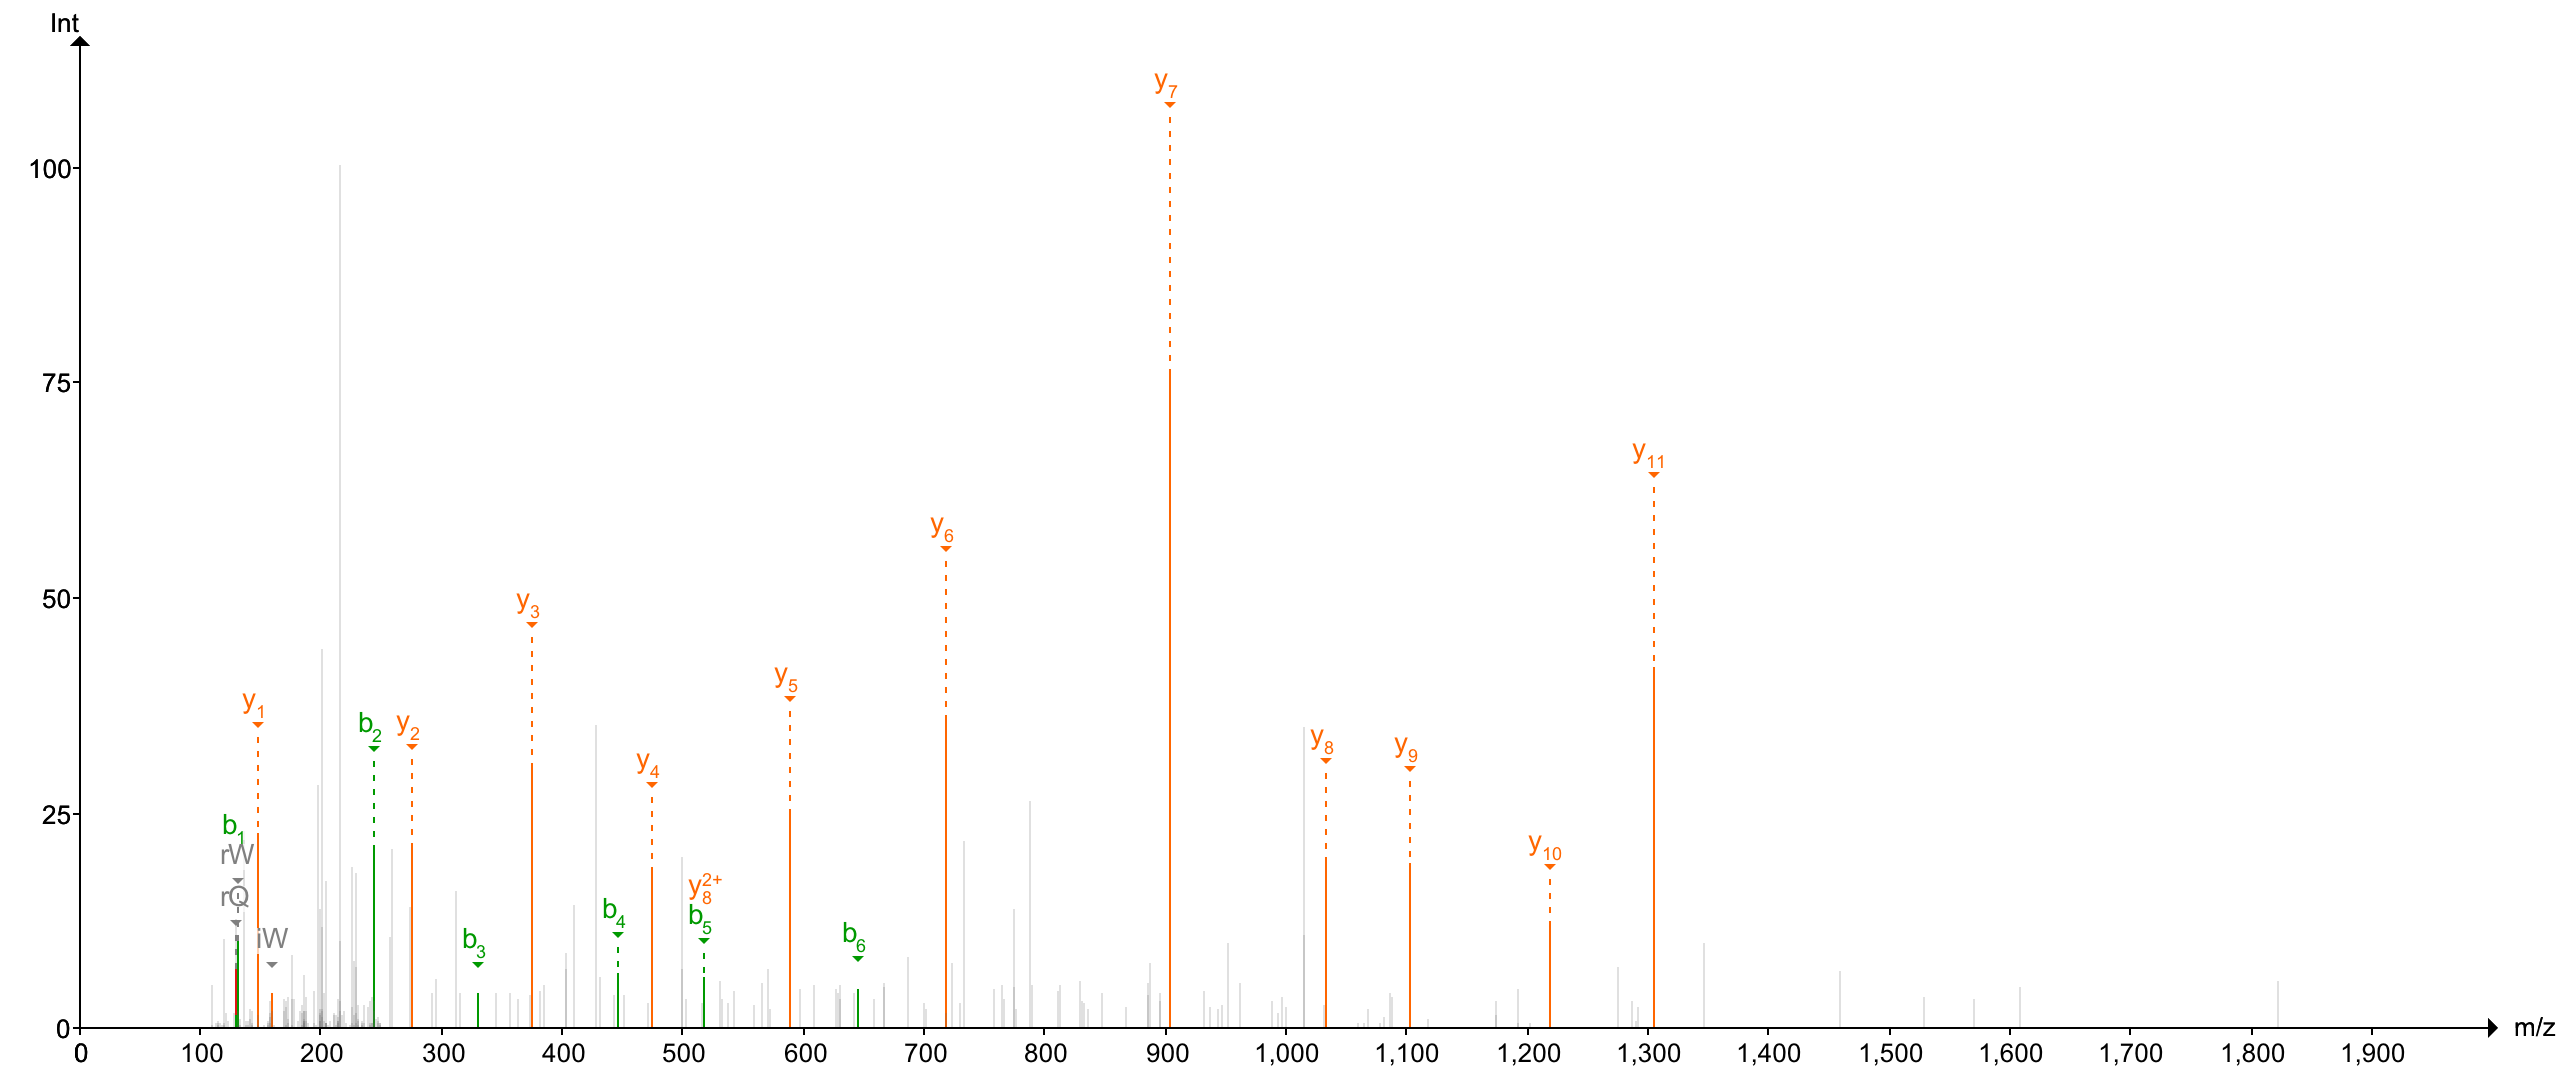

NH<sub>2</sub>-A G<sub>1</sub>D<sub>1</sub>A<sub>1</sub>F<sub>1</sub>G<sub>1</sub>D<sub>1</sub>T<sub>1</sub>S<sub>1</sub>F<sub>1</sub>L<sub>1</sub>N<sub>1</sub>S<sub>1</sub>K-COOH

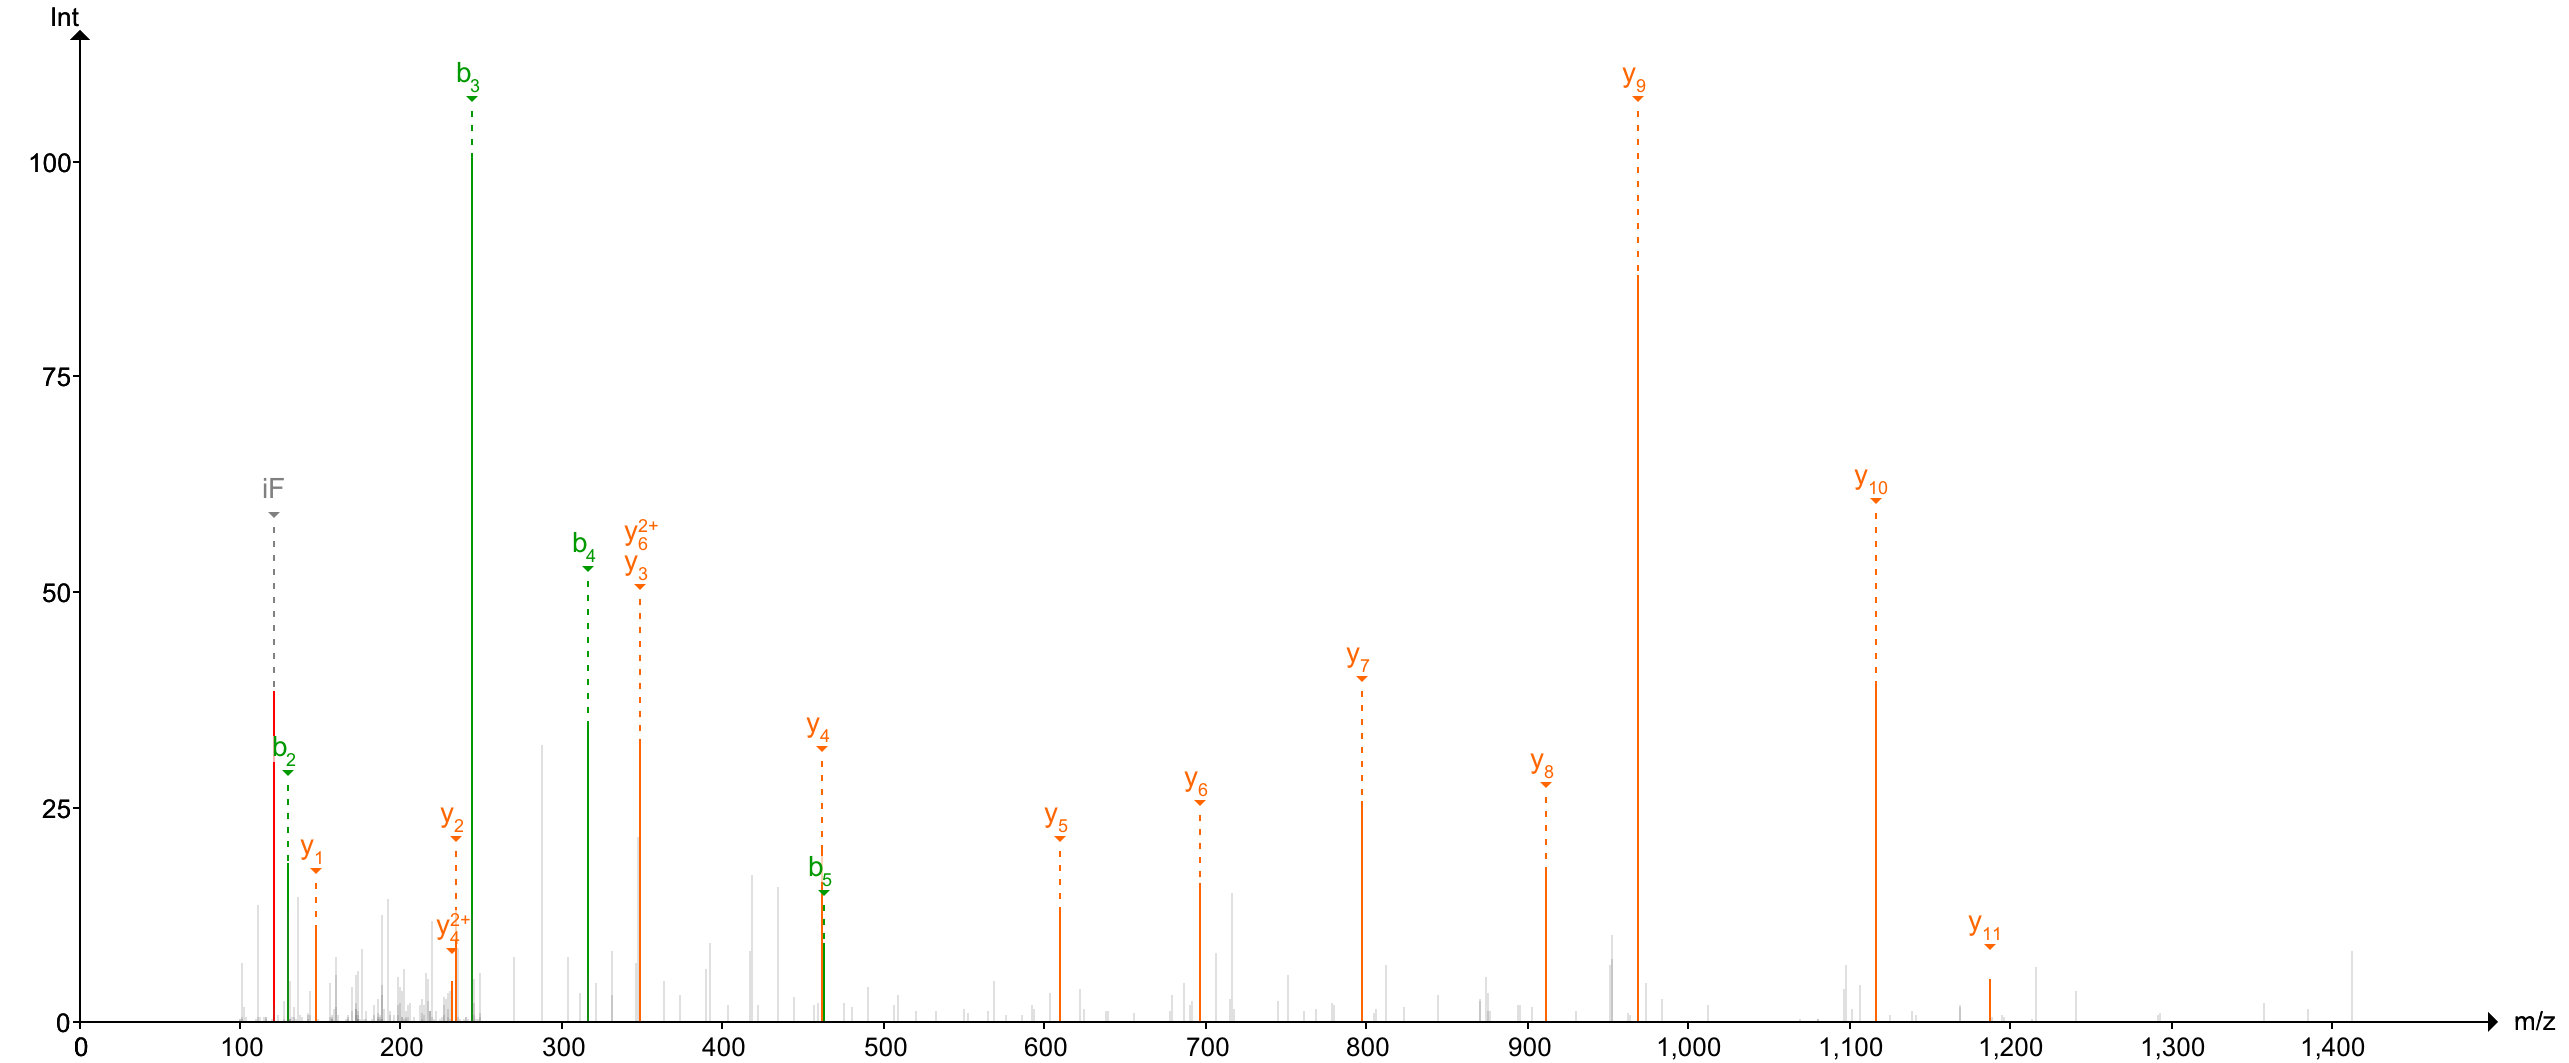

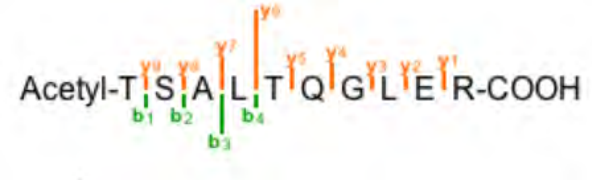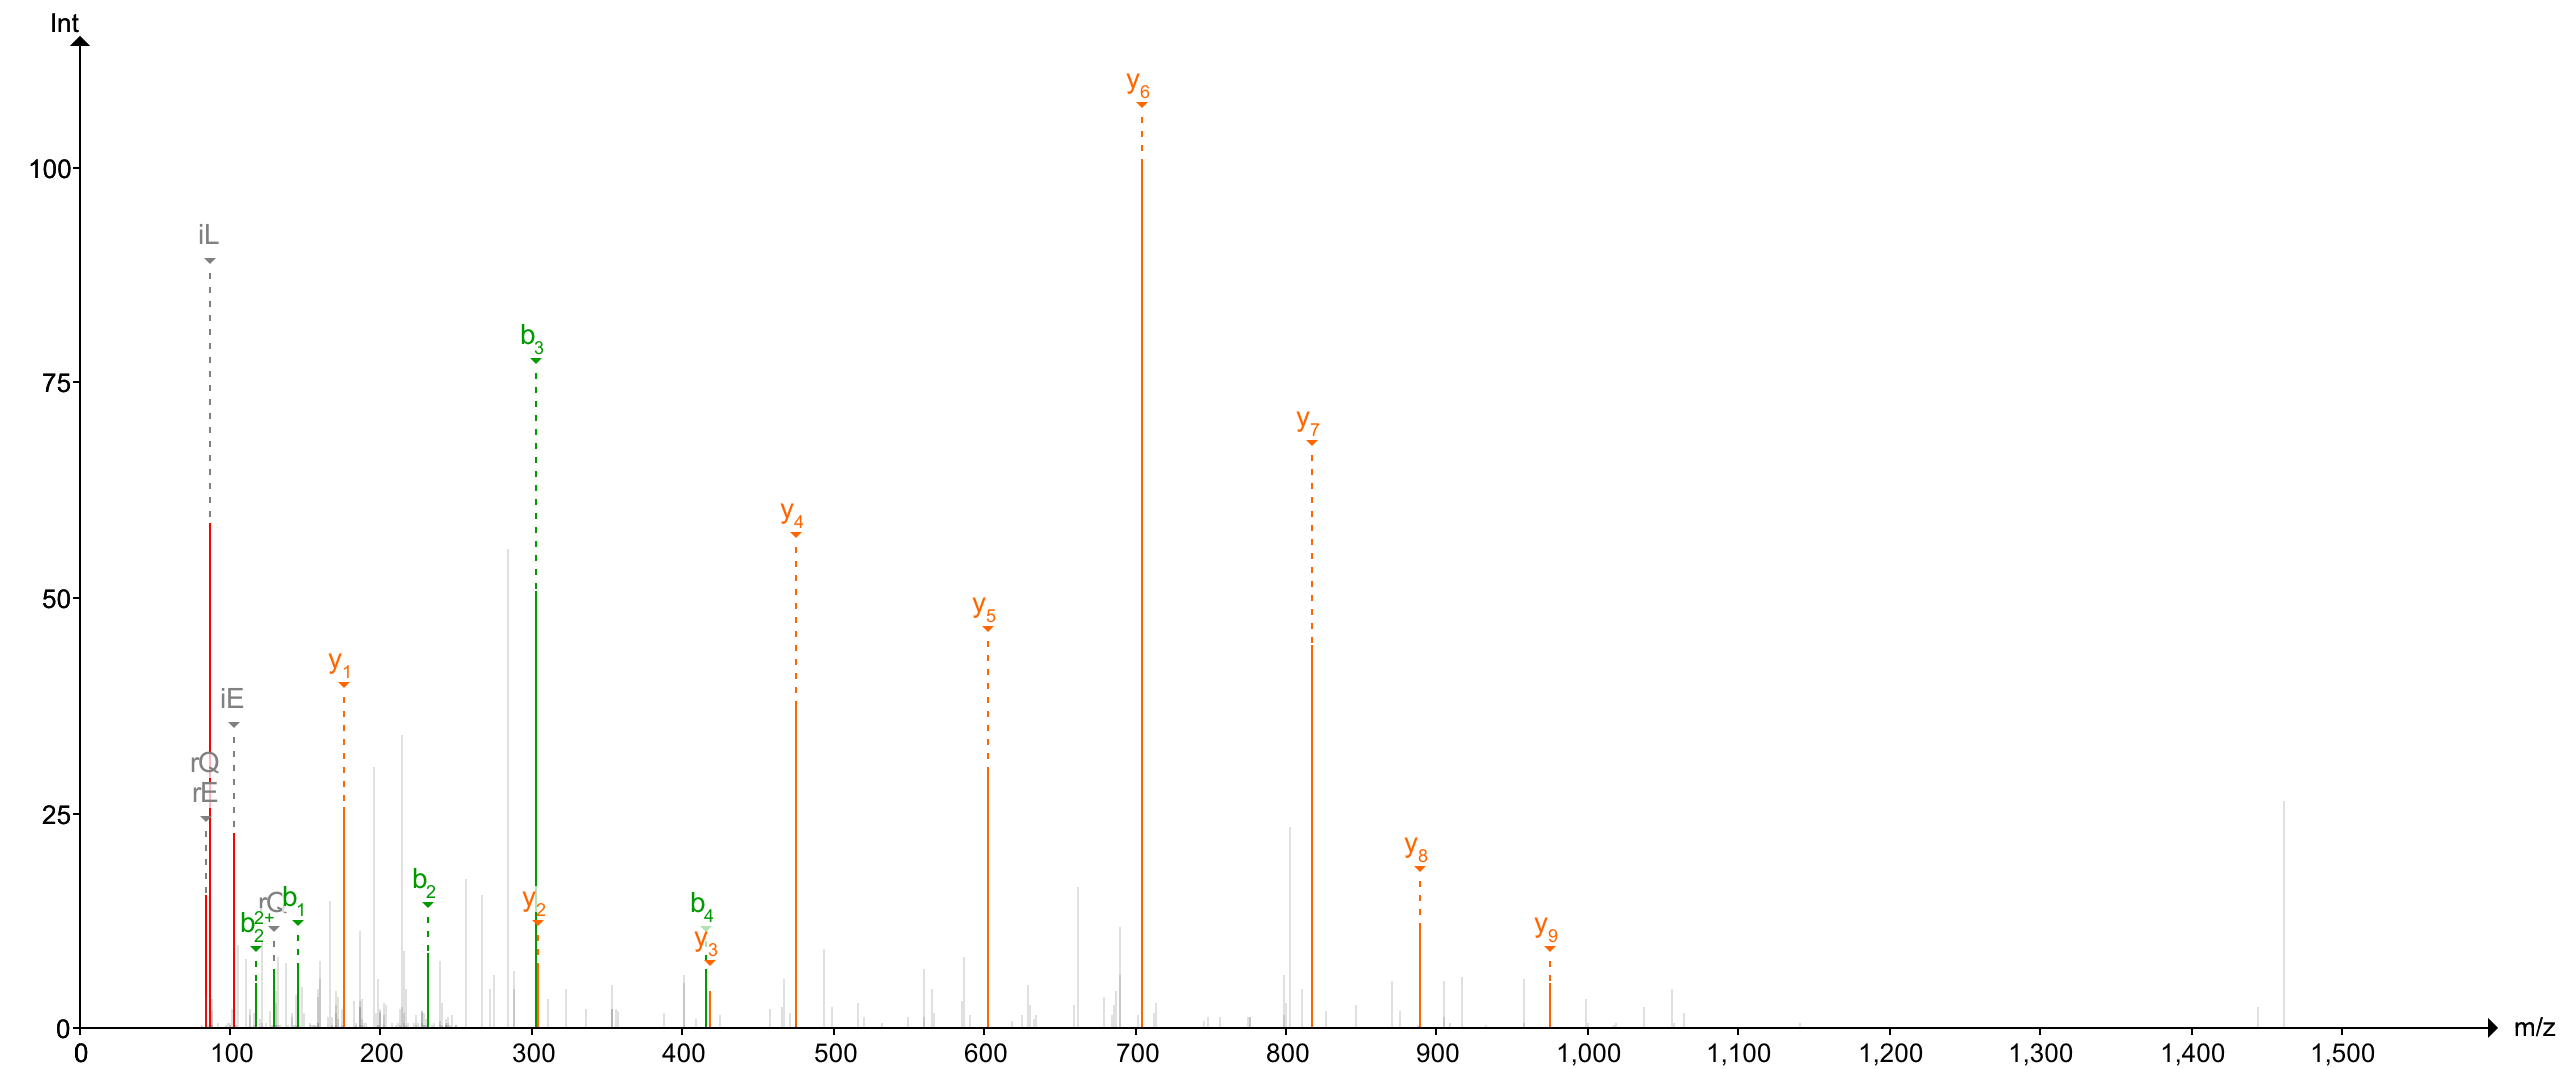

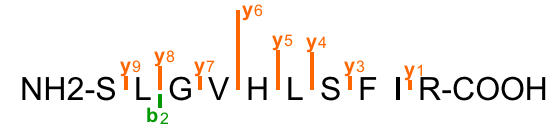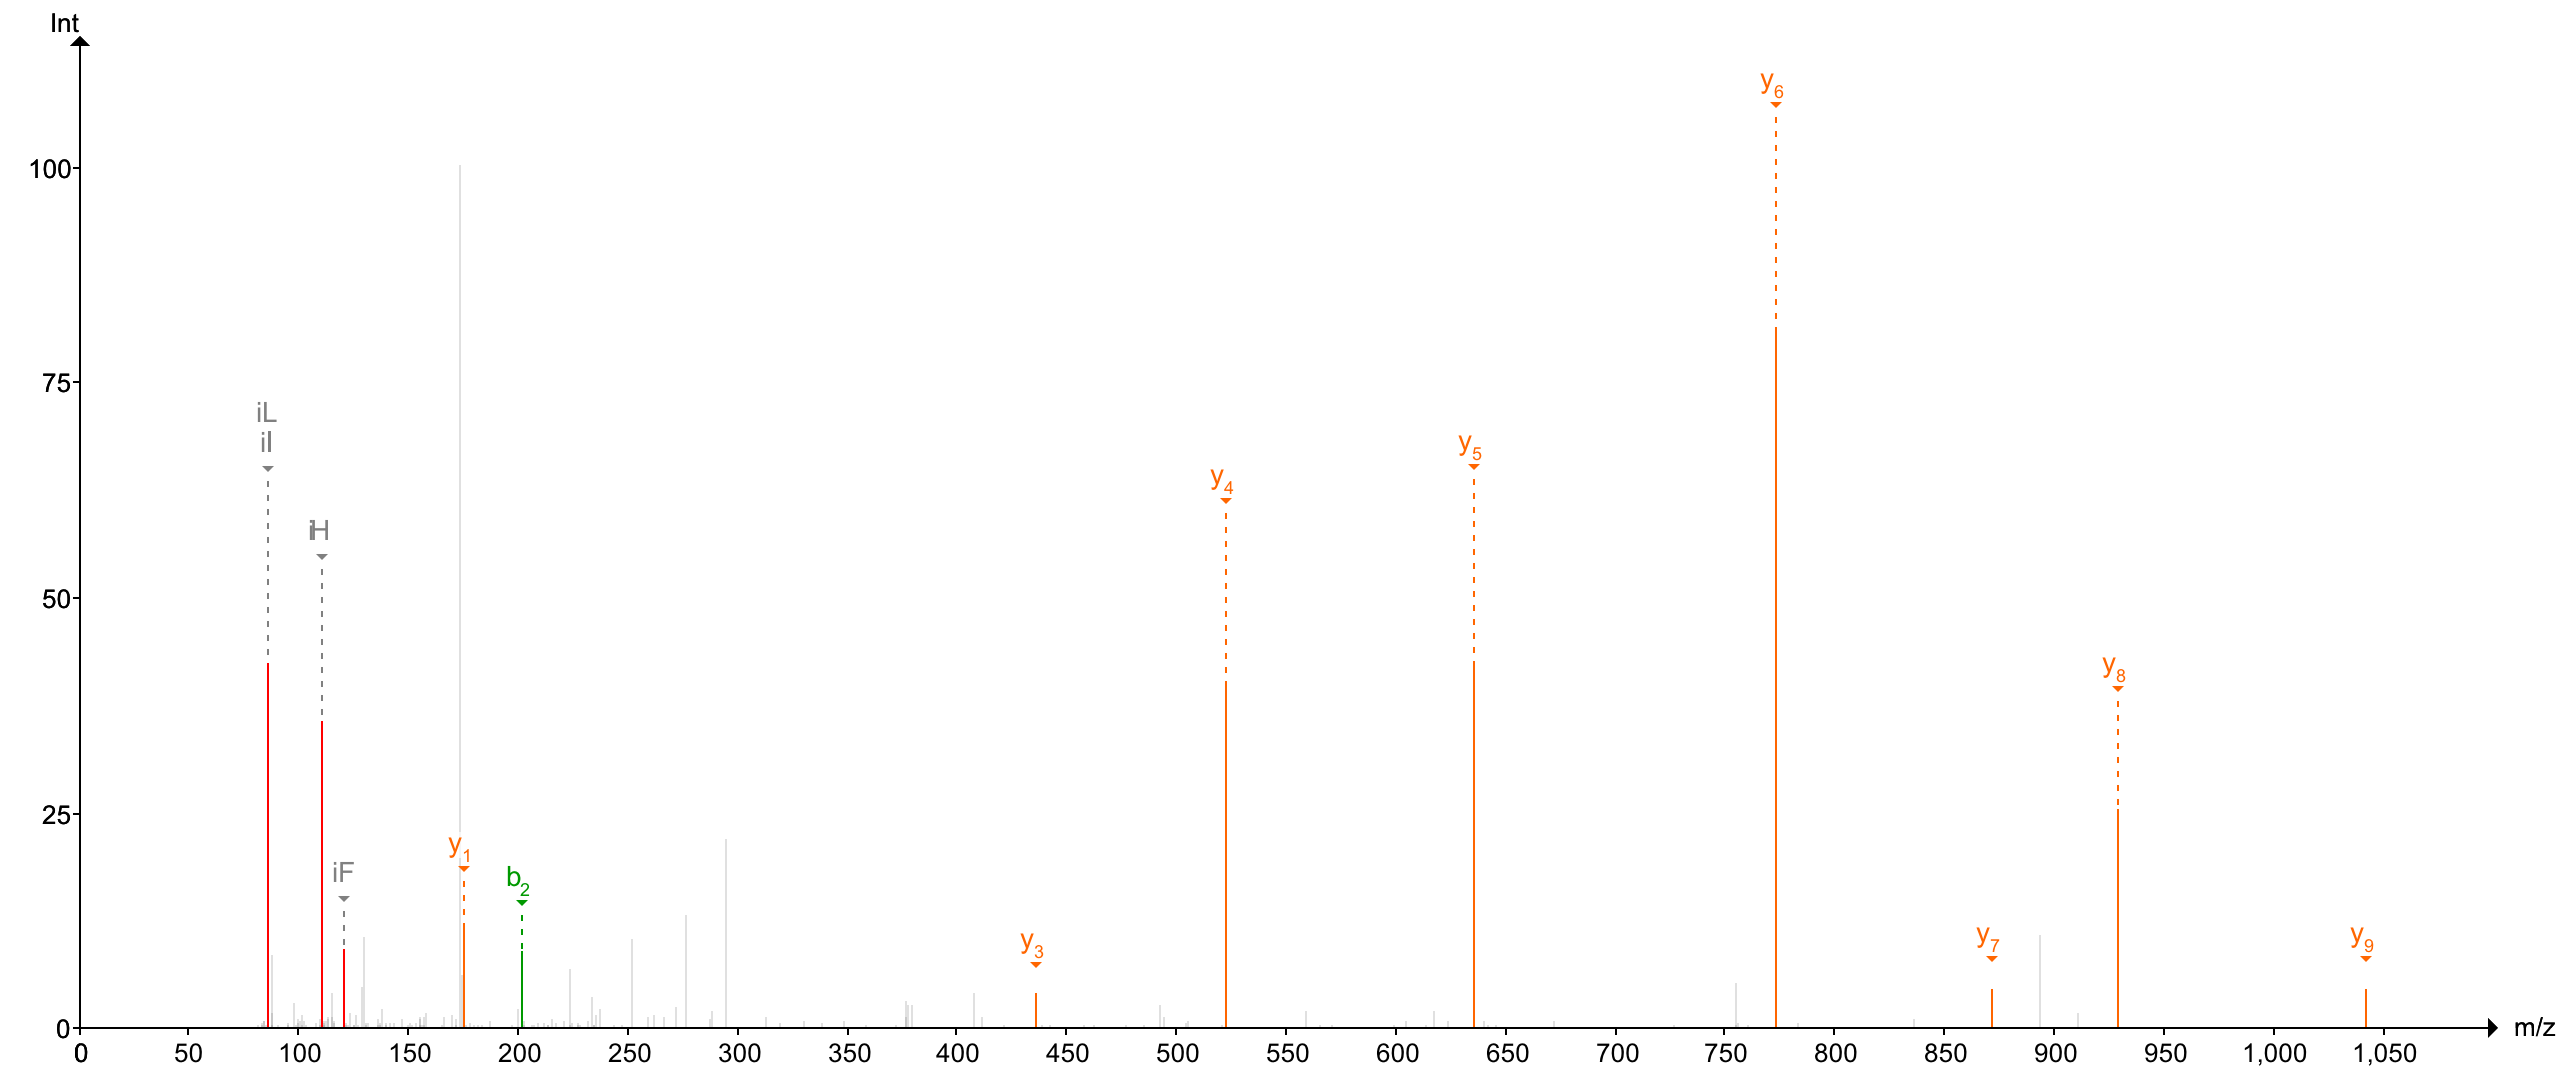

NH<sub>2</sub>-L I I G T N I I I Y P V N S K-COOH  
 b<sub>2</sub> b<sub>3</sub> b<sub>5</sub> b<sub>6</sub> b<sub>7</sub> y<sub>1</sub> y<sub>2</sub> y<sub>3</sub> y<sub>4</sub> y<sub>5</sub> y<sub>6</sub> y<sub>7</sub> y<sub>8</sub> y<sub>9</sub> y<sub>10</sub> y<sub>11</sub> y<sub>12</sub>

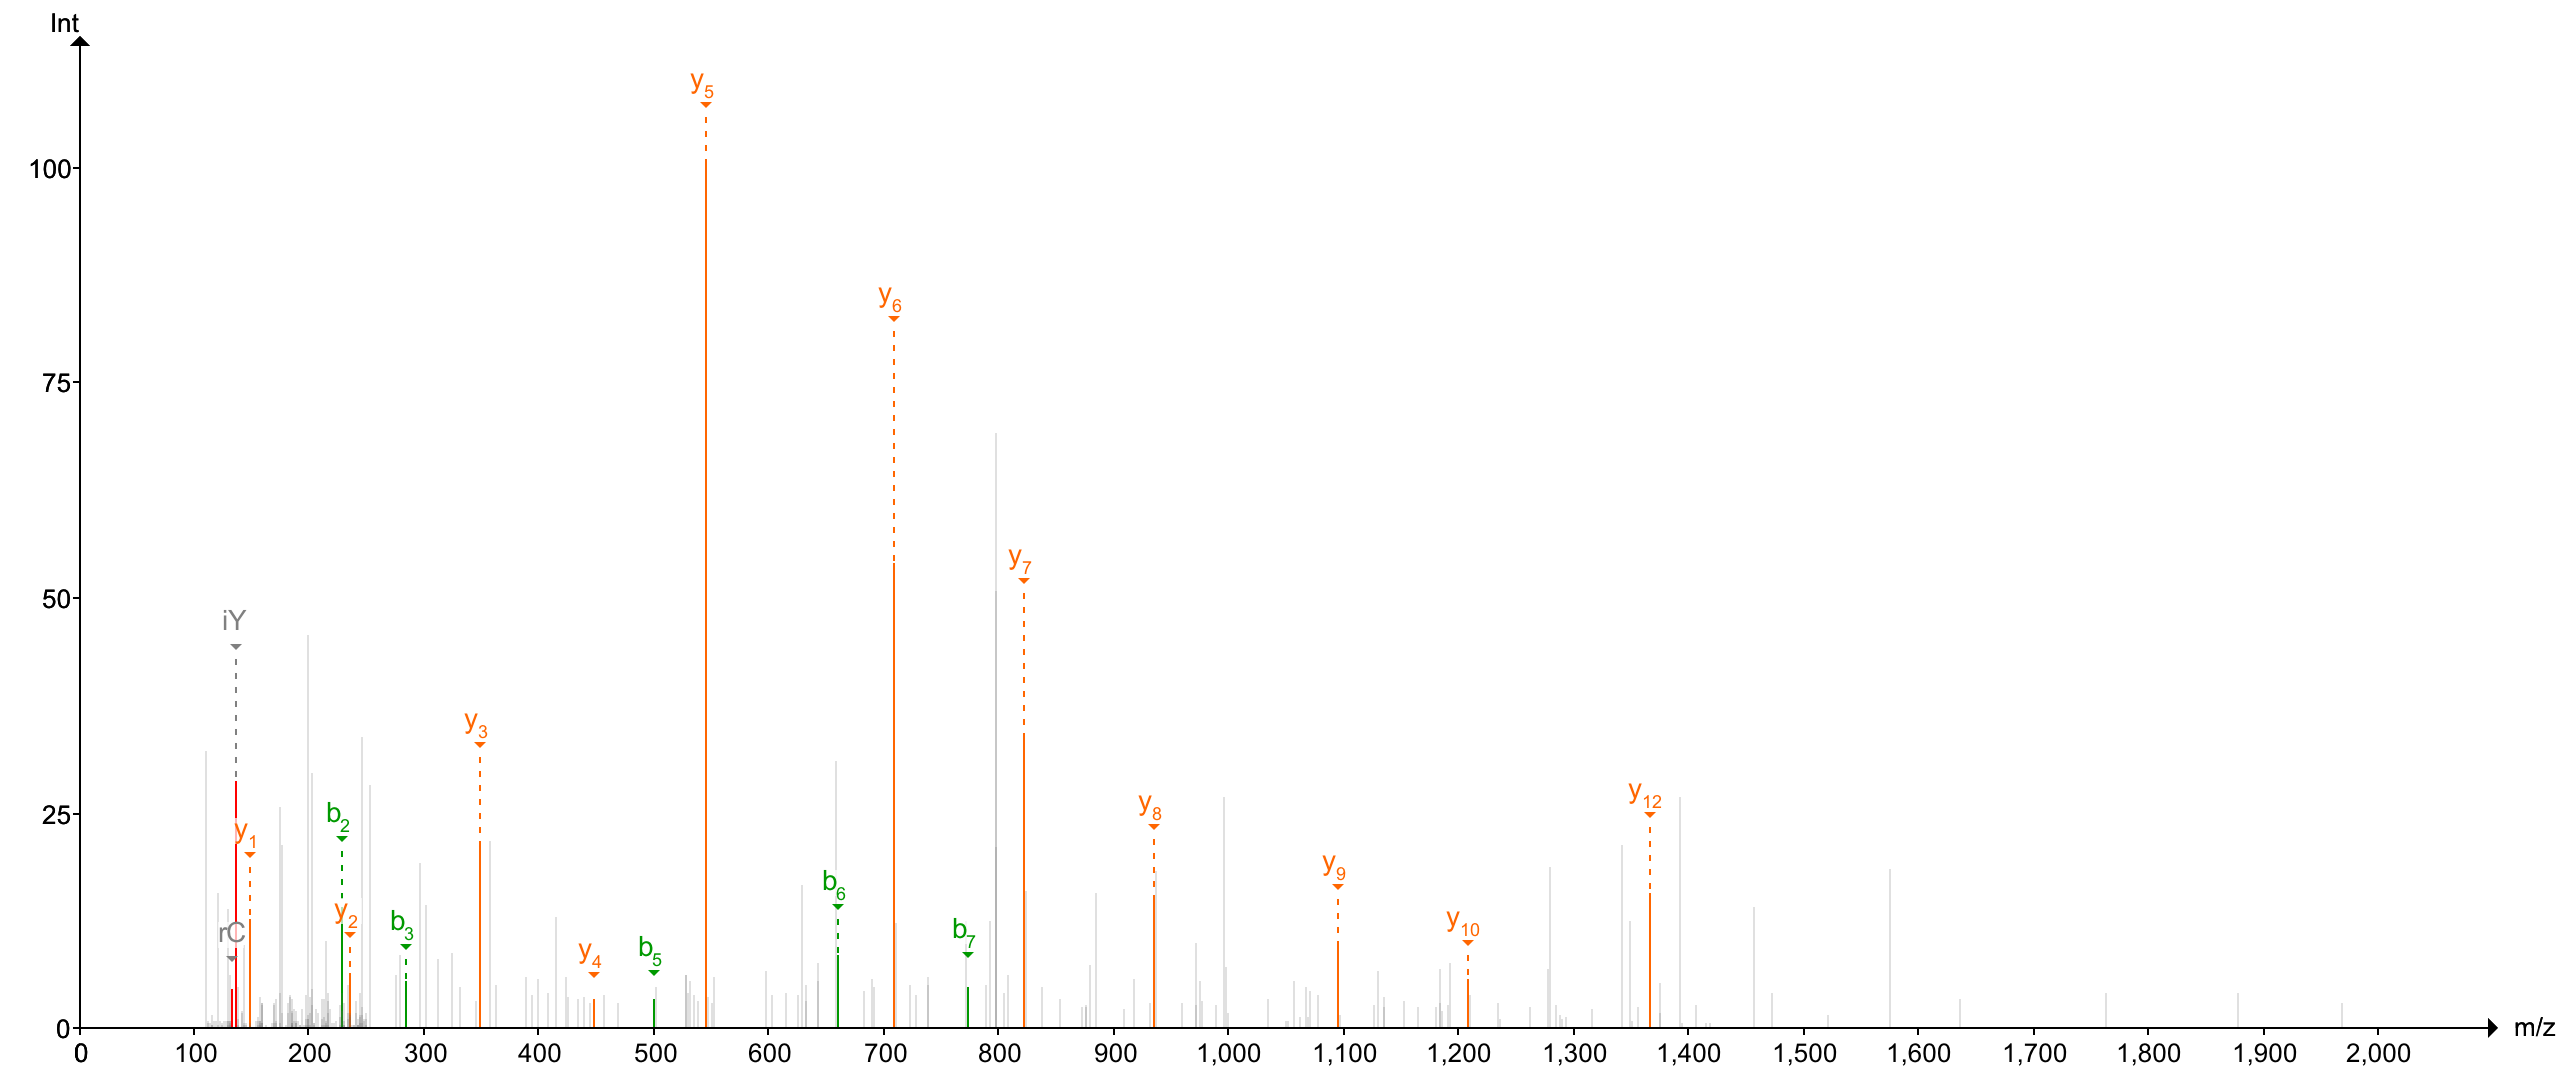

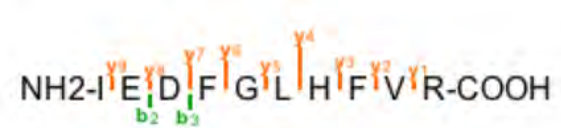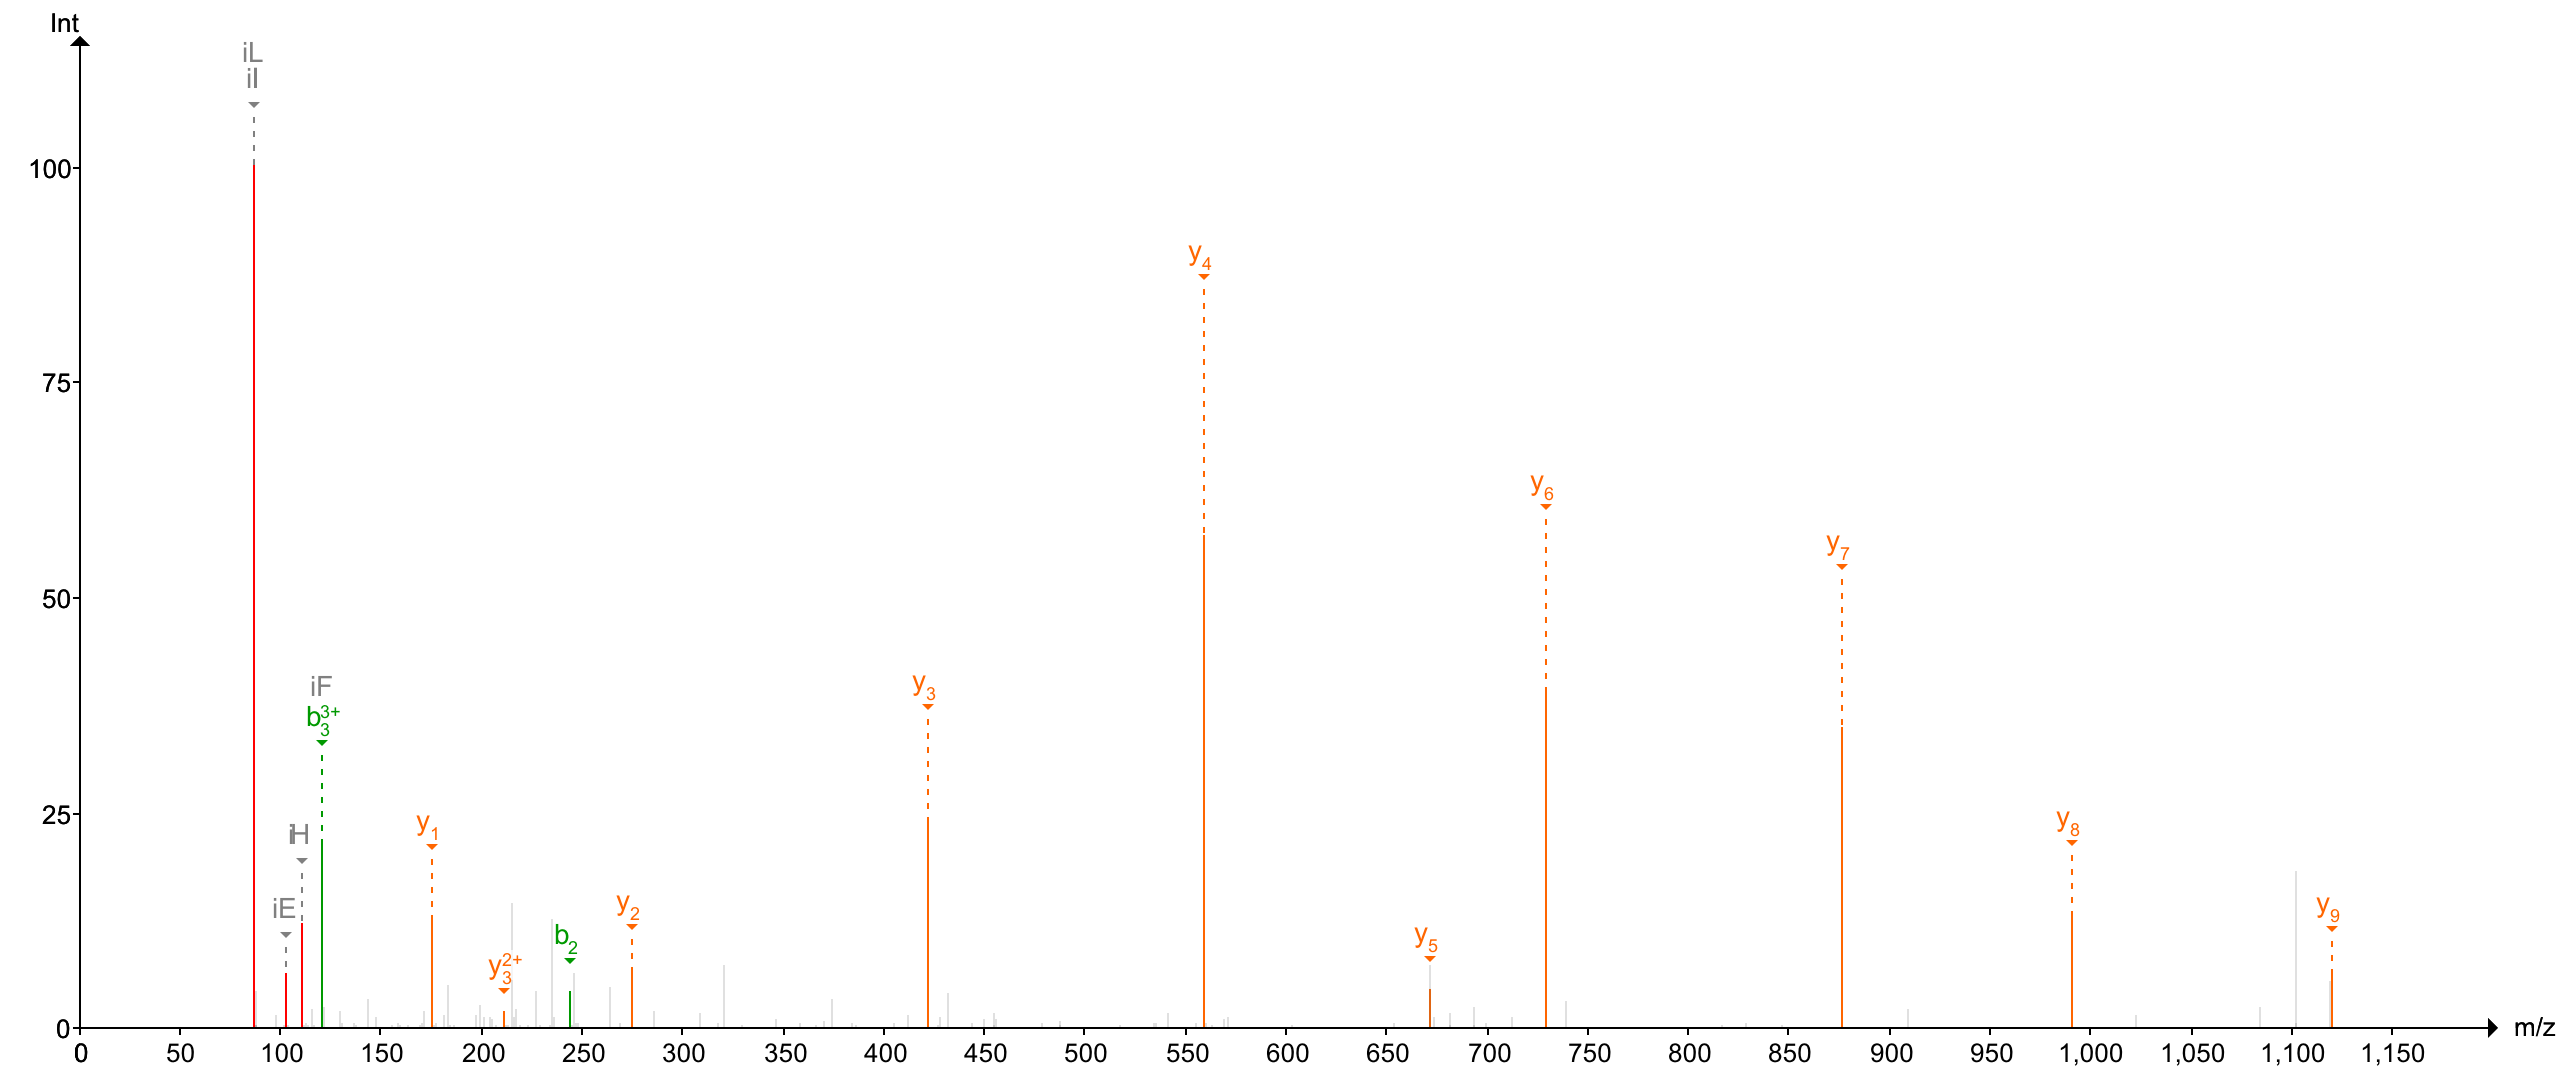

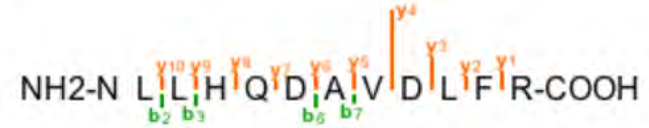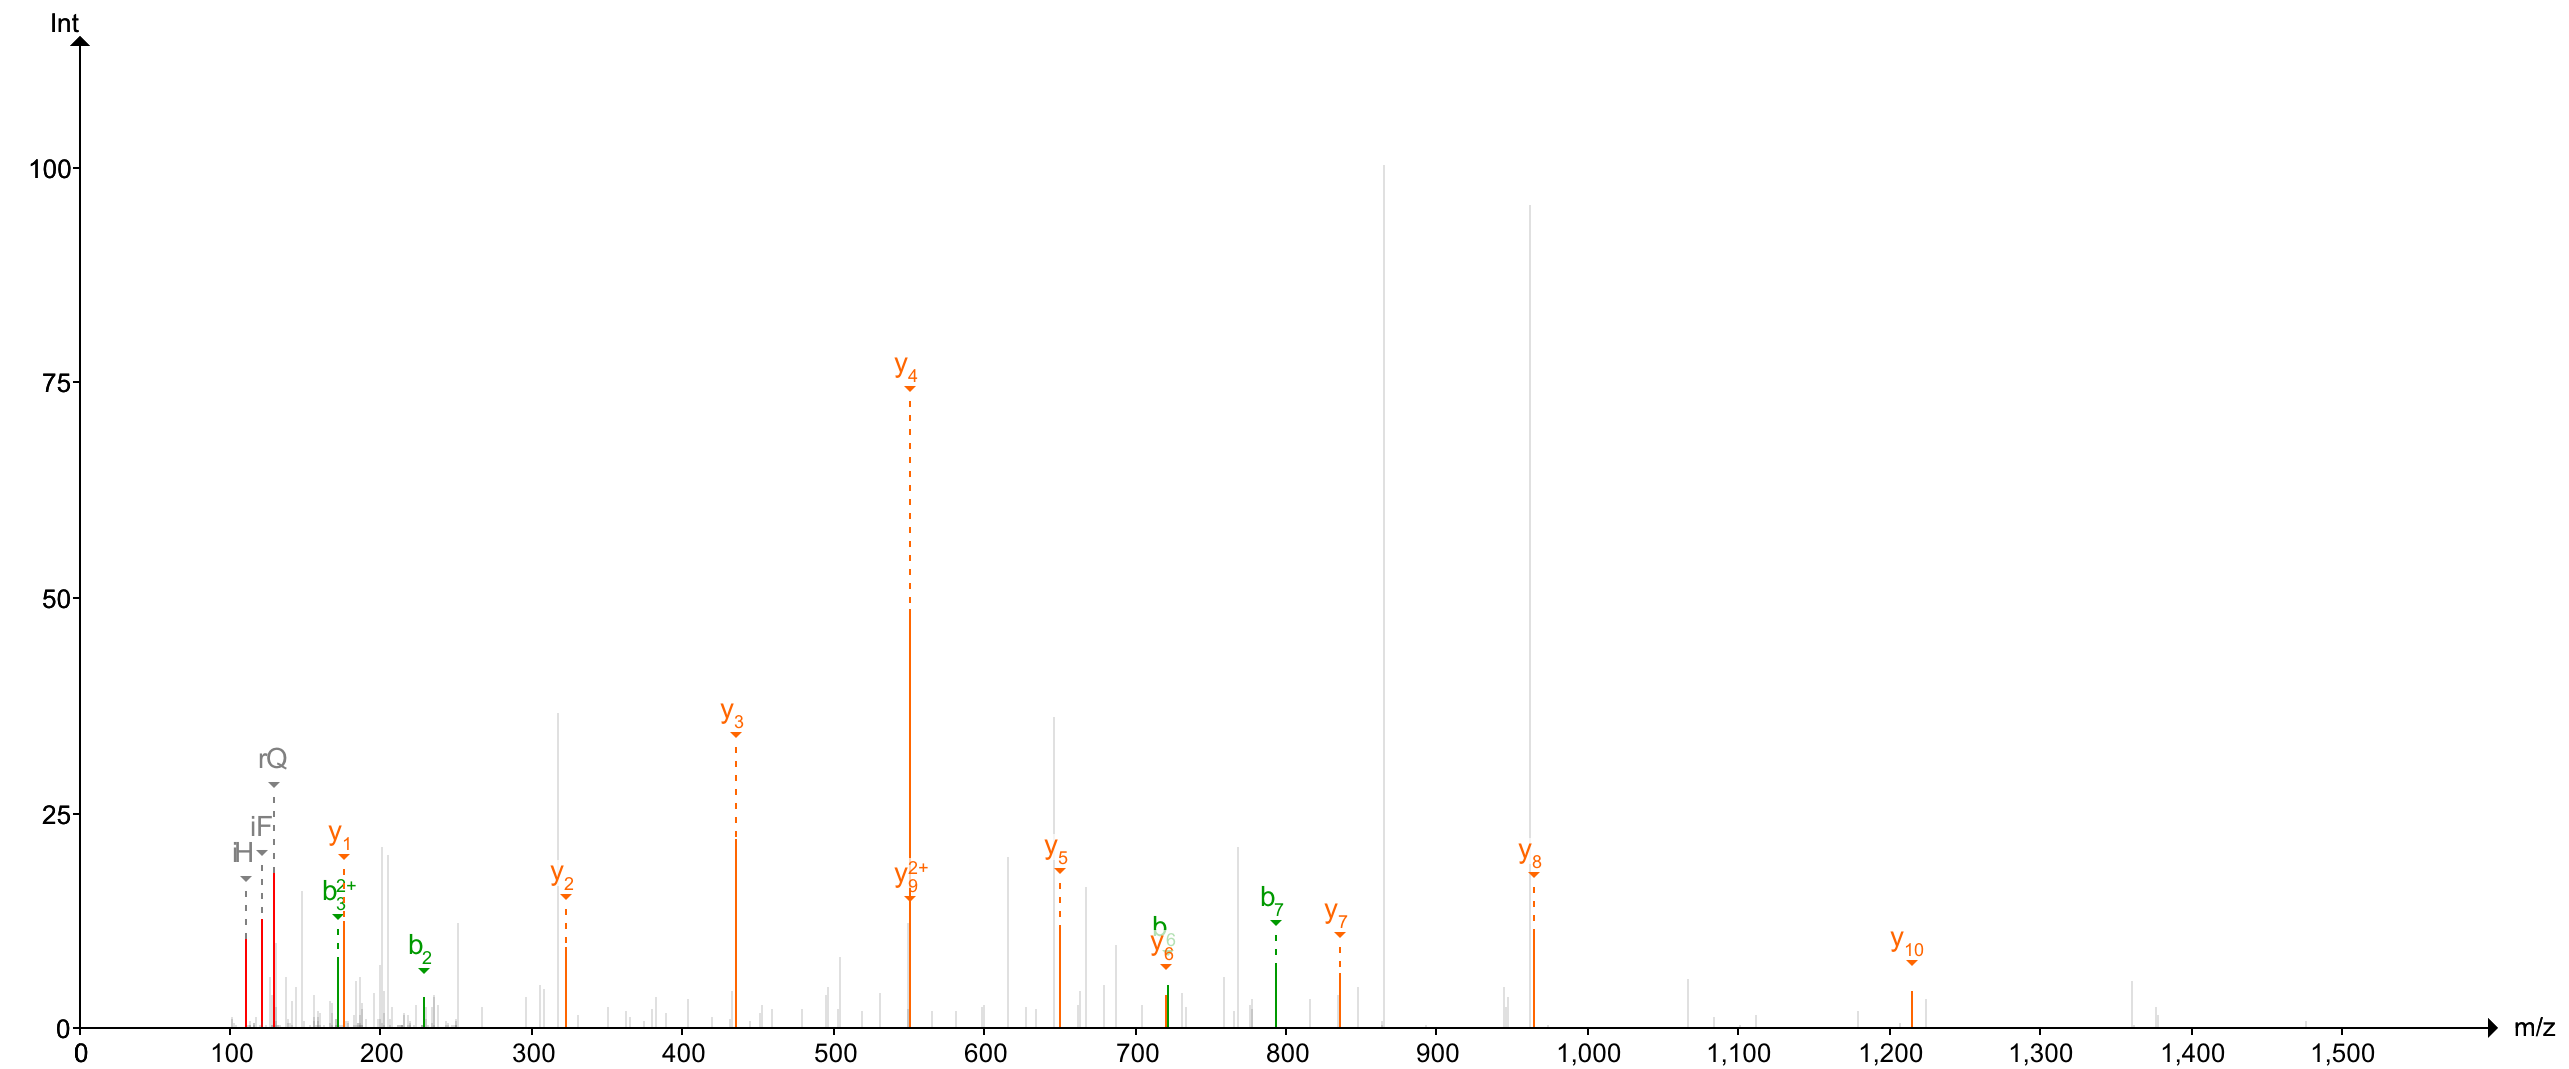



NH<sub>2</sub>-D L I Q V V H E Y T K-COOH

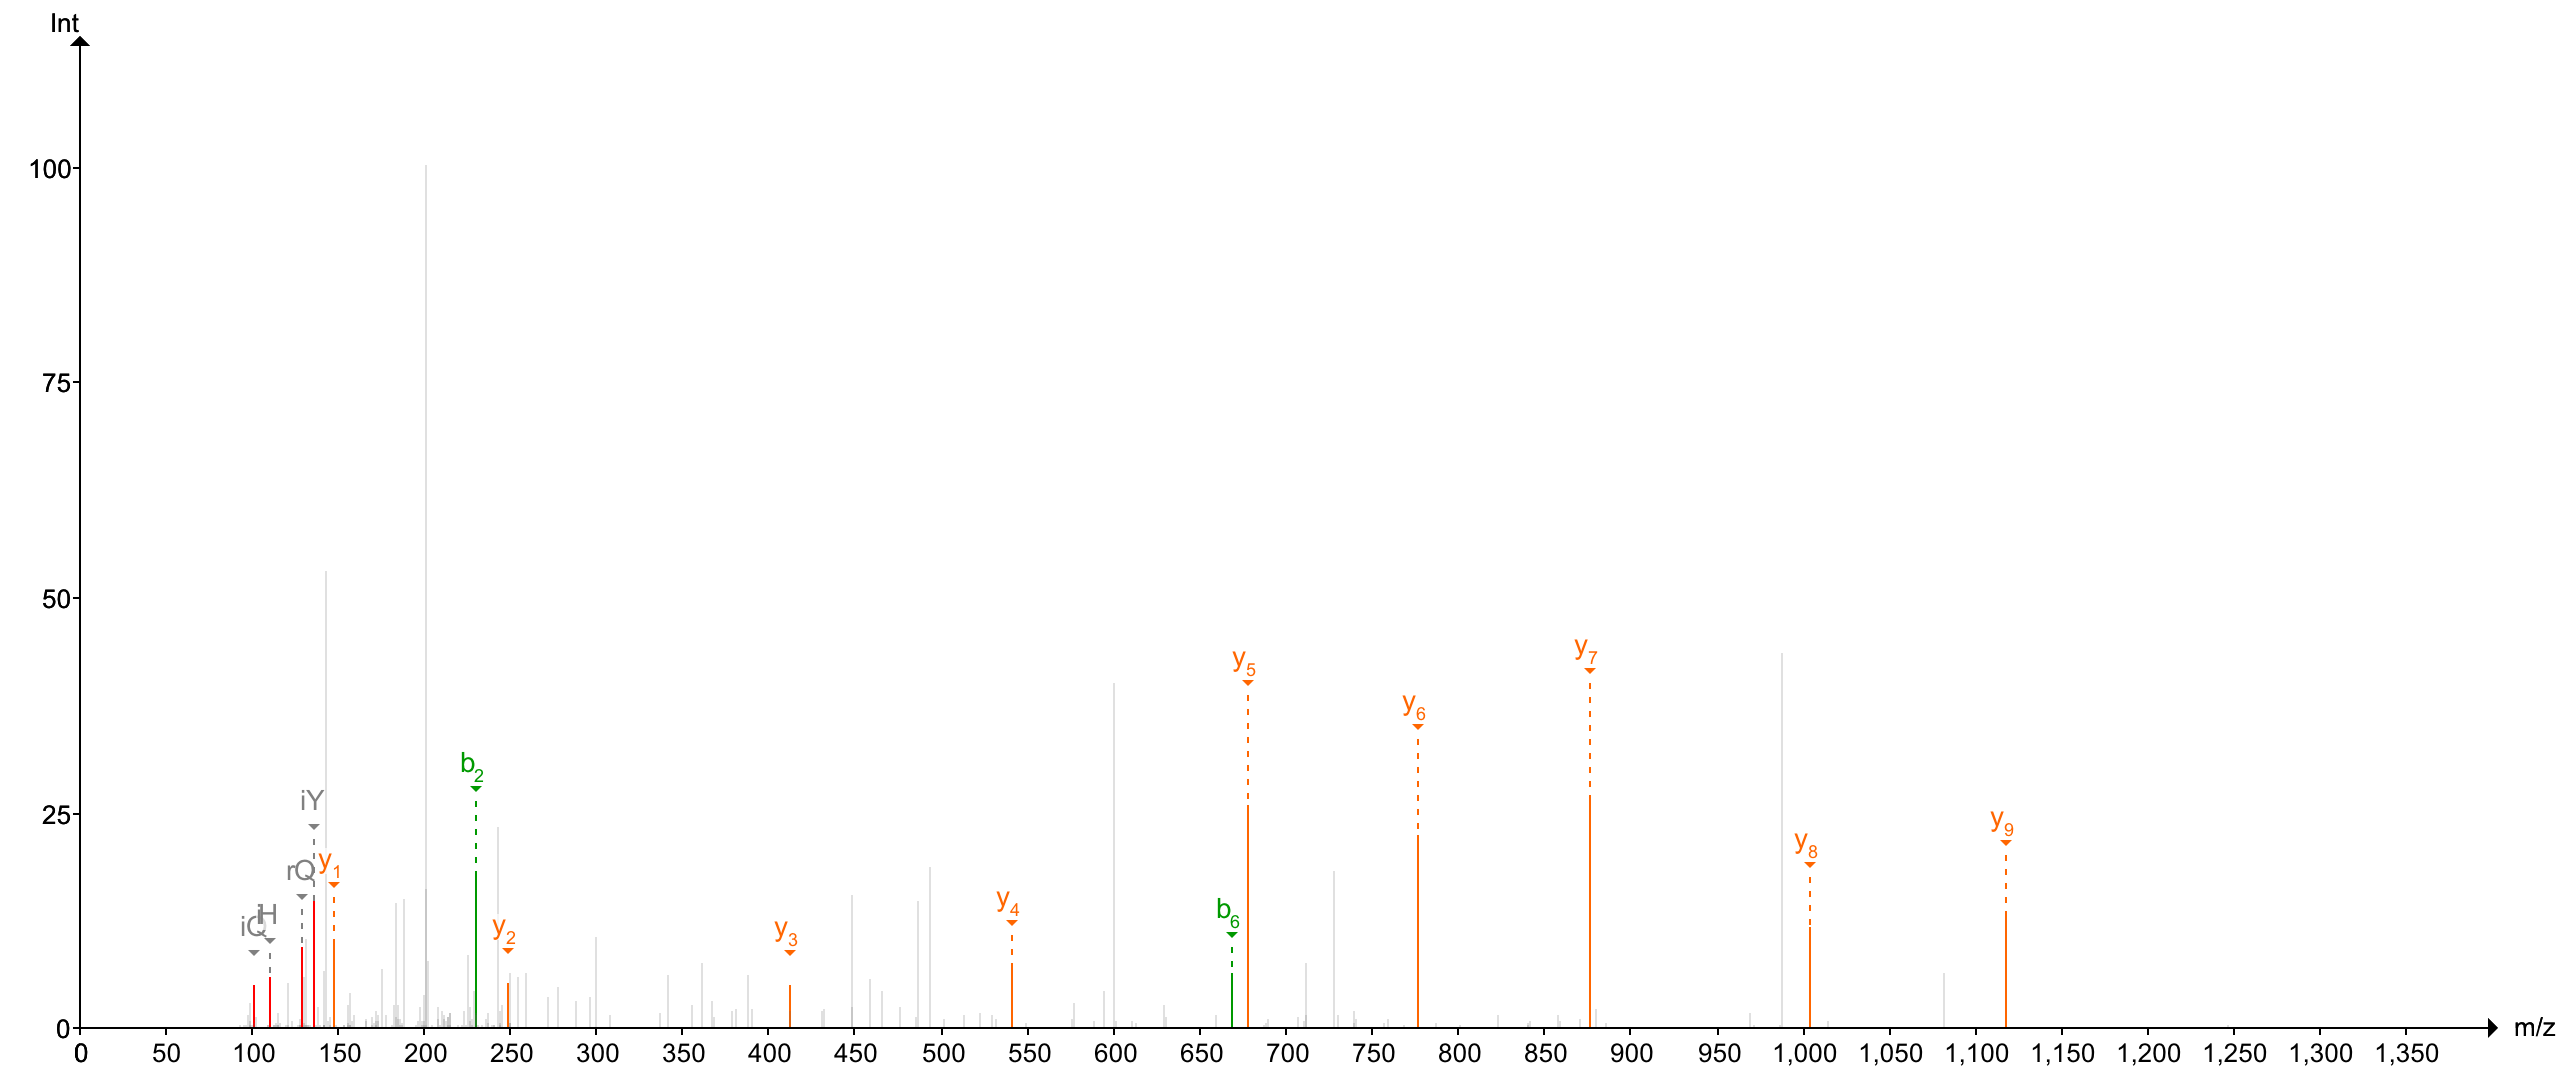

NH<sub>2</sub>-Y A P T T I I A P S P E I D G F E V I Q P L H P D K-COOH

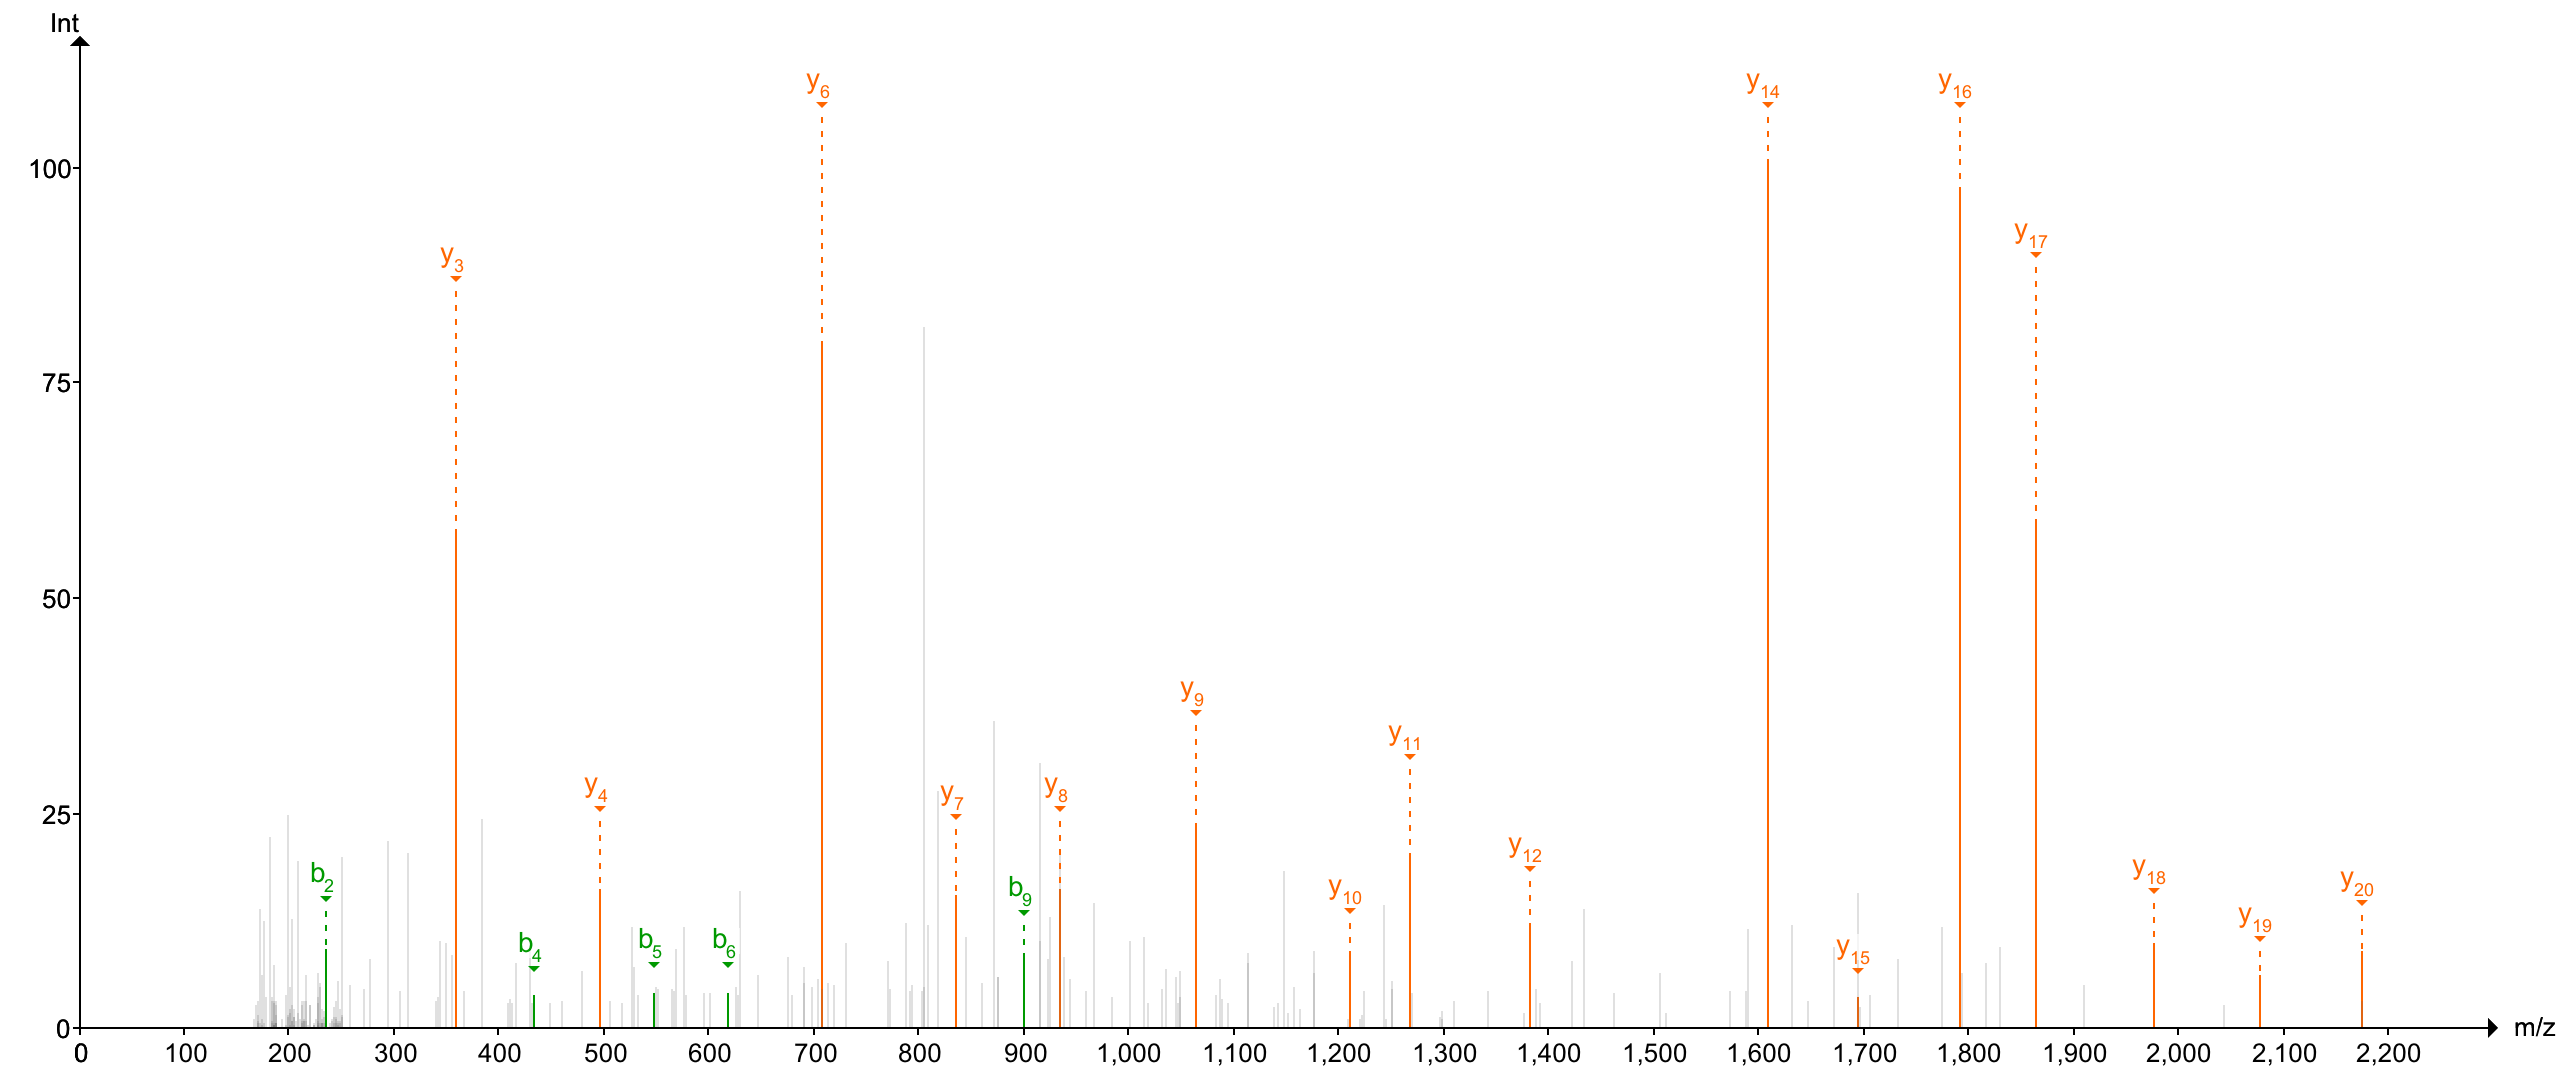

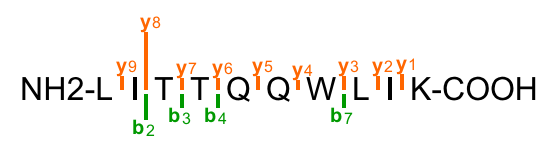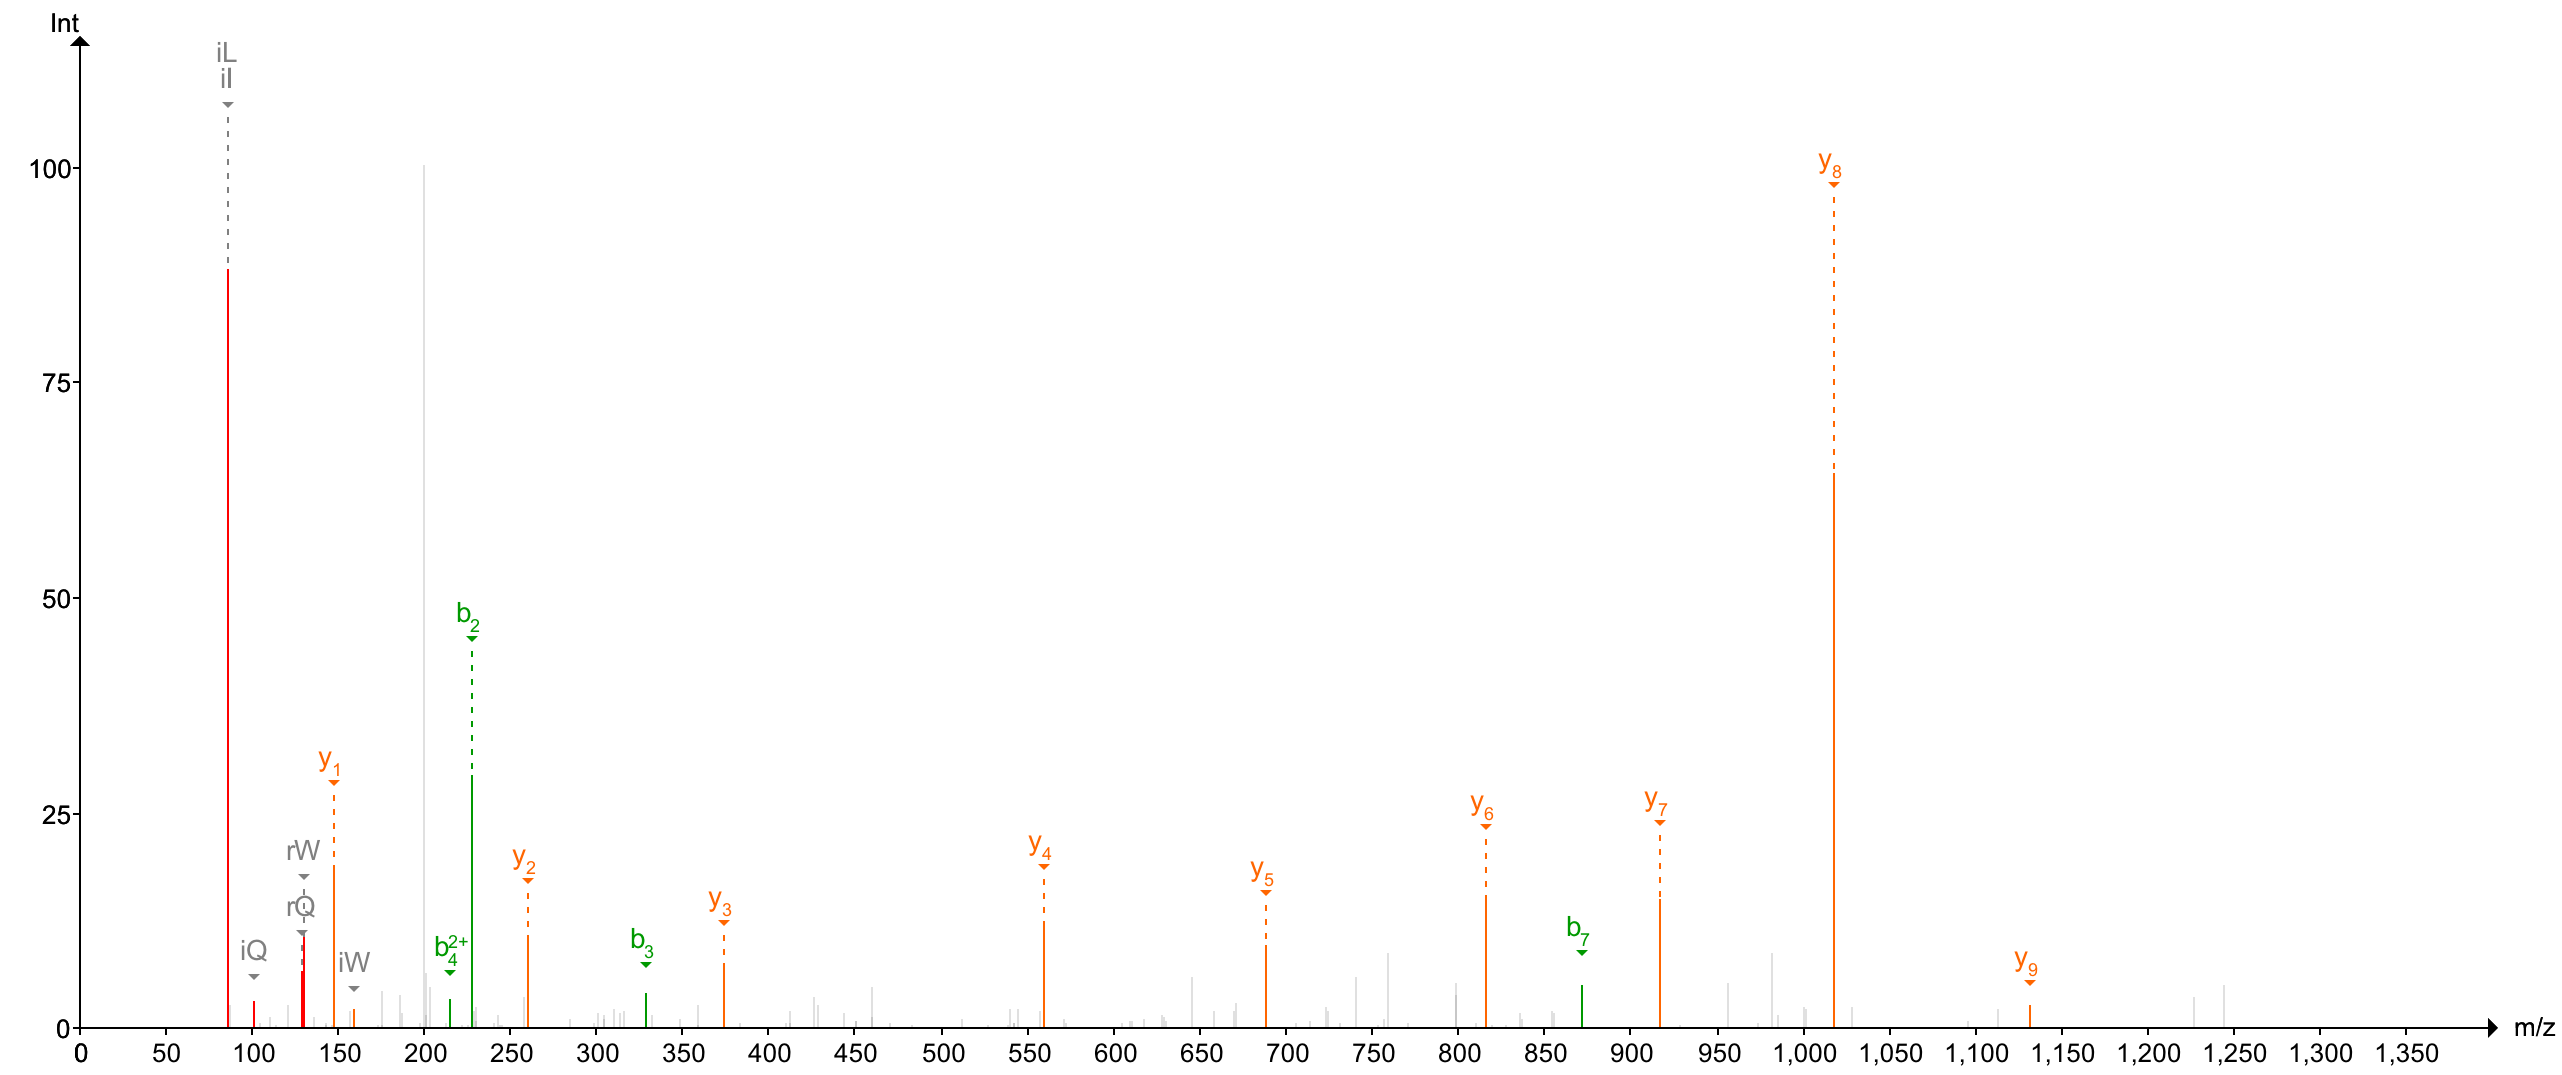

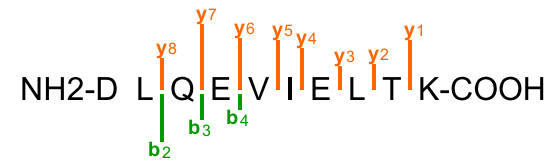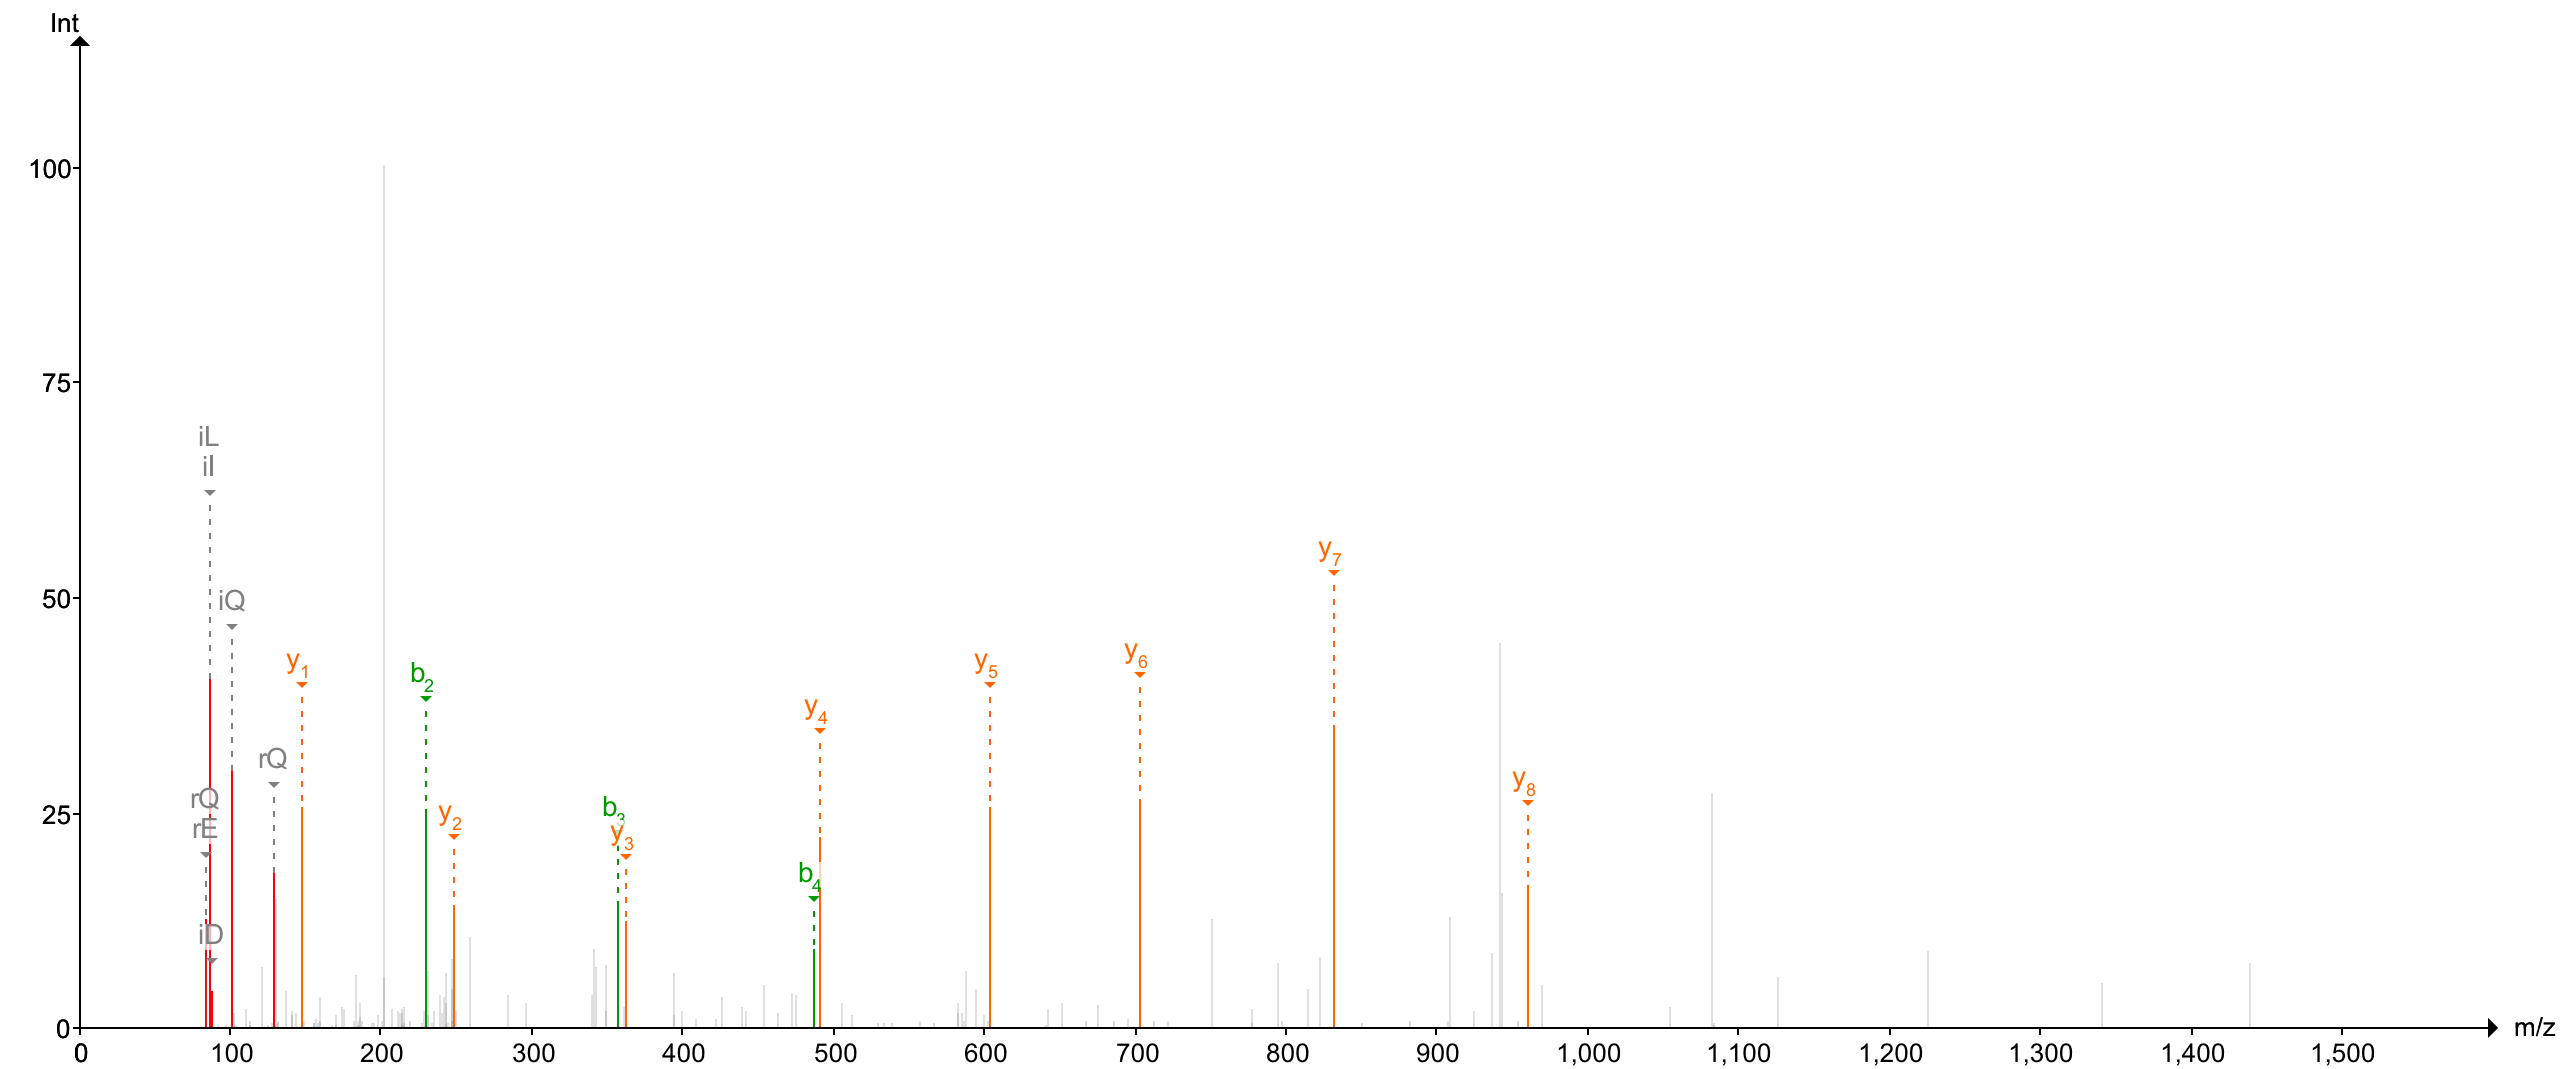

NH<sub>2</sub>-L G L E I D F E S L K-COOH

<sup>y<sub>9</sub></sup> <sup>y<sub>8</sub></sup> <sup>y<sub>7</sub></sup> <sup>y<sub>6</sub></sup> <sup>y<sub>5</sub></sup> <sup>y<sub>4</sub></sup> <sup>y<sub>3</sub></sup> <sup>y<sub>2</sub></sup> <sup>y<sub>1</sub></sup>  
<sup>b<sub>3</sub></sup> <sup>b<sub>4</sub></sup>  
<sup>b<sub>2</sub></sup>

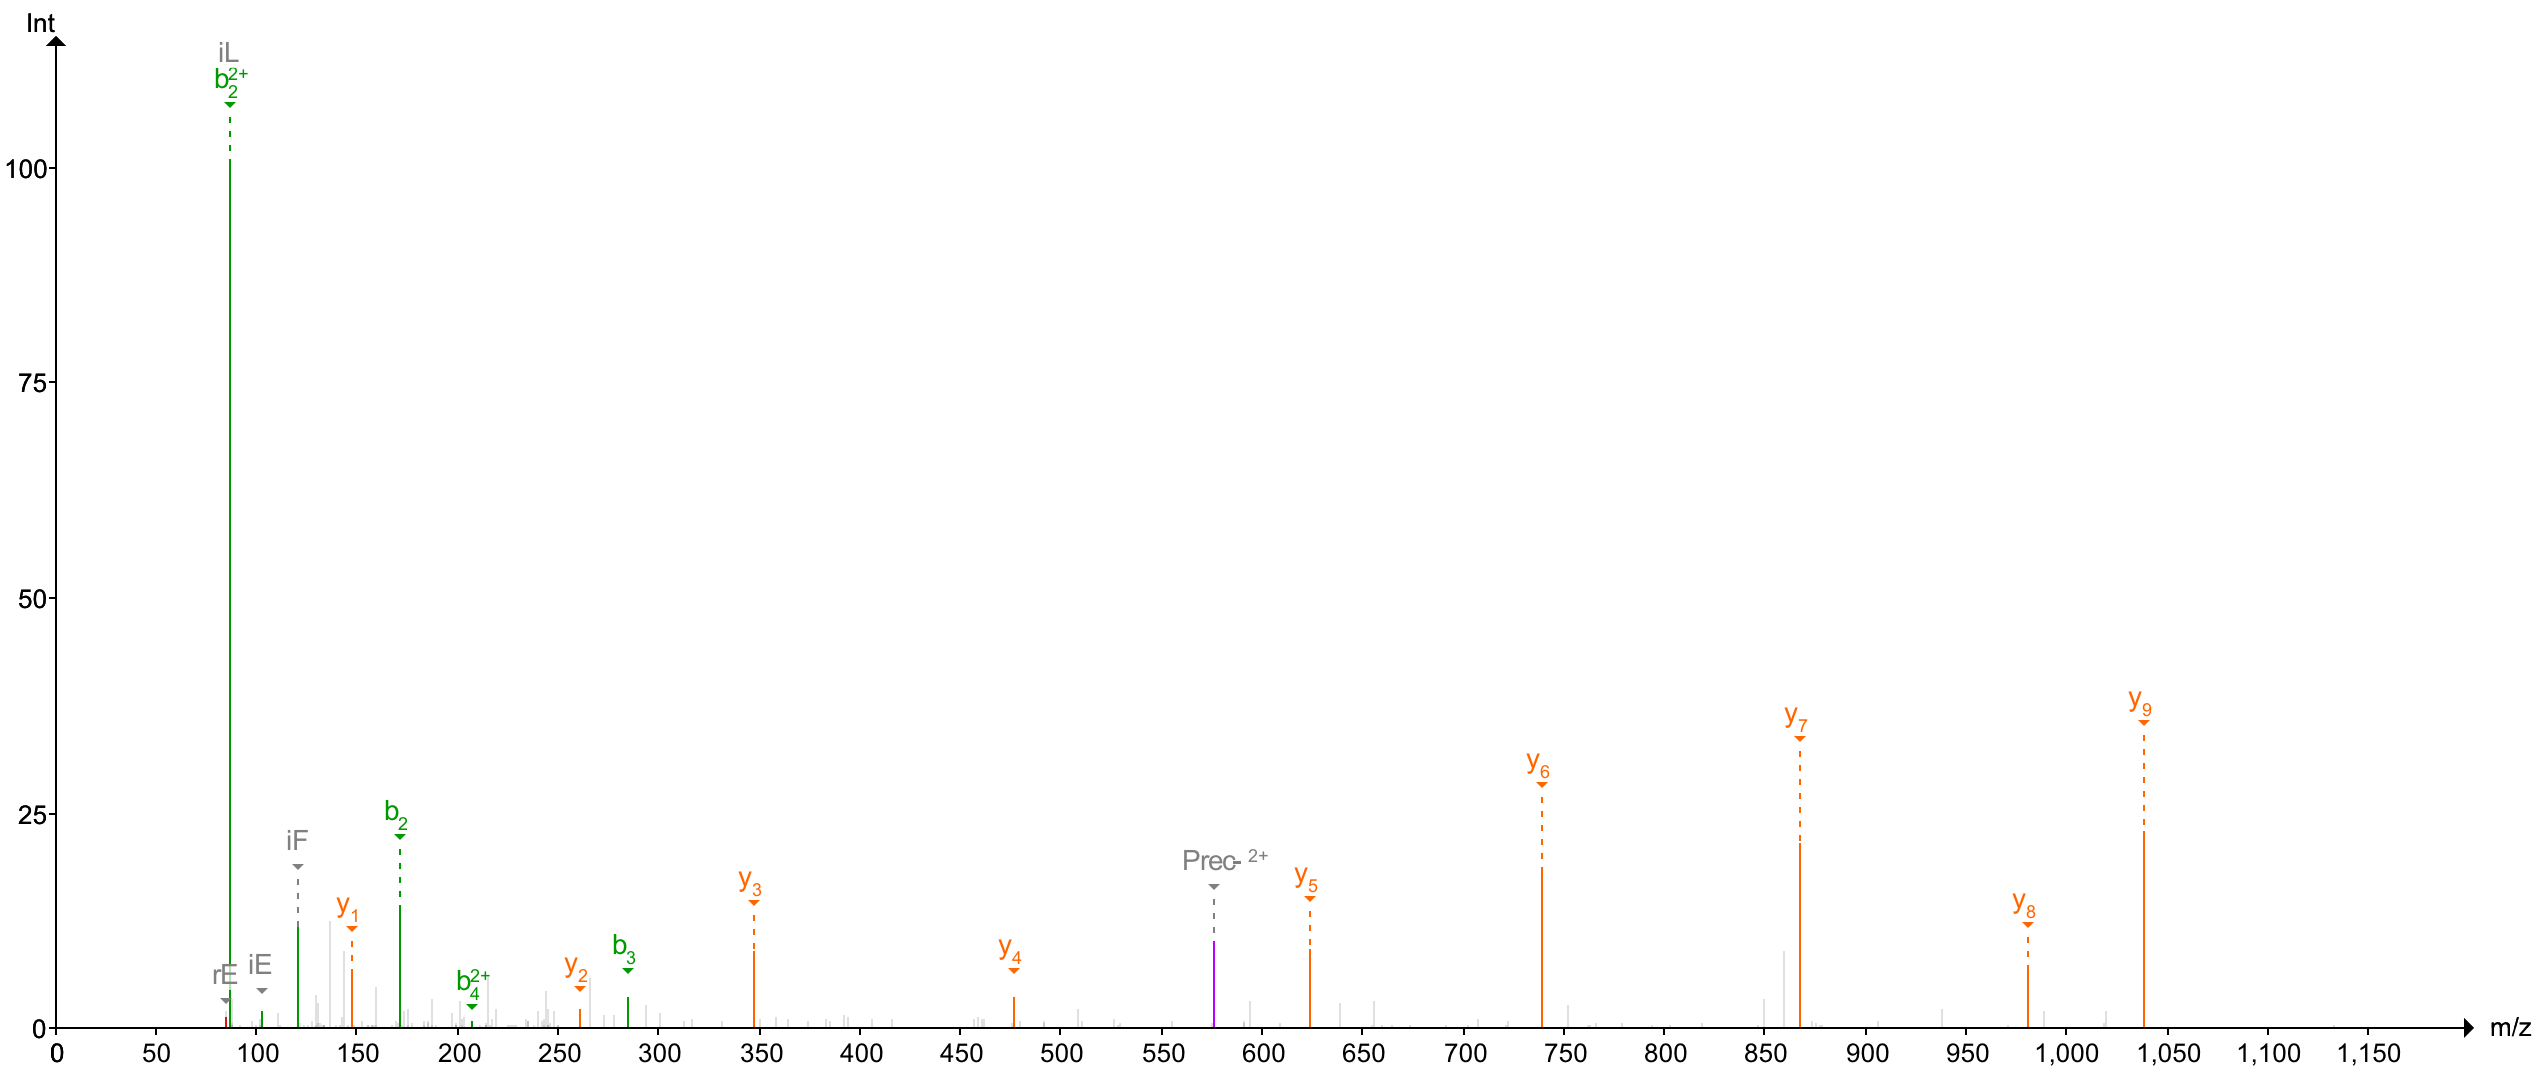

NH2-V D A E D G Q Y D V M F I G T D V G T V L K-COOH

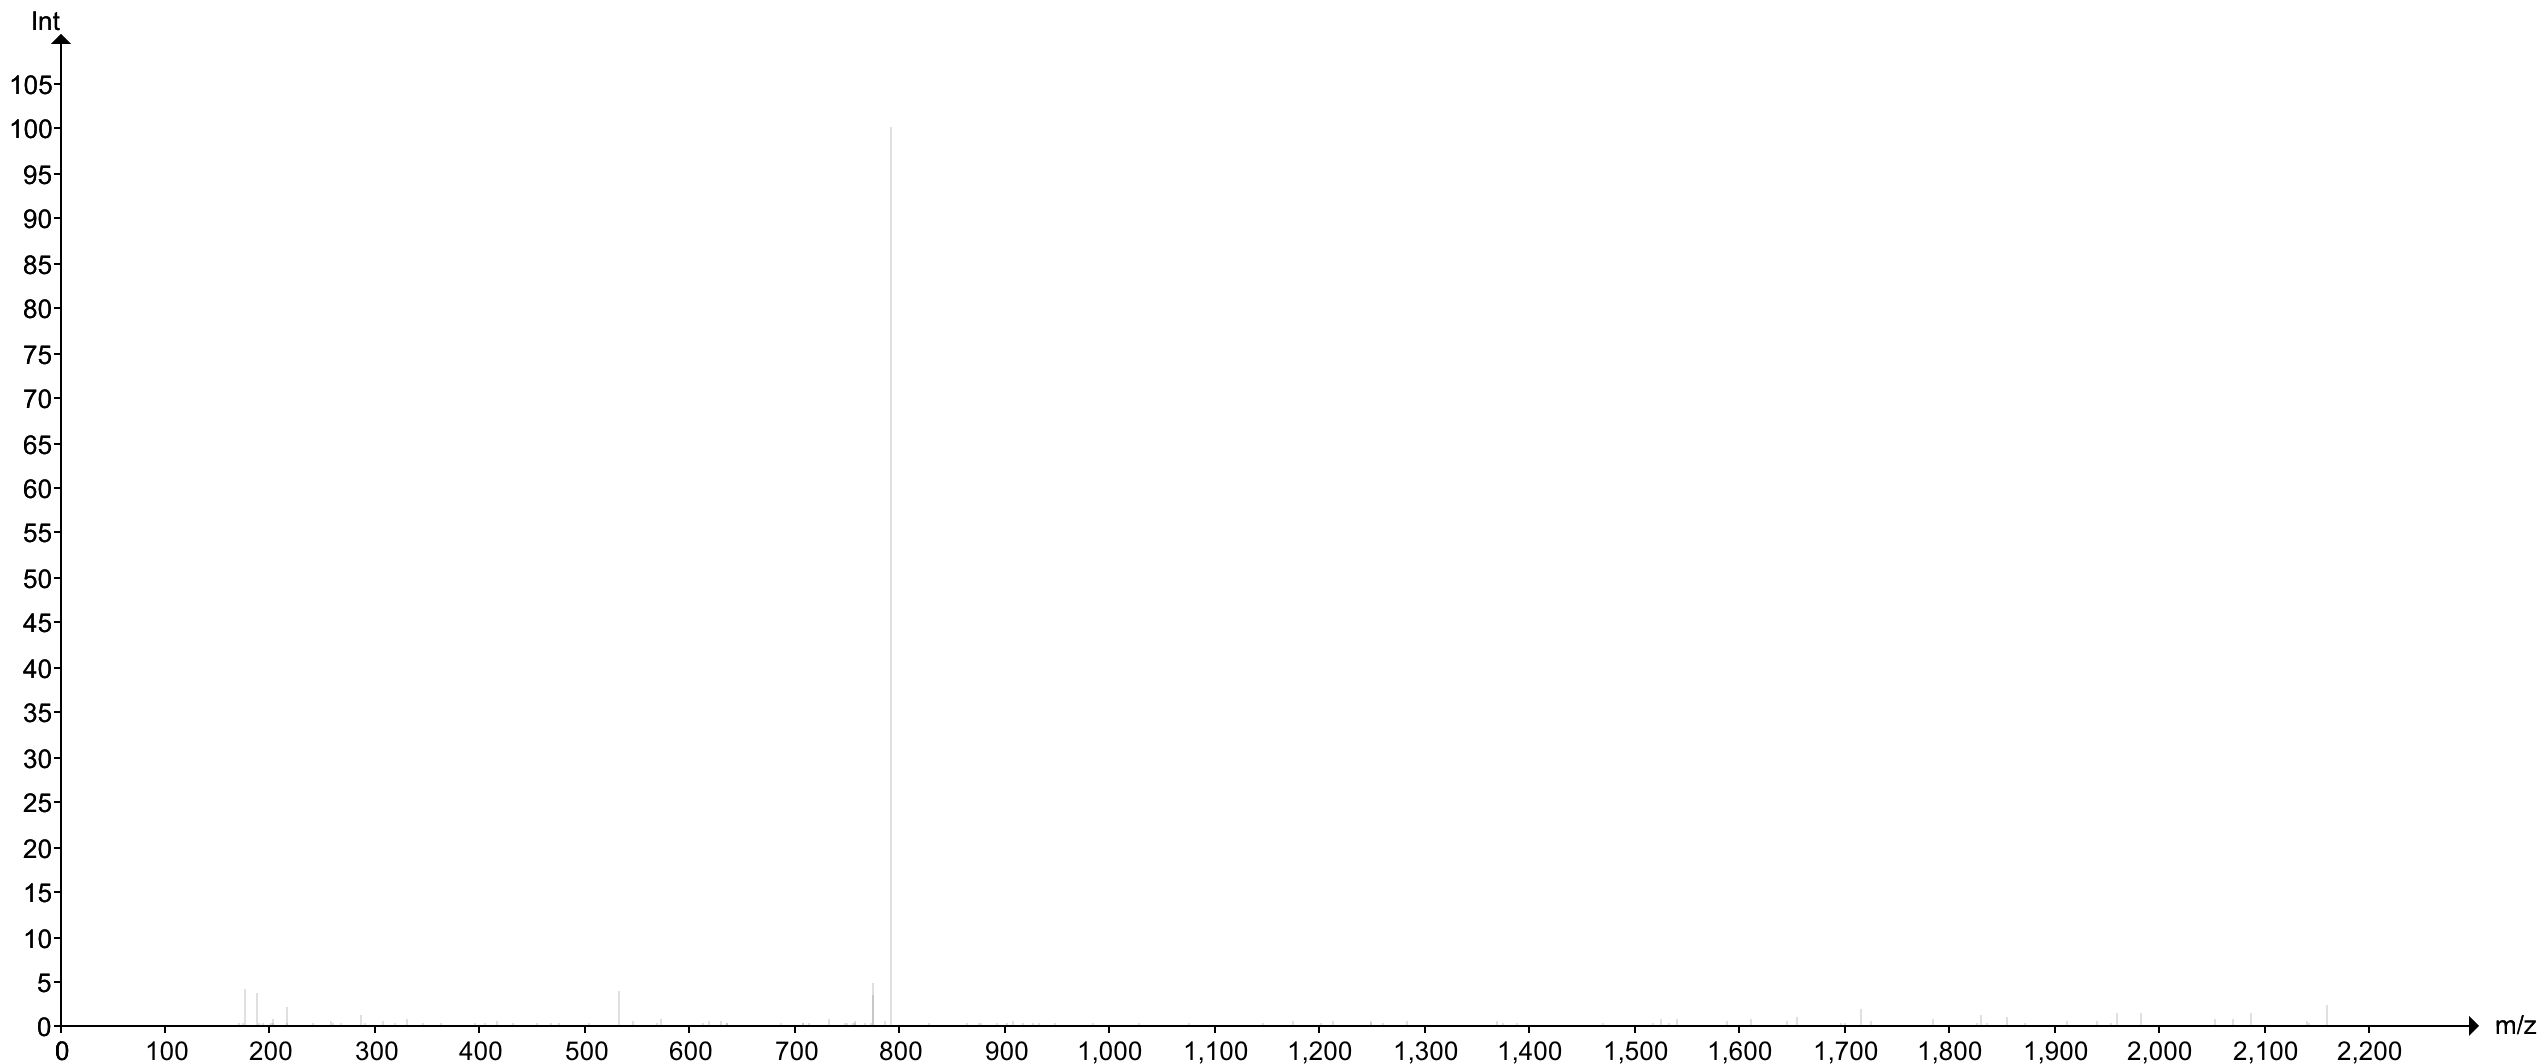

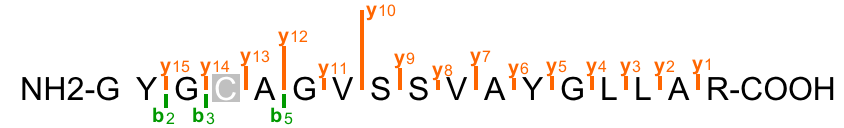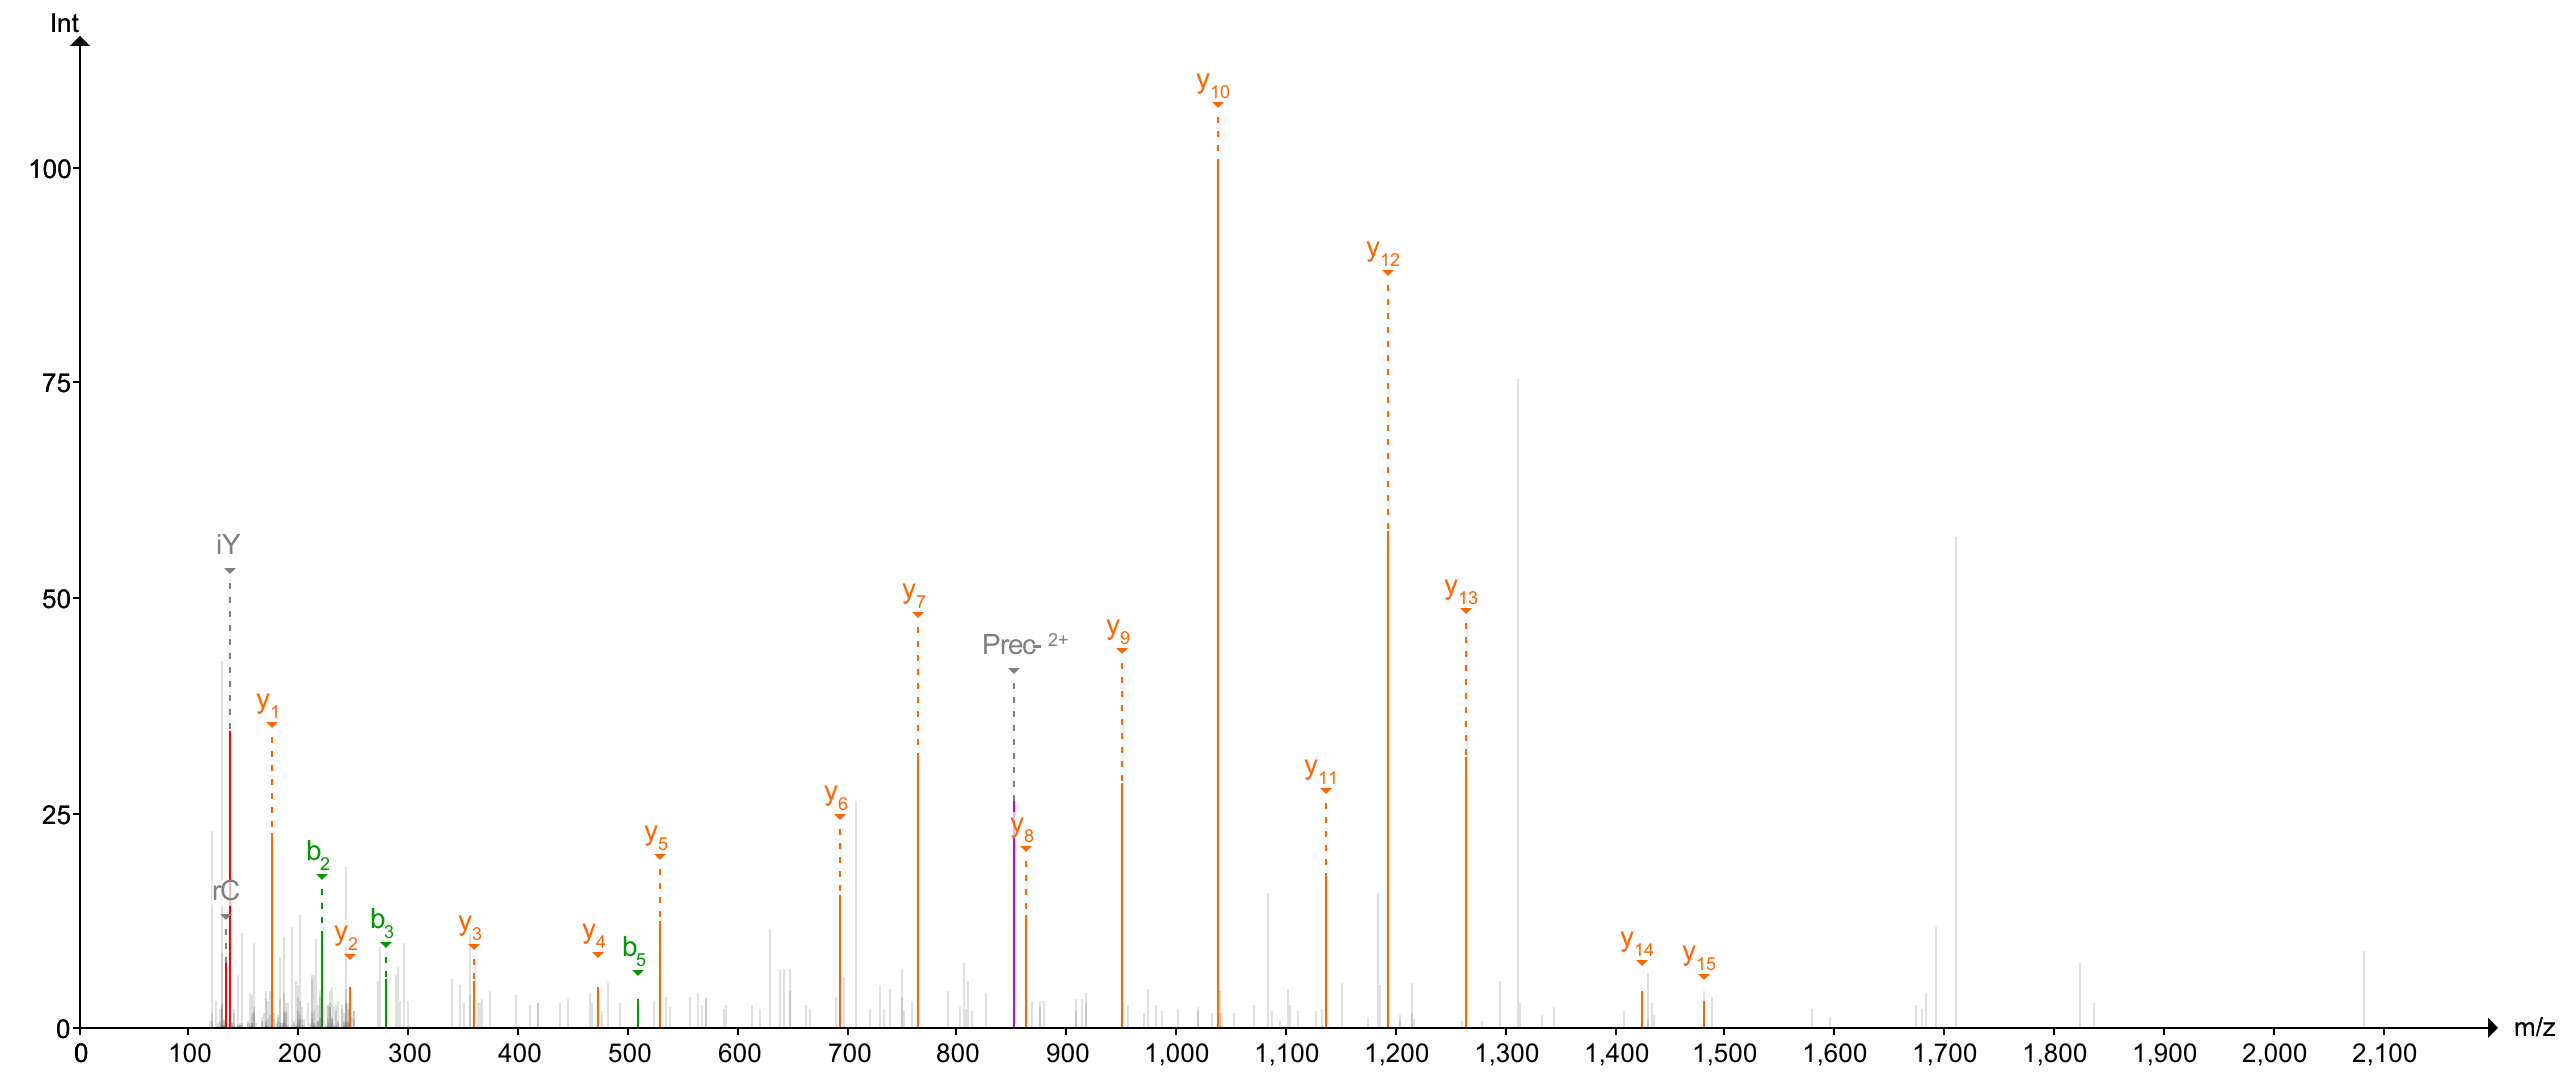

NH<sub>2</sub>-I A<sub>1</sub> N L A W L V A K-COOH  
b<sub>2</sub>

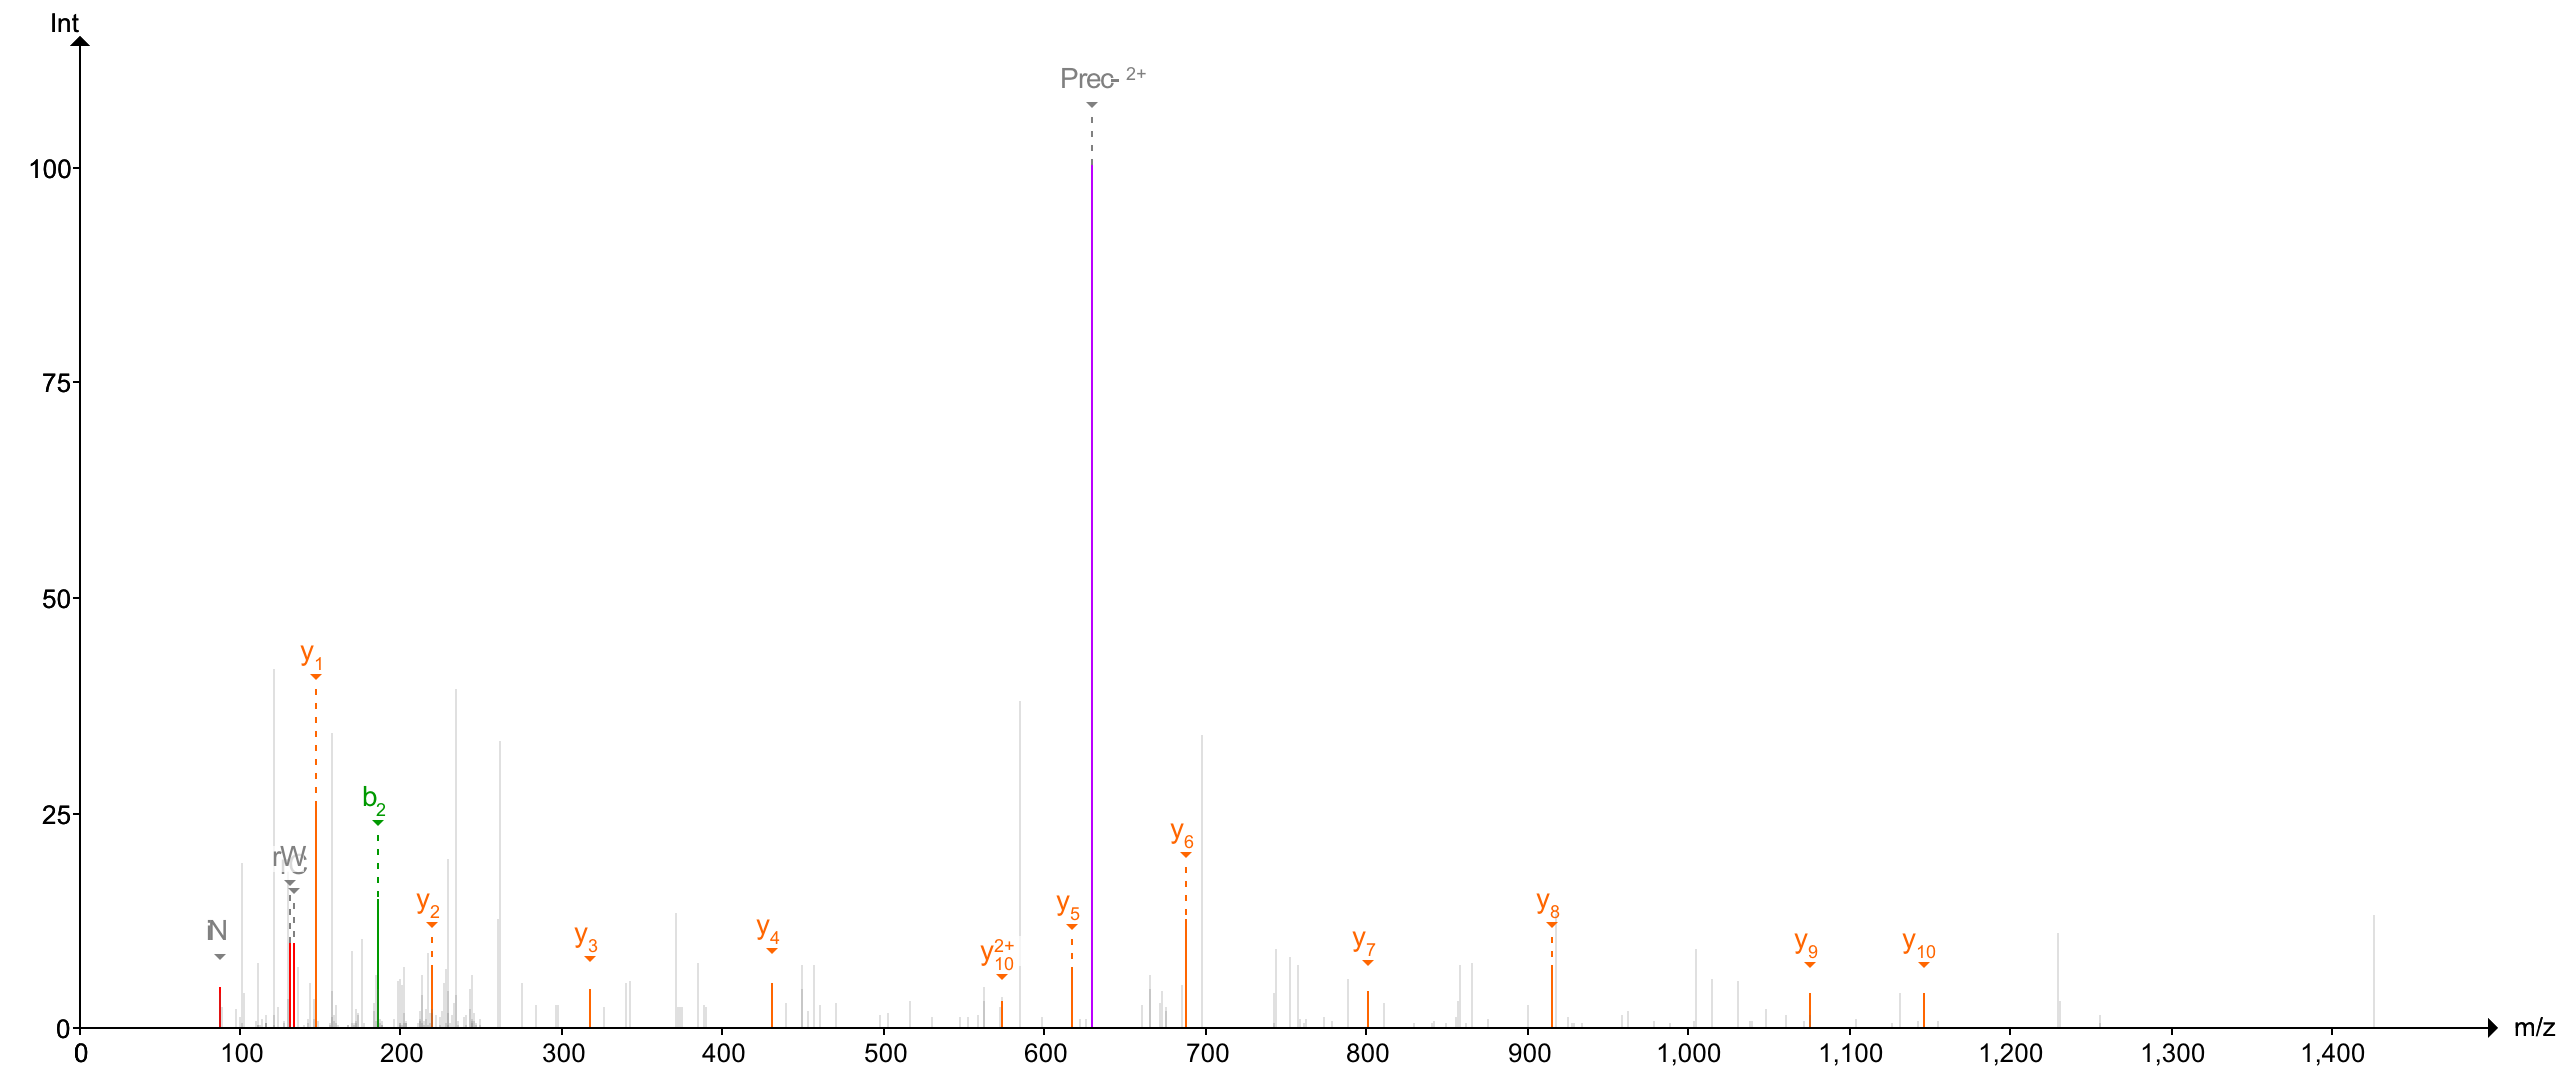



NH<sub>2</sub>-A V<sub>1</sub>S<sub>1</sub>I<sub>1</sub>L<sub>1</sub>P<sub>1</sub>L<sub>1</sub>L<sub>1</sub>G<sub>1</sub>H<sub>1</sub>G<sub>1</sub>V<sub>1</sub>P<sub>1</sub>R-COOH  
b<sub>2</sub> b<sub>3</sub> y<sup>10</sup> y<sup>9</sup> y<sup>8</sup> y<sup>7</sup> y<sup>6</sup> y<sup>5</sup> y<sup>4</sup> y<sup>2</sup> y<sup>1</sup>  
b<sub>11</sub>

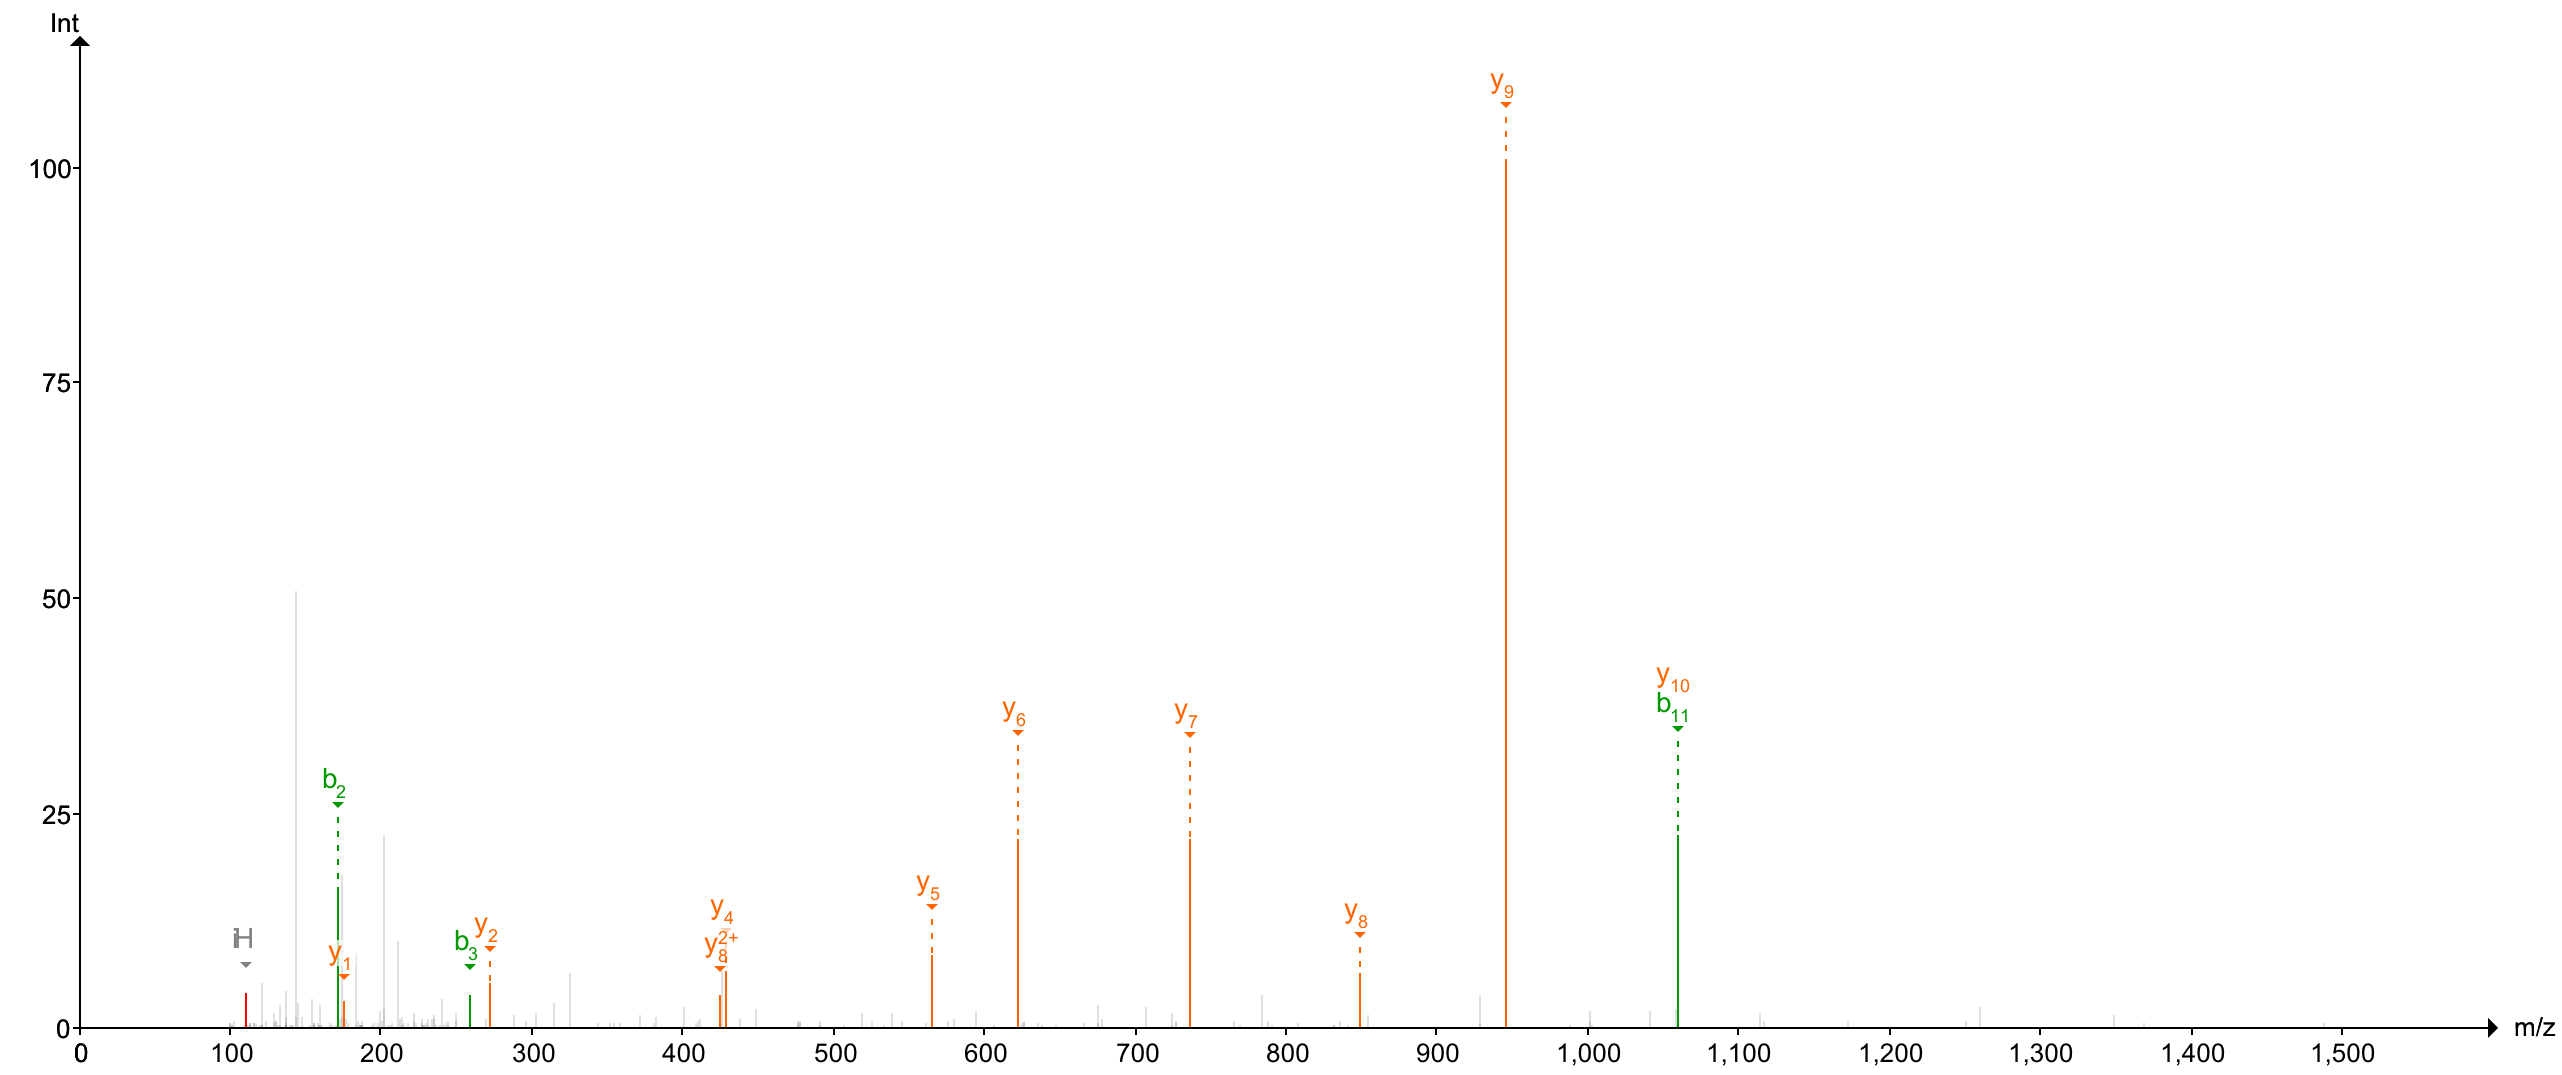

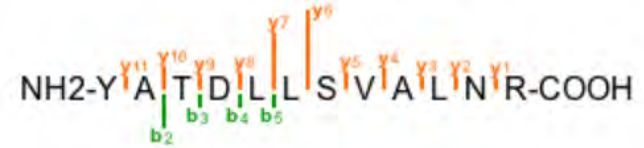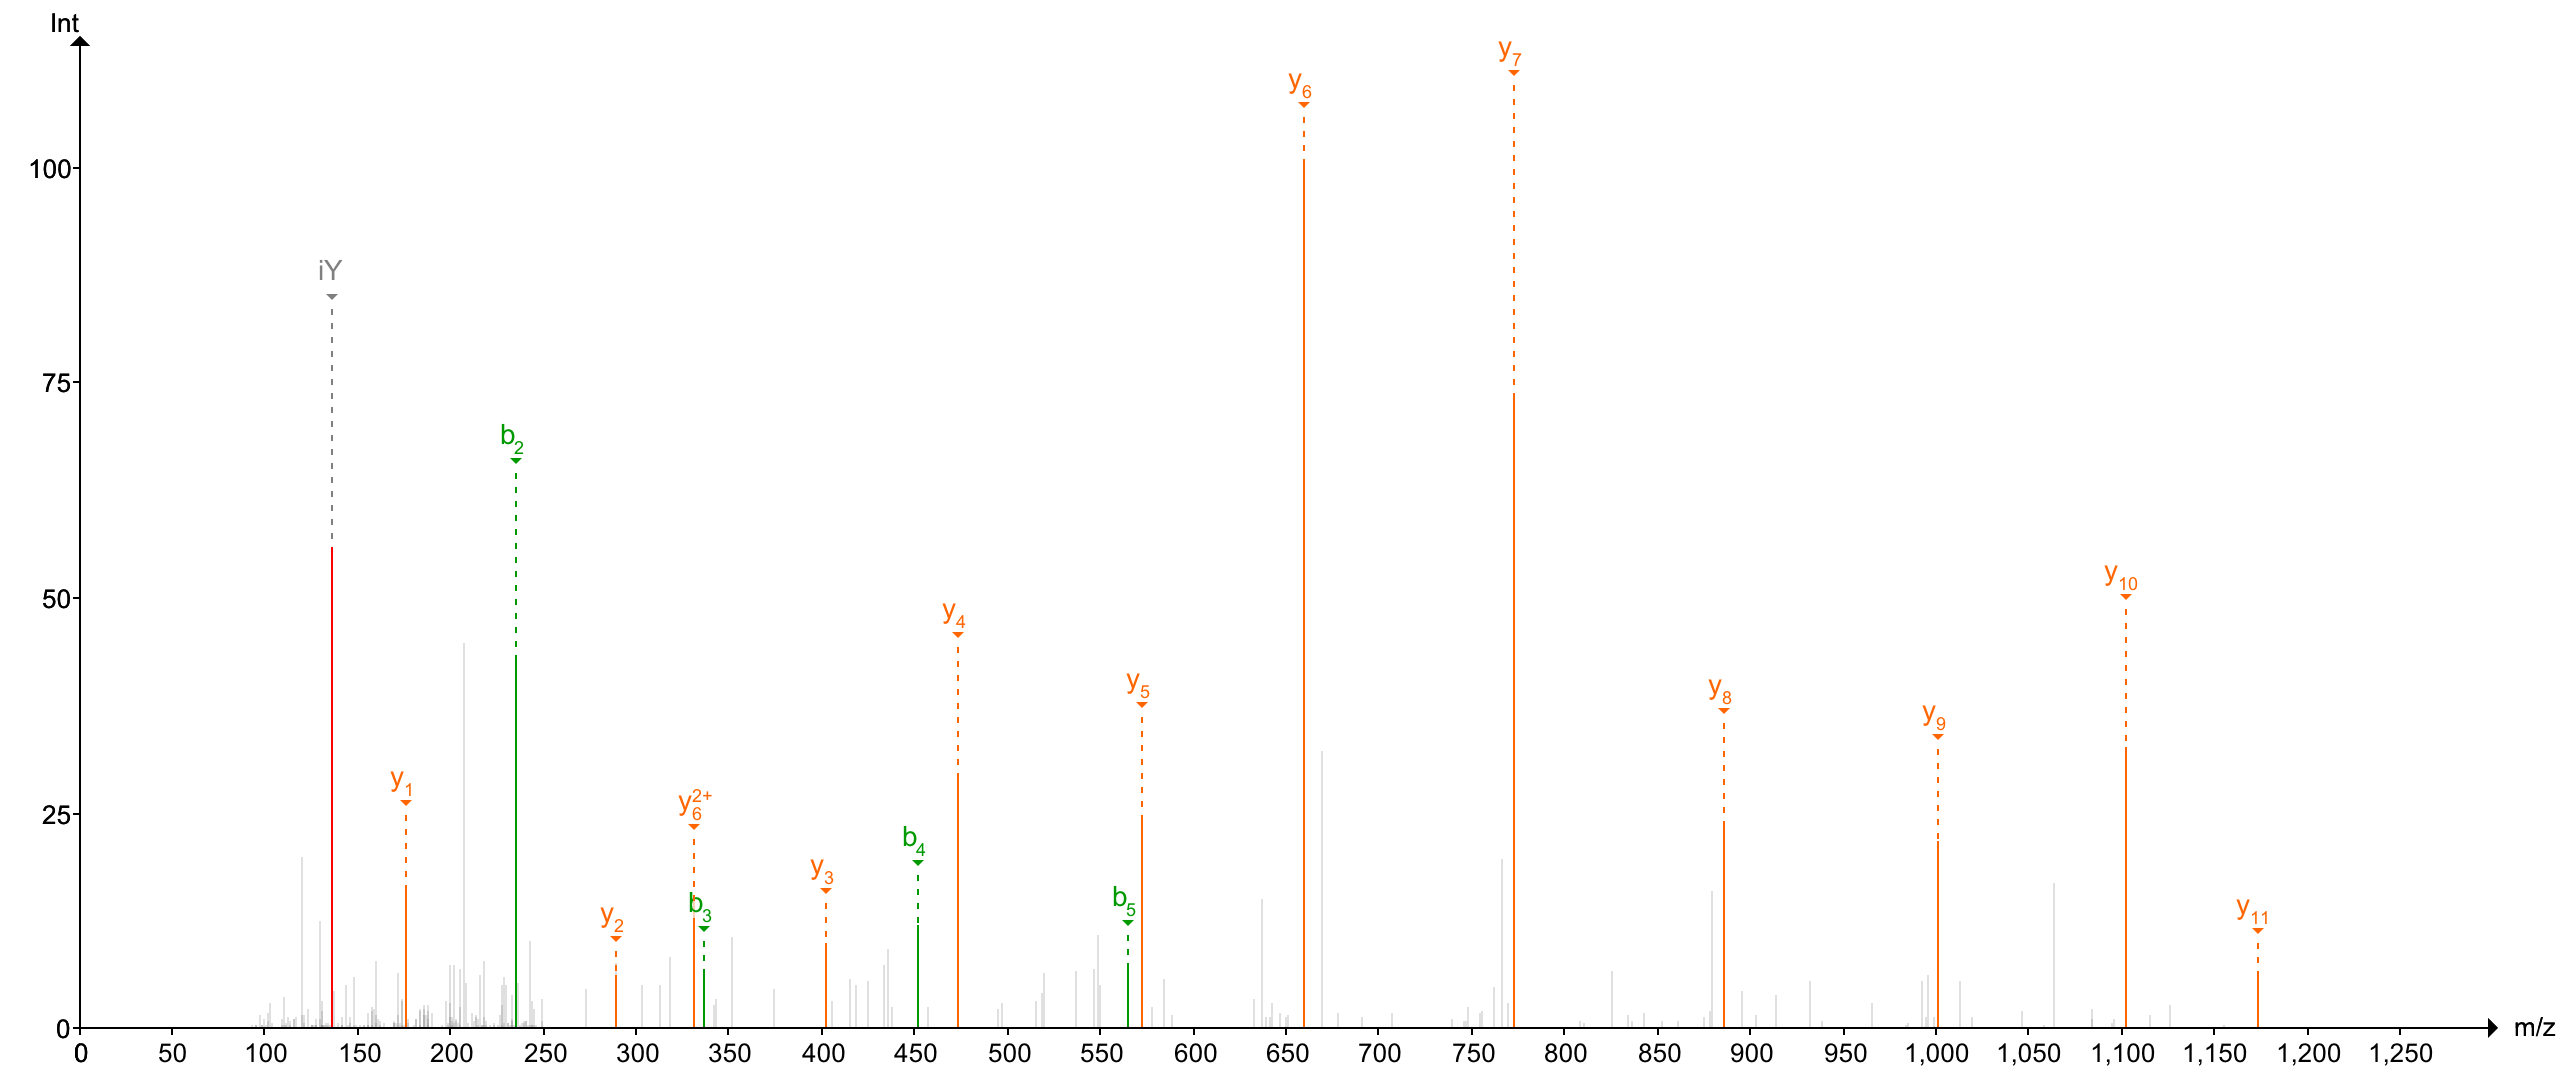

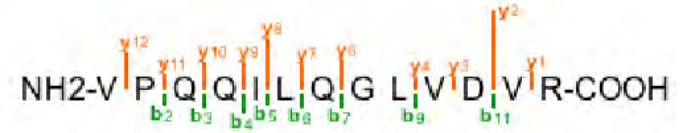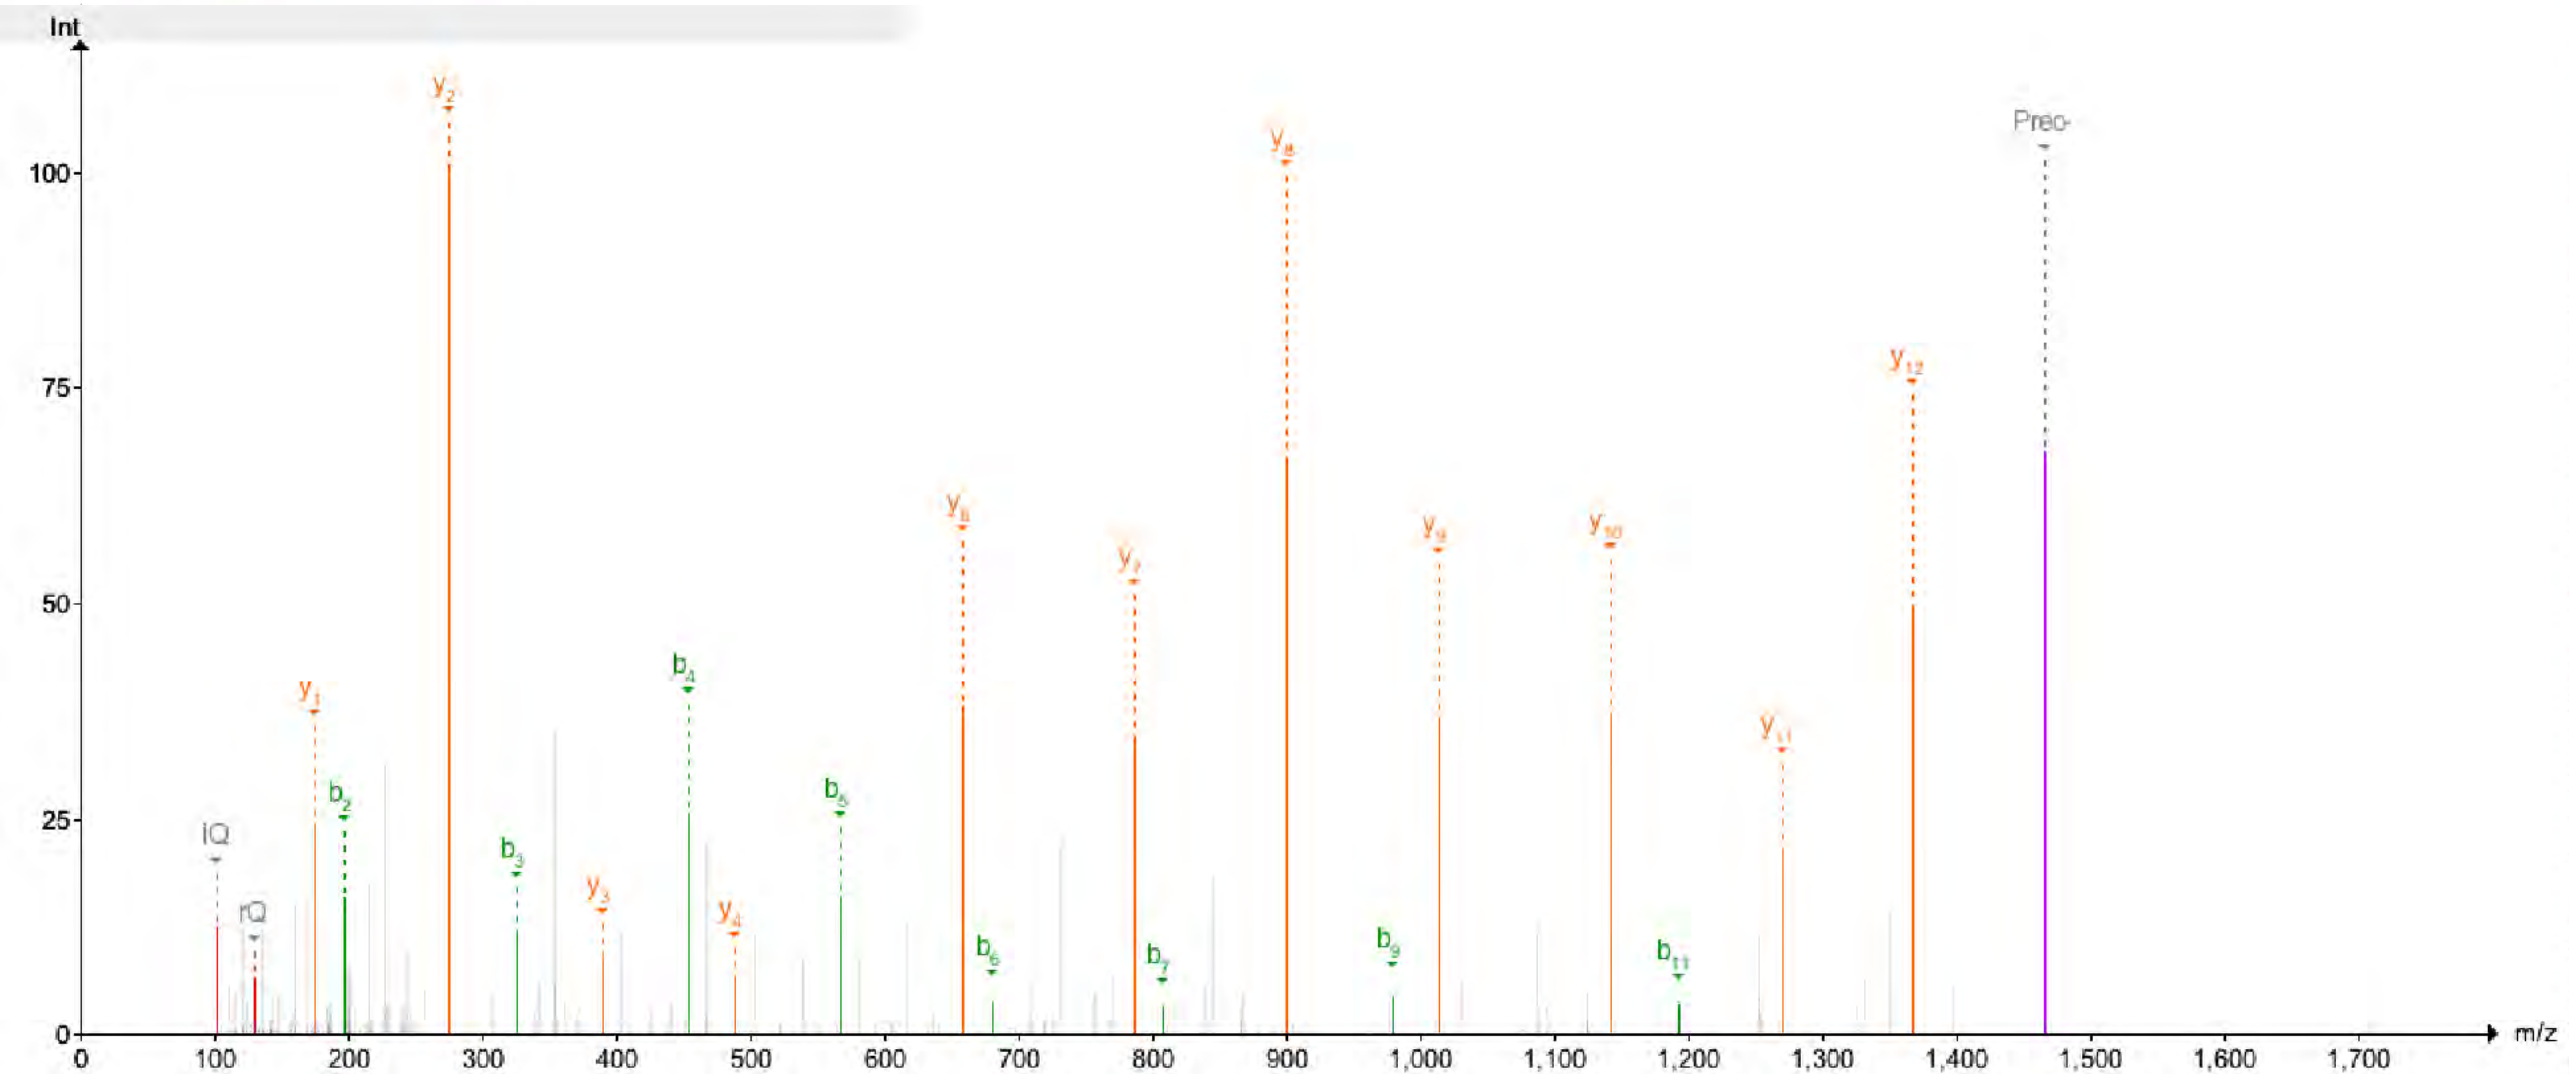

NH<sub>2</sub>-L L P F L S N P Y R-COOH

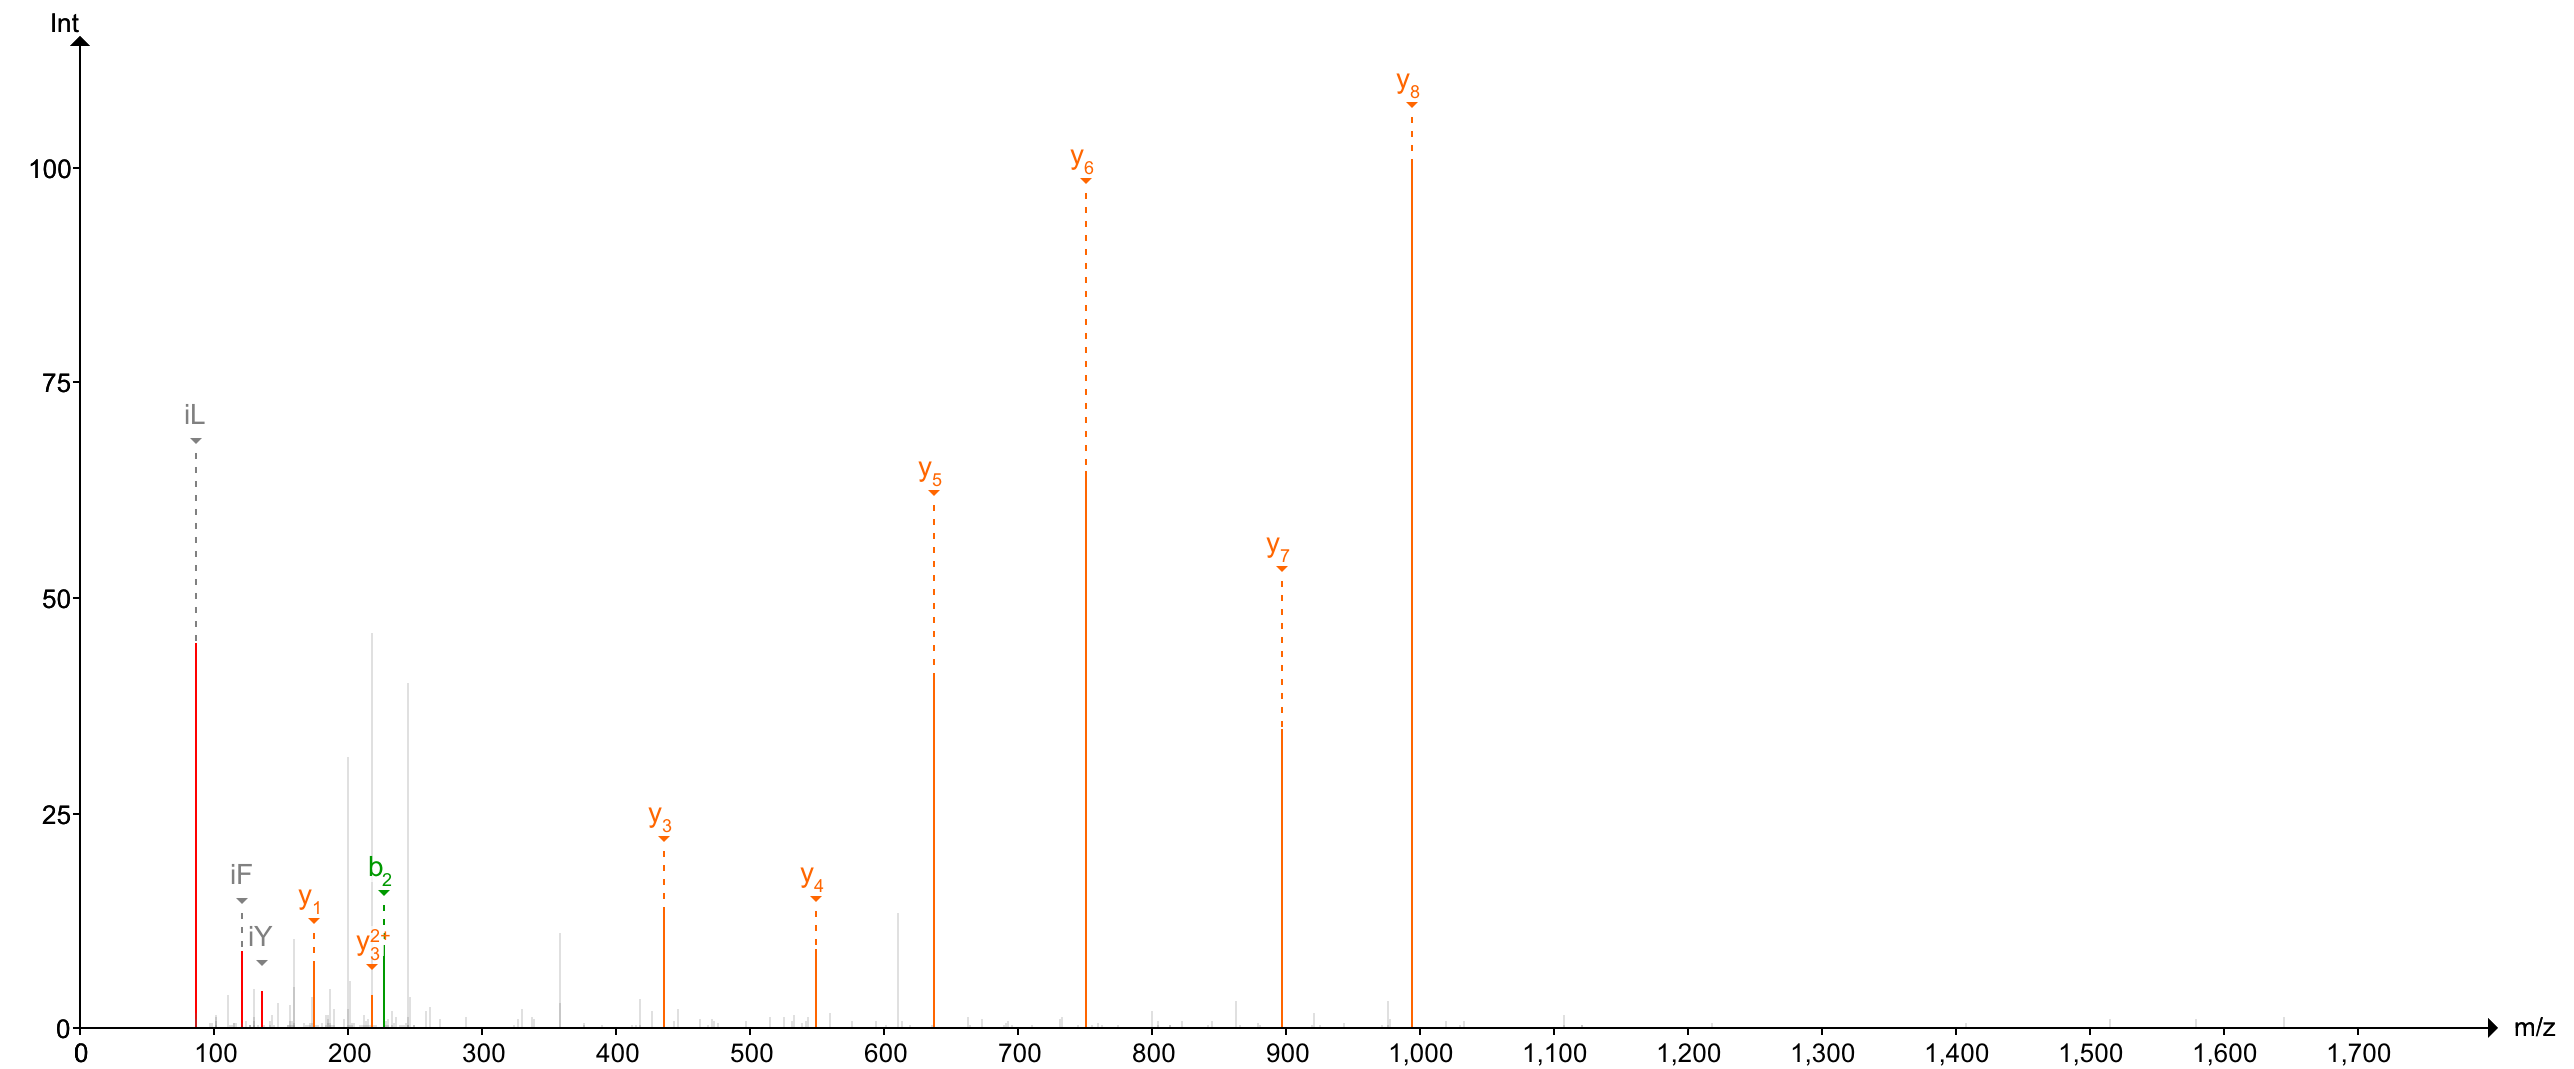

NH<sub>2</sub>-V A **P** Q **N** A E Y L I V F P **K**-COOH

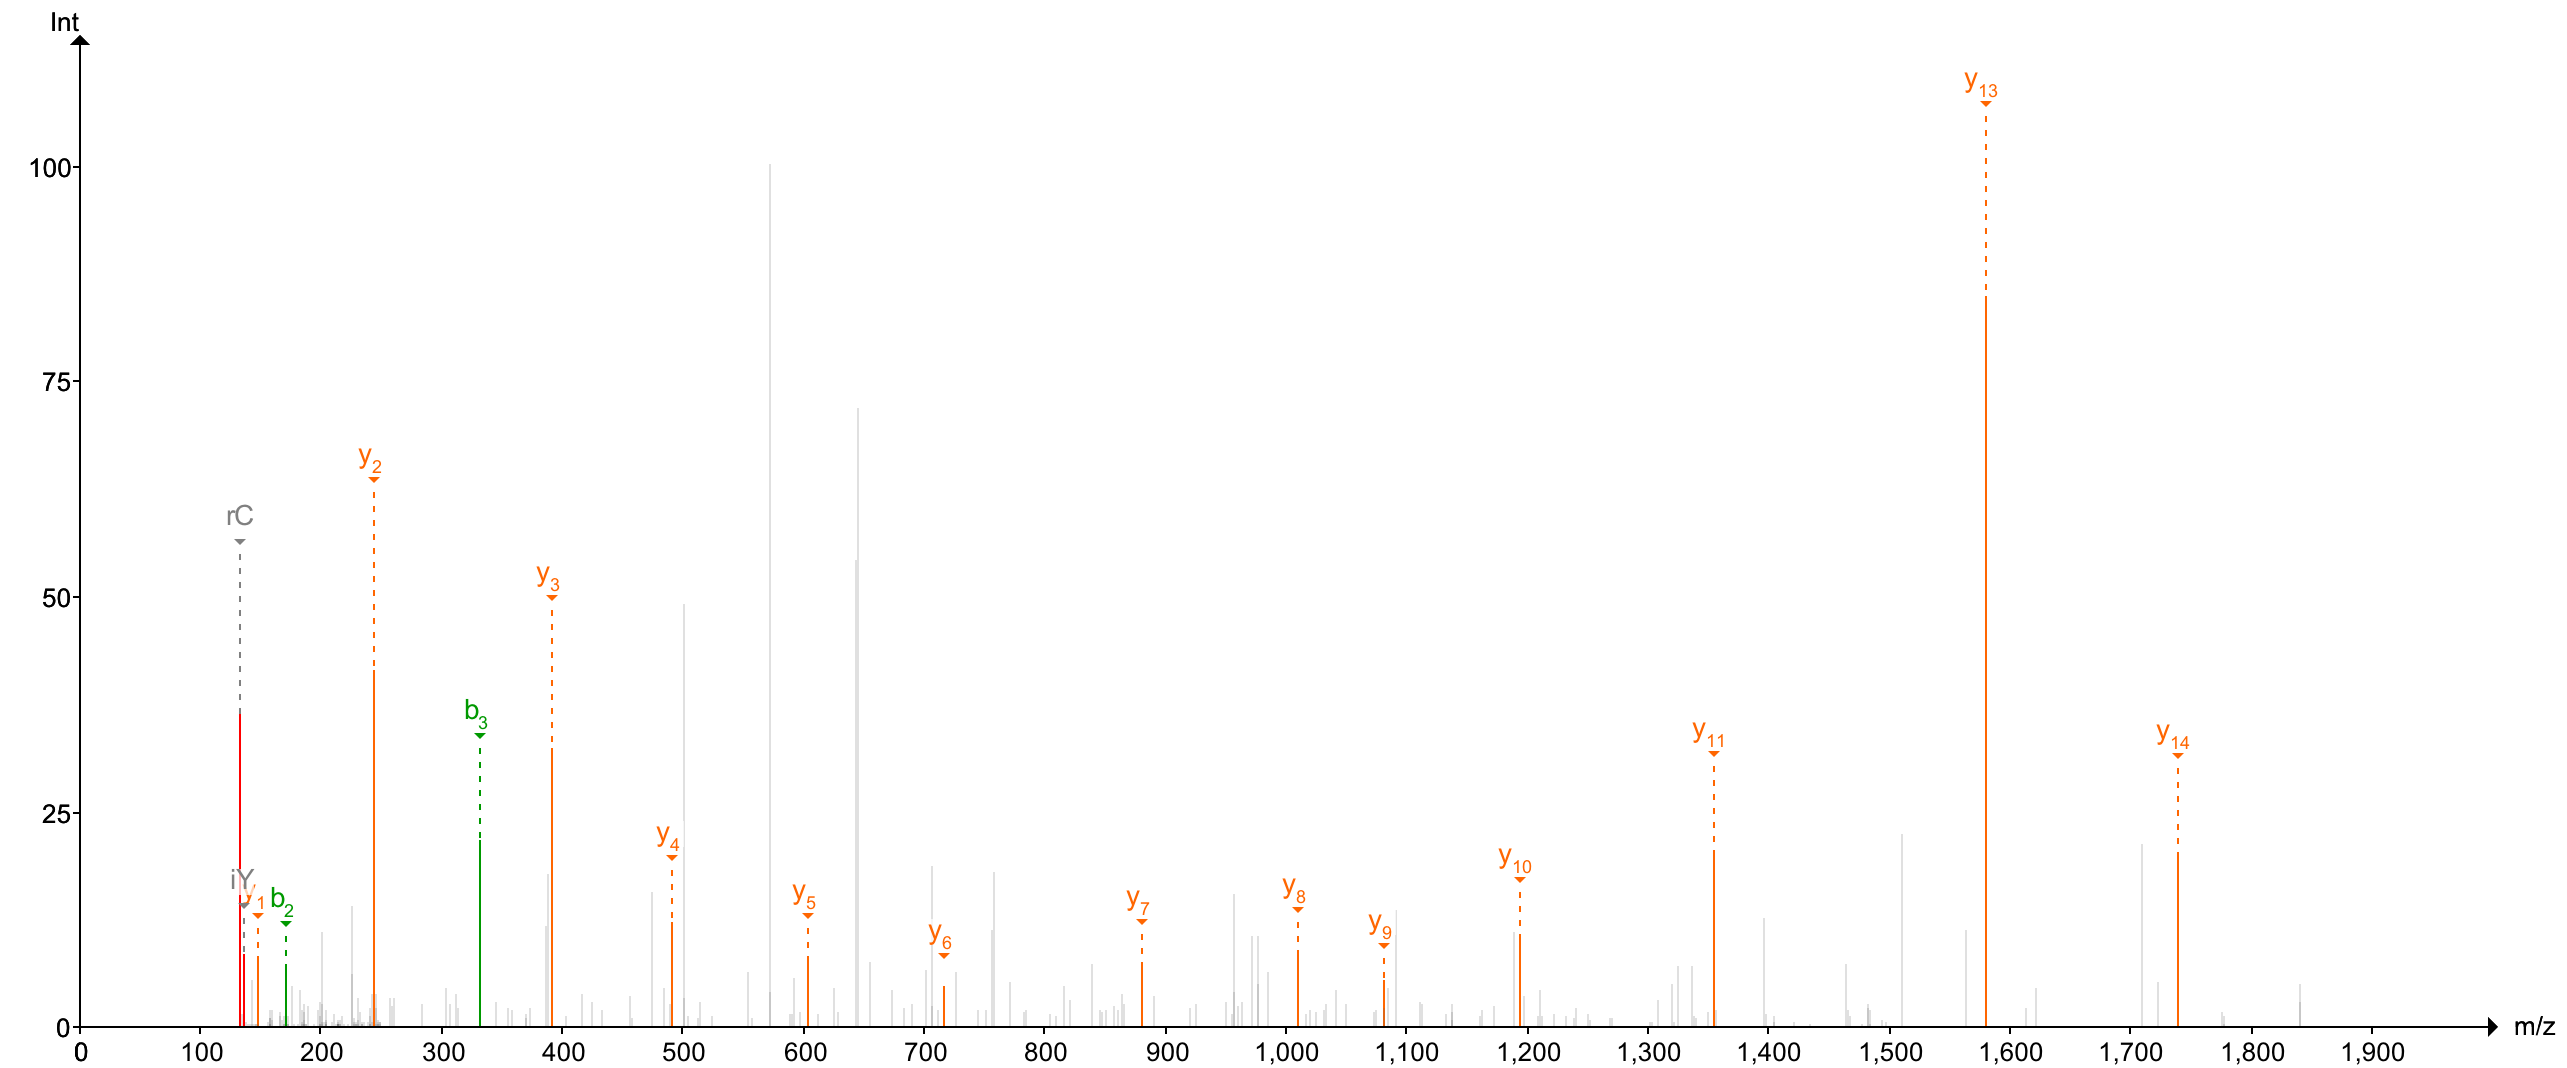

NH<sub>2</sub>-A L<sub>1</sub>T A H L<sub>1</sub>P<sub>1</sub>L<sub>1</sub>G<sub>1</sub>Q<sub>1</sub>E<sub>1</sub>V<sub>1</sub>N<sub>1</sub>L<sub>1</sub>A<sub>1</sub>Q<sub>1</sub>L<sub>1</sub>A<sub>1</sub>R-COOH

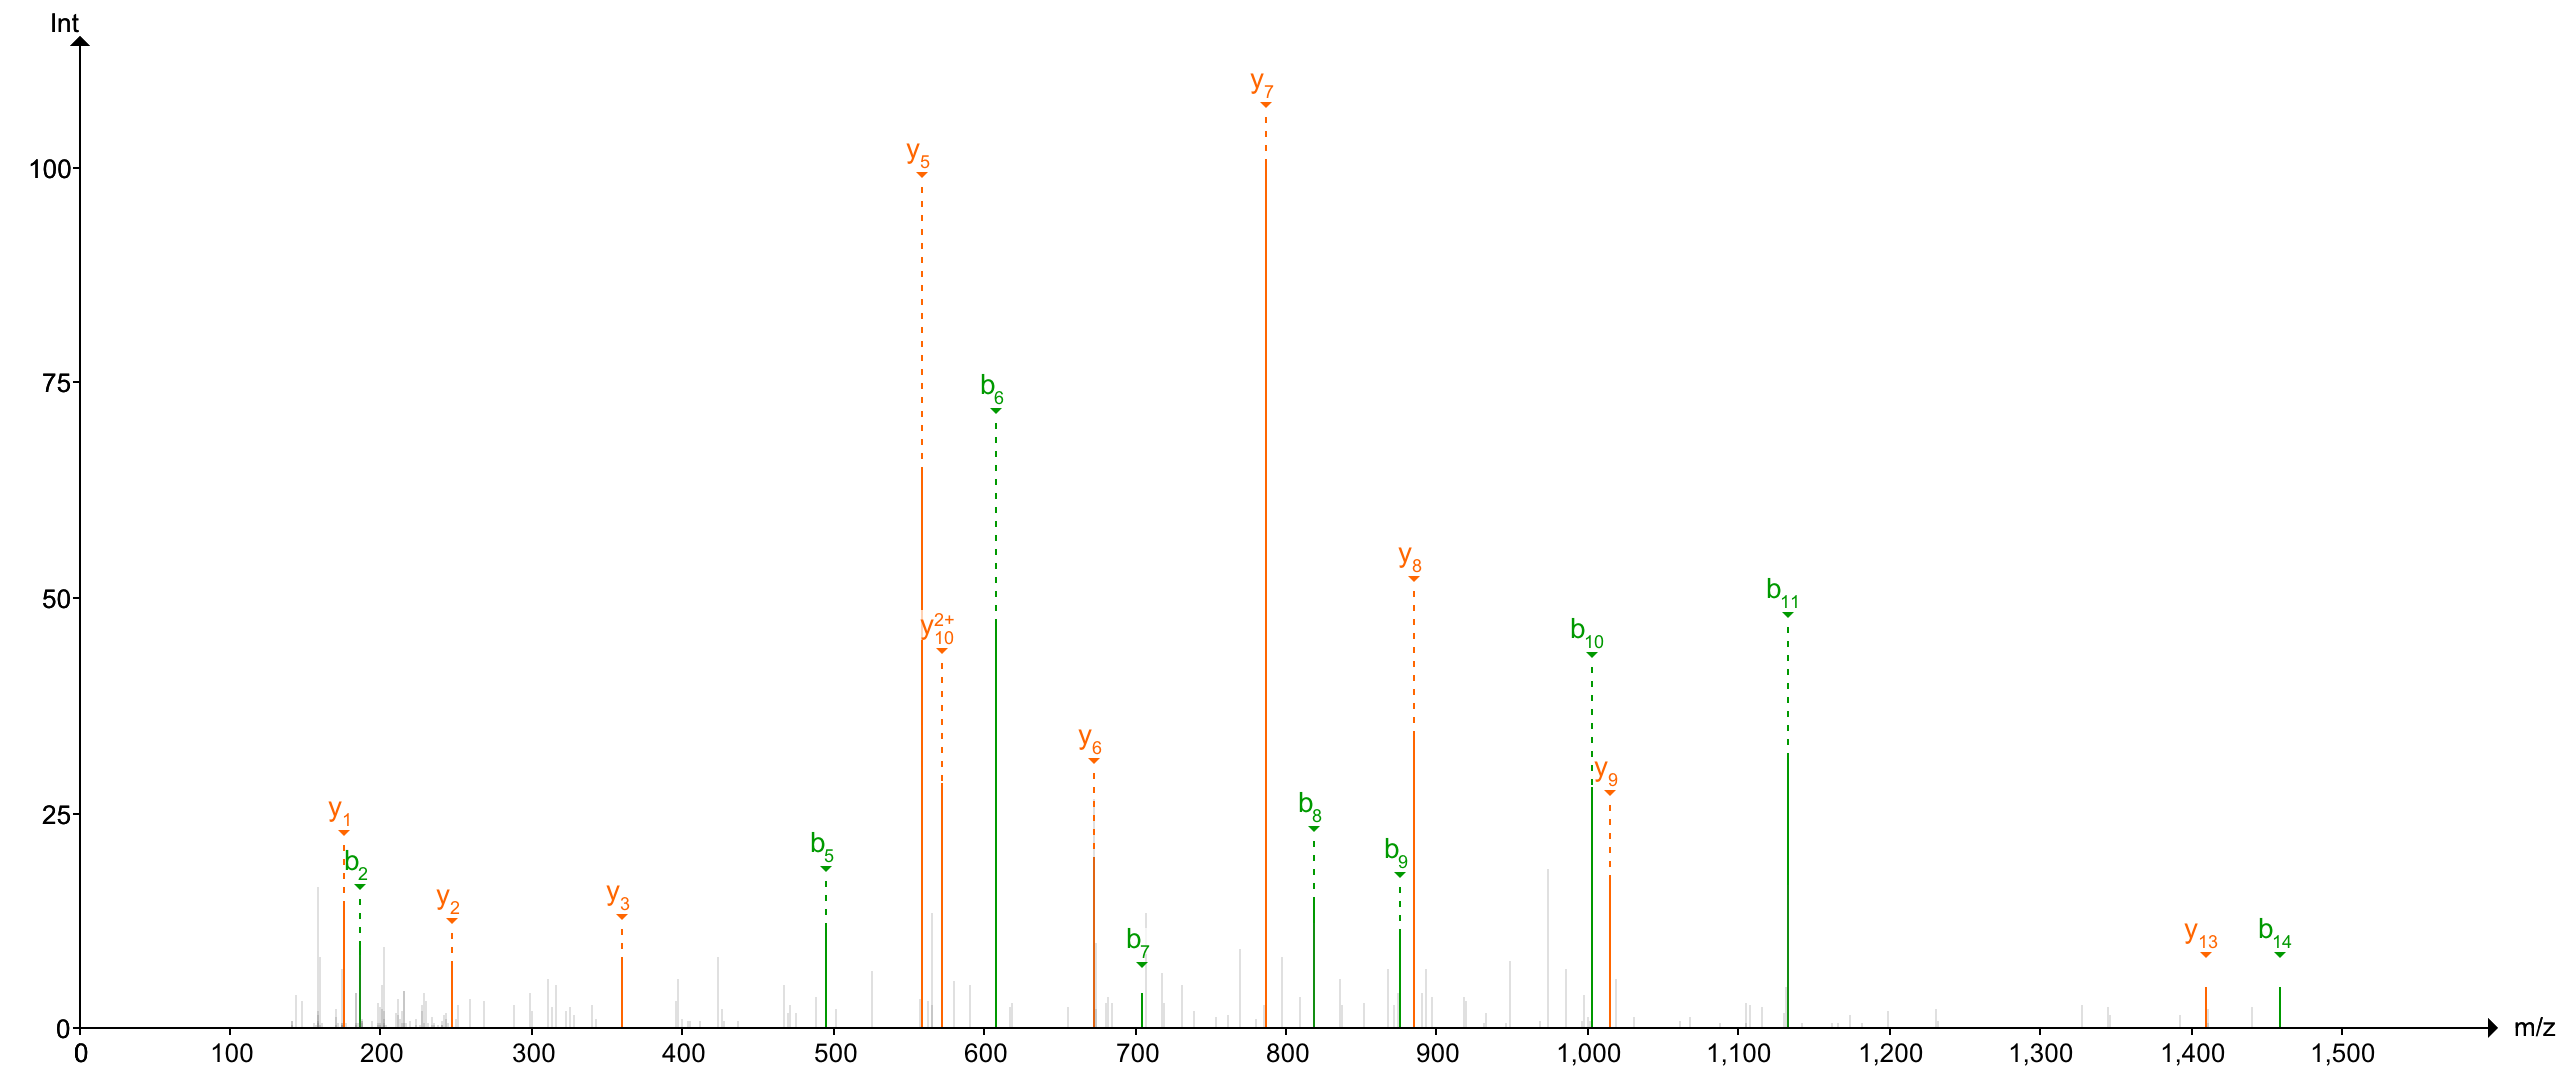

NH<sub>2</sub>-V L L G Q D E P L I H V F A K-COOH

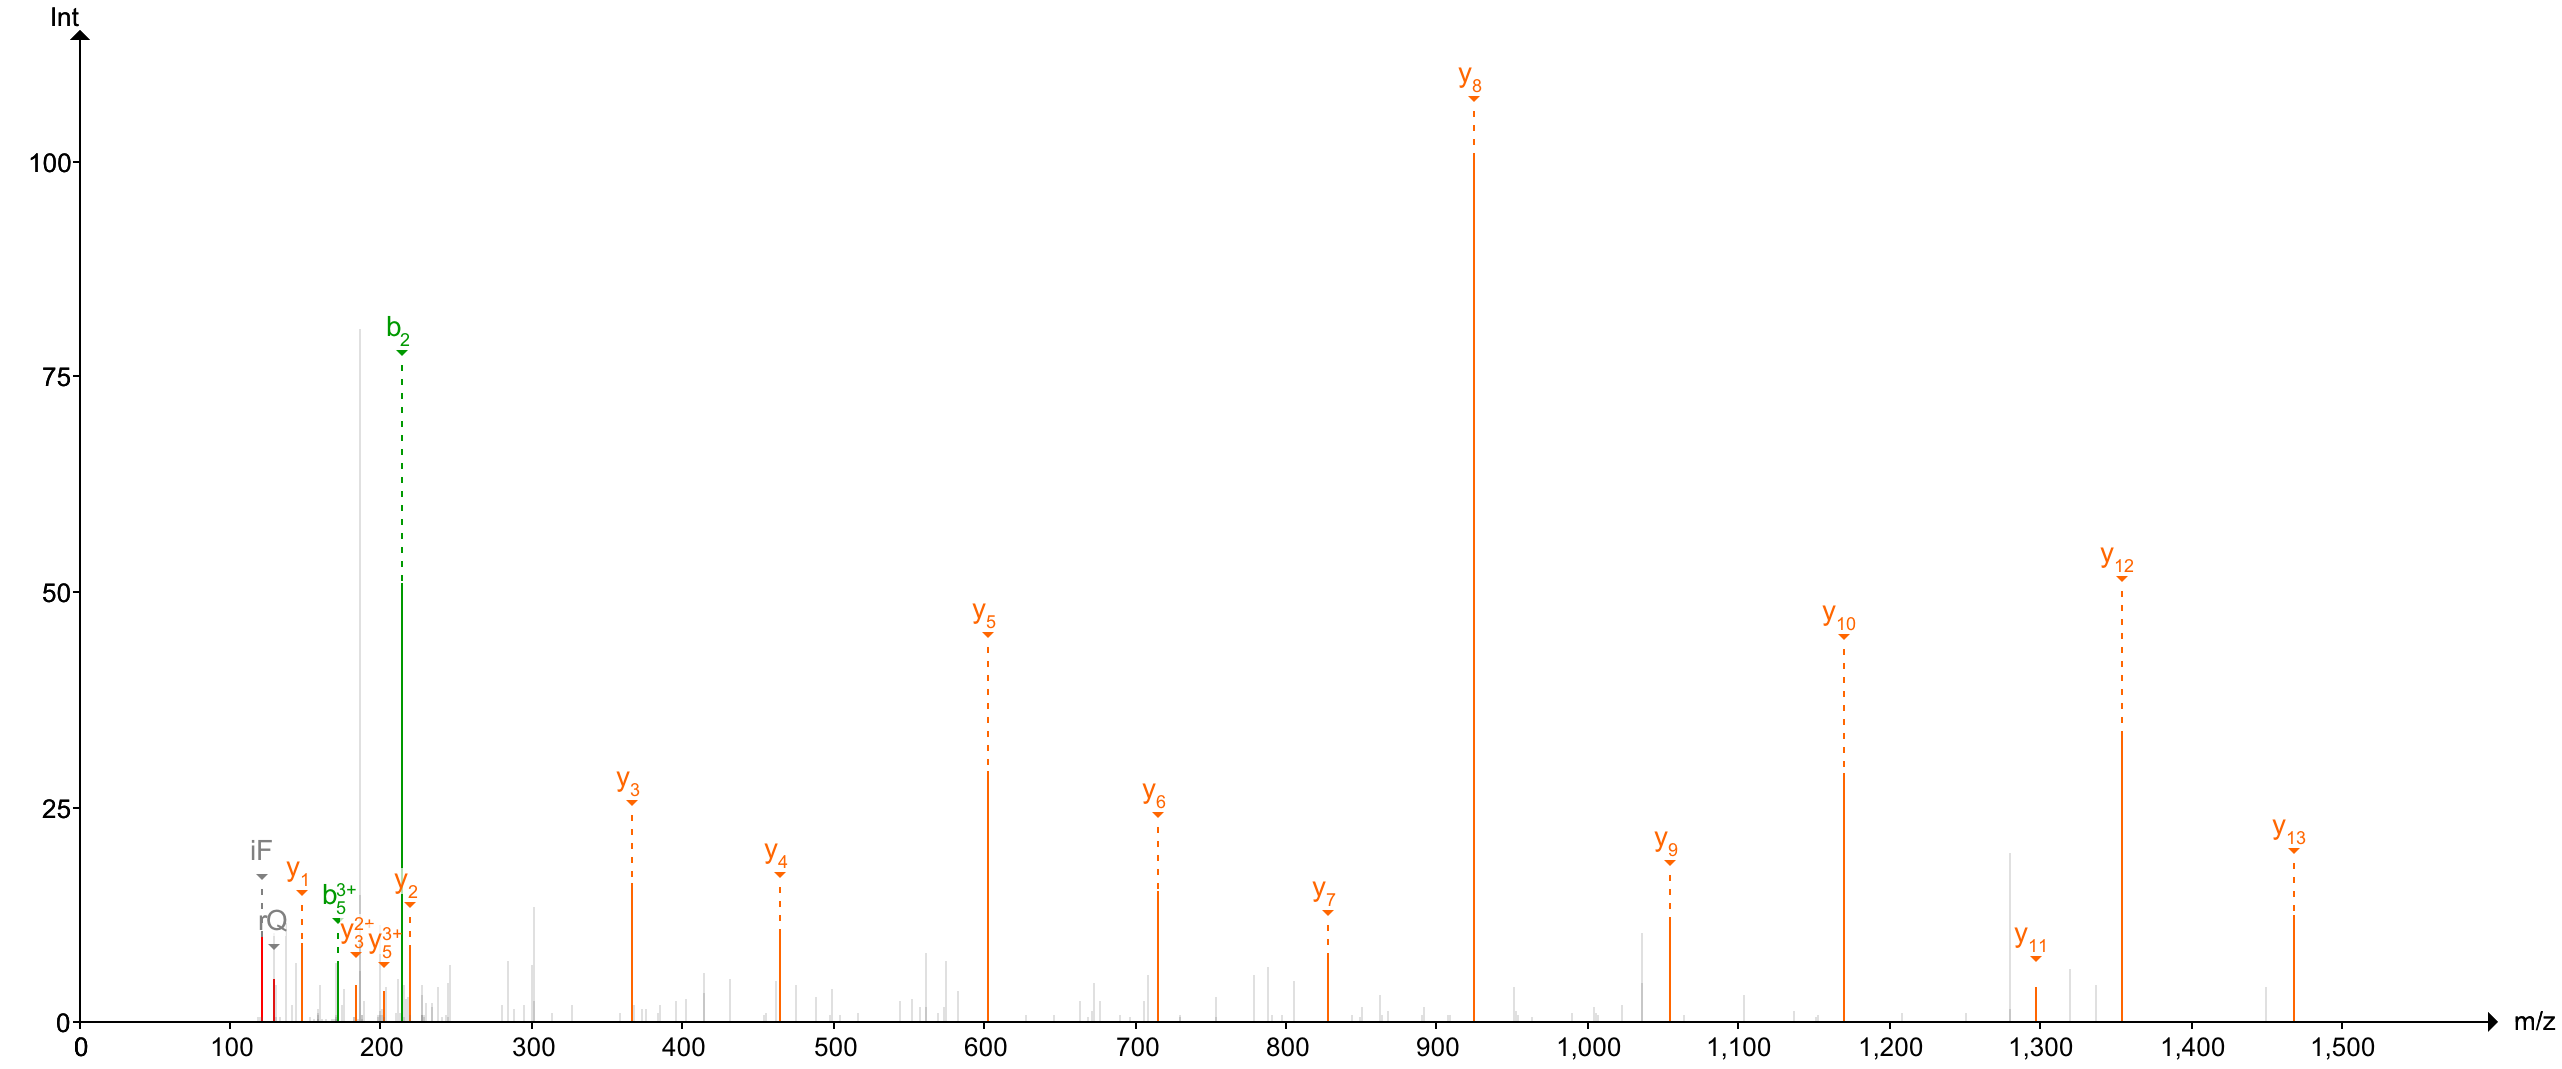

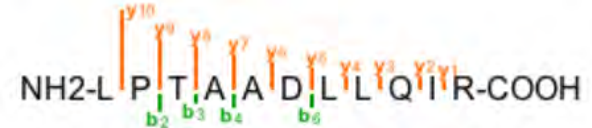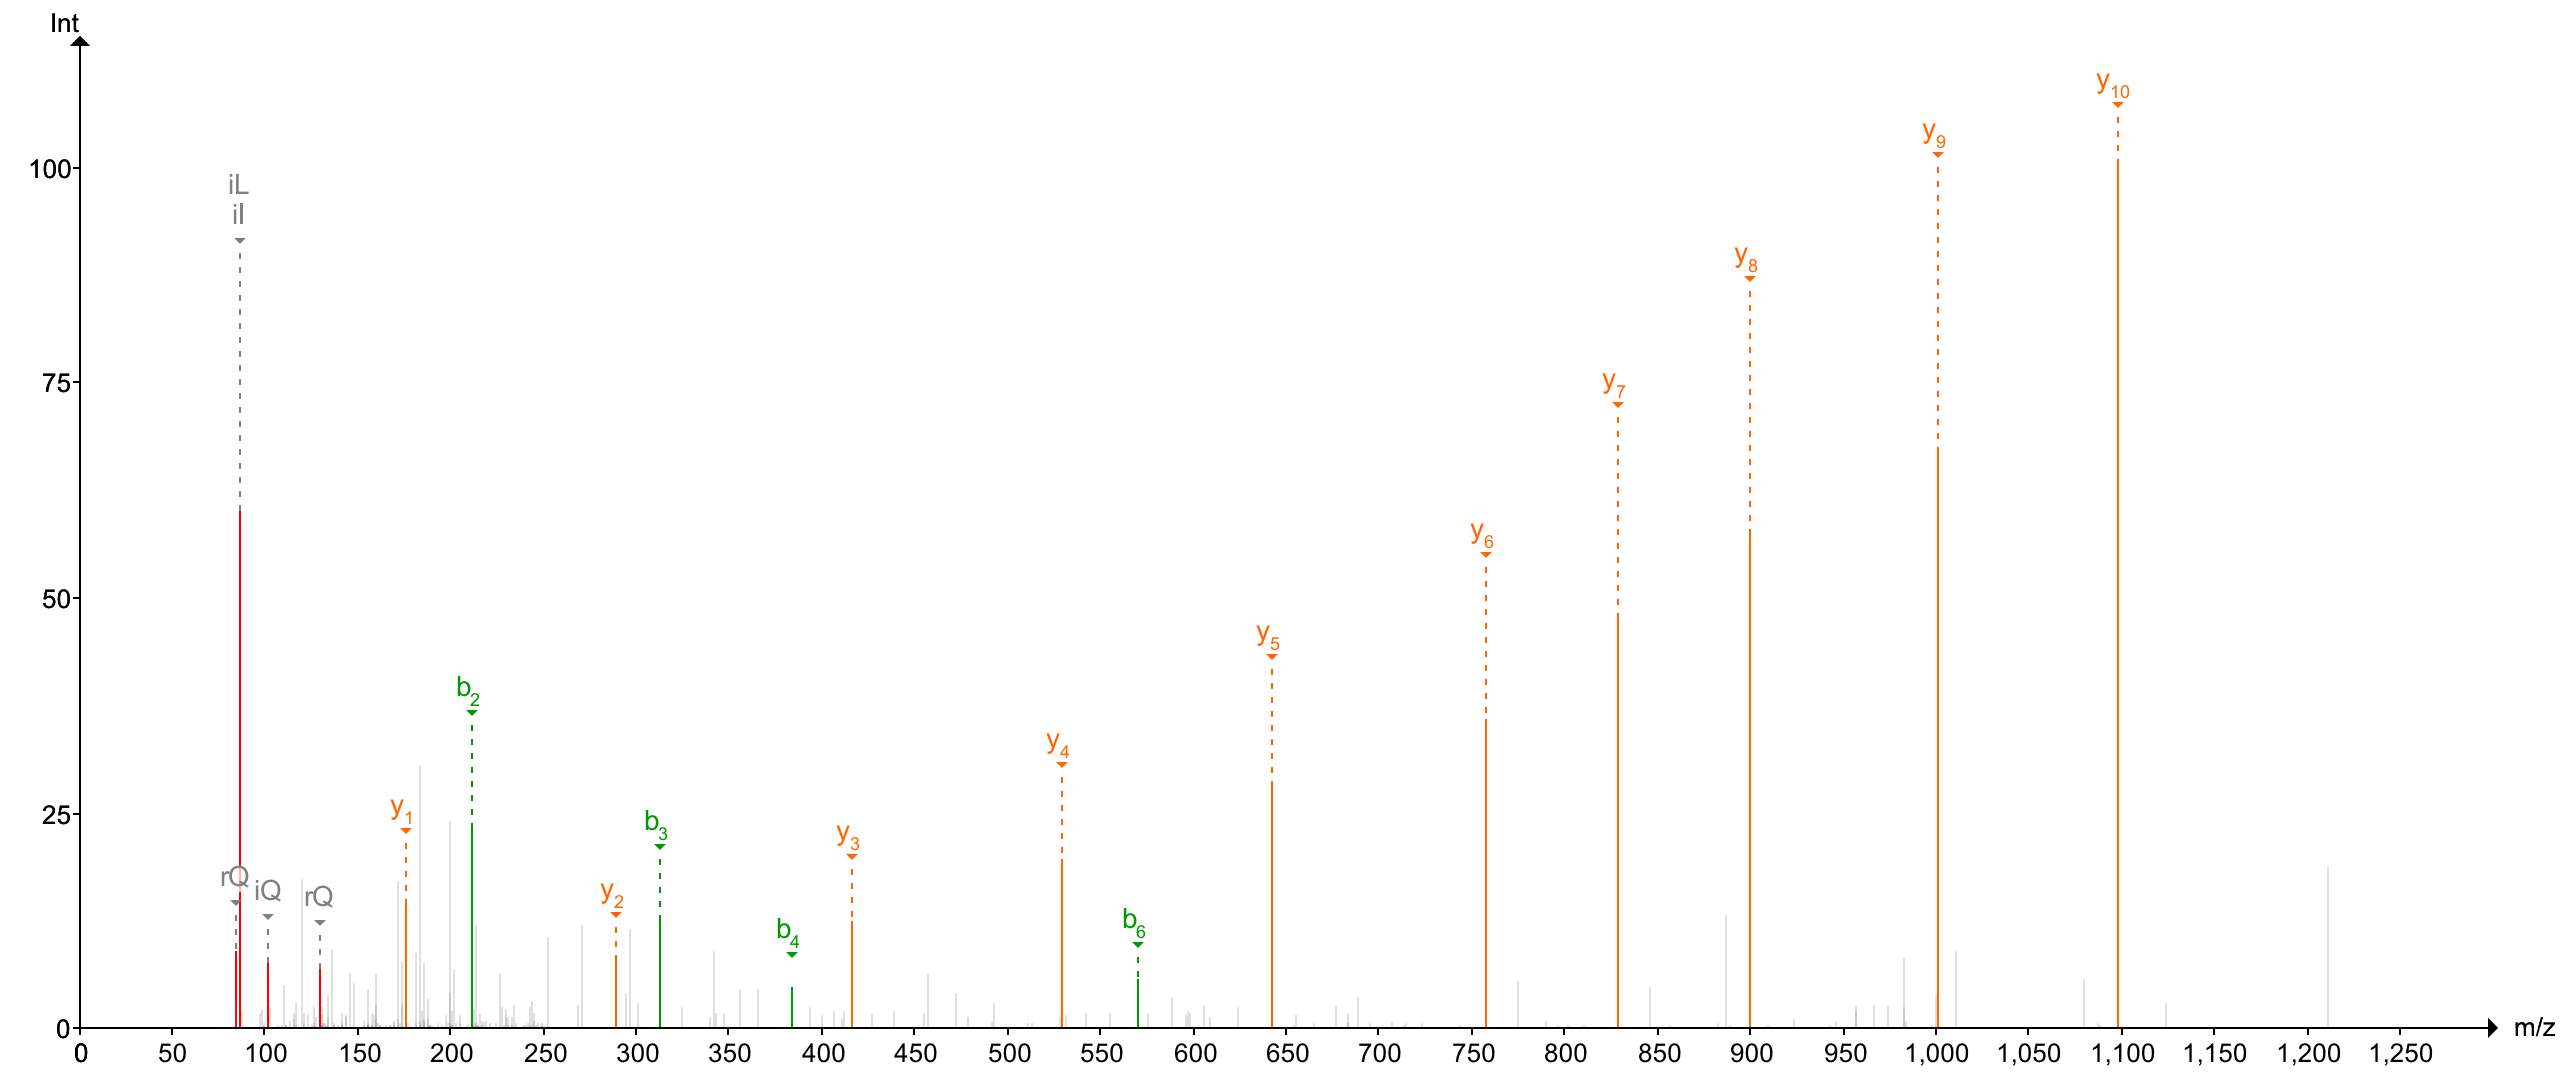



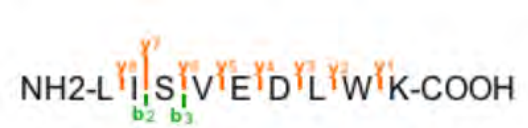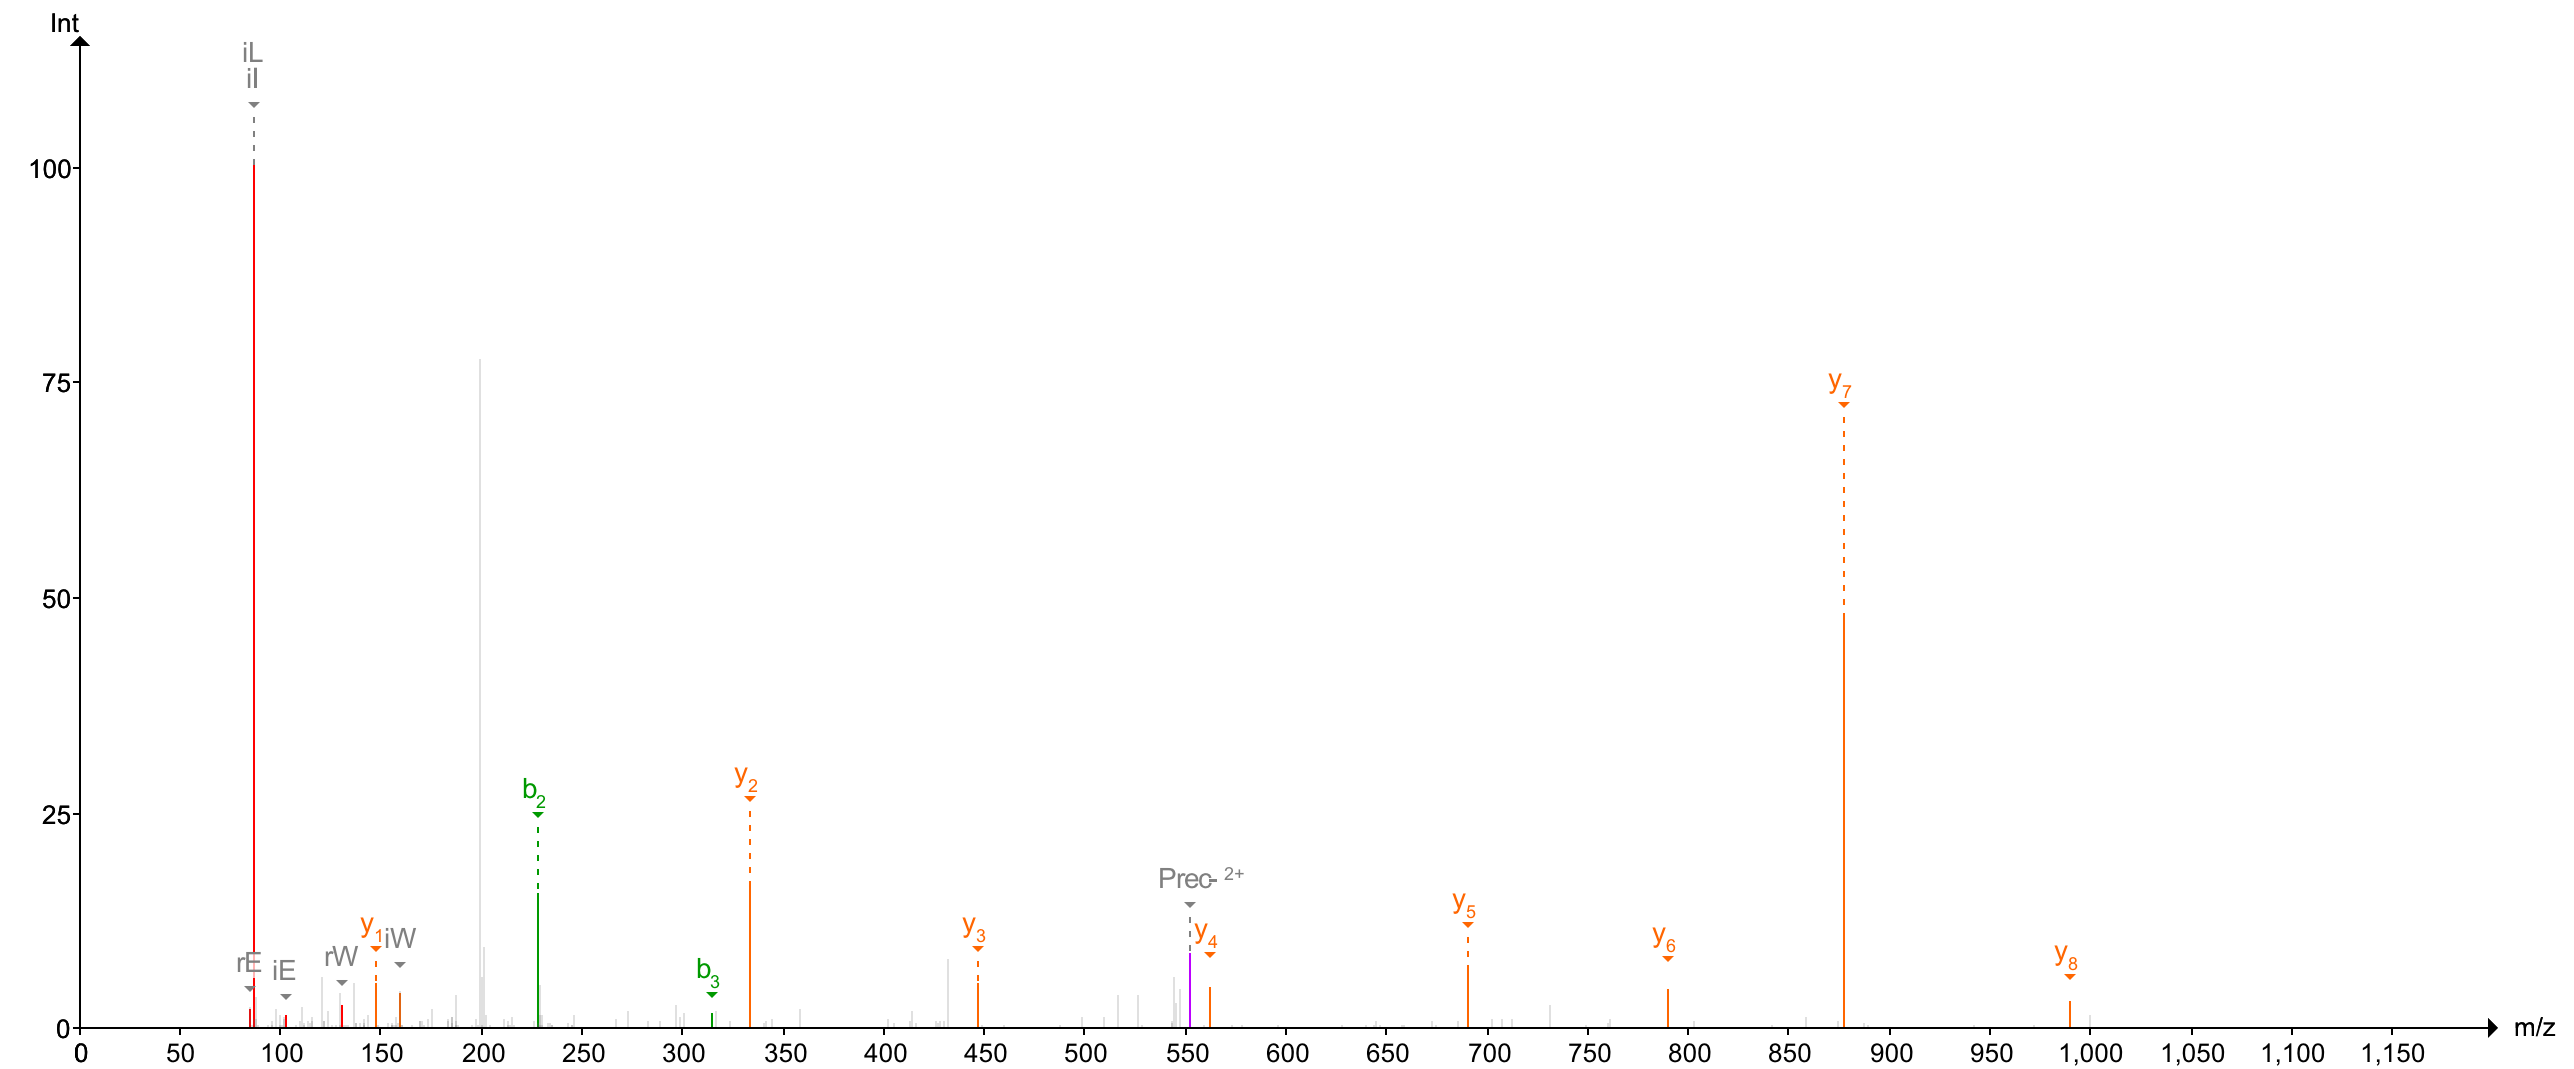

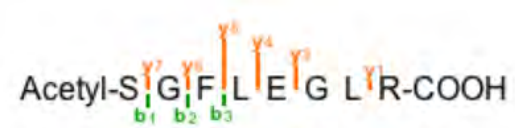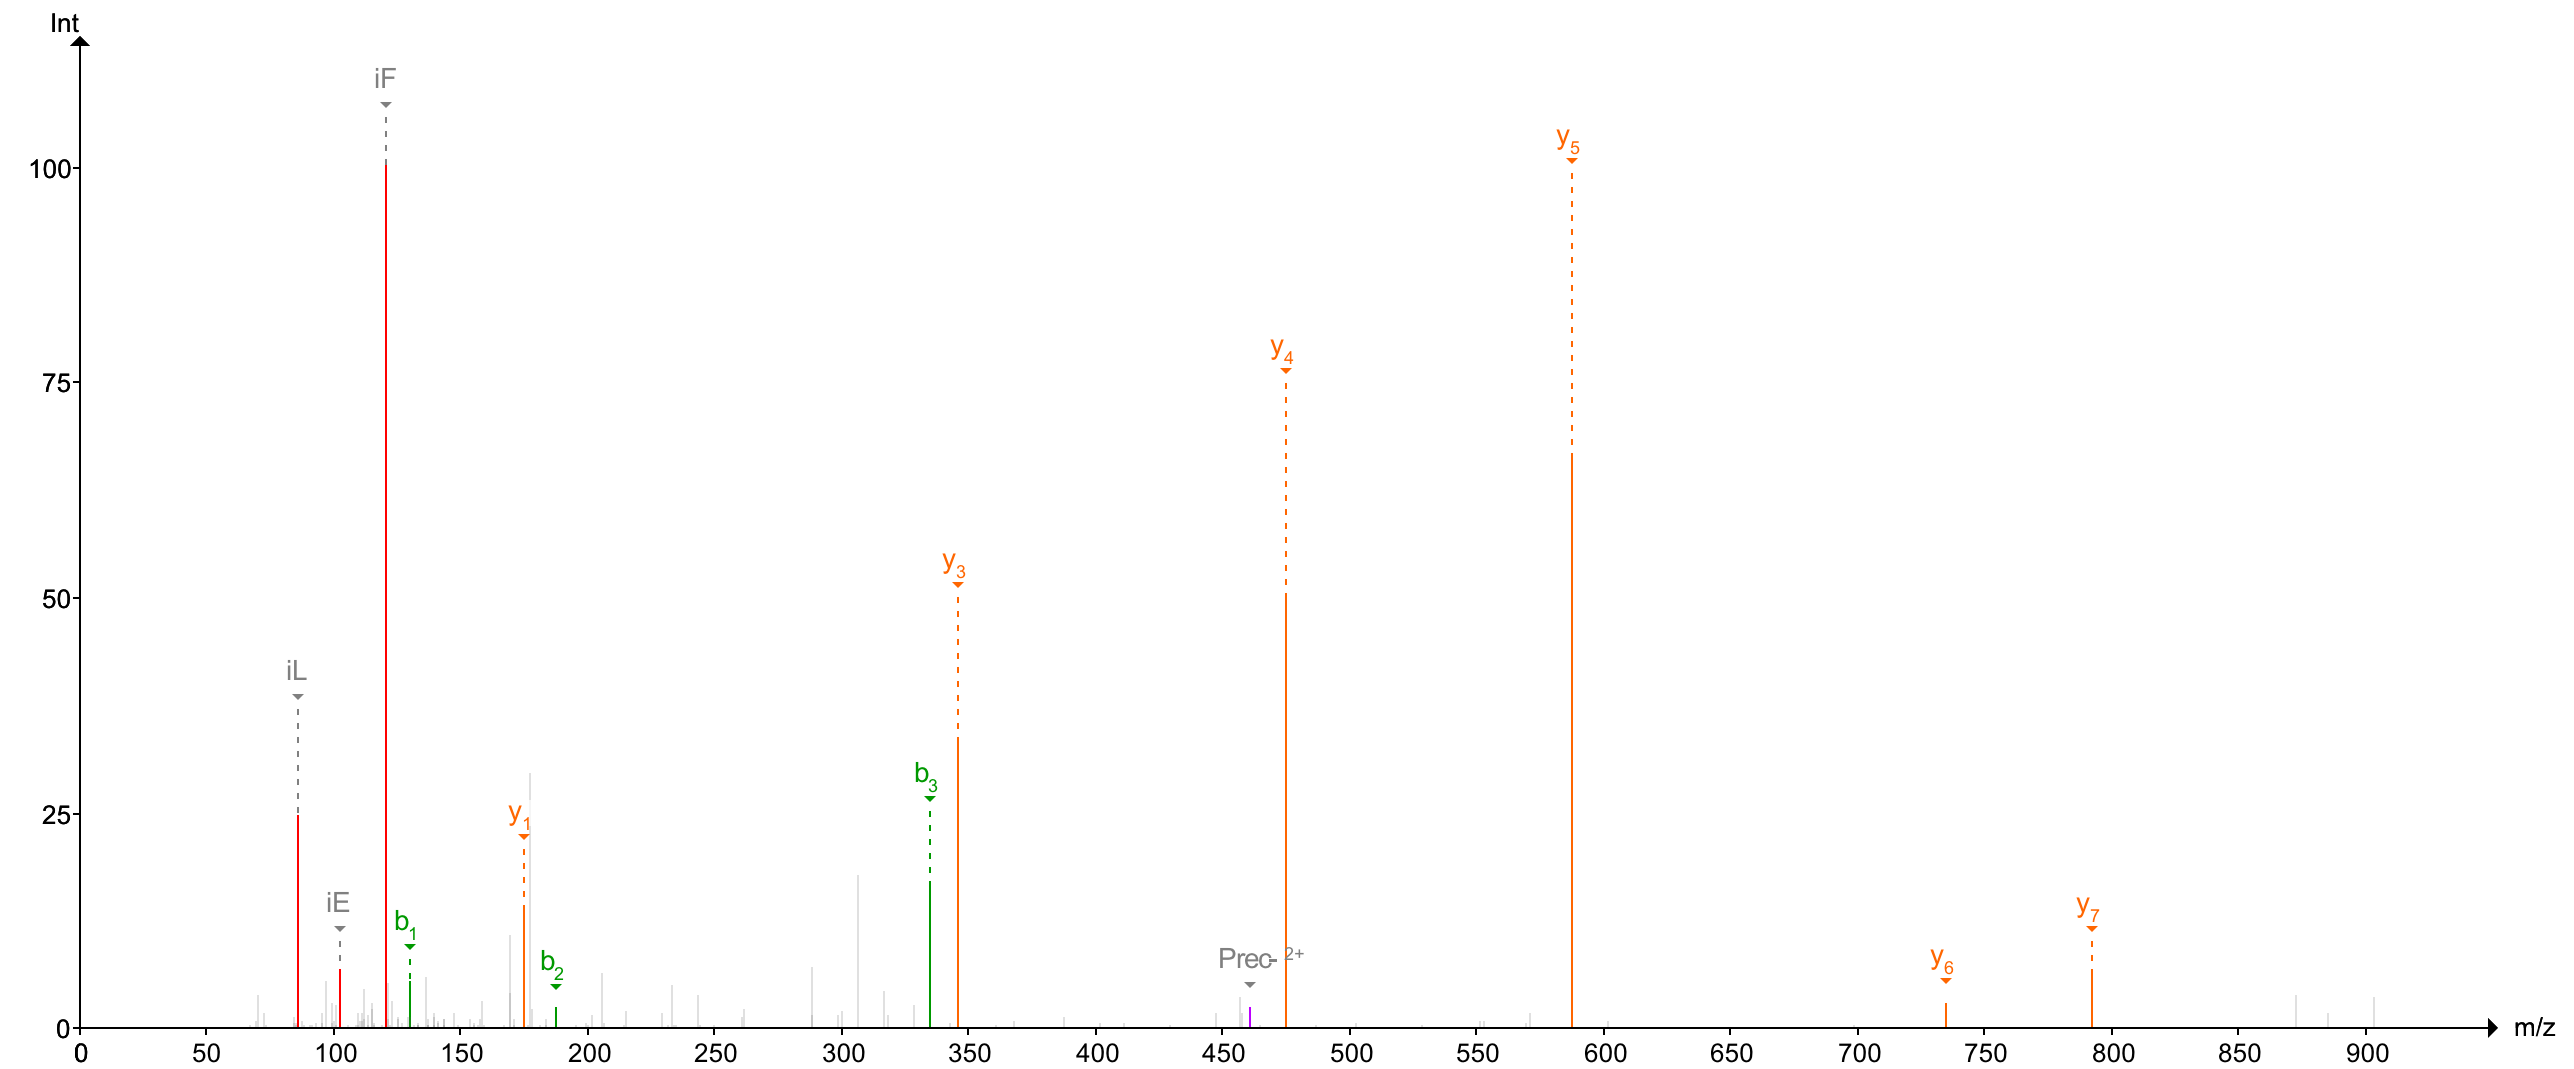

NH<sub>2</sub>-I A<sub>1</sub> A<sub>2</sub> A<sub>3</sub> G<sub>4</sub> L<sub>5</sub> D<sub>6</sub> V<sub>7</sub> T<sub>8</sub> S<sub>9</sub> P<sub>10</sub> E<sub>11</sub> P<sub>12</sub> L<sub>13</sub> P<sub>14</sub> T<sub>15</sub> N<sub>16</sub> H<sub>17</sub> P<sub>18</sub> L<sub>19</sub> L<sub>20</sub> T<sub>21</sub> L<sub>22</sub> K-COOH

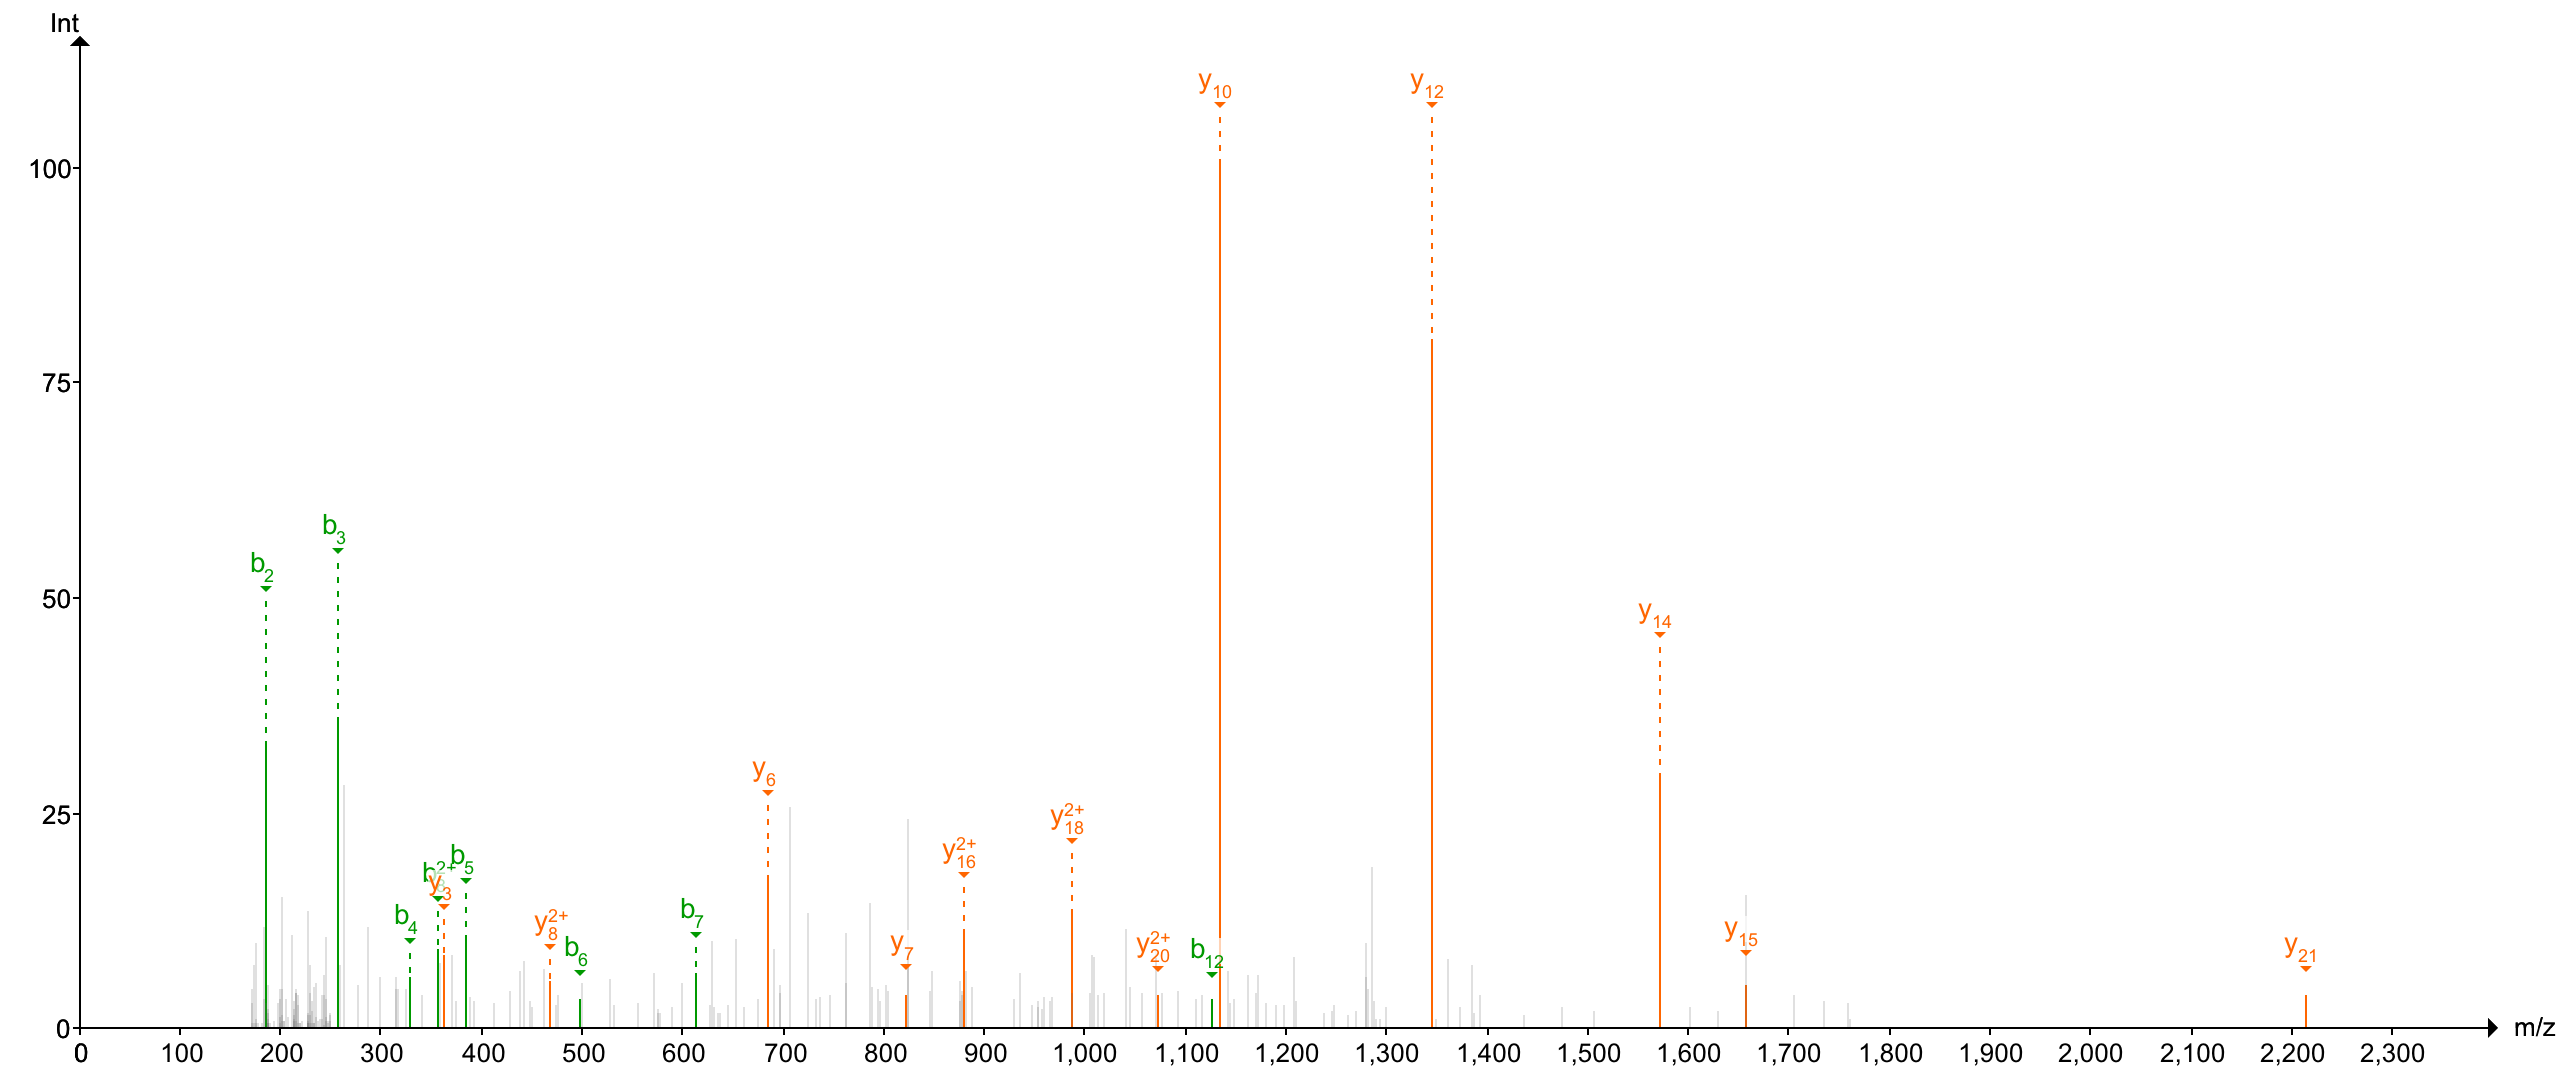

NH<sub>2</sub>-I<sup>y<sub>10</sub></sup>G<sup>y<sub>9</sub></sup>P<sup>y<sub>8</sub></sup>I<sup>y<sub>7</sub></sup>T<sup>y<sub>6</sub></sup>P<sup>y<sub>5</sub></sup>L<sup>y<sub>4</sub></sup>E<sup>y<sub>3</sub></sup>F<sup>y<sub>1</sub></sup>Y-R-COOH

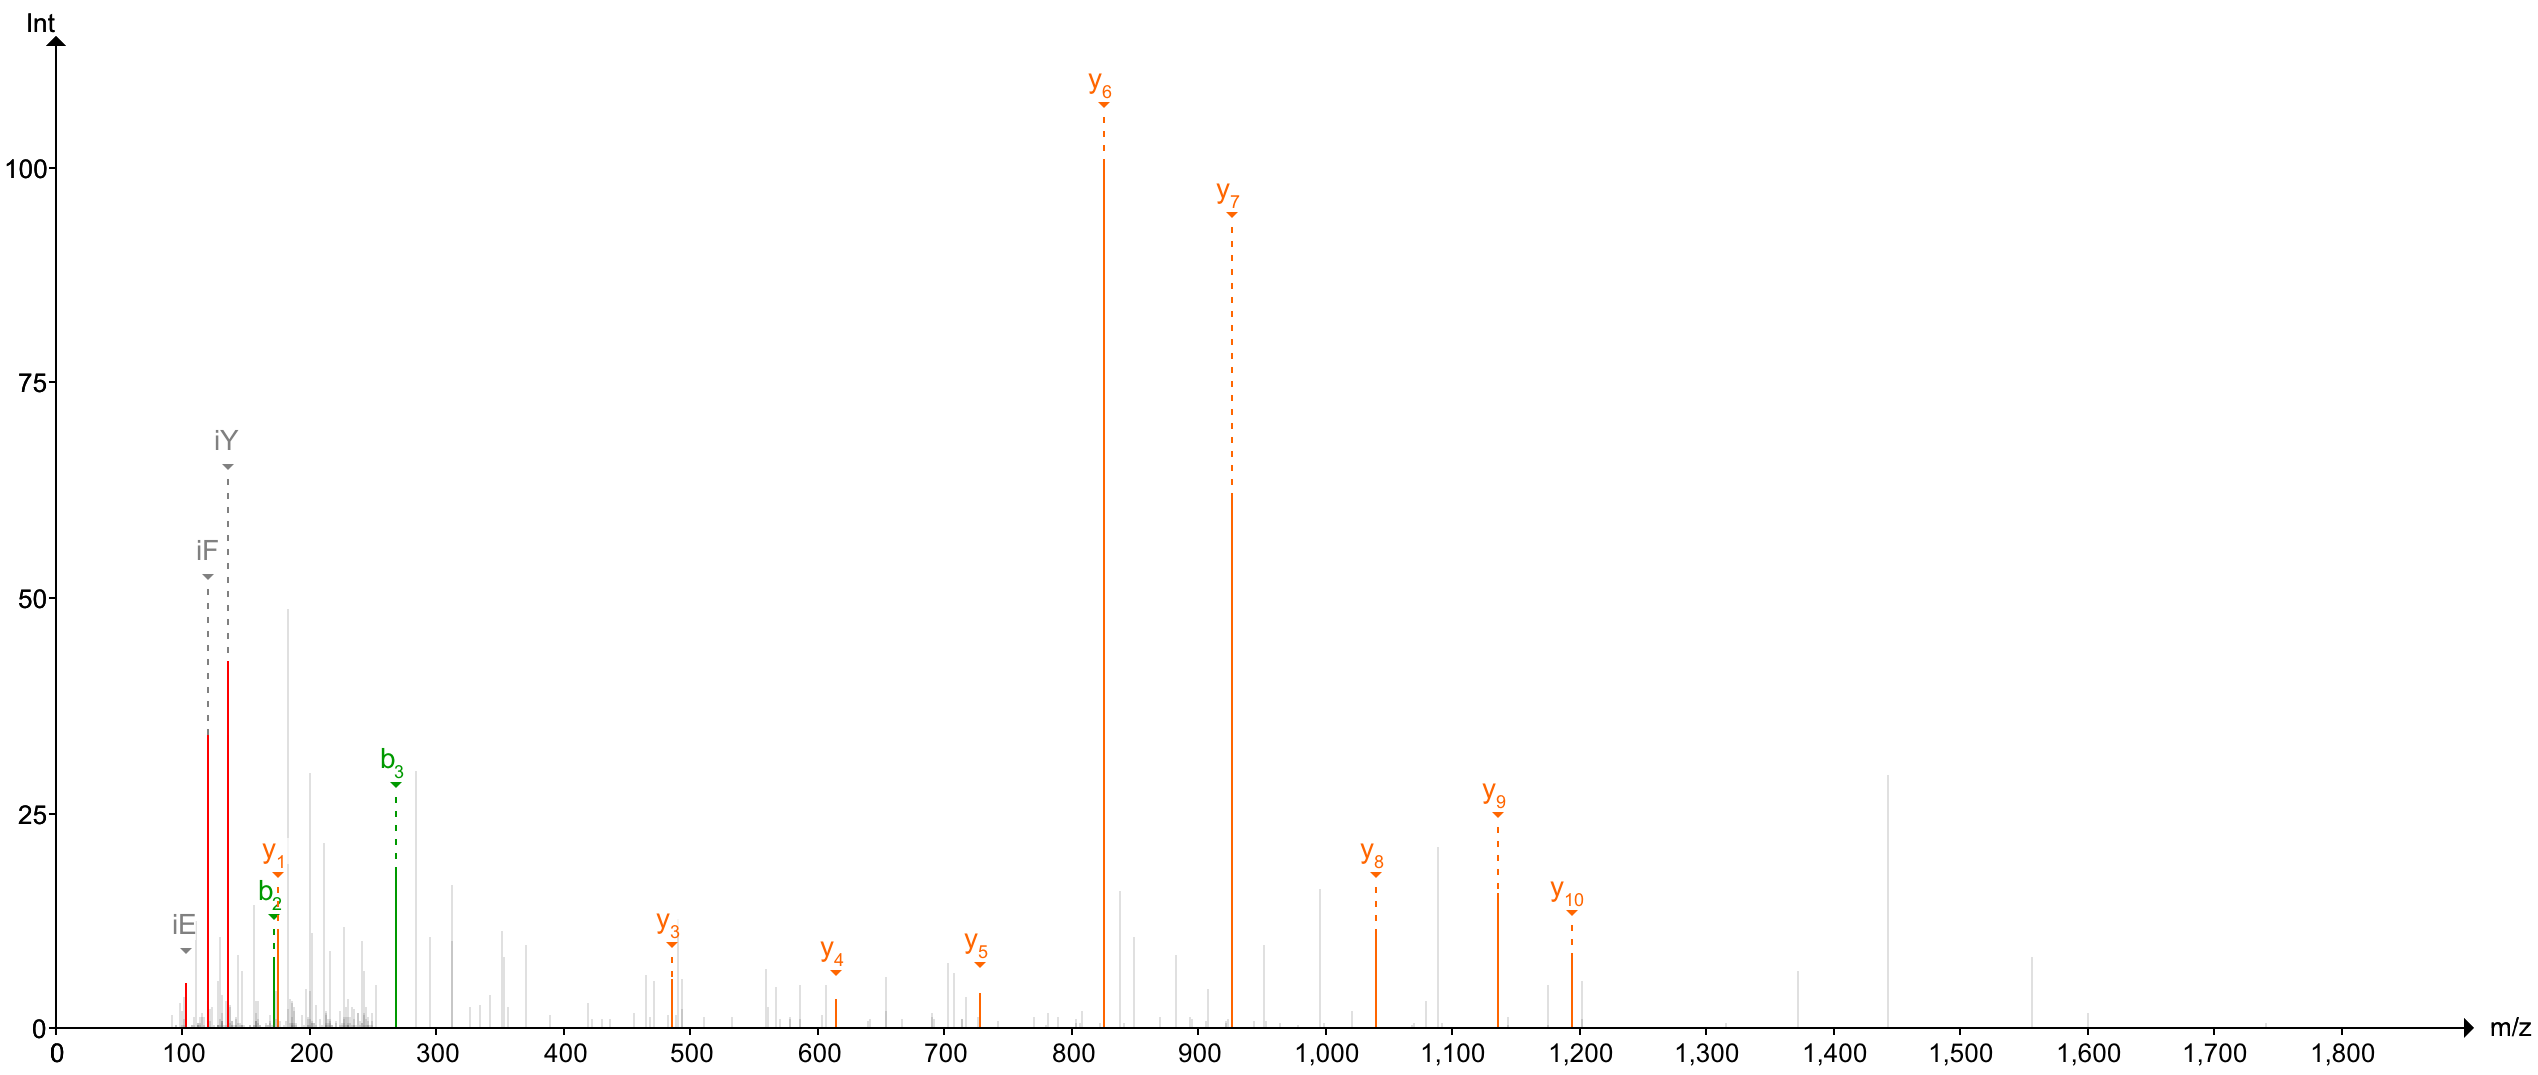

NH<sub>2</sub>-L G A L S G A A A L G F A S Y G A H G A Q F P D A Y G K-COOH

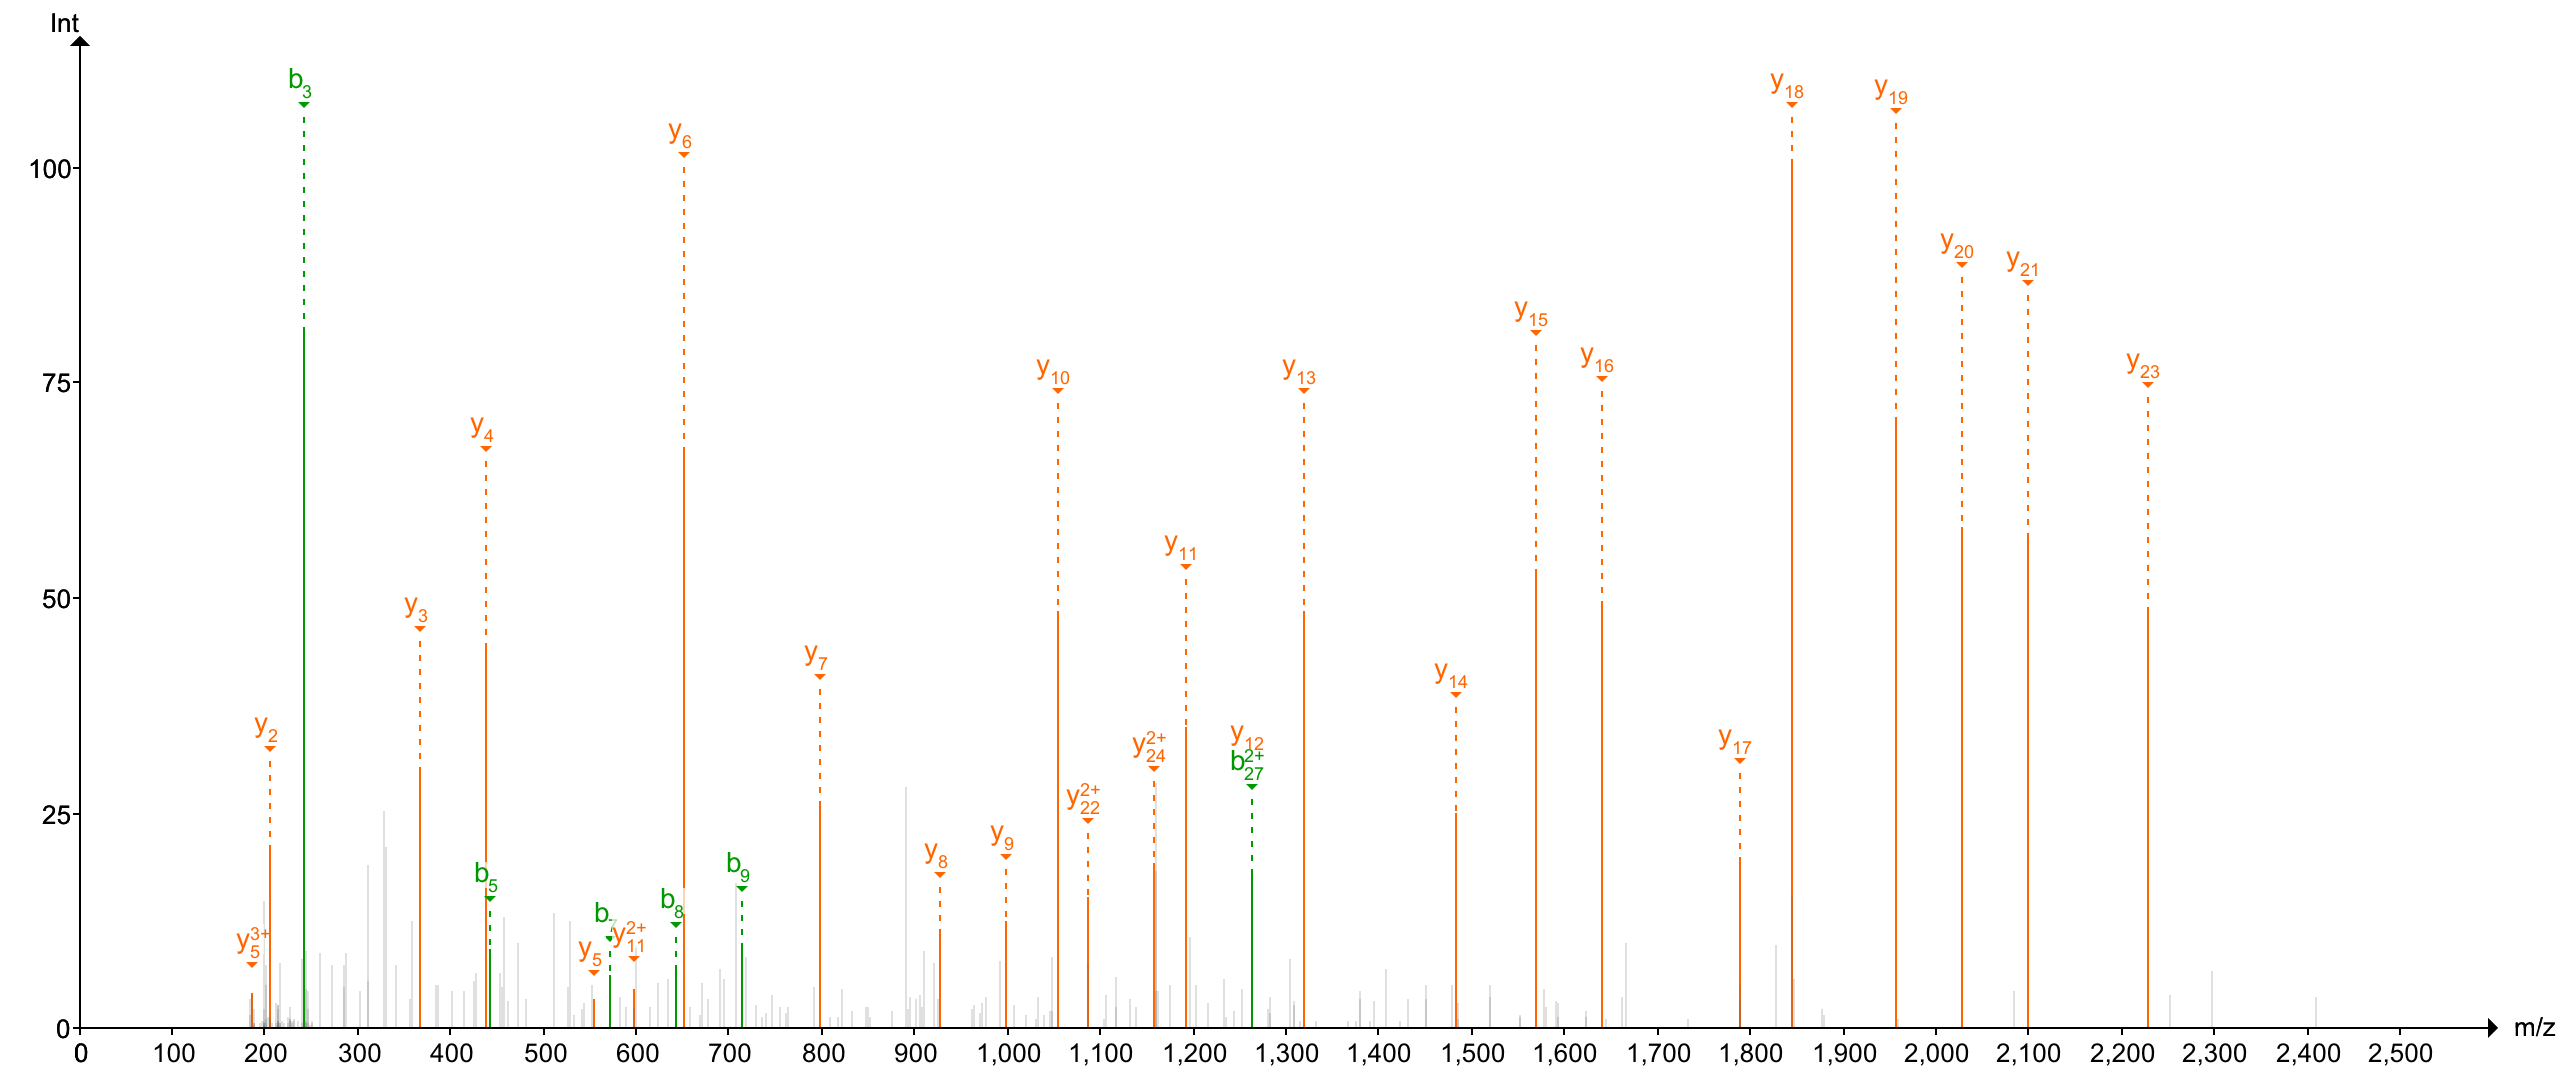

NH<sub>2</sub>-V Q<sub>1</sub>A D<sub>1</sub>V<sub>1</sub>P<sub>1</sub>P<sub>1</sub>E<sub>1</sub>I<sub>1</sub>L<sub>1</sub>N<sub>1</sub>N<sub>1</sub>V<sub>1</sub>G<sub>1</sub>A<sub>1</sub>L<sub>1</sub>H<sub>1</sub>F<sub>1</sub>R-COOH

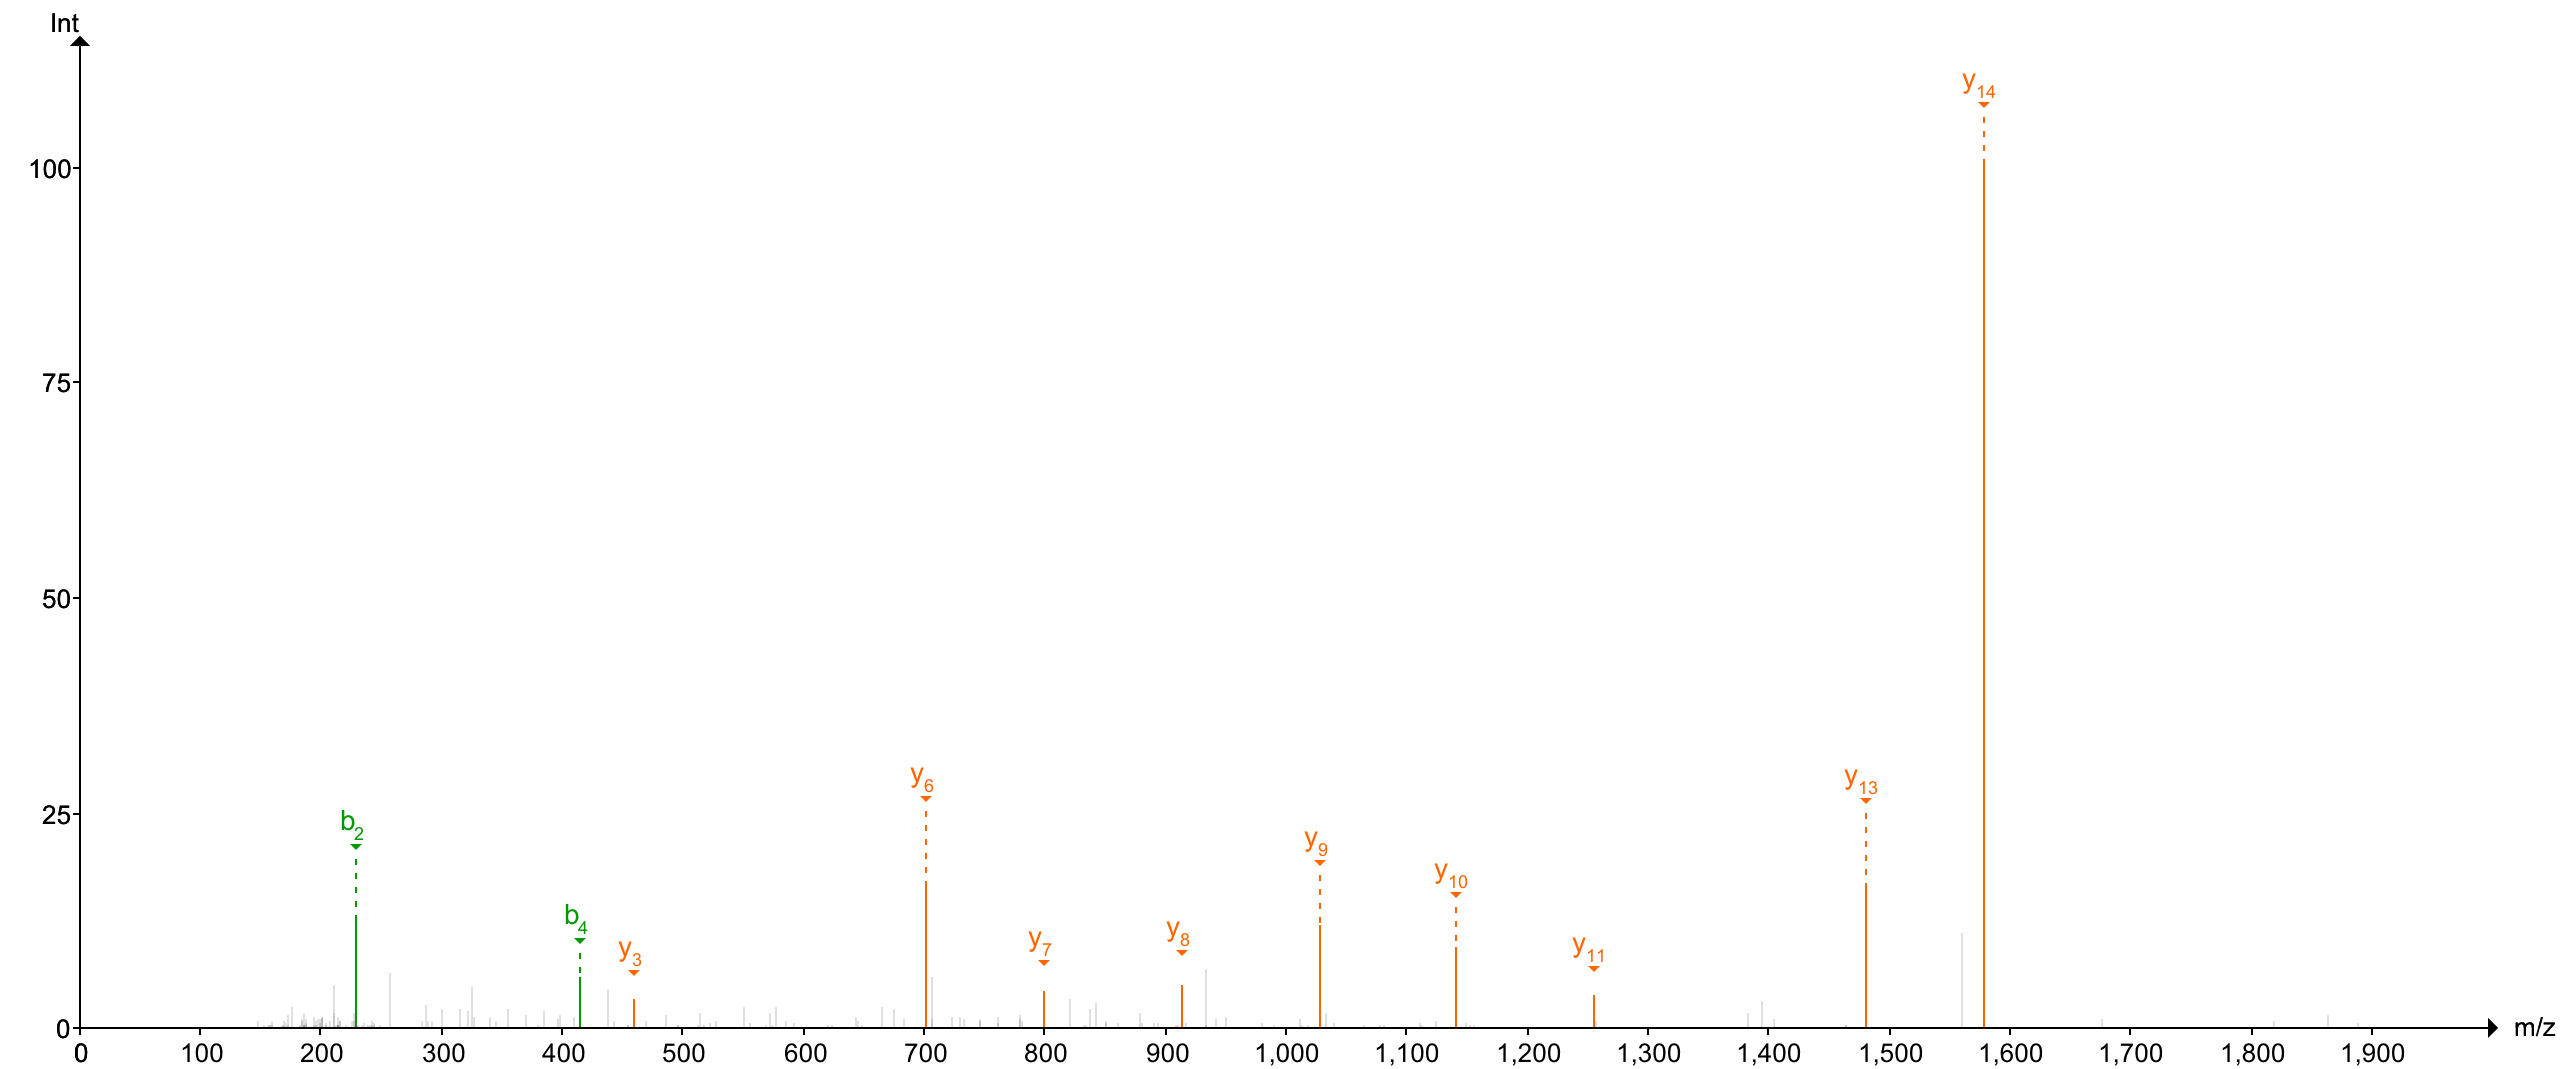

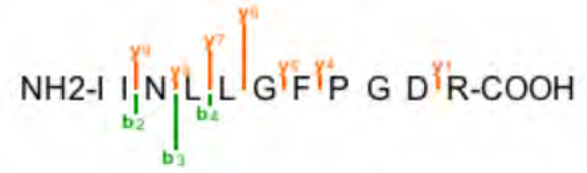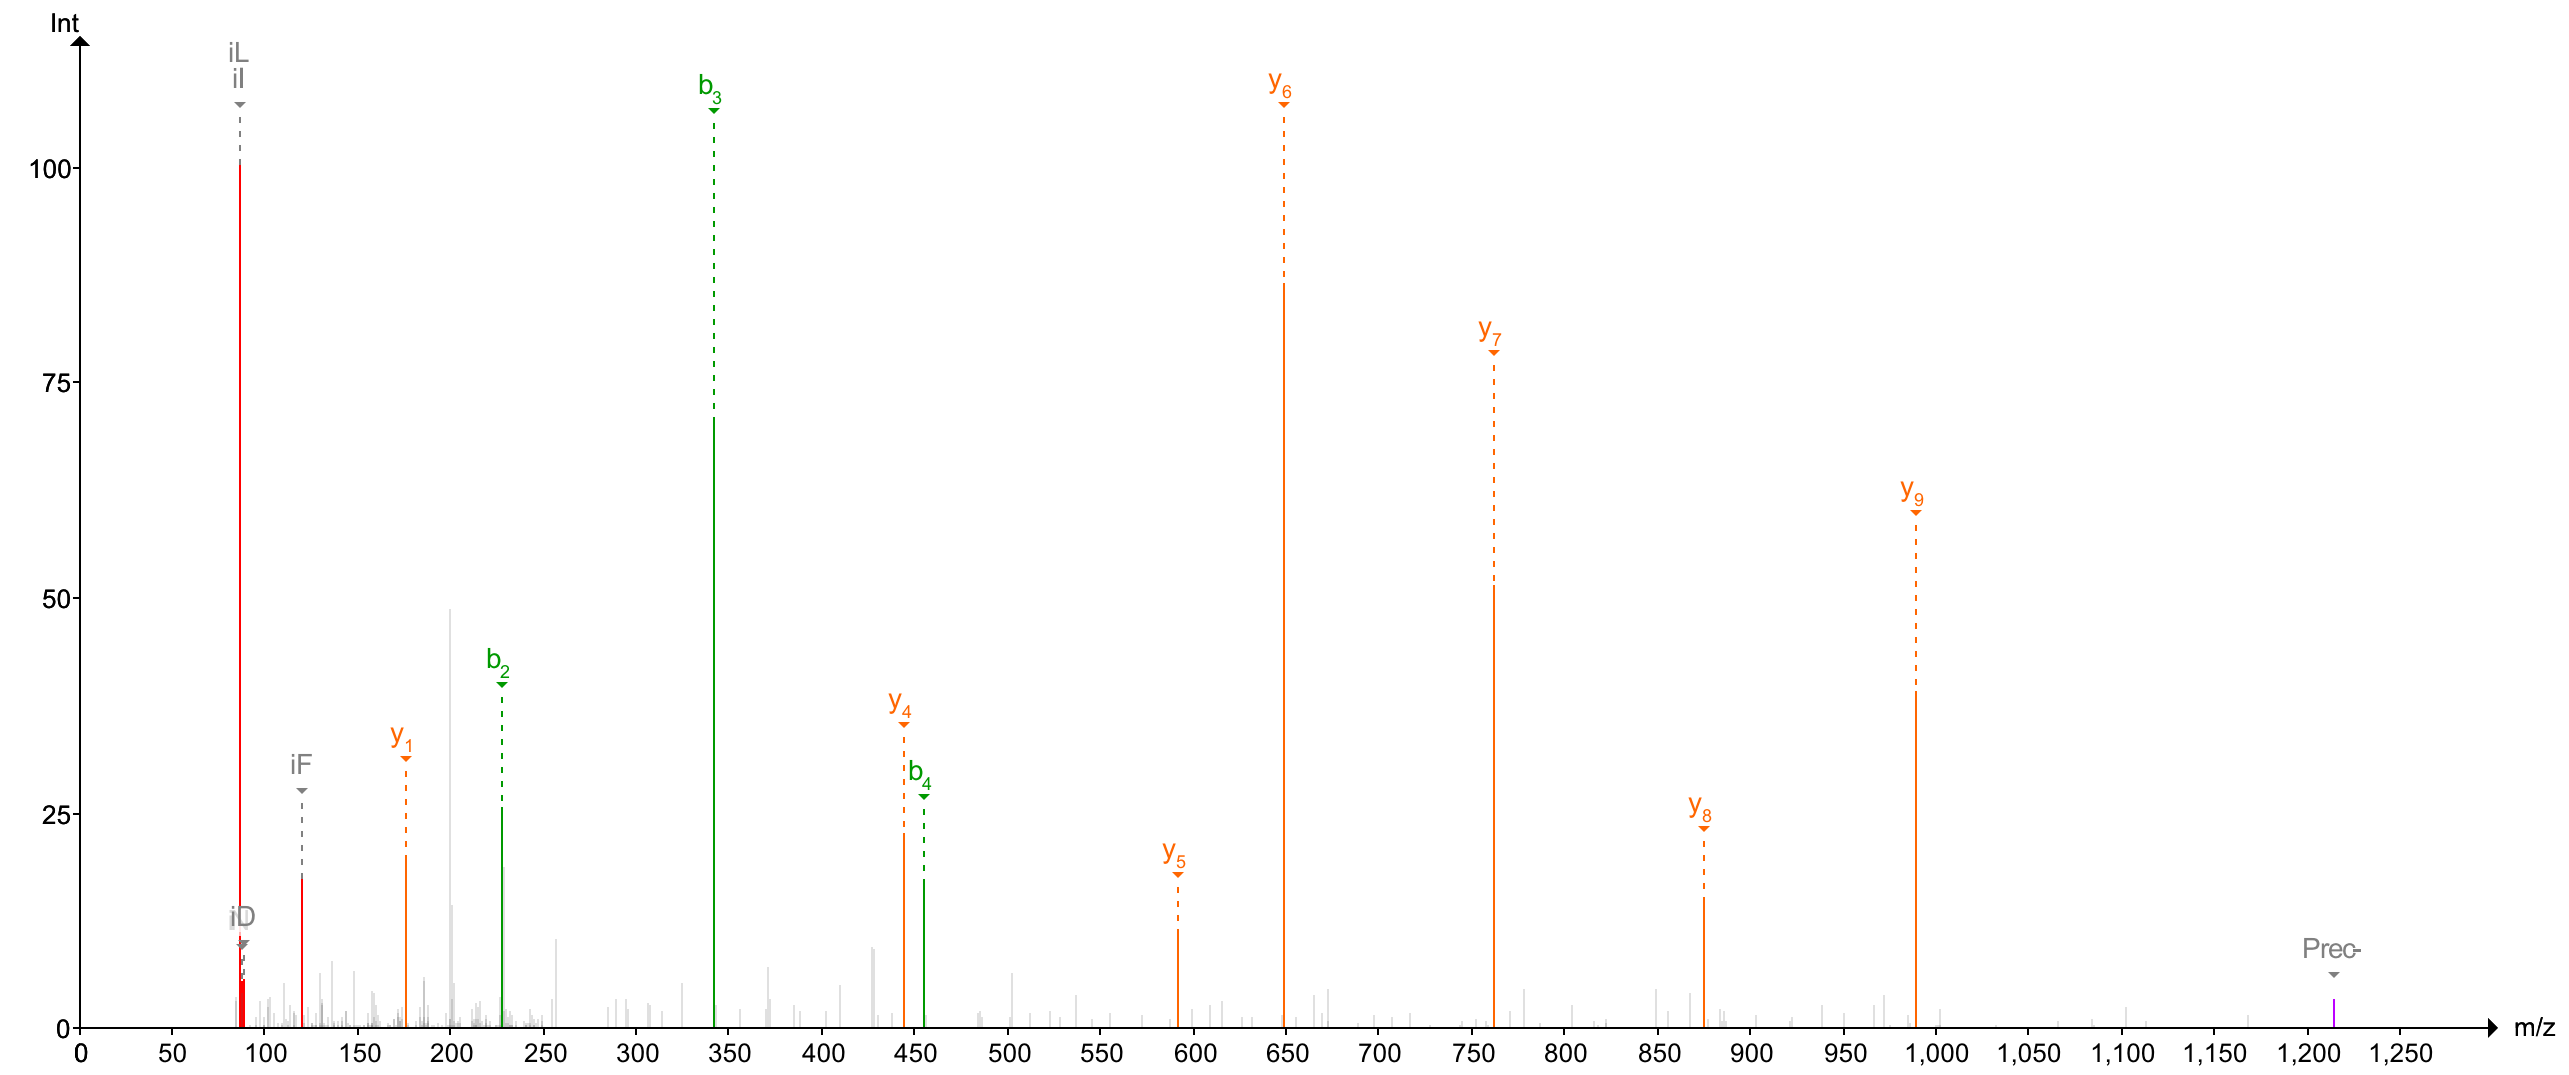

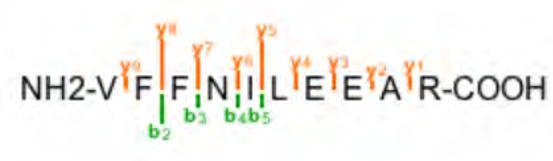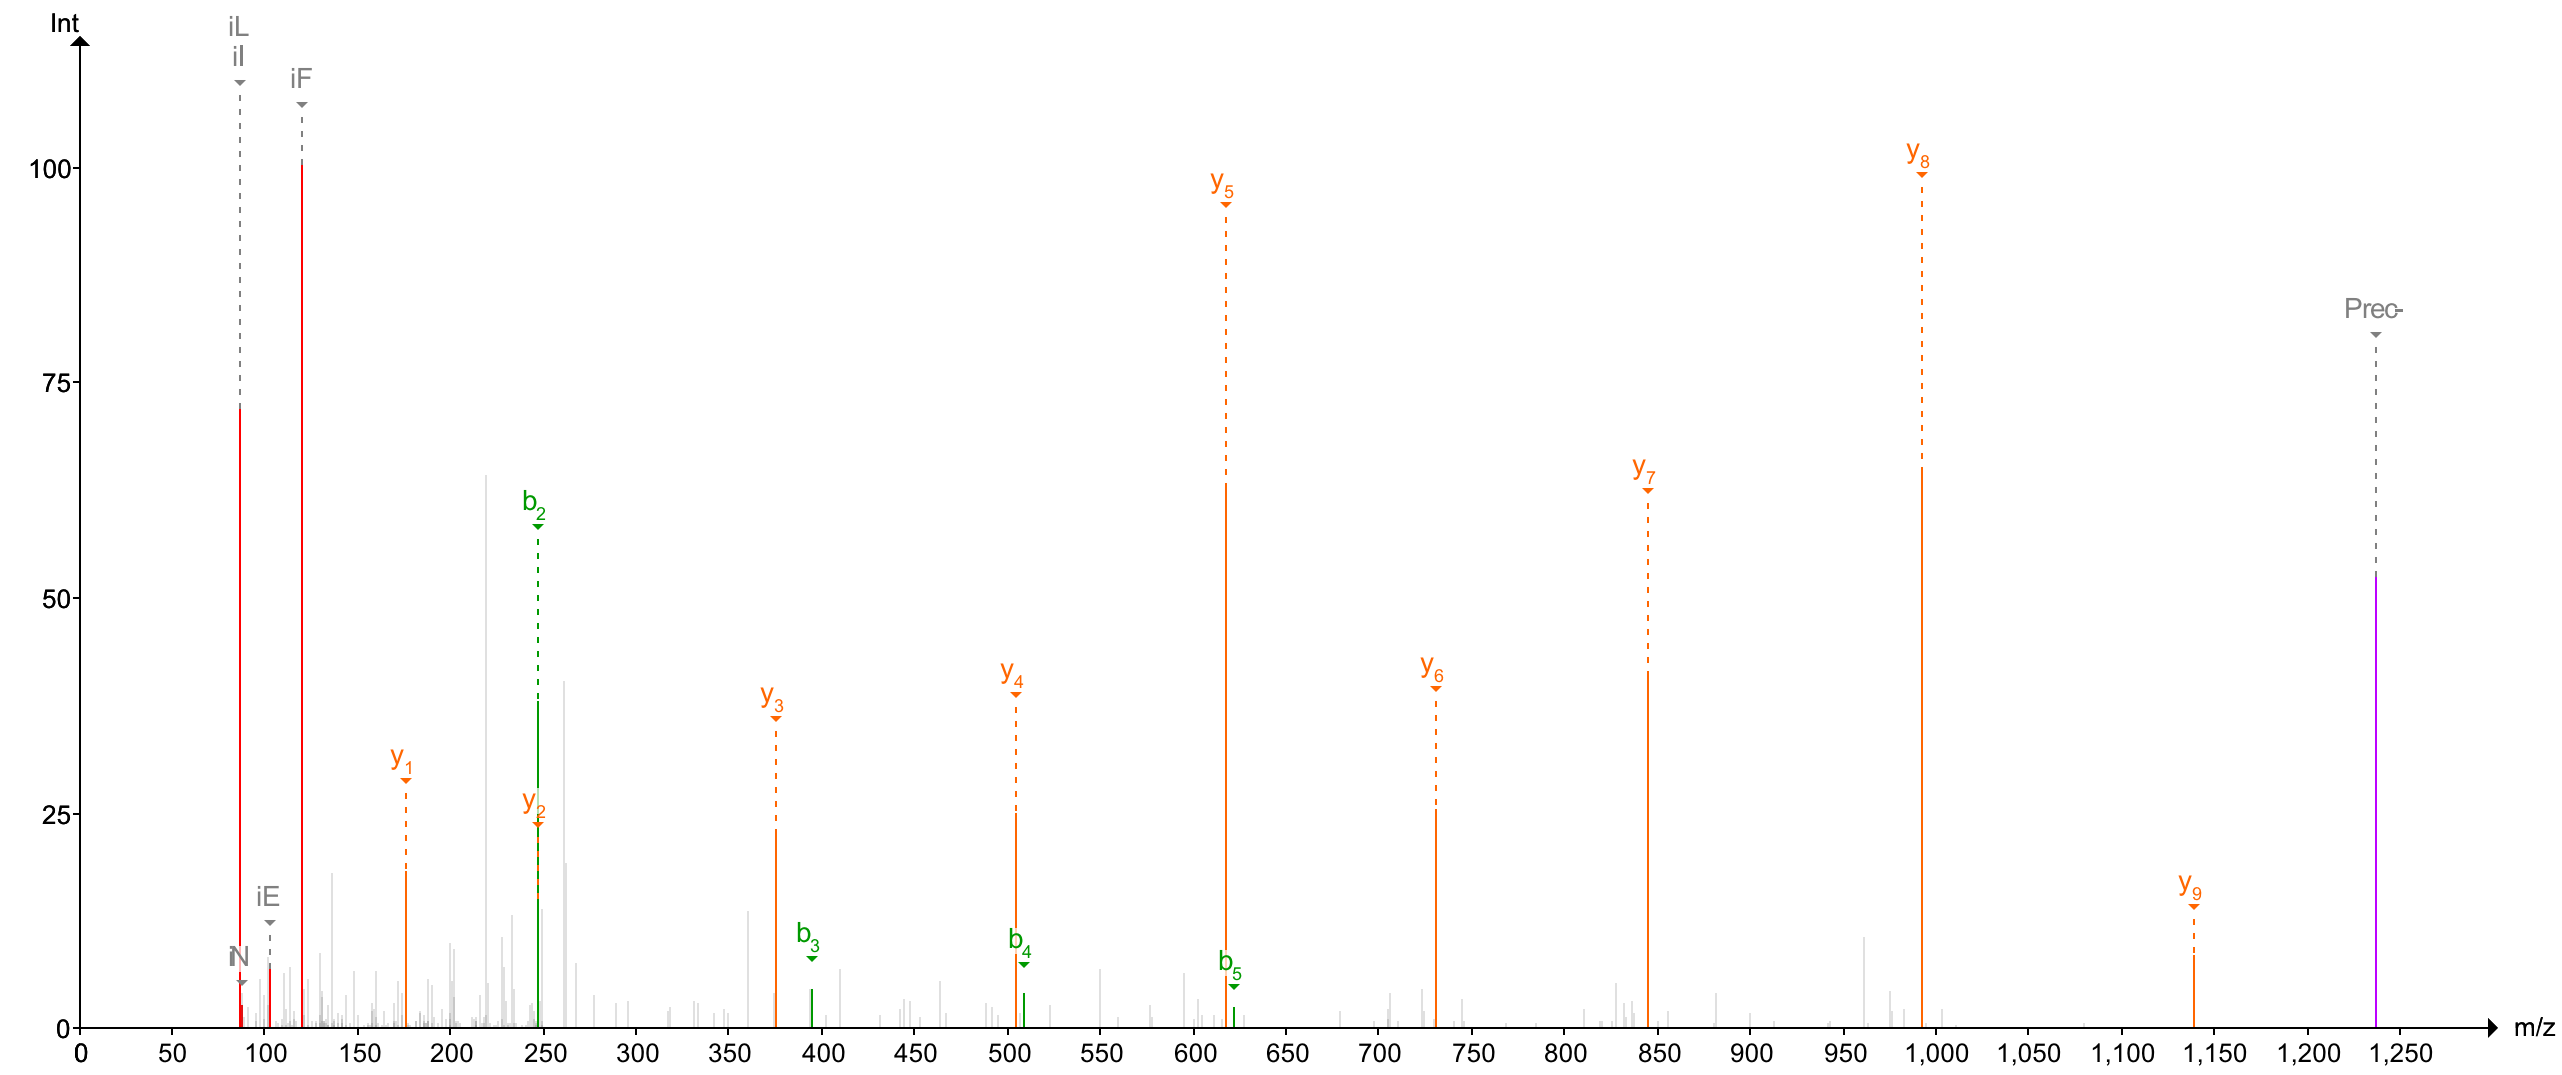



NH<sub>2</sub>-E Q E E A I I A Q F P Y V E F T G I R-COOH

<sup>y<sub>15</sub></sup> <sup>y<sub>14</sub></sup> <sup>y<sub>13</sub></sup> <sup>y<sub>12</sub></sup> <sup>y<sub>11</sub></sup> <sup>y<sub>10</sub></sup> <sup>y<sub>9</sub></sup> <sup>y<sub>8</sub></sup>  
<sub>b<sub>2</sub></sub> <sub>b<sub>3</sub></sub> <sub>b<sub>4</sub></sub> <sub>b<sub>5</sub></sub> <sub>b<sub>6</sub></sub> <sub>b<sub>7</sub></sub> <sub>b<sub>9</sub></sub>

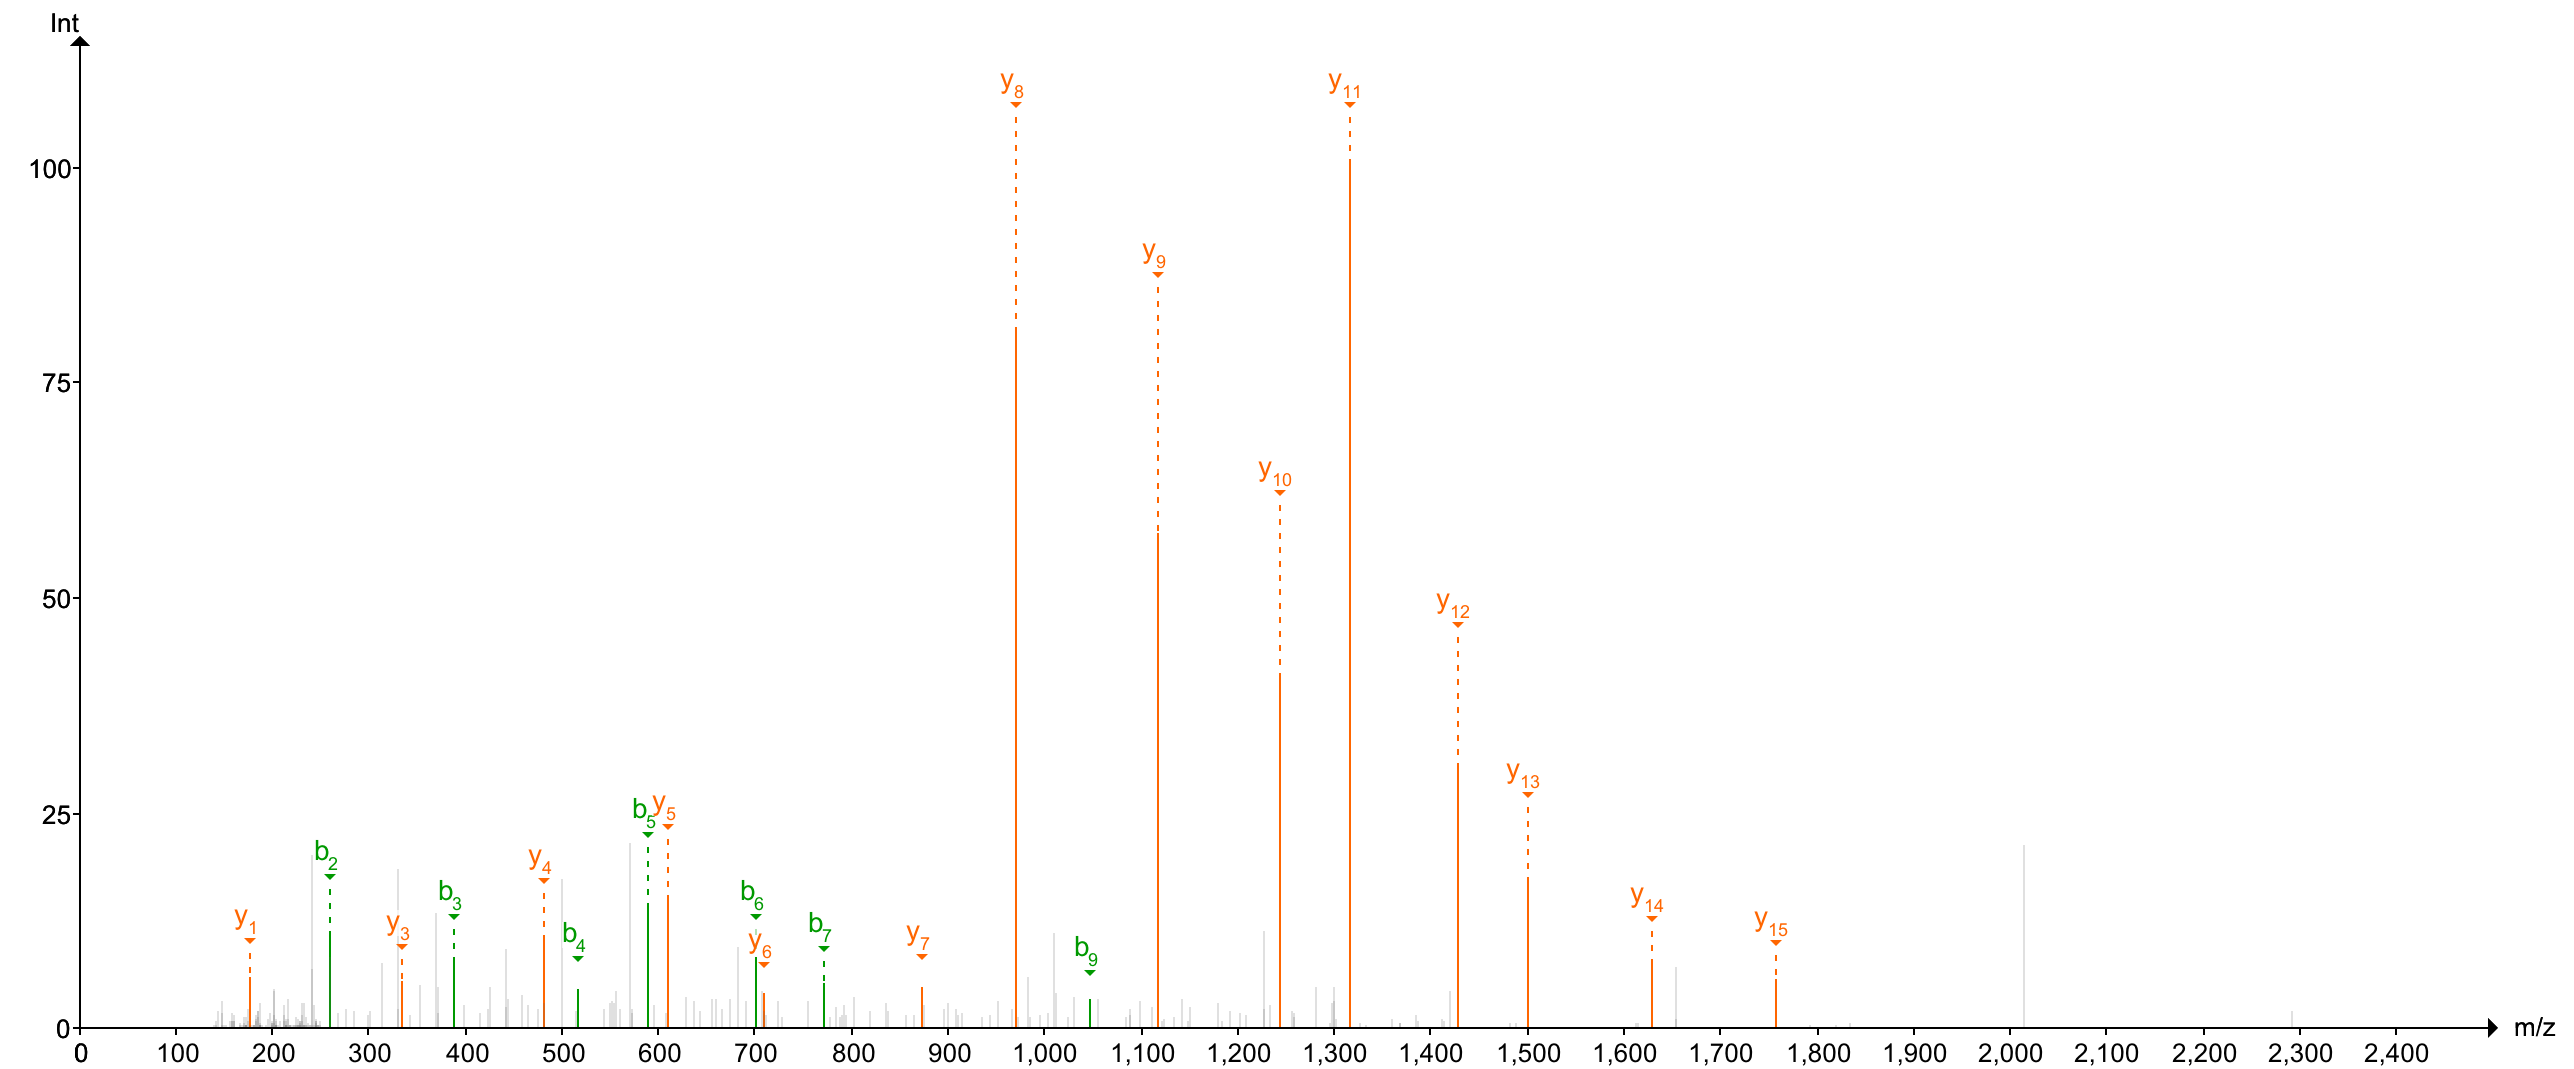

NH<sub>2</sub>-S L I I I V H P S W F I R-COOH  
b<sub>2</sub> y<sub>1</sub> y<sub>2</sub> y<sub>3</sub> y<sub>4</sub> y<sub>5</sub> y<sub>6</sub> y<sub>7</sub> y<sub>8</sub> y<sub>9</sub> y<sub>10</sub>

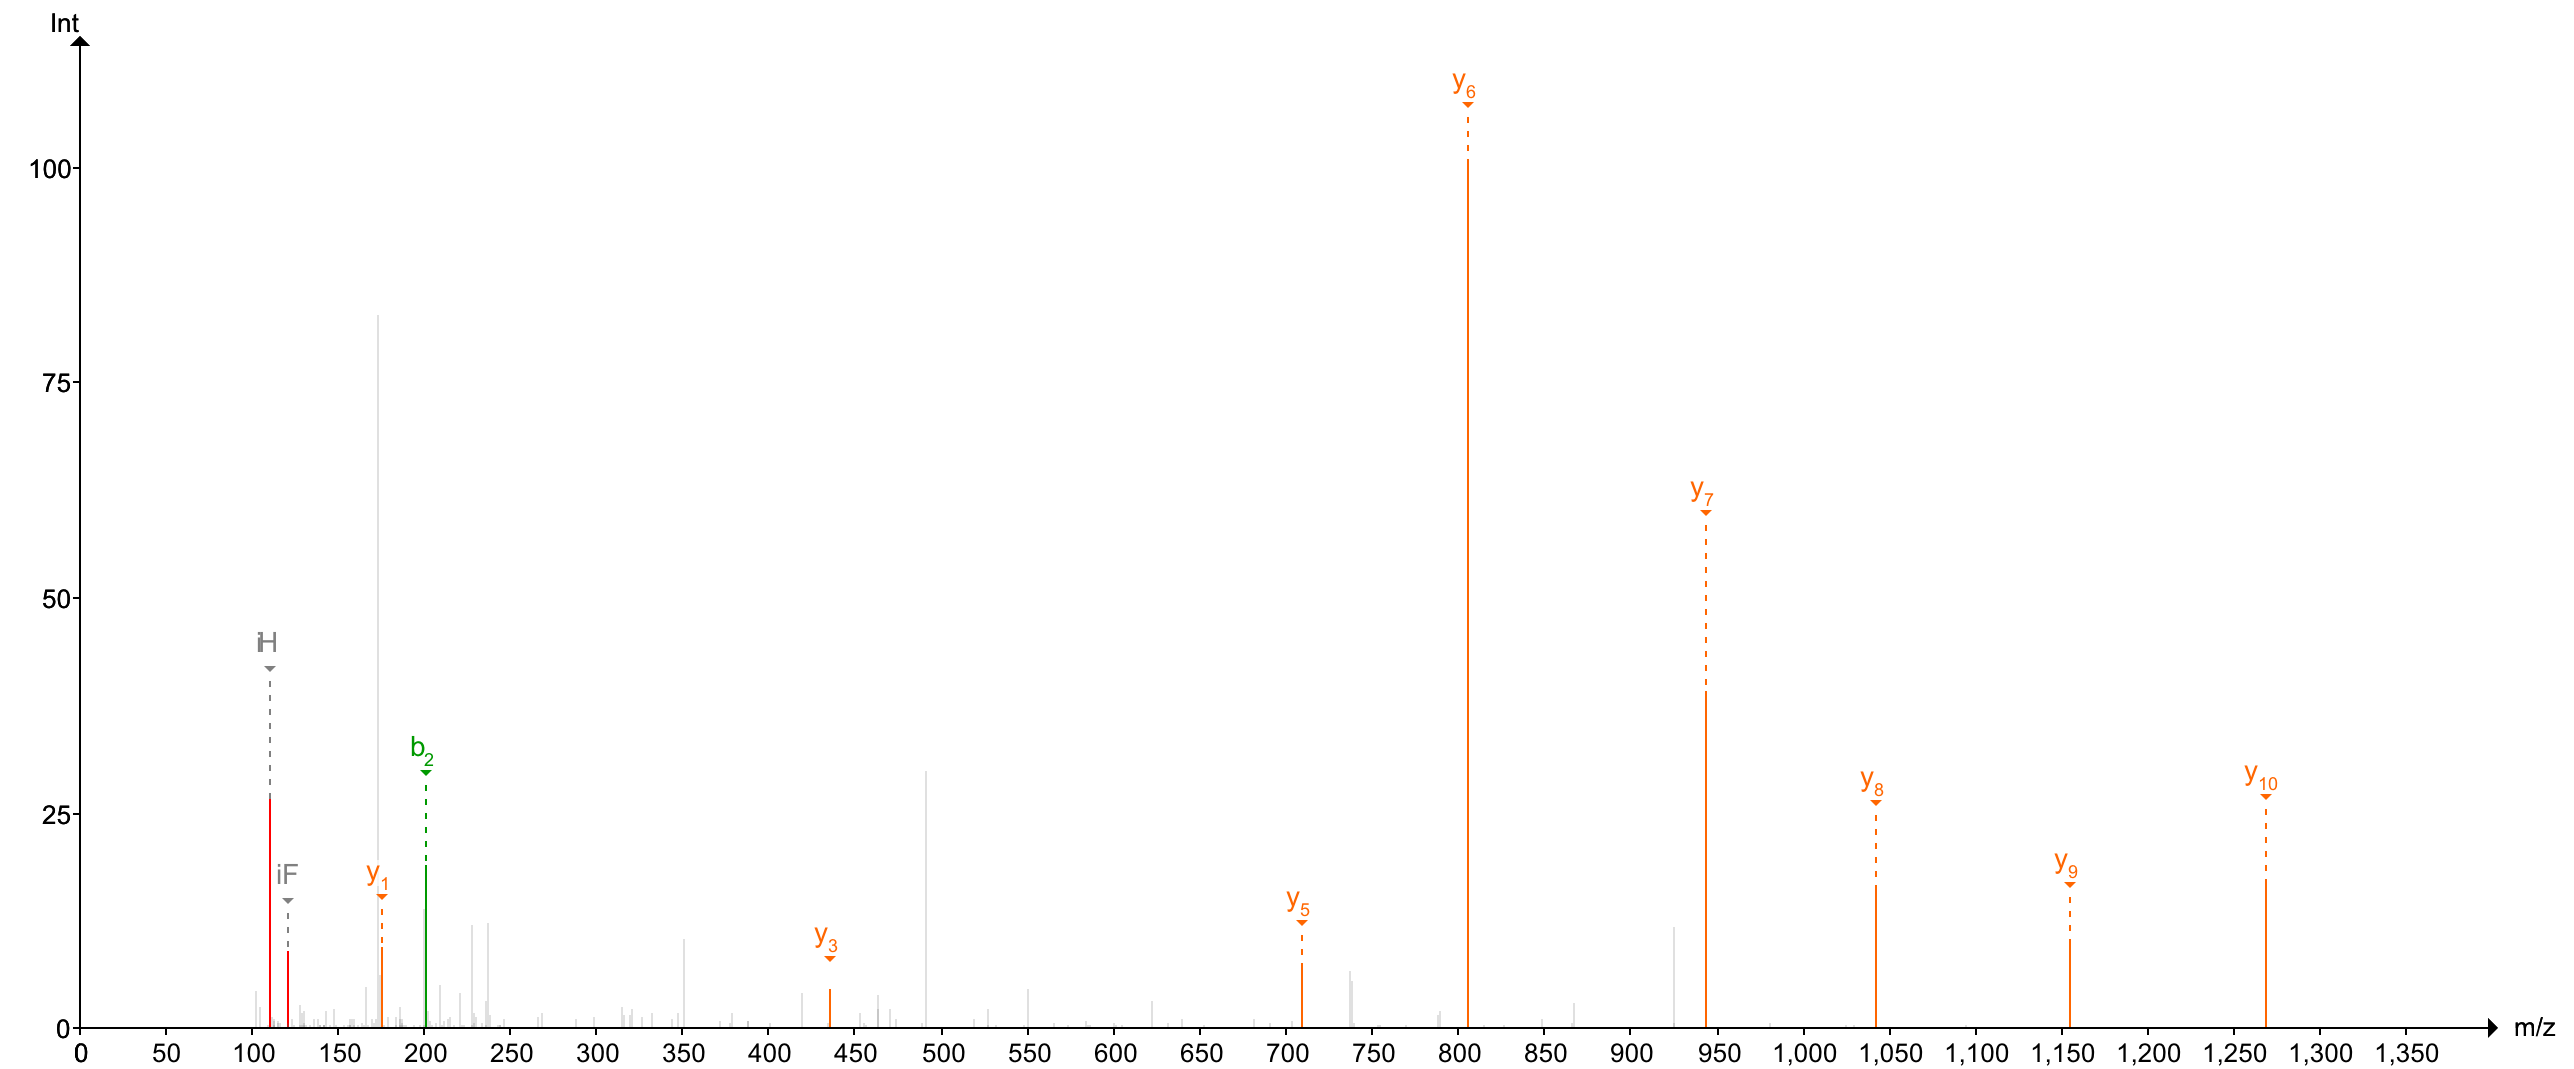

NH<sub>2</sub>-L F V P A L L D K P E T D L L S H L D R-COOH

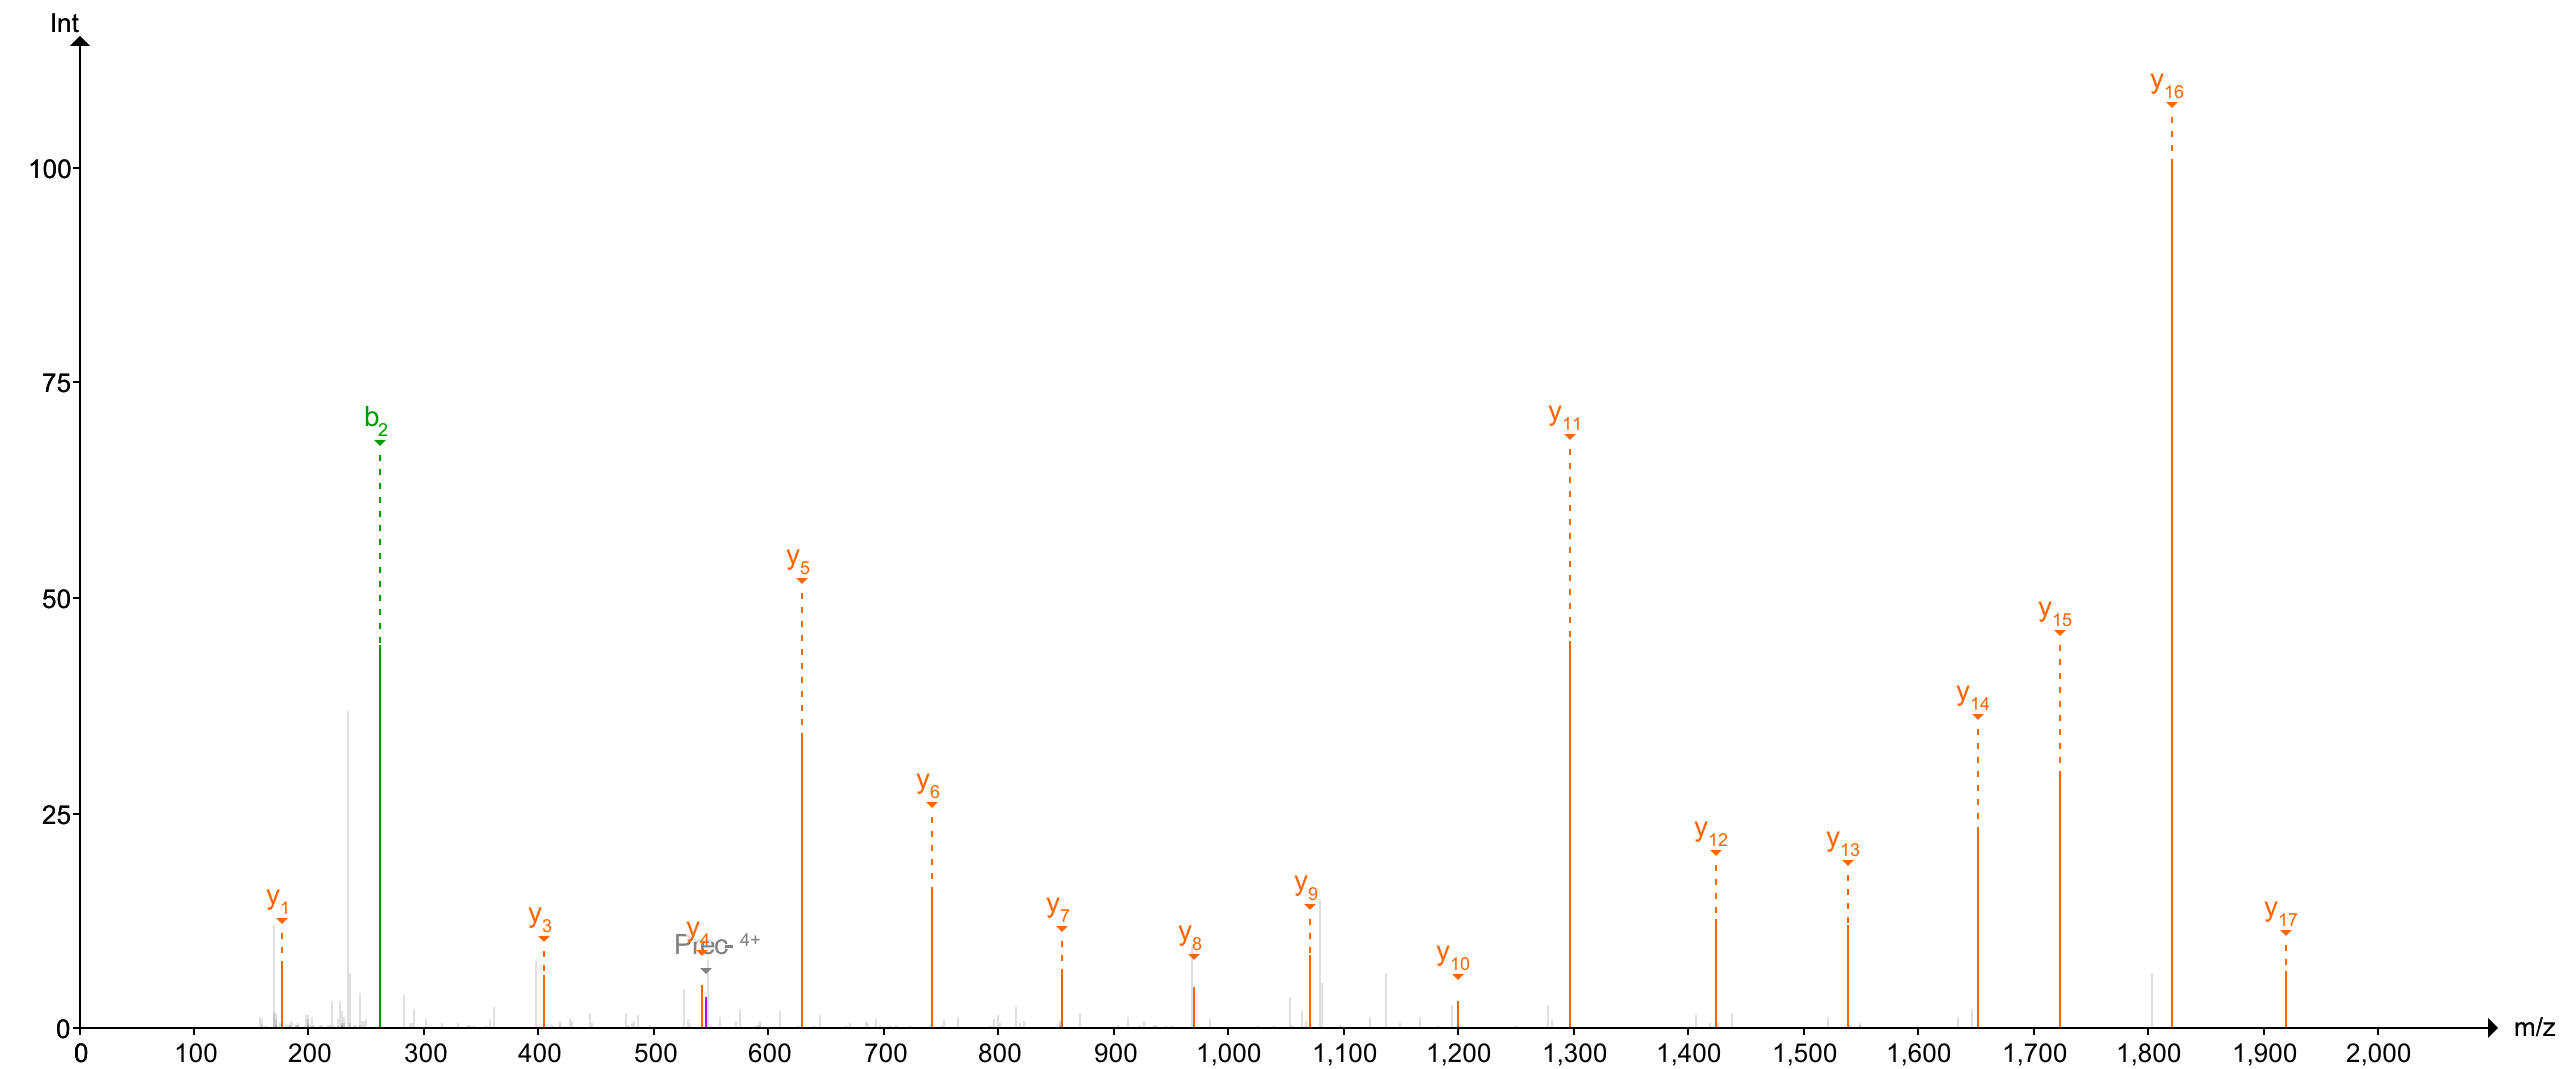

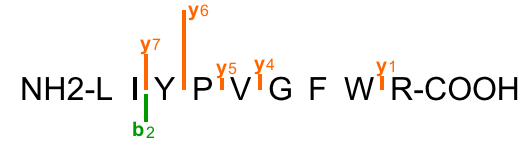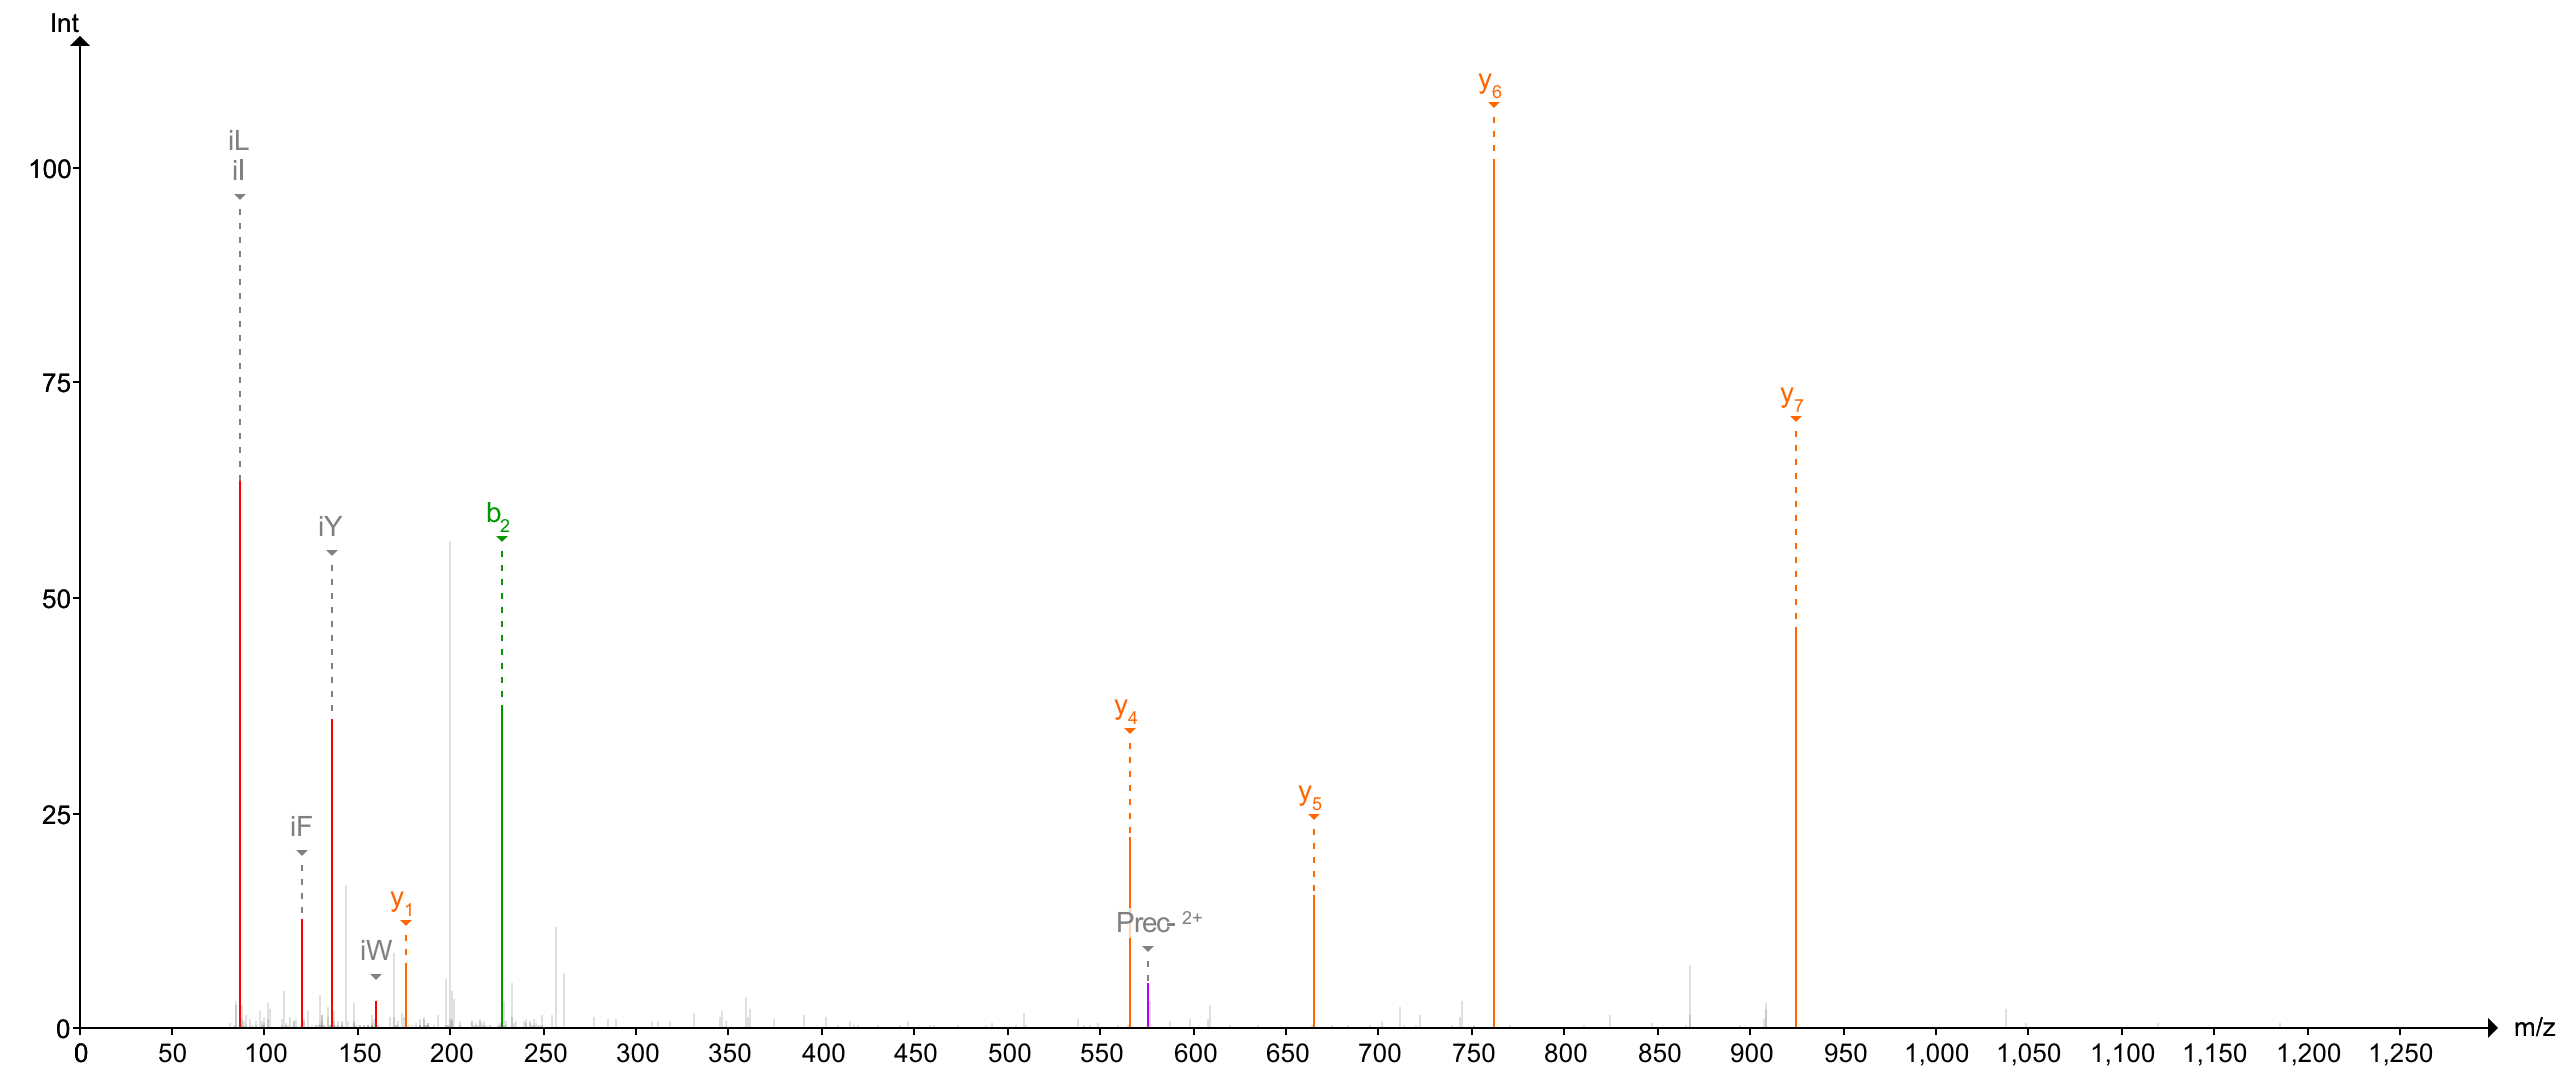

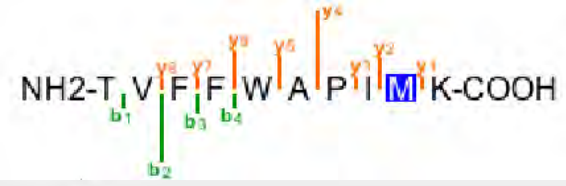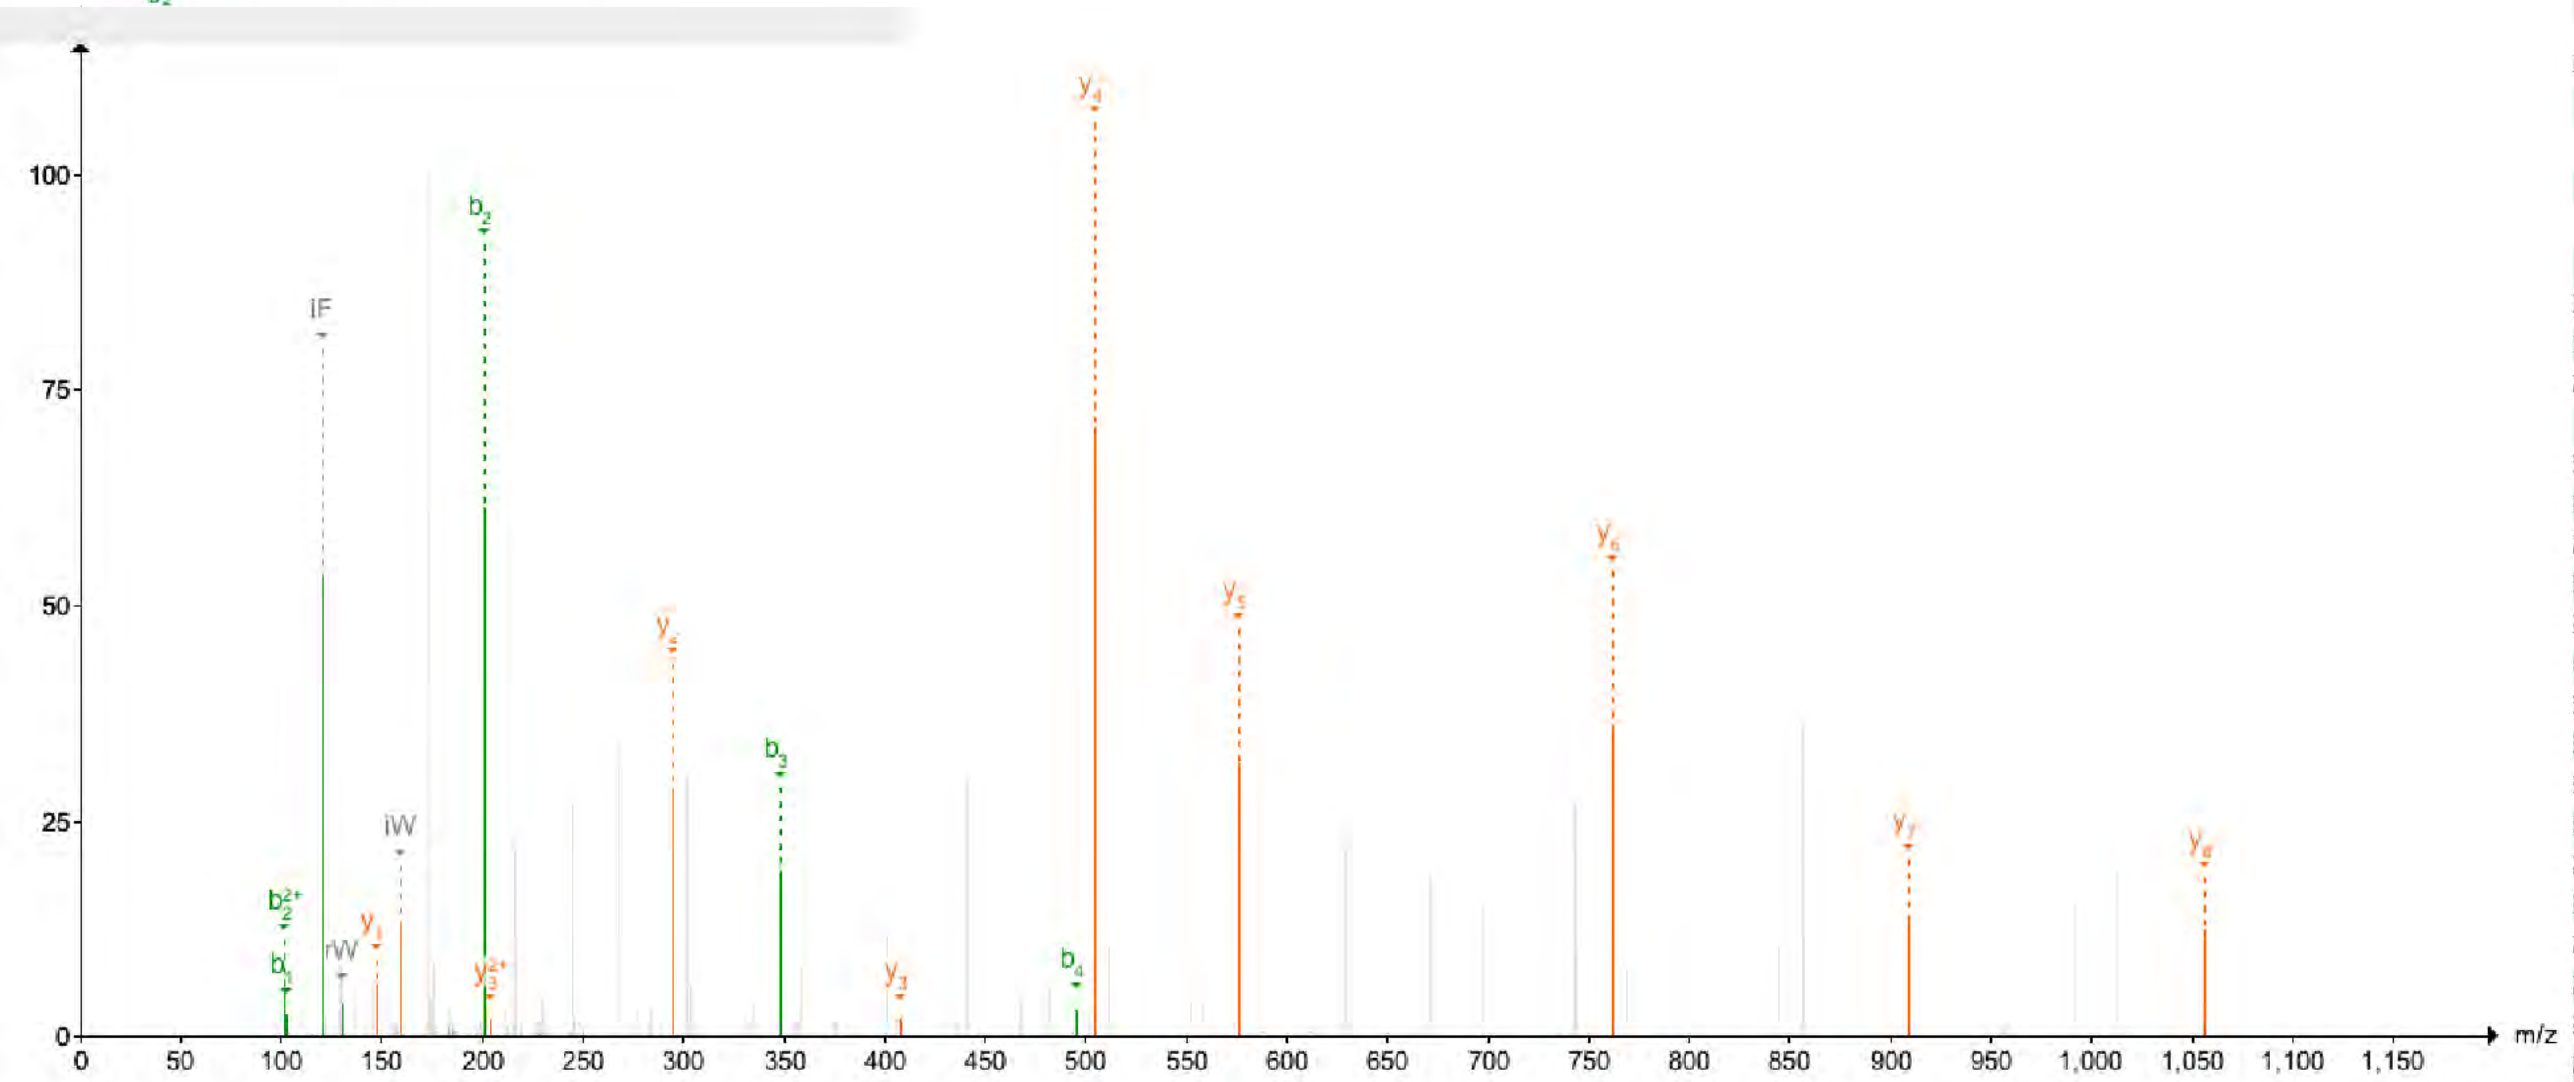

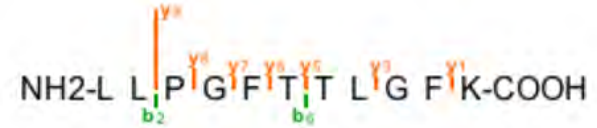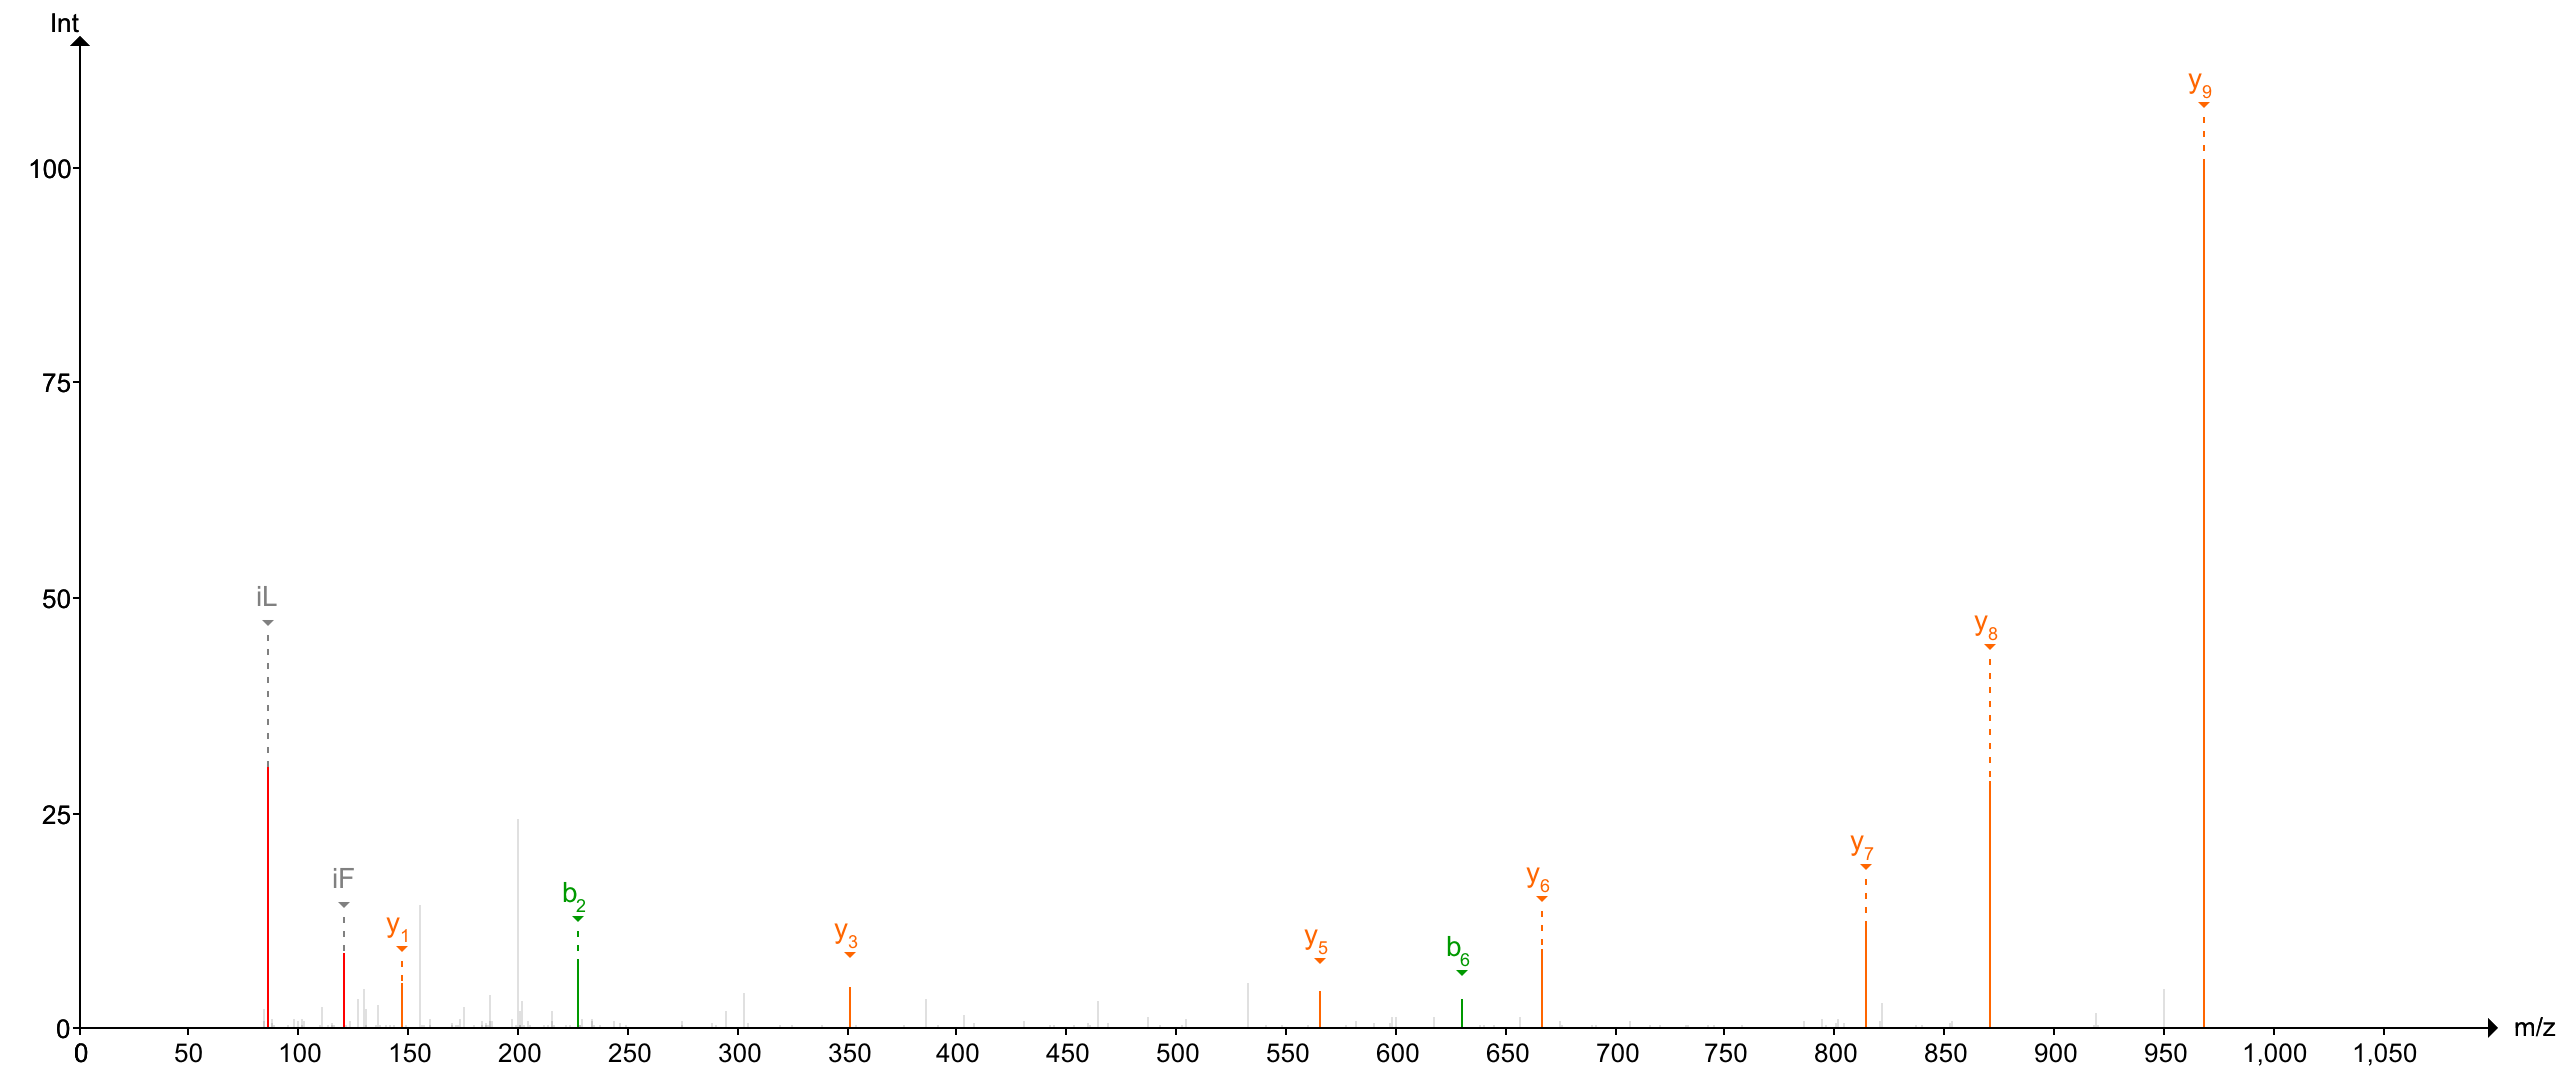

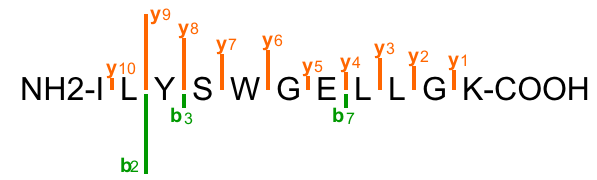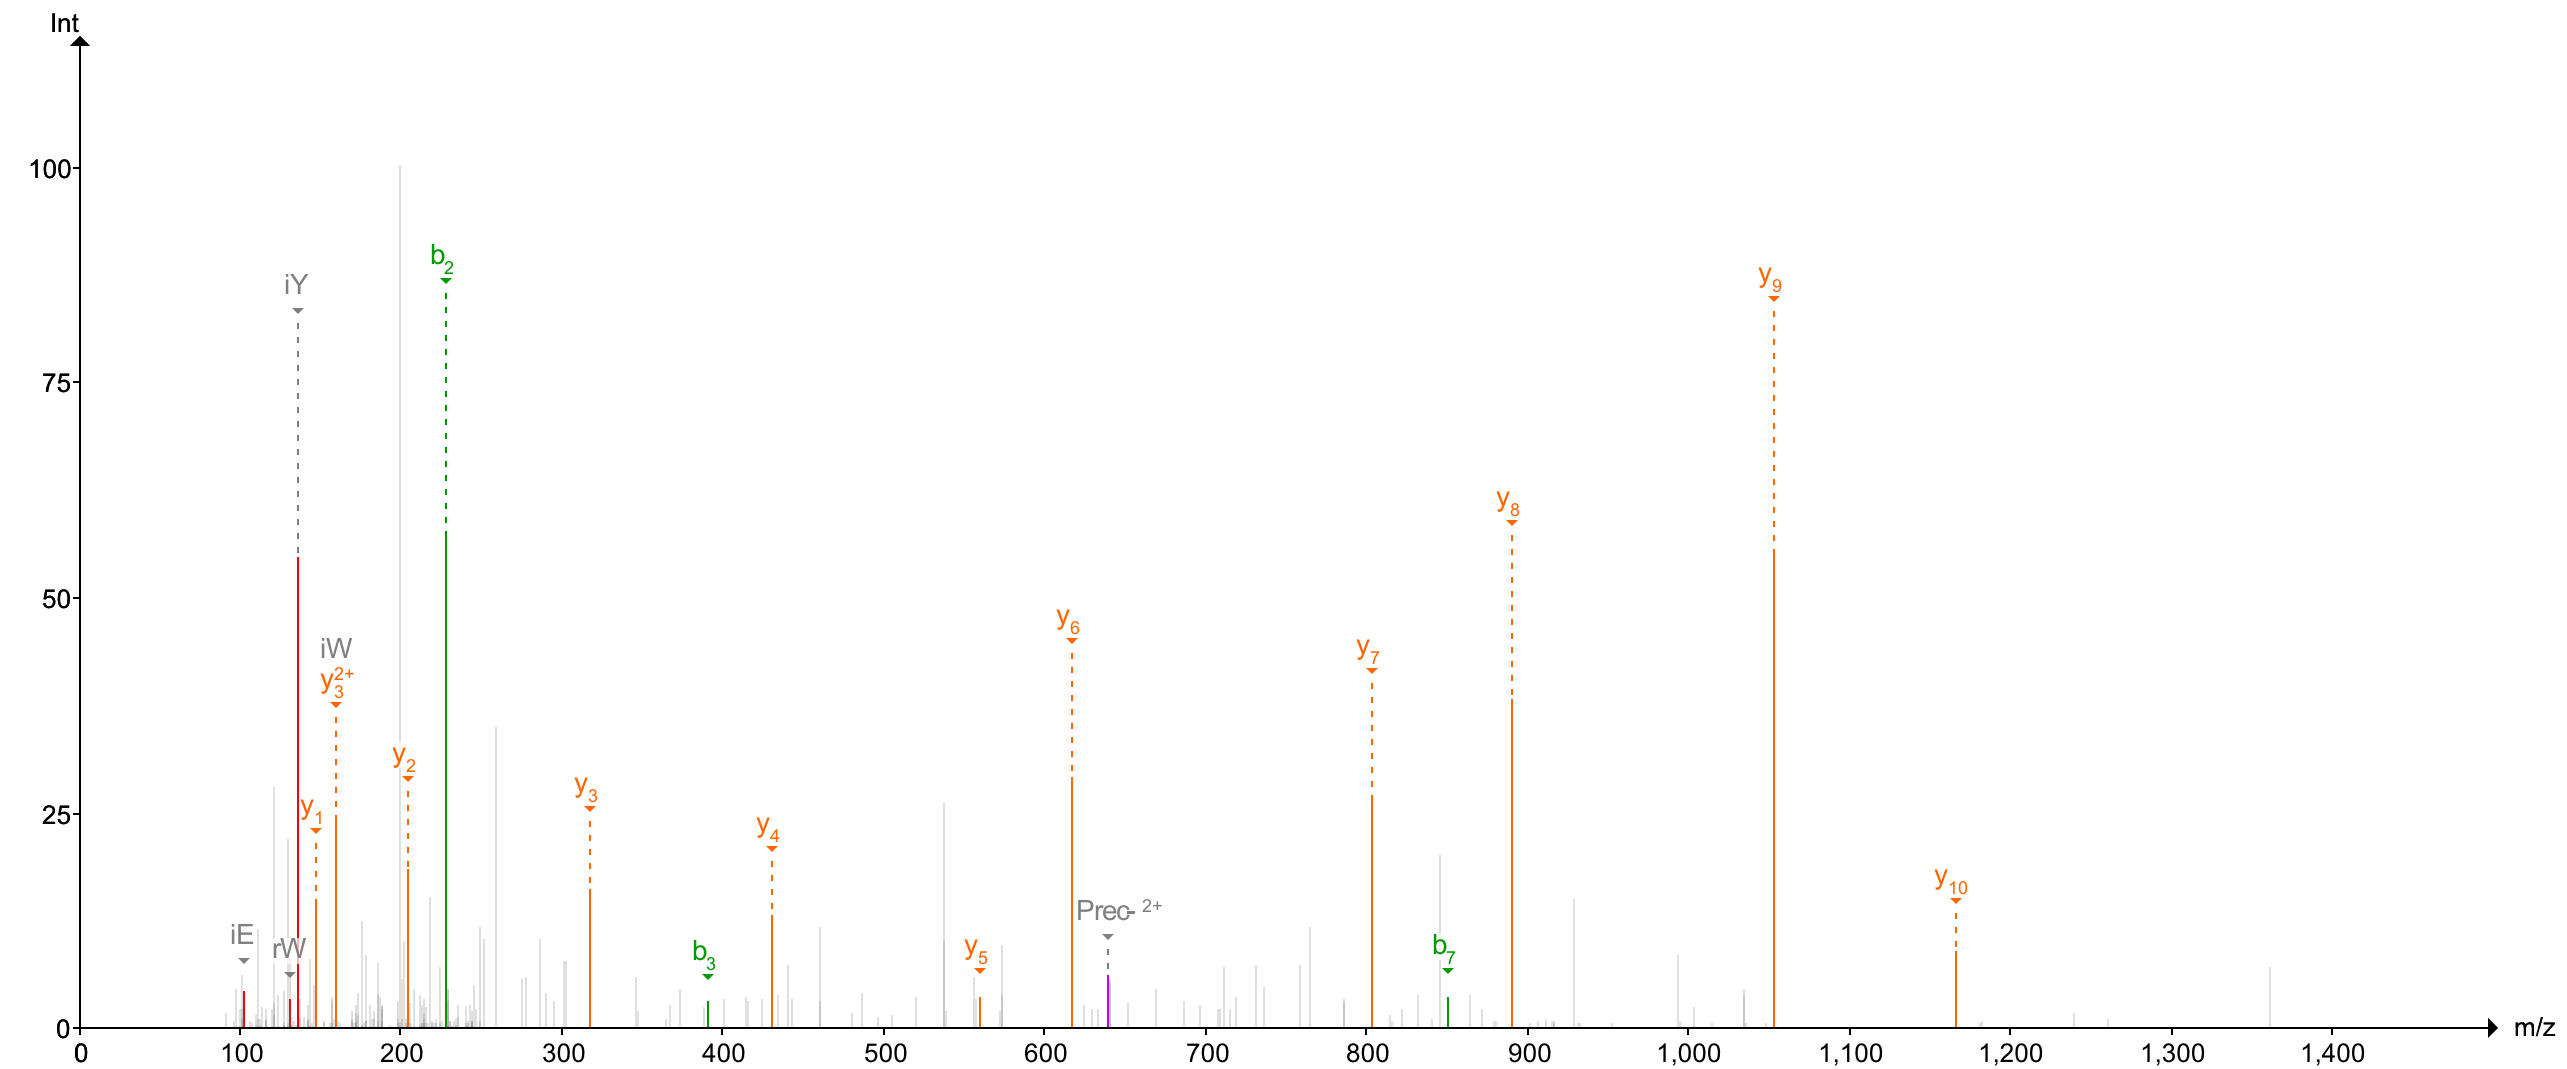

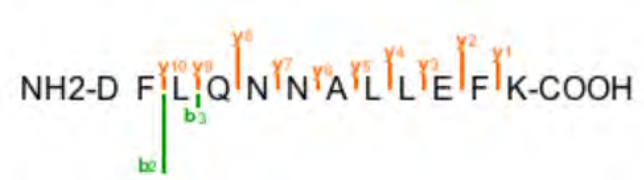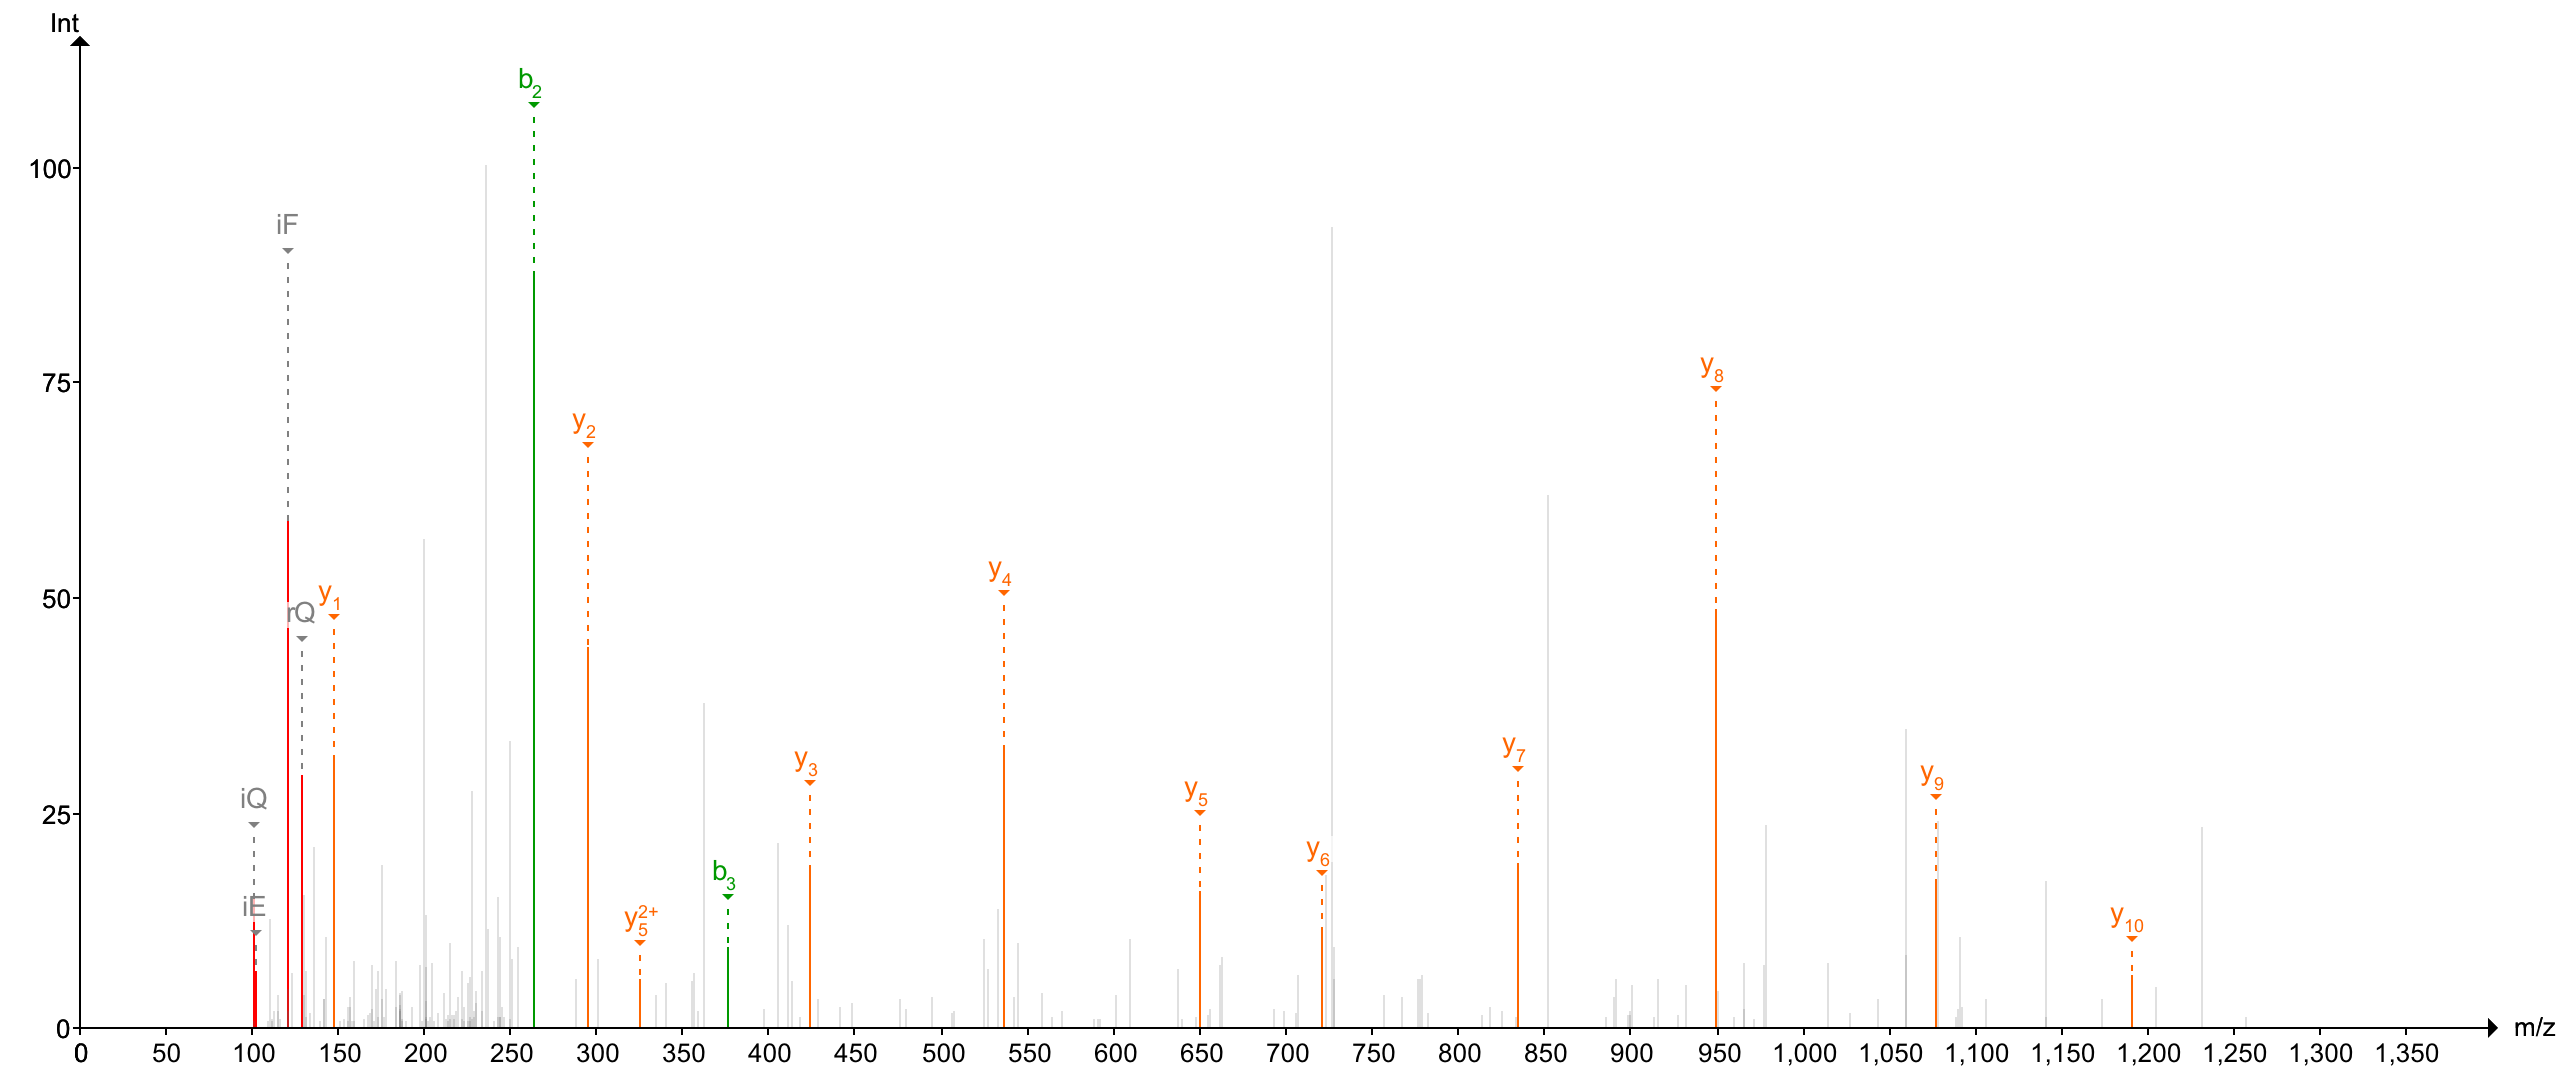



NH<sub>2</sub>-L L<sub>1</sub>D<sub>1</sub>A P G<sub>1</sub>I<sub>1</sub>V<sub>1</sub>P<sub>1</sub>G<sub>1</sub>P<sub>1</sub>N<sub>1</sub>S<sub>1</sub>E<sub>1</sub>V<sub>1</sub>G<sub>1</sub>T<sub>1</sub>I<sub>1</sub>L<sub>1</sub>R-COOH

b<sub>2</sub> b<sub>3</sub> b<sub>5</sub> b<sub>7</sub> b<sub>8</sub> b<sub>10</sub> b<sub>14</sub>

y<sub>13</sub> y<sub>11</sub> y<sub>10</sub> y<sub>9</sub> y<sub>8</sub> y<sub>7</sub> y<sub>6</sub> y<sub>5</sub> y<sub>3</sub> y<sub>2</sub> y<sub>1</sub>

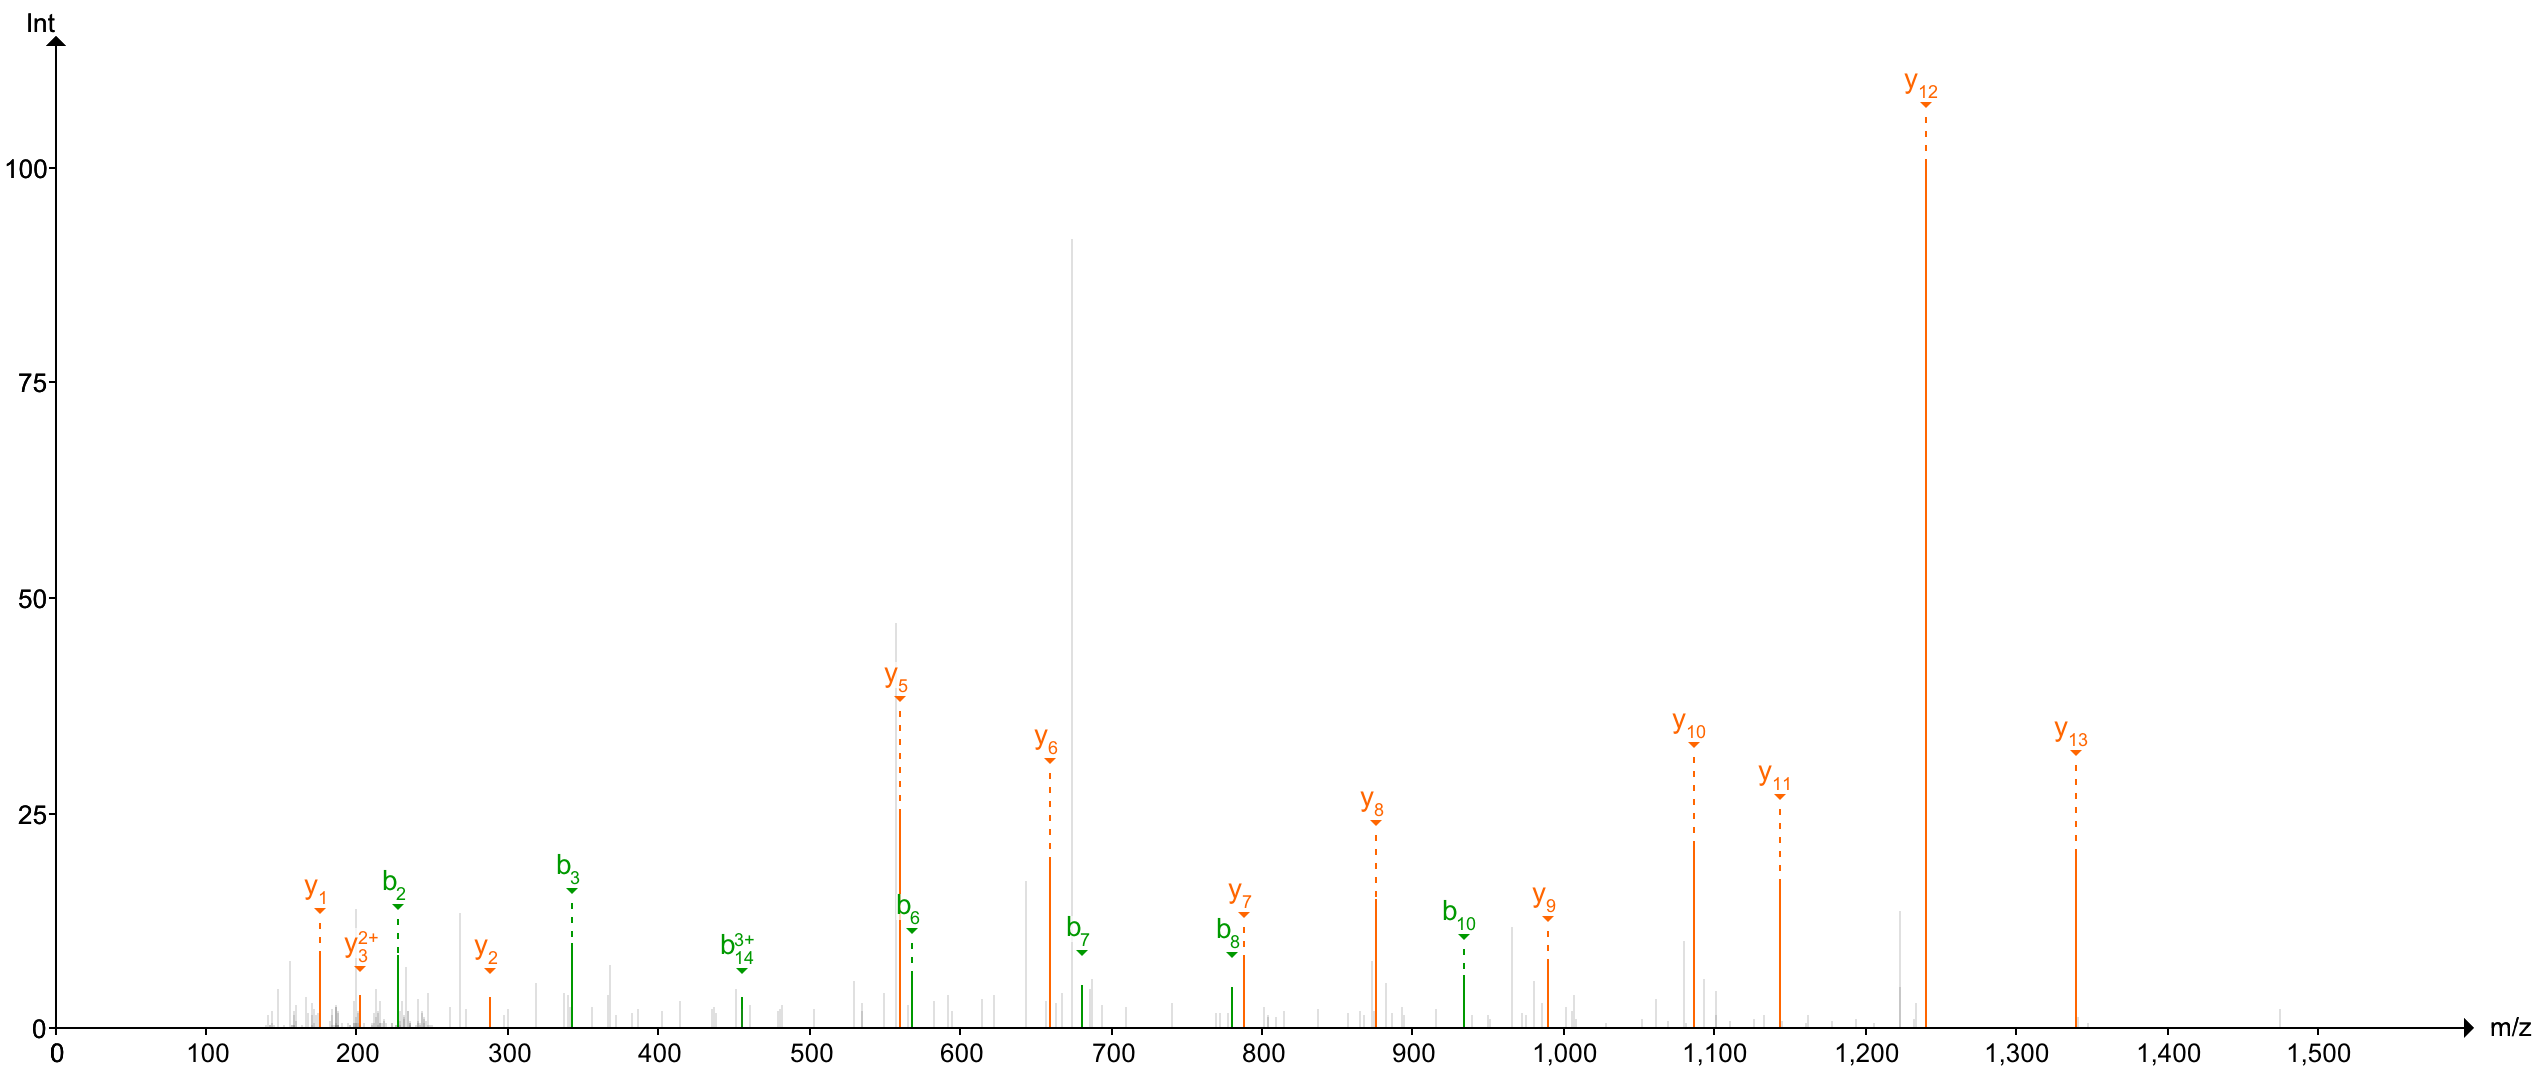

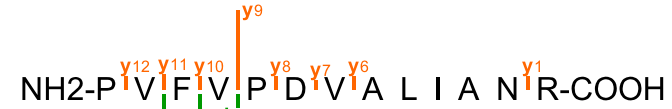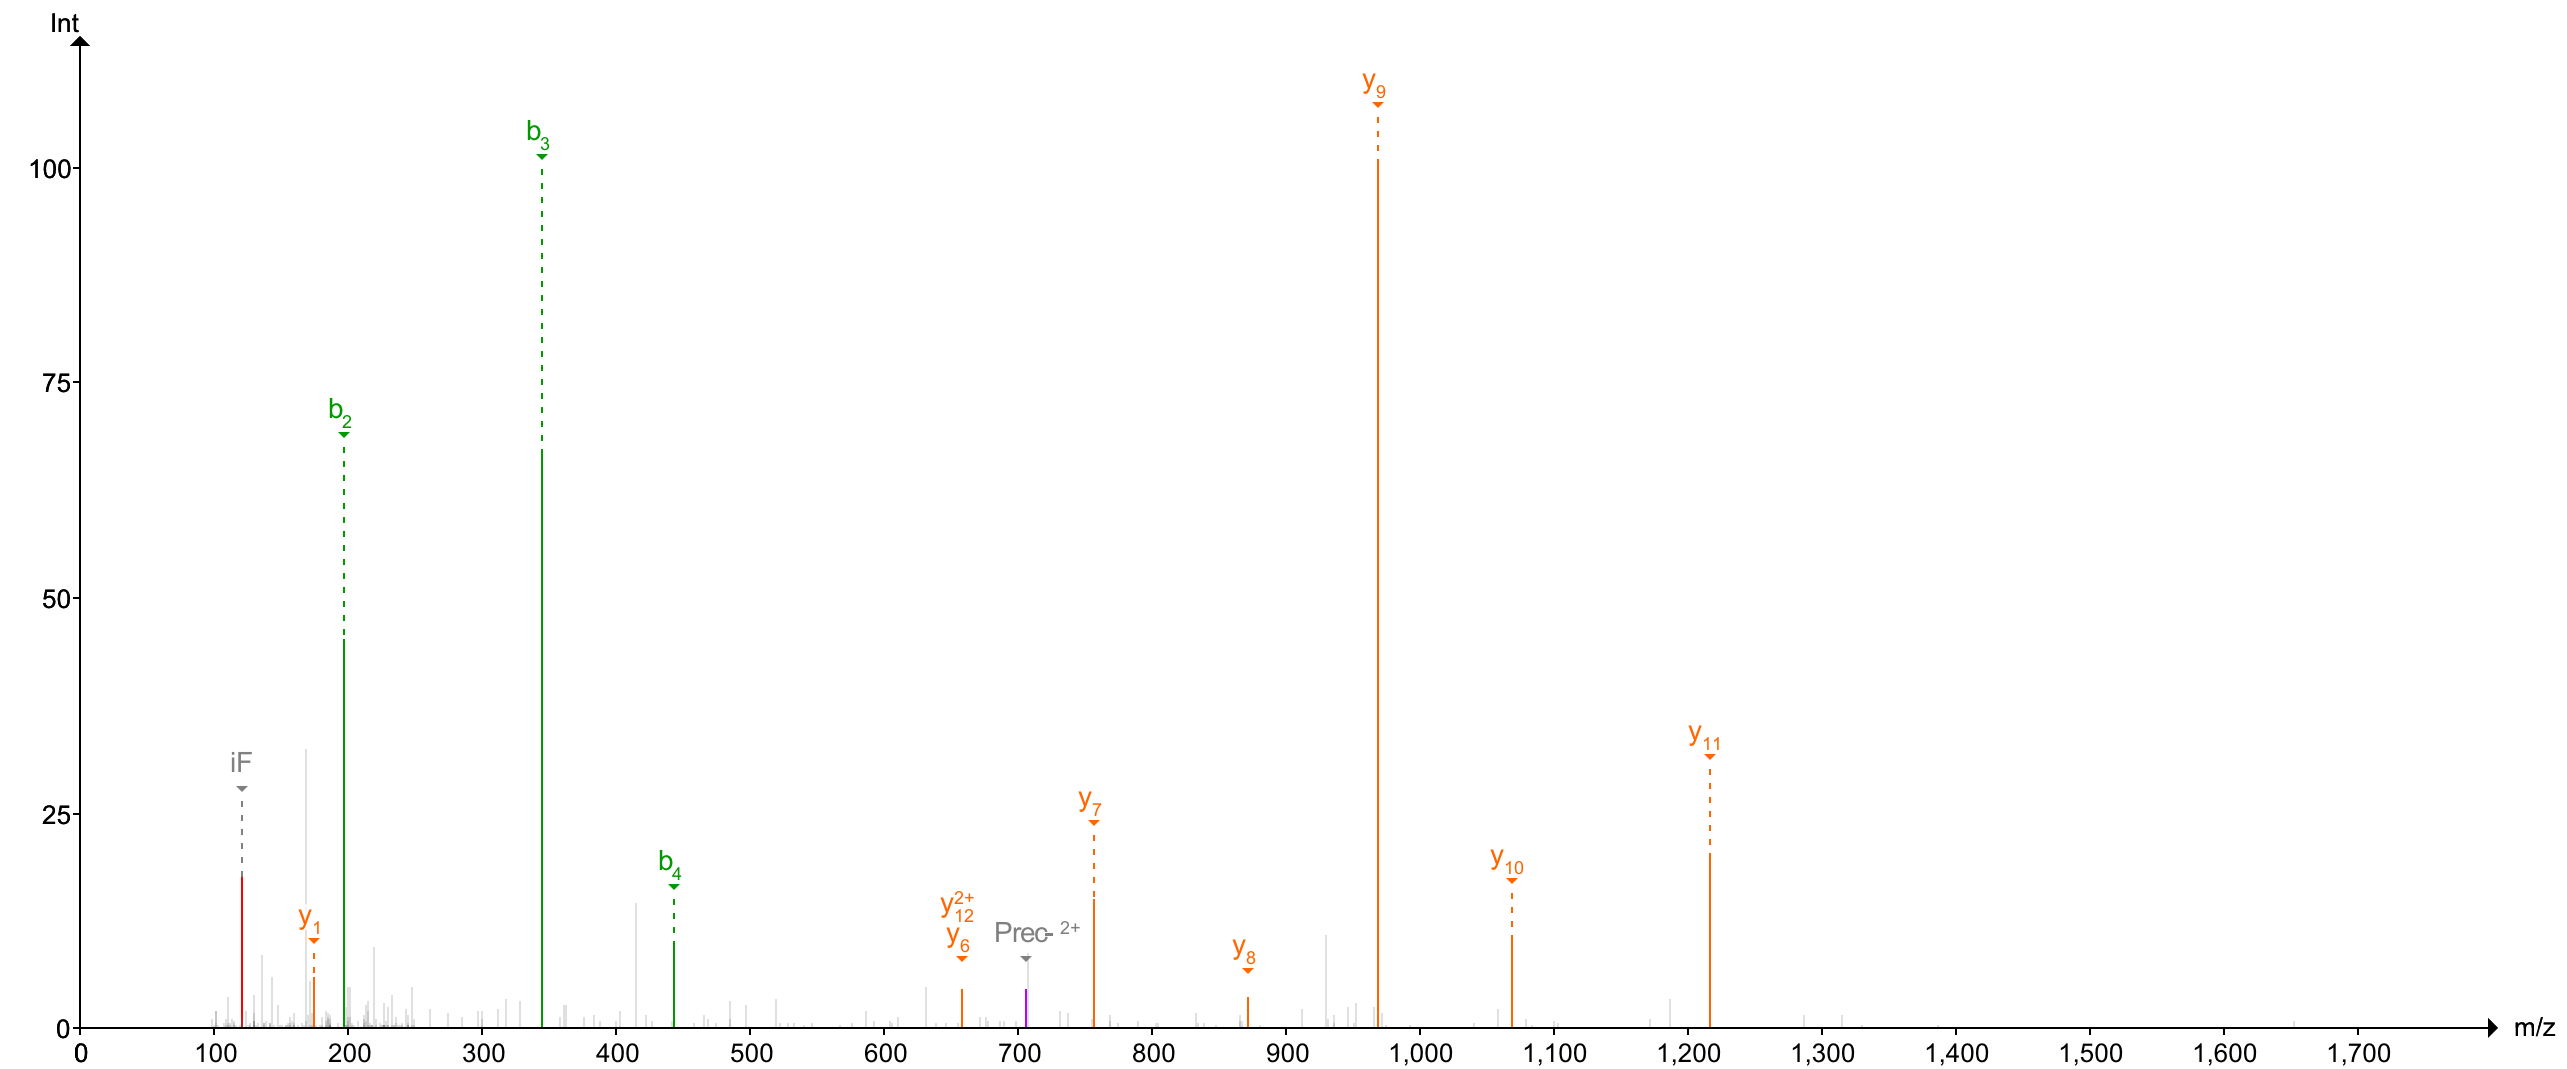

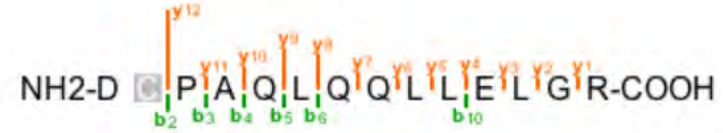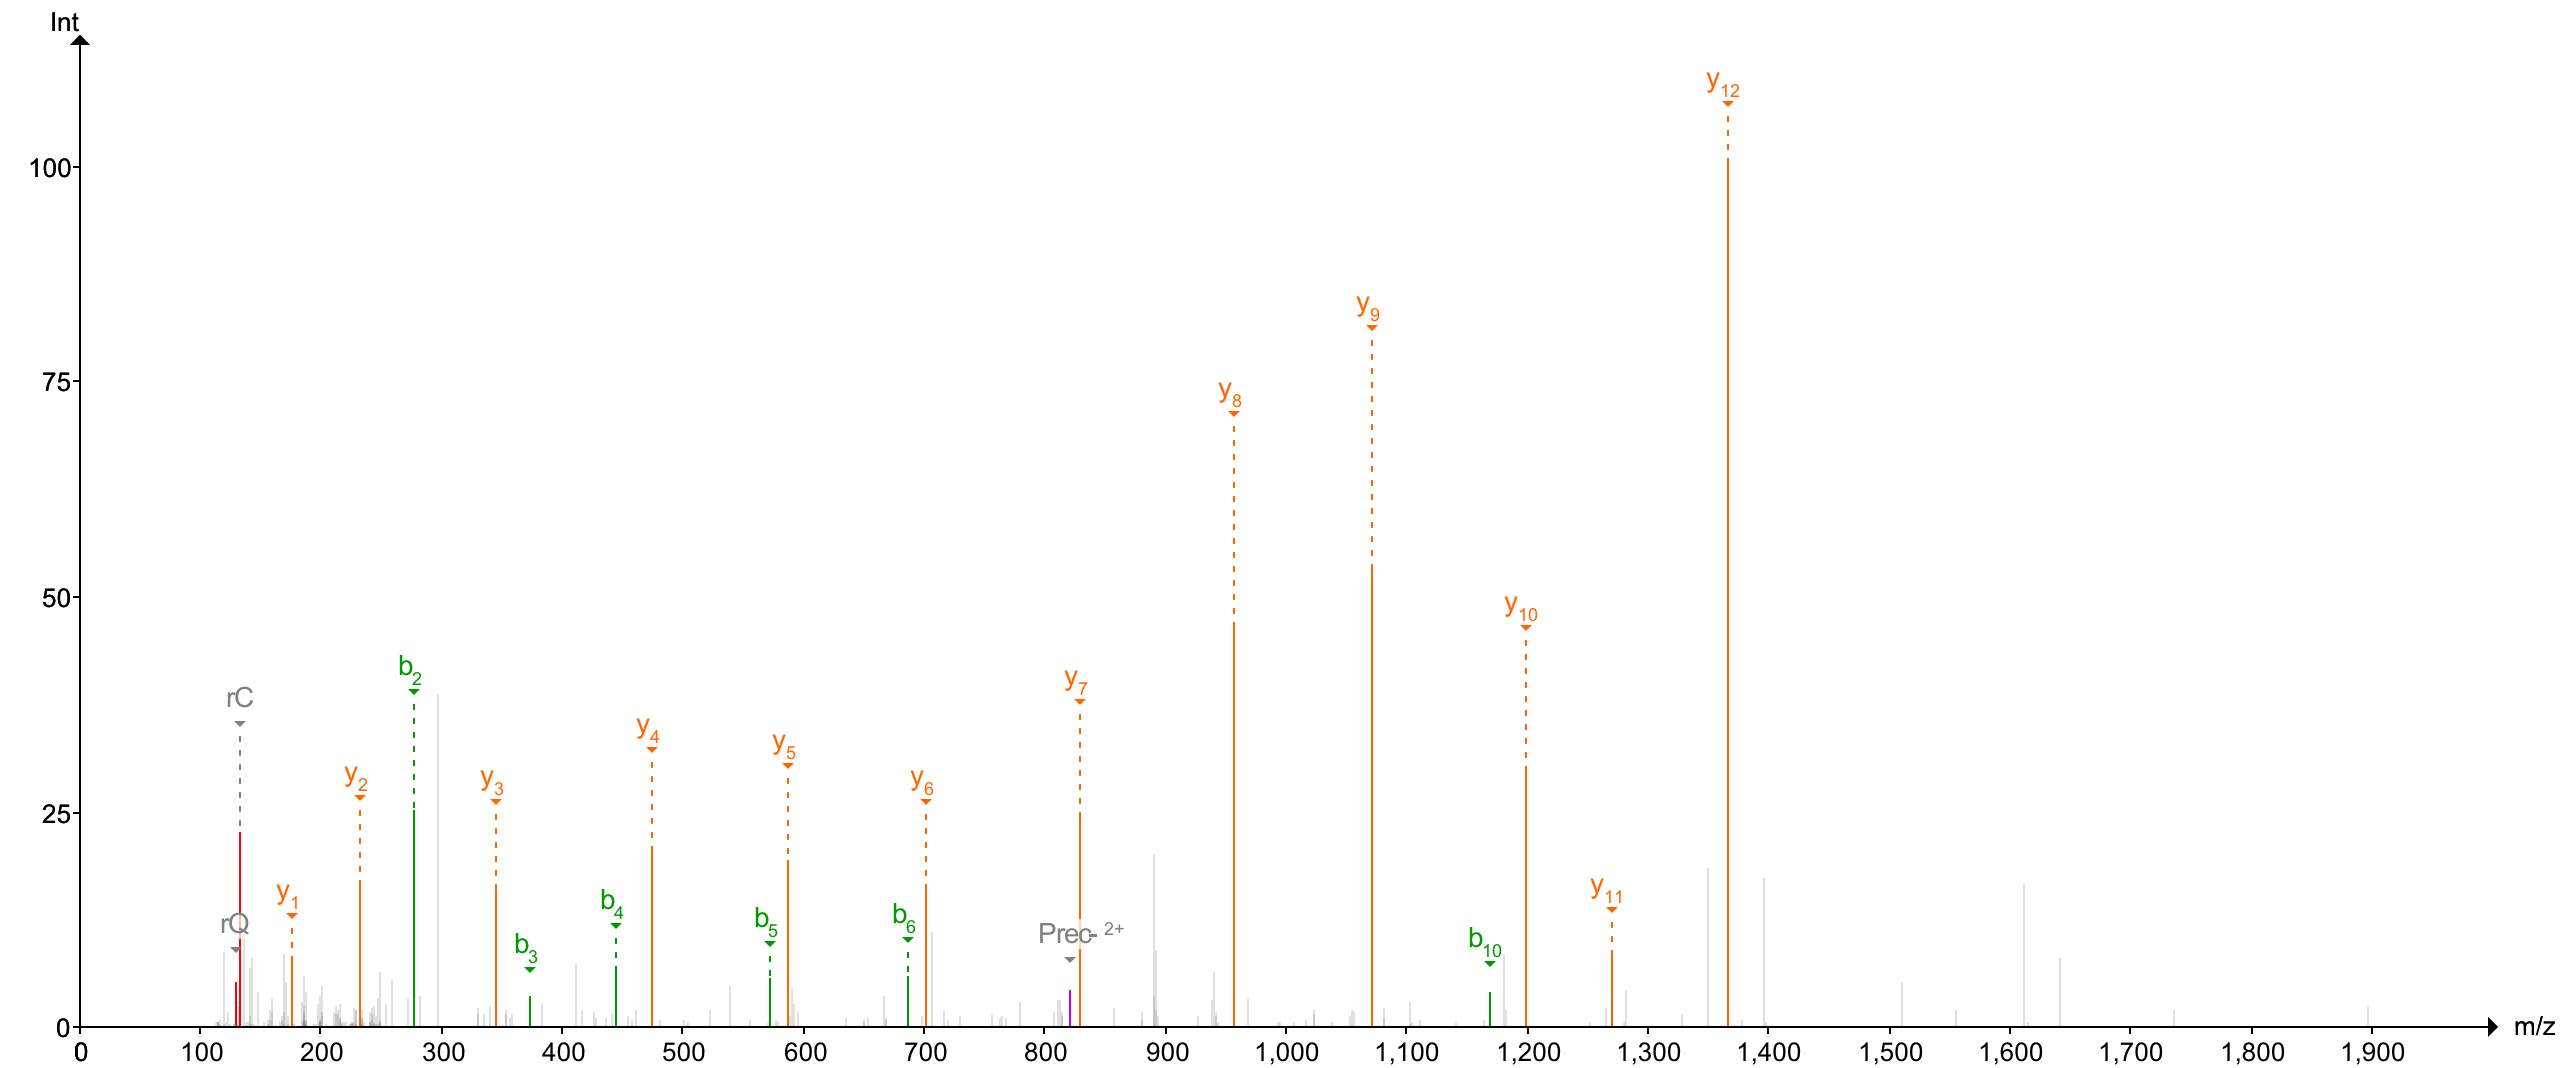

NH<sub>2</sub>-N A I A E T I I I A L T K-COOH

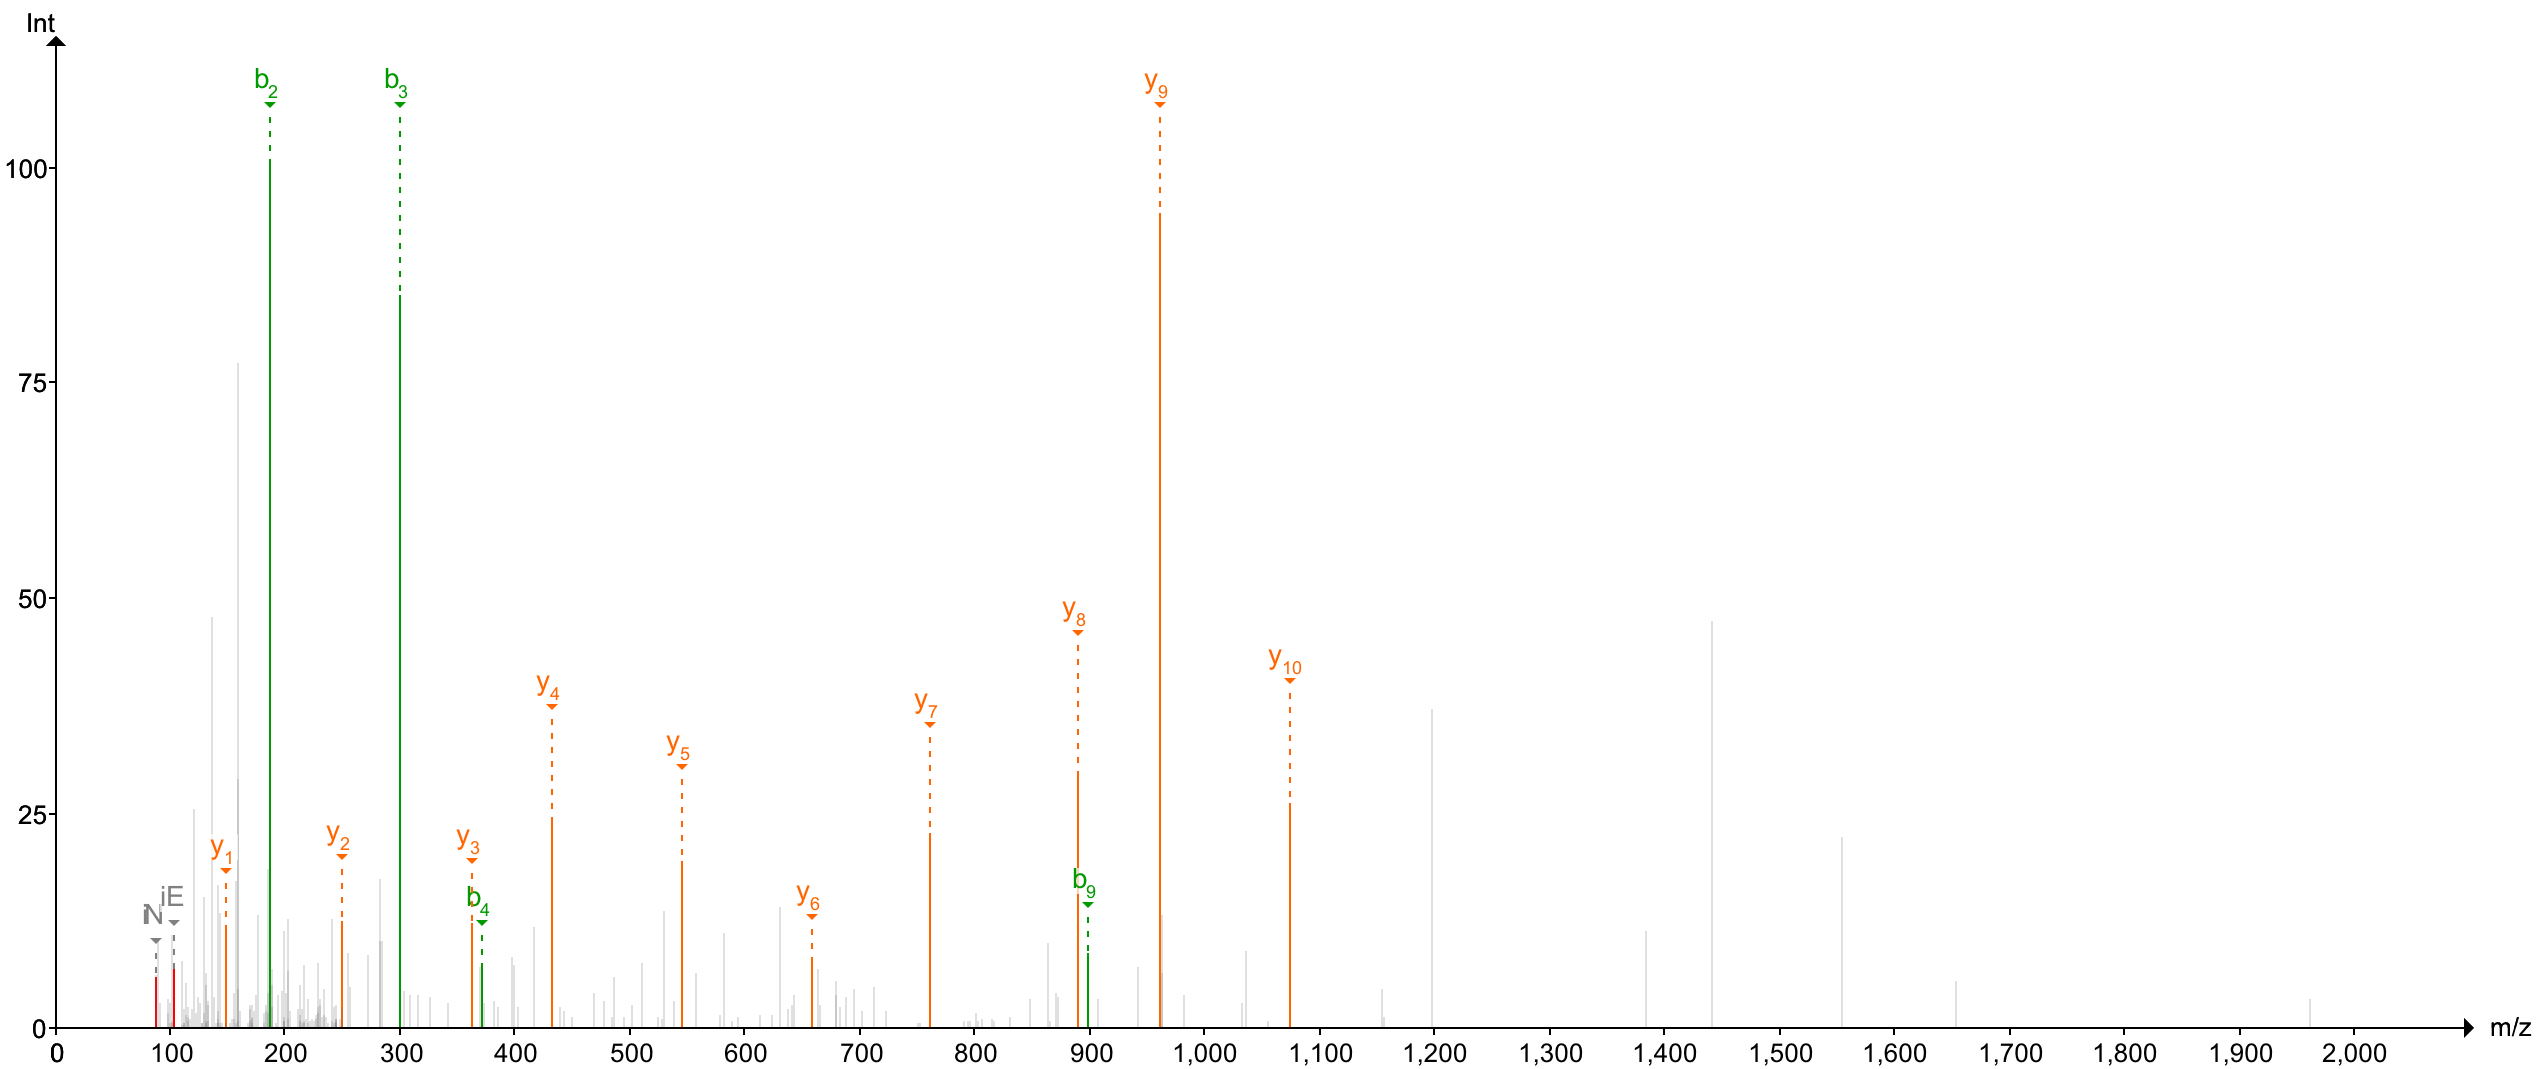

NH<sub>2</sub>-I L S V Q G T E P L V L F K-COOH

b<sub>2</sub> b<sub>3</sub> b<sub>4</sub> b<sub>5</sub>

y<sub>12</sub> y<sub>11</sub> y<sub>10</sub> y<sub>9</sub> y<sub>8</sub> y<sub>7</sub> y<sub>6</sub> y<sub>4</sub> y<sub>3</sub> y<sub>2</sub>

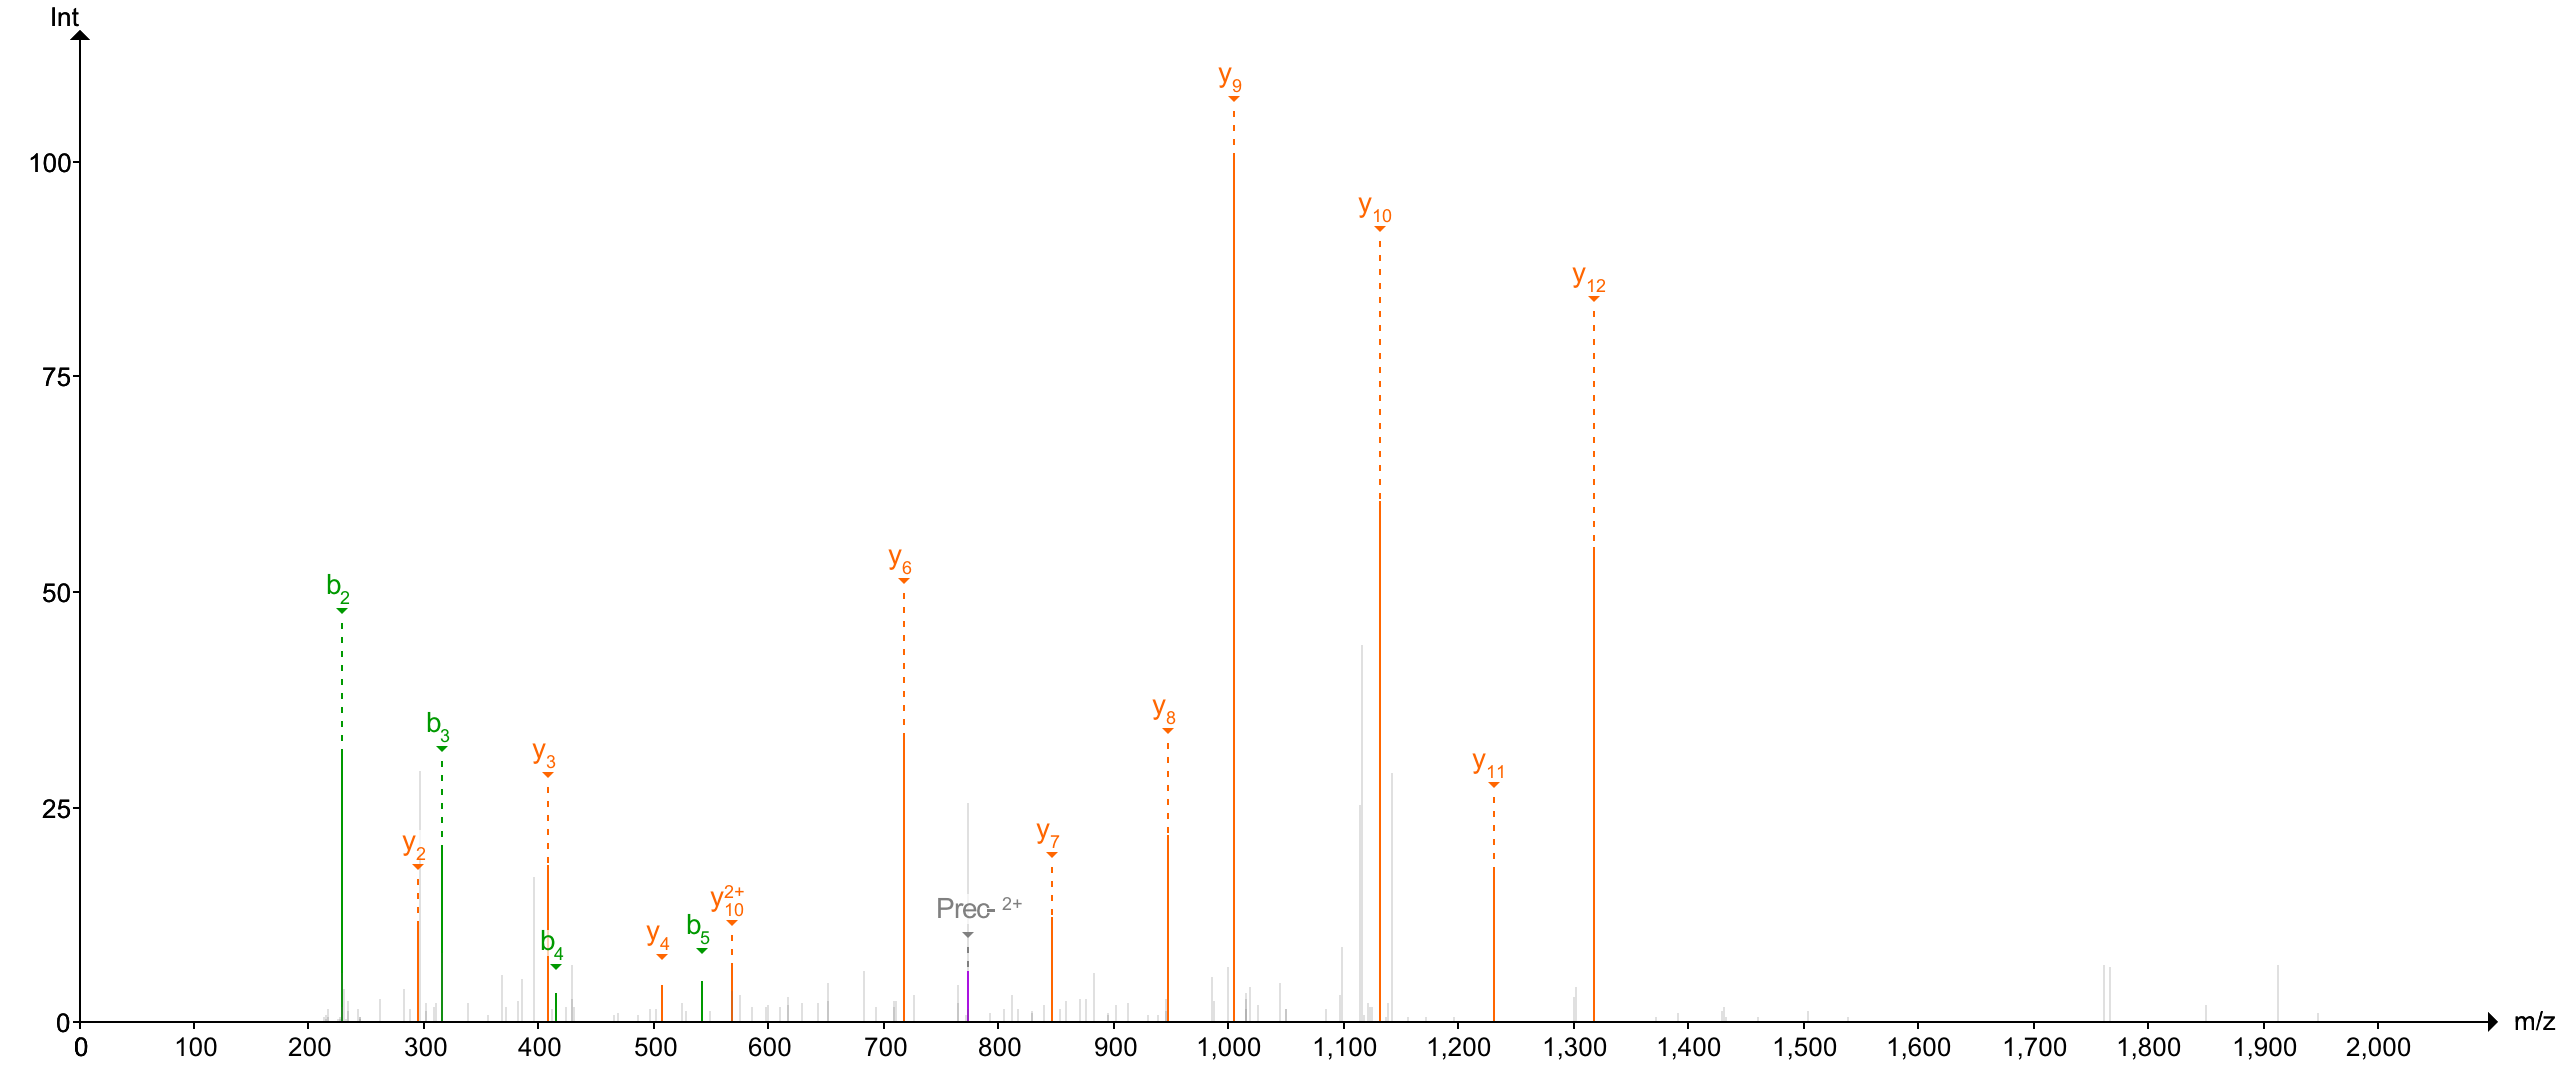

NH<sub>2</sub>-S L A A A L D I L N T A T R-COOH

b<sub>2</sub> b<sub>3</sub> b<sub>4</sub> b<sub>5</sub> b<sub>6</sub> b<sub>7</sub> y<sub>12</sub> y<sub>11</sub> y<sub>10</sub> y<sub>9</sub> y<sub>8</sub> y<sub>7</sub> y<sub>6</sub> y<sub>5</sub> y<sub>4</sub> y<sub>3</sub> y<sub>2</sub> y<sub>1</sub>

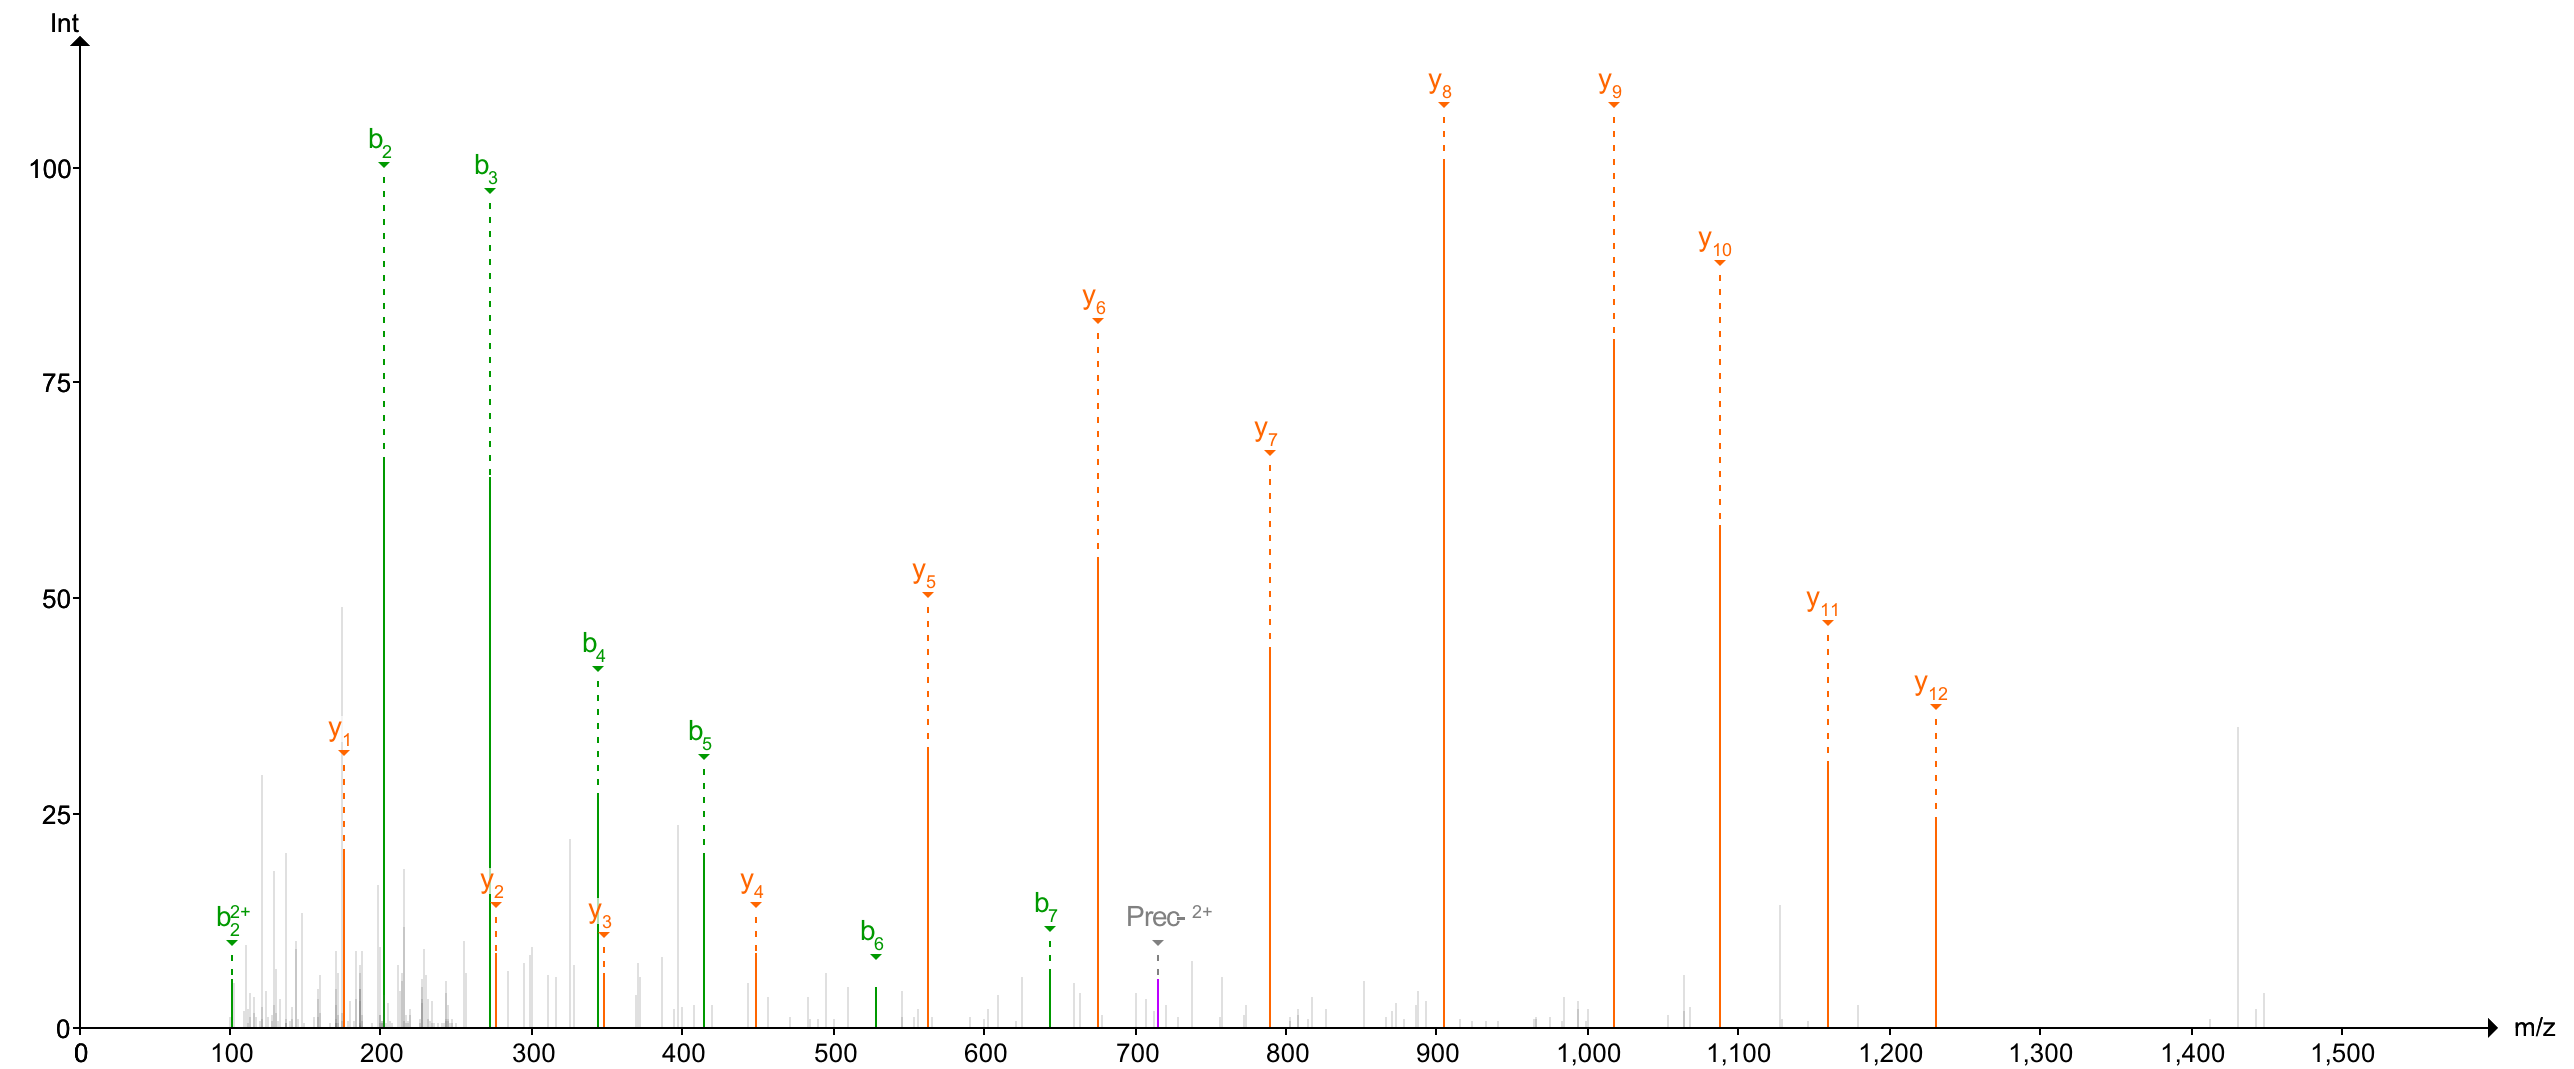



NH<sub>2</sub>-F D<sub>1</sub>N V<sub>1</sub>L<sub>1</sub>P V<sub>6</sub>S<sub>1</sub>L<sub>1</sub>A<sub>1</sub>F D<sub>1</sub>K-COOH

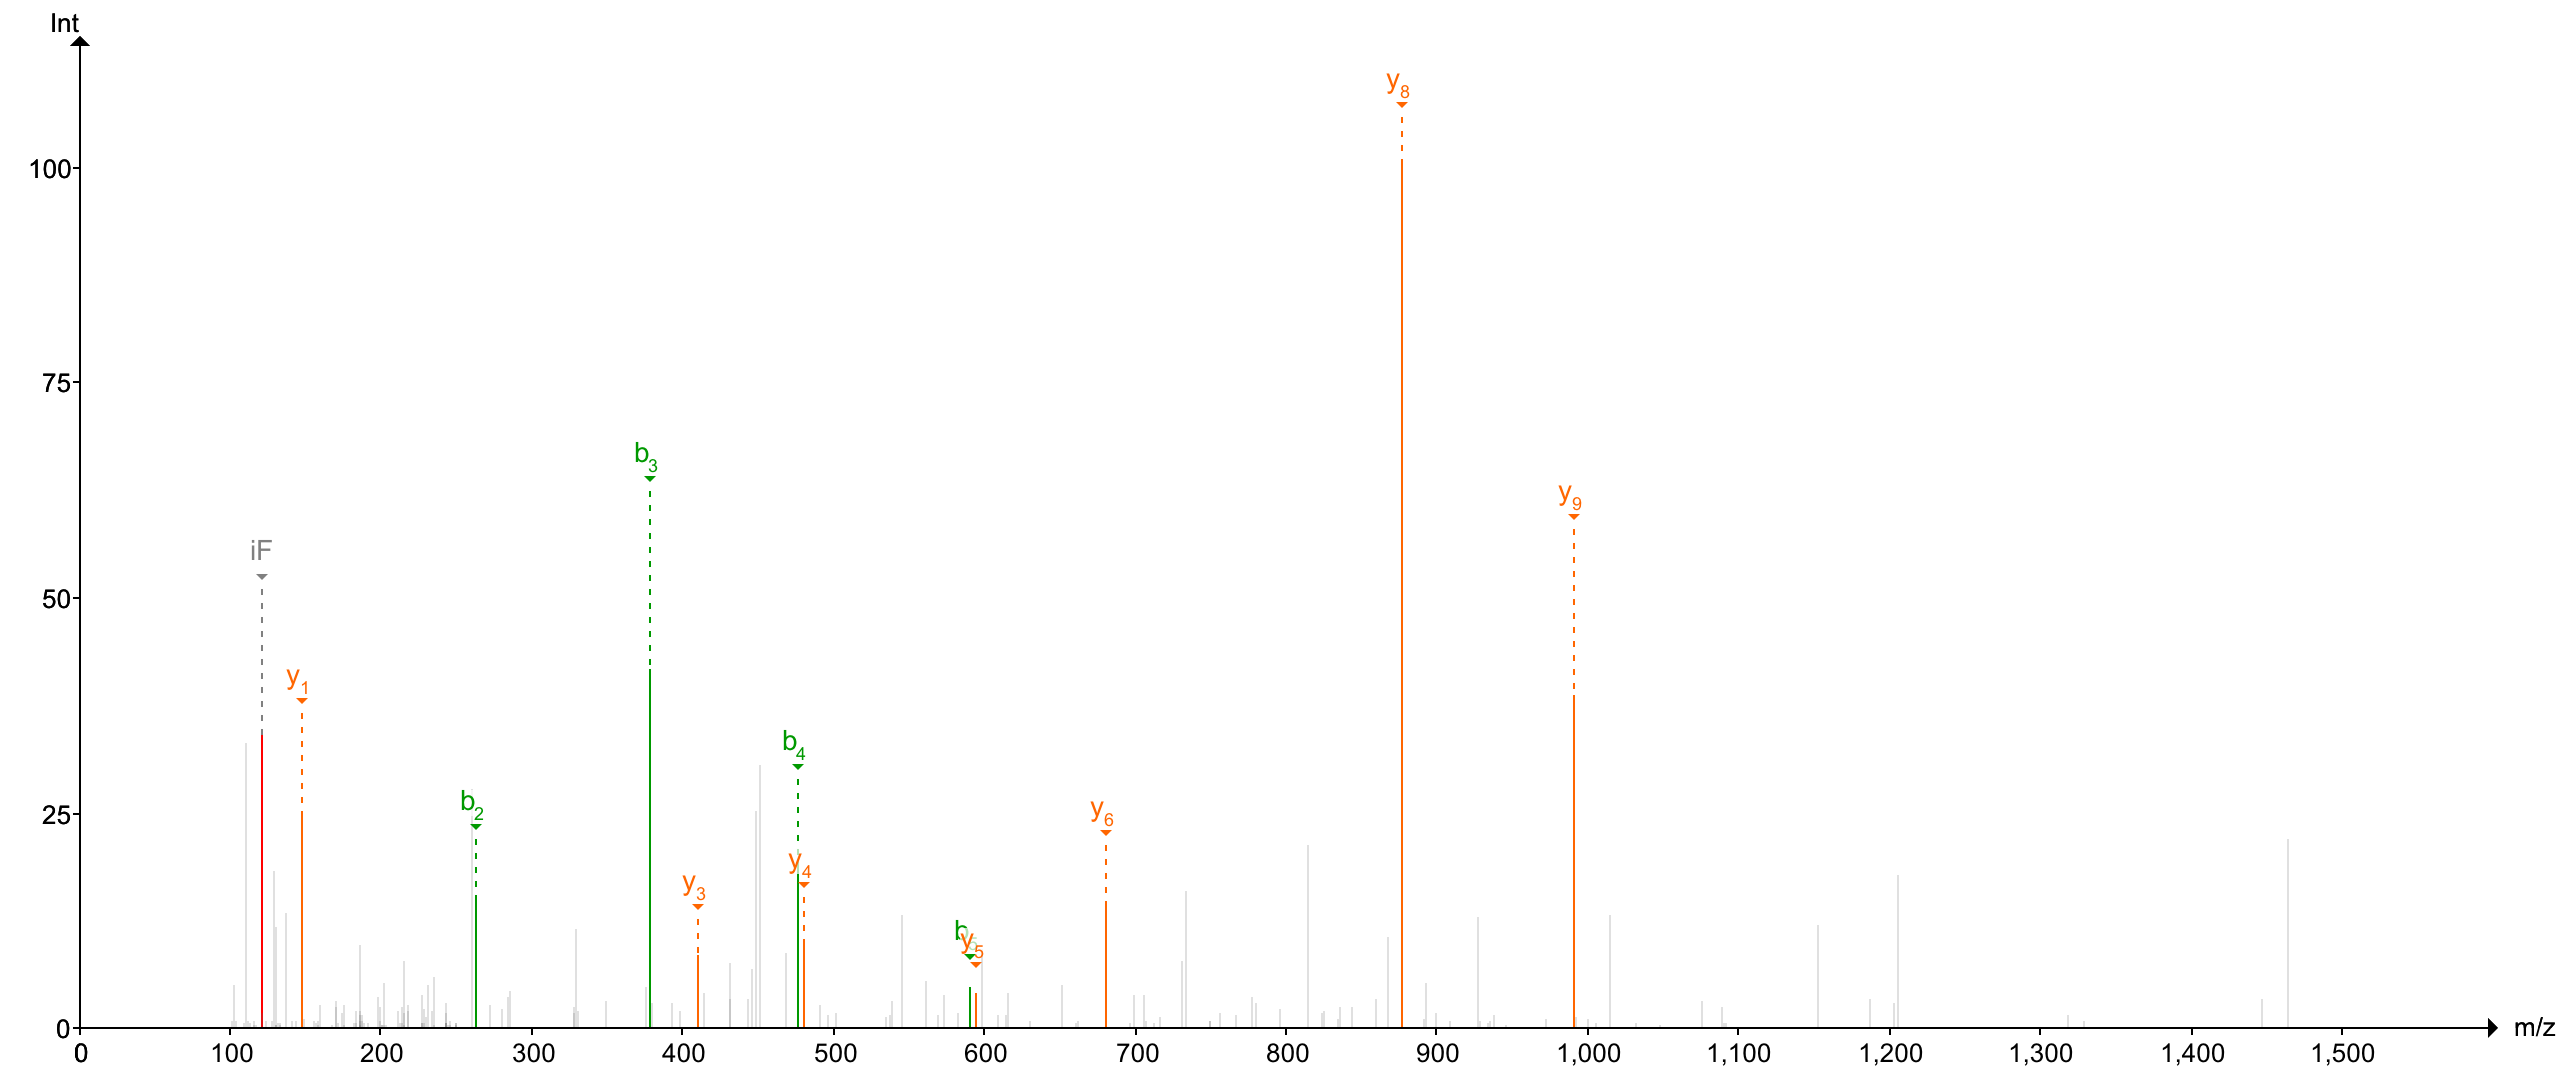



NH<sub>2</sub>-F L D G D E L T L A D N L L P K-COOH

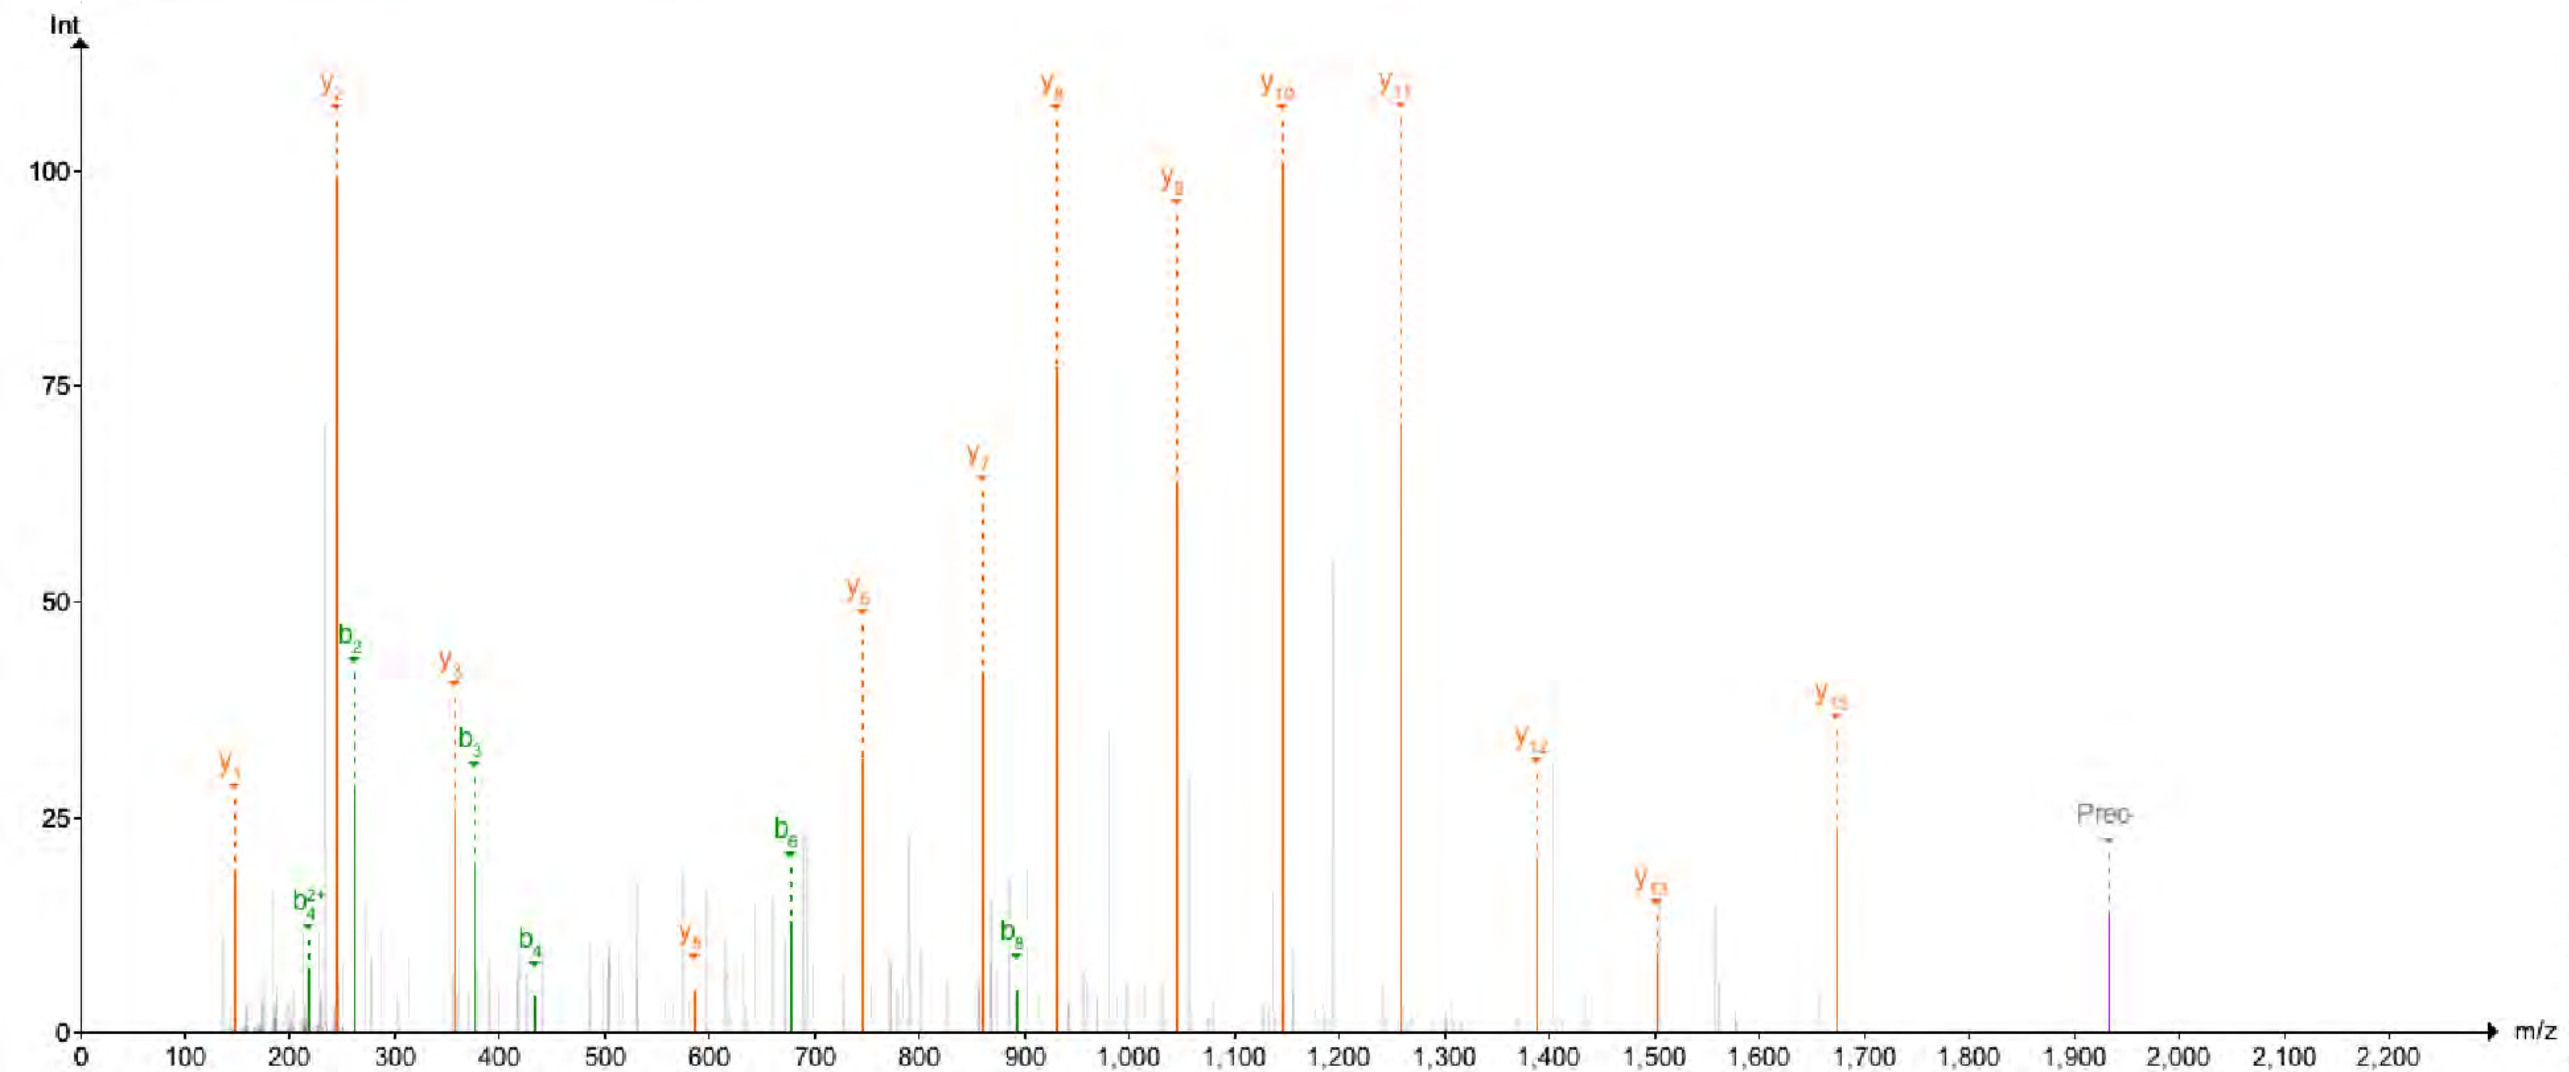

NH<sub>2</sub>-E<sub>1</sub>A<sub>1</sub>D<sub>1</sub>T<sub>1</sub>V<sub>1</sub>E<sub>1</sub>L<sub>1</sub>A<sub>1</sub>E<sub>1</sub>L<sub>1</sub>G<sub>1</sub>P<sub>1</sub>L<sub>1</sub>L<sub>1</sub>E<sub>1</sub>E<sub>1</sub>K-COOH

b<sub>1</sub> b<sub>2</sub> b<sub>3</sub> b<sub>4</sub> b<sub>5</sub> b<sub>6</sub> b<sub>7</sub> b<sub>8</sub> b<sub>9</sub>

y<sub>13</sub> y<sub>12</sub> y<sub>11</sub> y<sub>10</sub> y<sub>9</sub> y<sub>8</sub> y<sub>7</sub> y<sub>6</sub>

y<sub>4</sub> y<sub>3</sub> y<sub>2</sub> y<sub>1</sub>

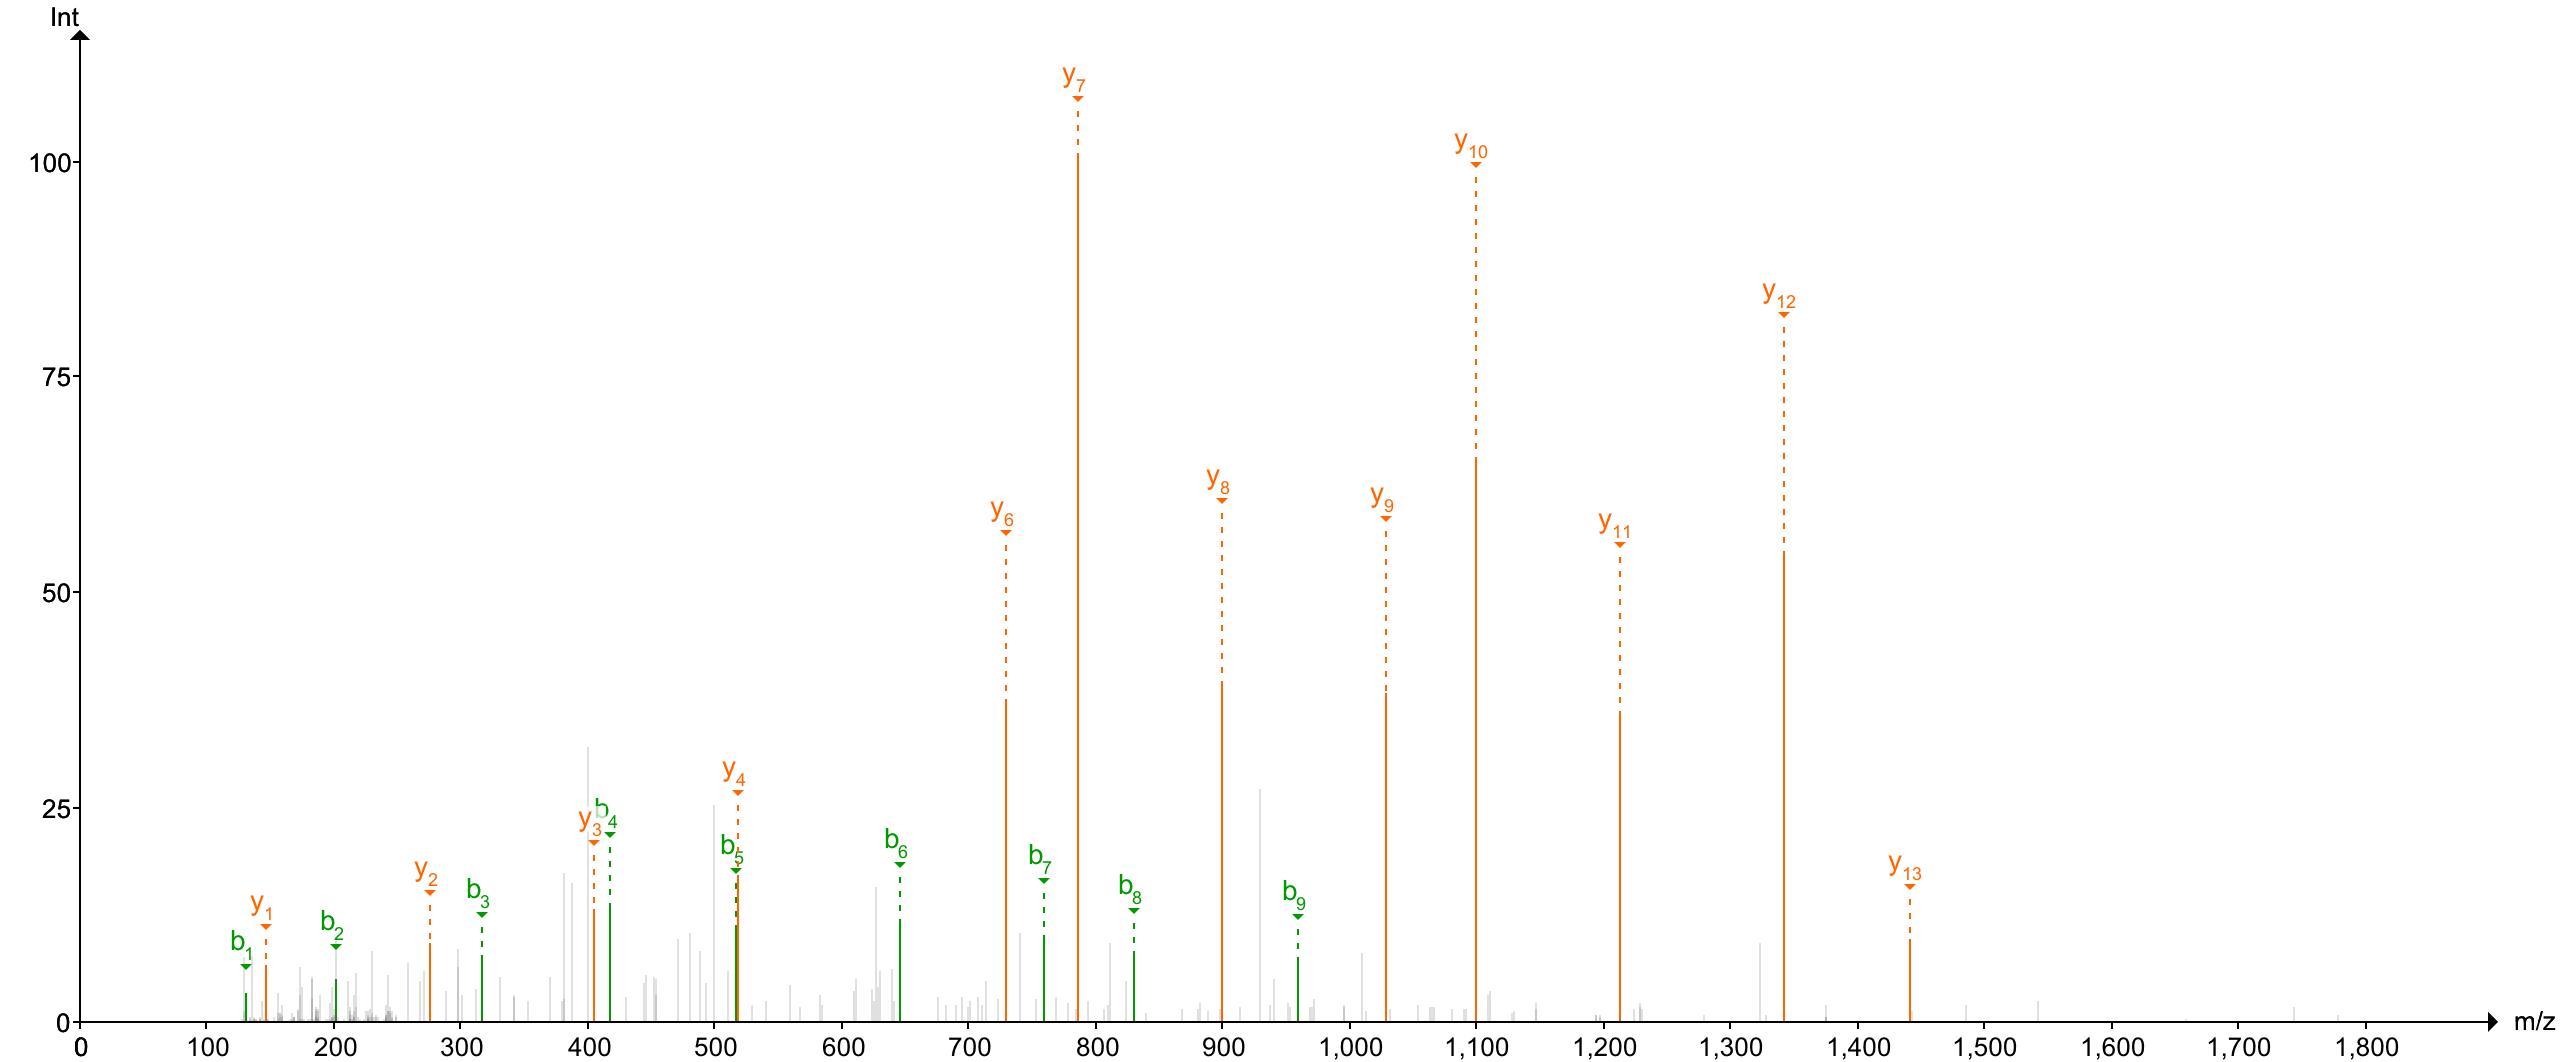

NH<sub>2</sub>-S L L L G E L P I D S P A L V R-COOH

b<sub>2</sub>

b<sub>5</sub>

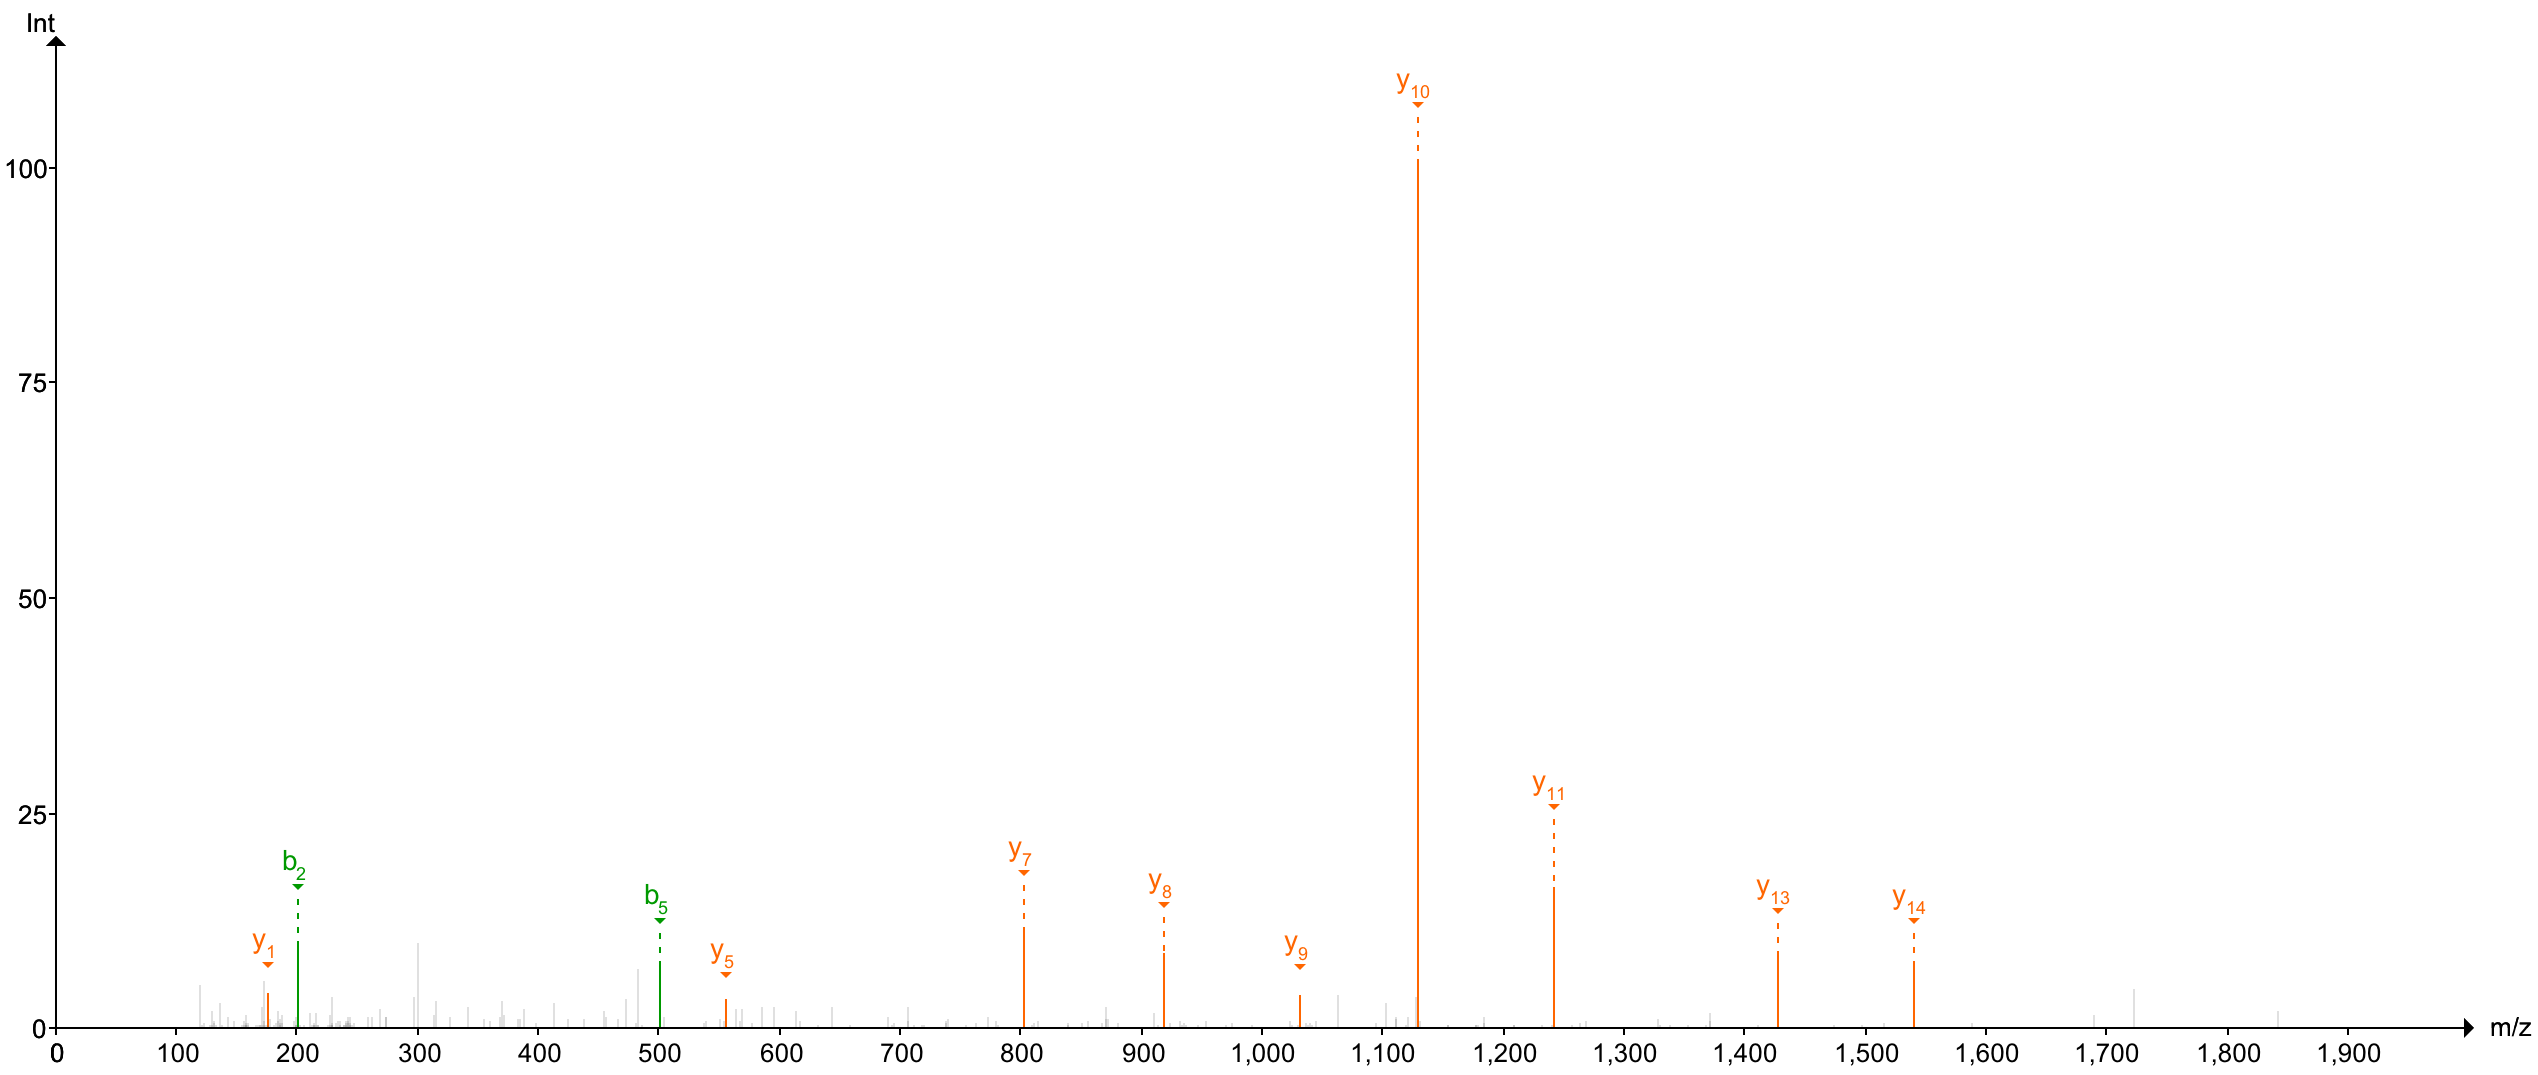



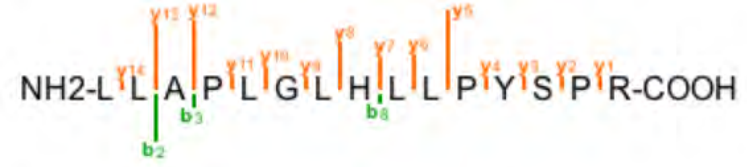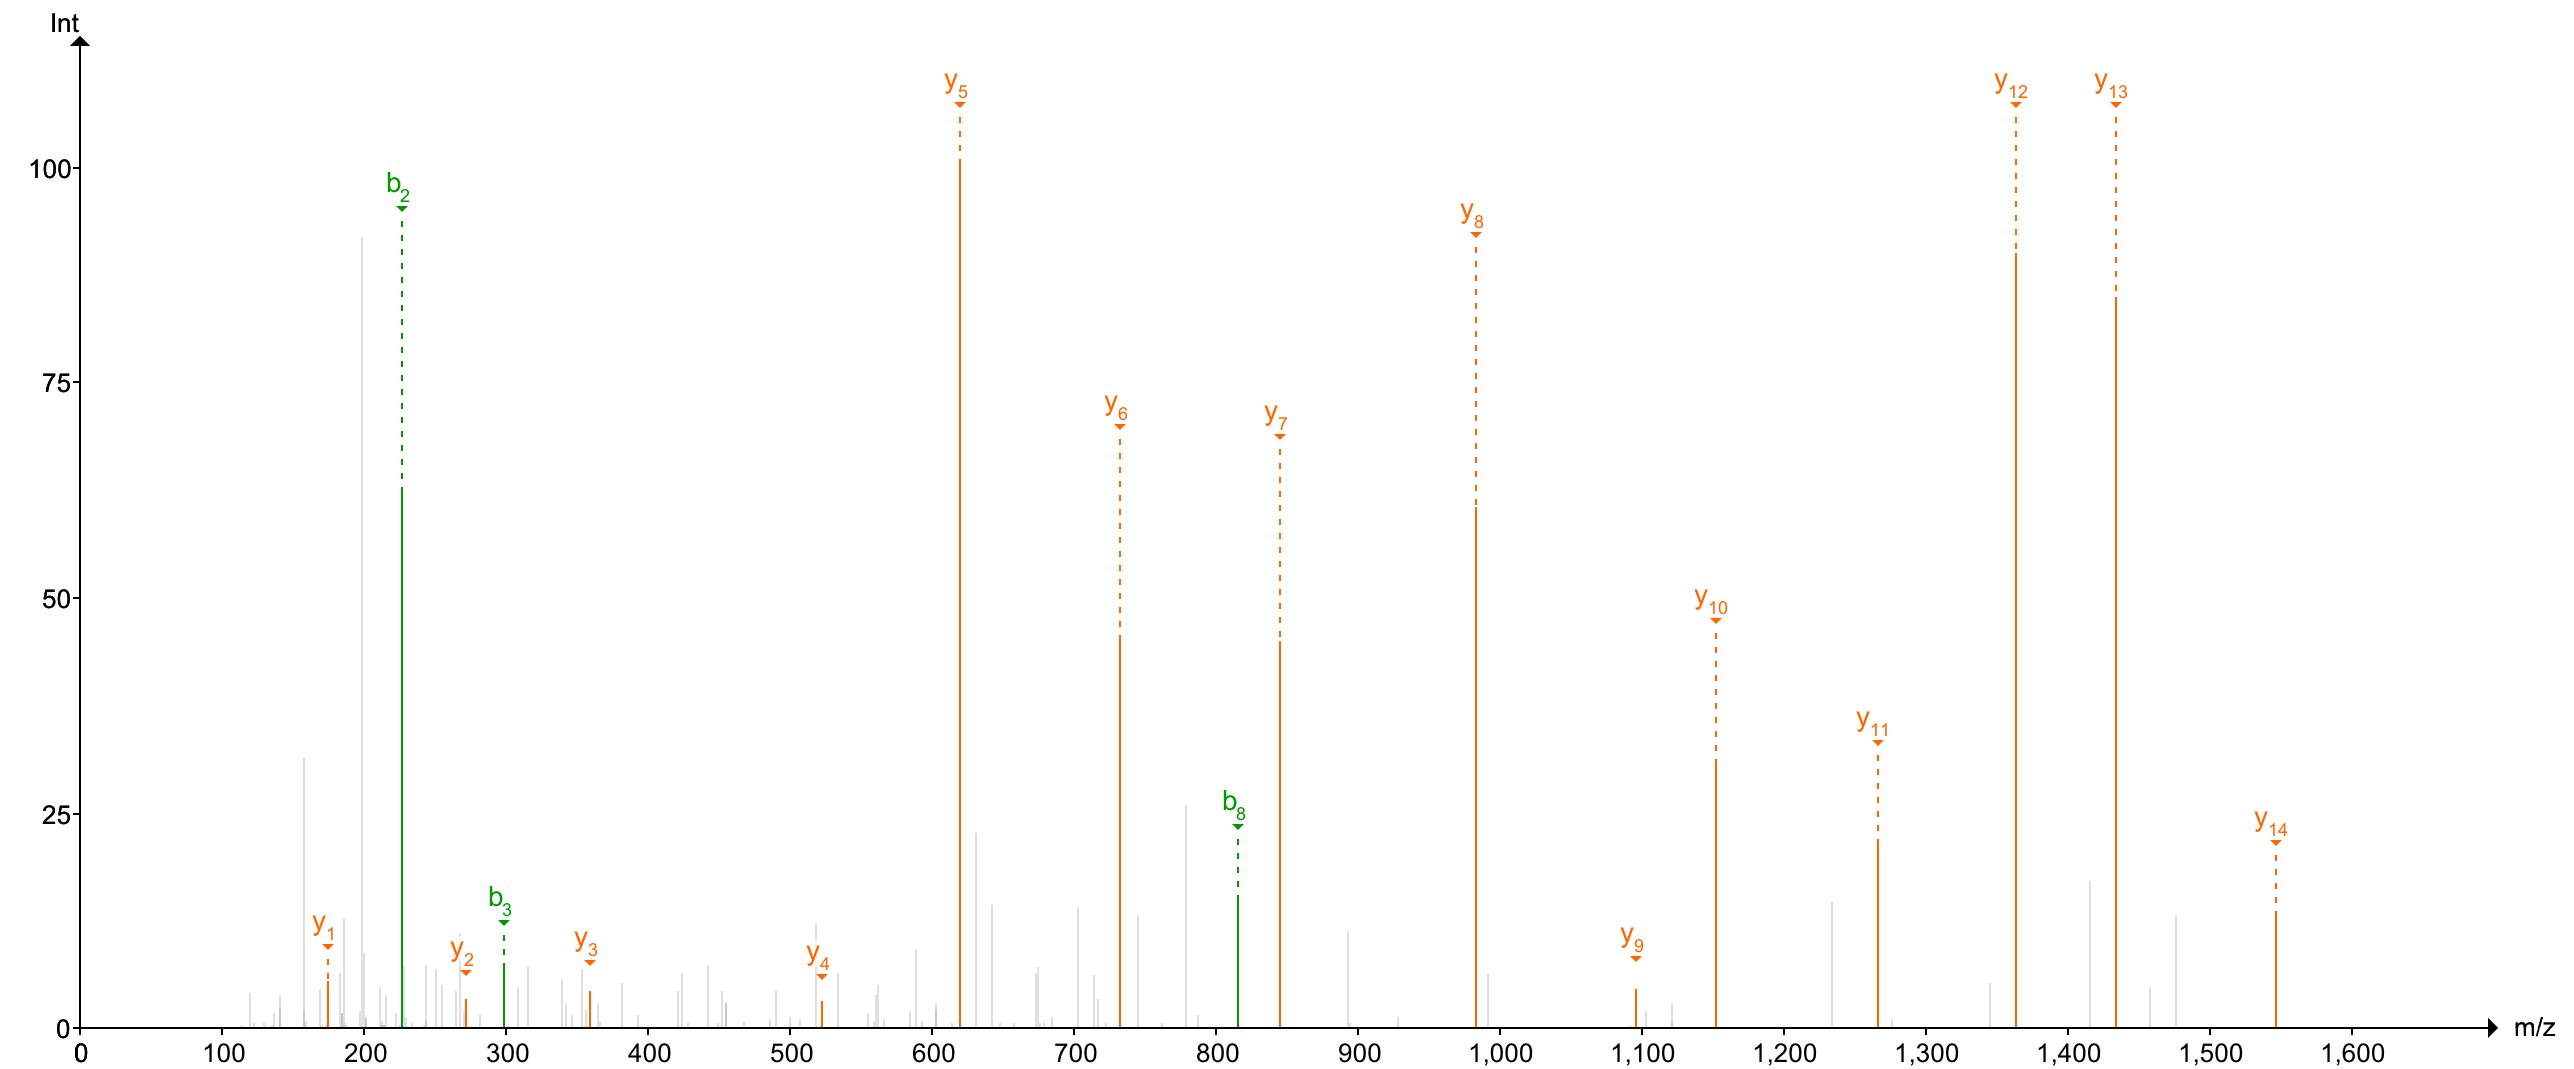

NH<sub>2</sub>-L D<sub>1</sub> V<sub>2</sub> A<sub>3</sub> T<sub>4</sub> D<sub>5</sub> N<sub>6</sub> F<sub>7</sub> F<sub>8</sub> Q<sub>9</sub> N<sub>10</sub> P E<sub>11</sub> L<sub>12</sub> Y<sub>13</sub> I<sub>14</sub> R-COOH

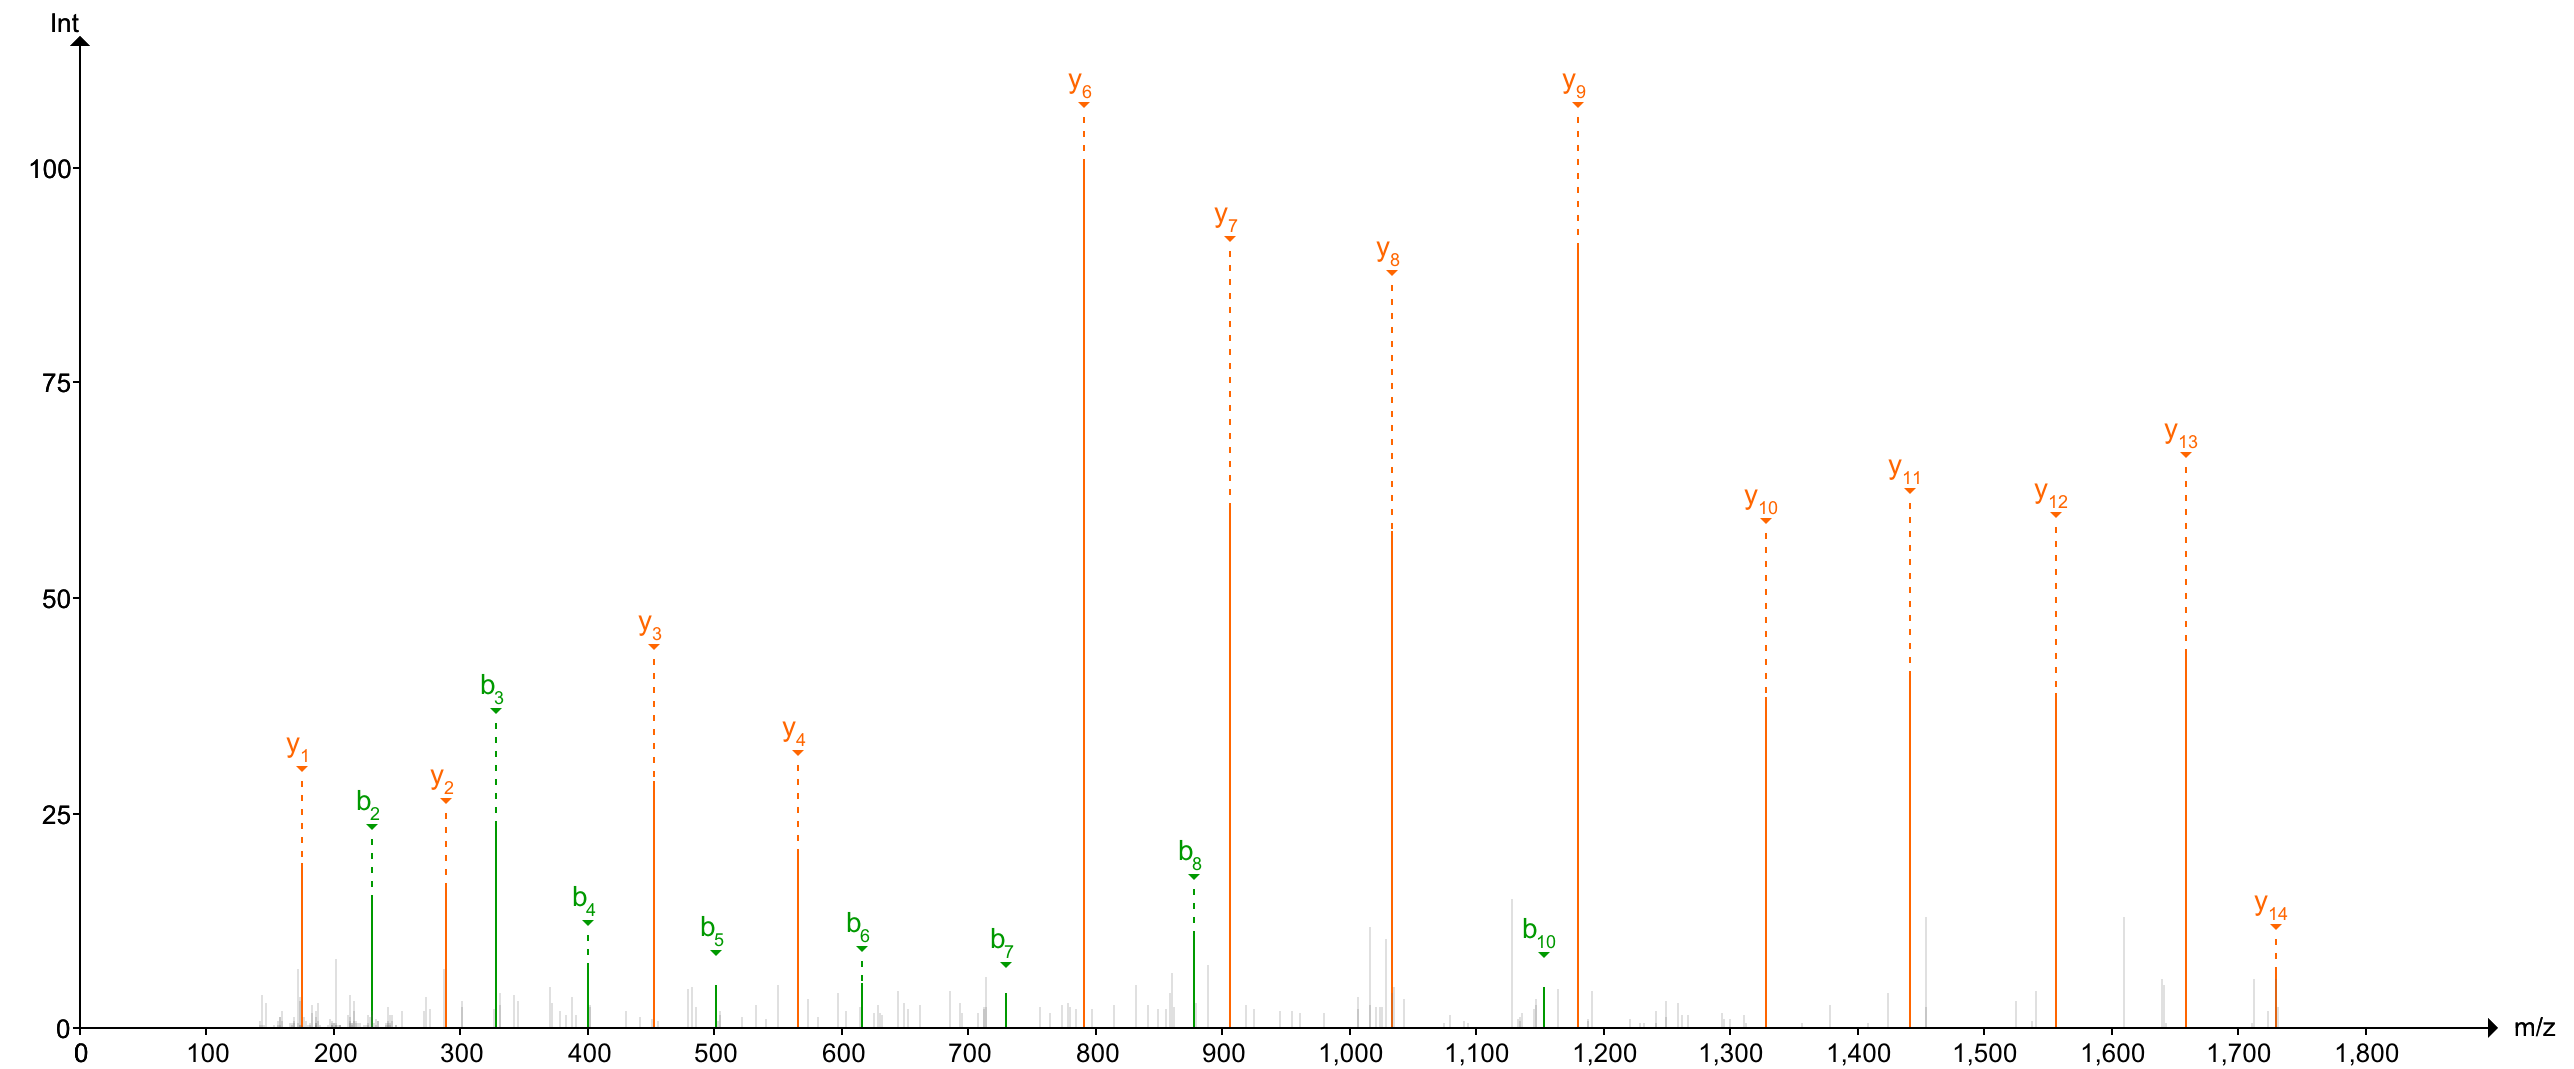

NH<sub>2</sub>-L I Q Q F L T L R P D Q Q L H I F N T L R-COOH

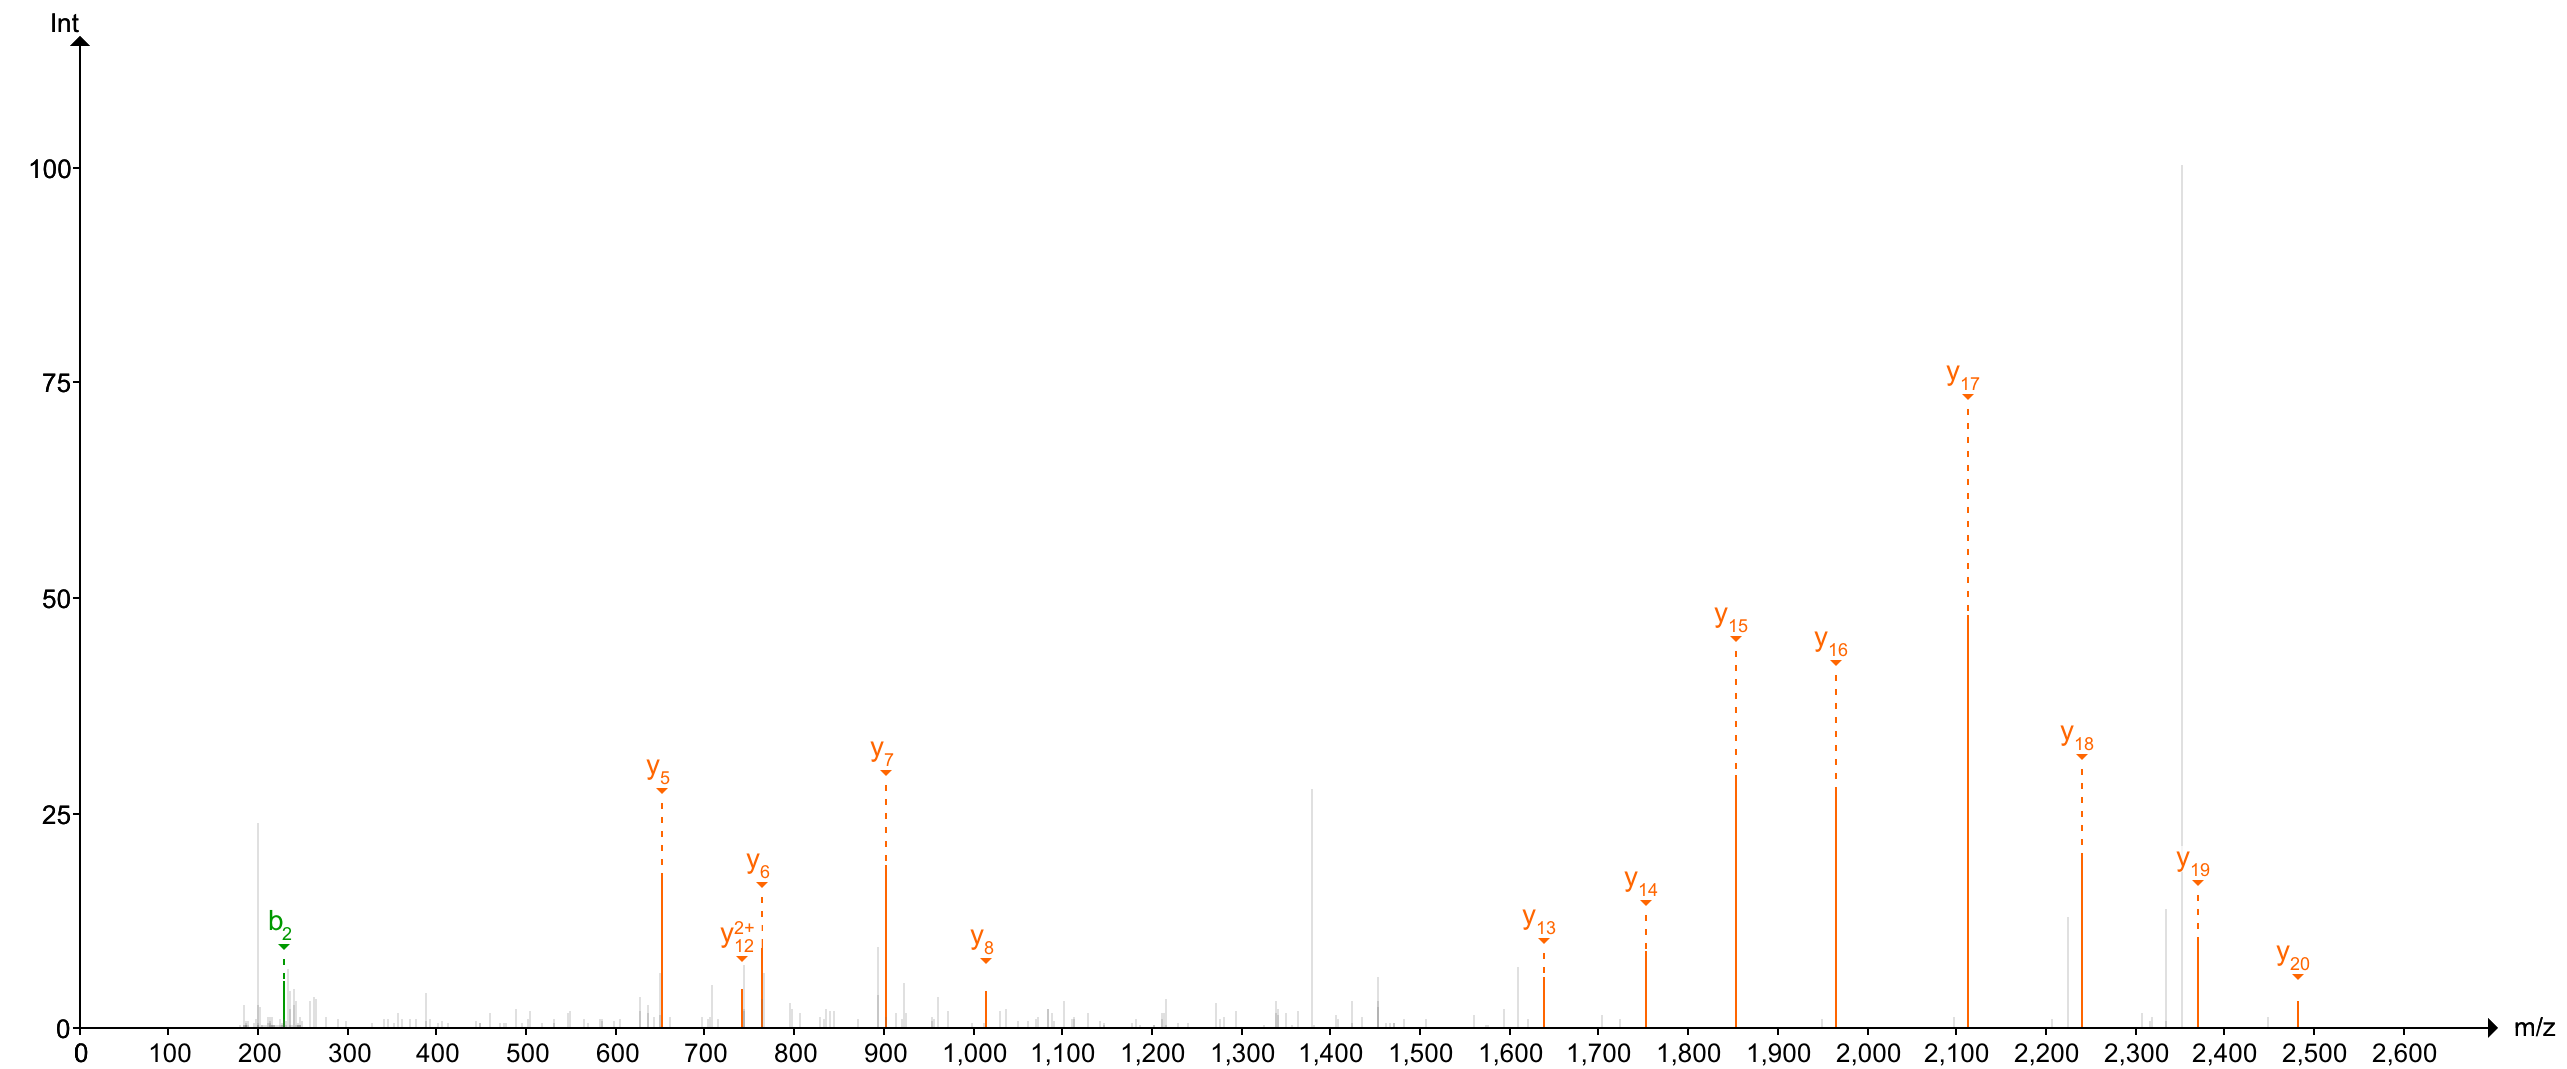

NH<sub>2</sub>-L I I P V A E G I M N E I W L R-COOH

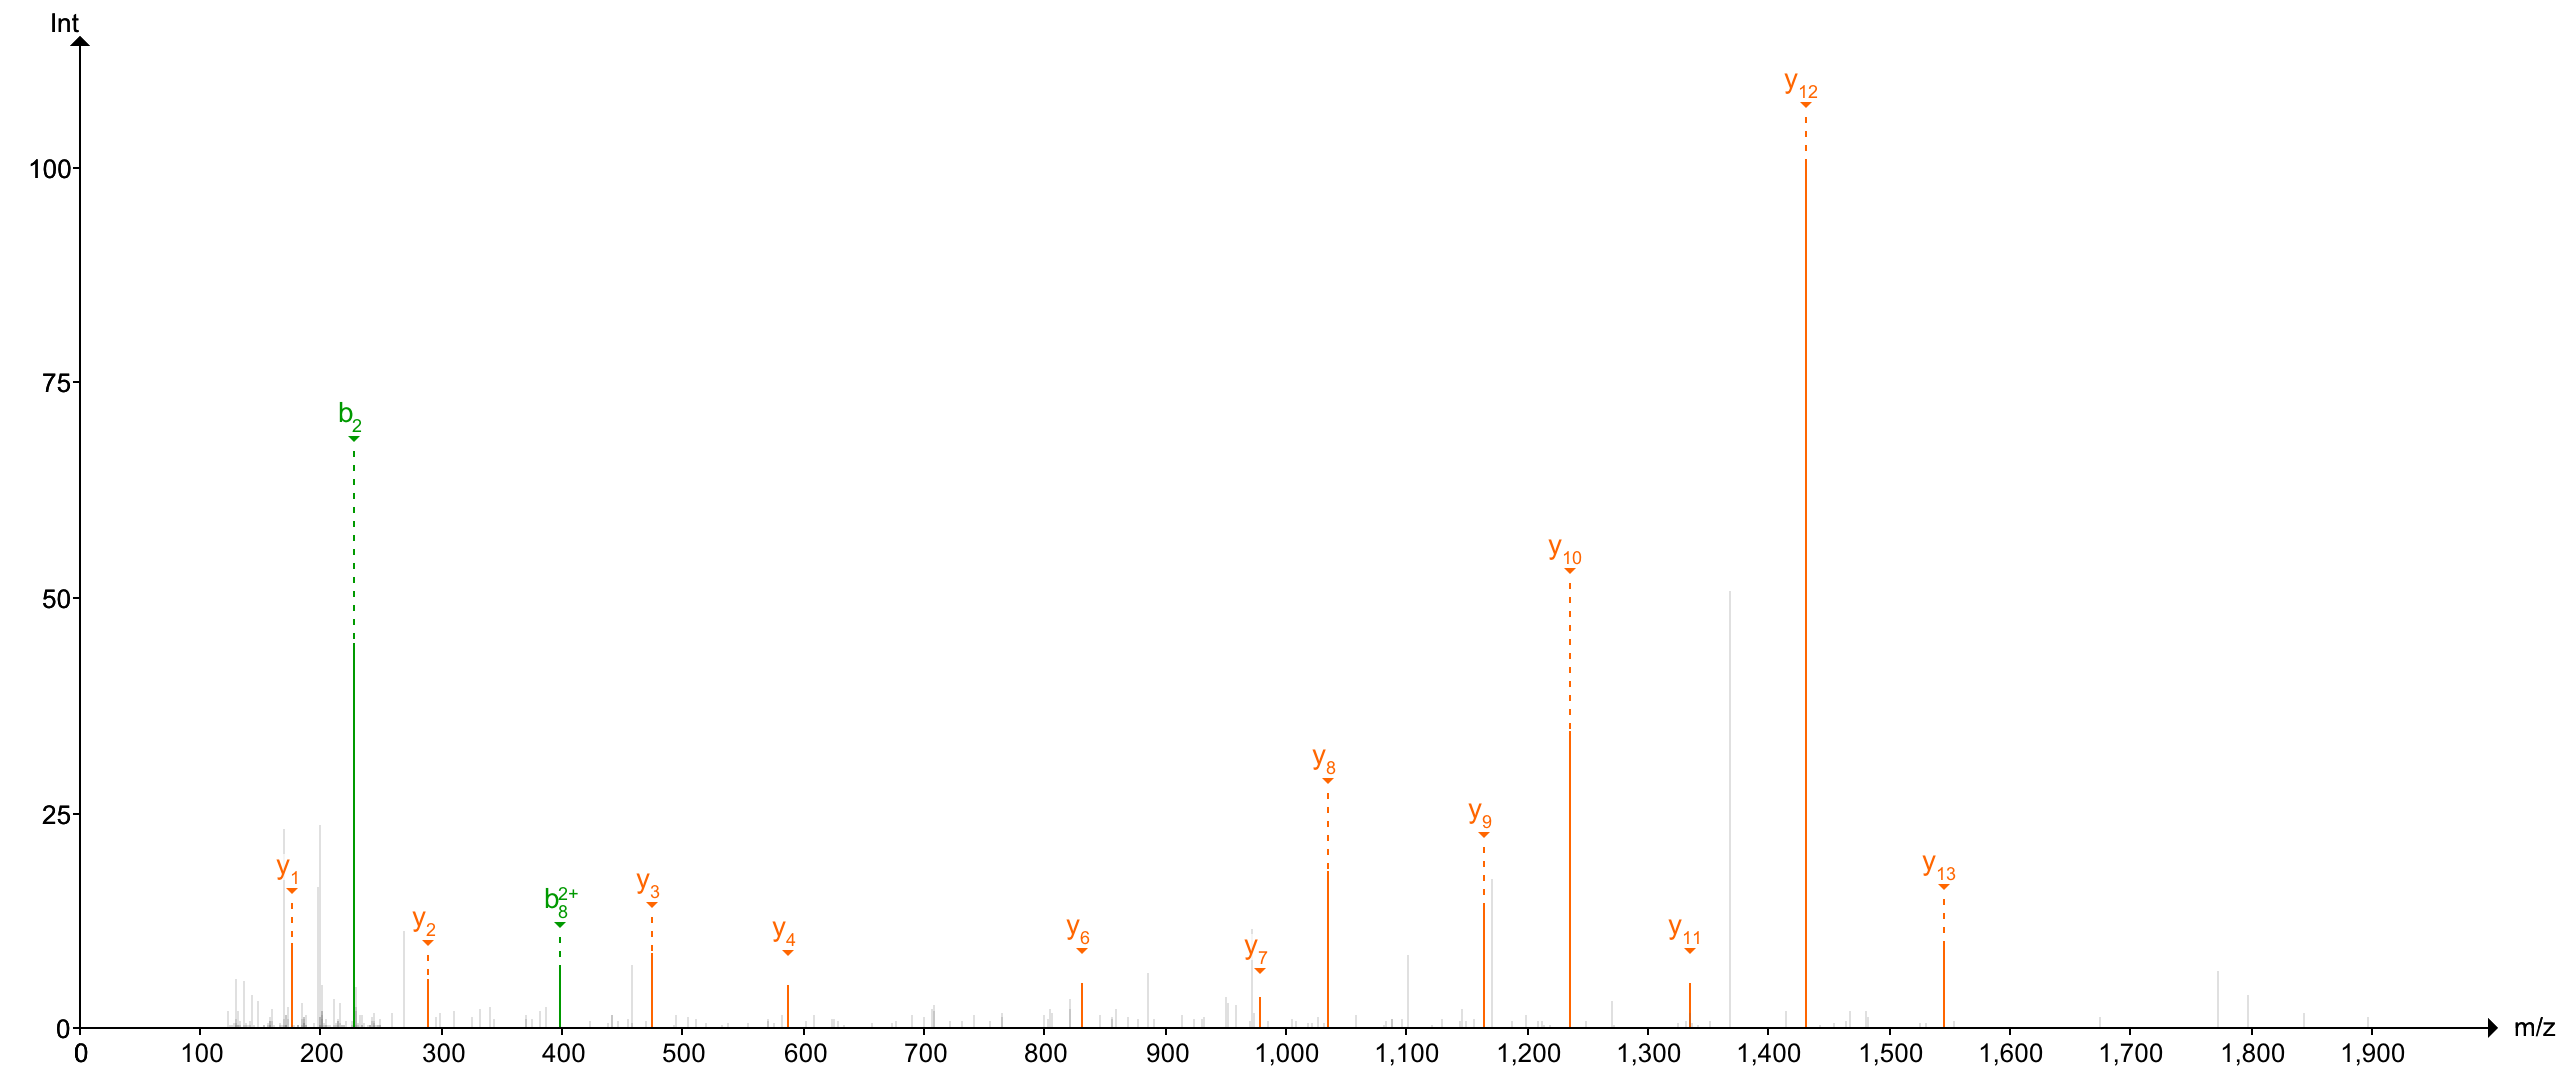



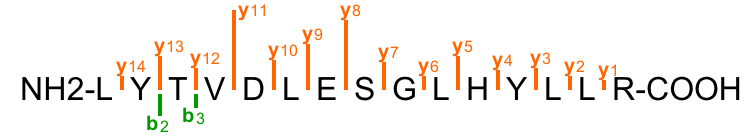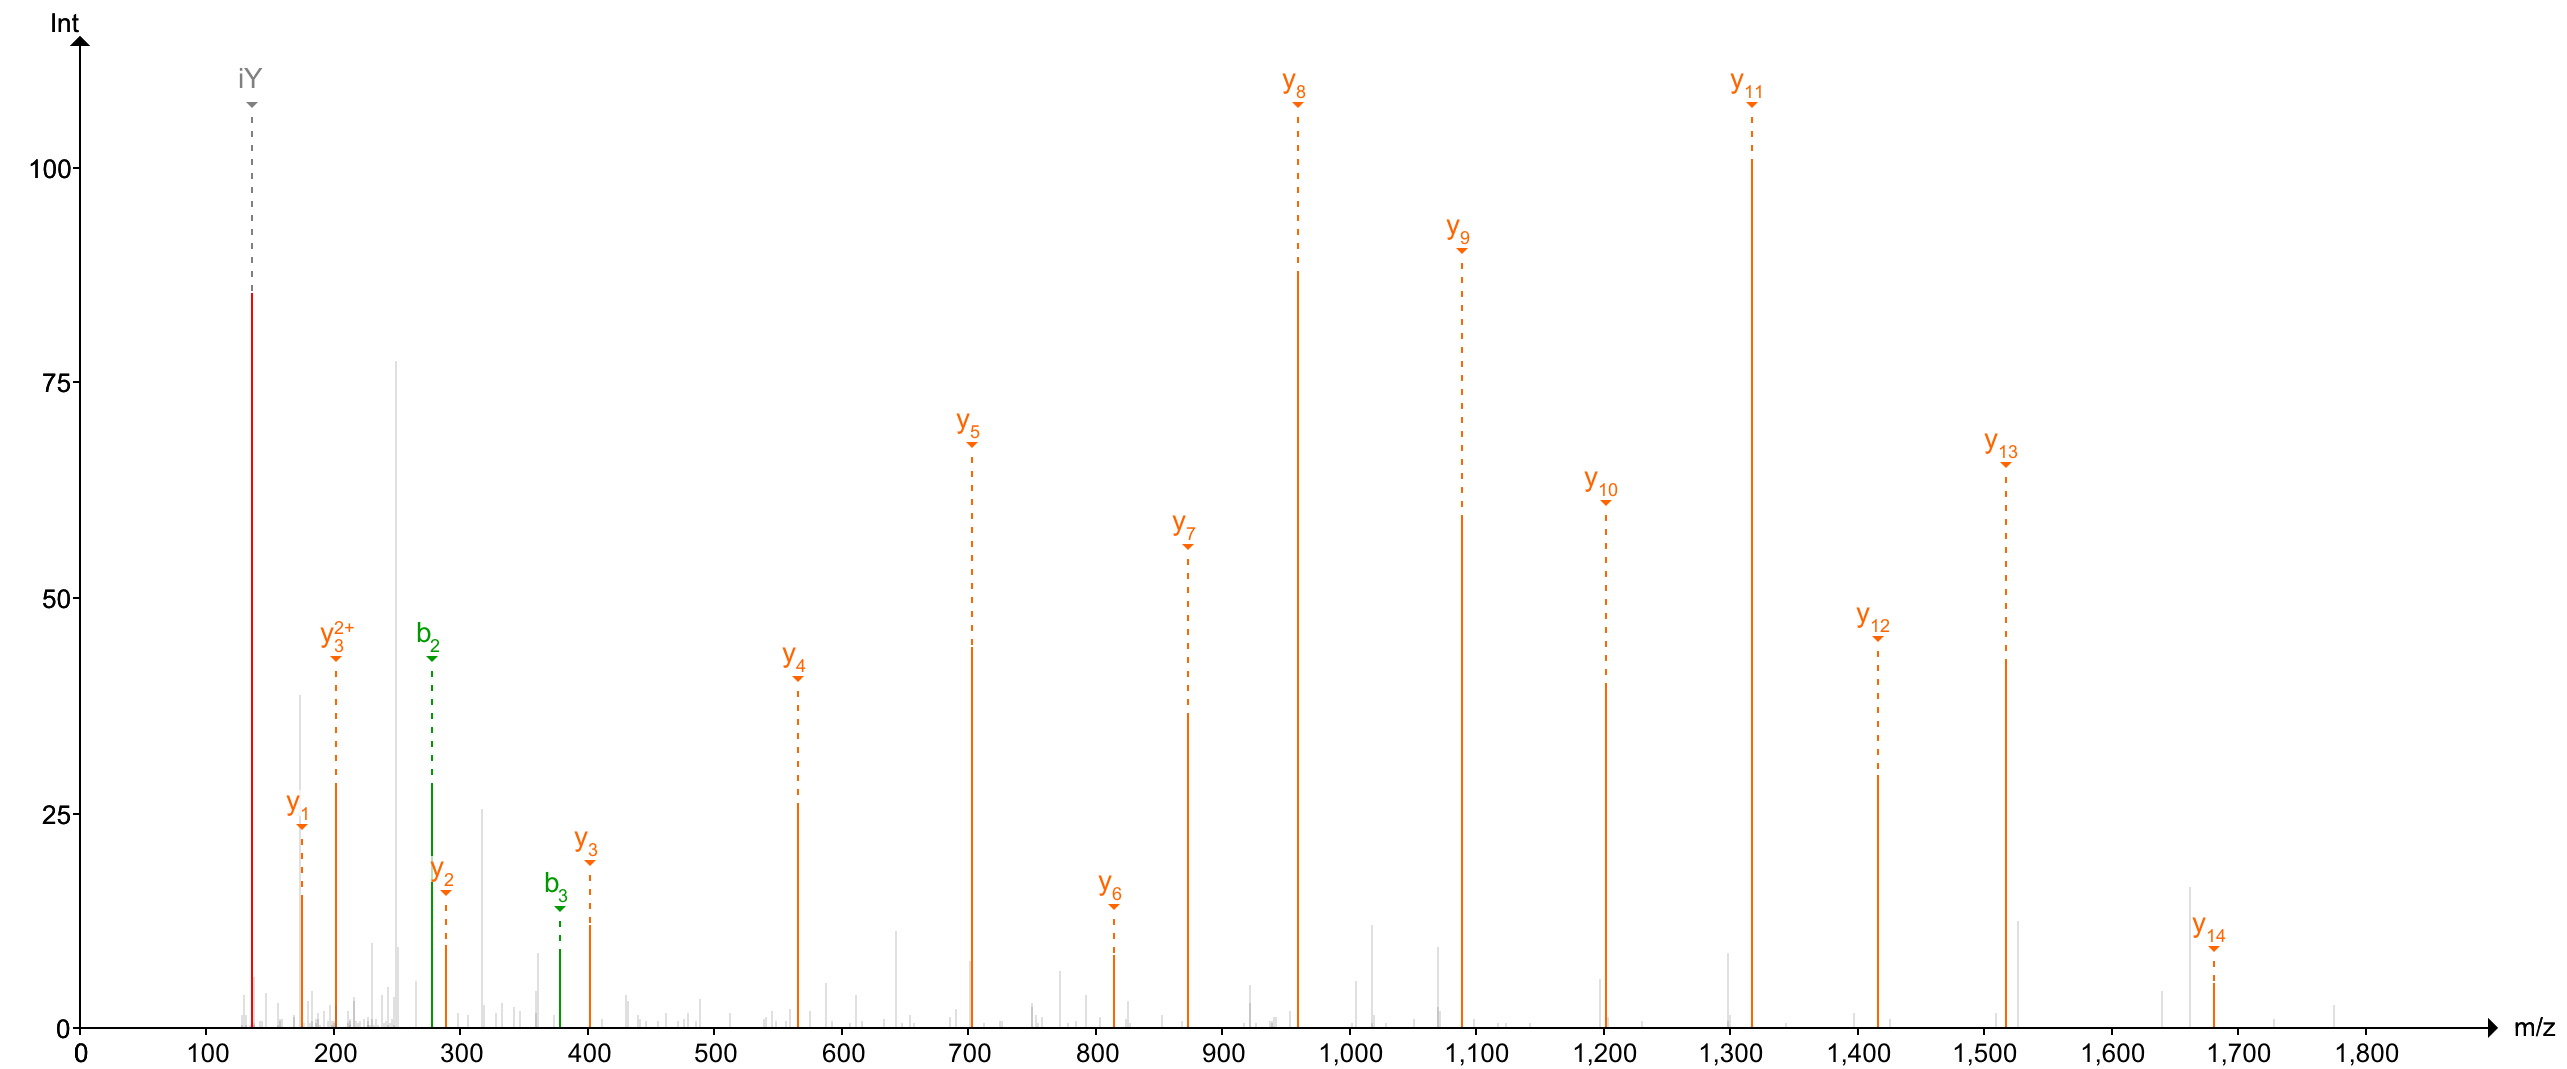

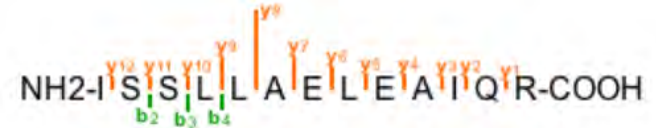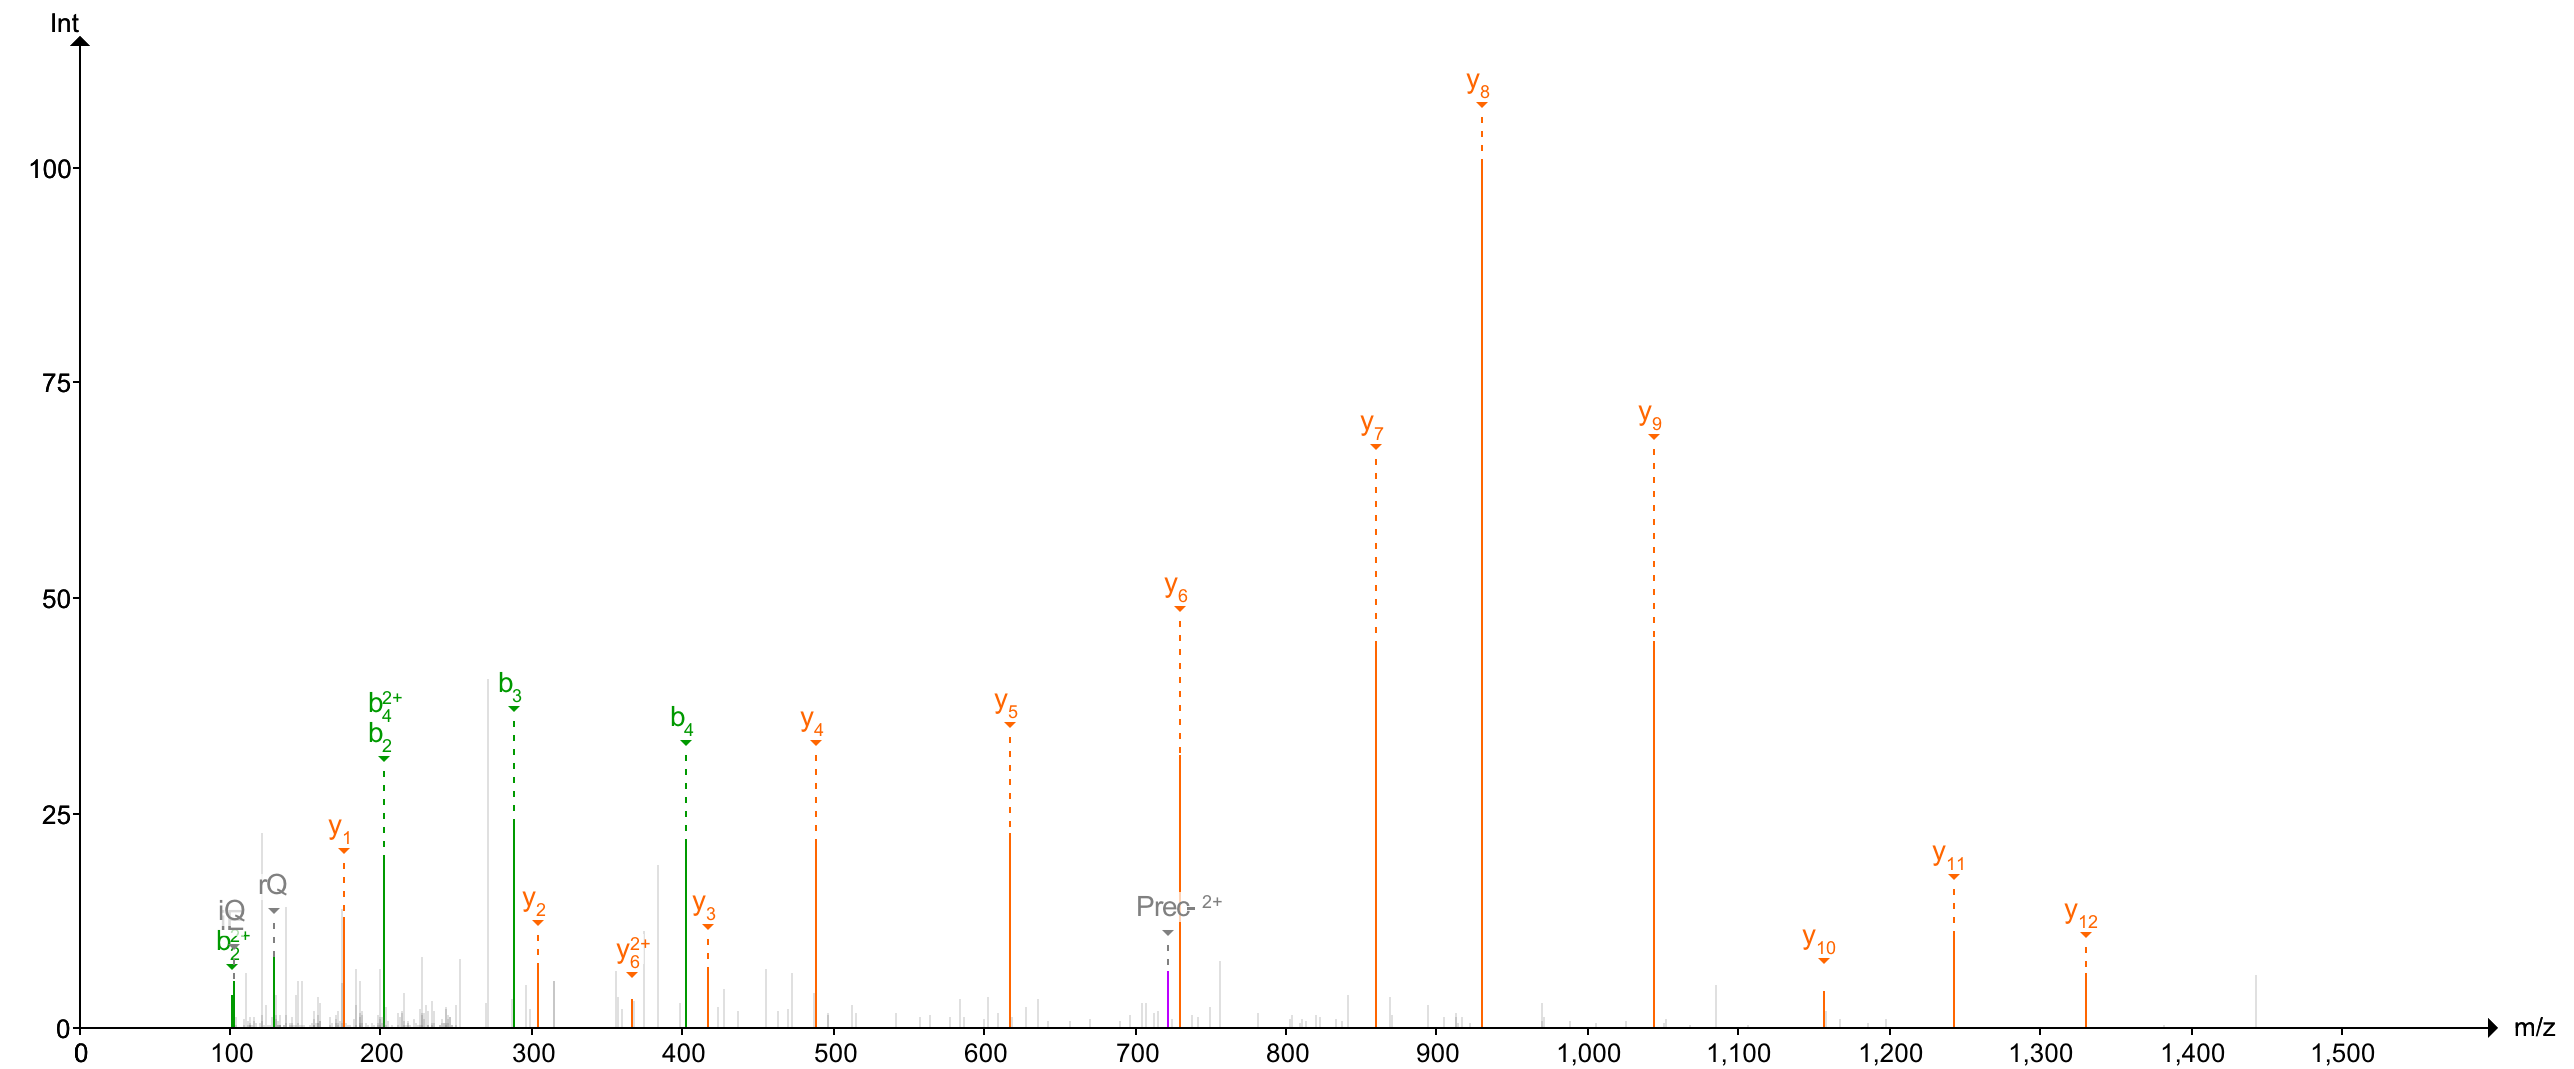

NH<sub>2</sub>-T<sub>17</sub>P<sub>15</sub>L<sub>14</sub>L<sub>13</sub>D<sub>12</sub>D<sub>11</sub>P<sub>10</sub>V<sub>9</sub>F<sub>8</sub>I<sub>7</sub>H<sub>6</sub>P<sub>5</sub>S<sub>4</sub>S<sub>3</sub>V<sub>2</sub>L<sub>1</sub>F<sub>1</sub>K-COOH

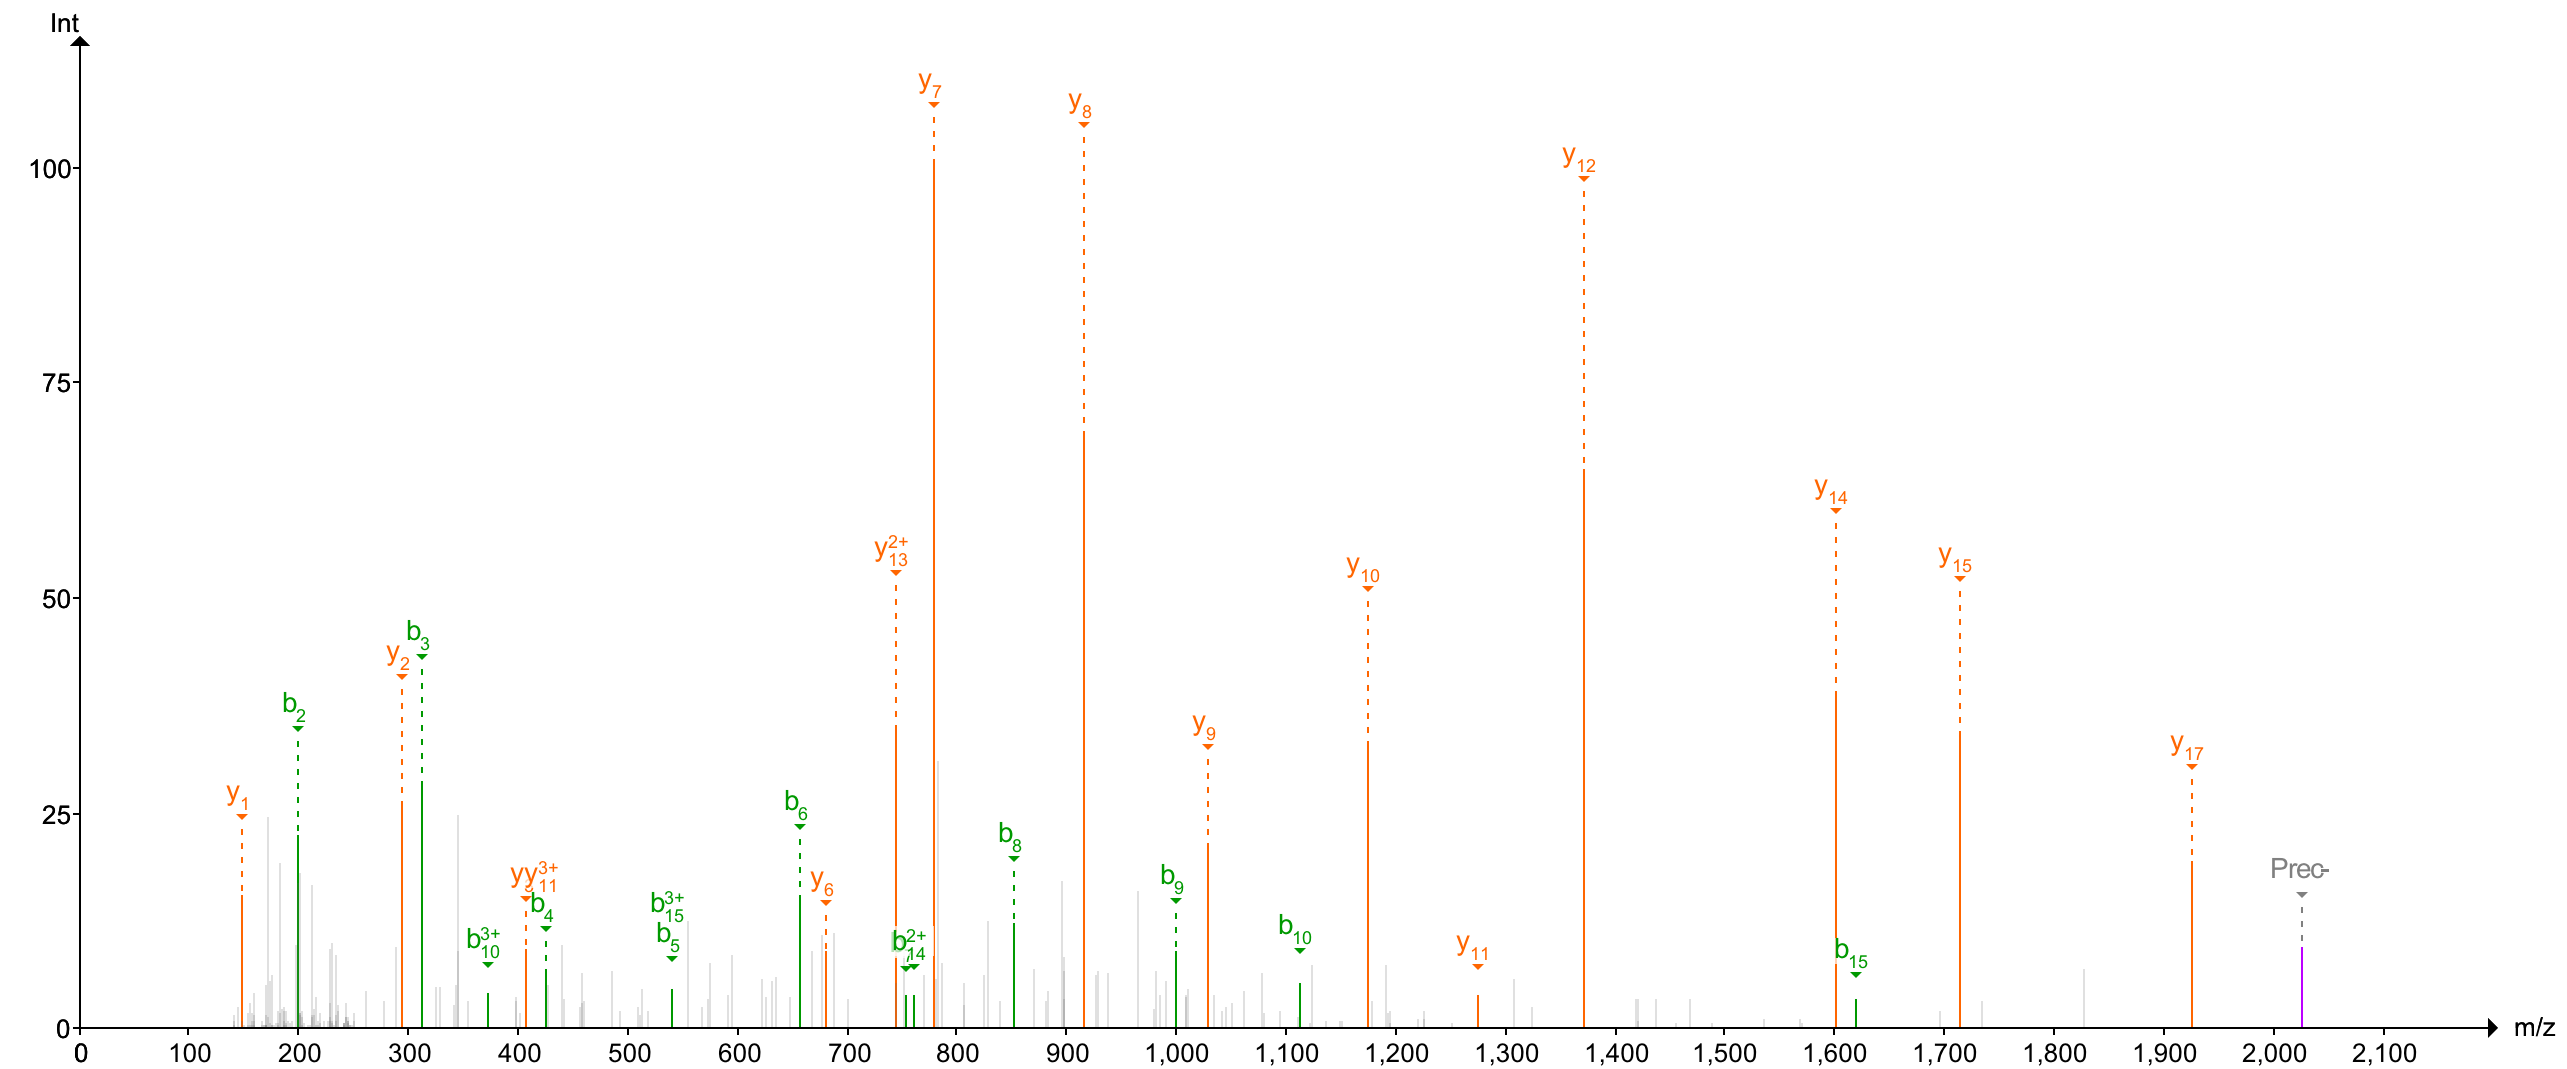

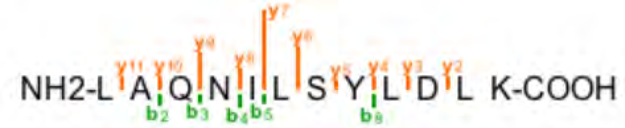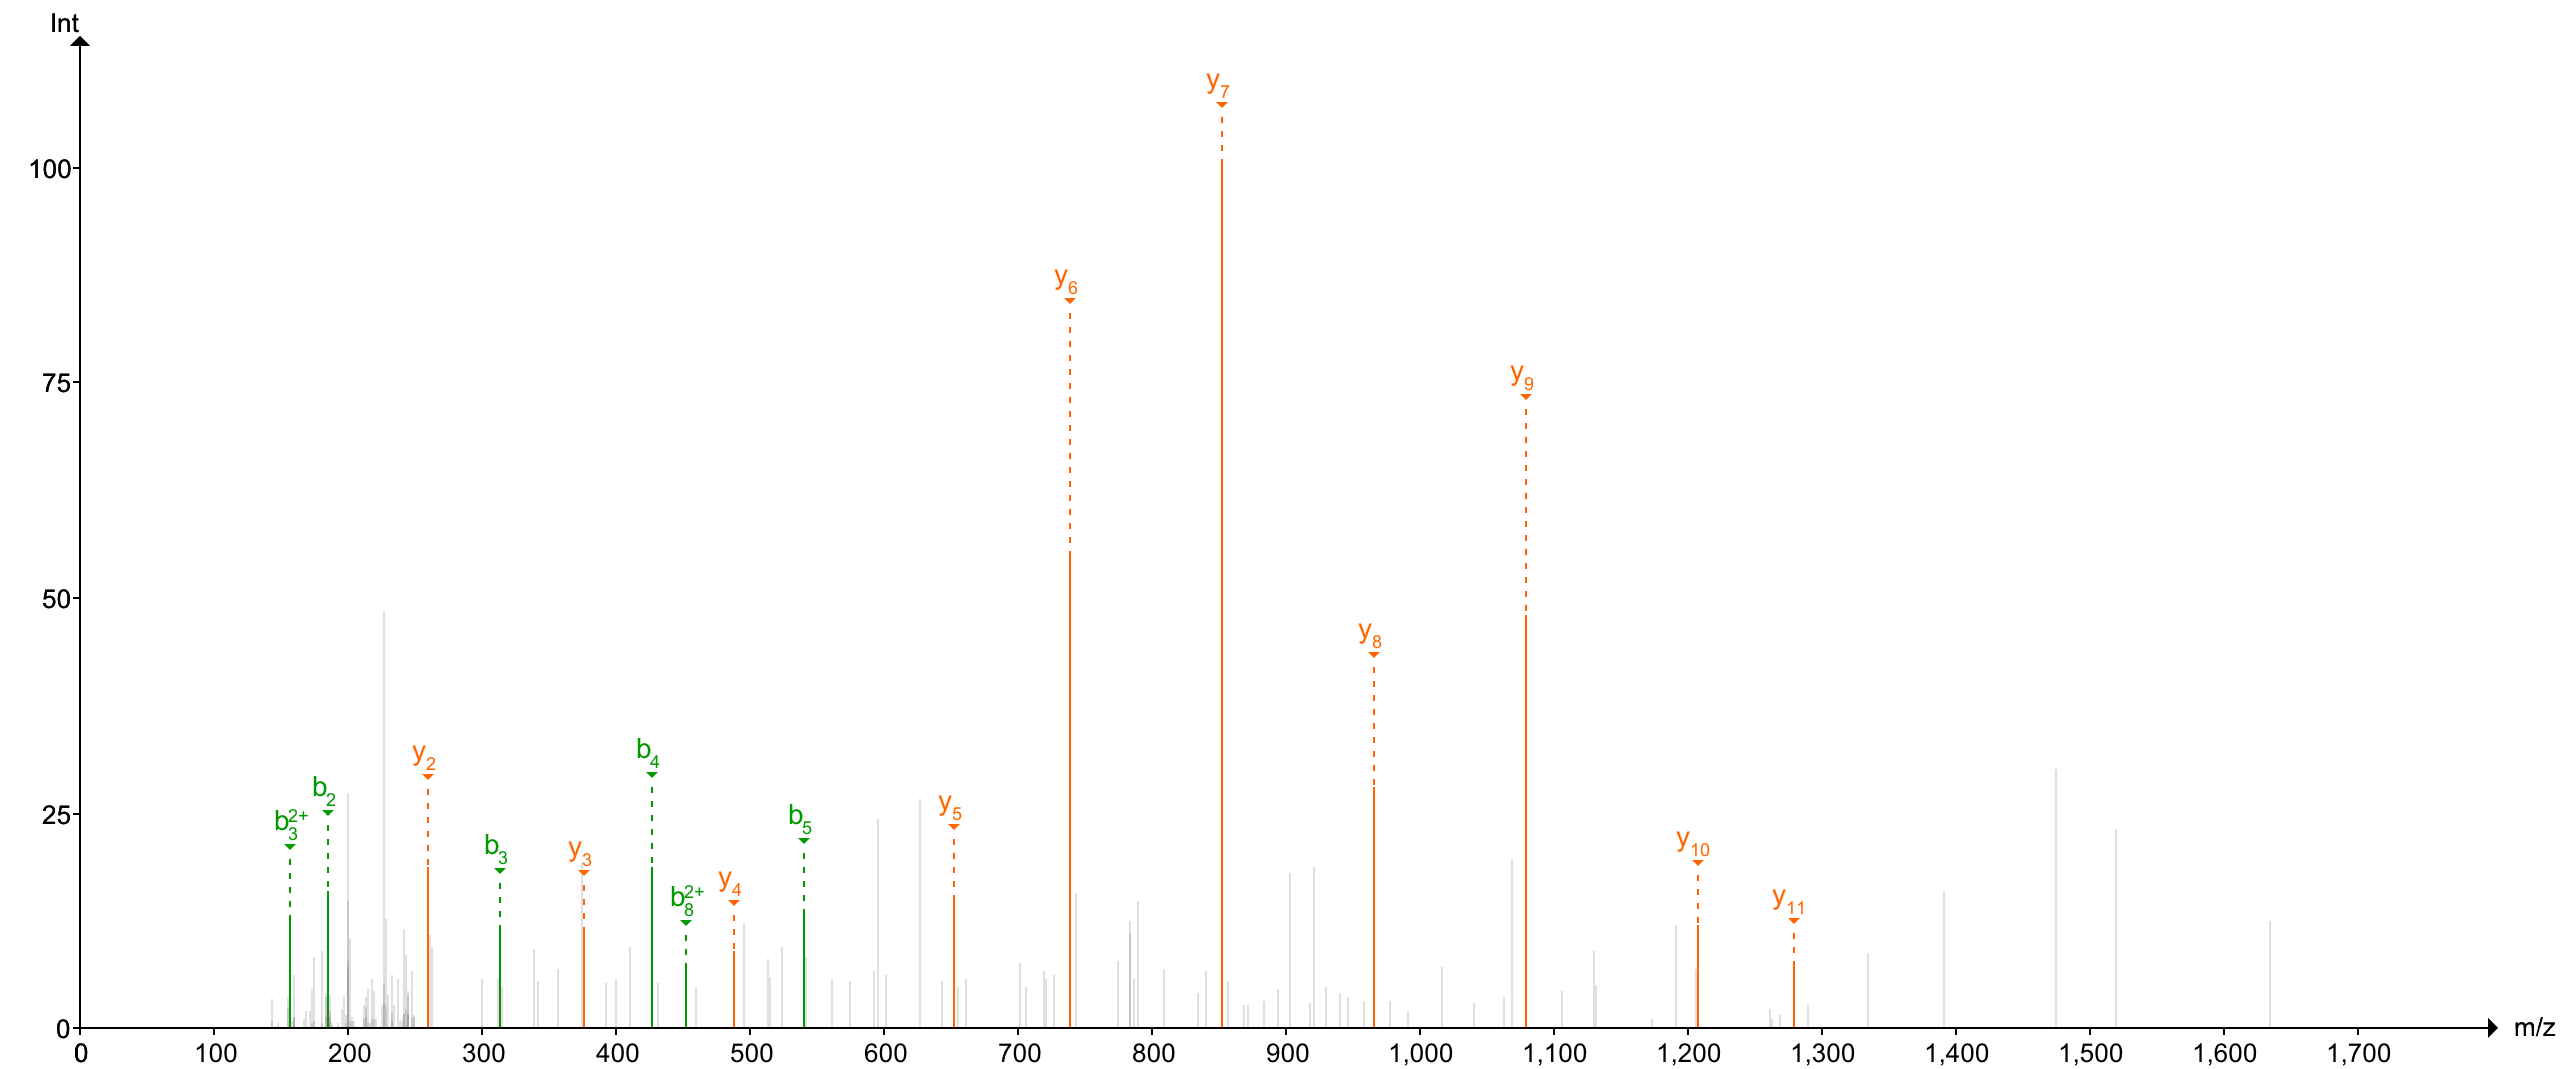

NH<sub>2</sub>-A E L G A L P D D F I D S L E K-COOH  
b<sub>2</sub> b<sub>3</sub> b<sub>4</sub> b<sub>5</sub> b<sub>6</sub> b<sub>8</sub> y<sub>1</sub> y<sub>2</sub> y<sub>3</sub> y<sub>4</sub> y<sub>5</sub> y<sub>6</sub> y<sub>7</sub> y<sub>8</sub> y<sub>9</sub> y<sub>10</sub> y<sub>11</sub> y<sub>12</sub> y<sub>13</sub>

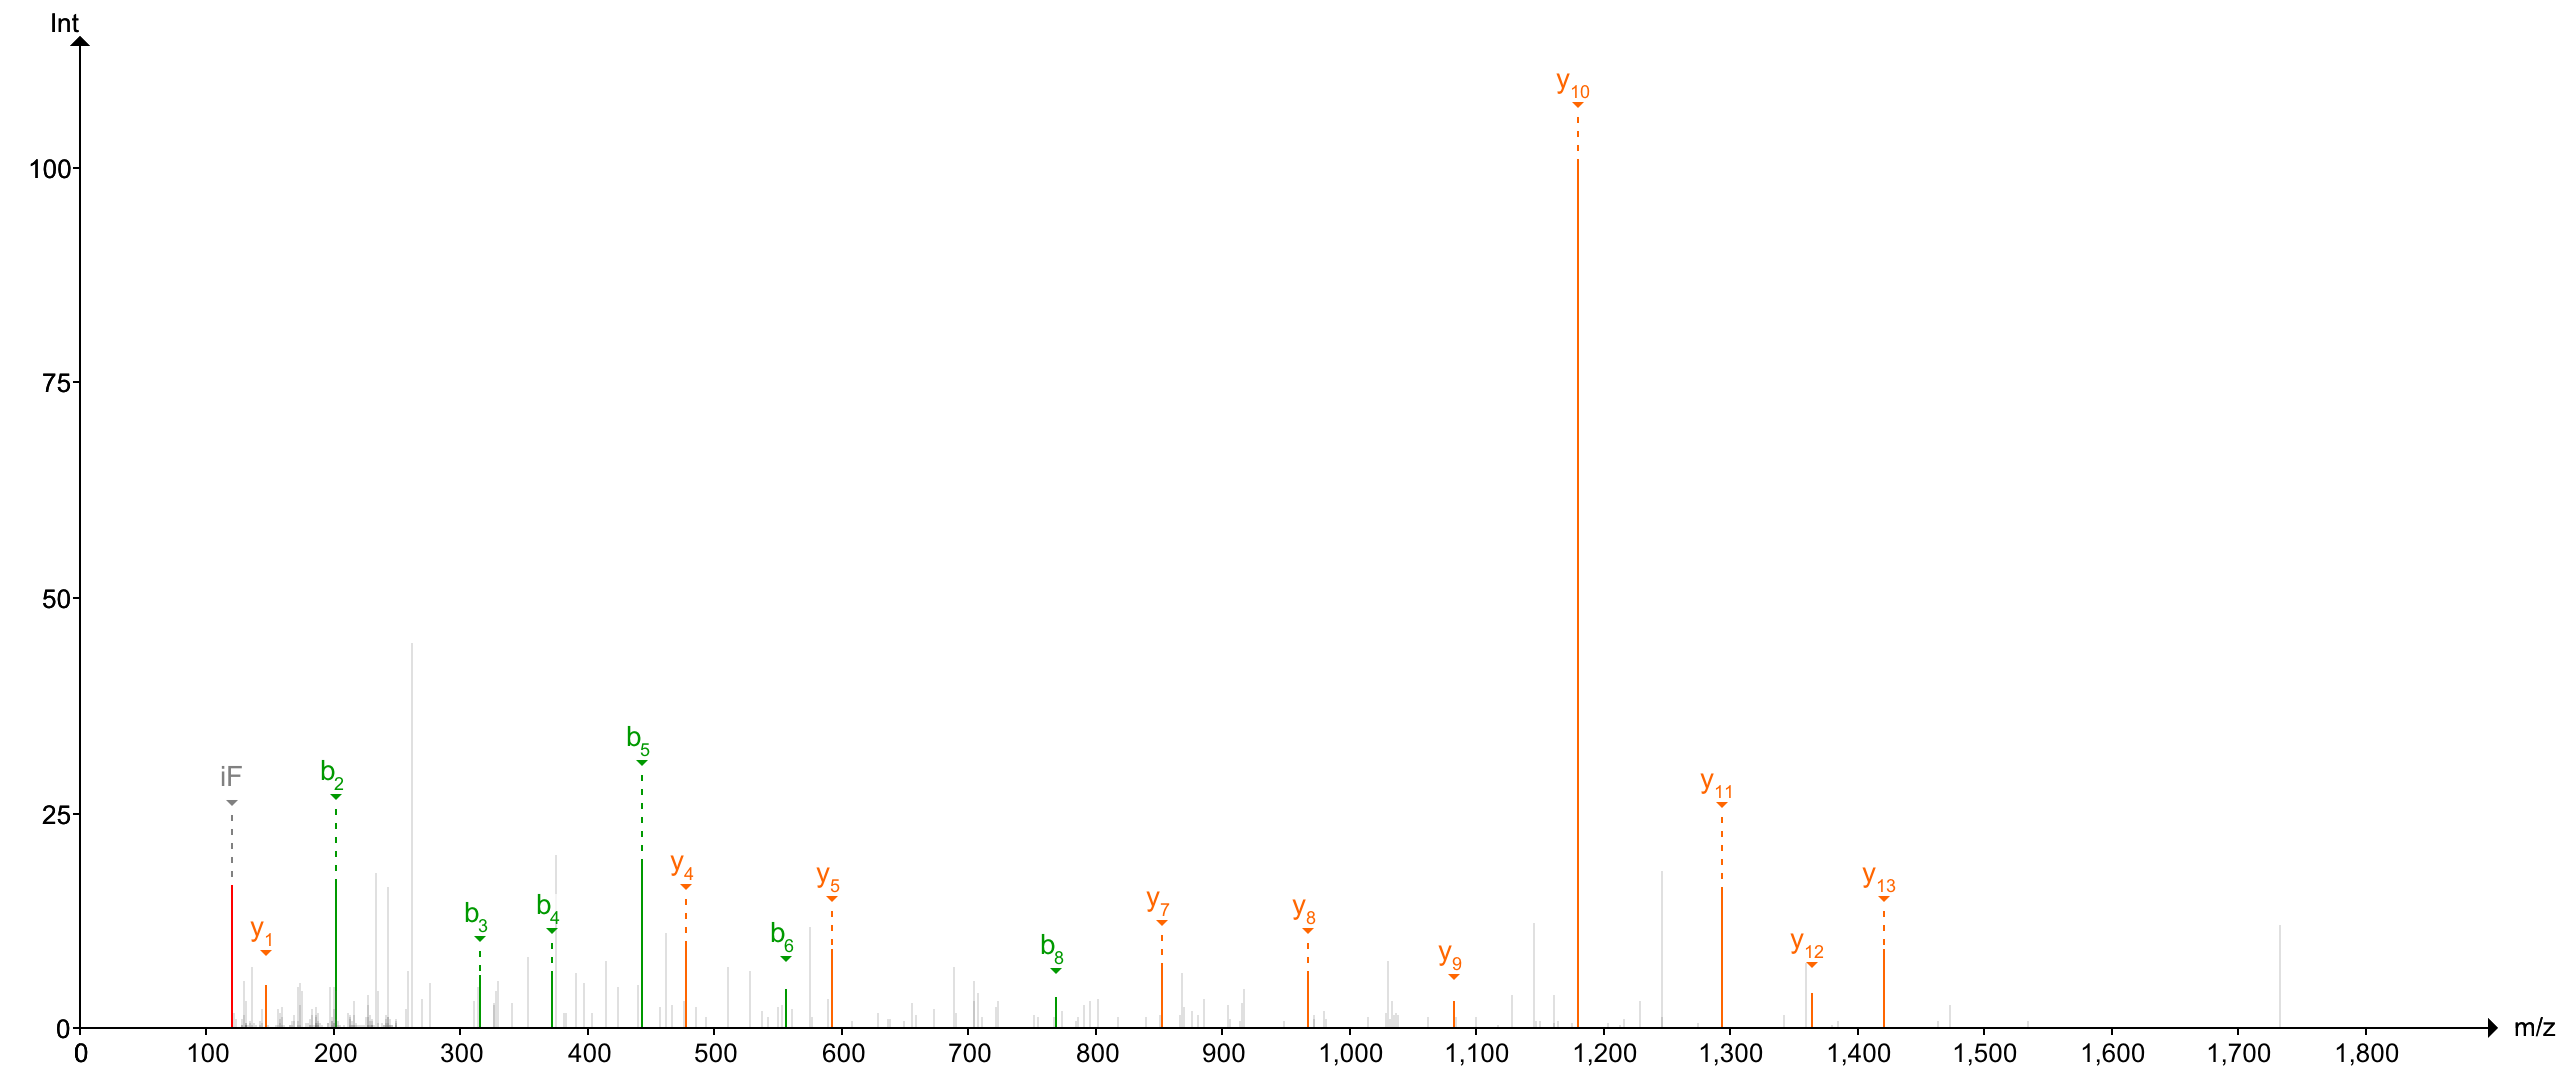

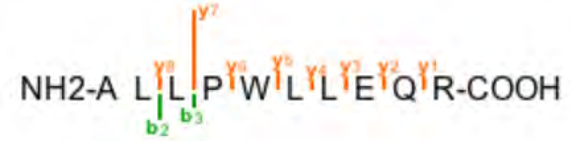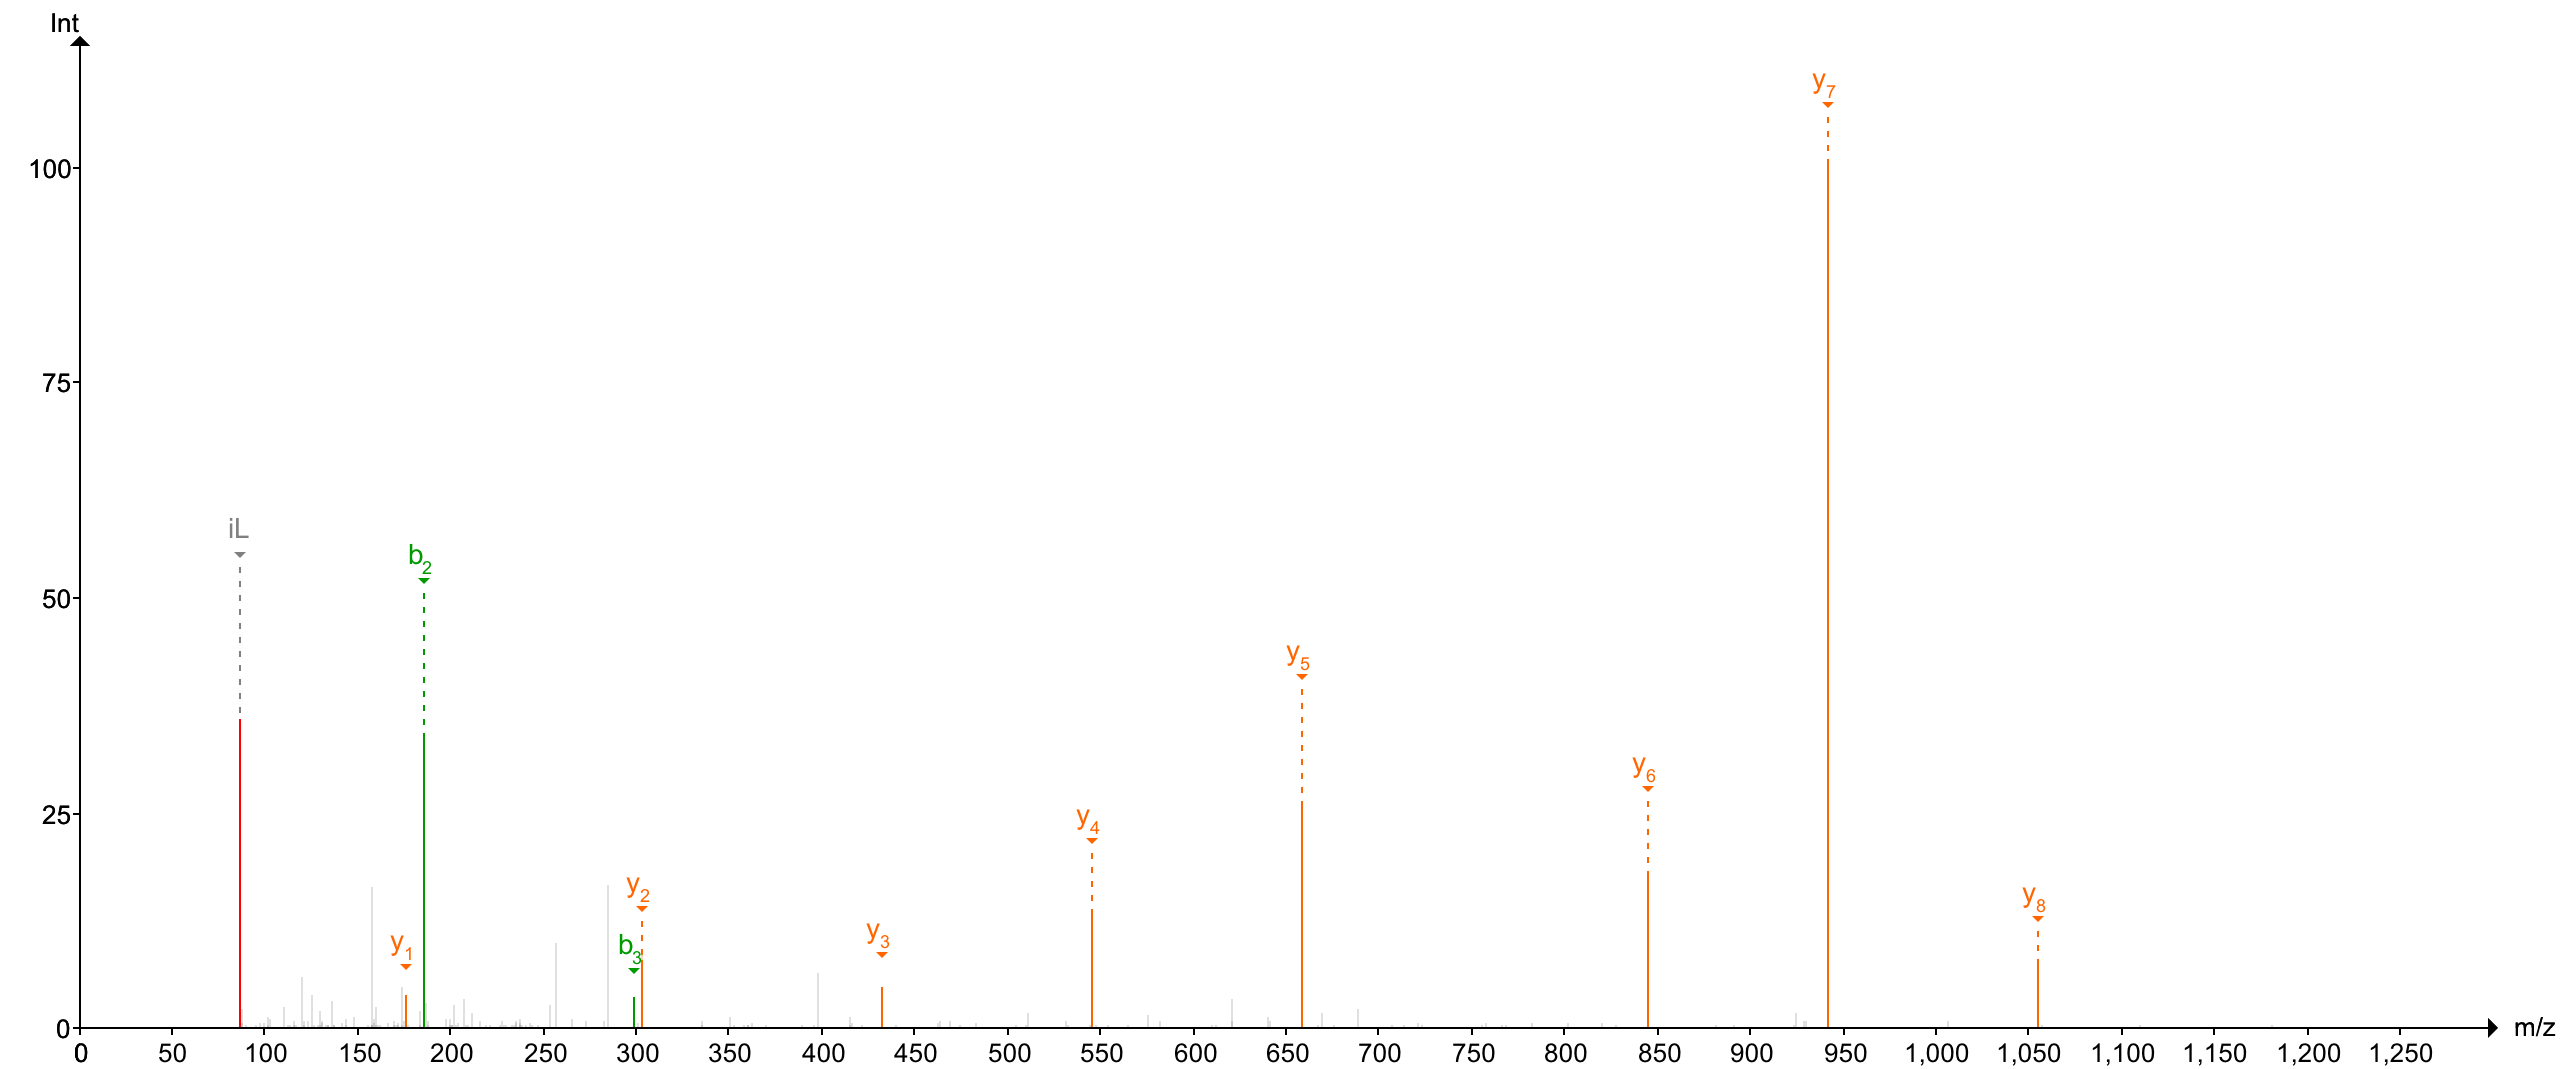

NH2-V F S I V I P F L Y V G T L I S K-COOH

b<sub>2</sub> b<sub>3</sub> b<sub>4</sub> b<sub>5</sub> b<sub>6</sub>

y<sub>13</sub> y<sub>12</sub> y<sub>11</sub>

y<sub>9</sub> y<sub>8</sub> y<sub>7</sub> y<sub>6</sub>

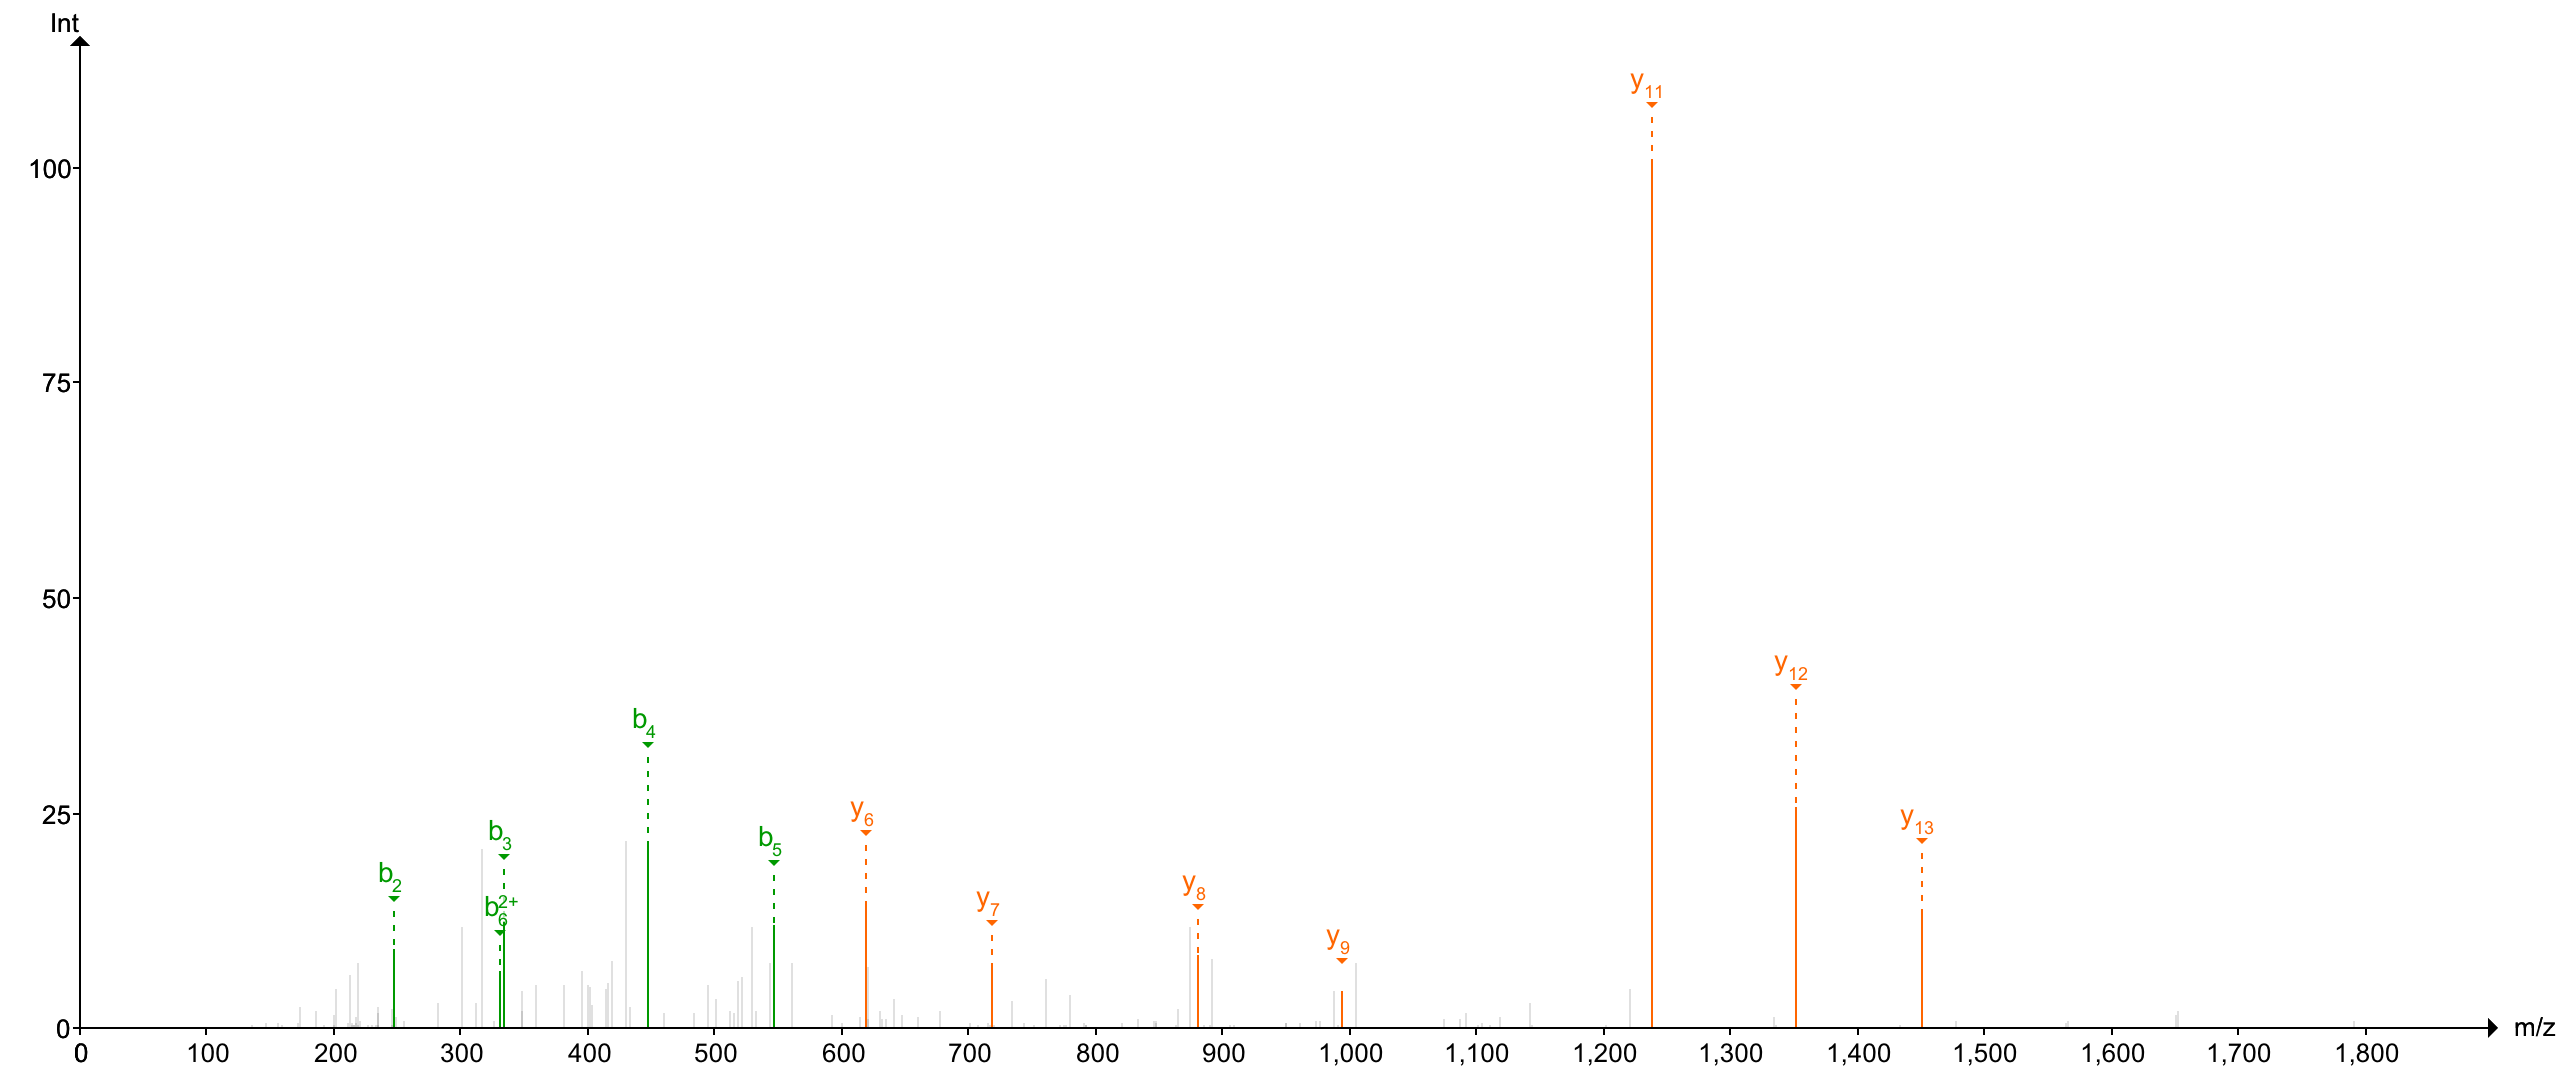

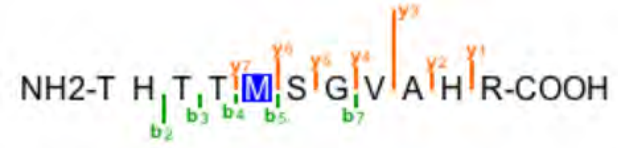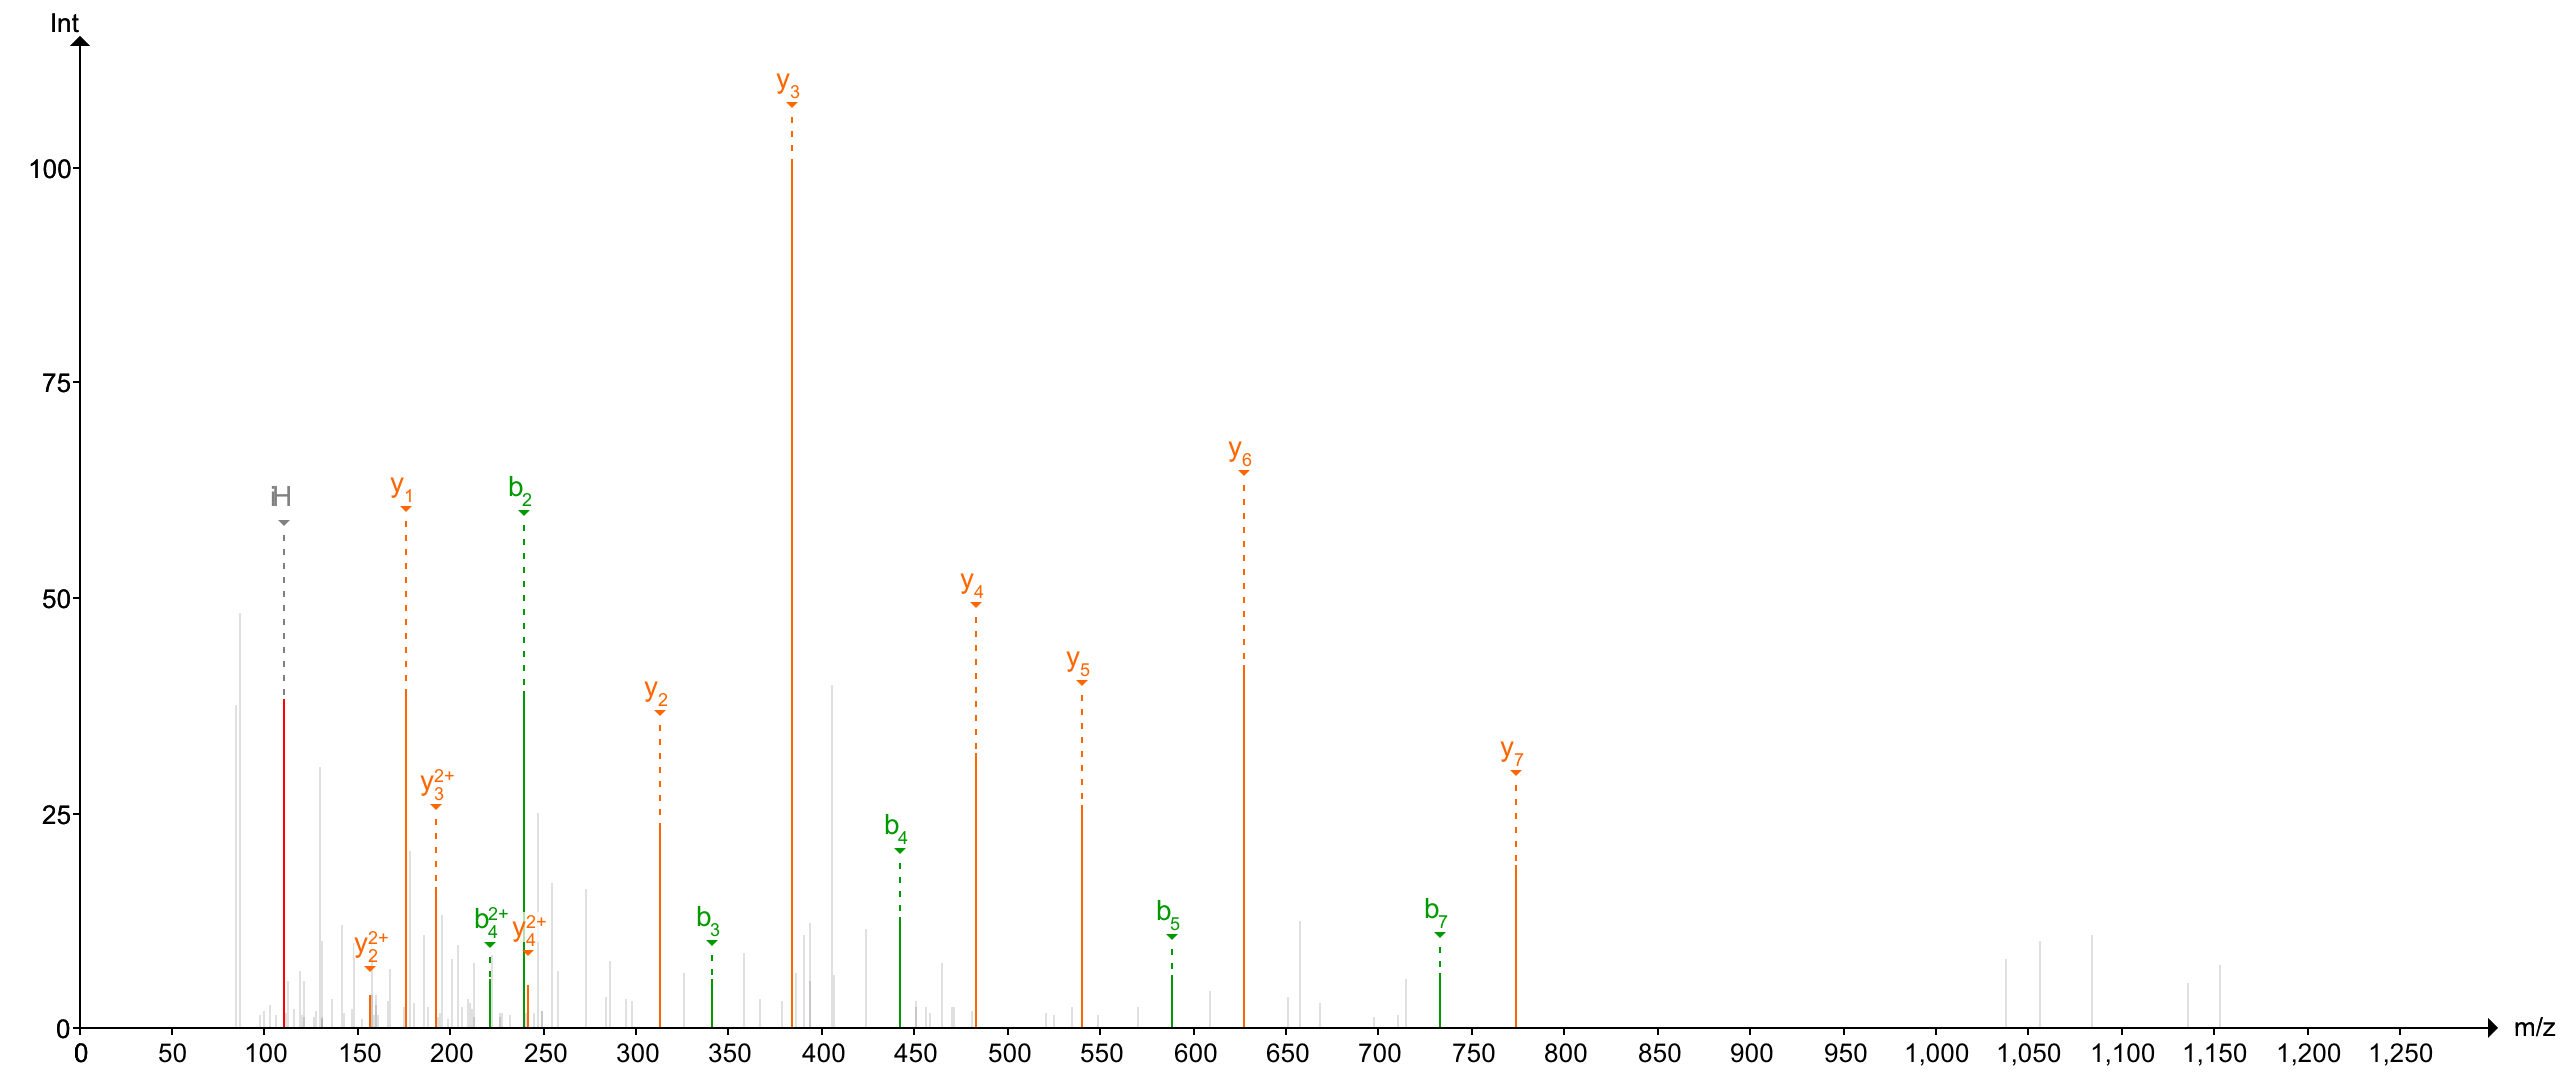



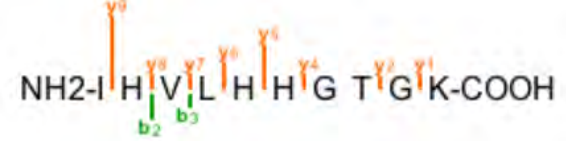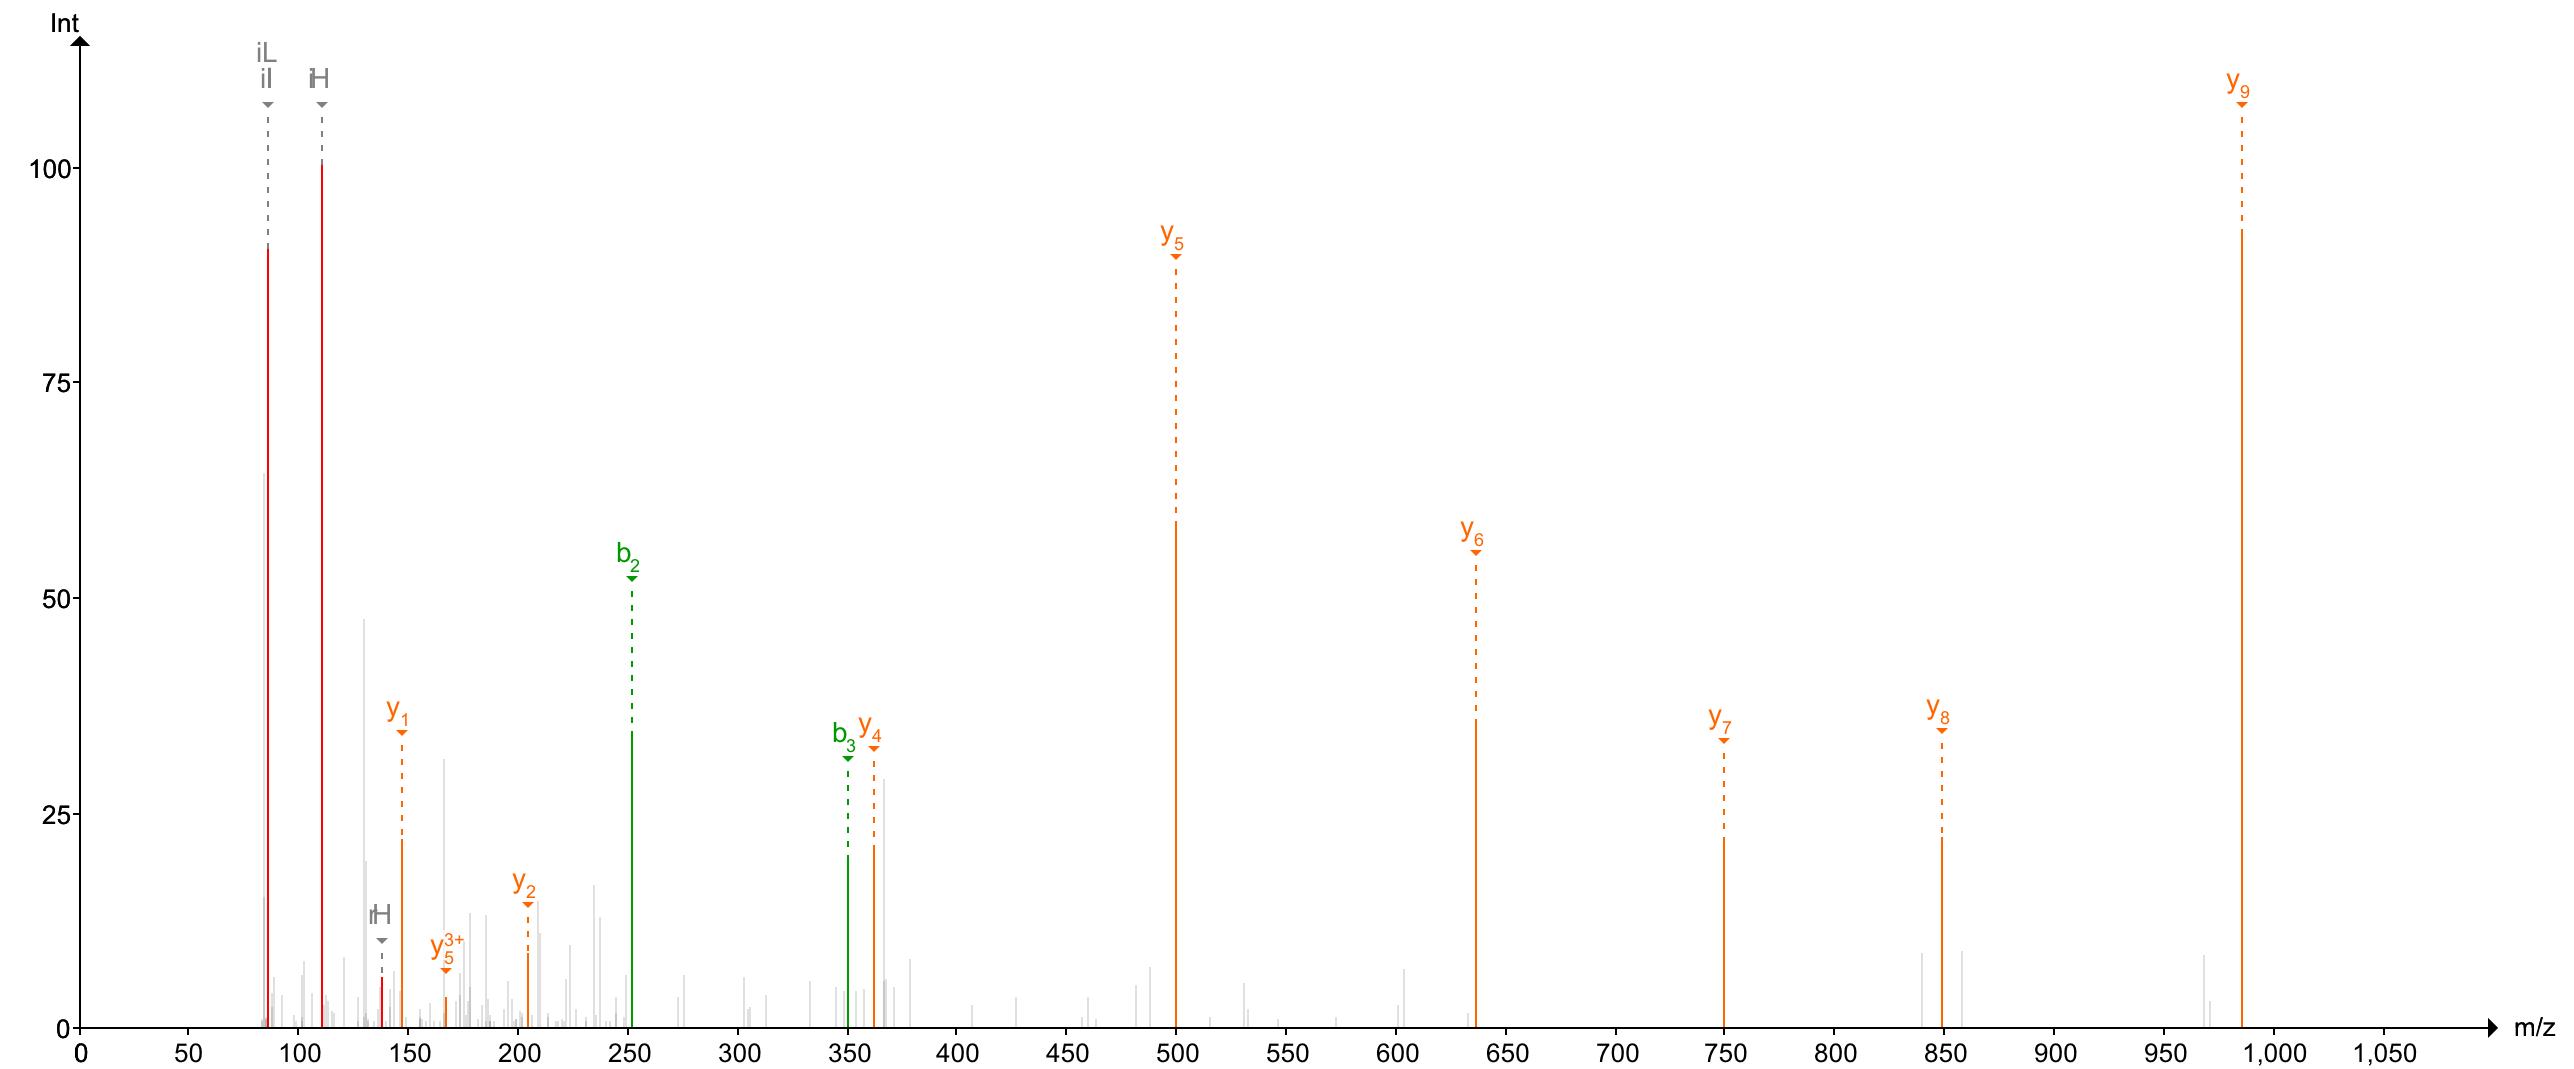

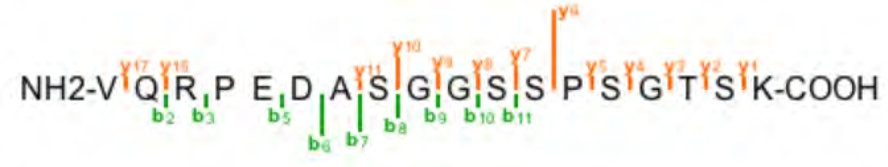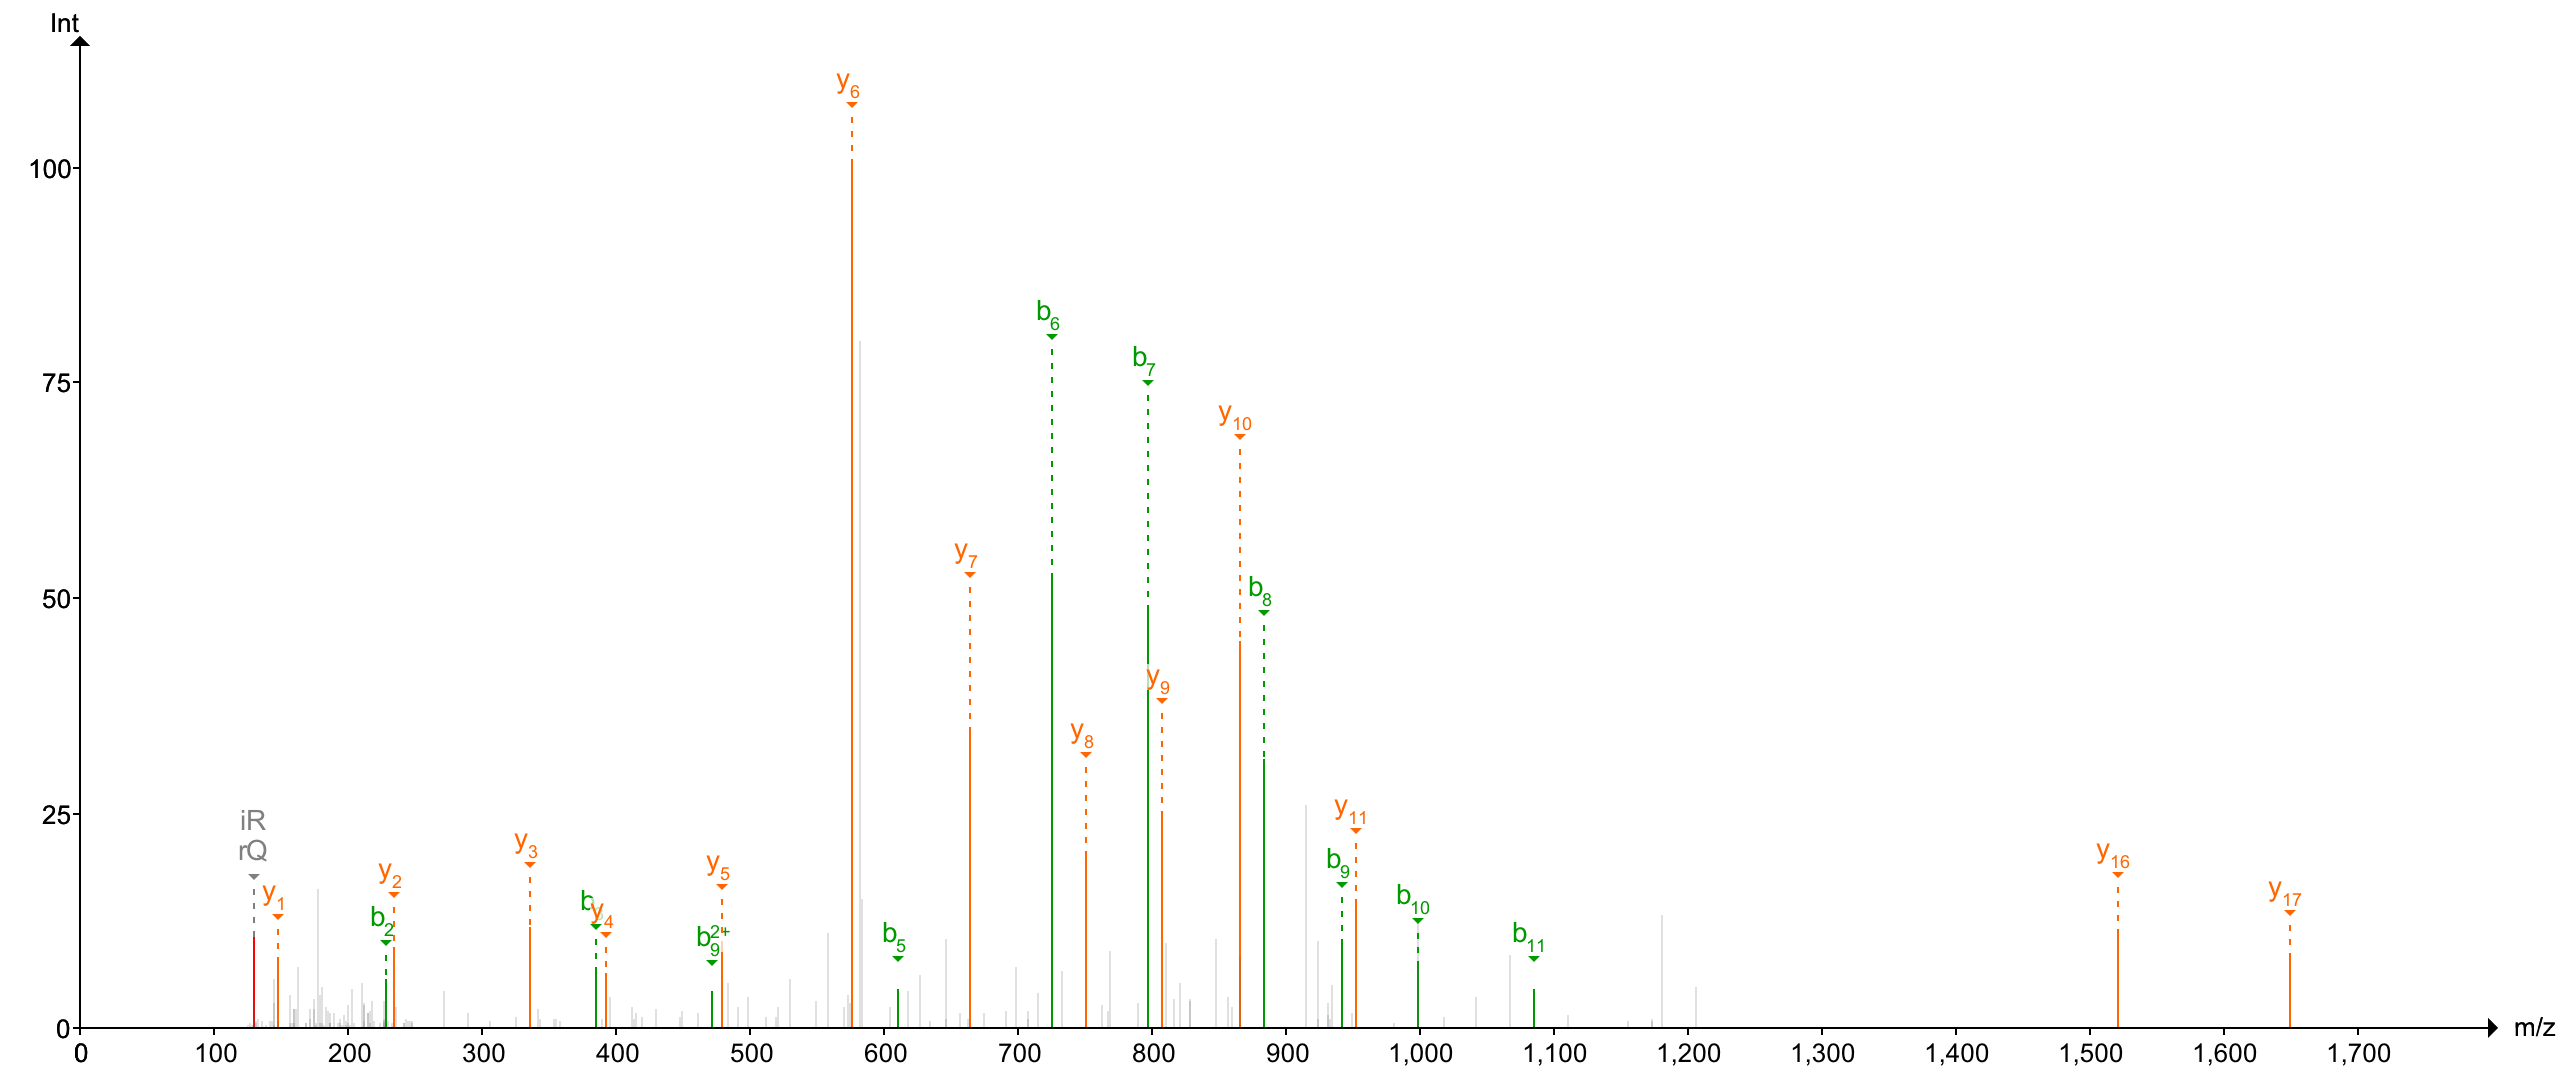

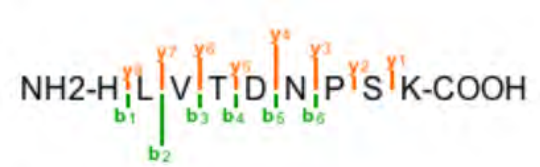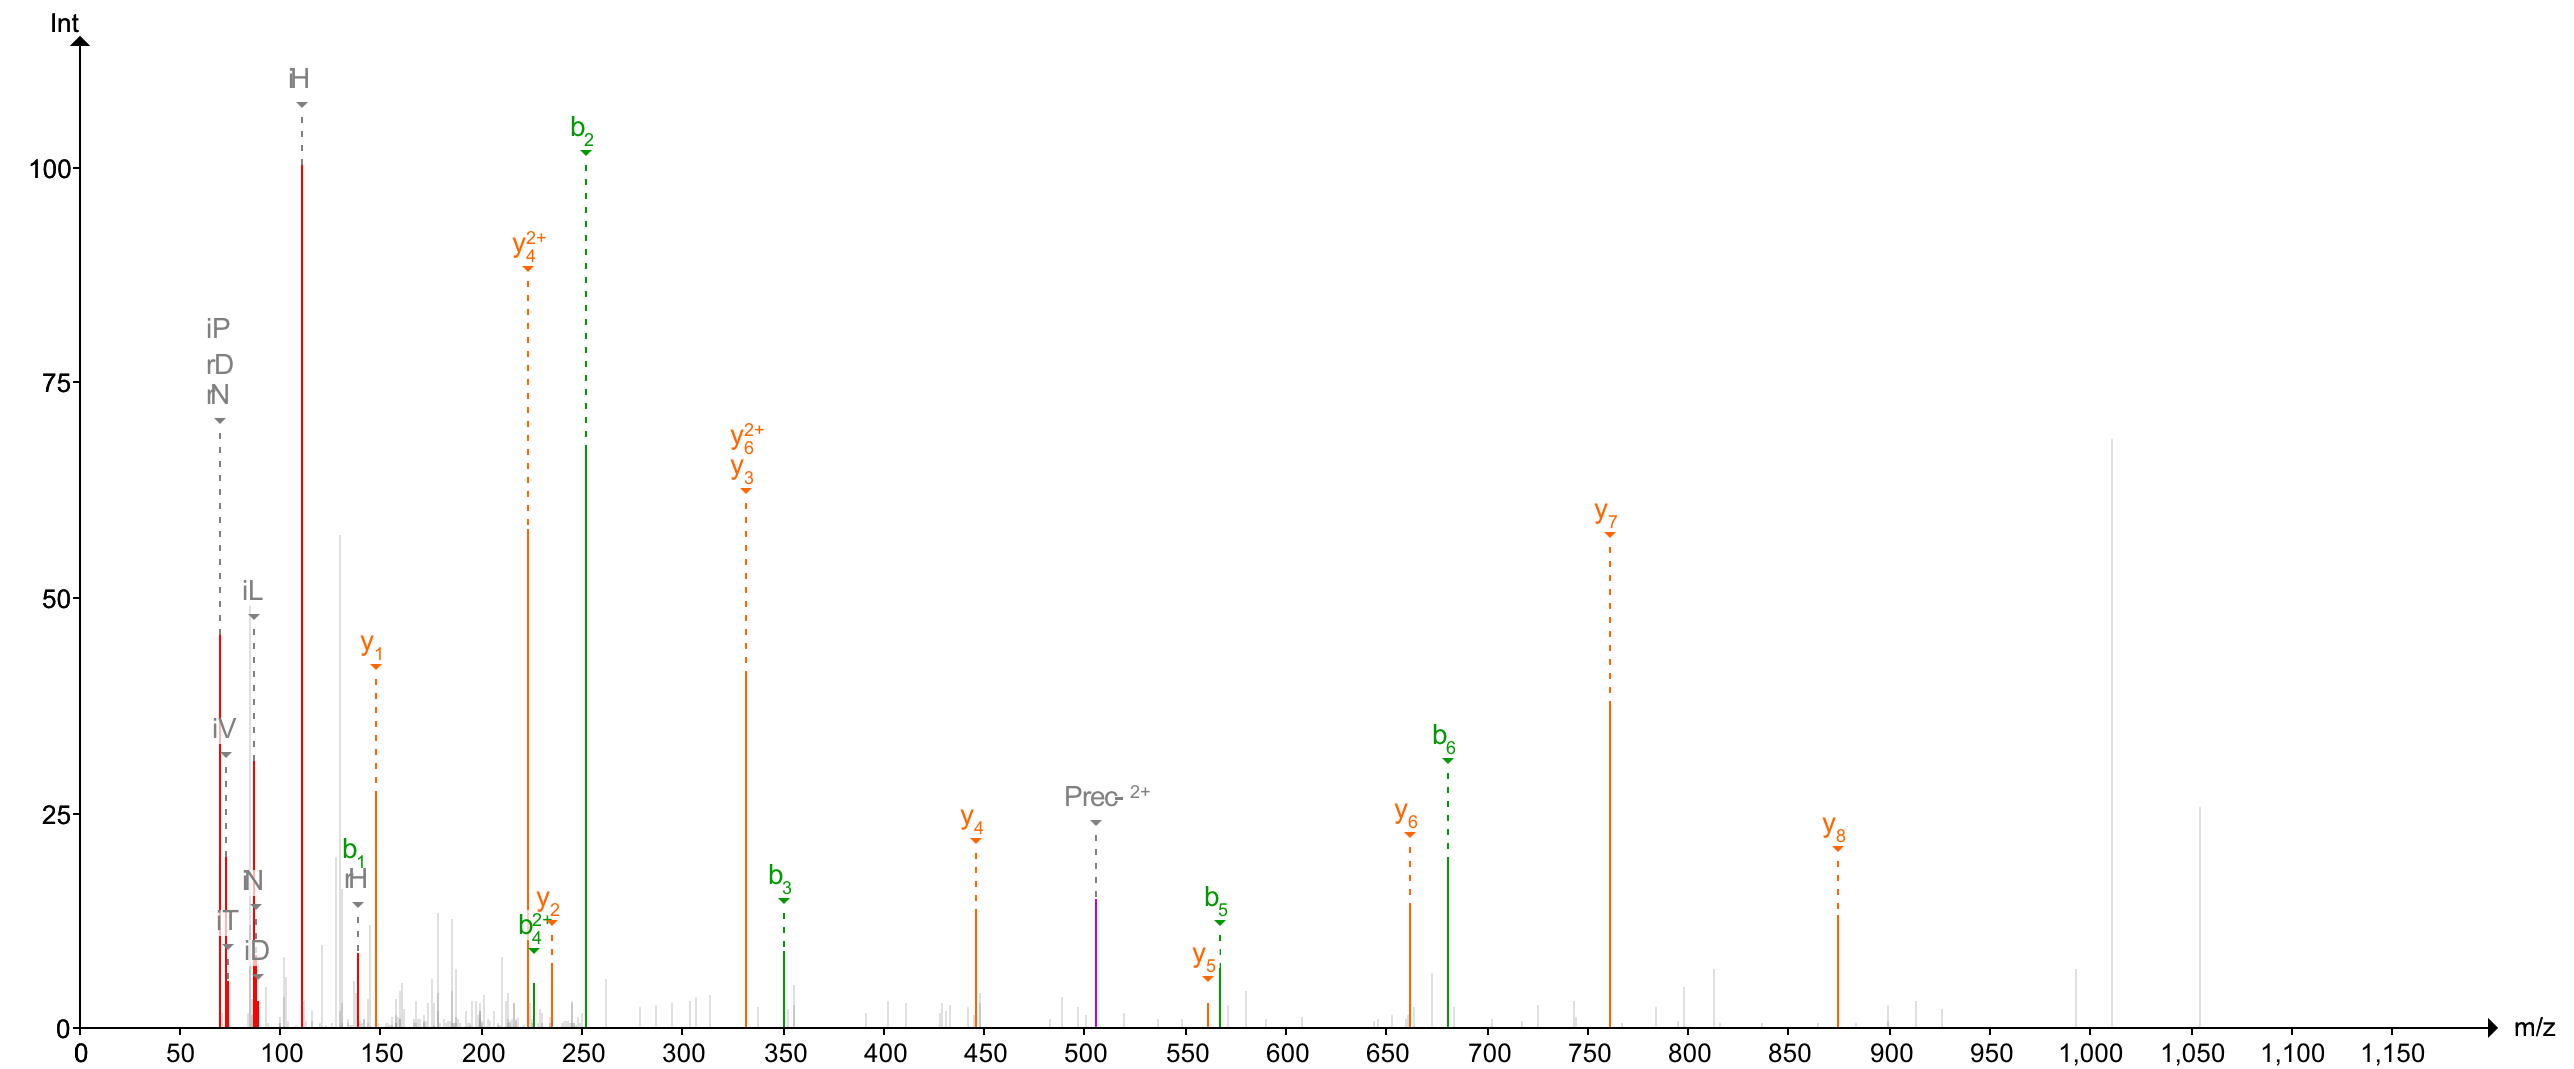

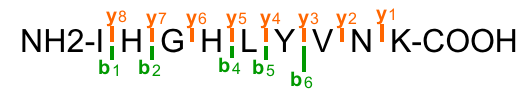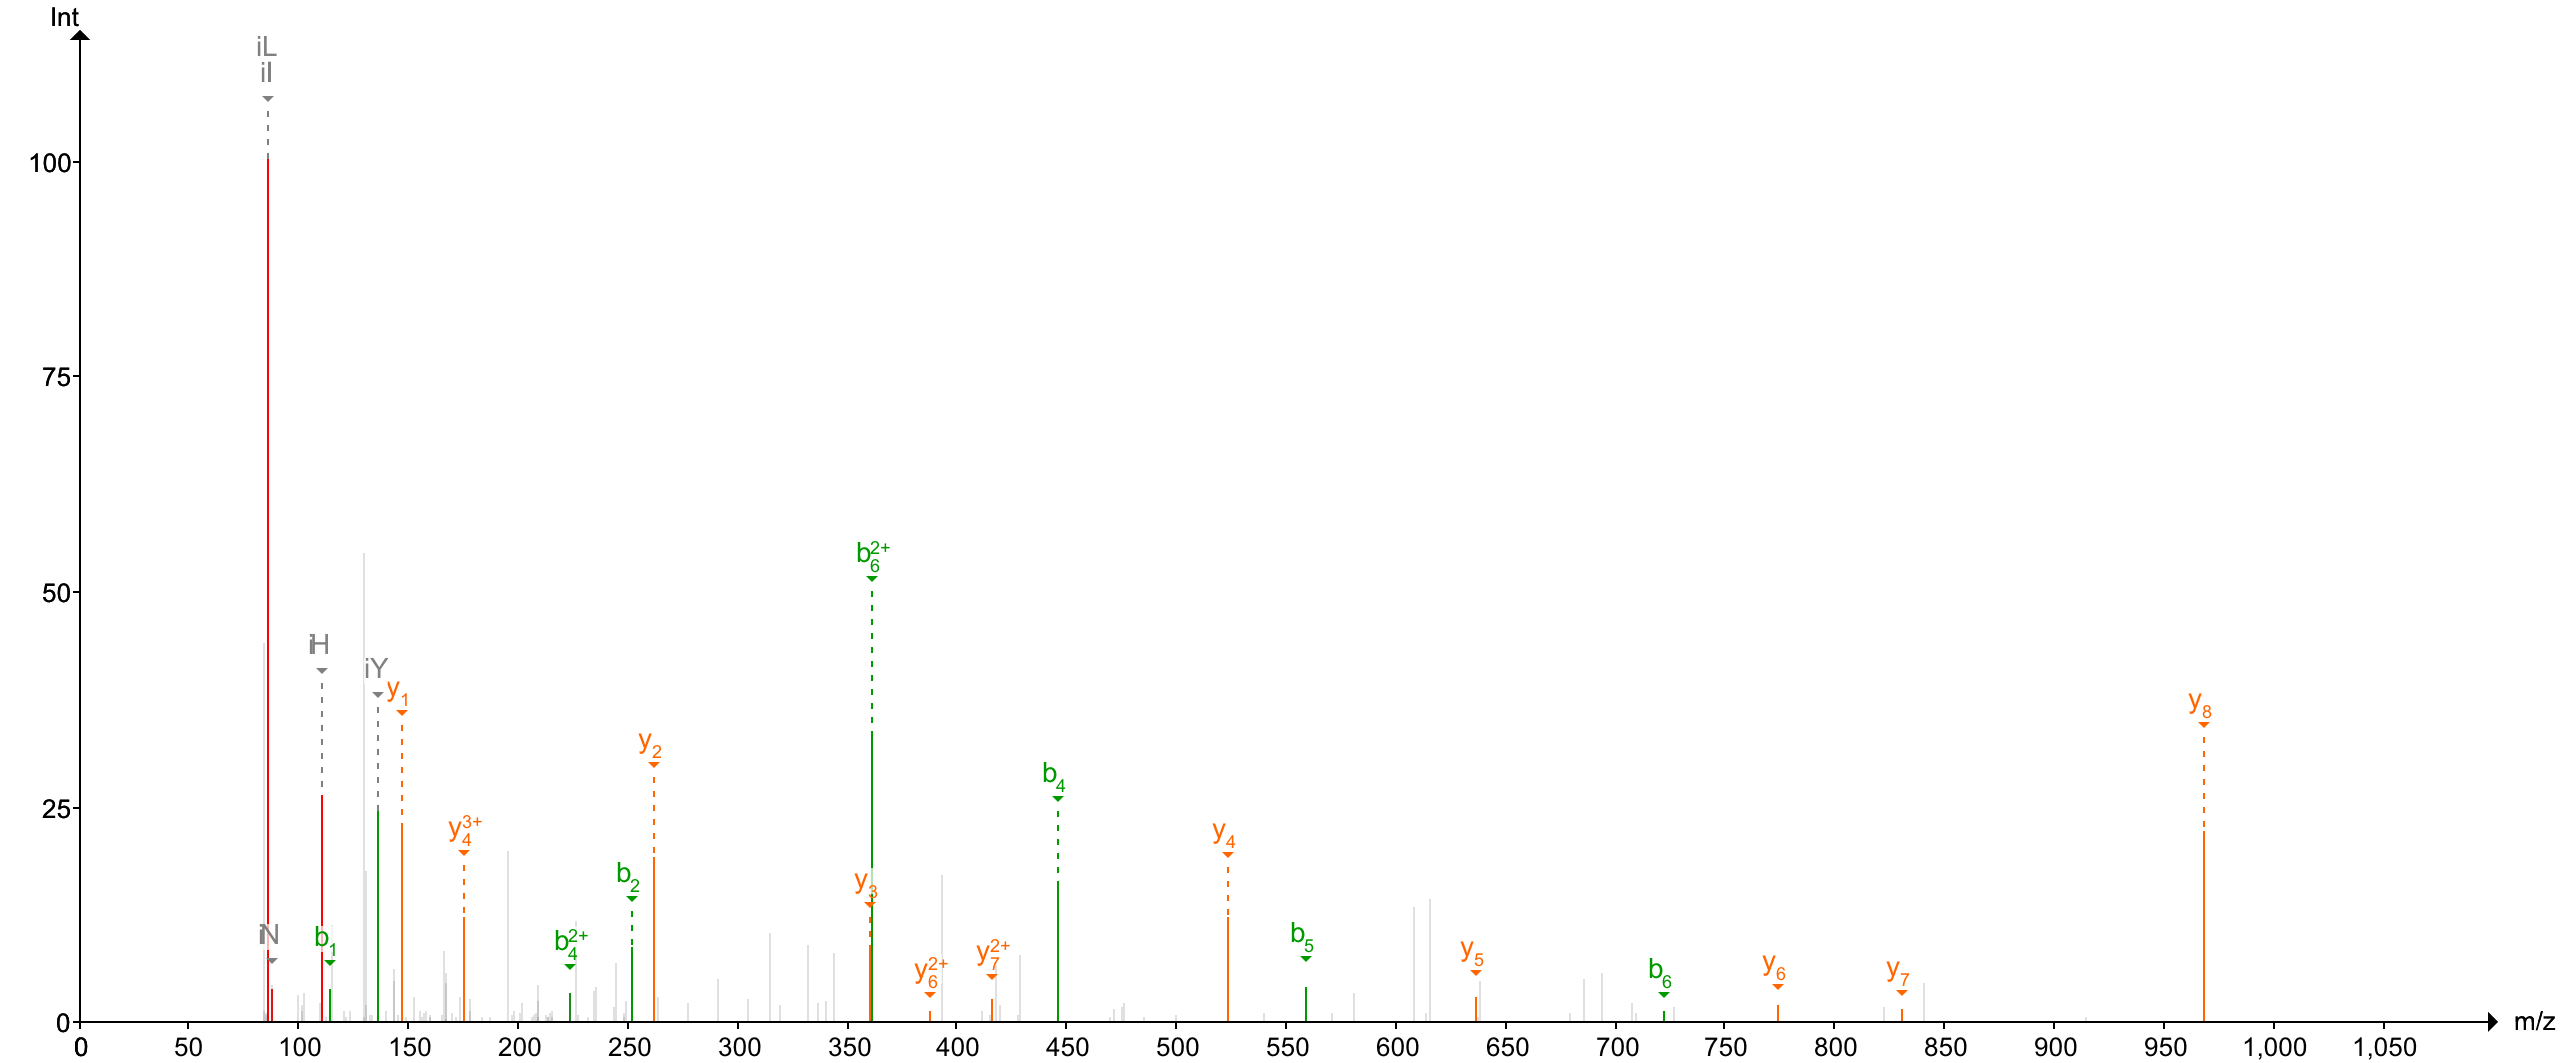

NH<sub>2</sub>-A S M Q Q Q Q Q L A S A R-COOH  
b<sub>2</sub> b<sub>3</sub> b<sub>4</sub> b<sub>5</sub> b<sub>6</sub> b<sub>7</sub> b<sub>8</sub> b<sub>9</sub> y<sub>11</sub> y<sub>10</sub> y<sub>9</sub> y<sub>8</sub> y<sub>7</sub> y<sub>6</sub> y<sub>5</sub> y<sub>4</sub> y<sub>3</sub> y<sub>2</sub> y<sub>1</sub> y<sub>2</sub><sup>+</sup> y<sub>1</sub><sup>+</sup>

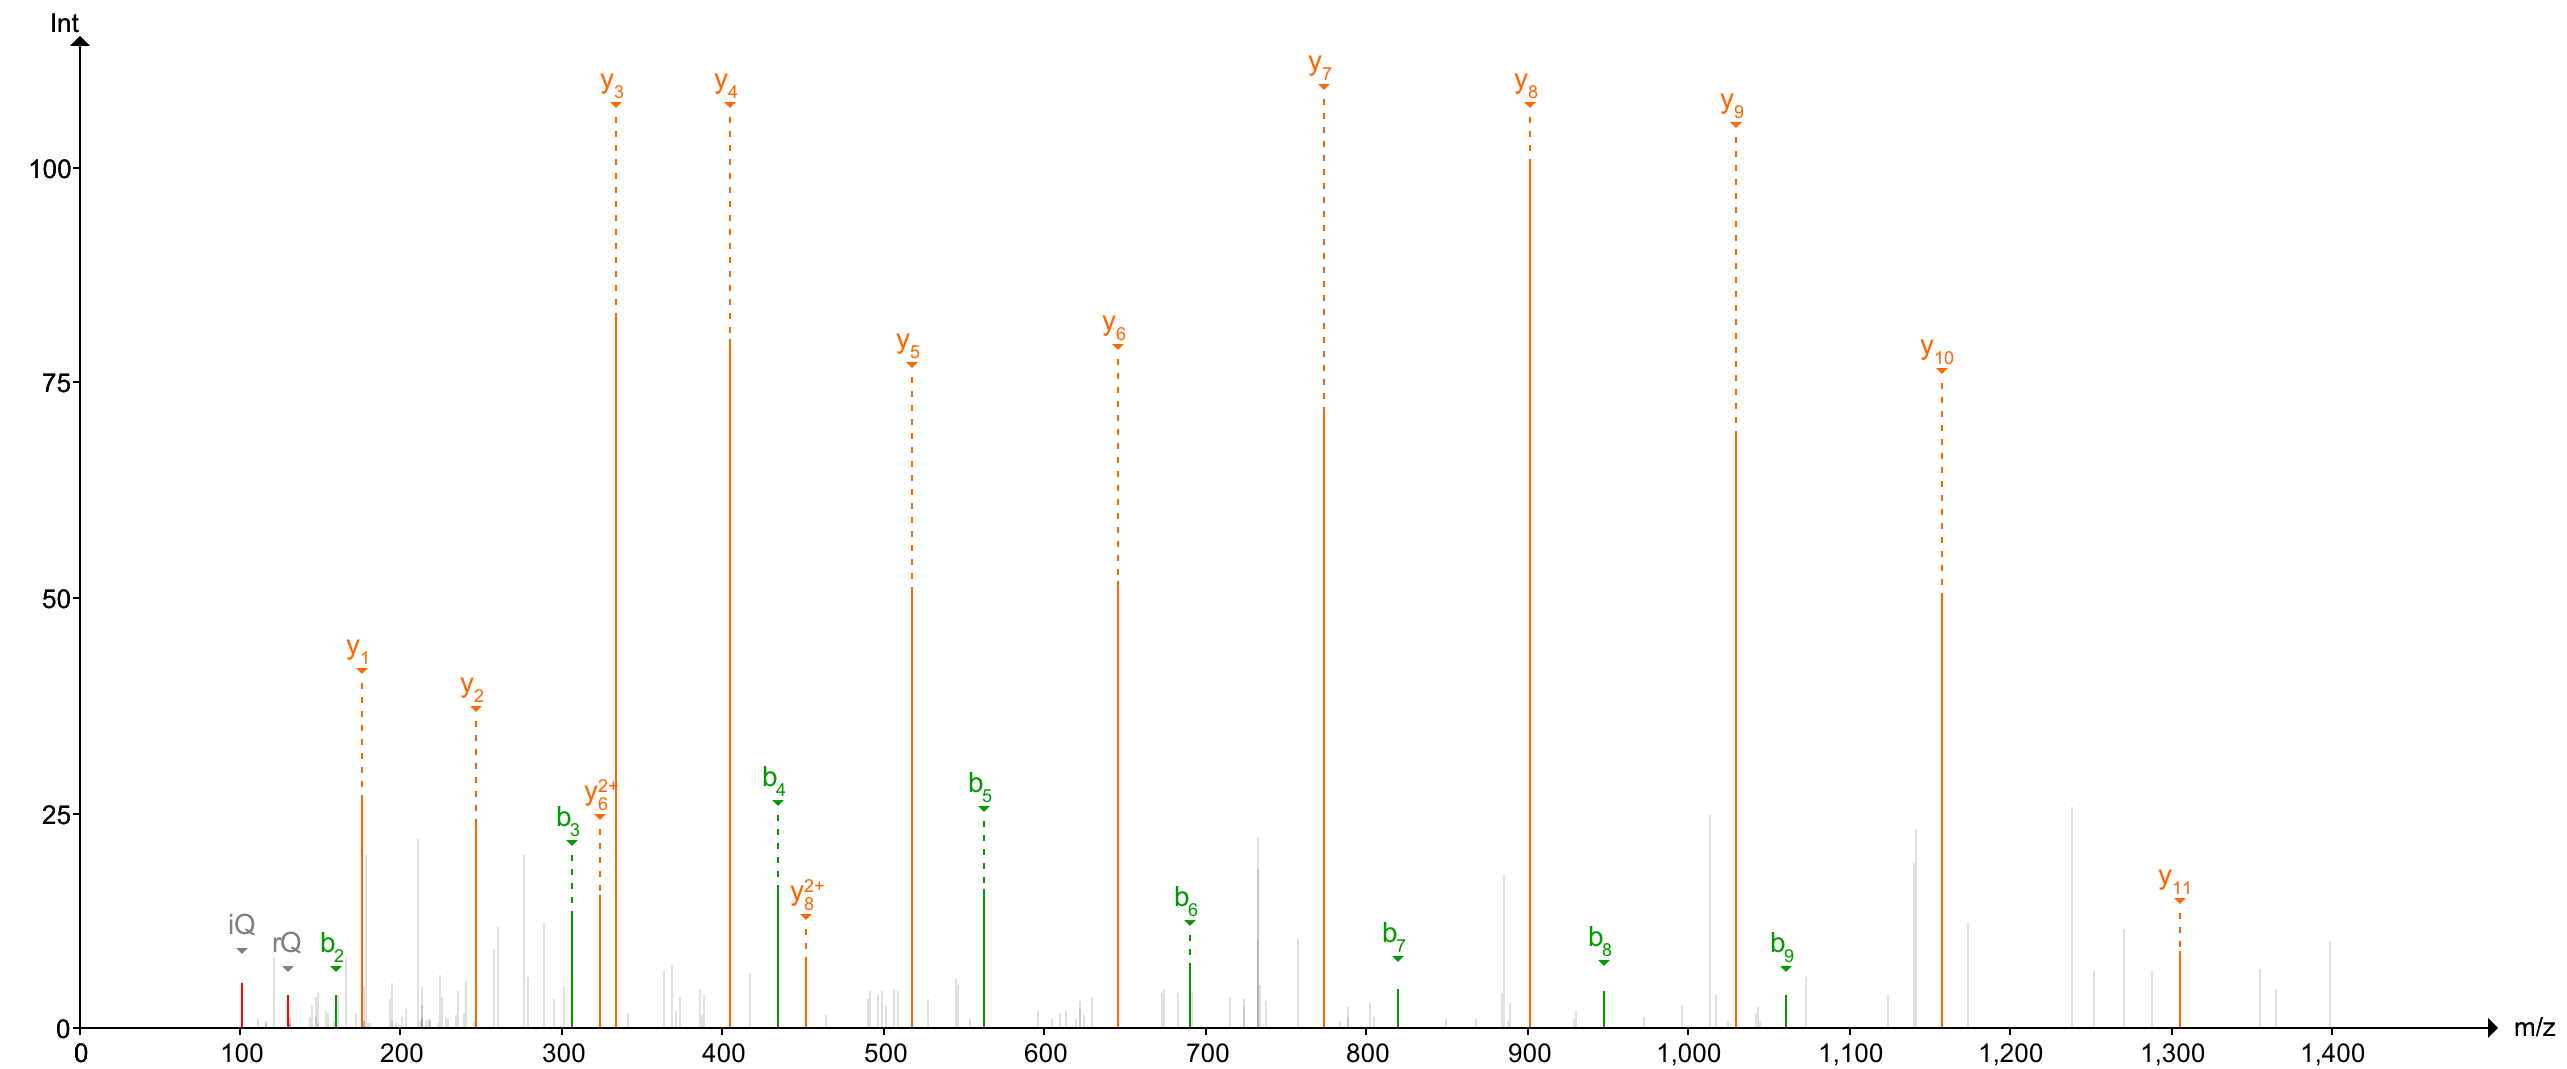

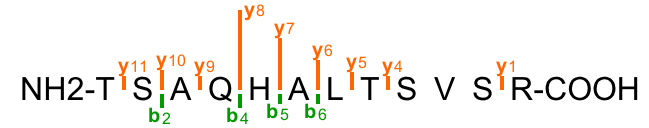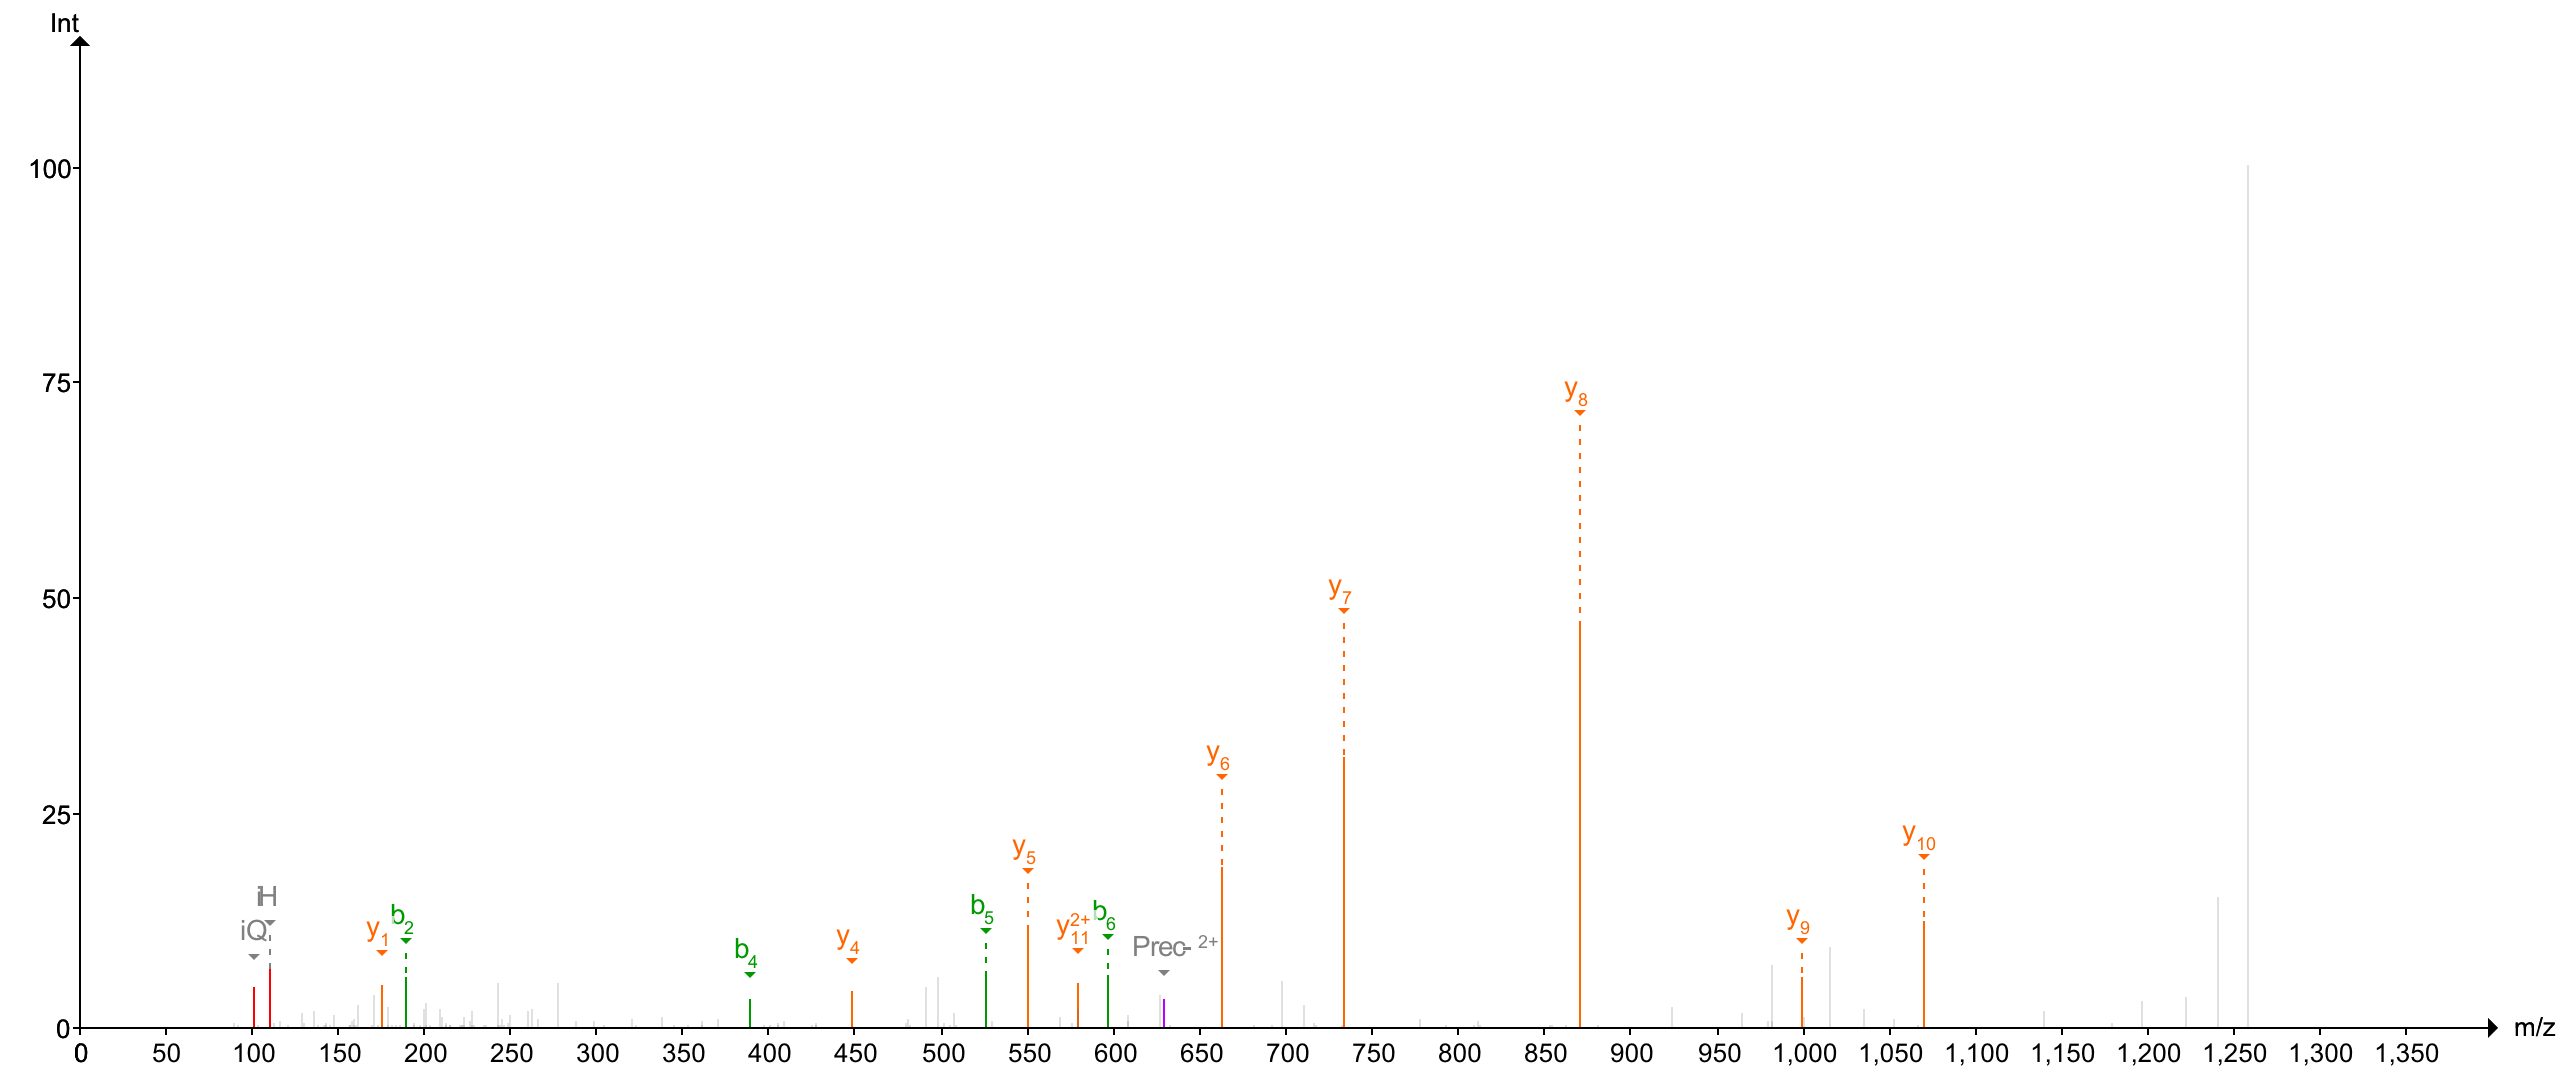

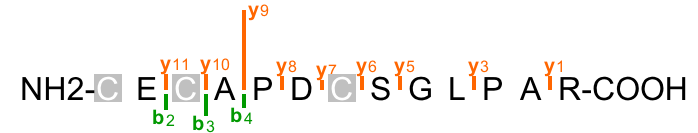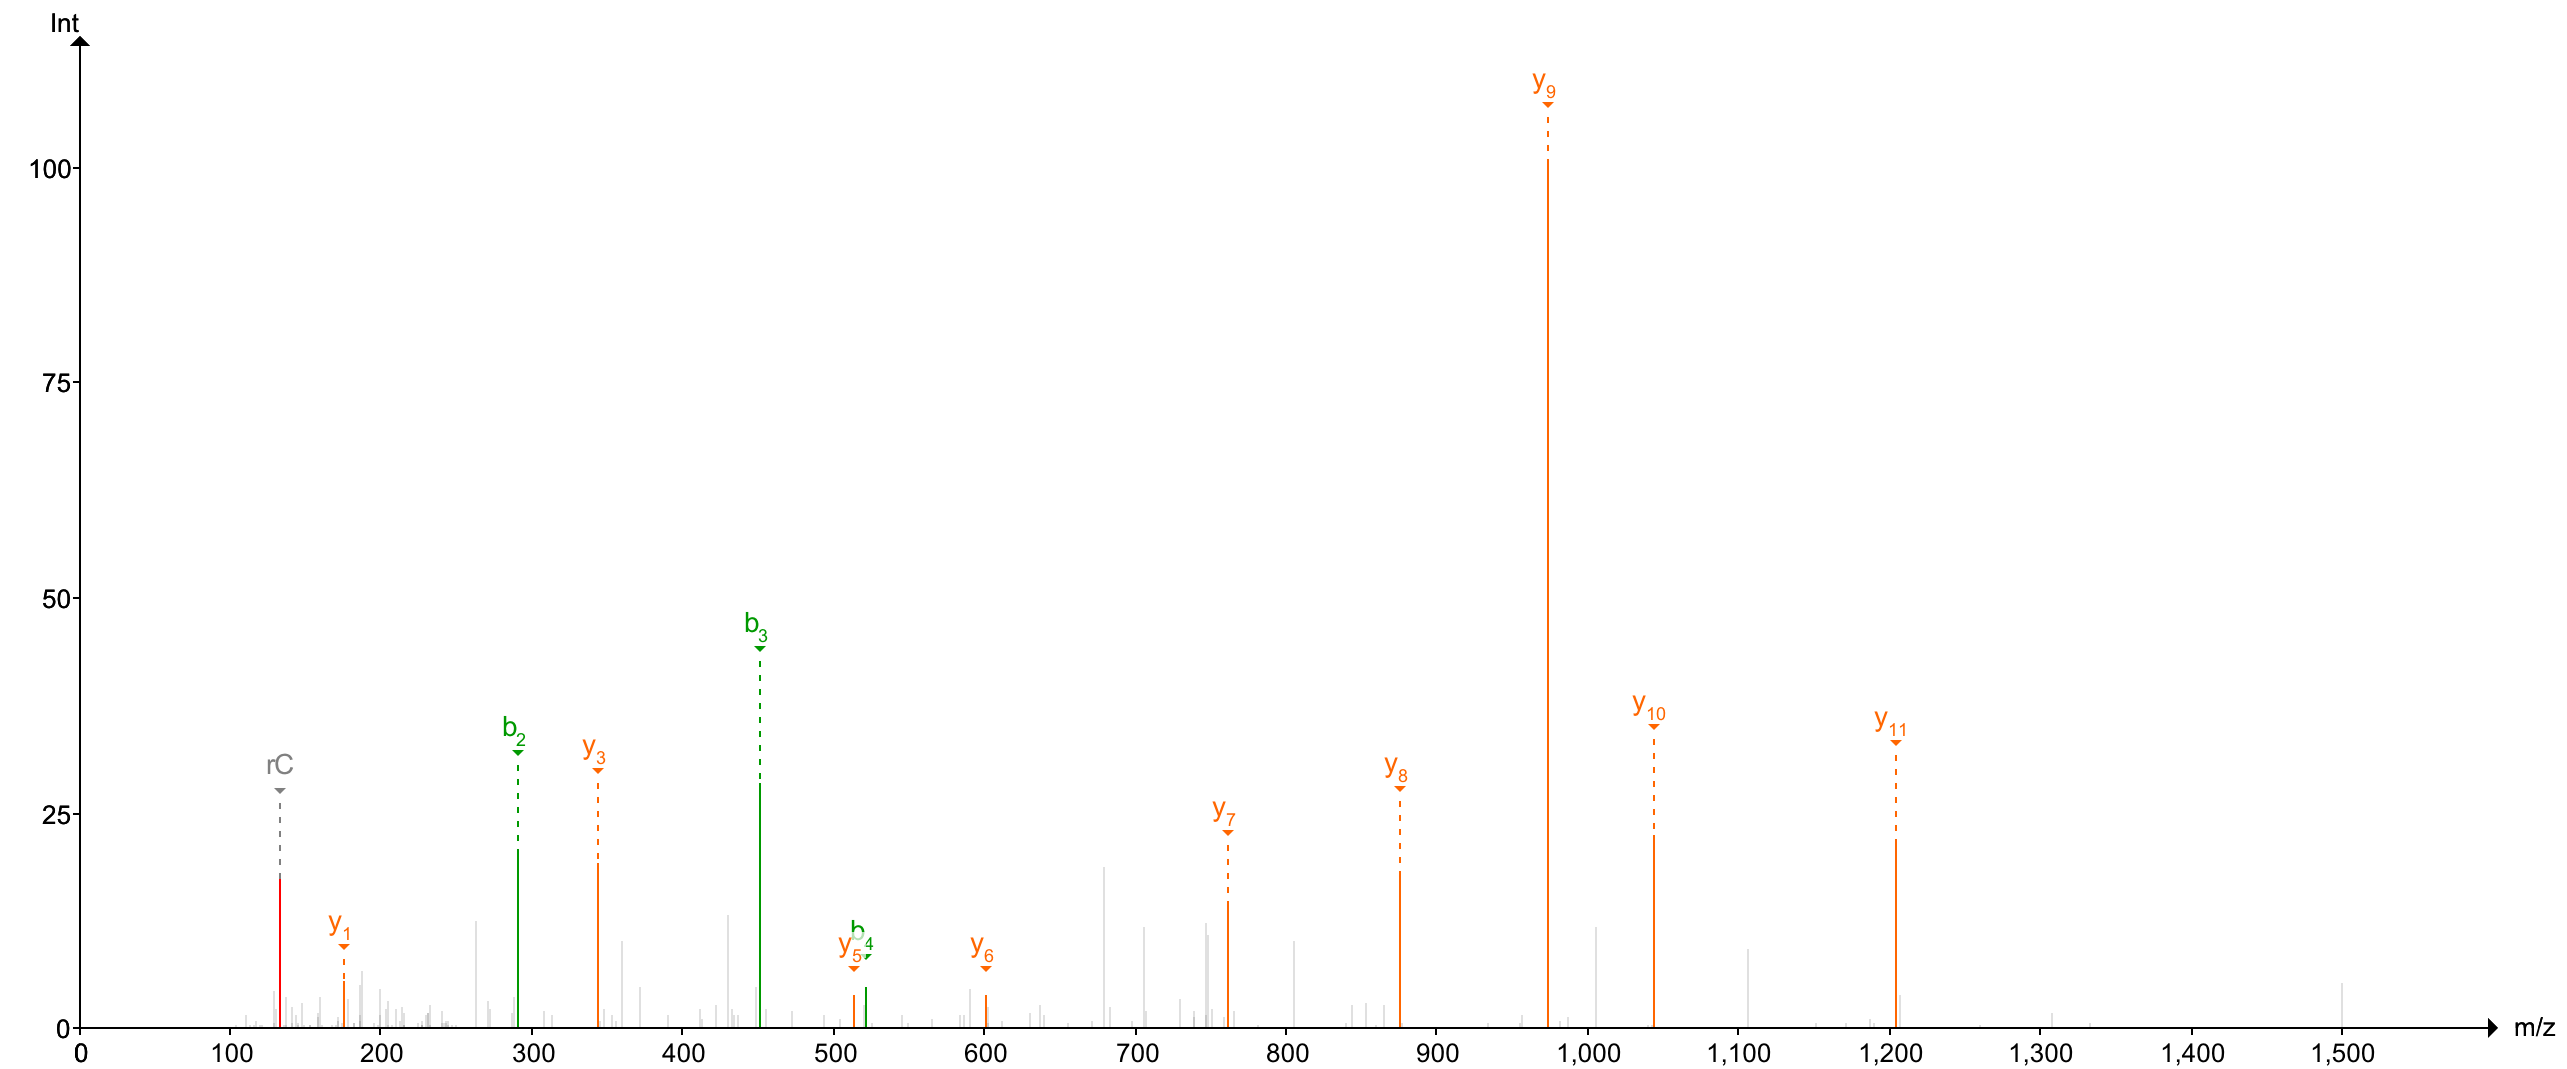

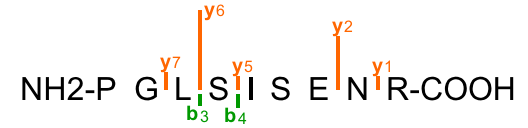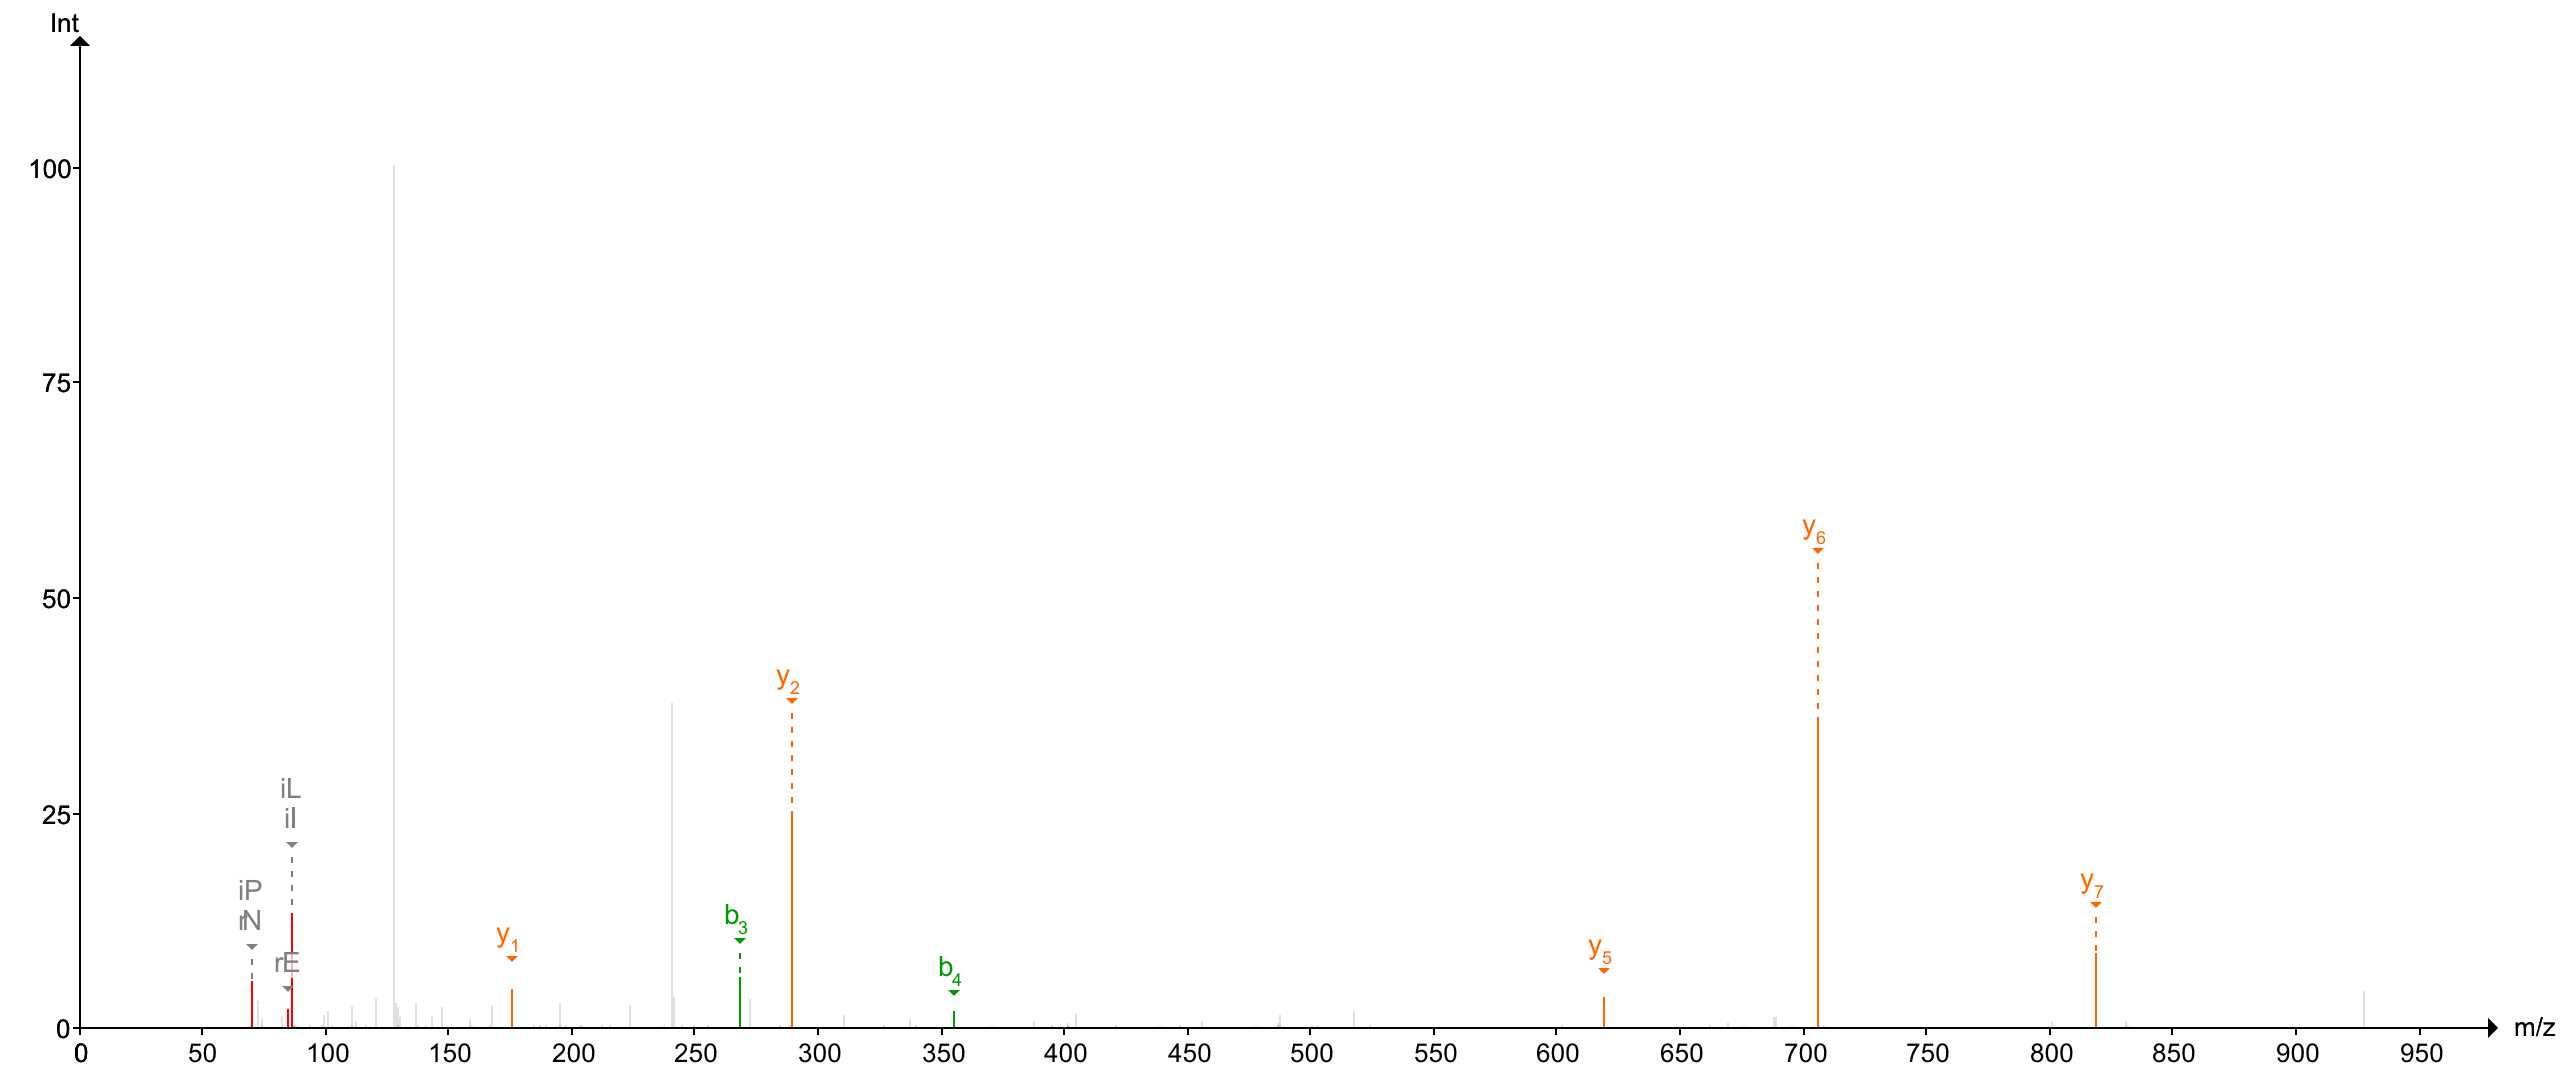



NH<sub>2</sub>-T A L E **M** V Q A A G T D R-COOH

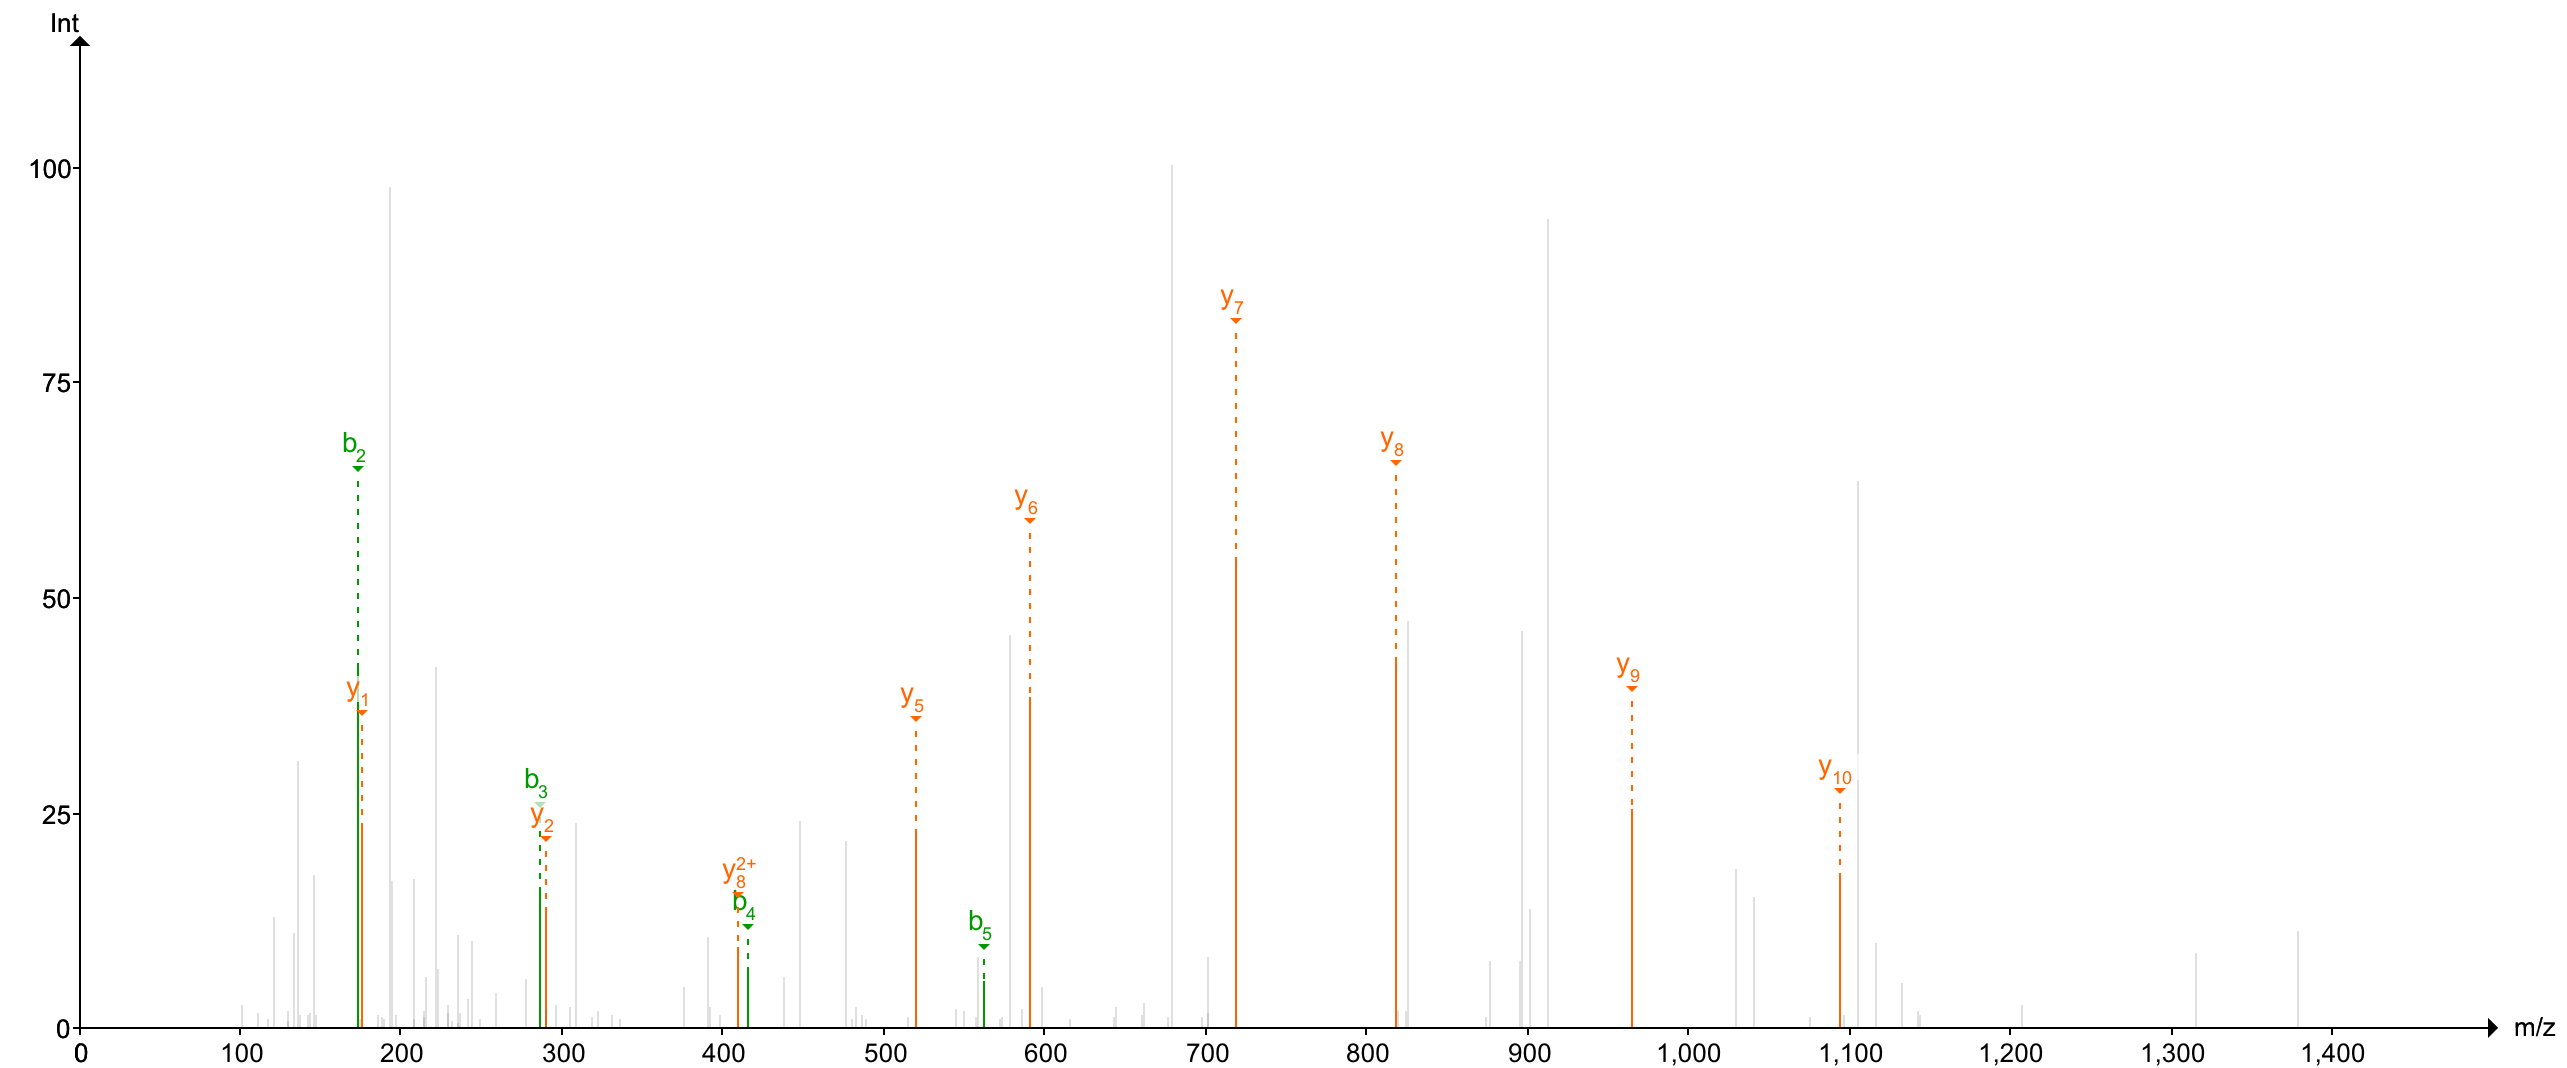

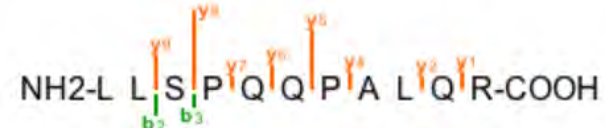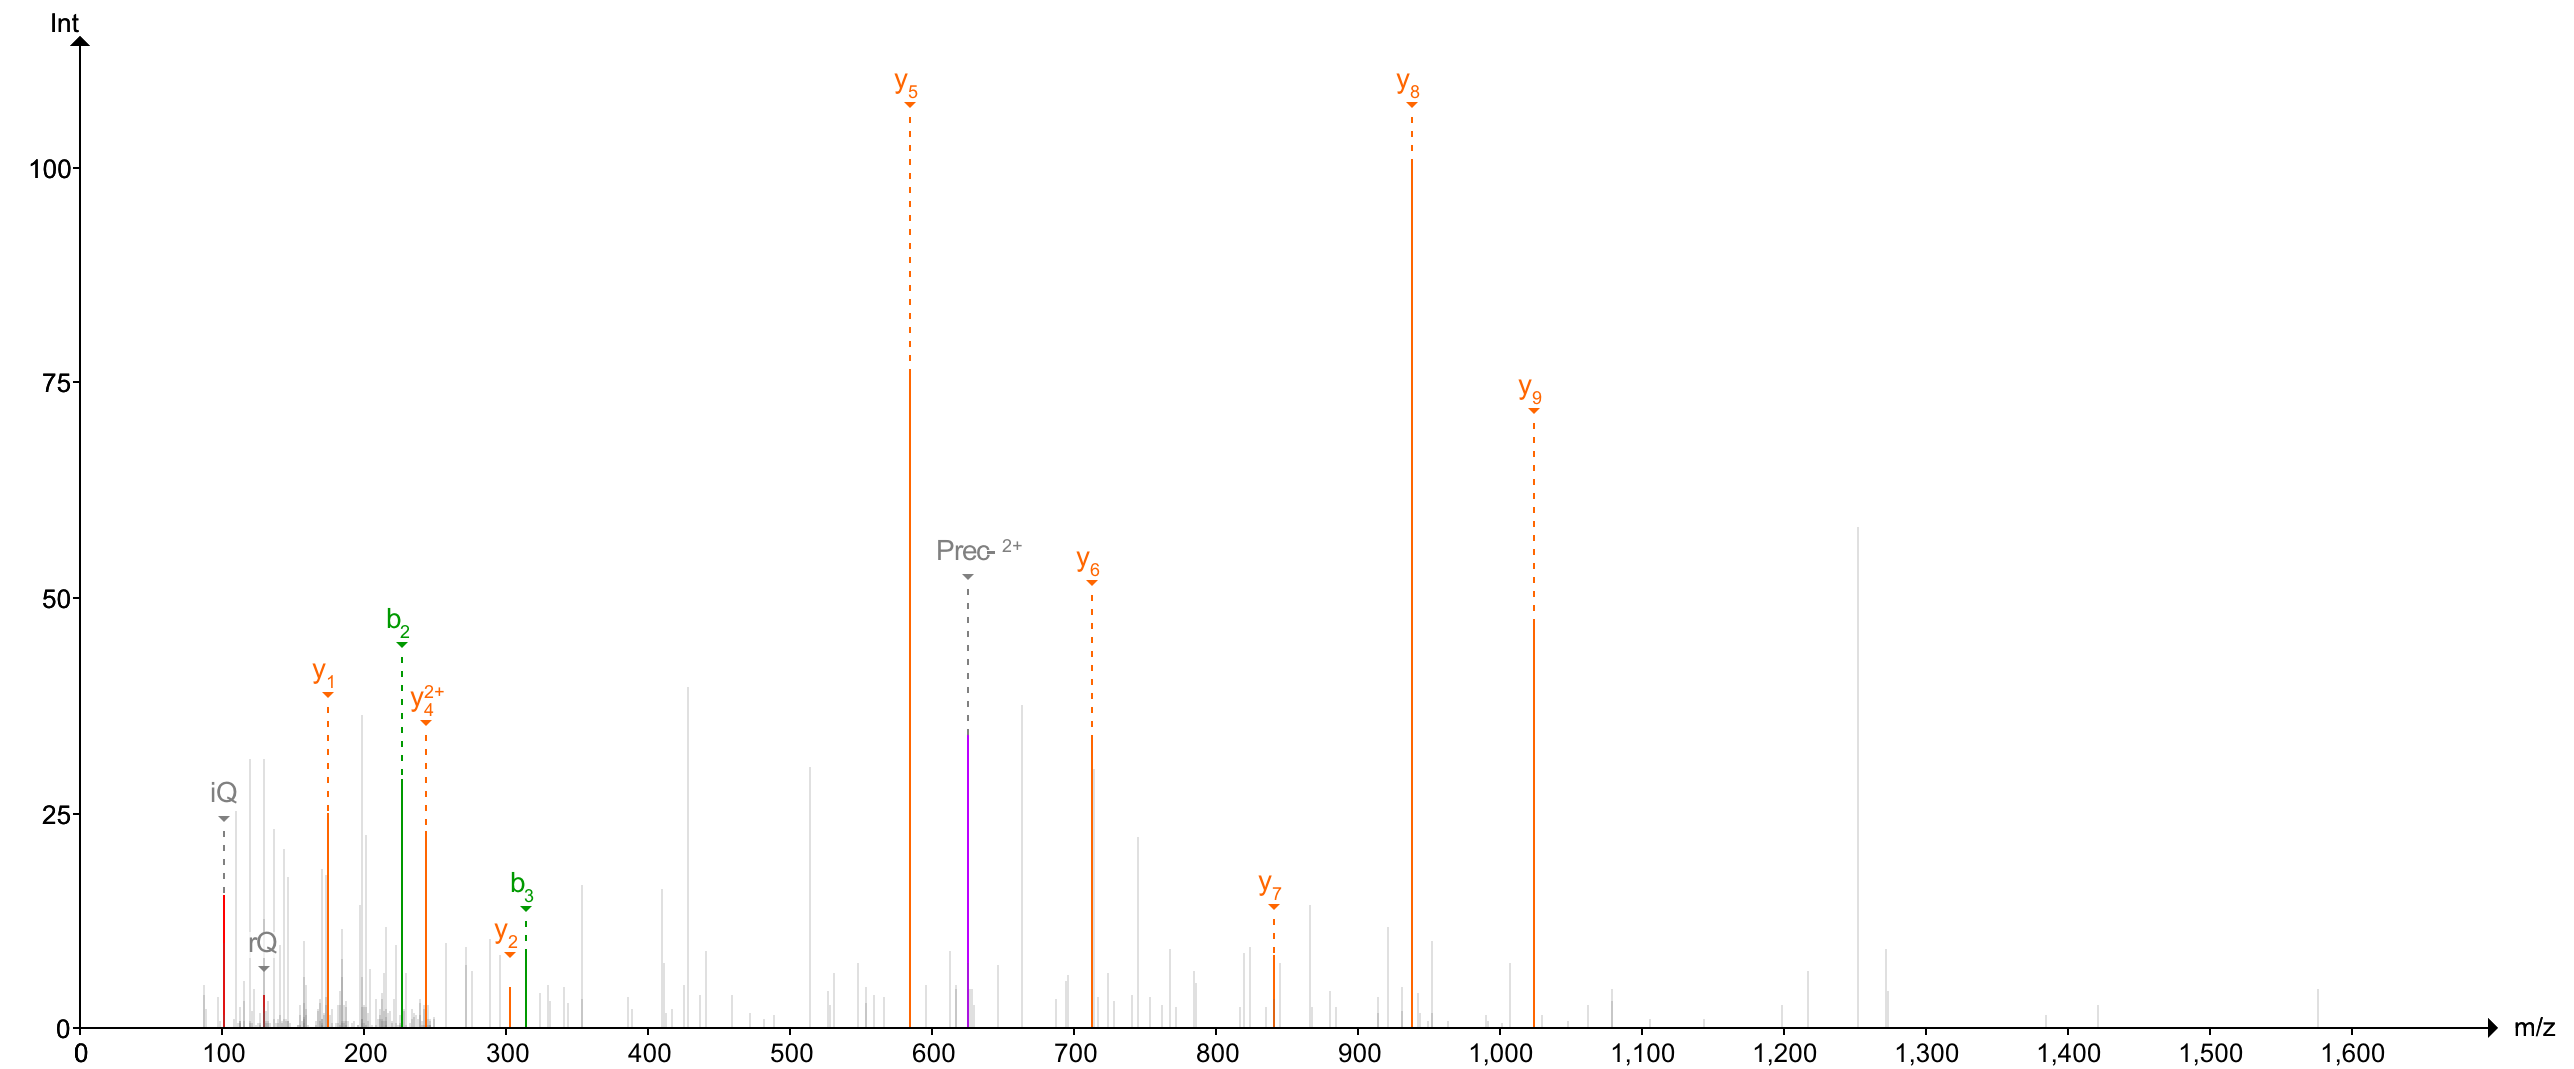

NH<sub>2</sub>-I<sup>y<sub>9</sub></sup>F<sup>y<sub>8</sub></sup>L<sup>y<sub>7</sub></sup>D<sup>y<sub>6</sub></sup>H<sup>y<sub>5</sub></sup>I<sup>y<sub>4</sub></sup>G<sup>y<sub>3</sub></sup>G<sup>y<sub>1</sub></sup>T-R-COOH  
b<sub>2</sub> b<sub>5</sub>

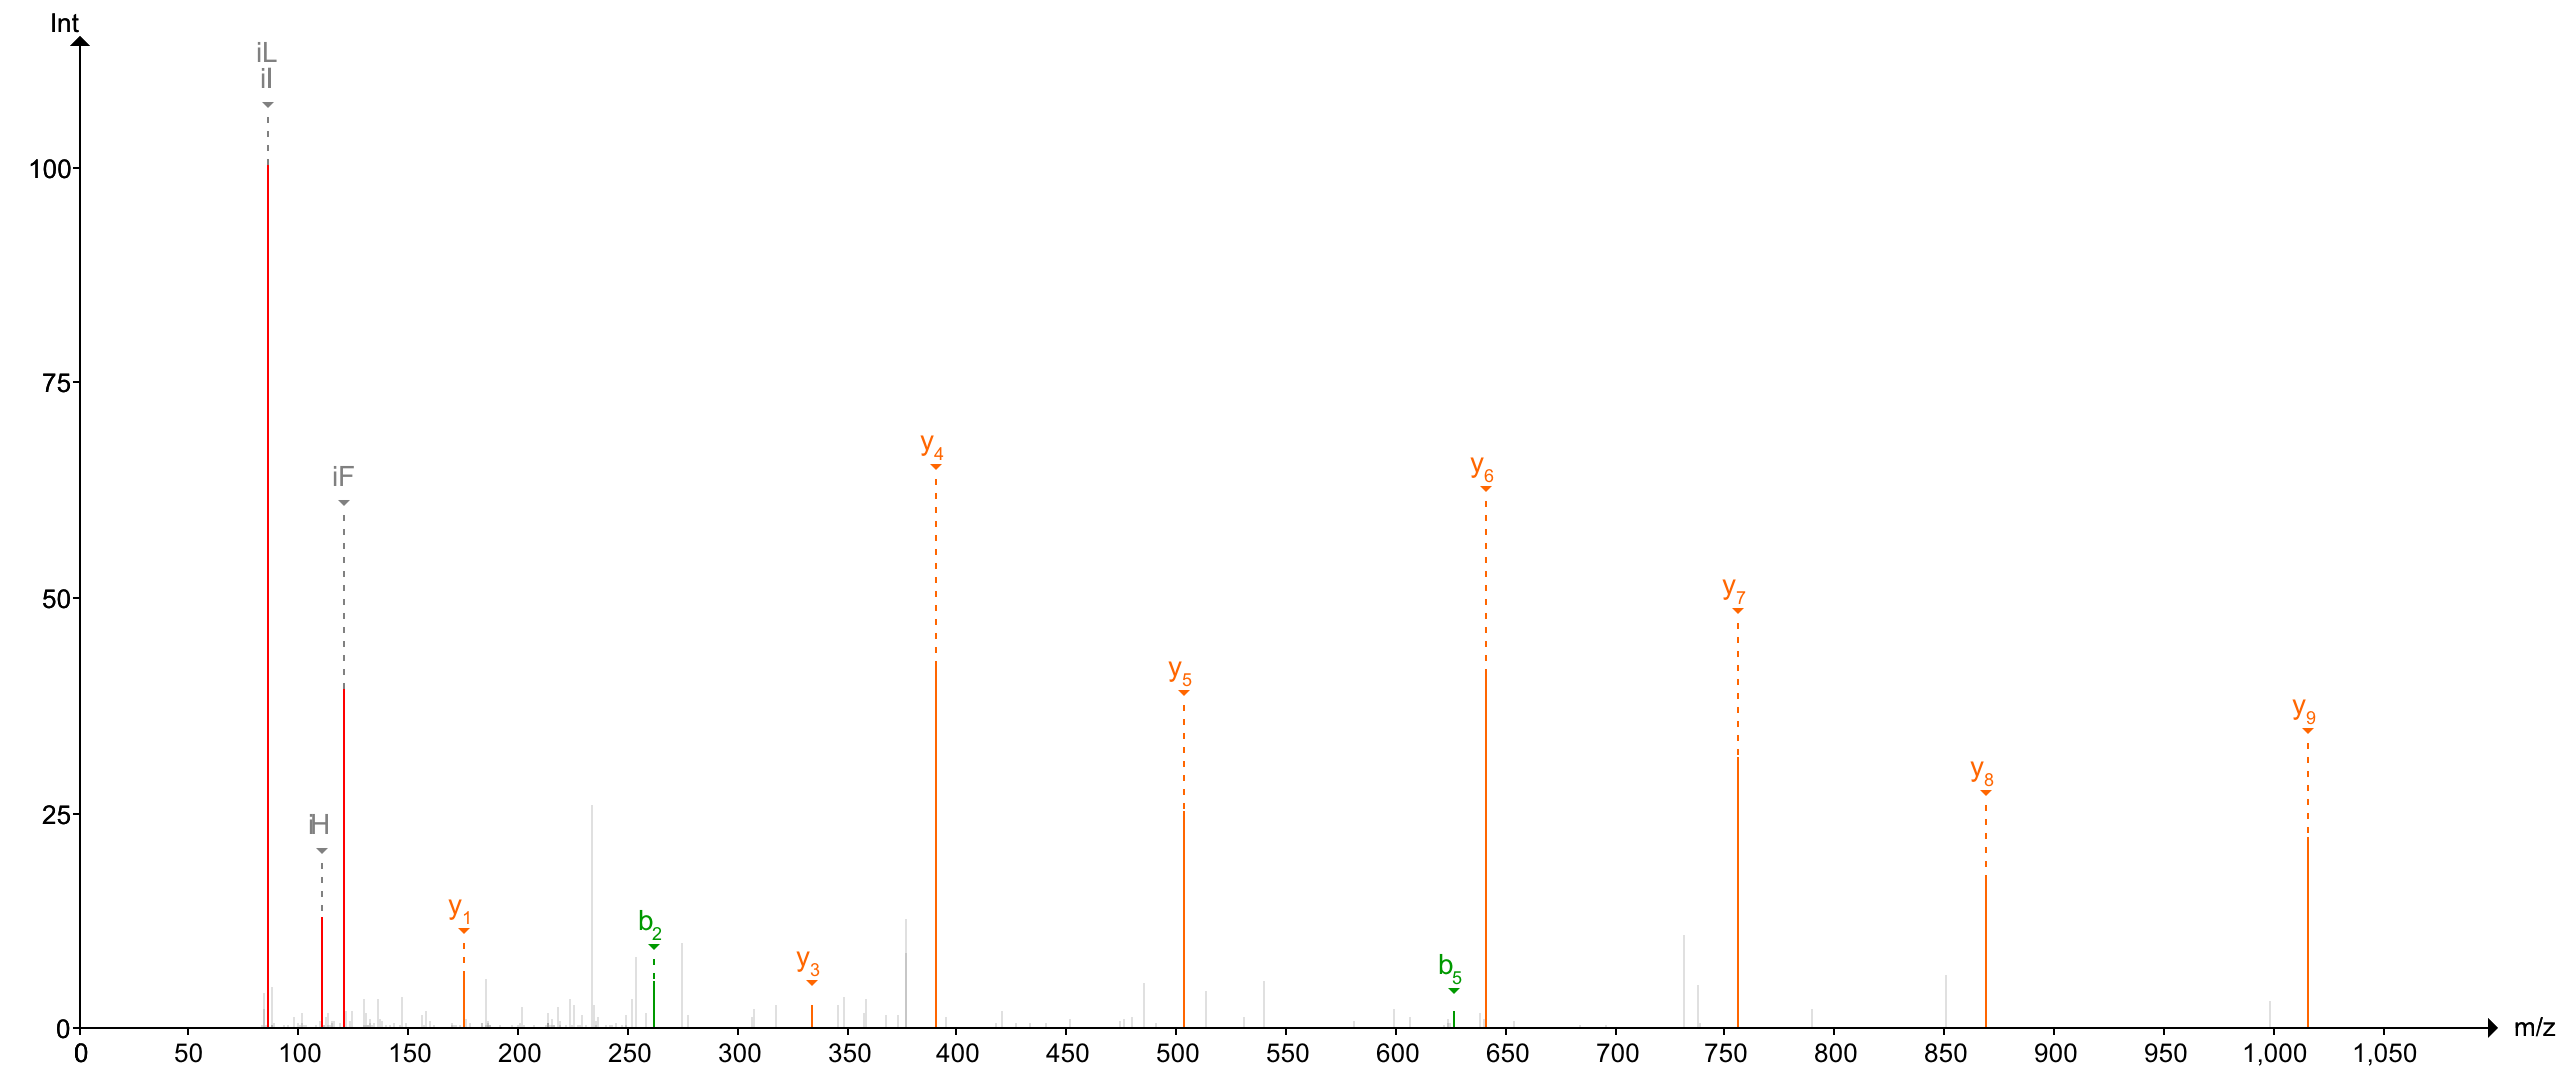

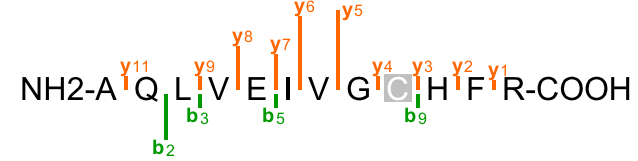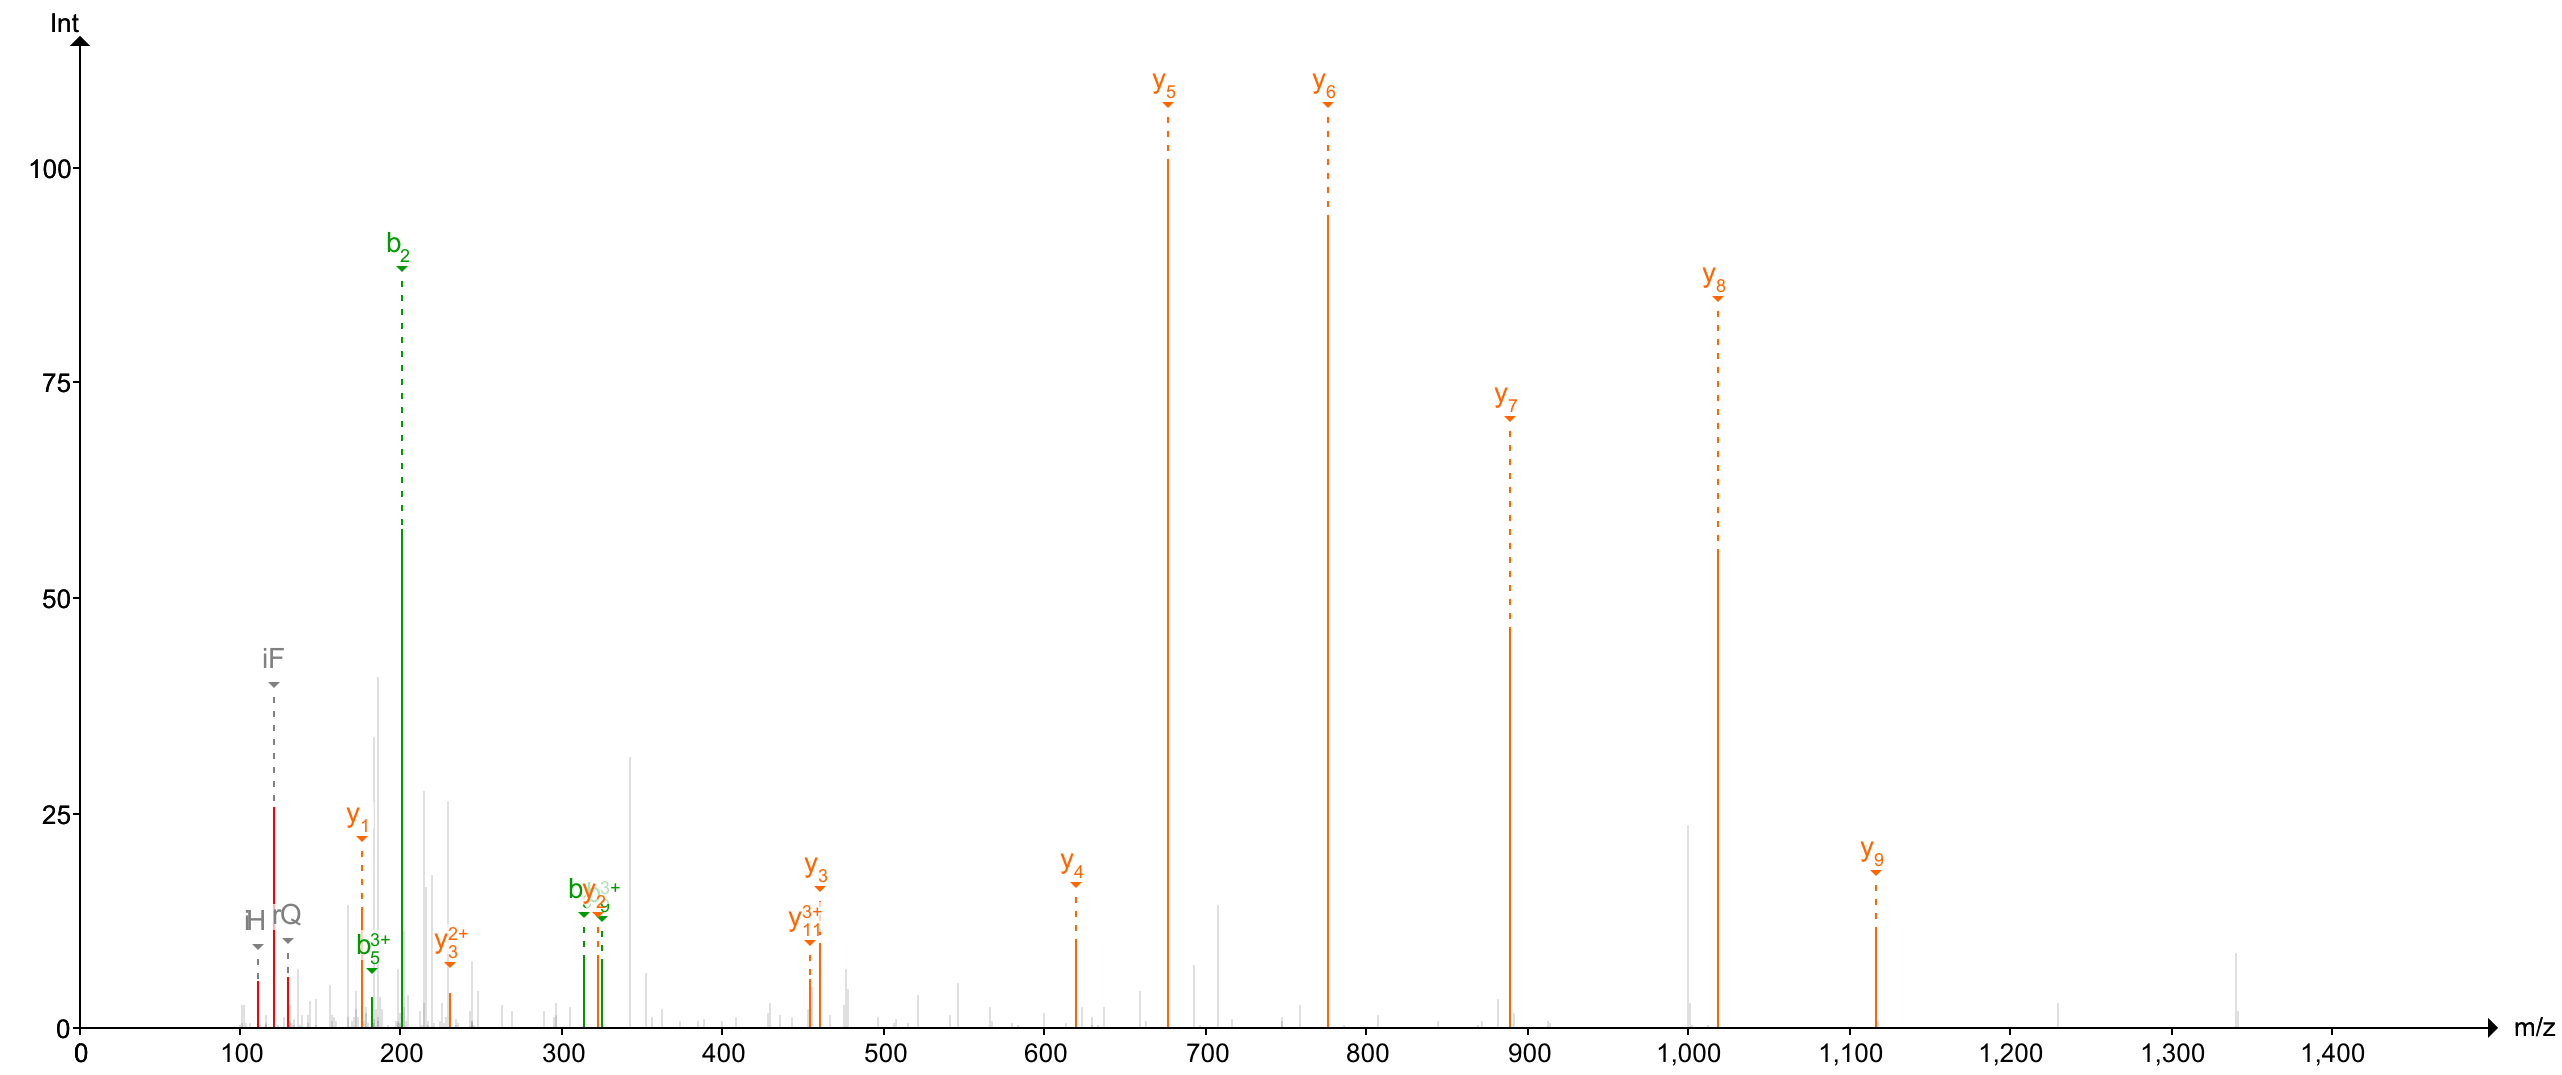

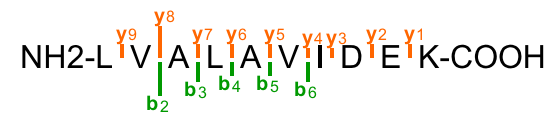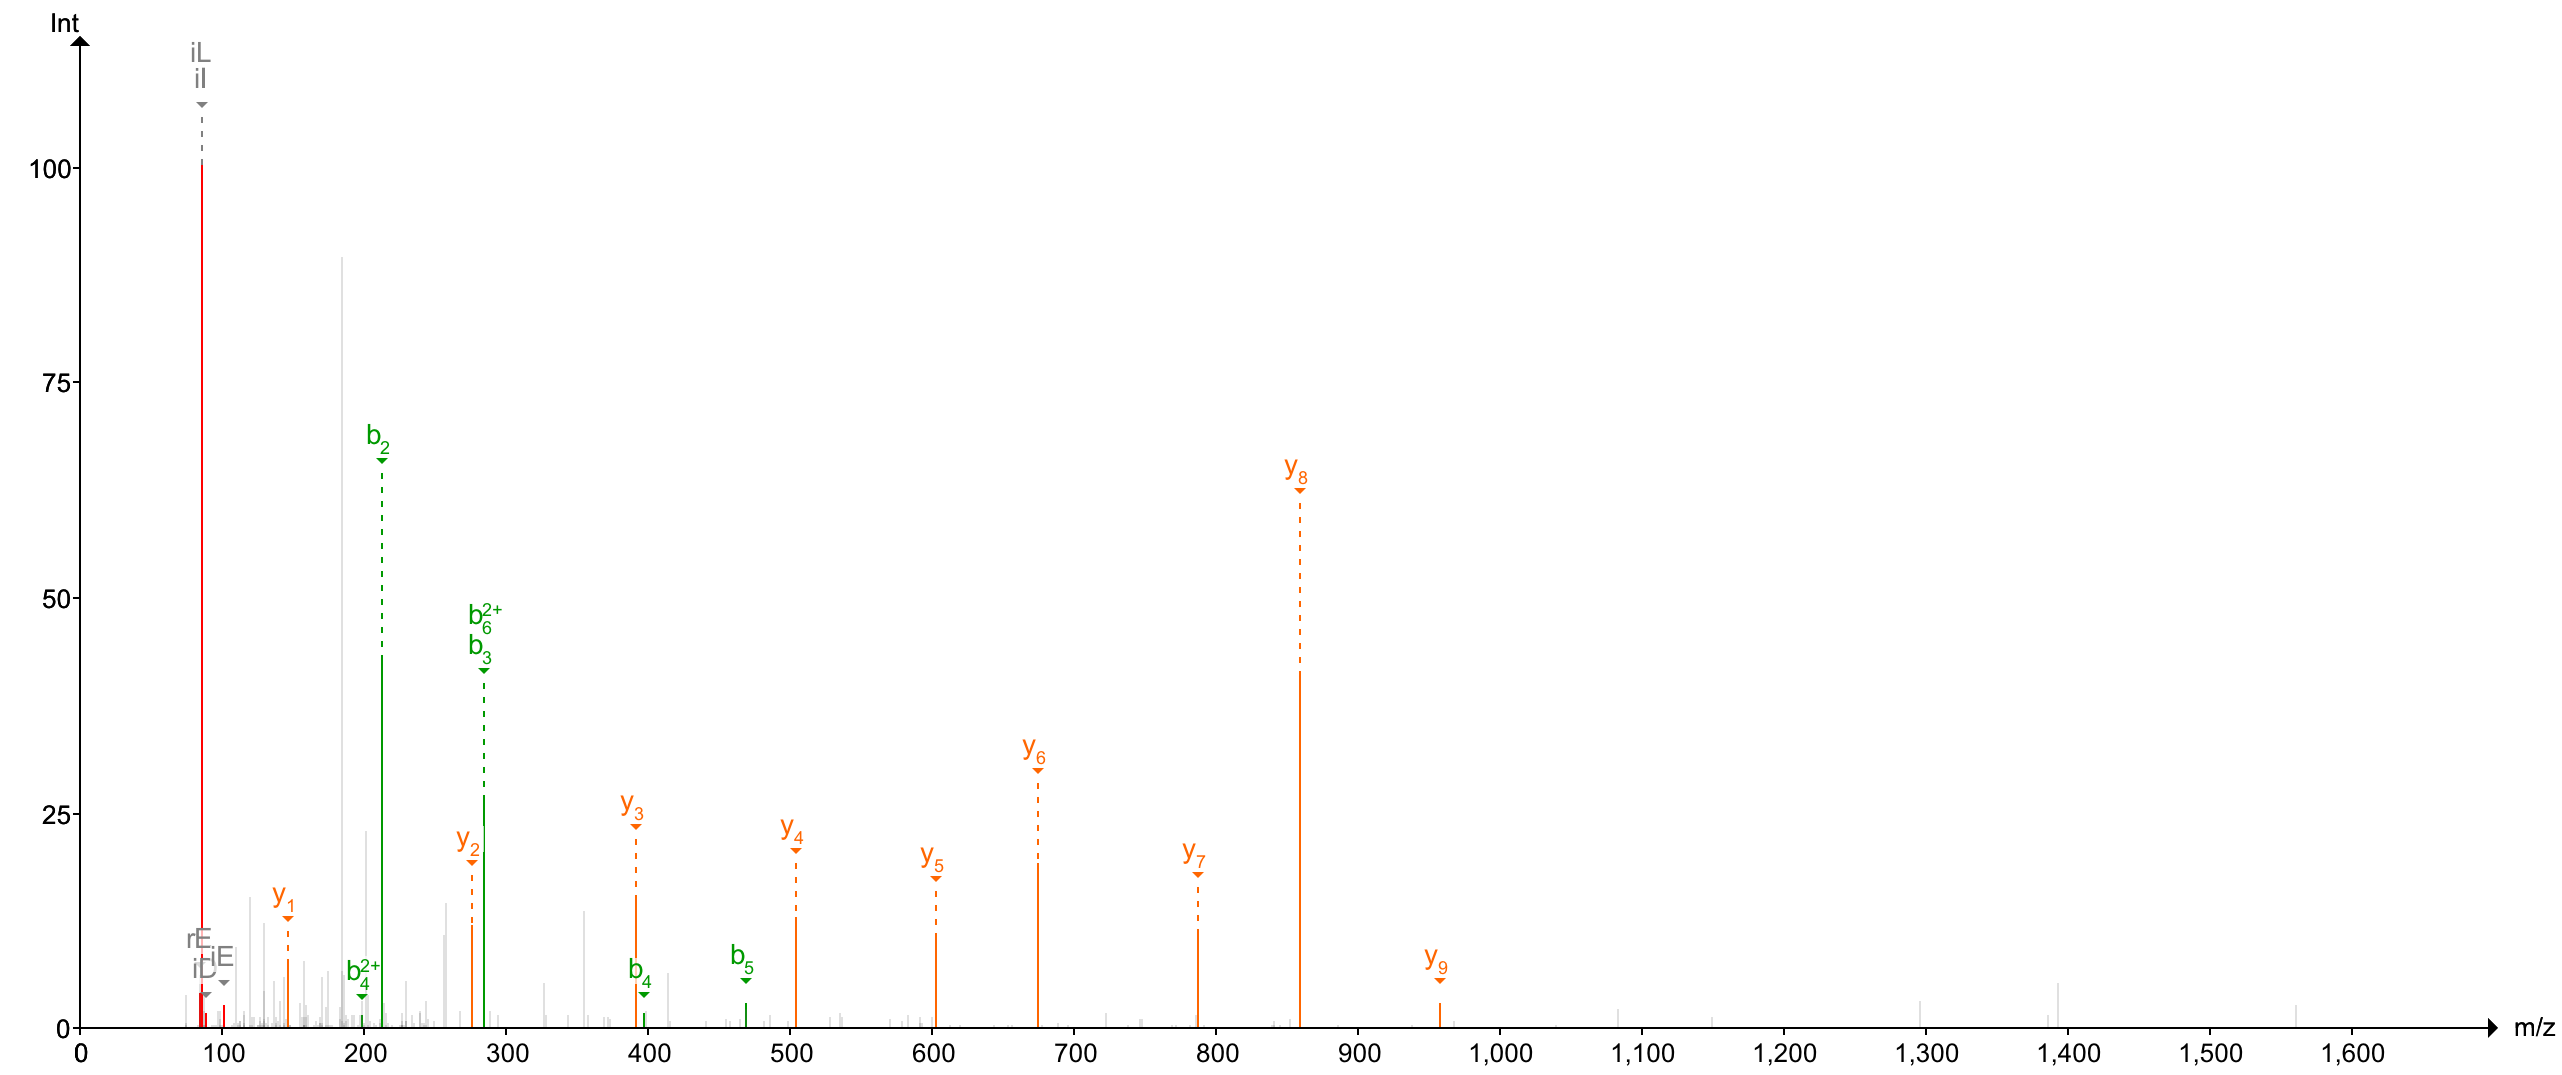

NH<sub>2</sub>-P D V I T L L E Q E K E P W I V M R-COOH

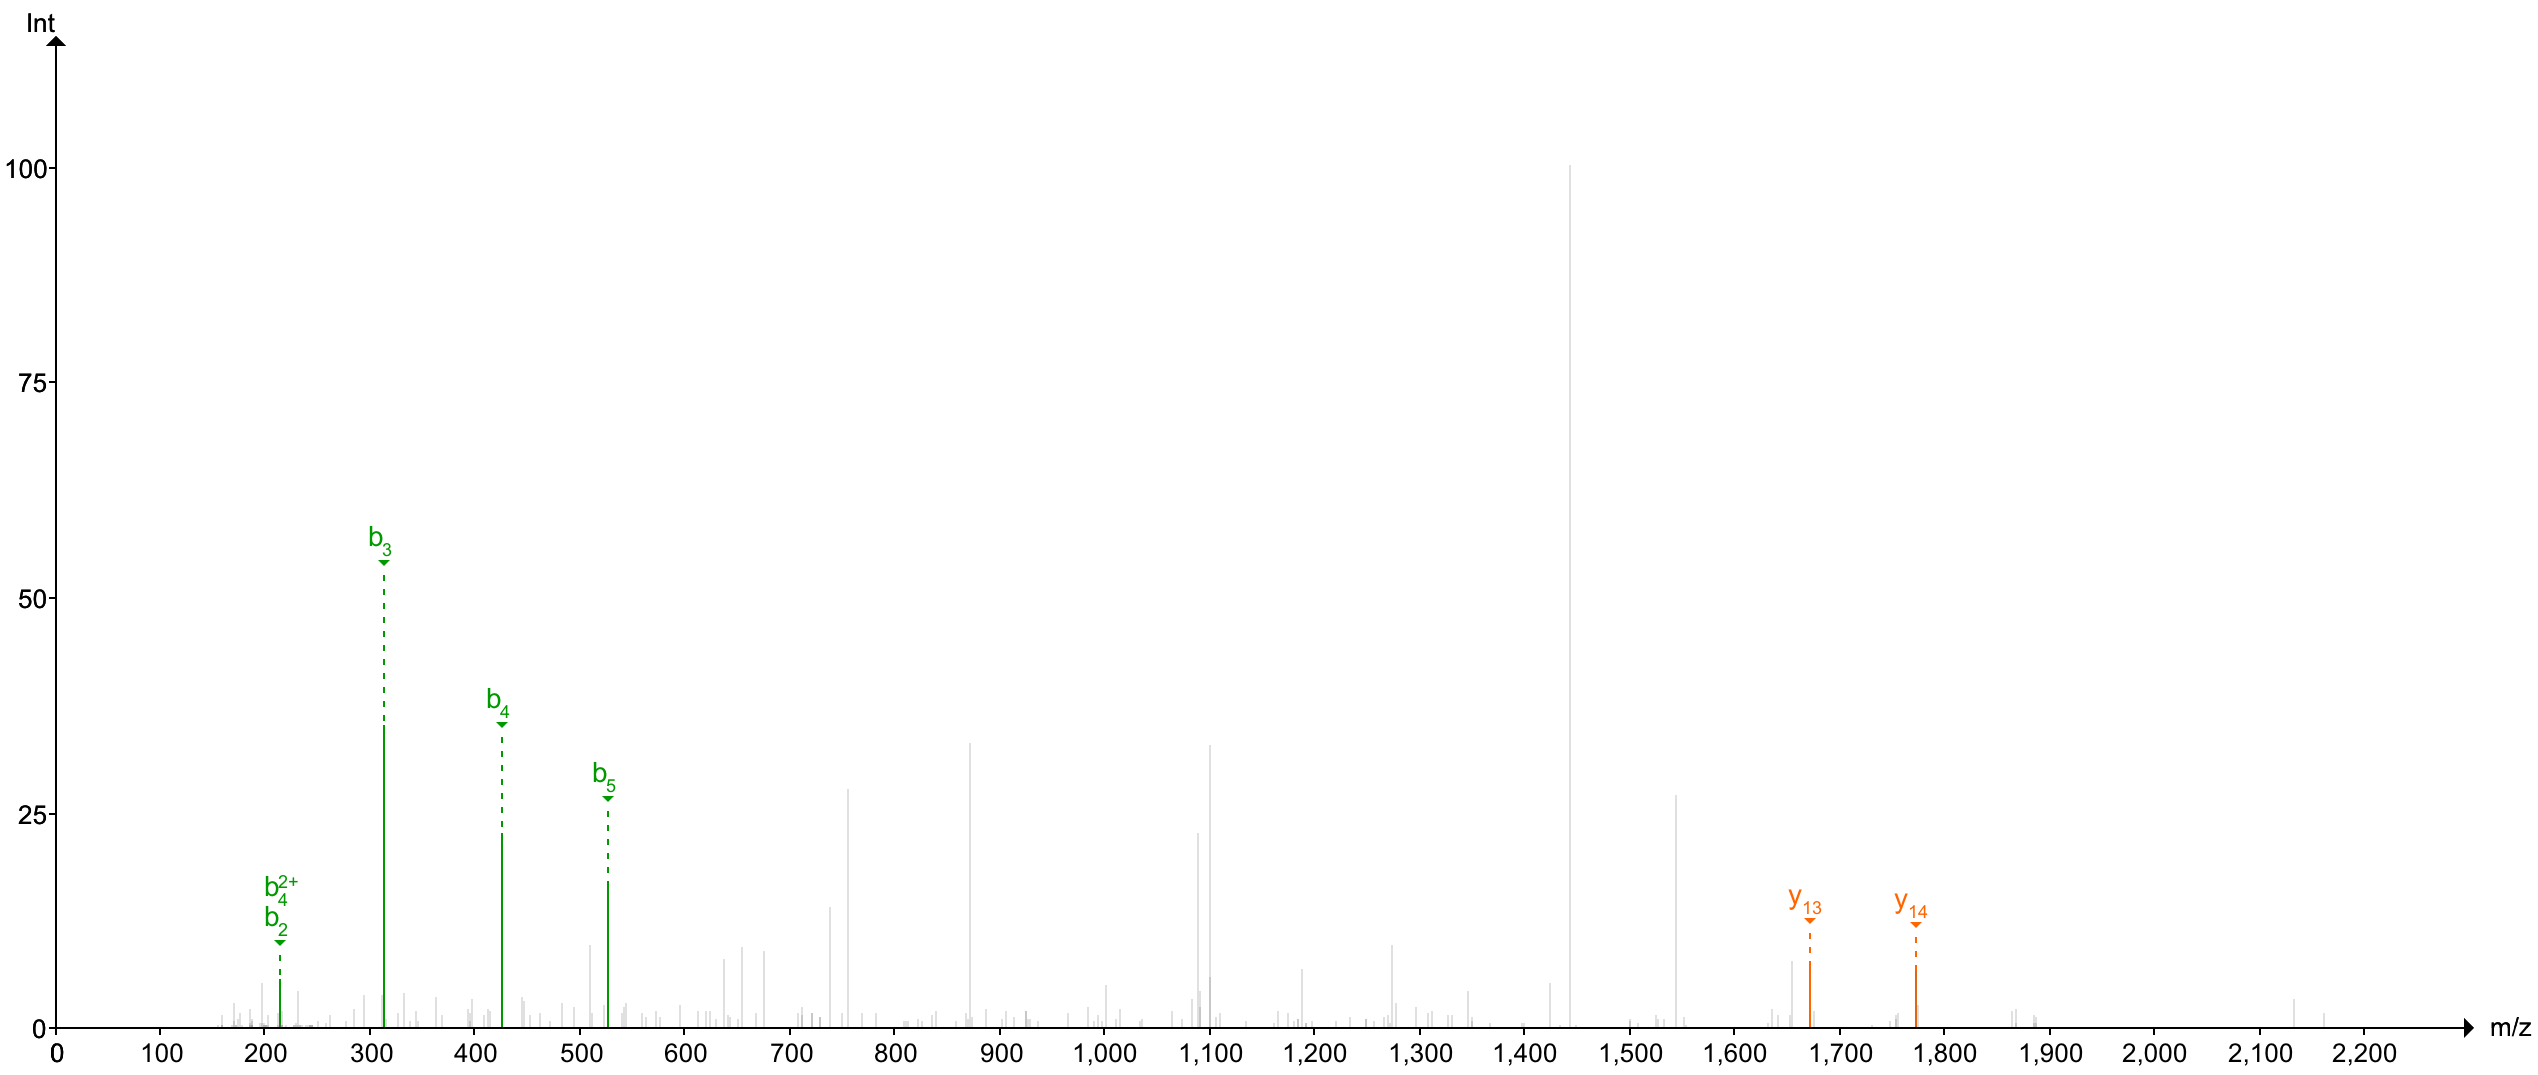

NH<sub>2</sub>-D V<sup>y<sub>10</sub></sup> Q<sup>y<sub>9</sub></sup> E<sup>y<sub>8</sub></sup> I<sup>y<sub>7</sub></sup> A<sup>y<sub>6</sub></sup> T<sup>y<sub>5</sub></sup> V<sup>y<sub>4</sub></sup> V<sup>y<sub>3</sub></sup> V<sup>y<sub>2</sub></sup> P<sup>y<sub>1</sub></sup> K-COOH  
b<sub>2</sub> b<sub>3</sub> b<sub>4</sub> b<sub>5</sub>

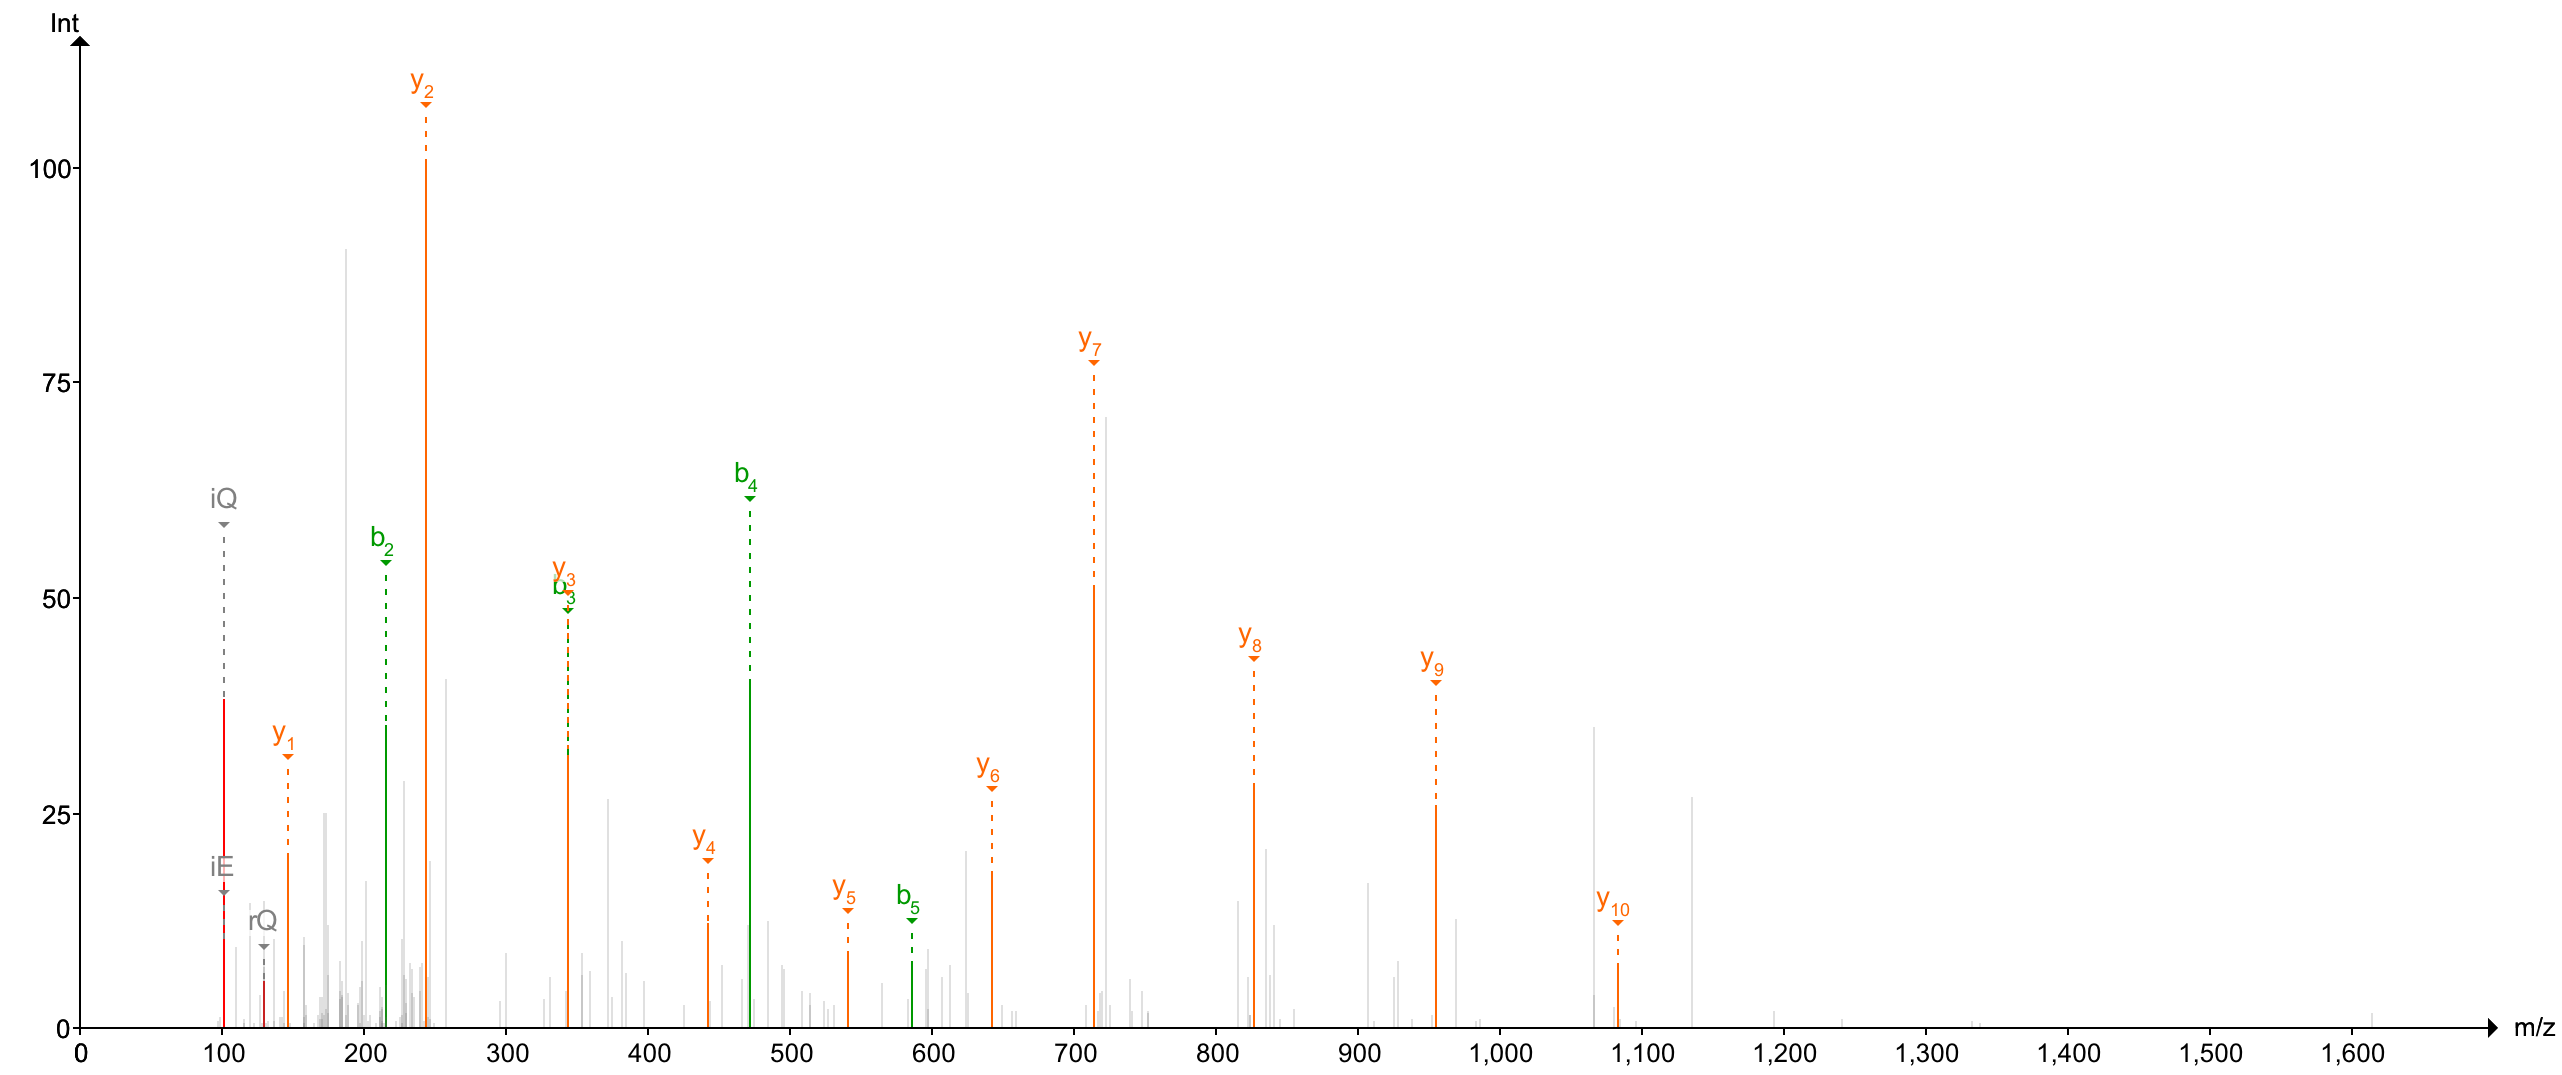

NH<sub>2</sub>-L L I Y G A S T R E A G V P S R-COOH

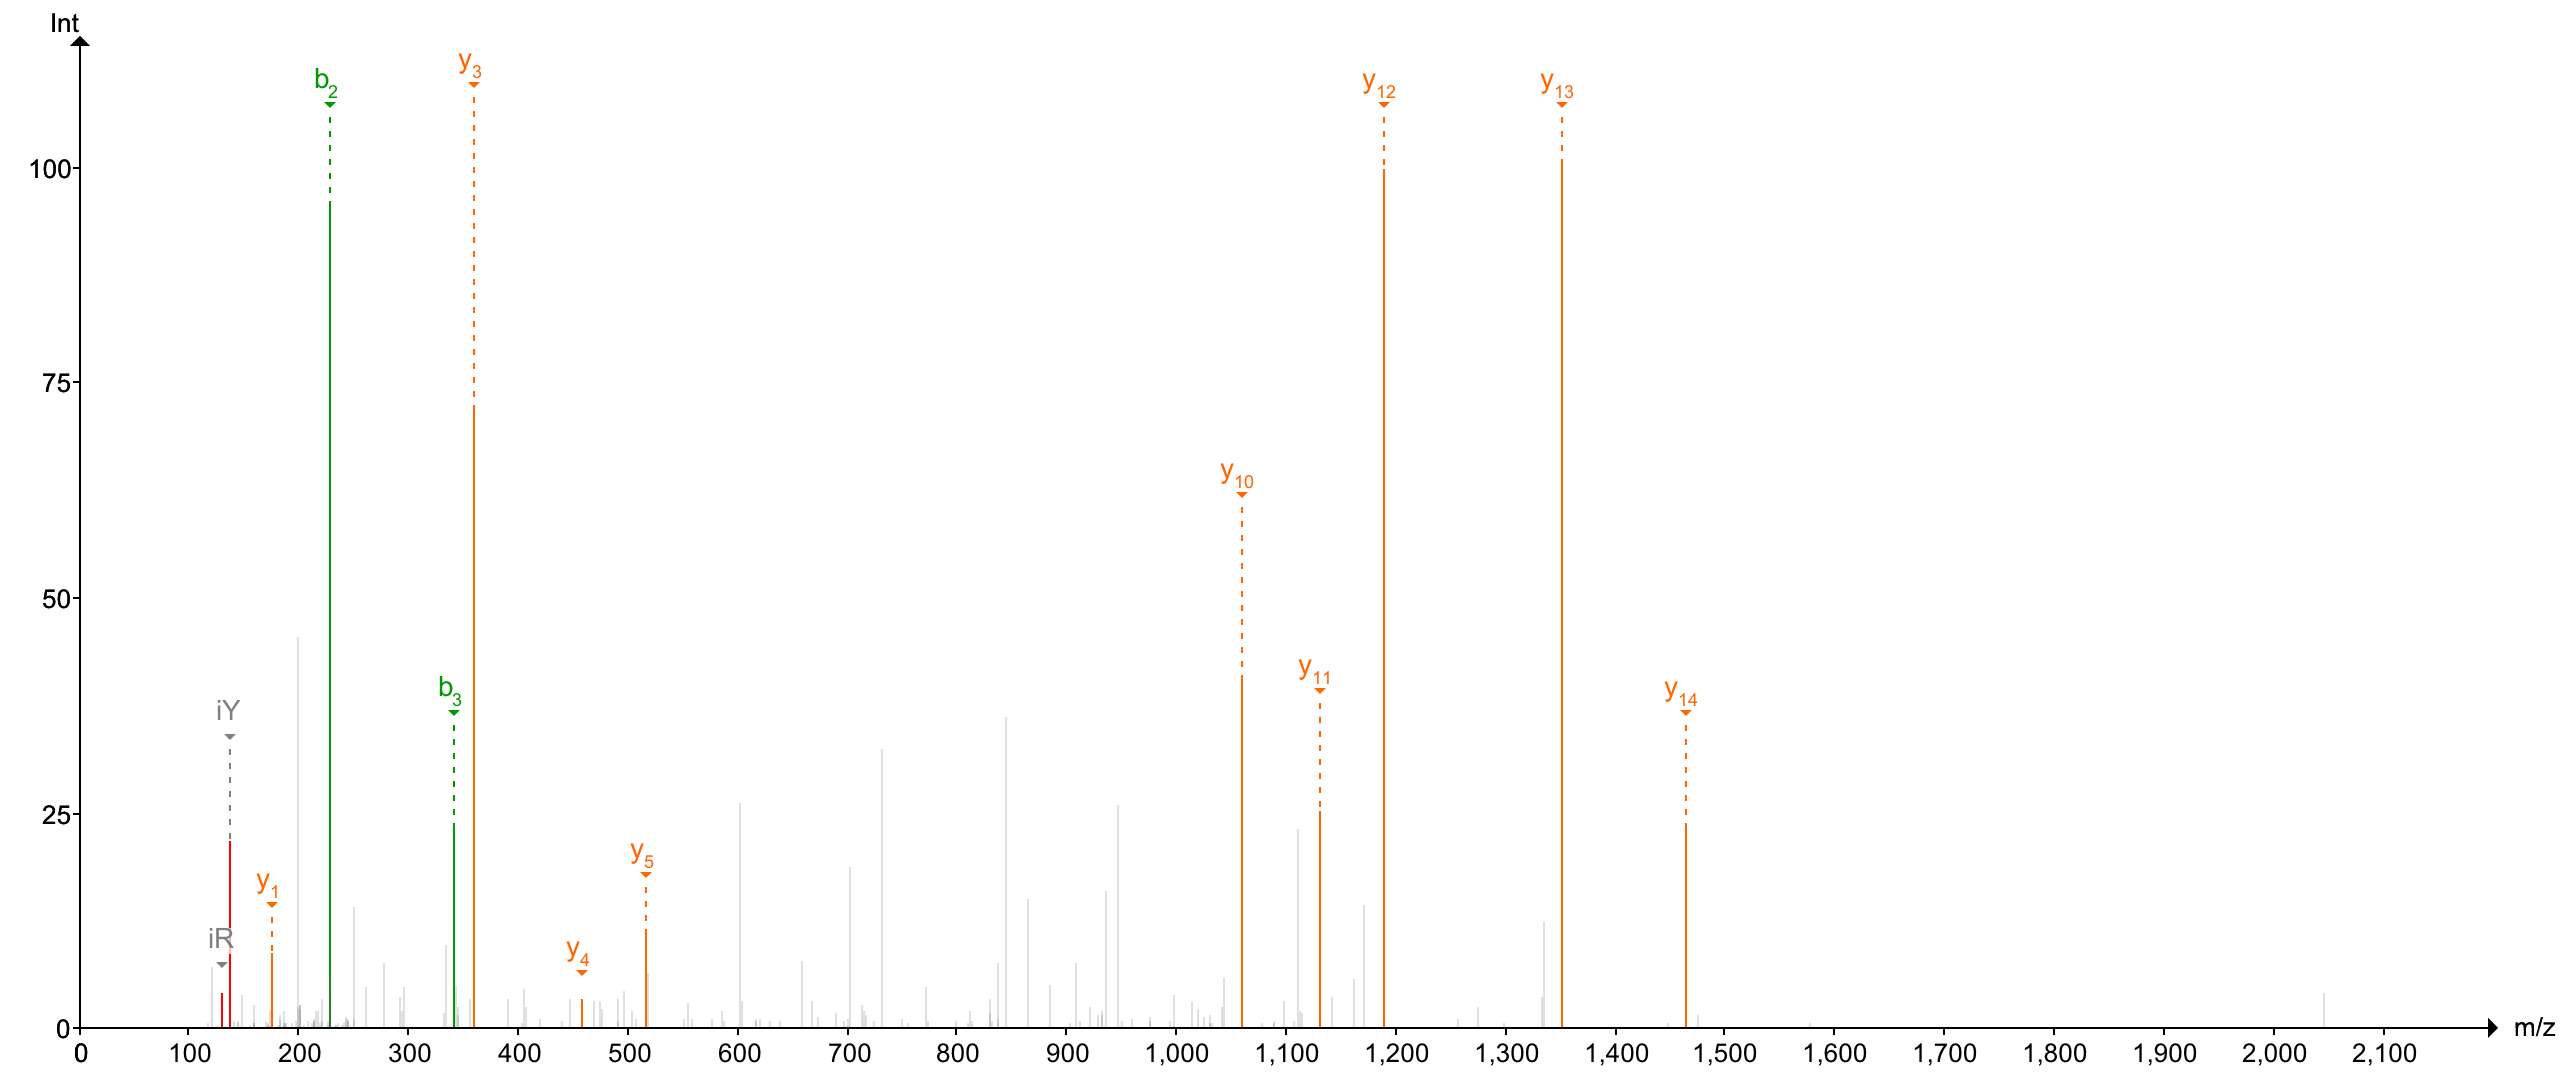



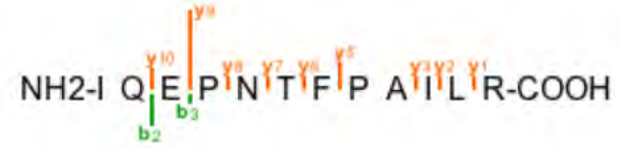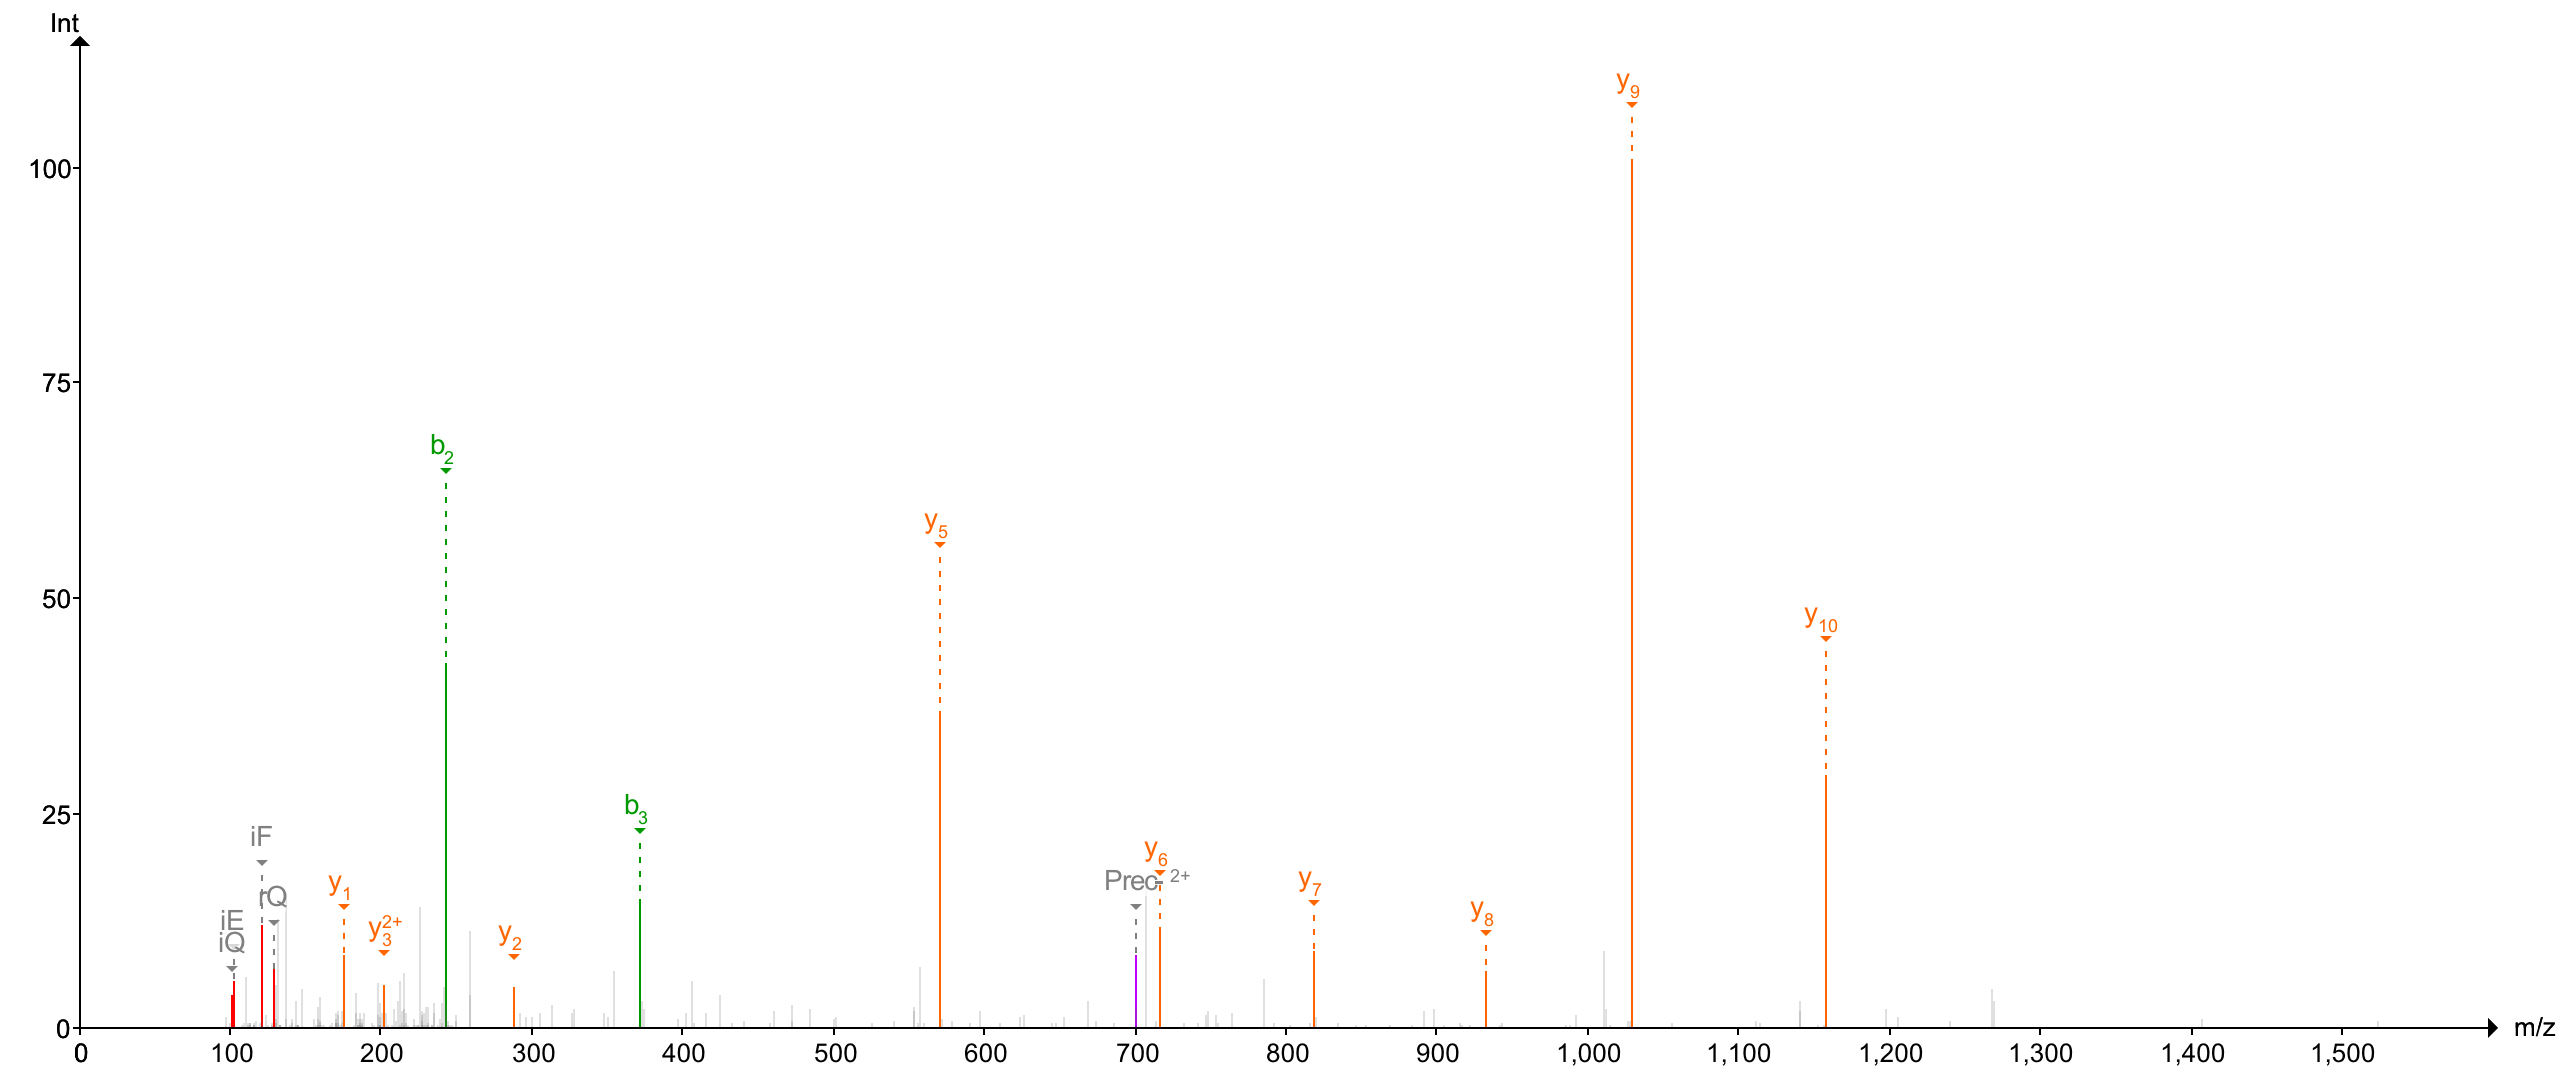

NH<sub>2</sub>-D V S I V A E L L R-COOH

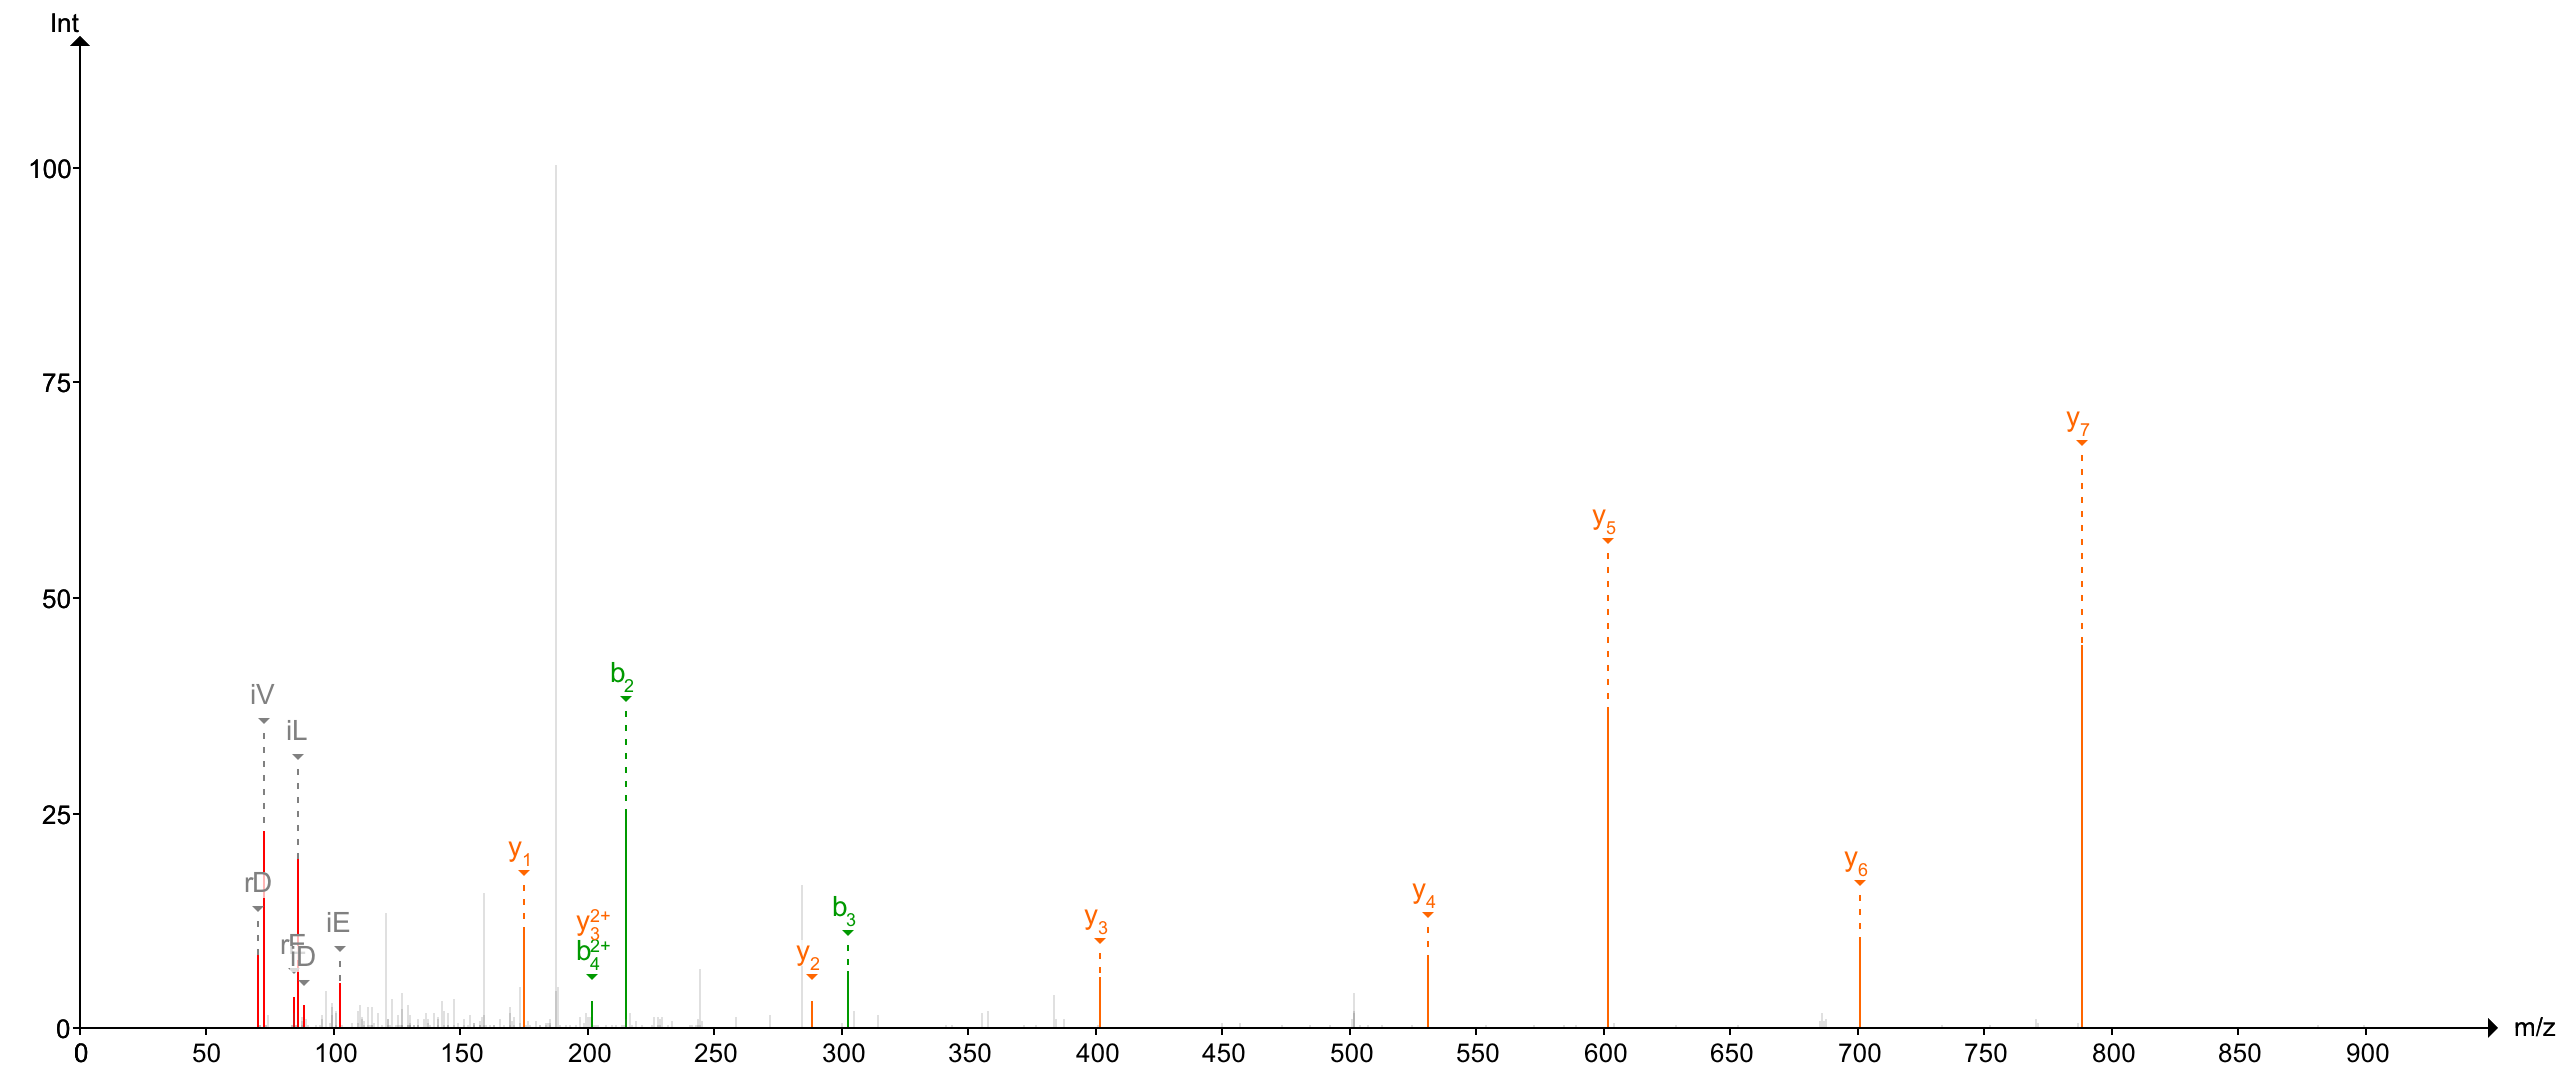

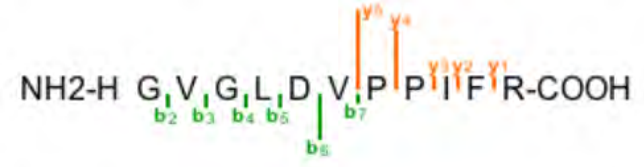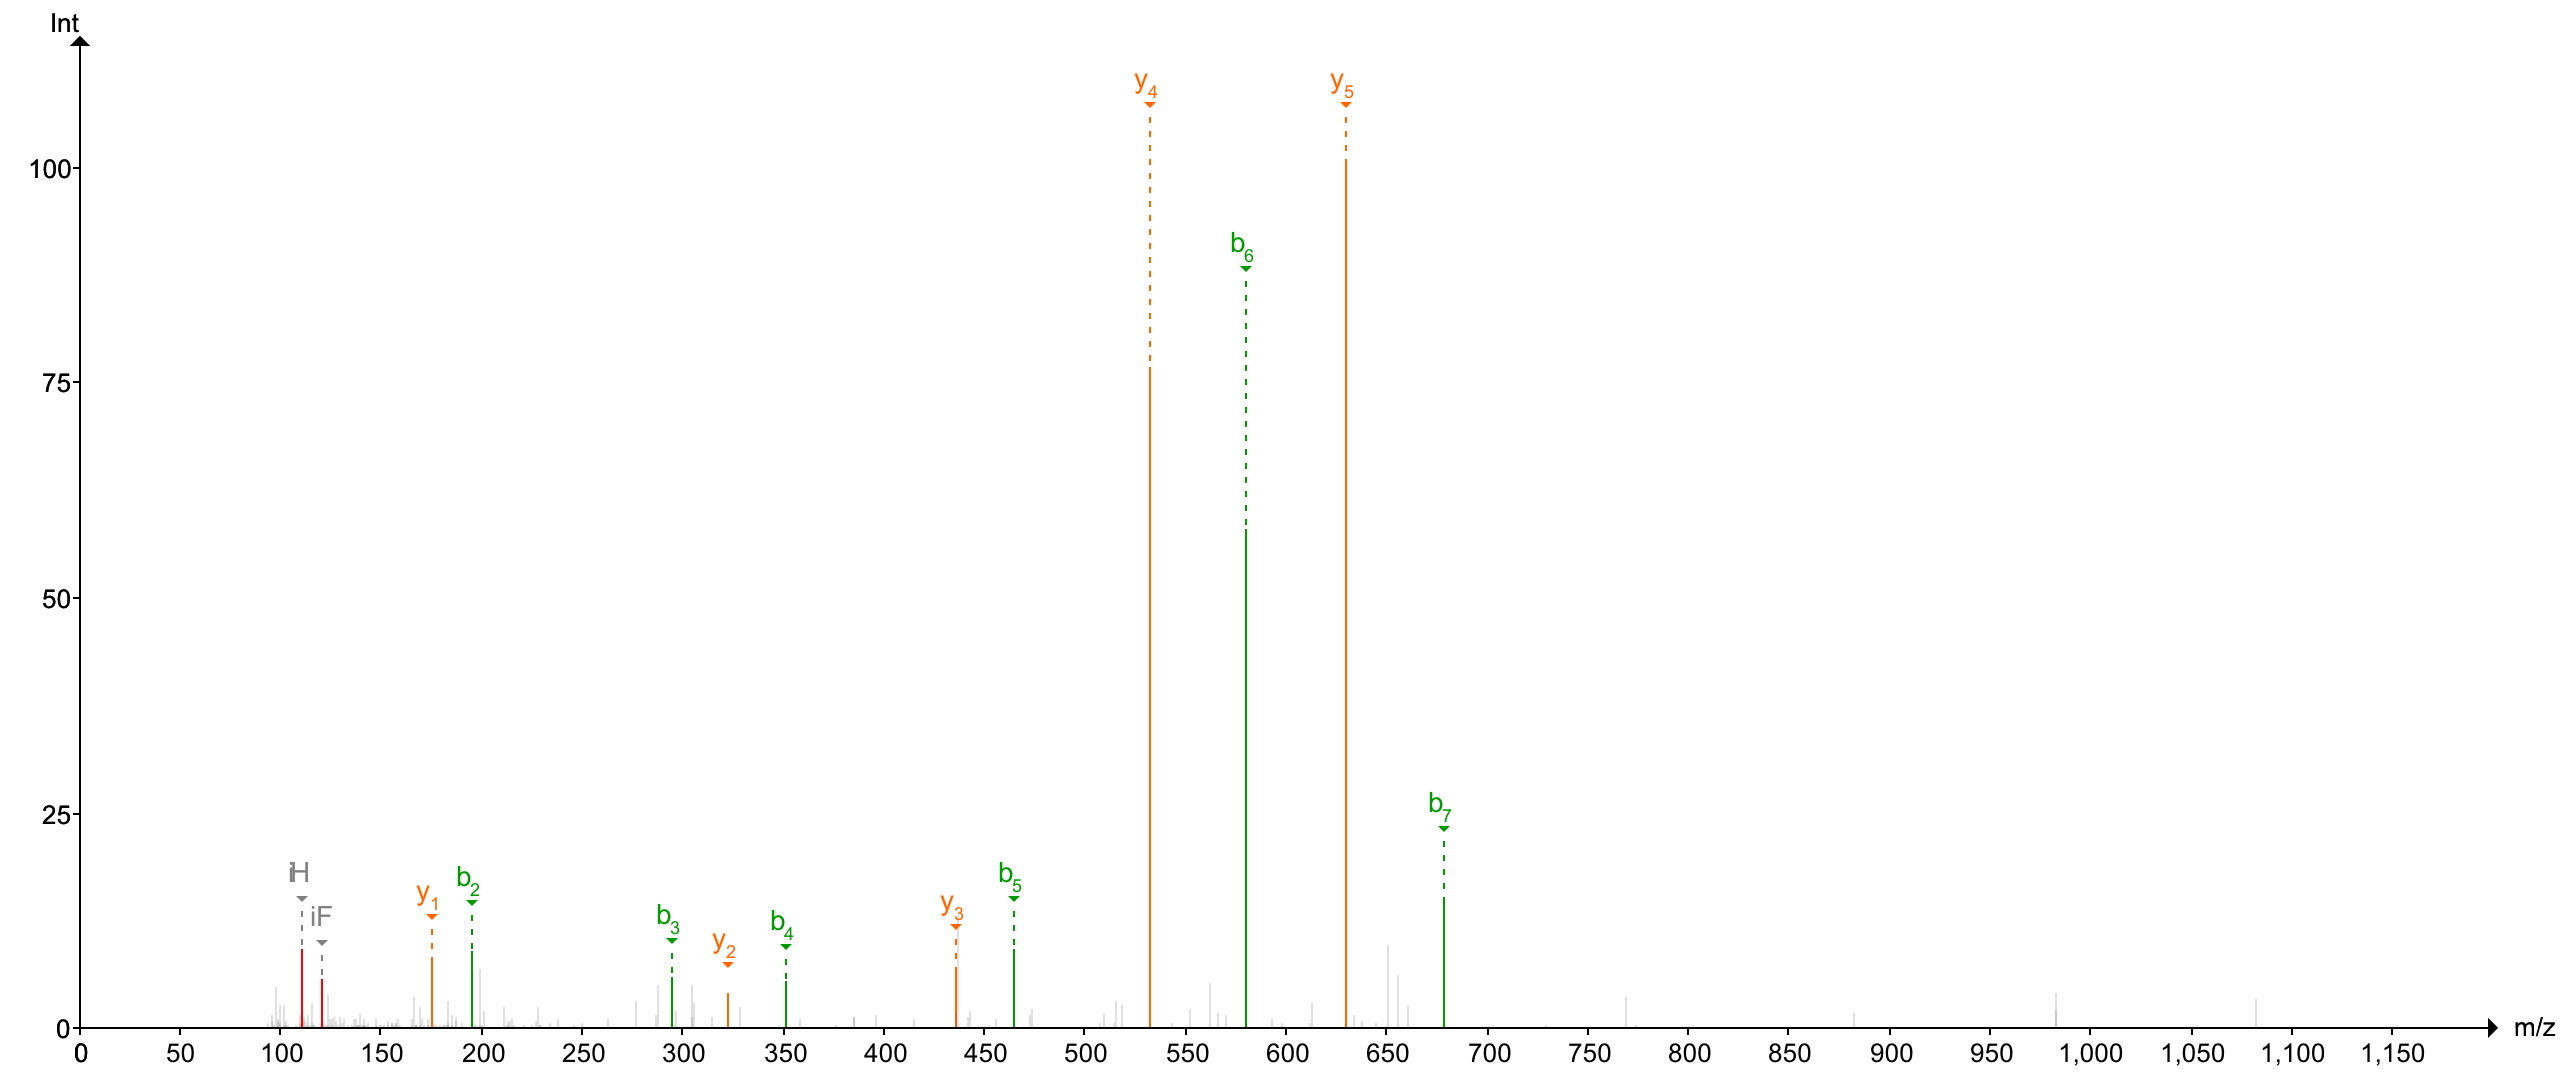

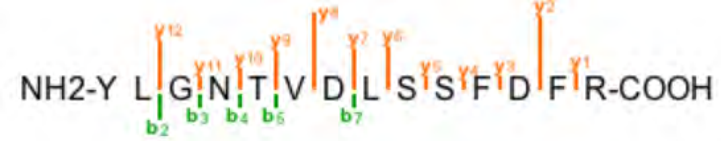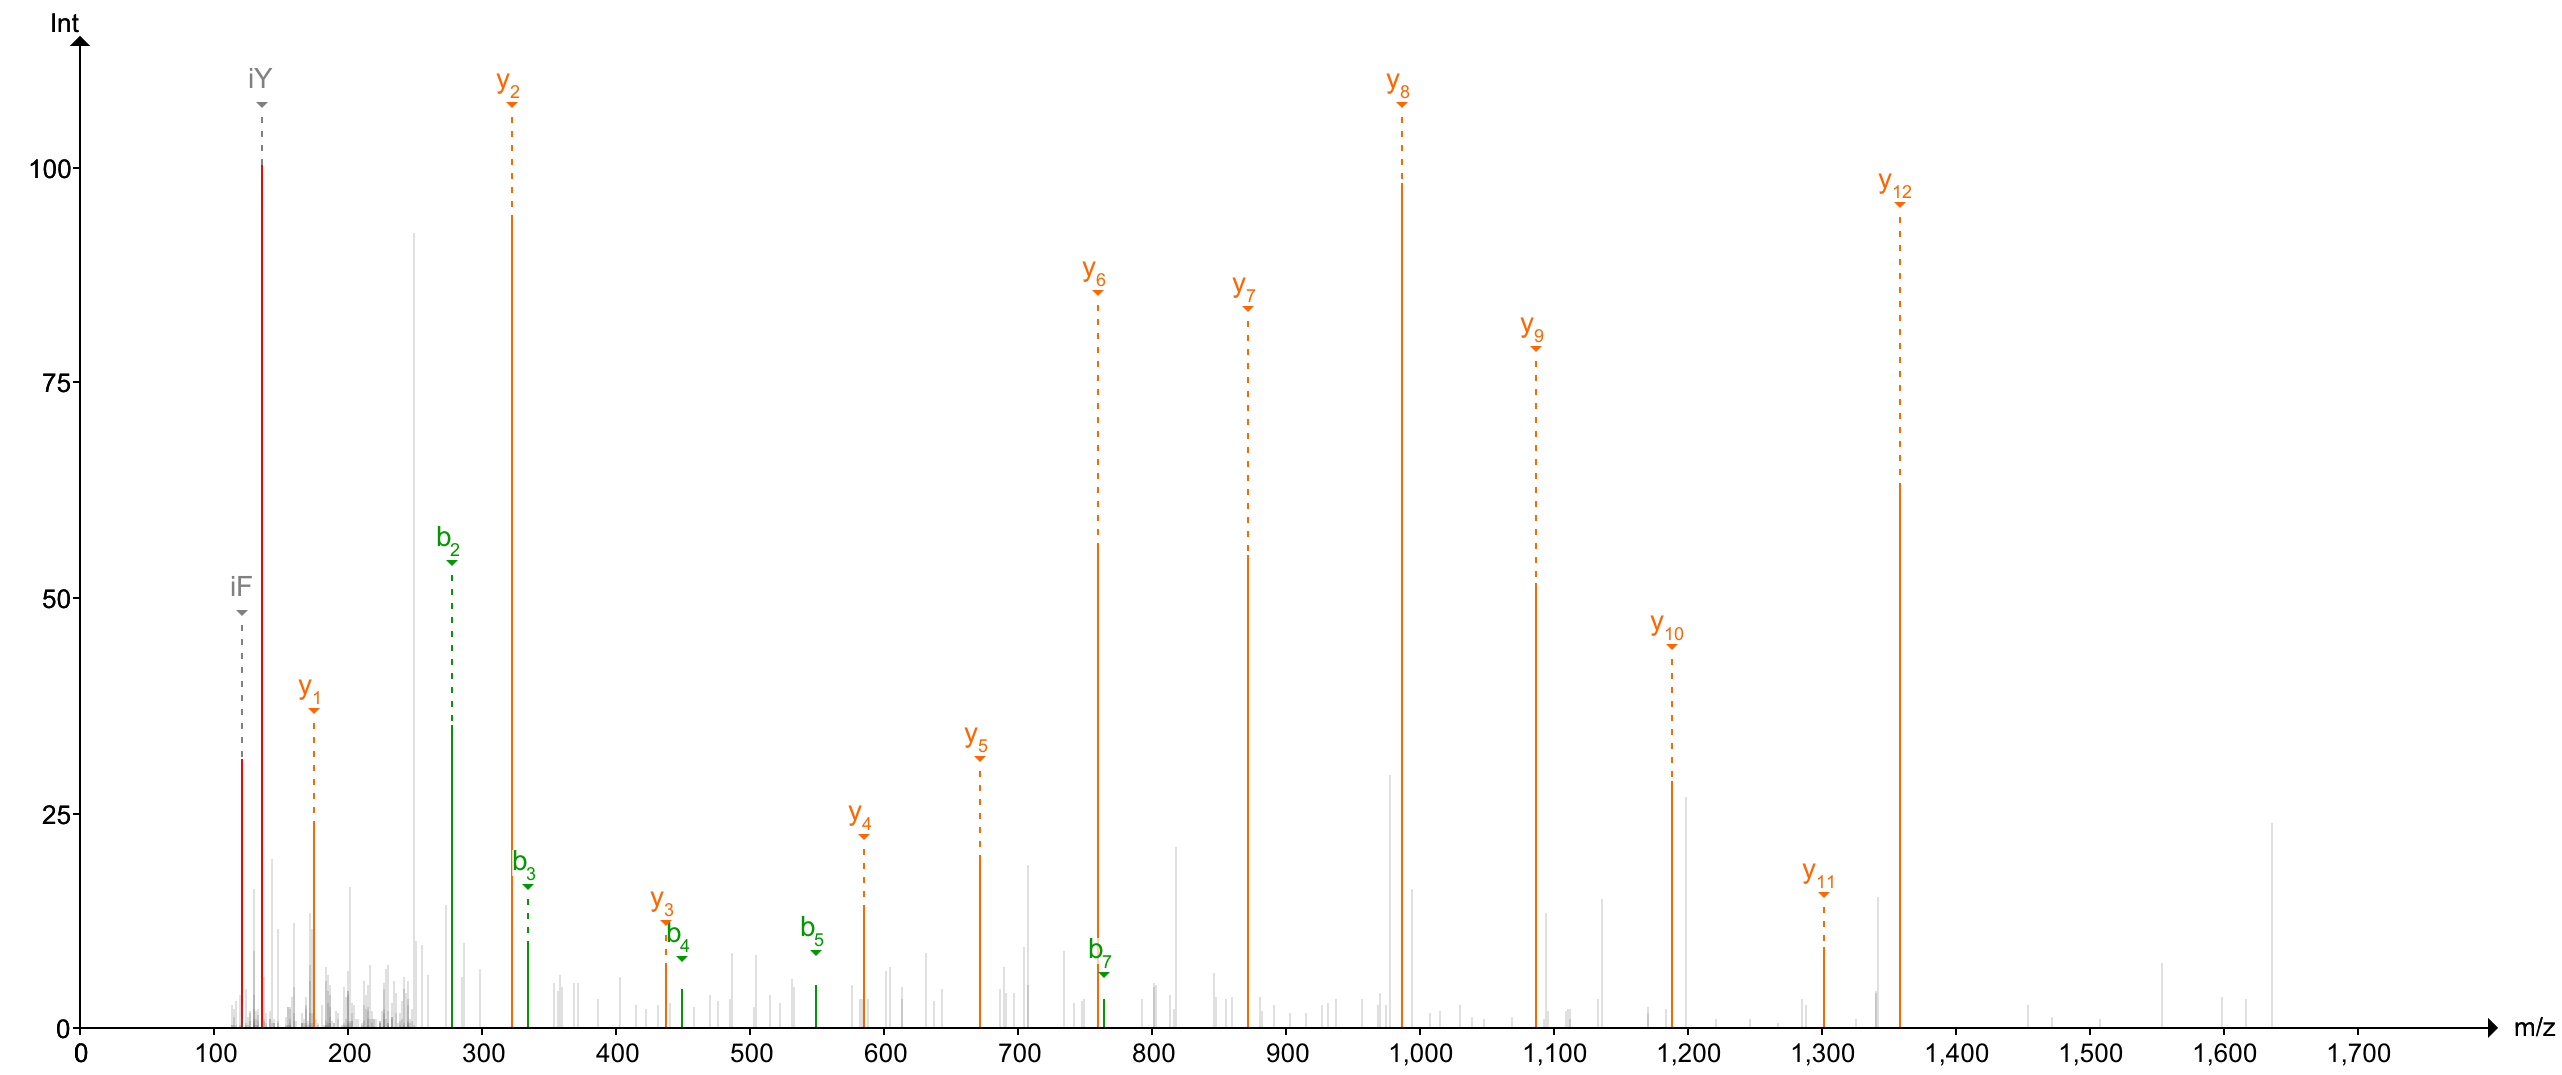

NH<sub>2</sub>-A A<sub>1</sub>L<sub>1</sub>E<sub>1</sub>A<sub>1</sub>I<sub>1</sub>D<sub>1</sub>E<sub>1</sub>L<sub>1</sub>D<sub>1</sub>L<sub>1</sub>F<sub>1</sub>G<sub>1</sub>A<sub>1</sub>H<sub>1</sub>G<sub>1</sub>G<sub>1</sub>R-COOH

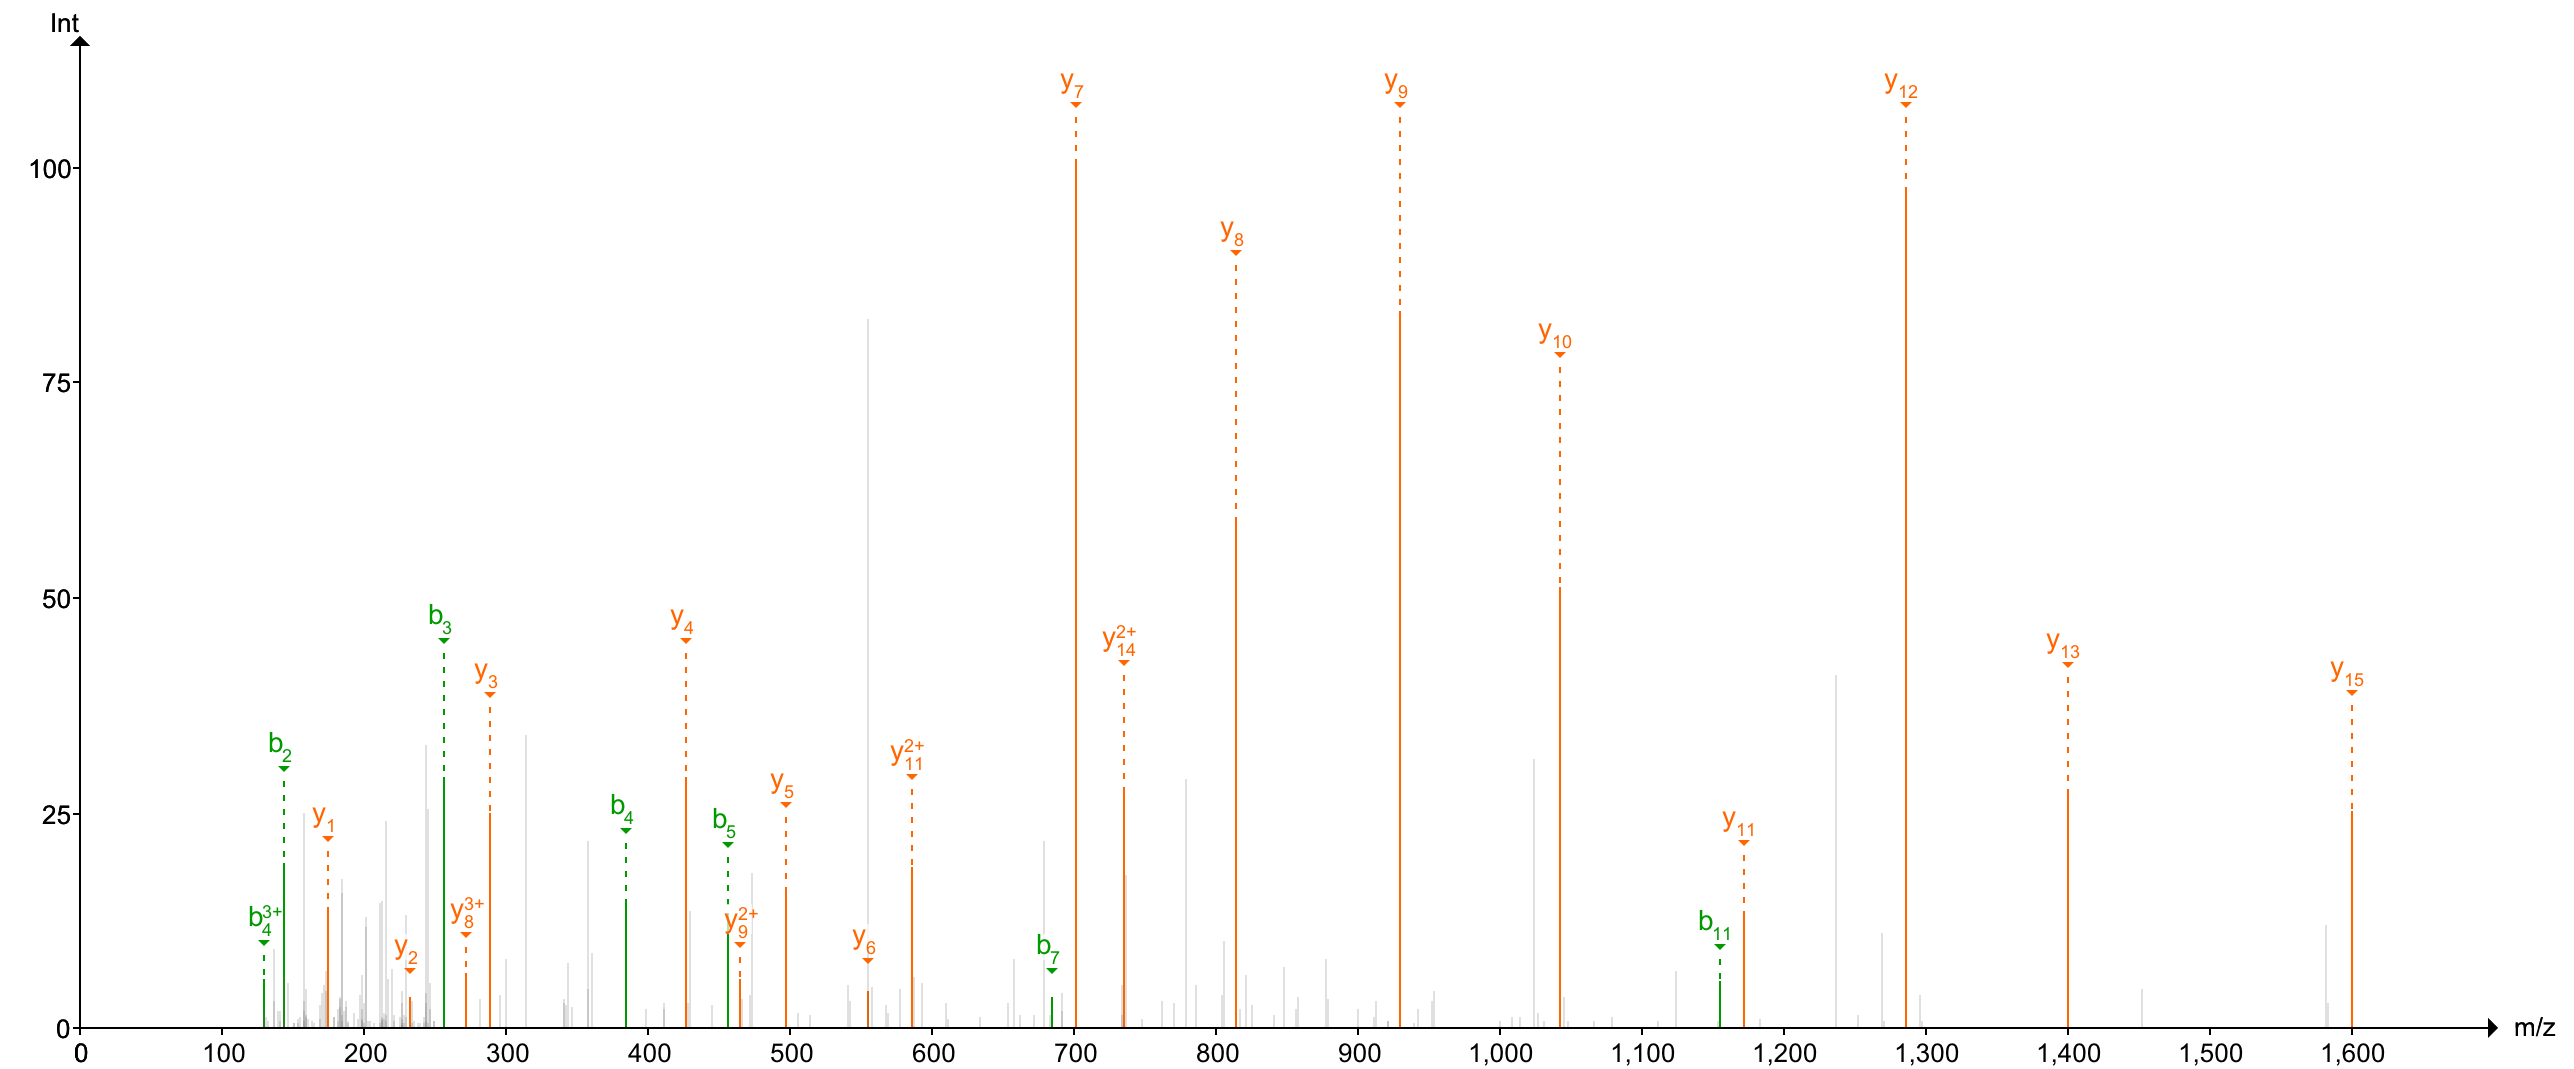

NH<sub>2</sub>-A L E P S F L P V A E L H G L R-COOH

b<sub>2</sub> b<sub>3</sub>

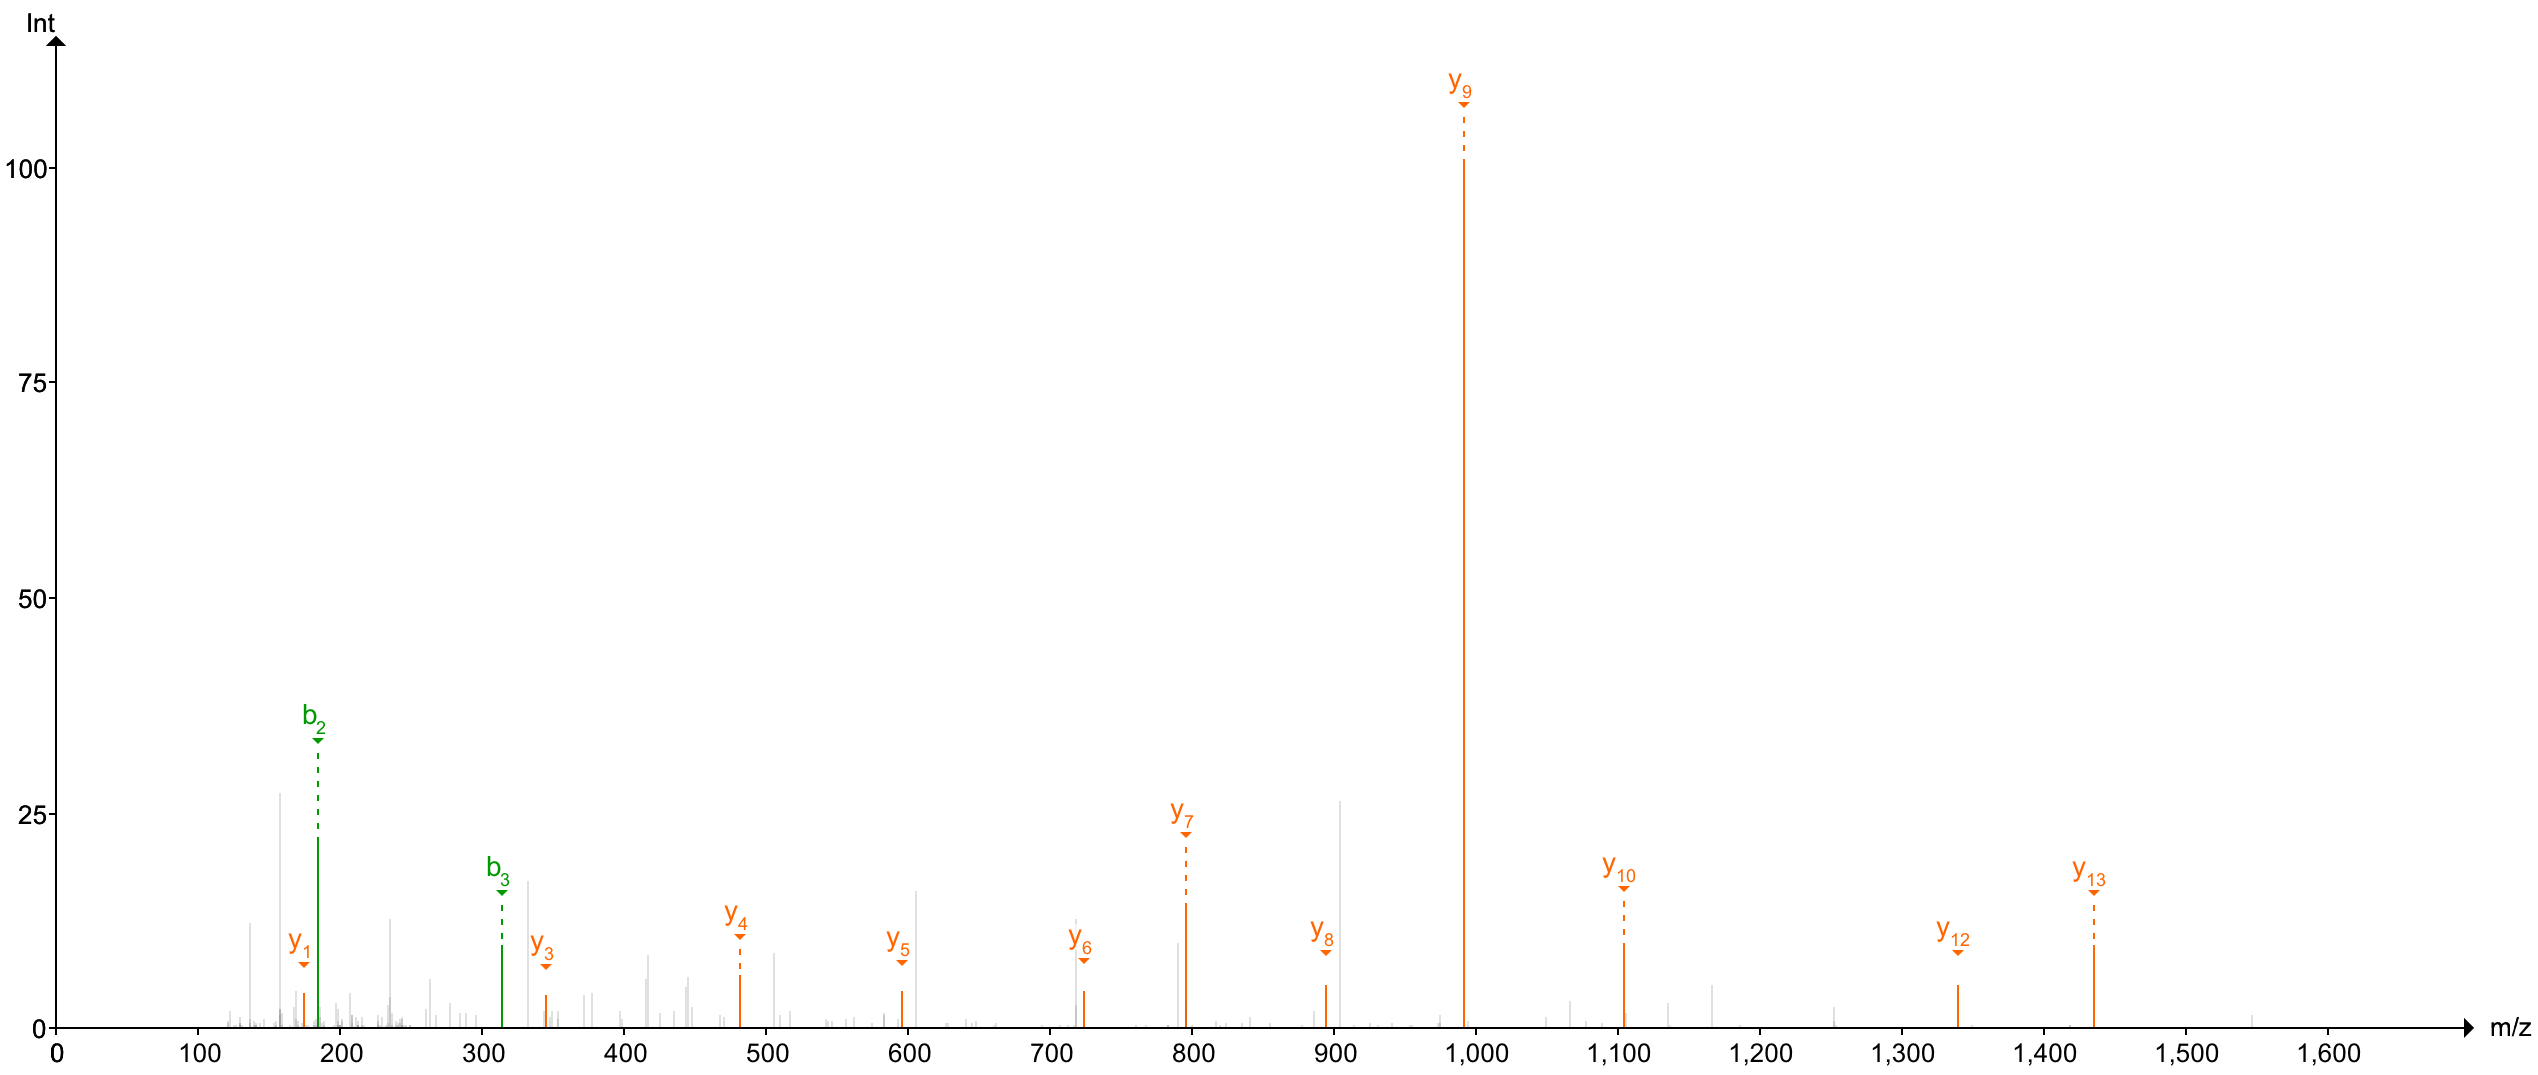

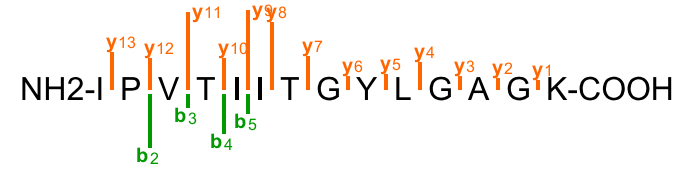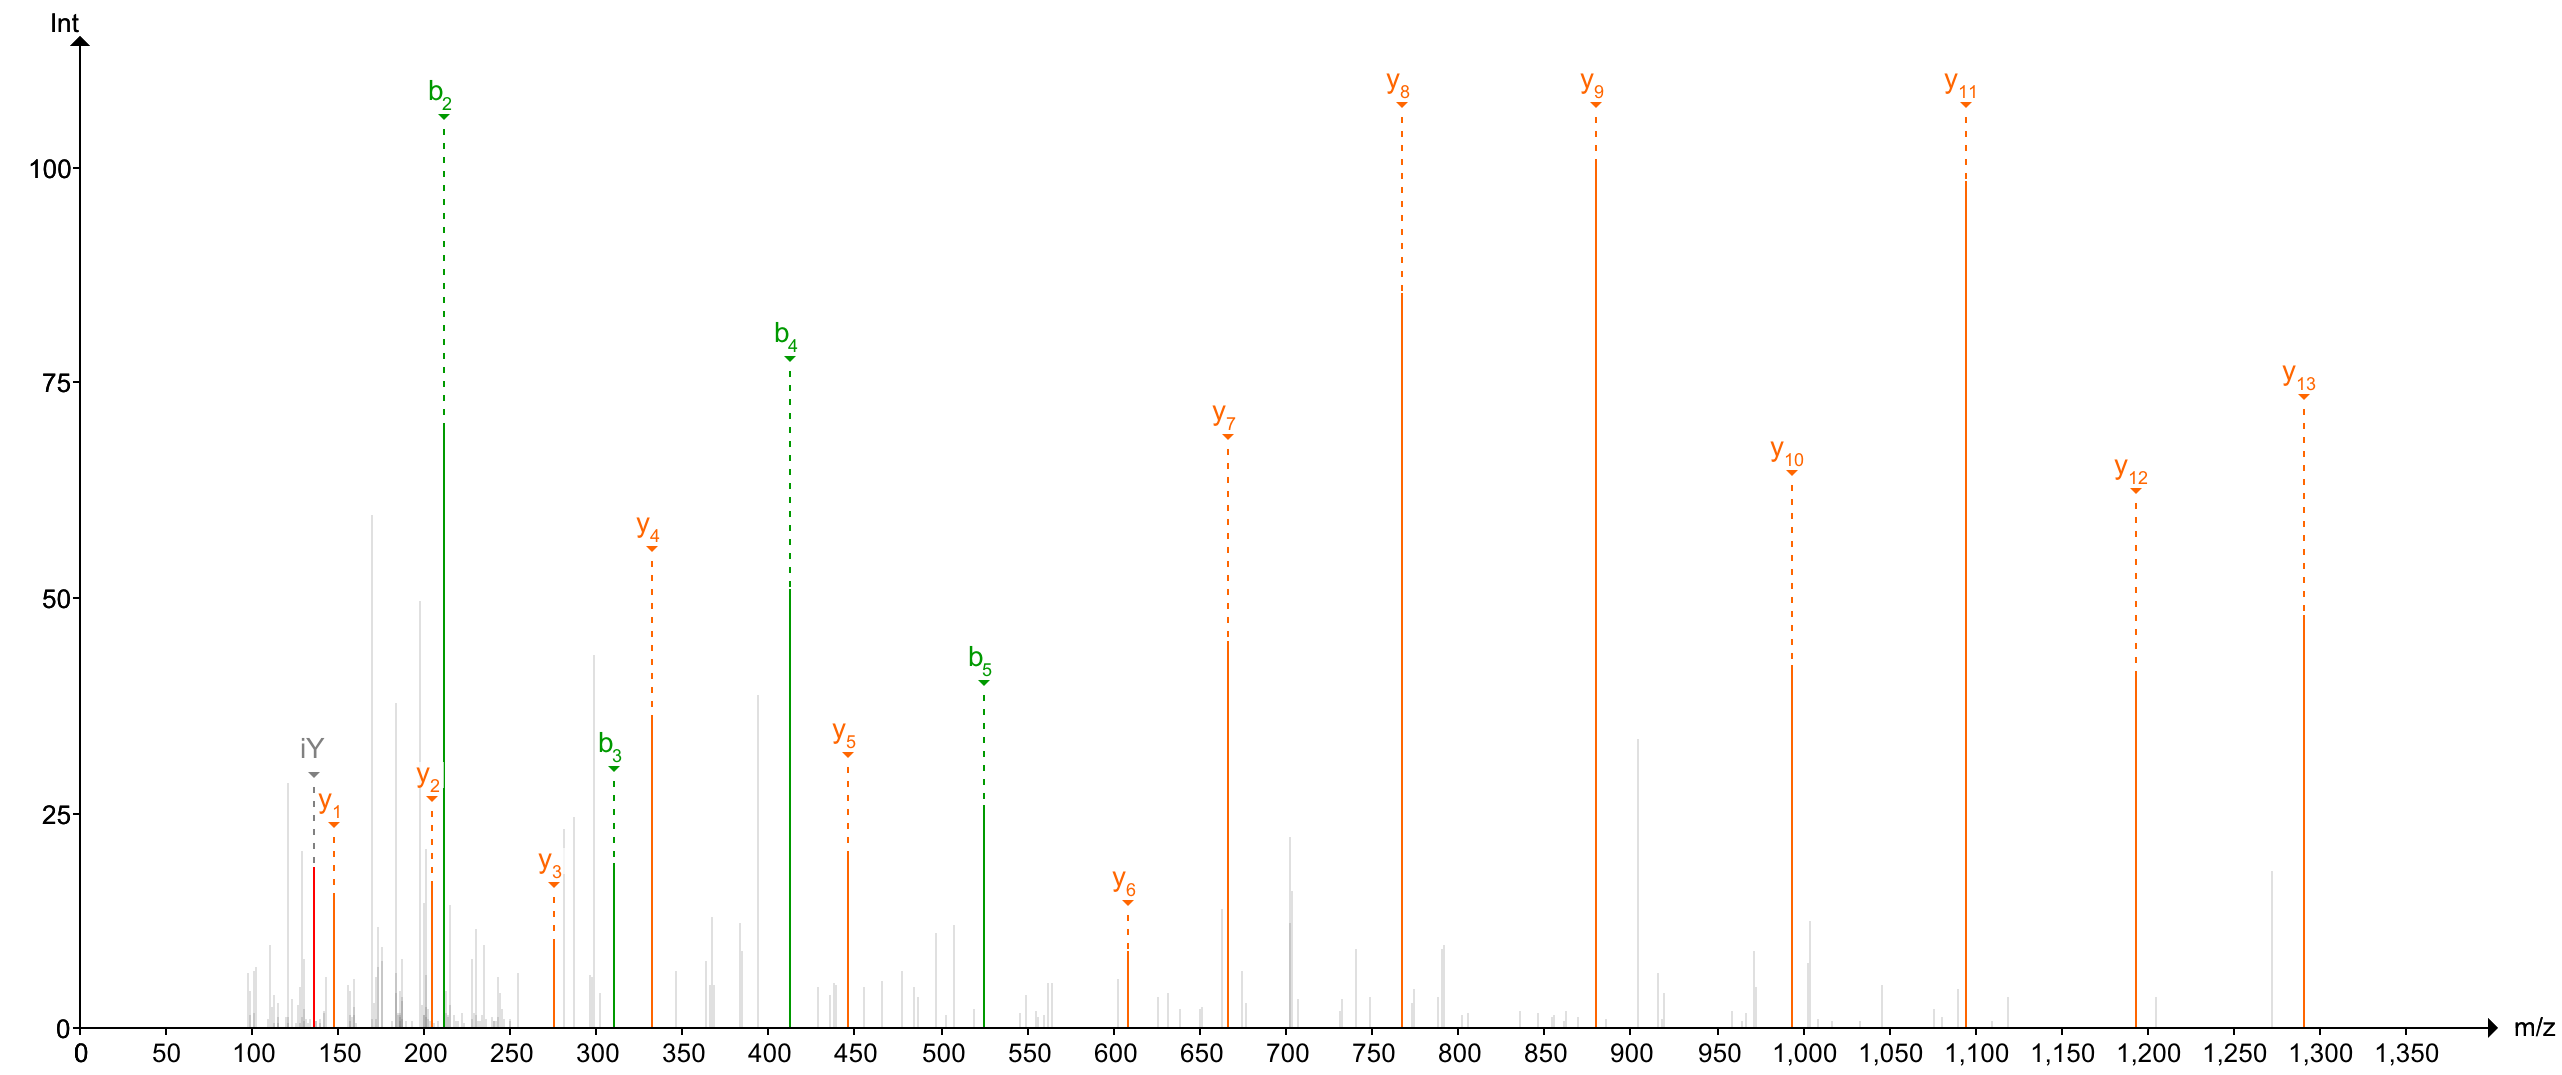

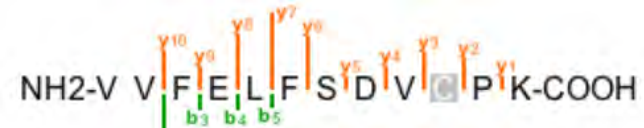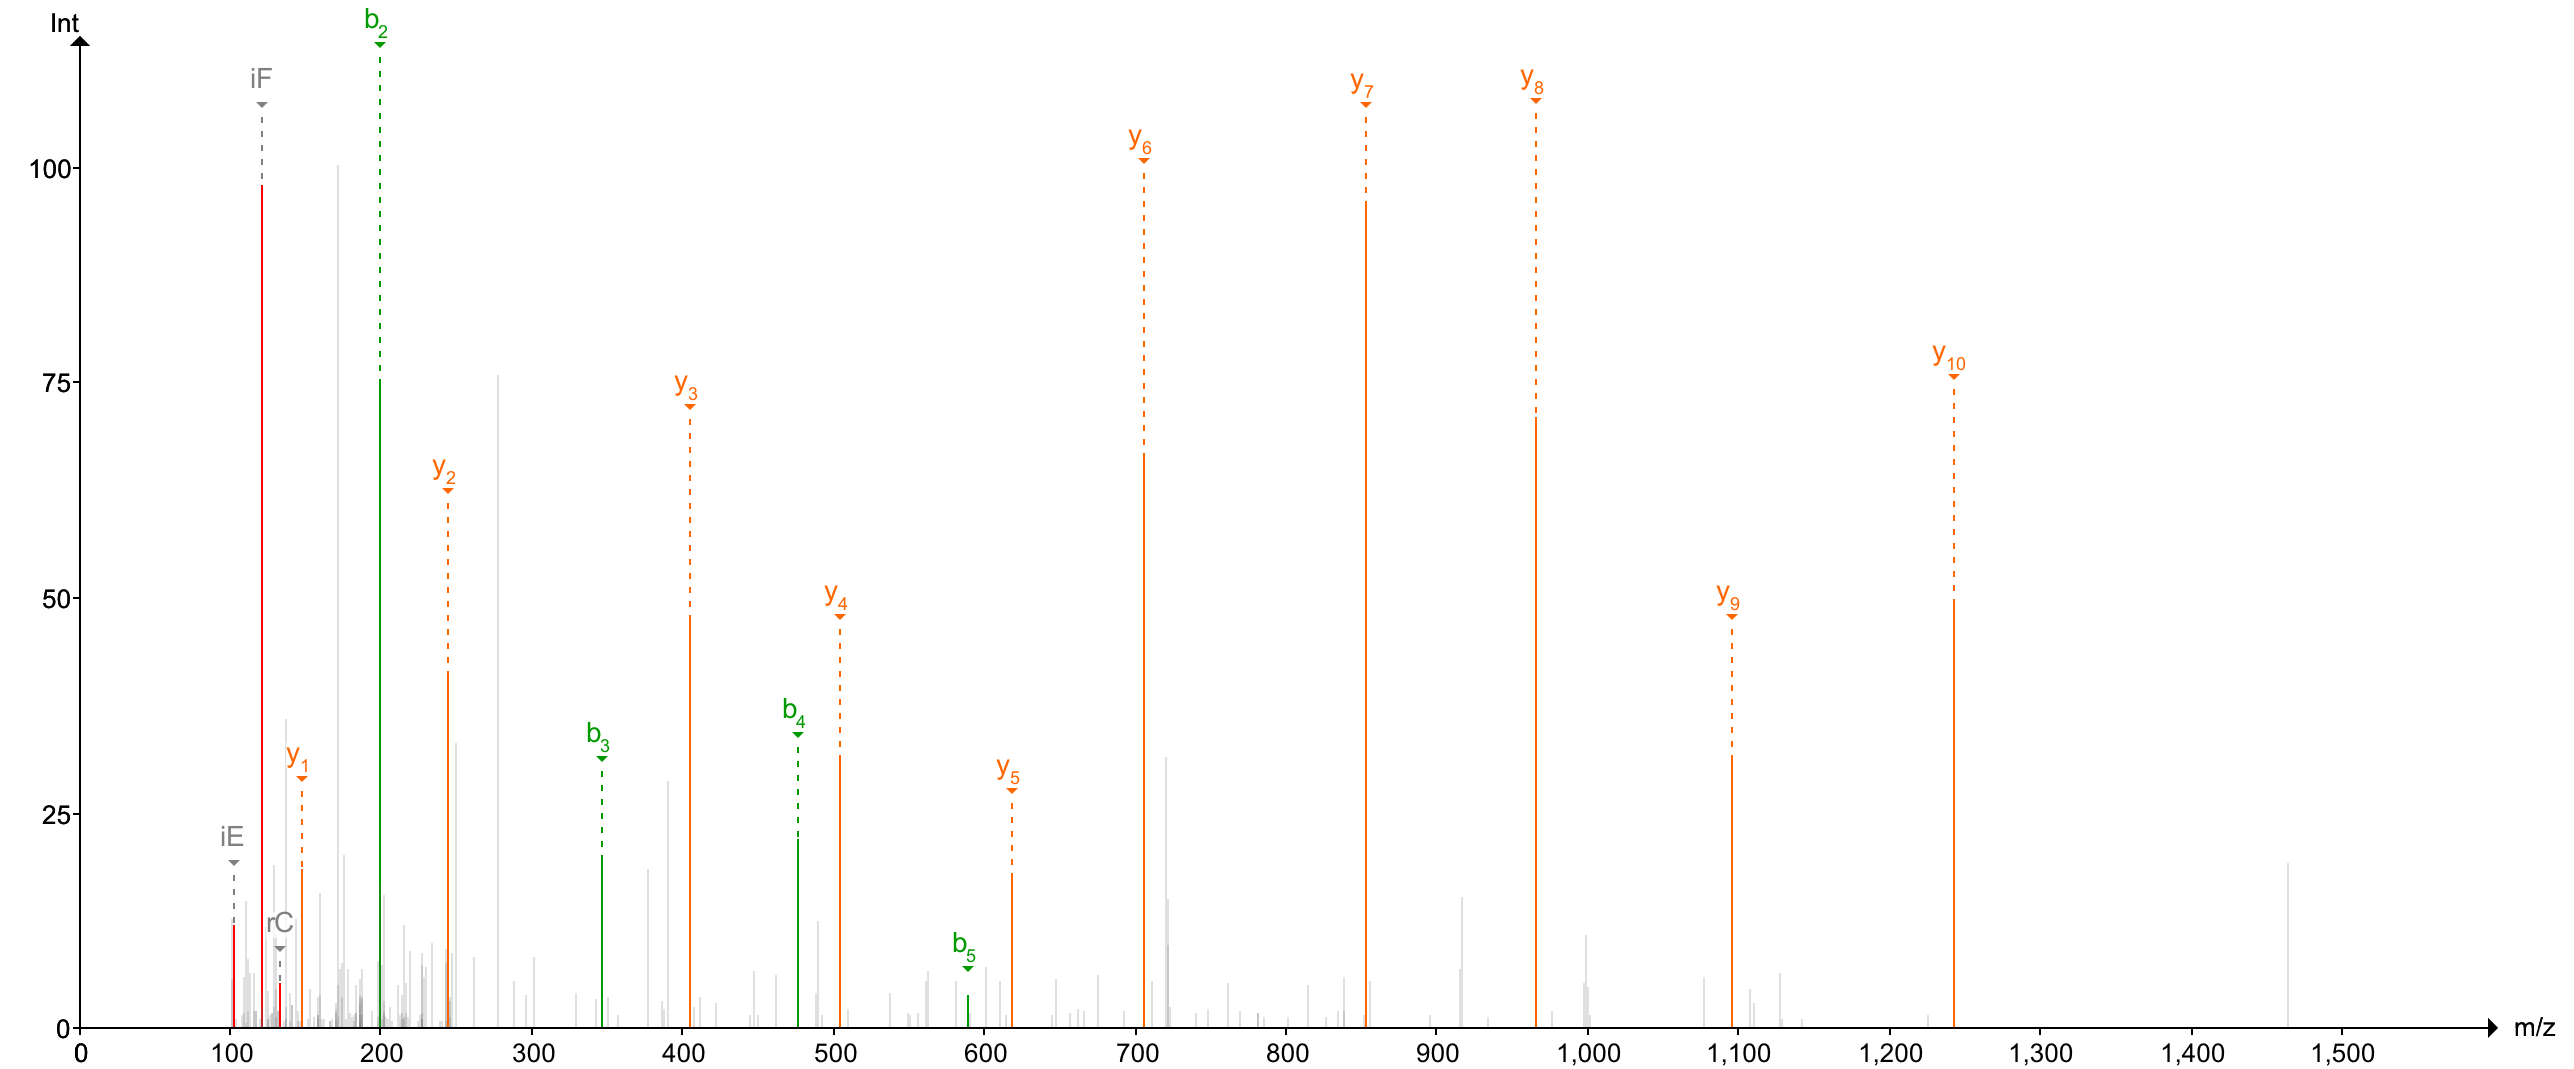



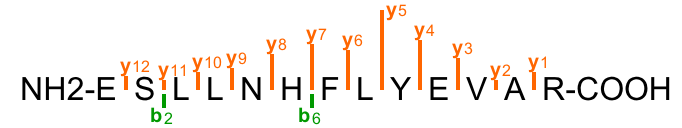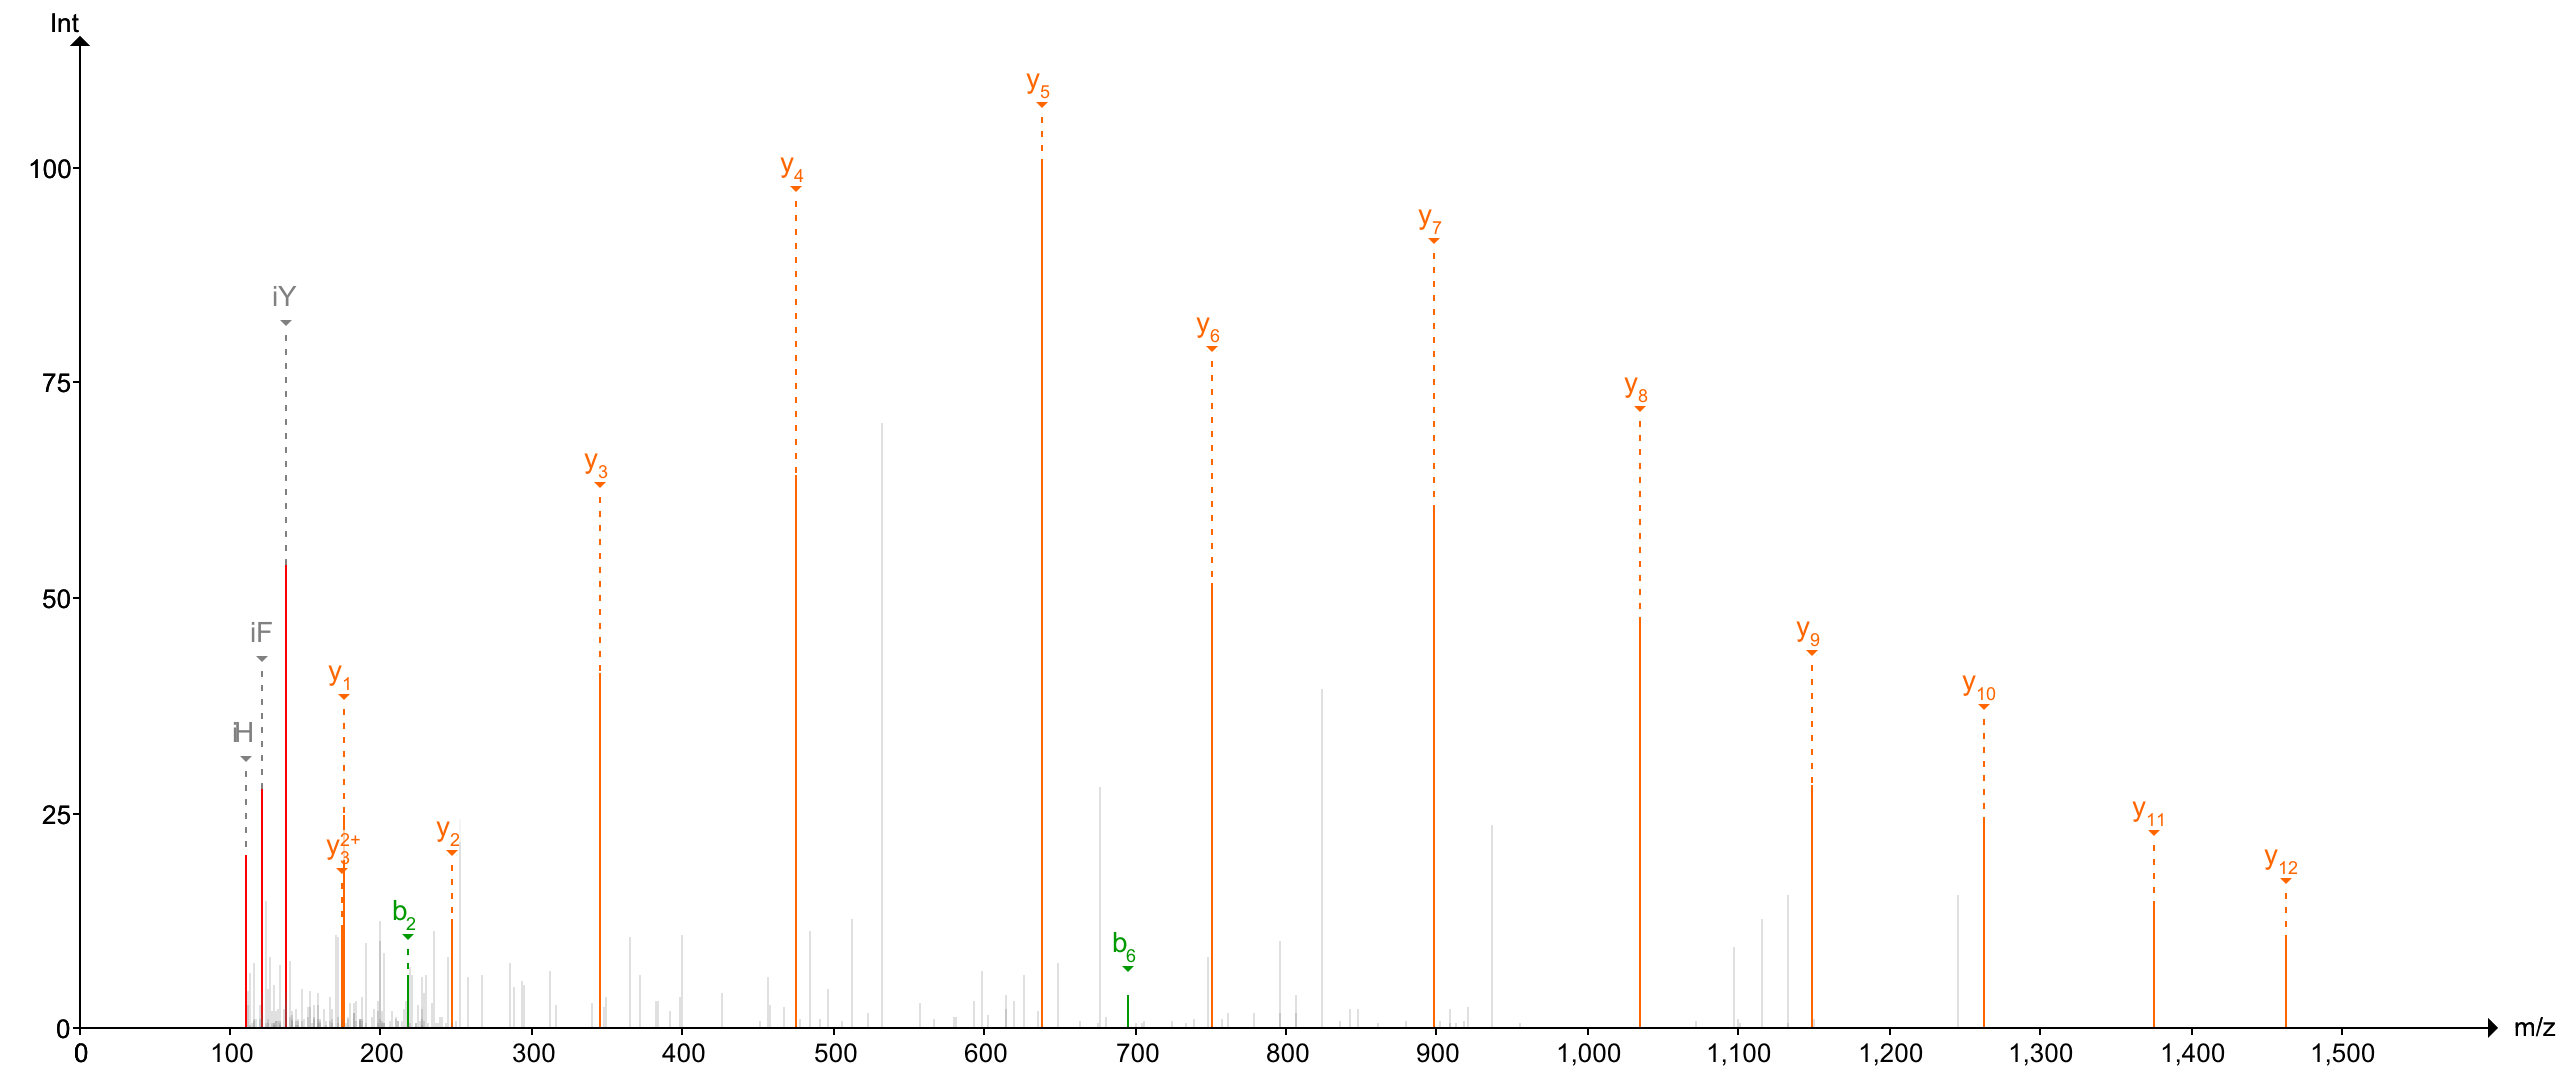



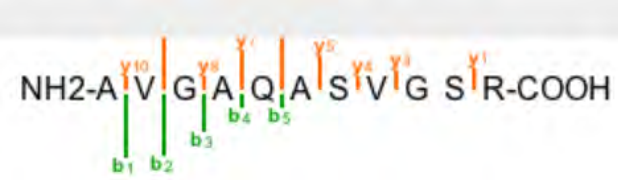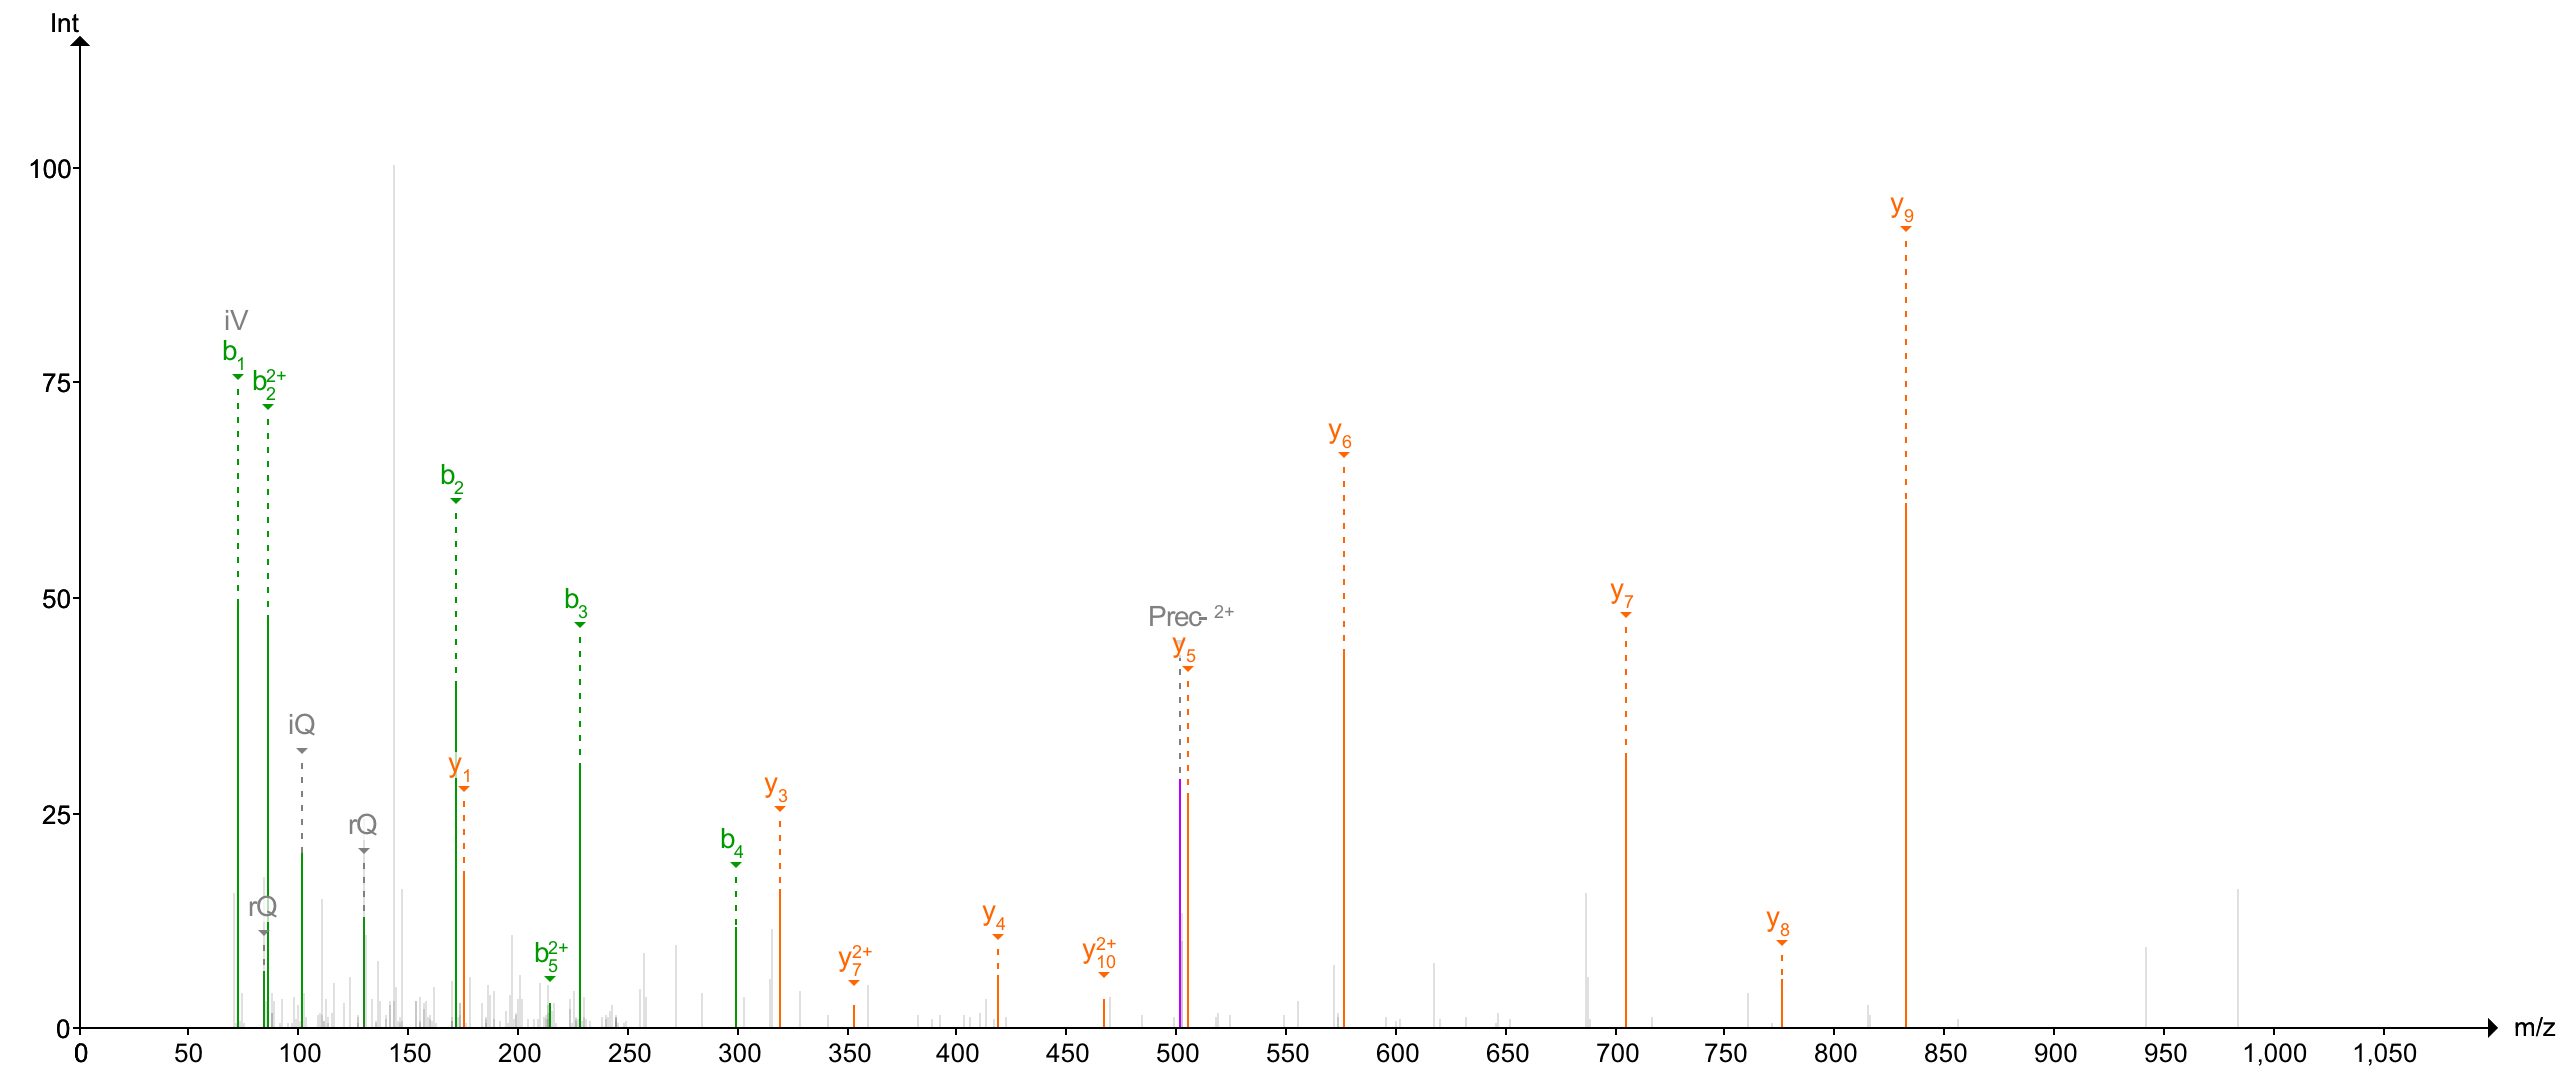

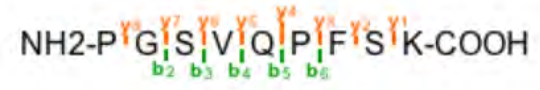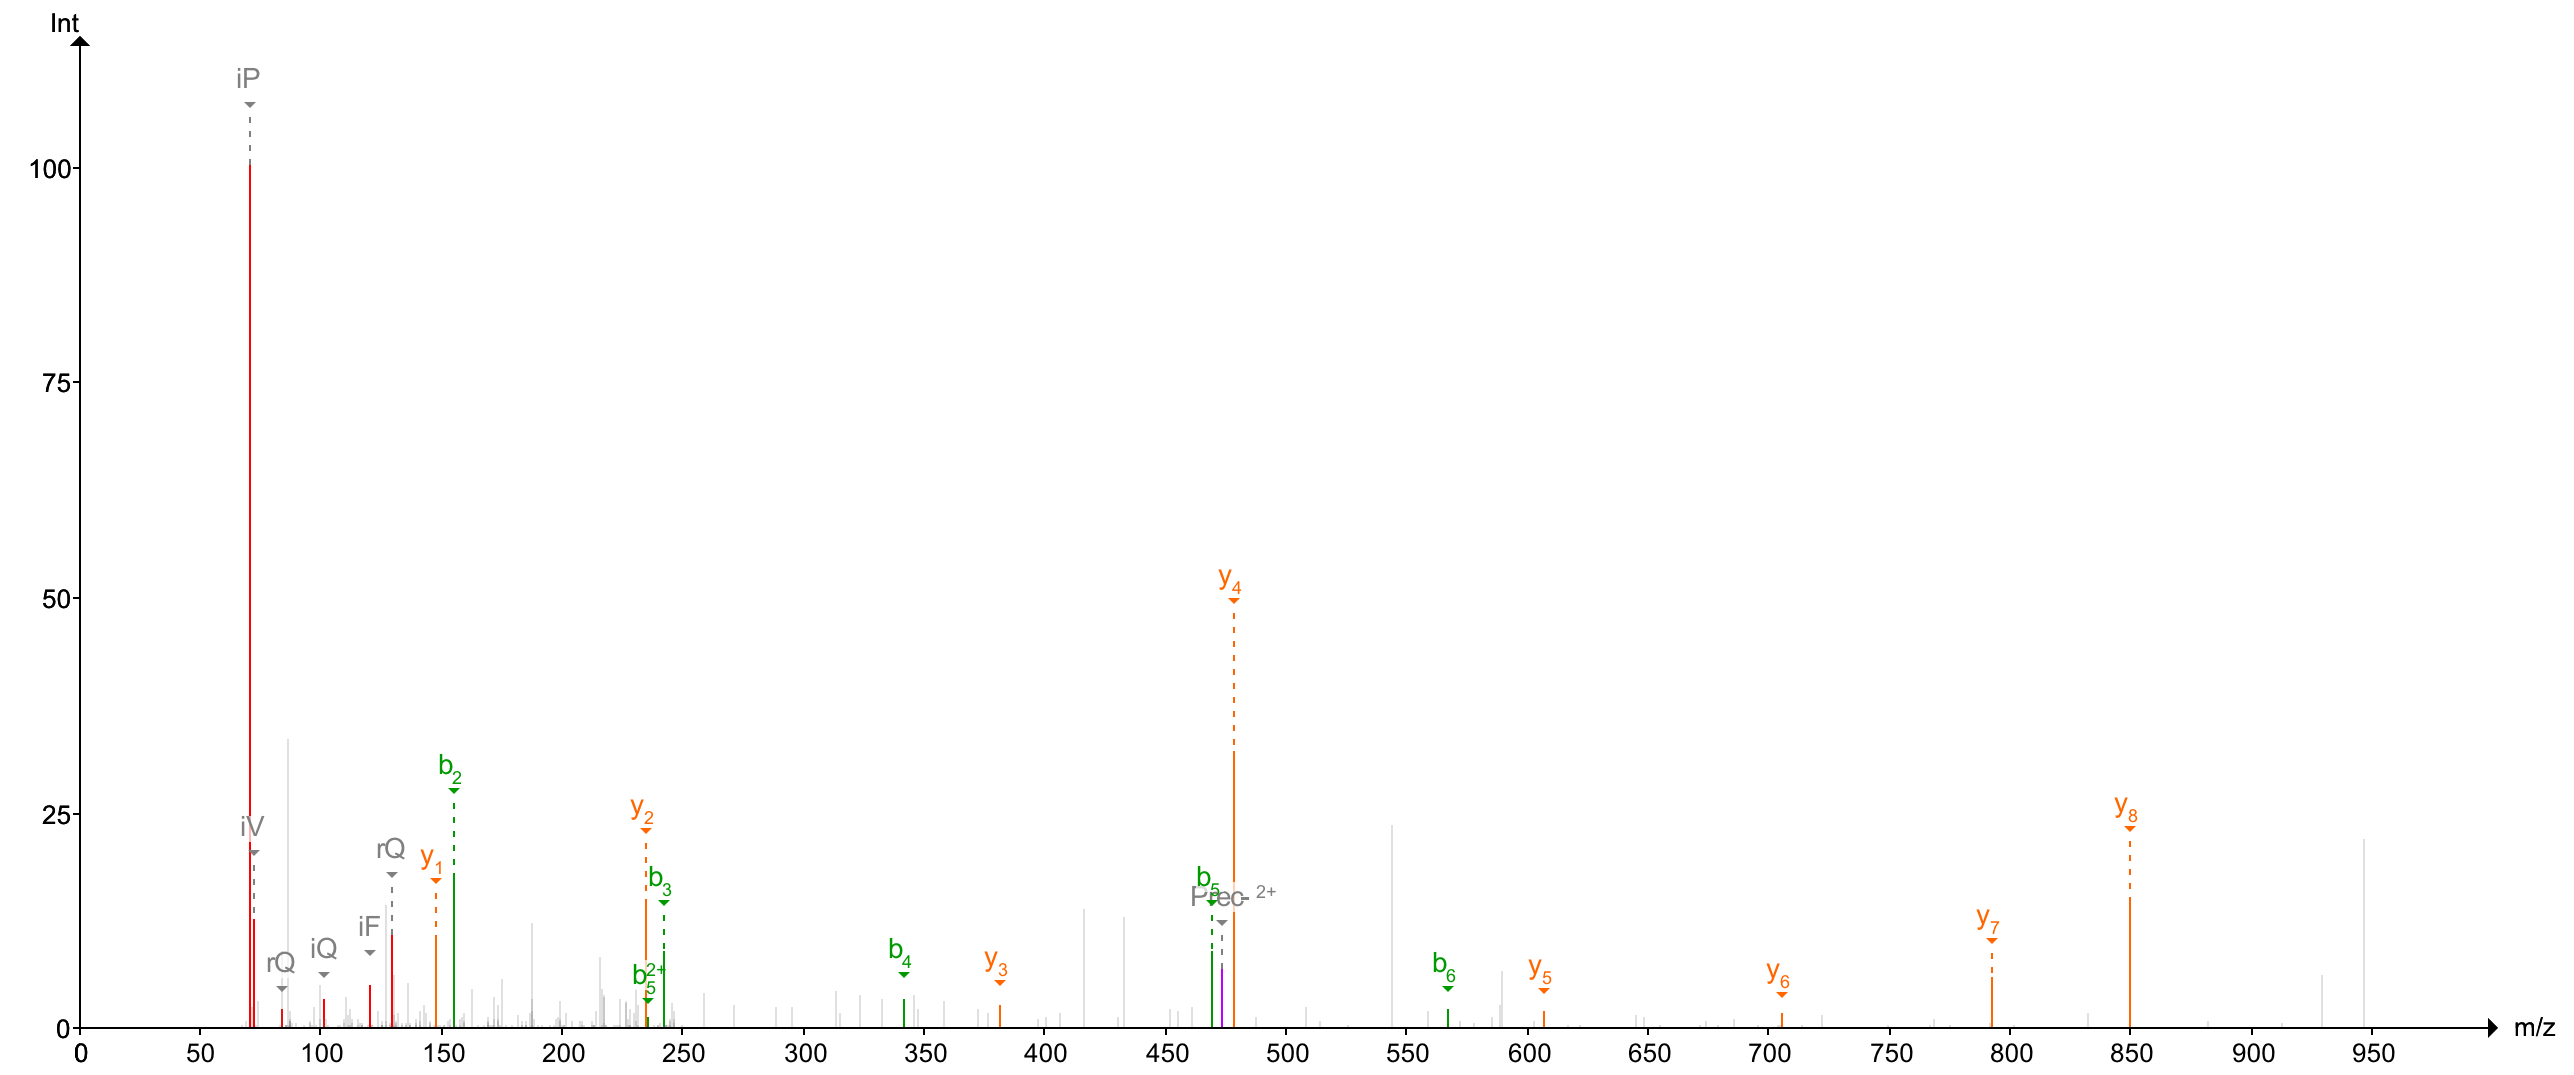

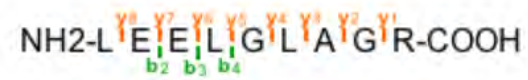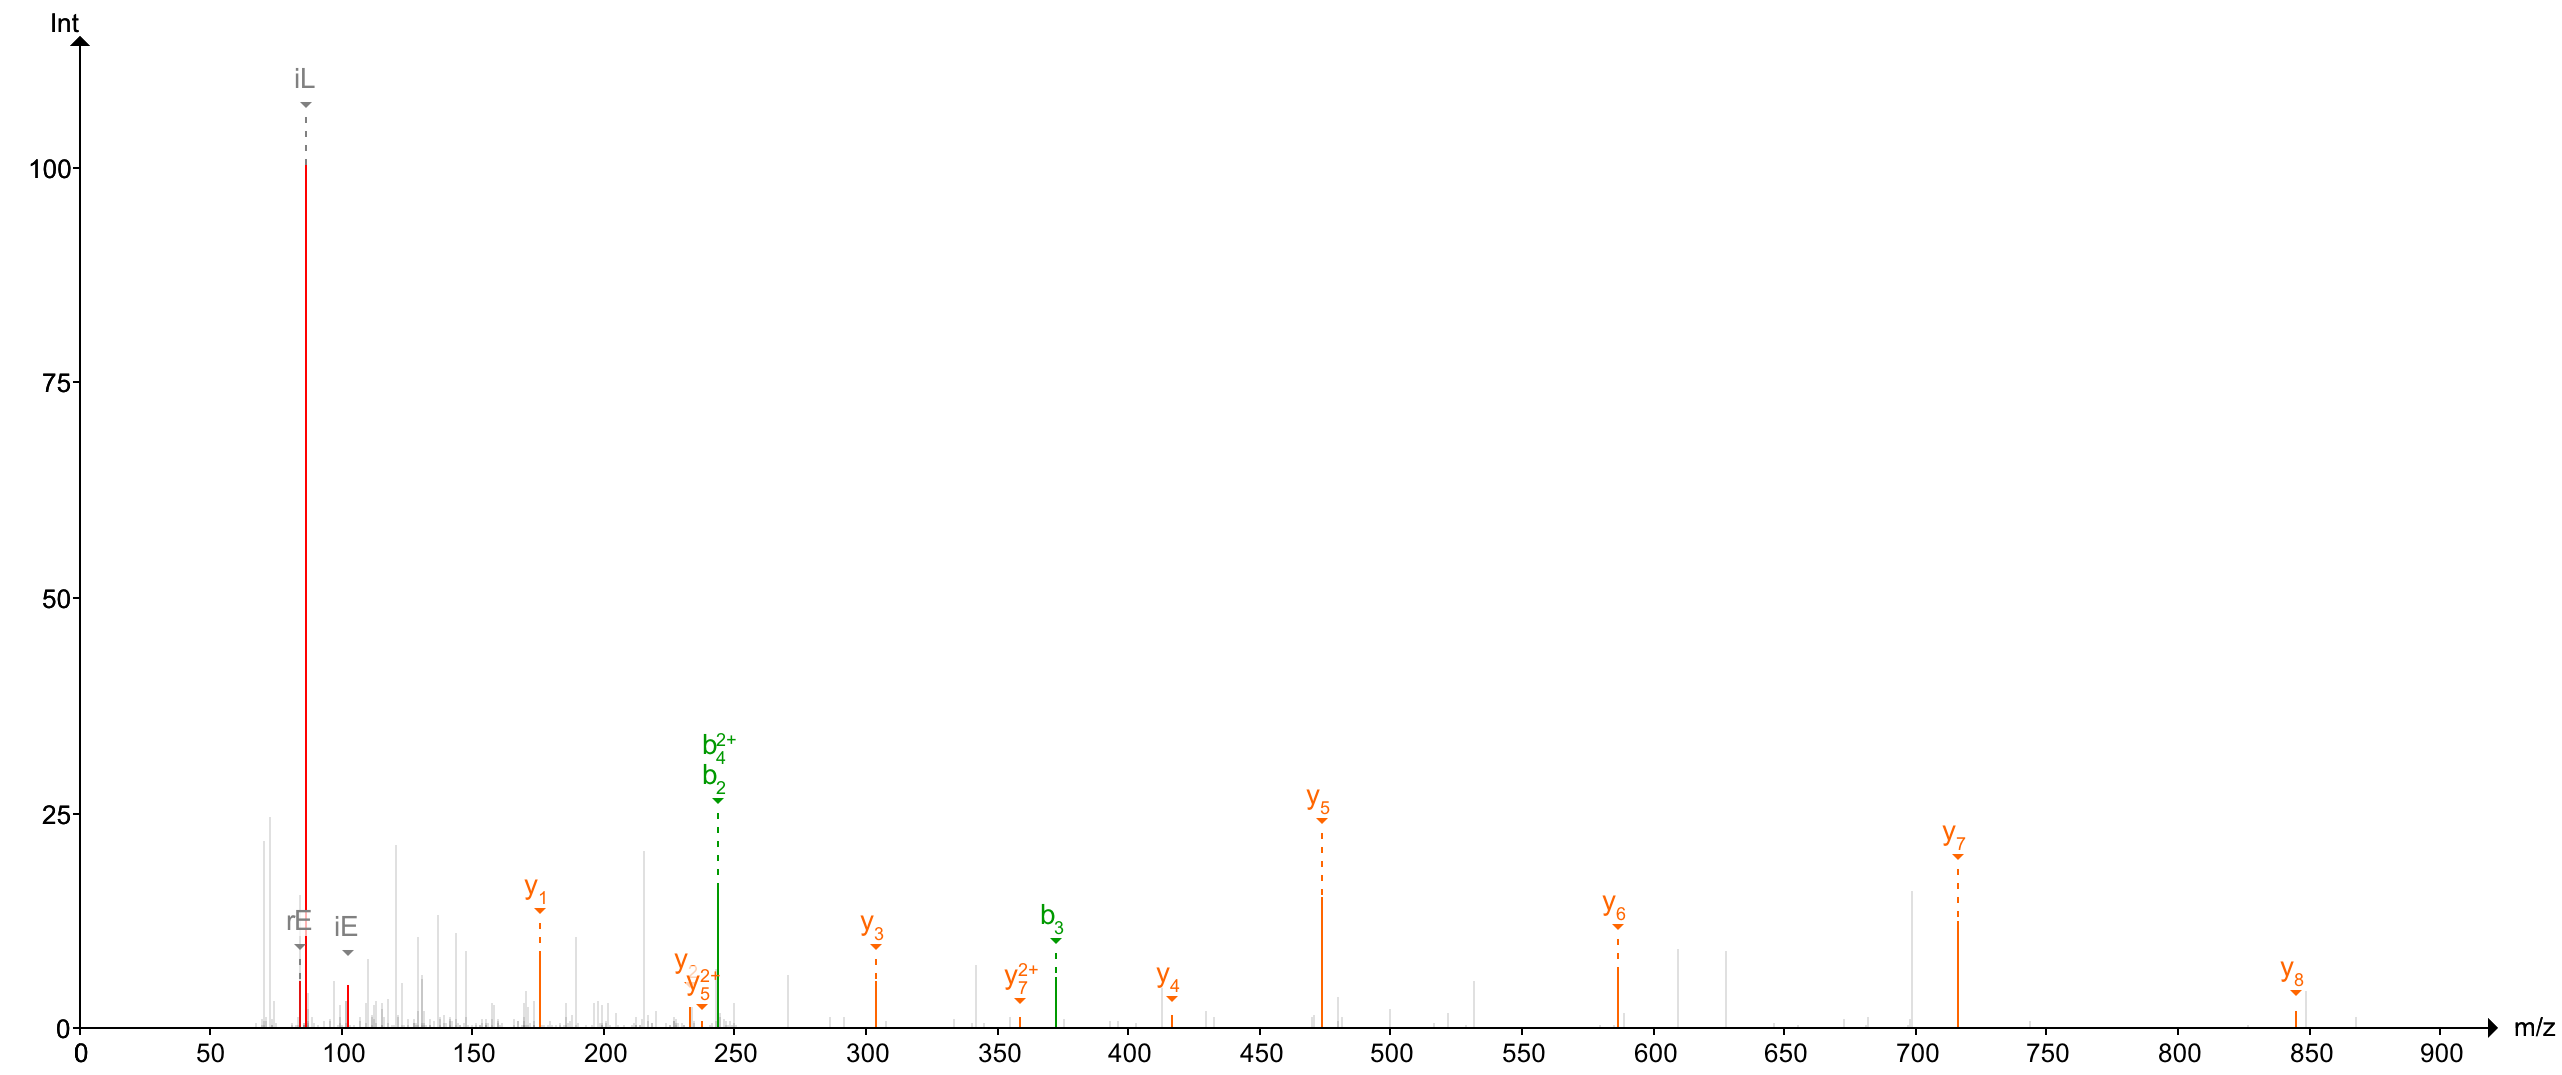

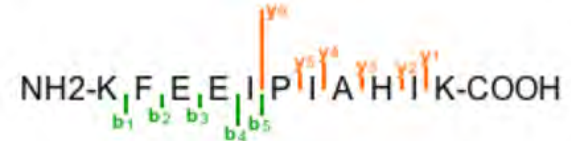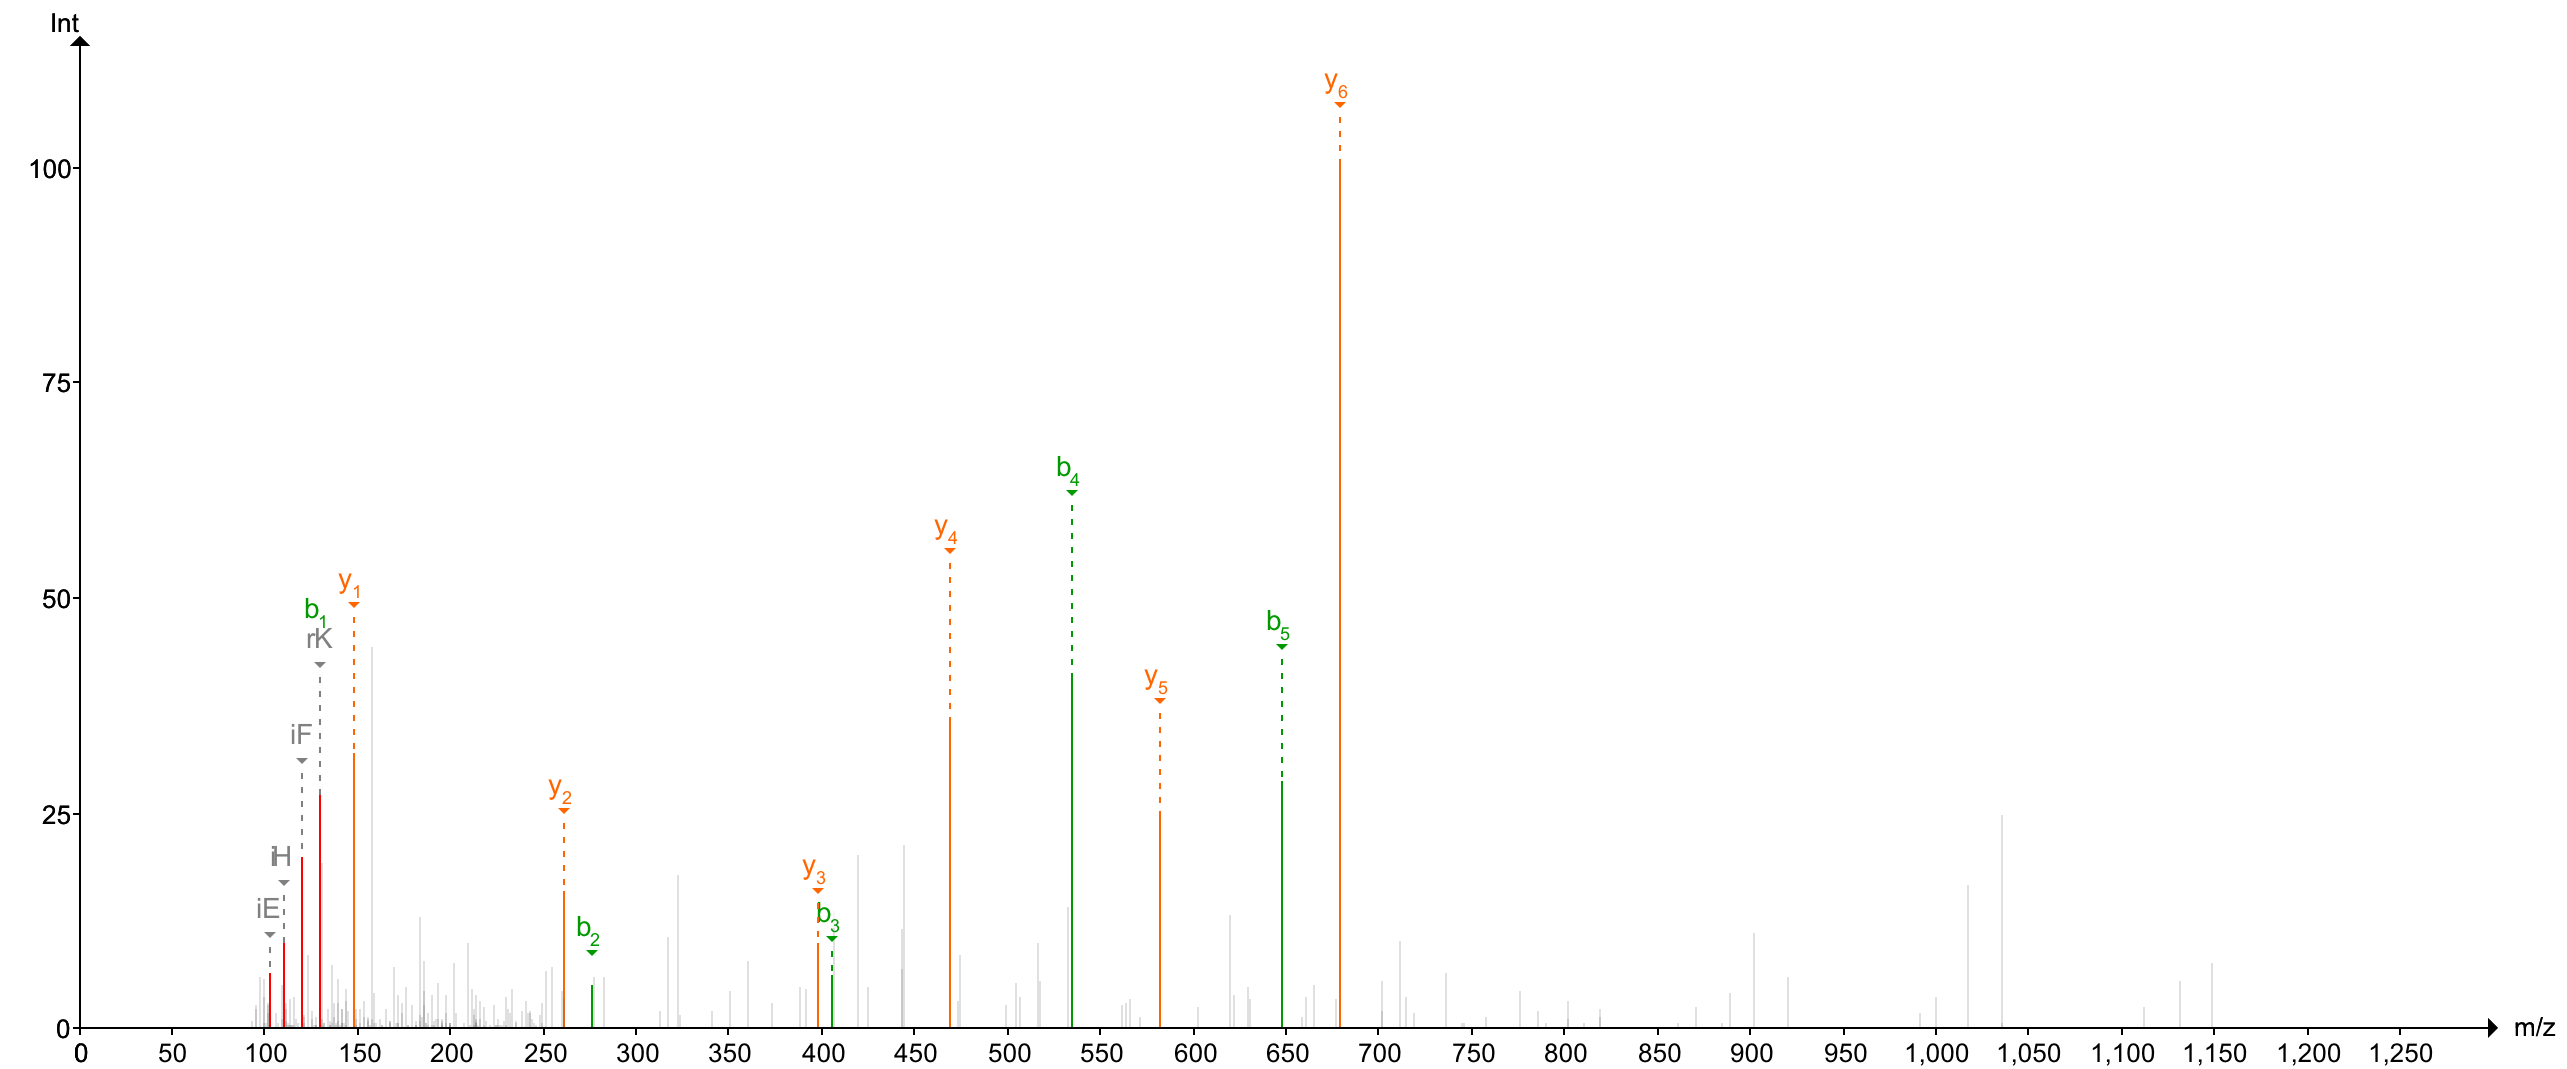

NH<sub>2</sub>-V L A A L P A A E L V Q A C R-COOH

b<sub>2</sub> b<sub>3</sub> b<sub>4</sub>

y<sub>10</sub>

y<sub>11</sub>

y<sub>7</sub>

y<sub>8</sub>

y<sub>9</sub>

y<sub>10</sub>

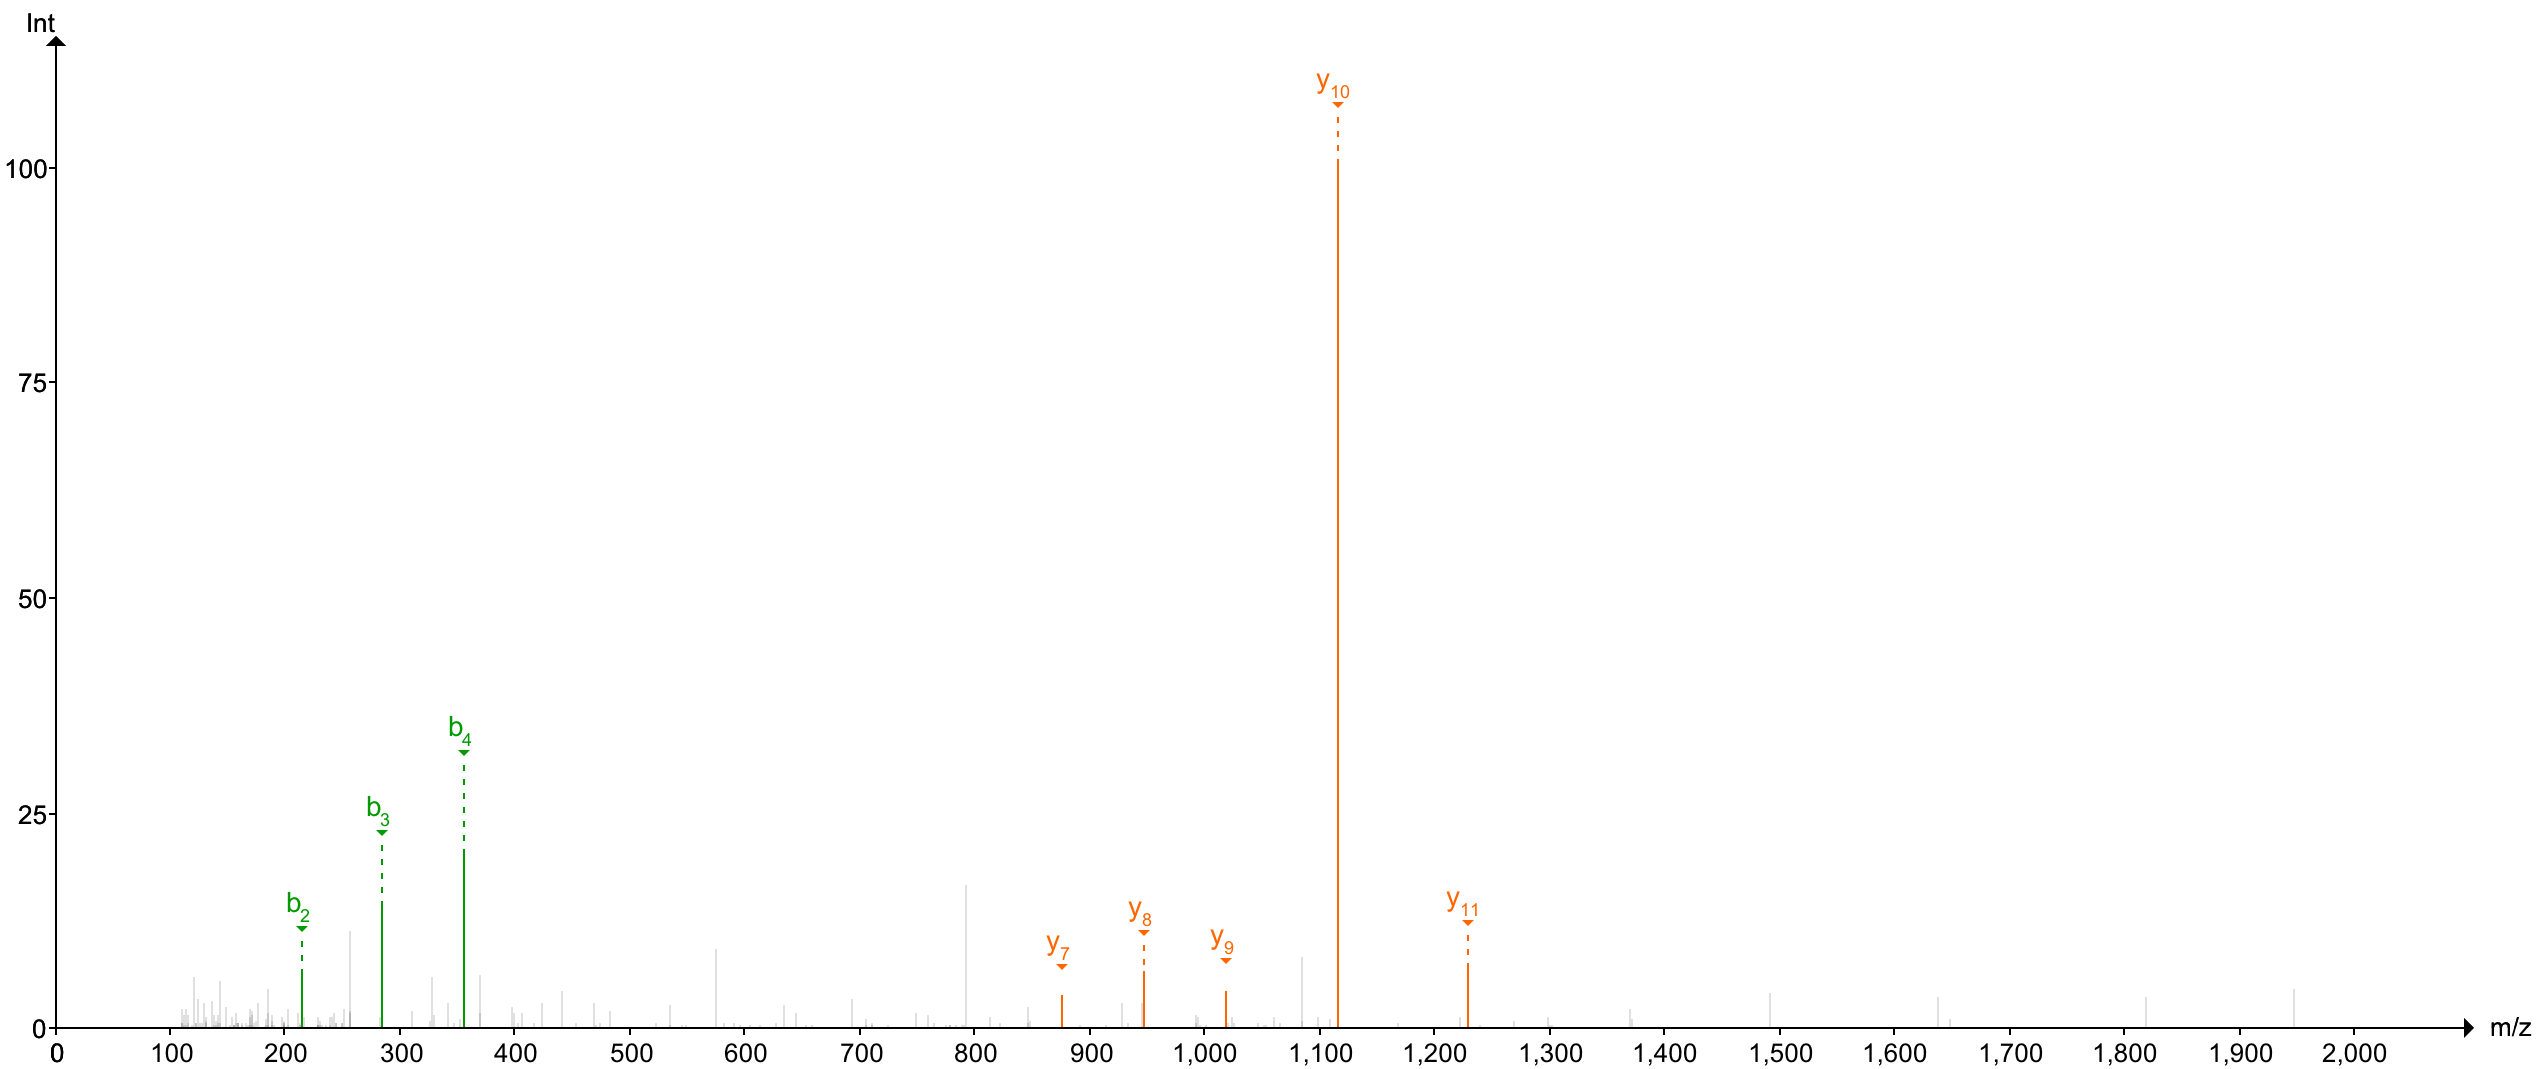

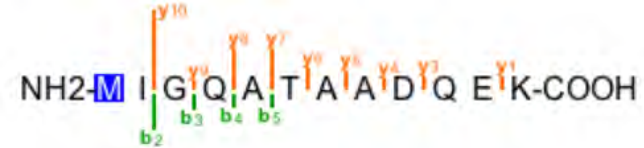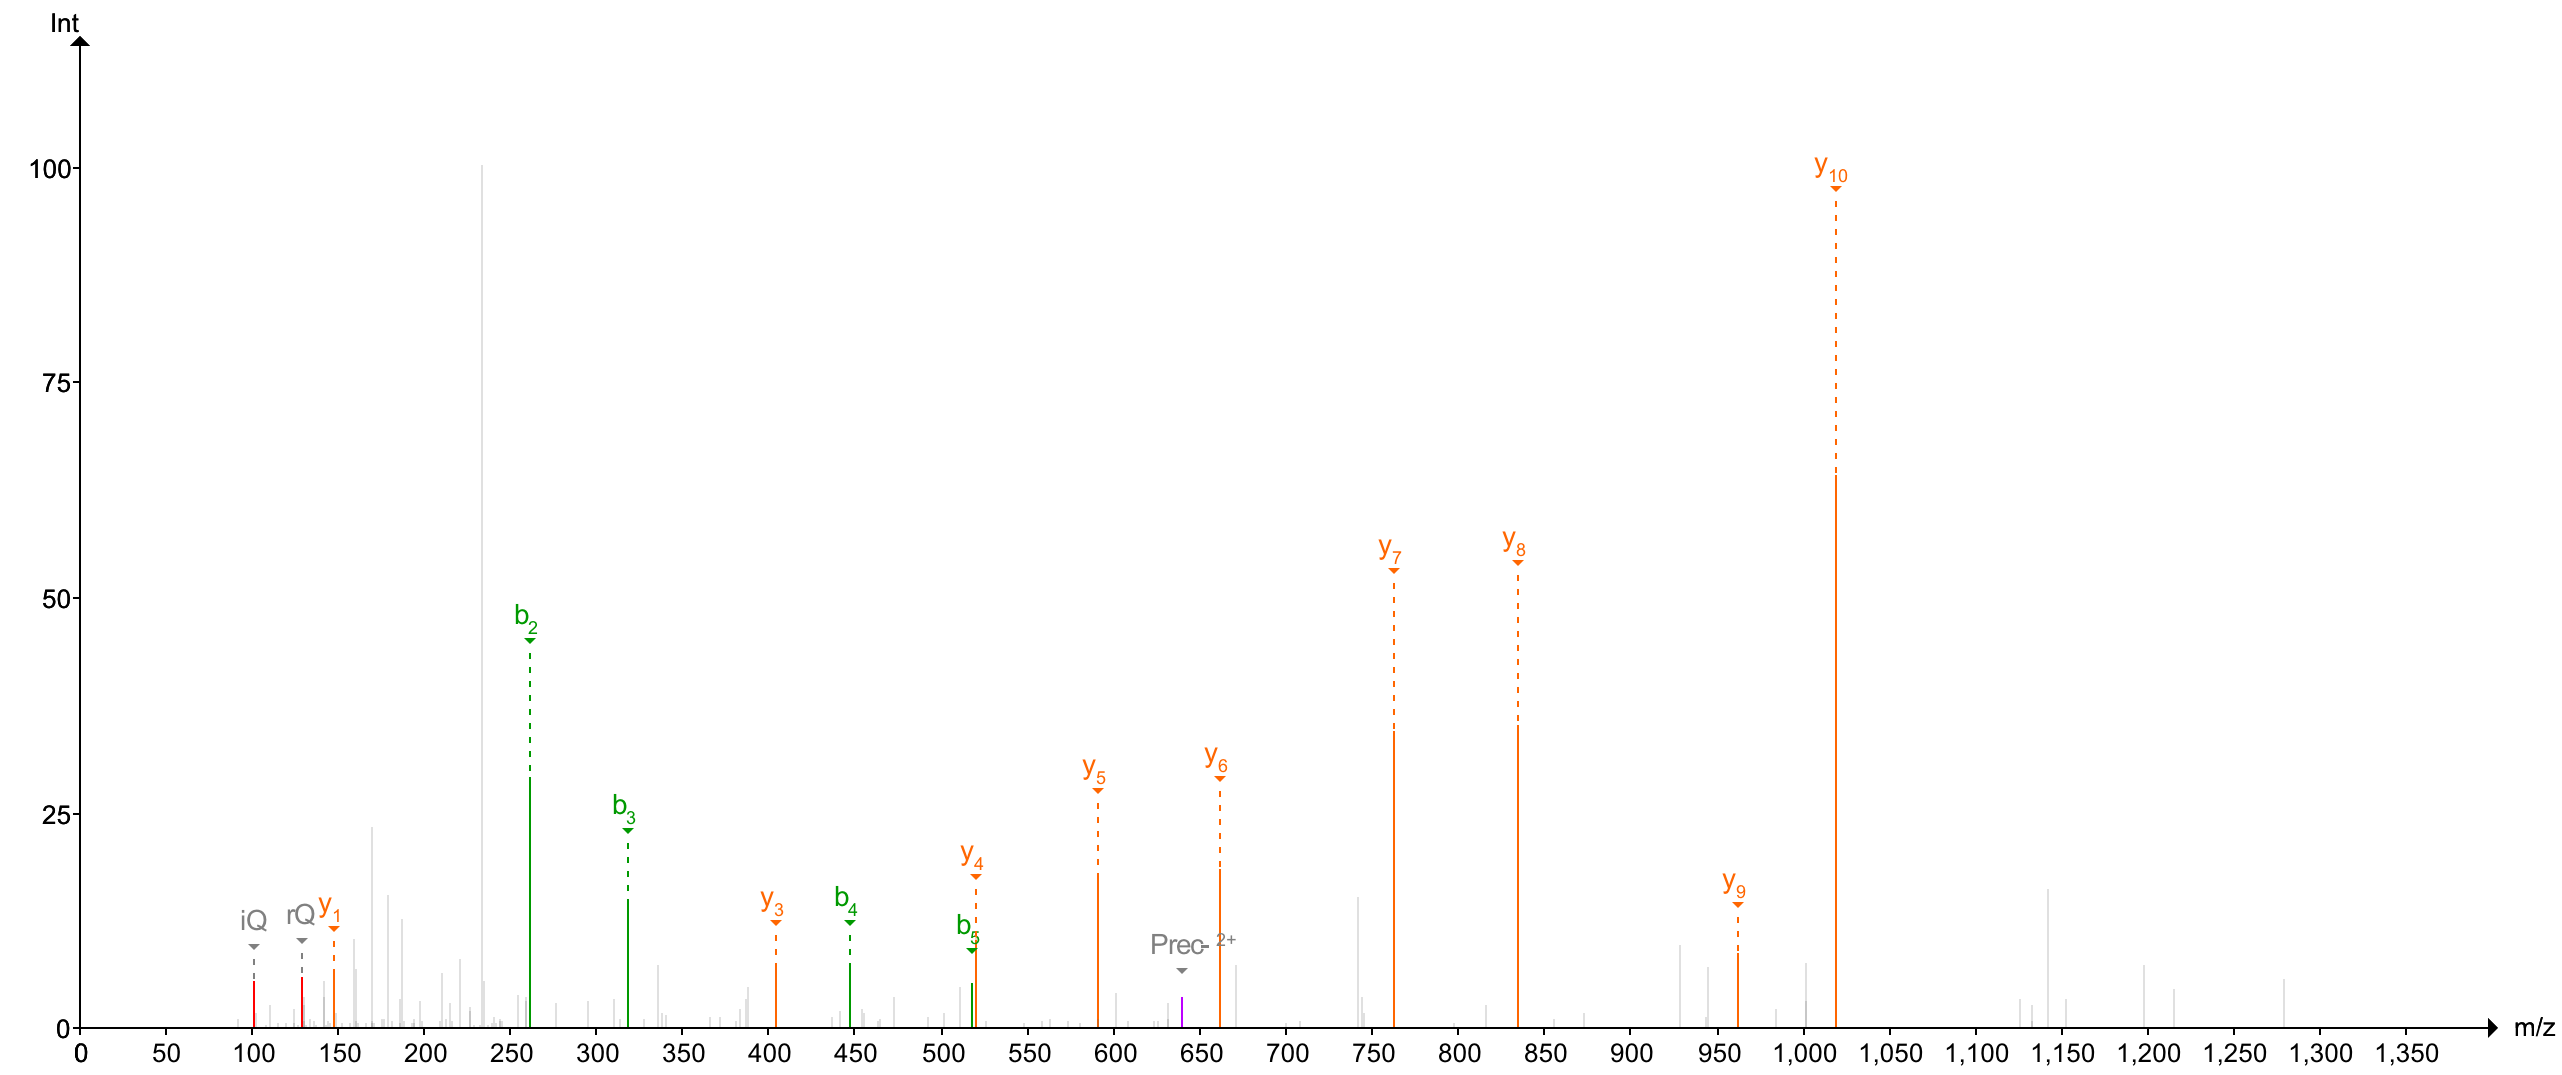



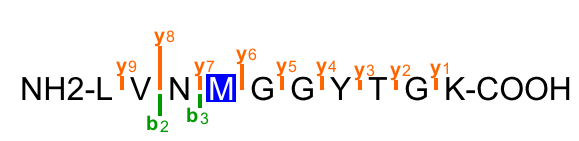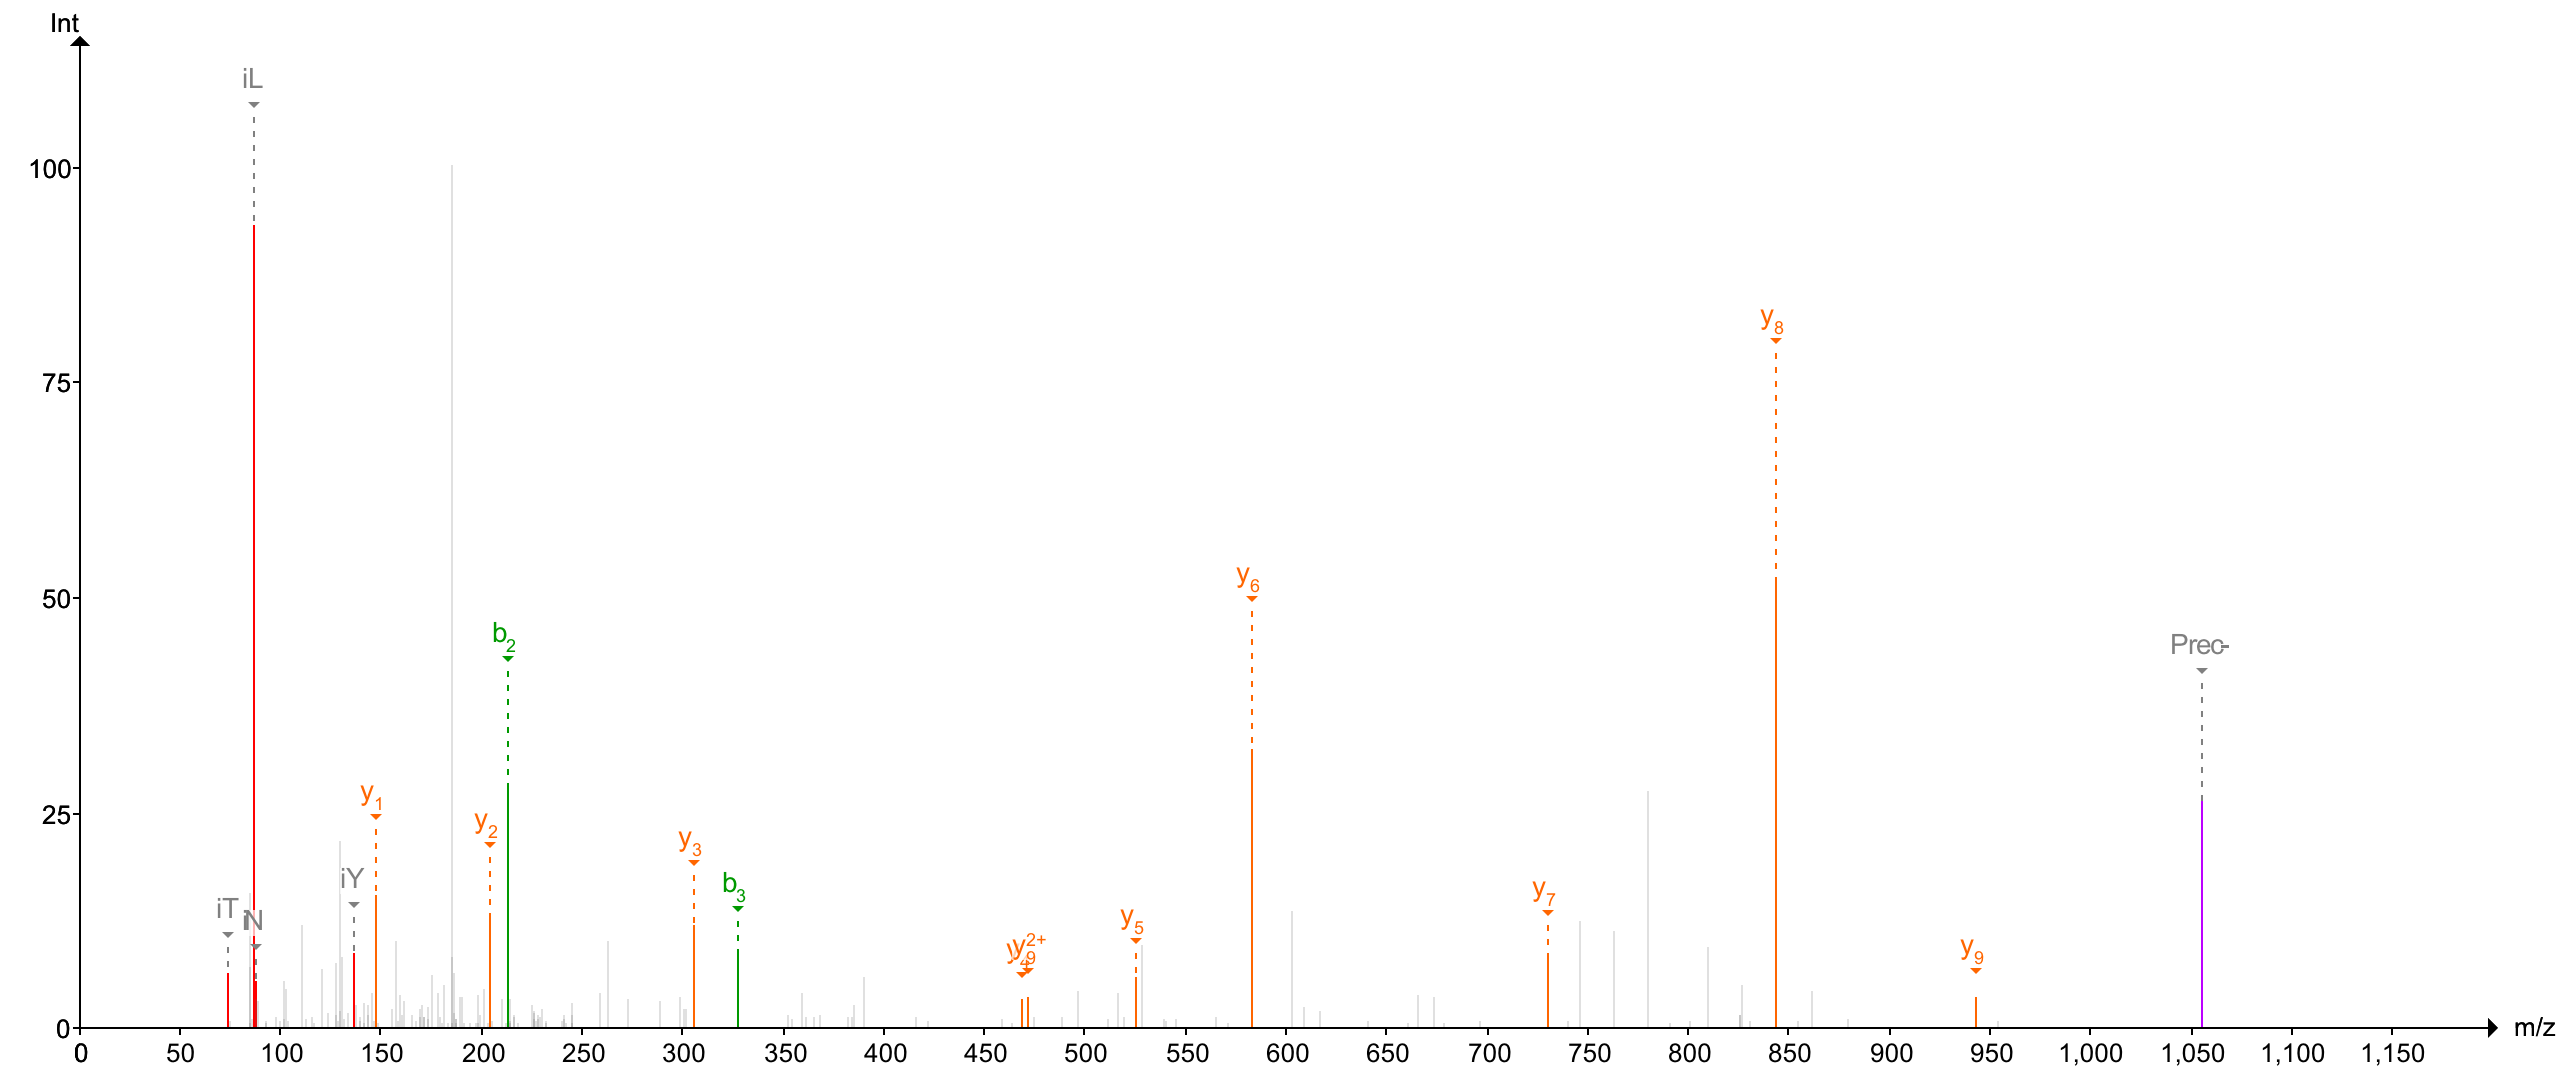



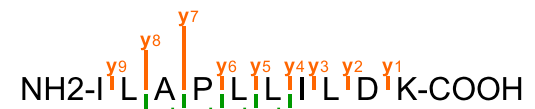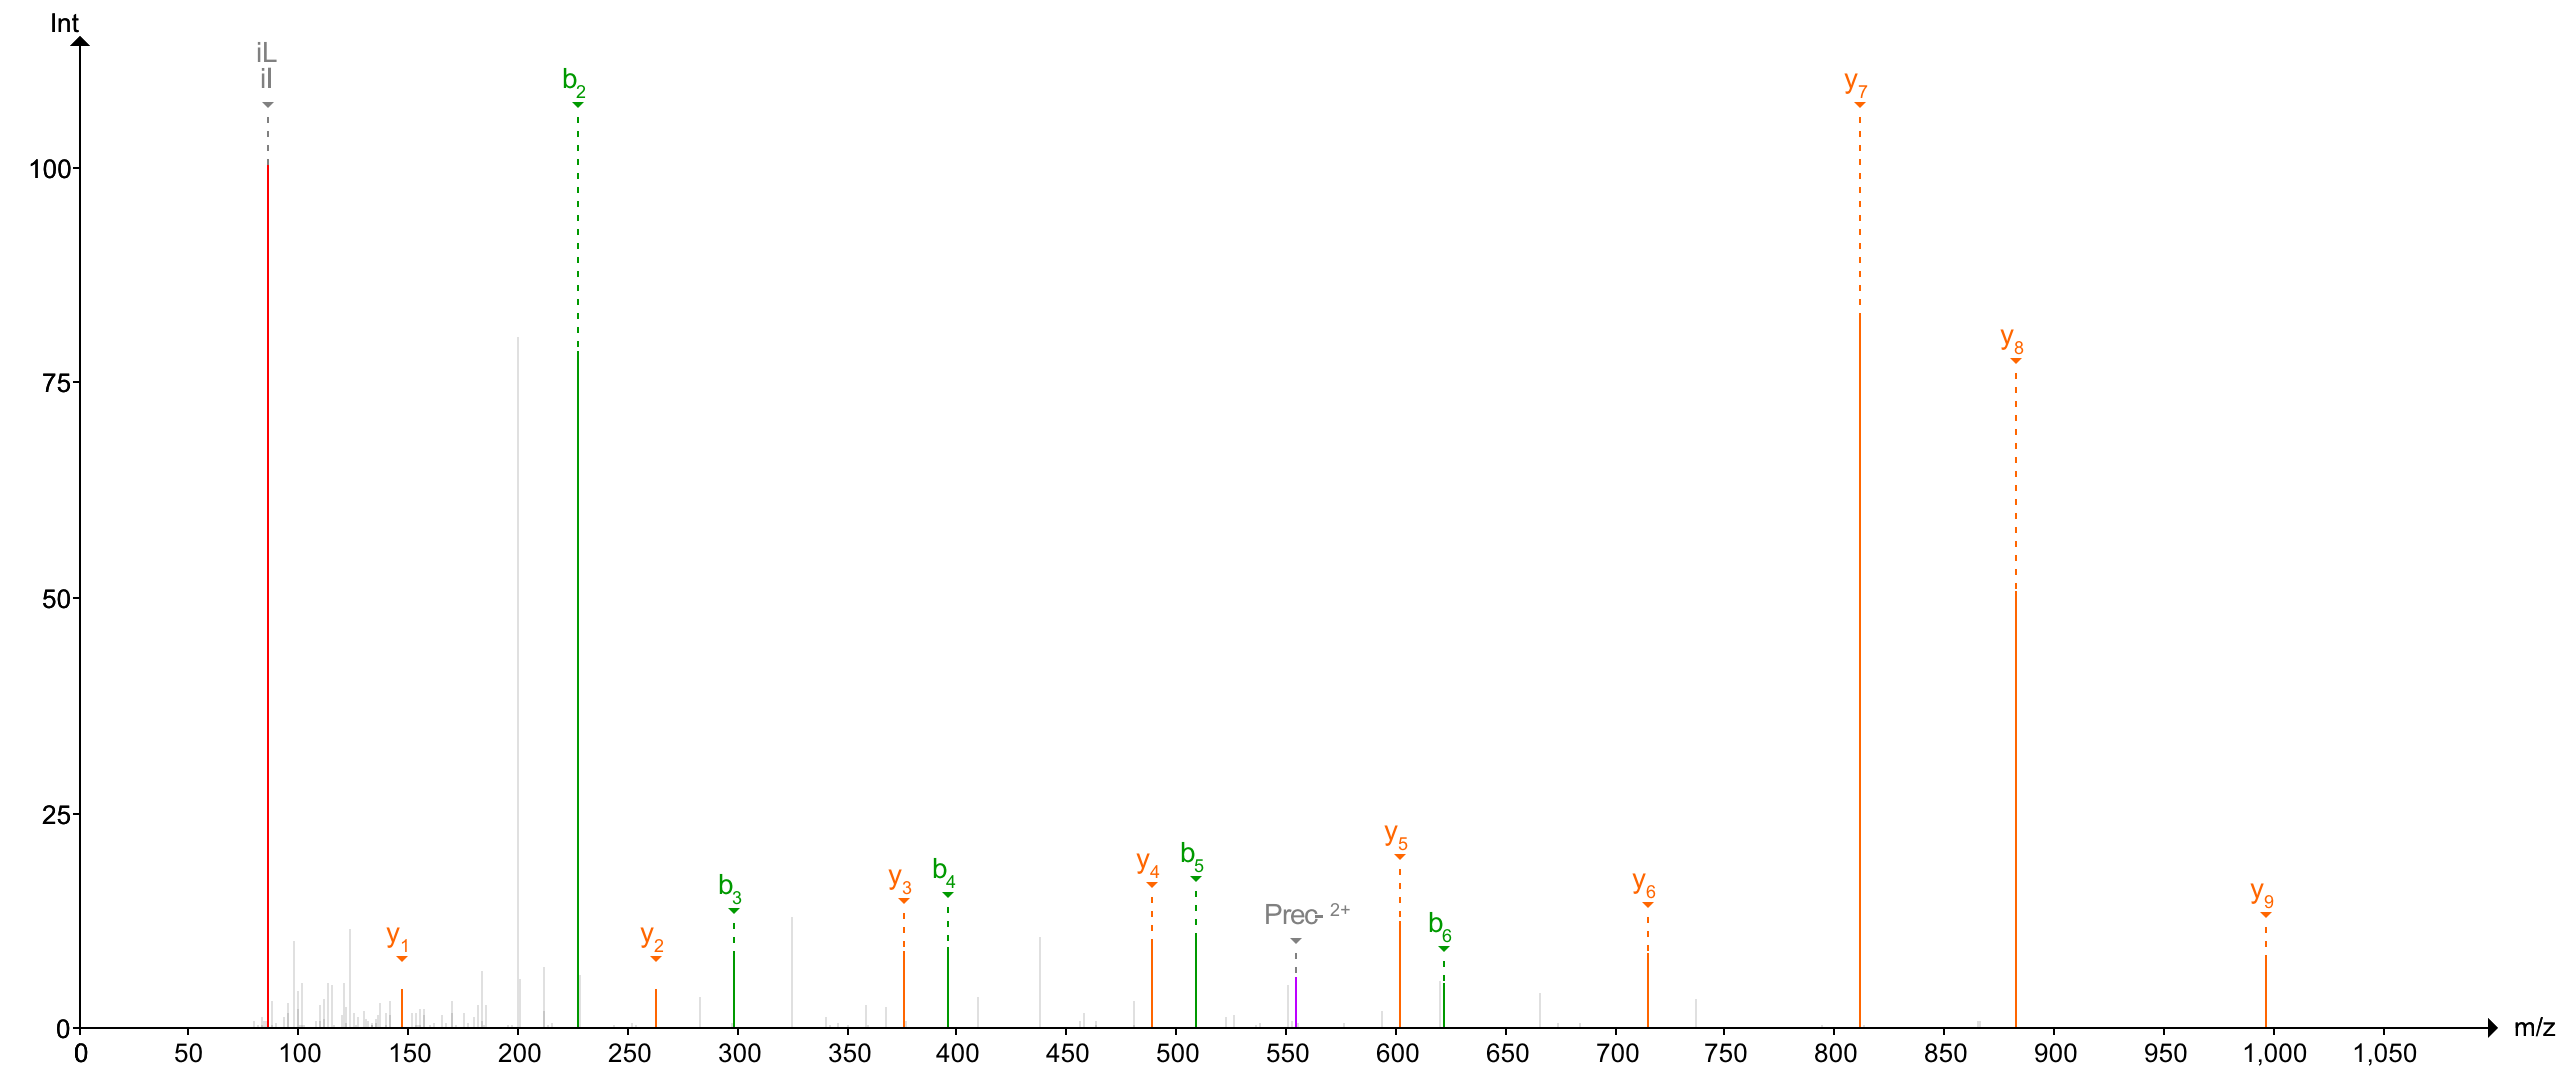

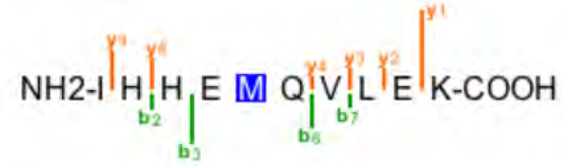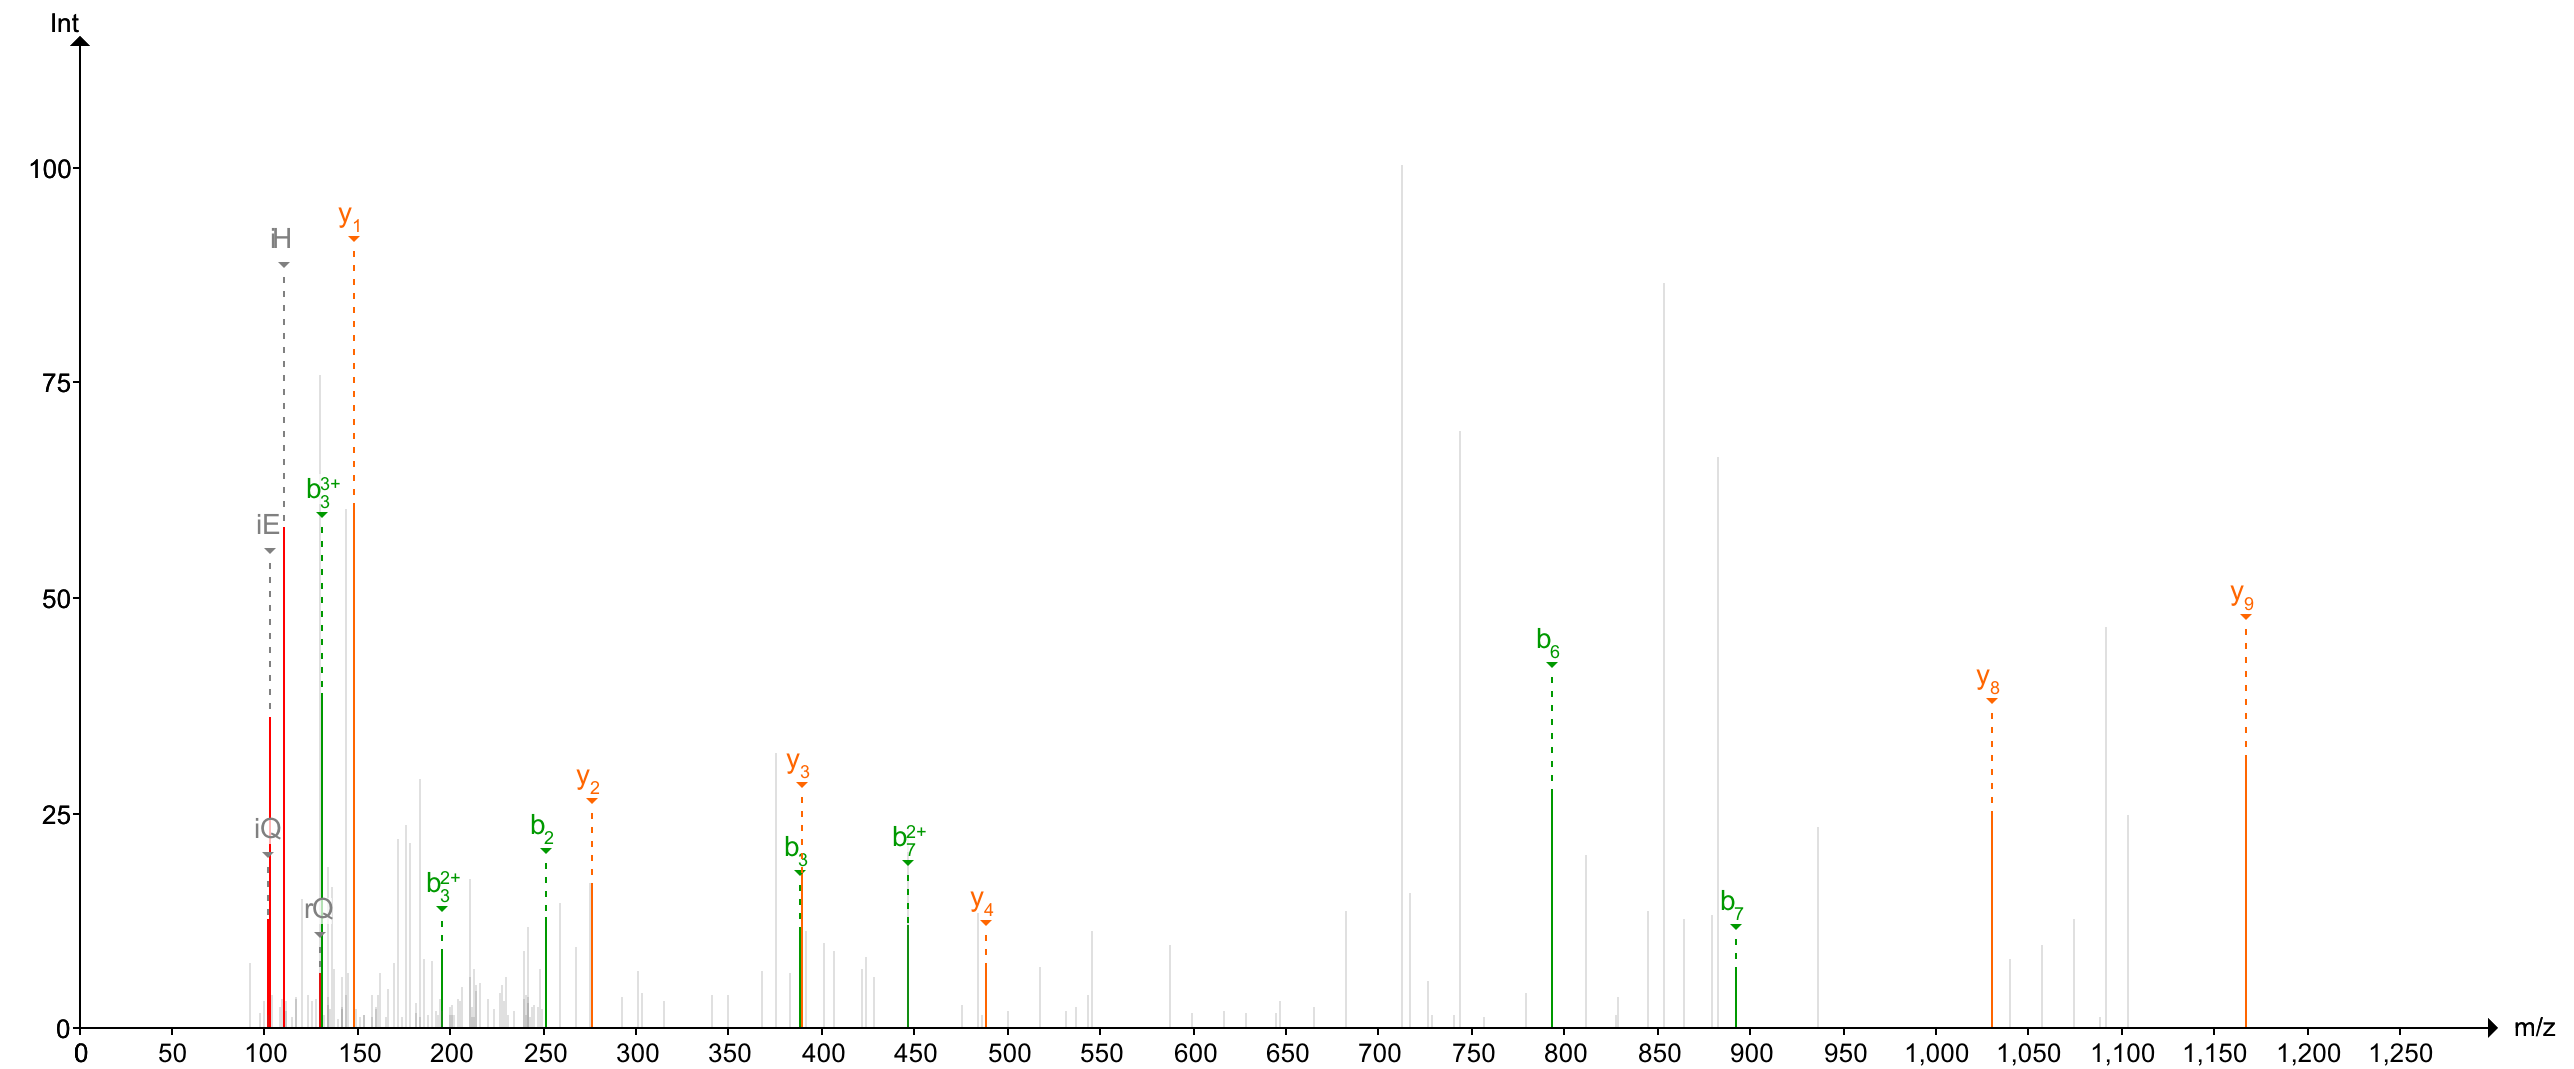

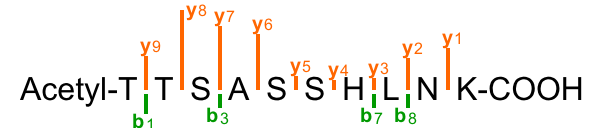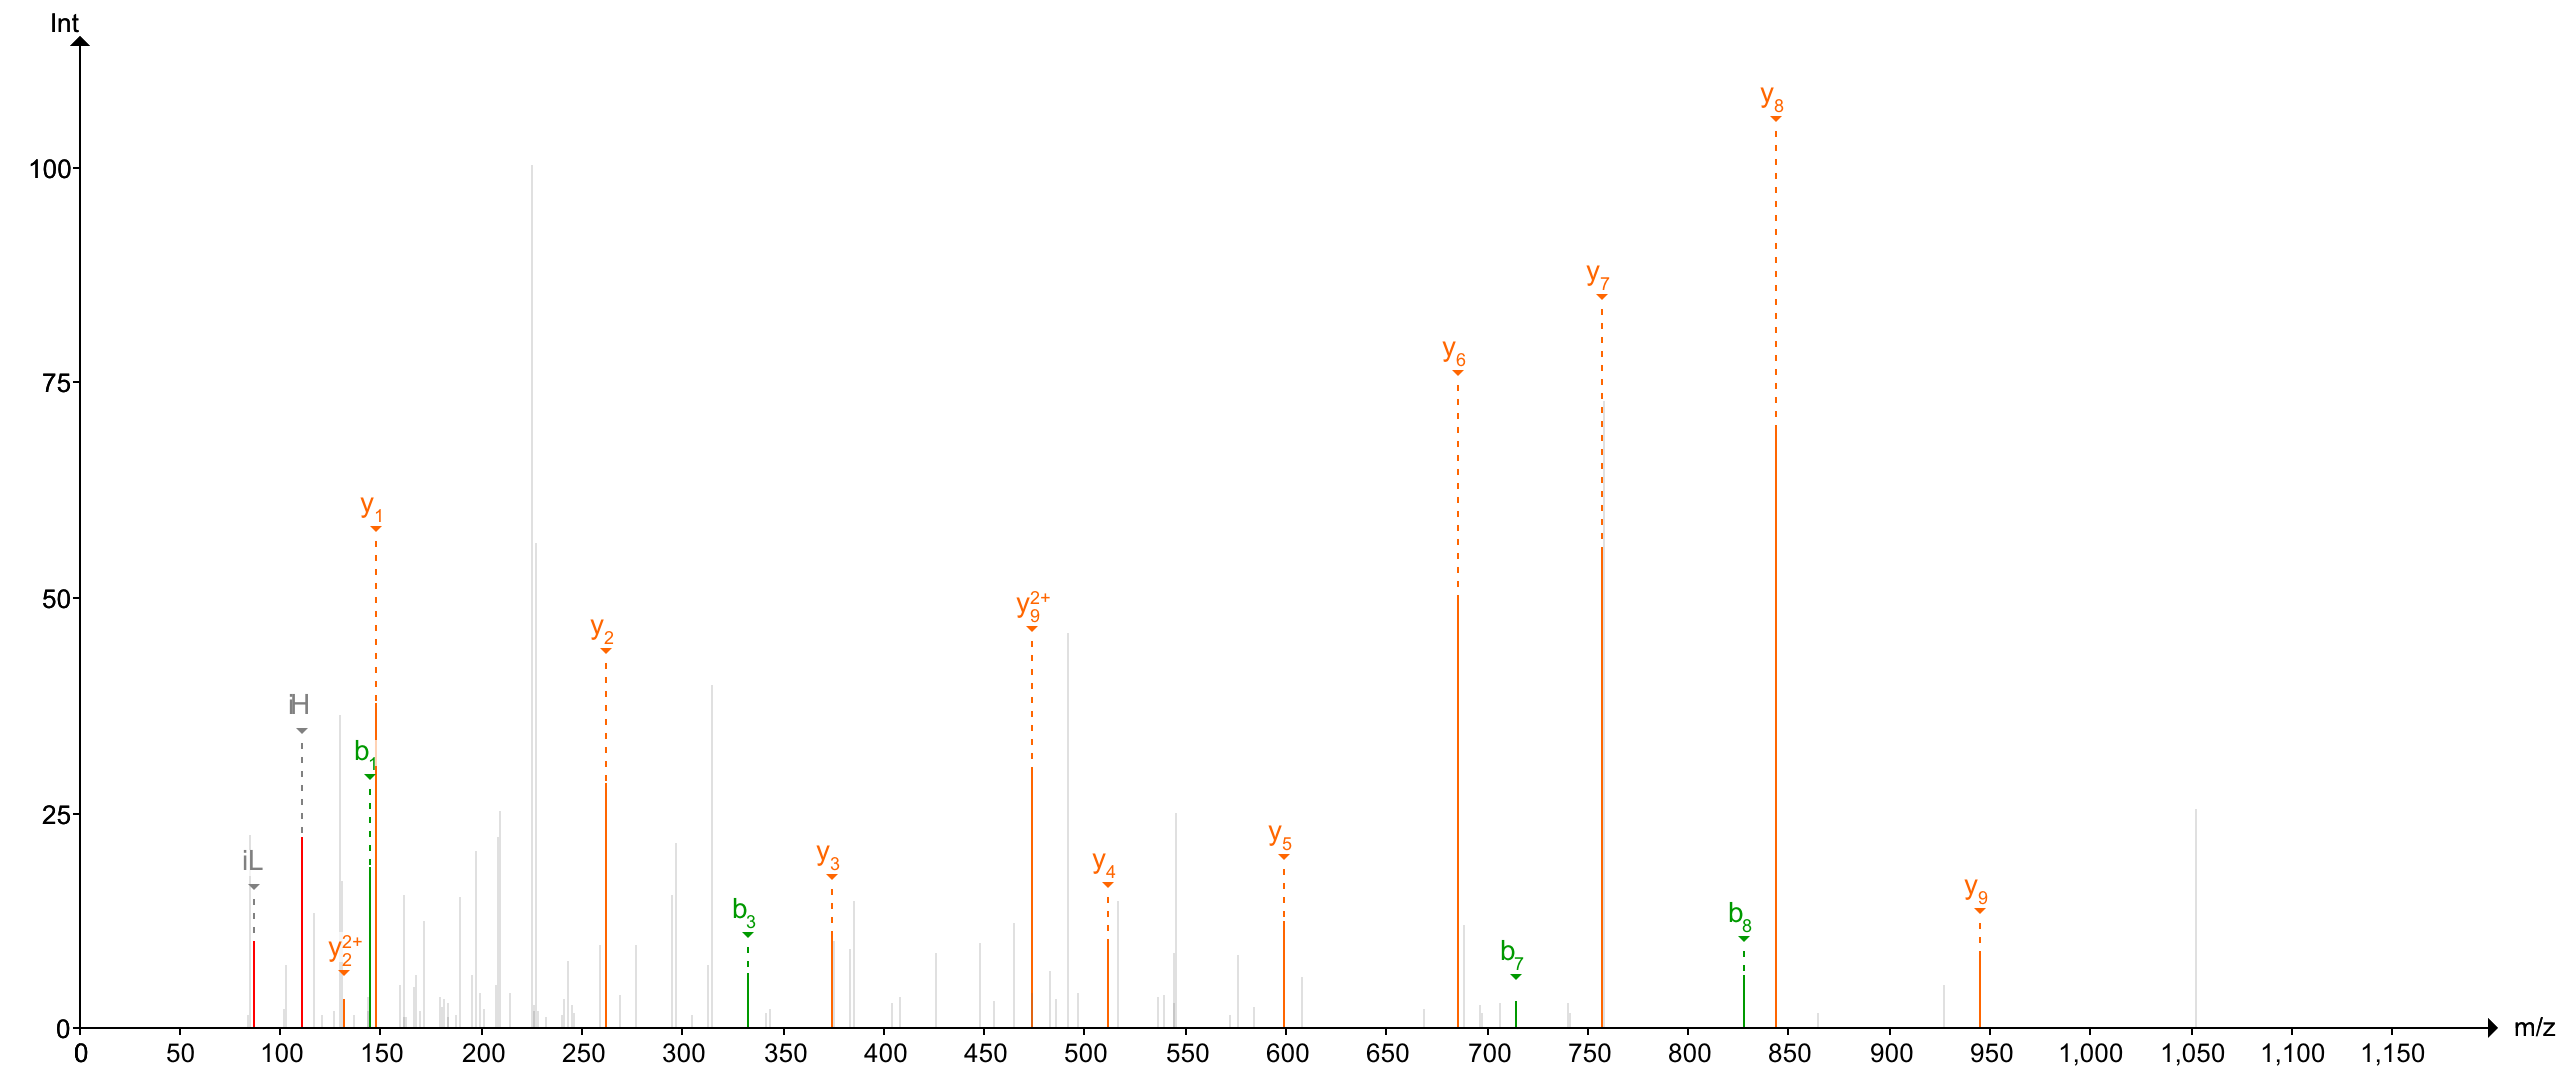

NH<sub>2</sub>-T P I I L S K P P A E R-COOH

y<sub>11</sub> y<sub>10</sub> y<sub>9</sub> y<sub>8</sub> y<sub>7</sub> y<sub>6</sub> y<sub>5</sub>  
b<sub>2</sub> b<sub>3</sub> b<sub>4</sub>

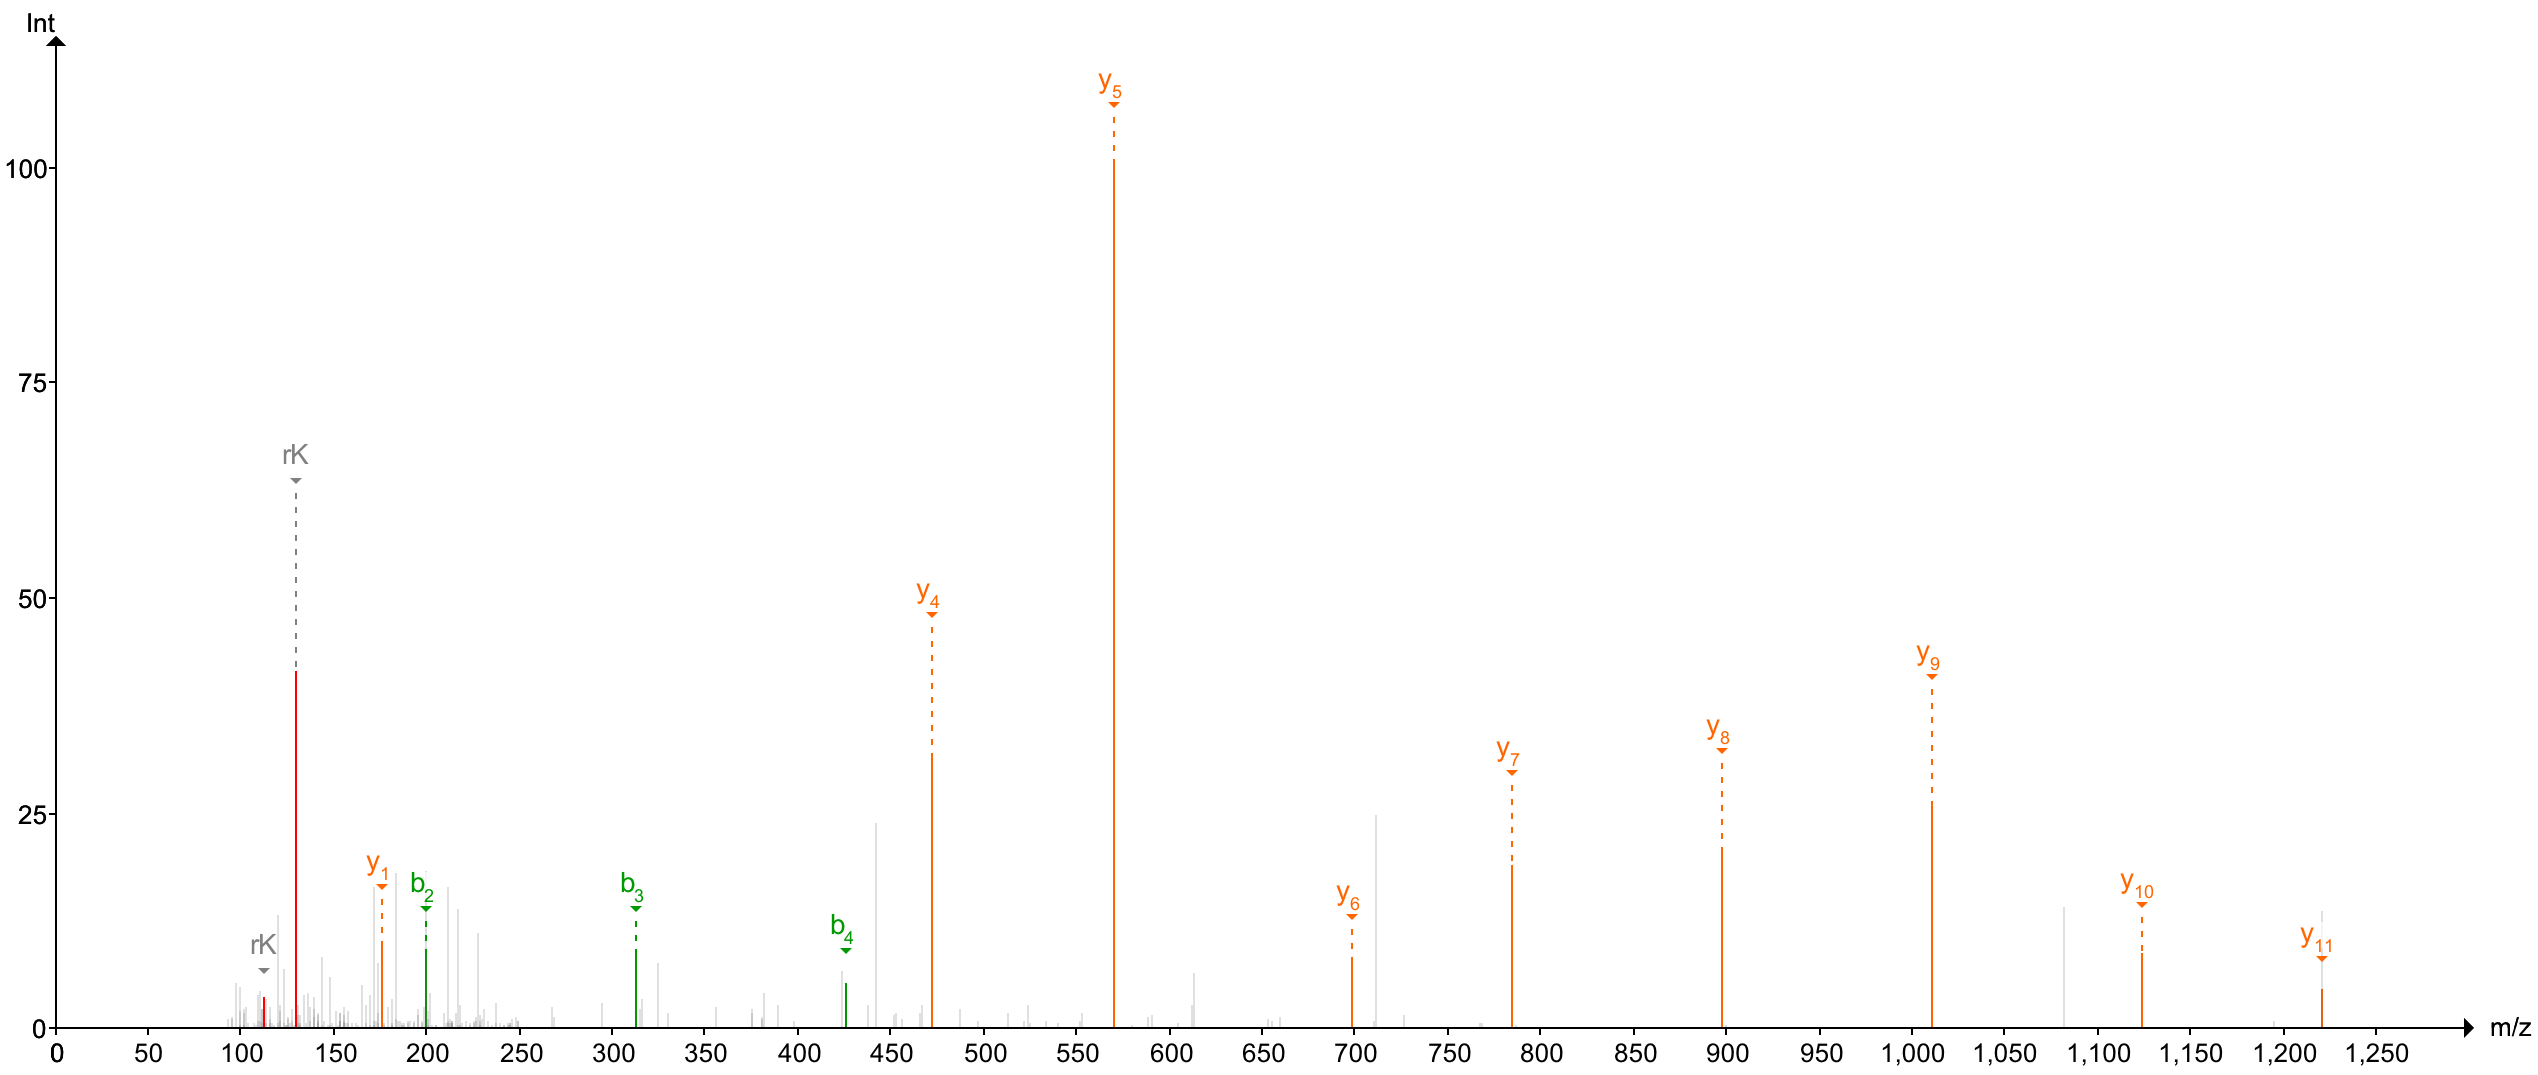

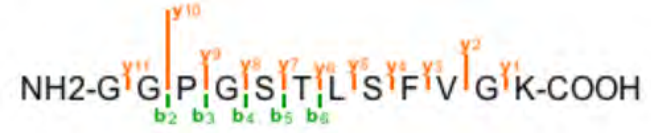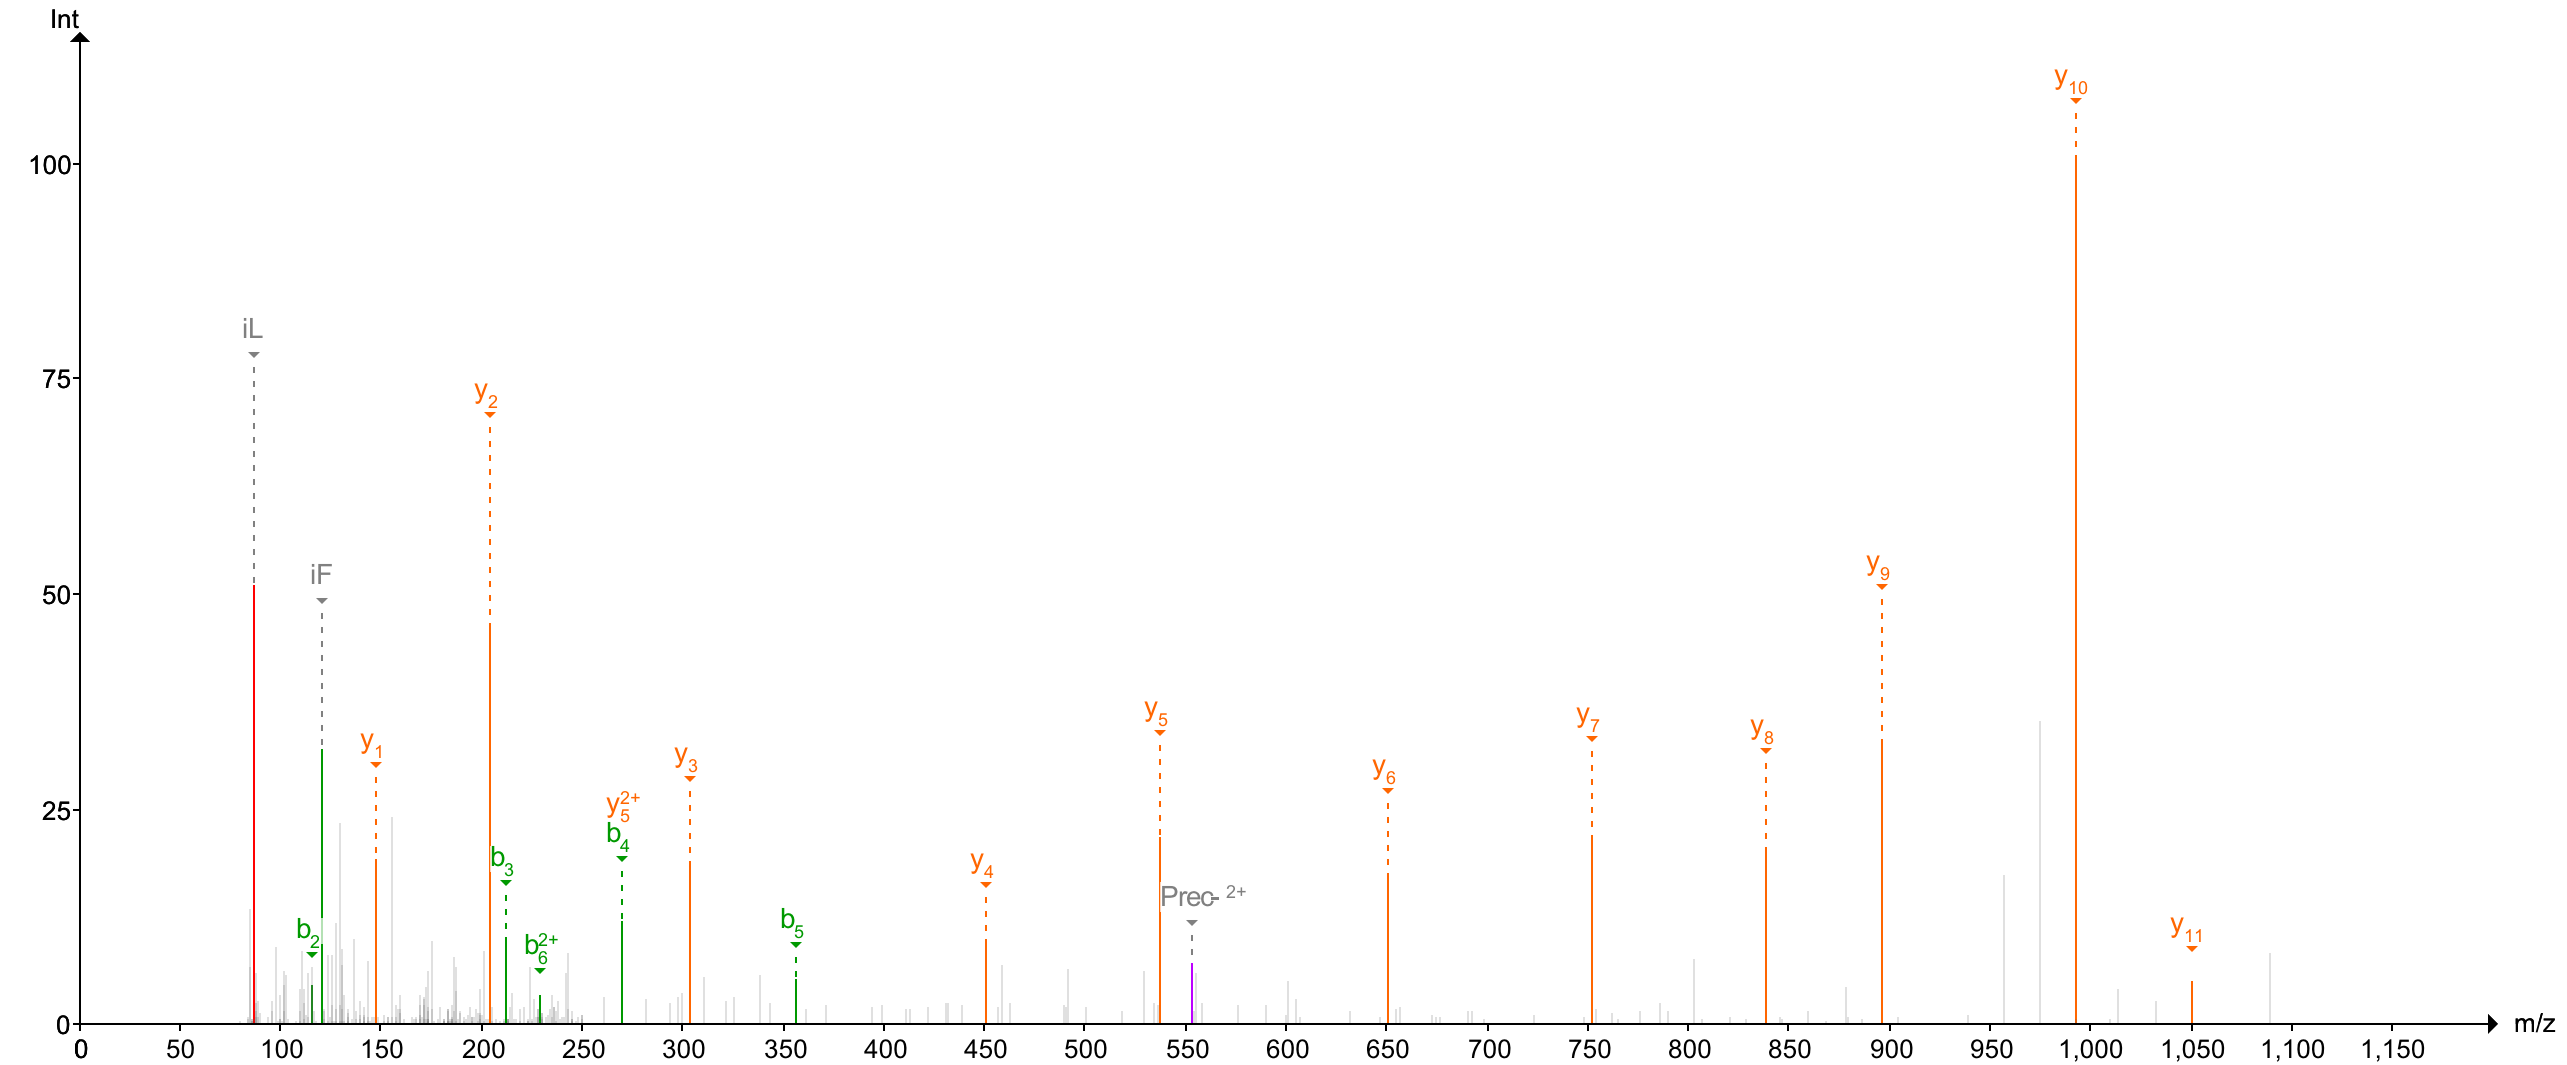

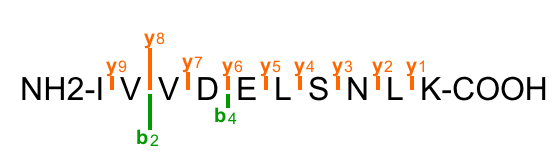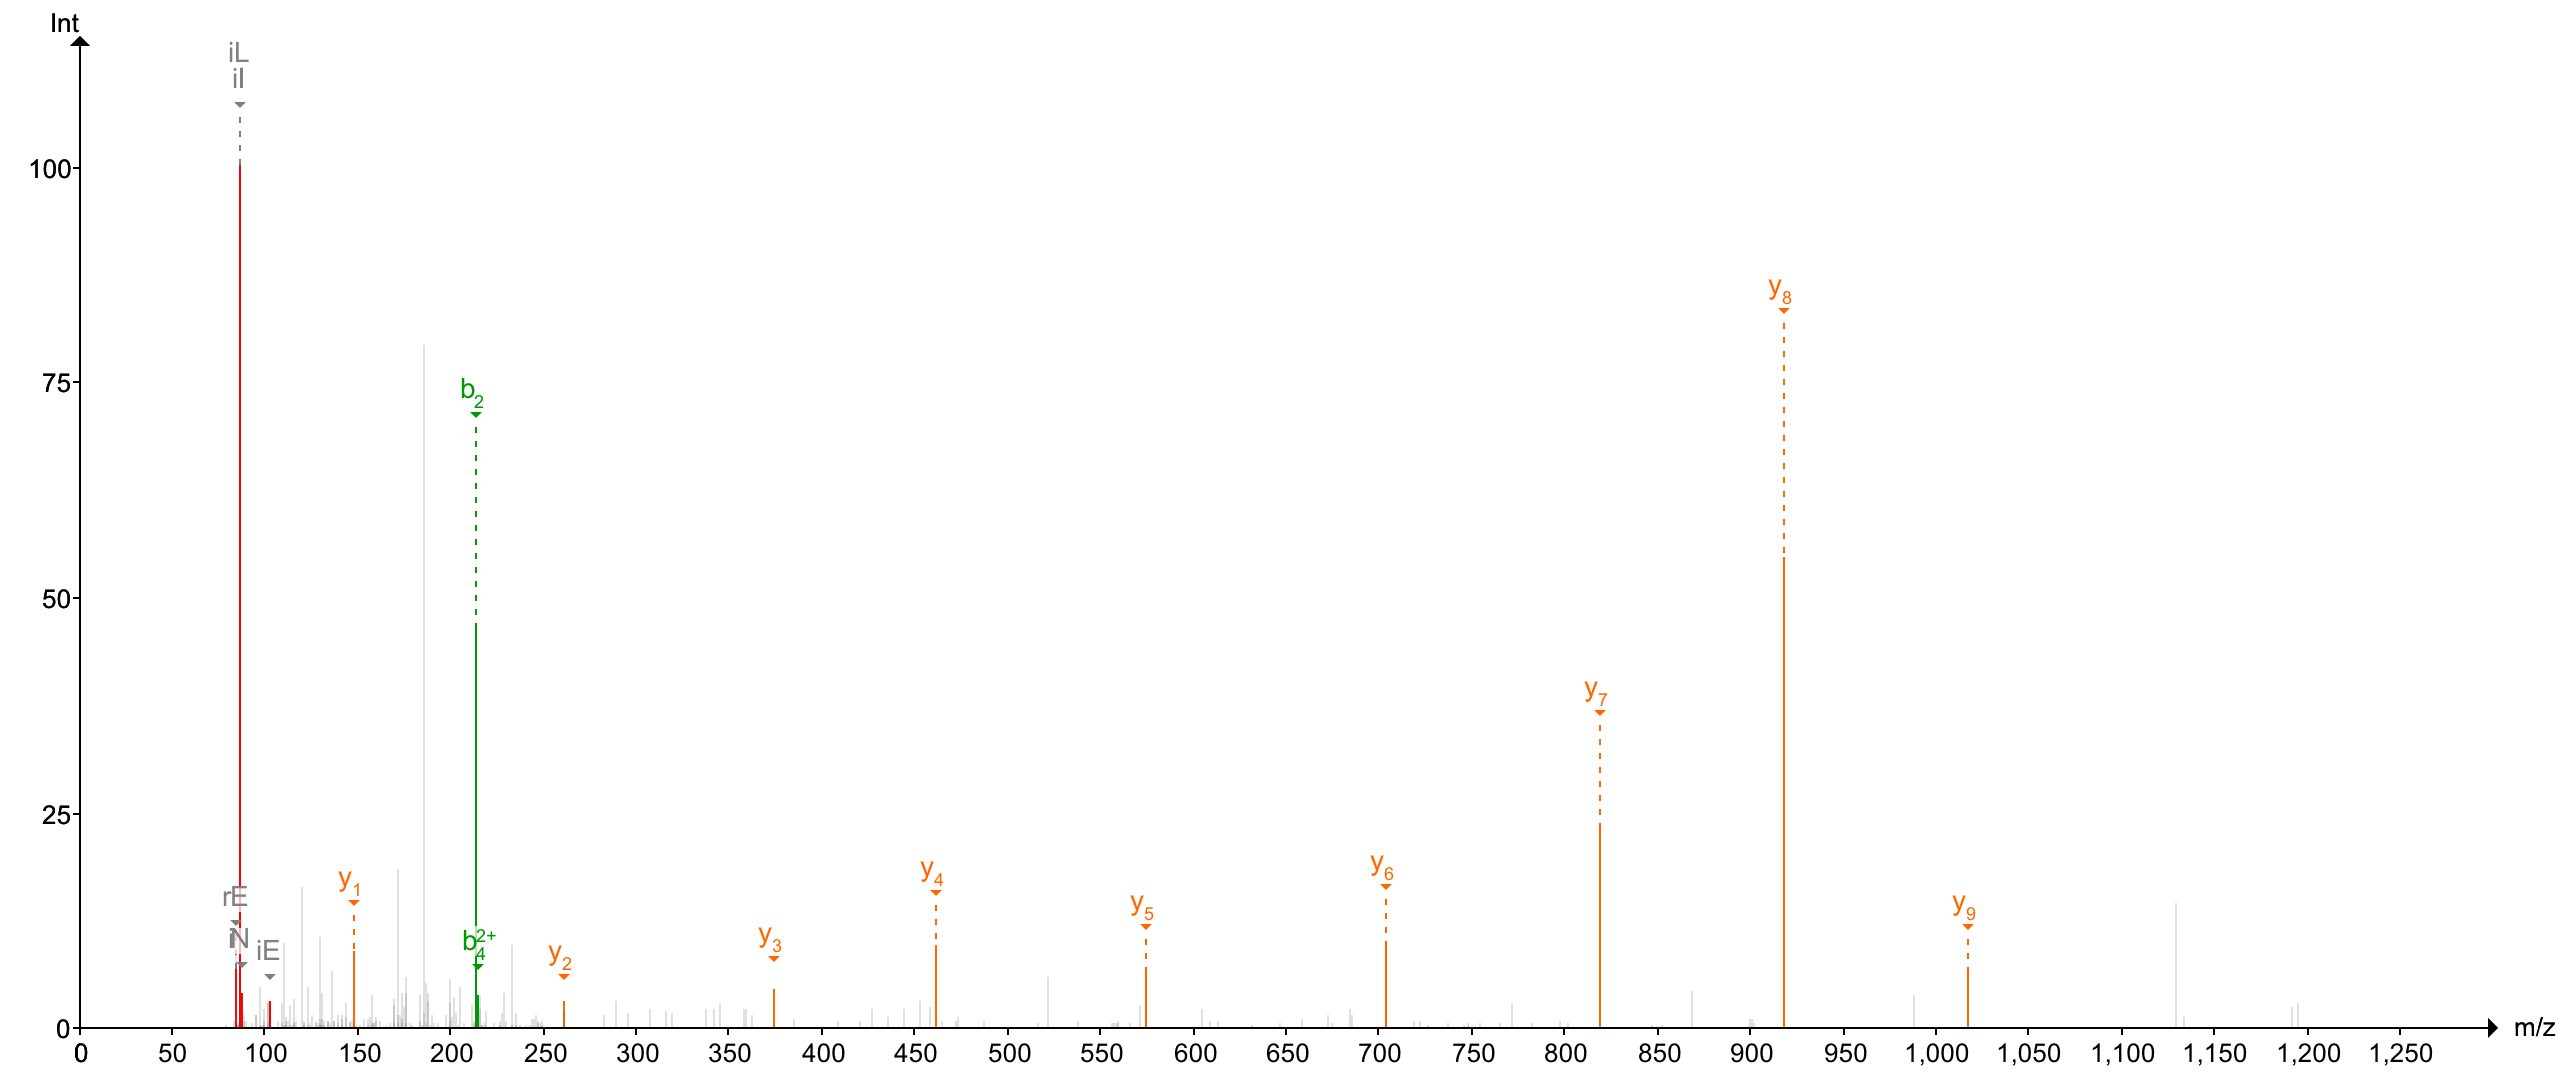



NH<sub>2</sub>-Q-G-L-L-P-V-L-E-S-F-K-COOH

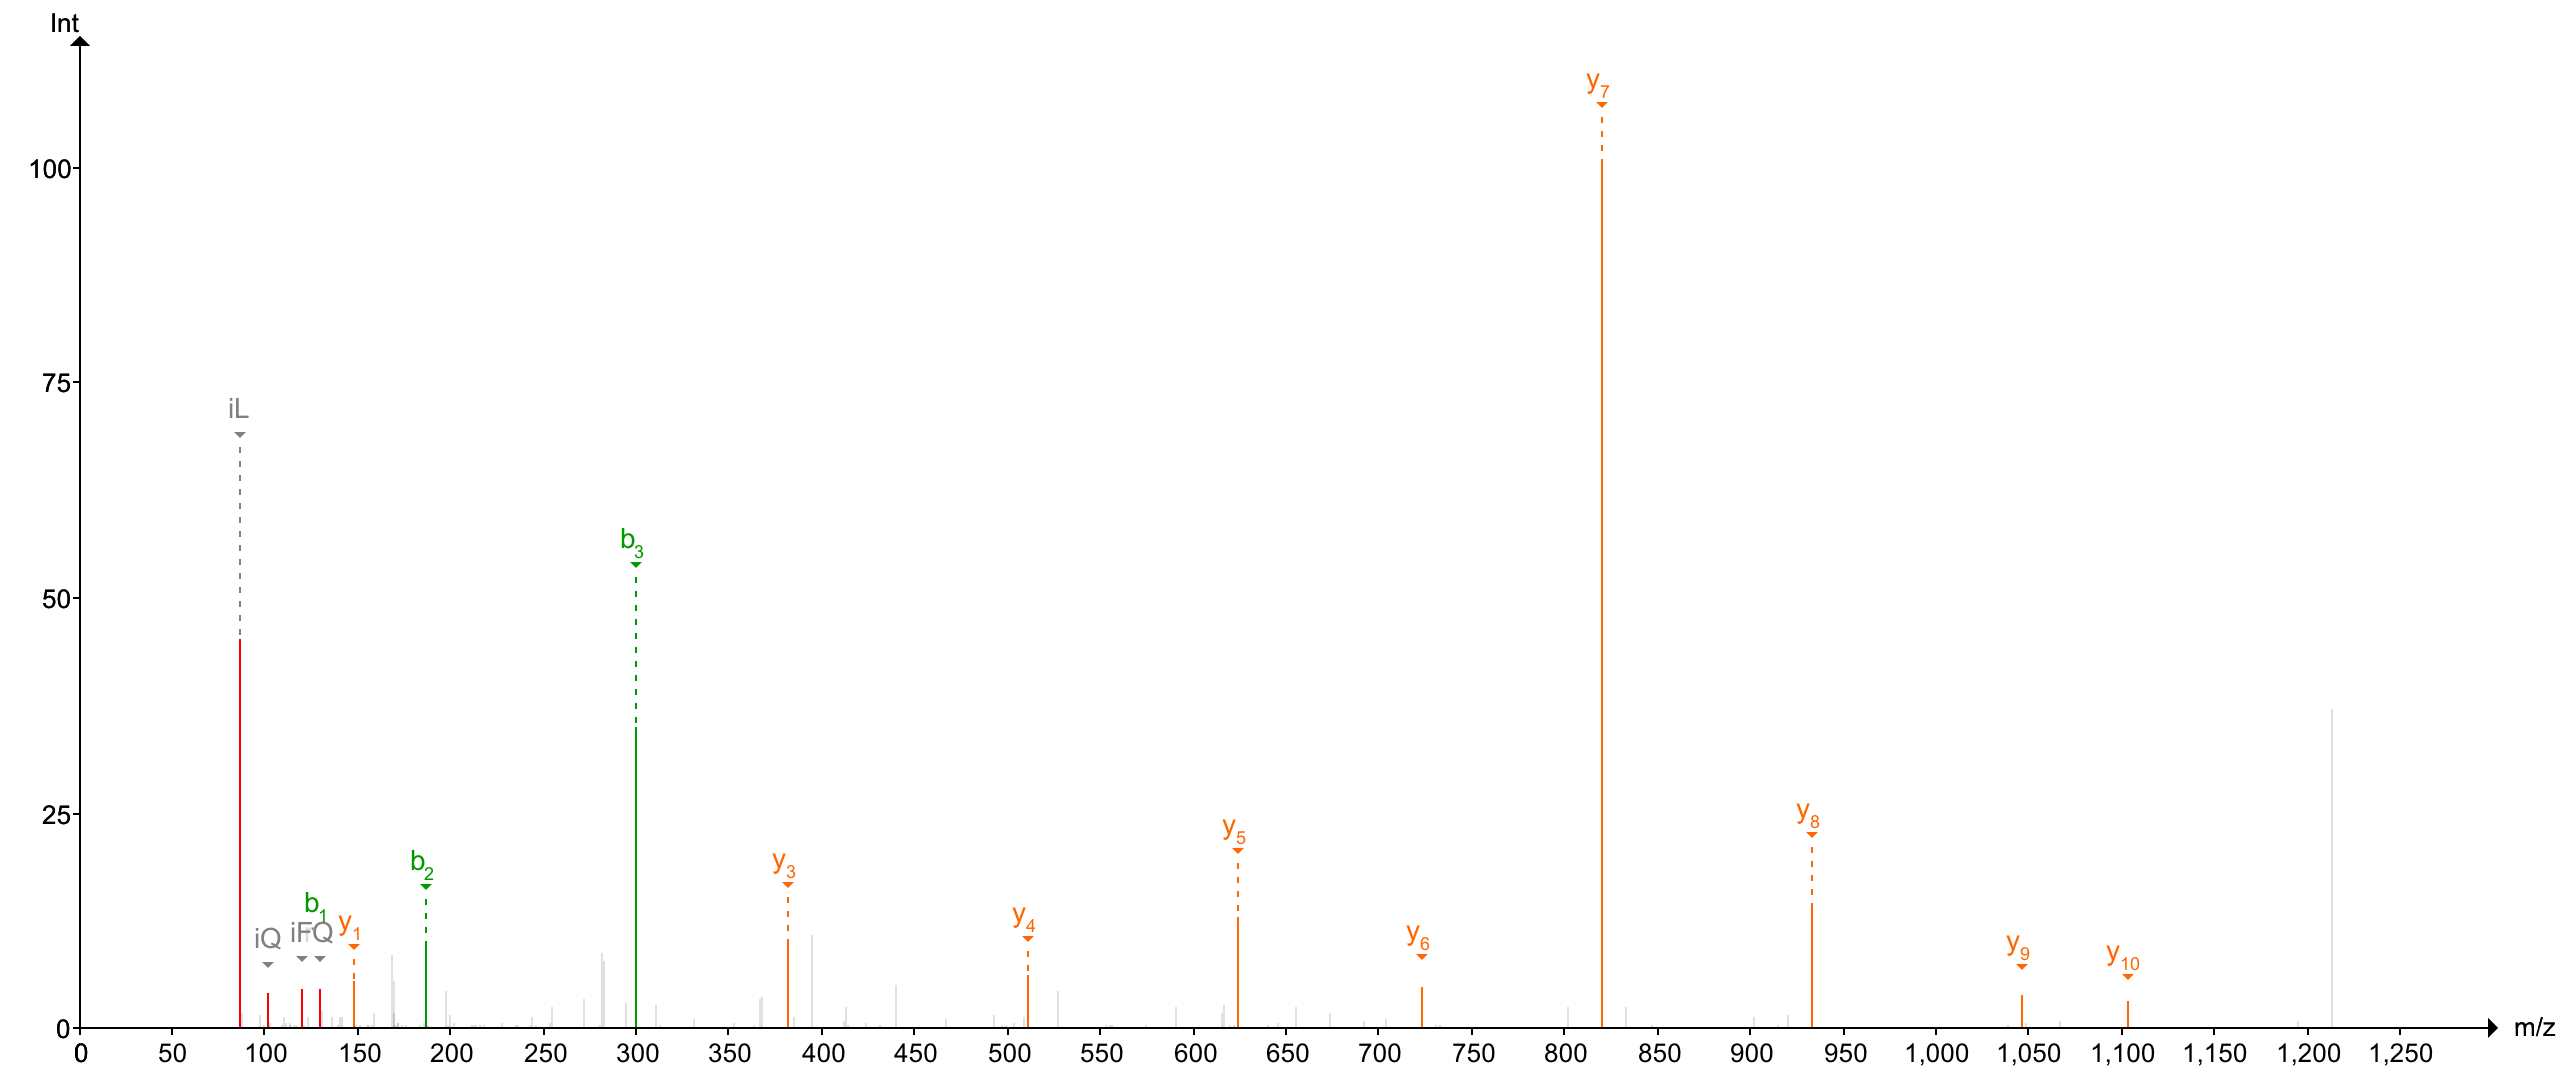

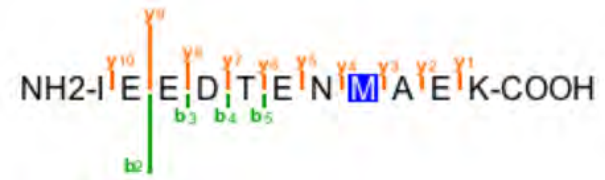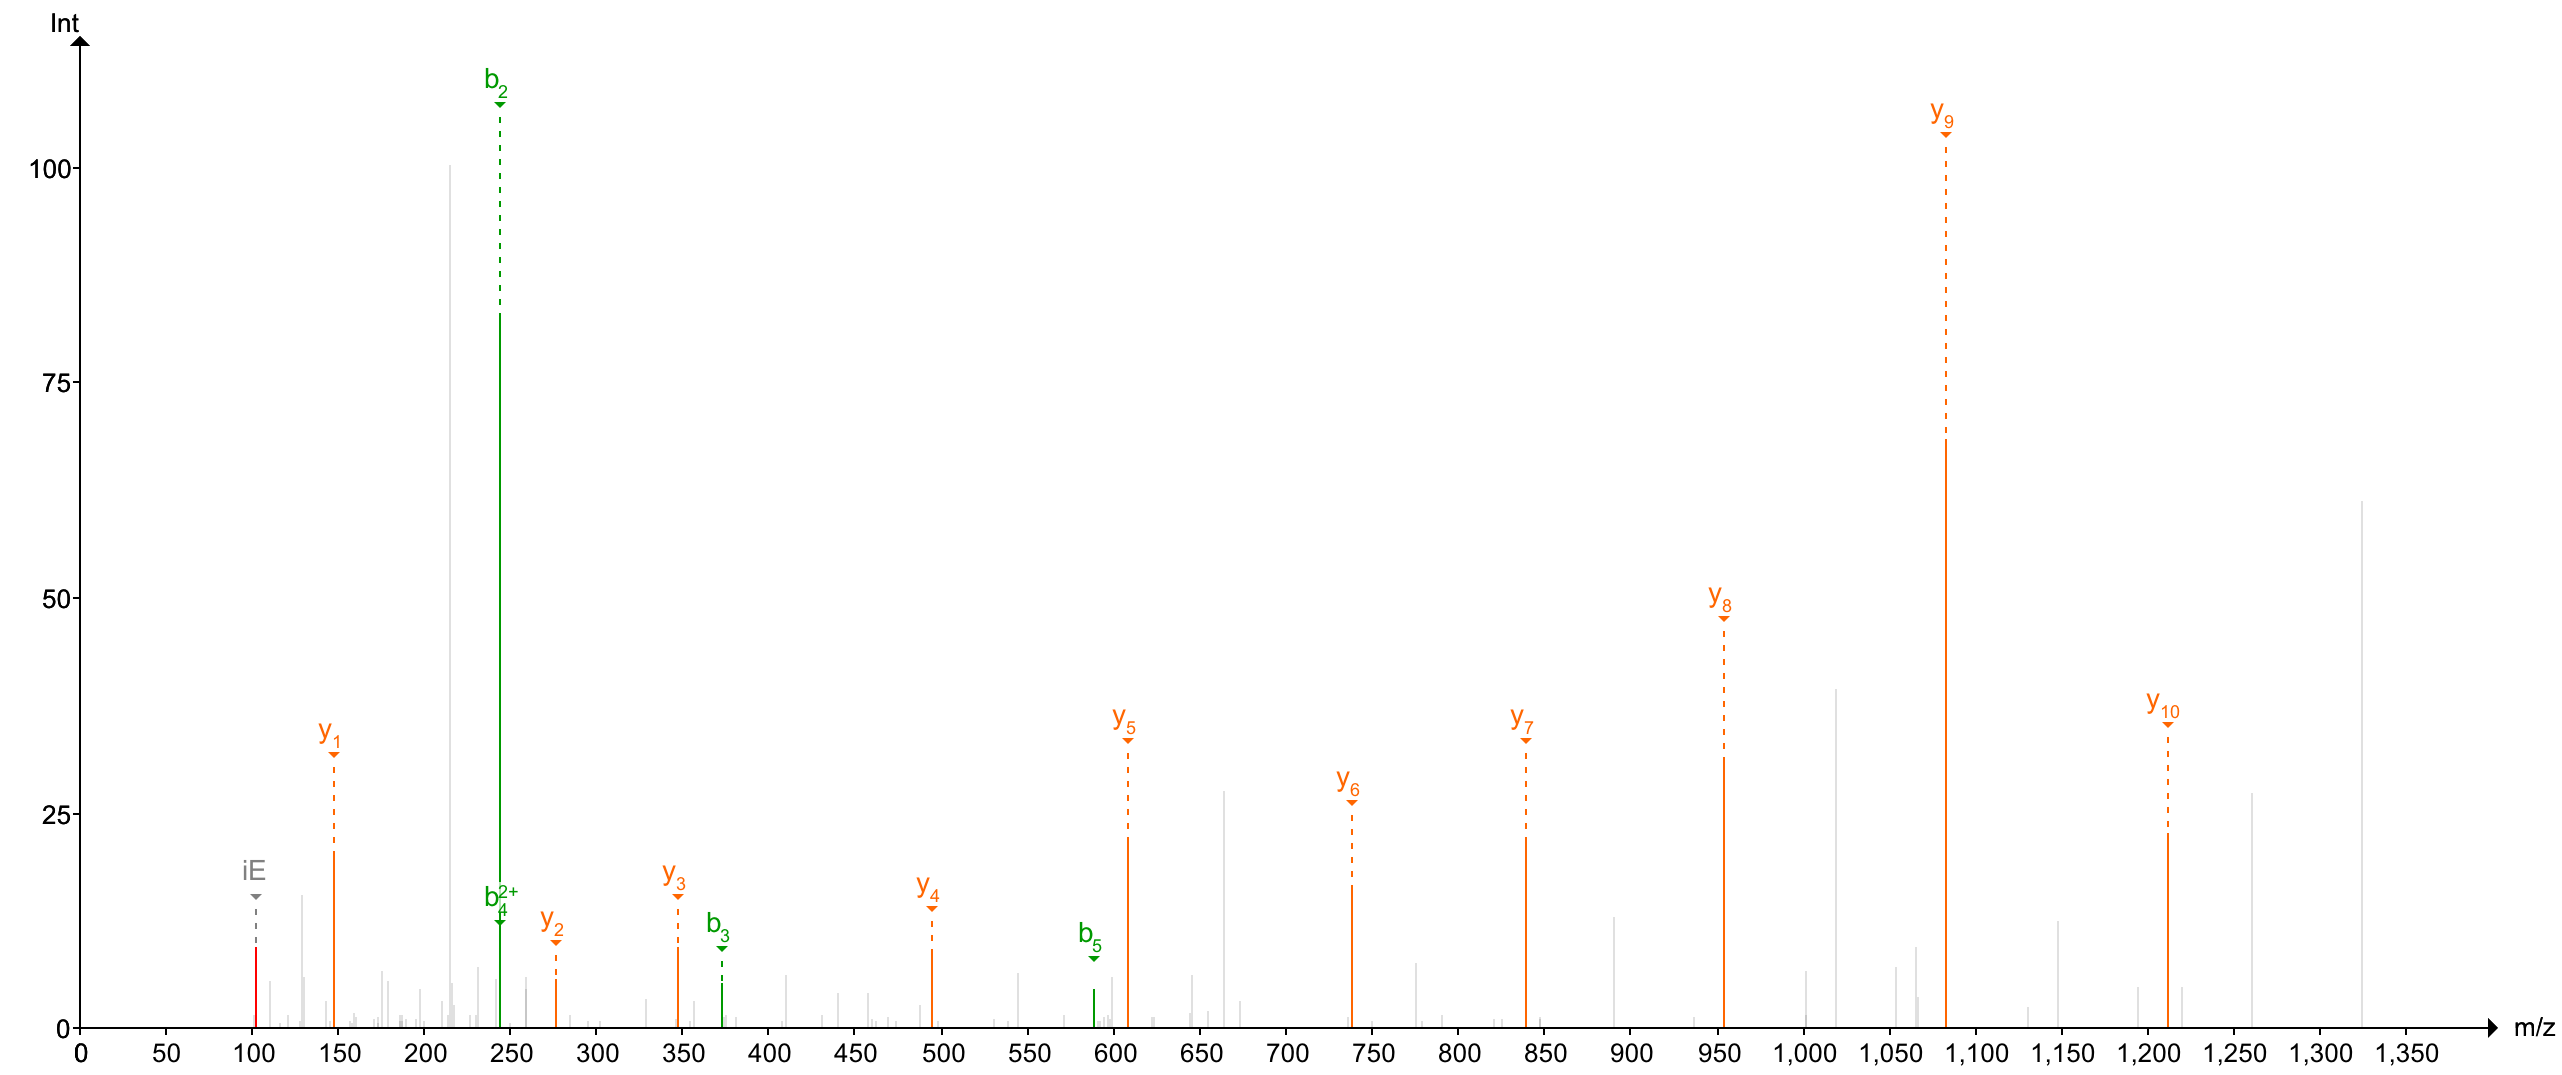

NH<sub>2</sub>-S Q L I G A H H T T P V G D G A A G T R-COOH

b<sub>2</sub> b<sub>3</sub> b<sub>6</sub> b<sub>7</sub> b<sub>8</sub> b<sub>9</sub> y<sub>10</sub> y<sub>17</sub> y<sub>16</sub> y<sub>14</sub> y<sub>13</sub> y<sub>12</sub> y<sub>11</sub> y<sub>9</sub> y<sub>8</sub> y<sub>7</sub> y<sub>6</sub> y<sub>5</sub> y<sub>4</sub> y<sub>3</sub> b<sub>14</sub> b<sub>15</sub> y<sub>15</sub> y<sub>1</sub> y<sub>2</sub> y<sub>3</sub> y<sub>4</sub> y<sub>5</sub> y<sub>6</sub> y<sub>7</sub> y<sub>8</sub> y<sub>9</sub> y<sub>10</sub> y<sub>11</sub> y<sub>12</sub> y<sub>13</sub> y<sub>14</sub> y<sub>15</sub> y<sub>16</sub> y<sub>17</sub>

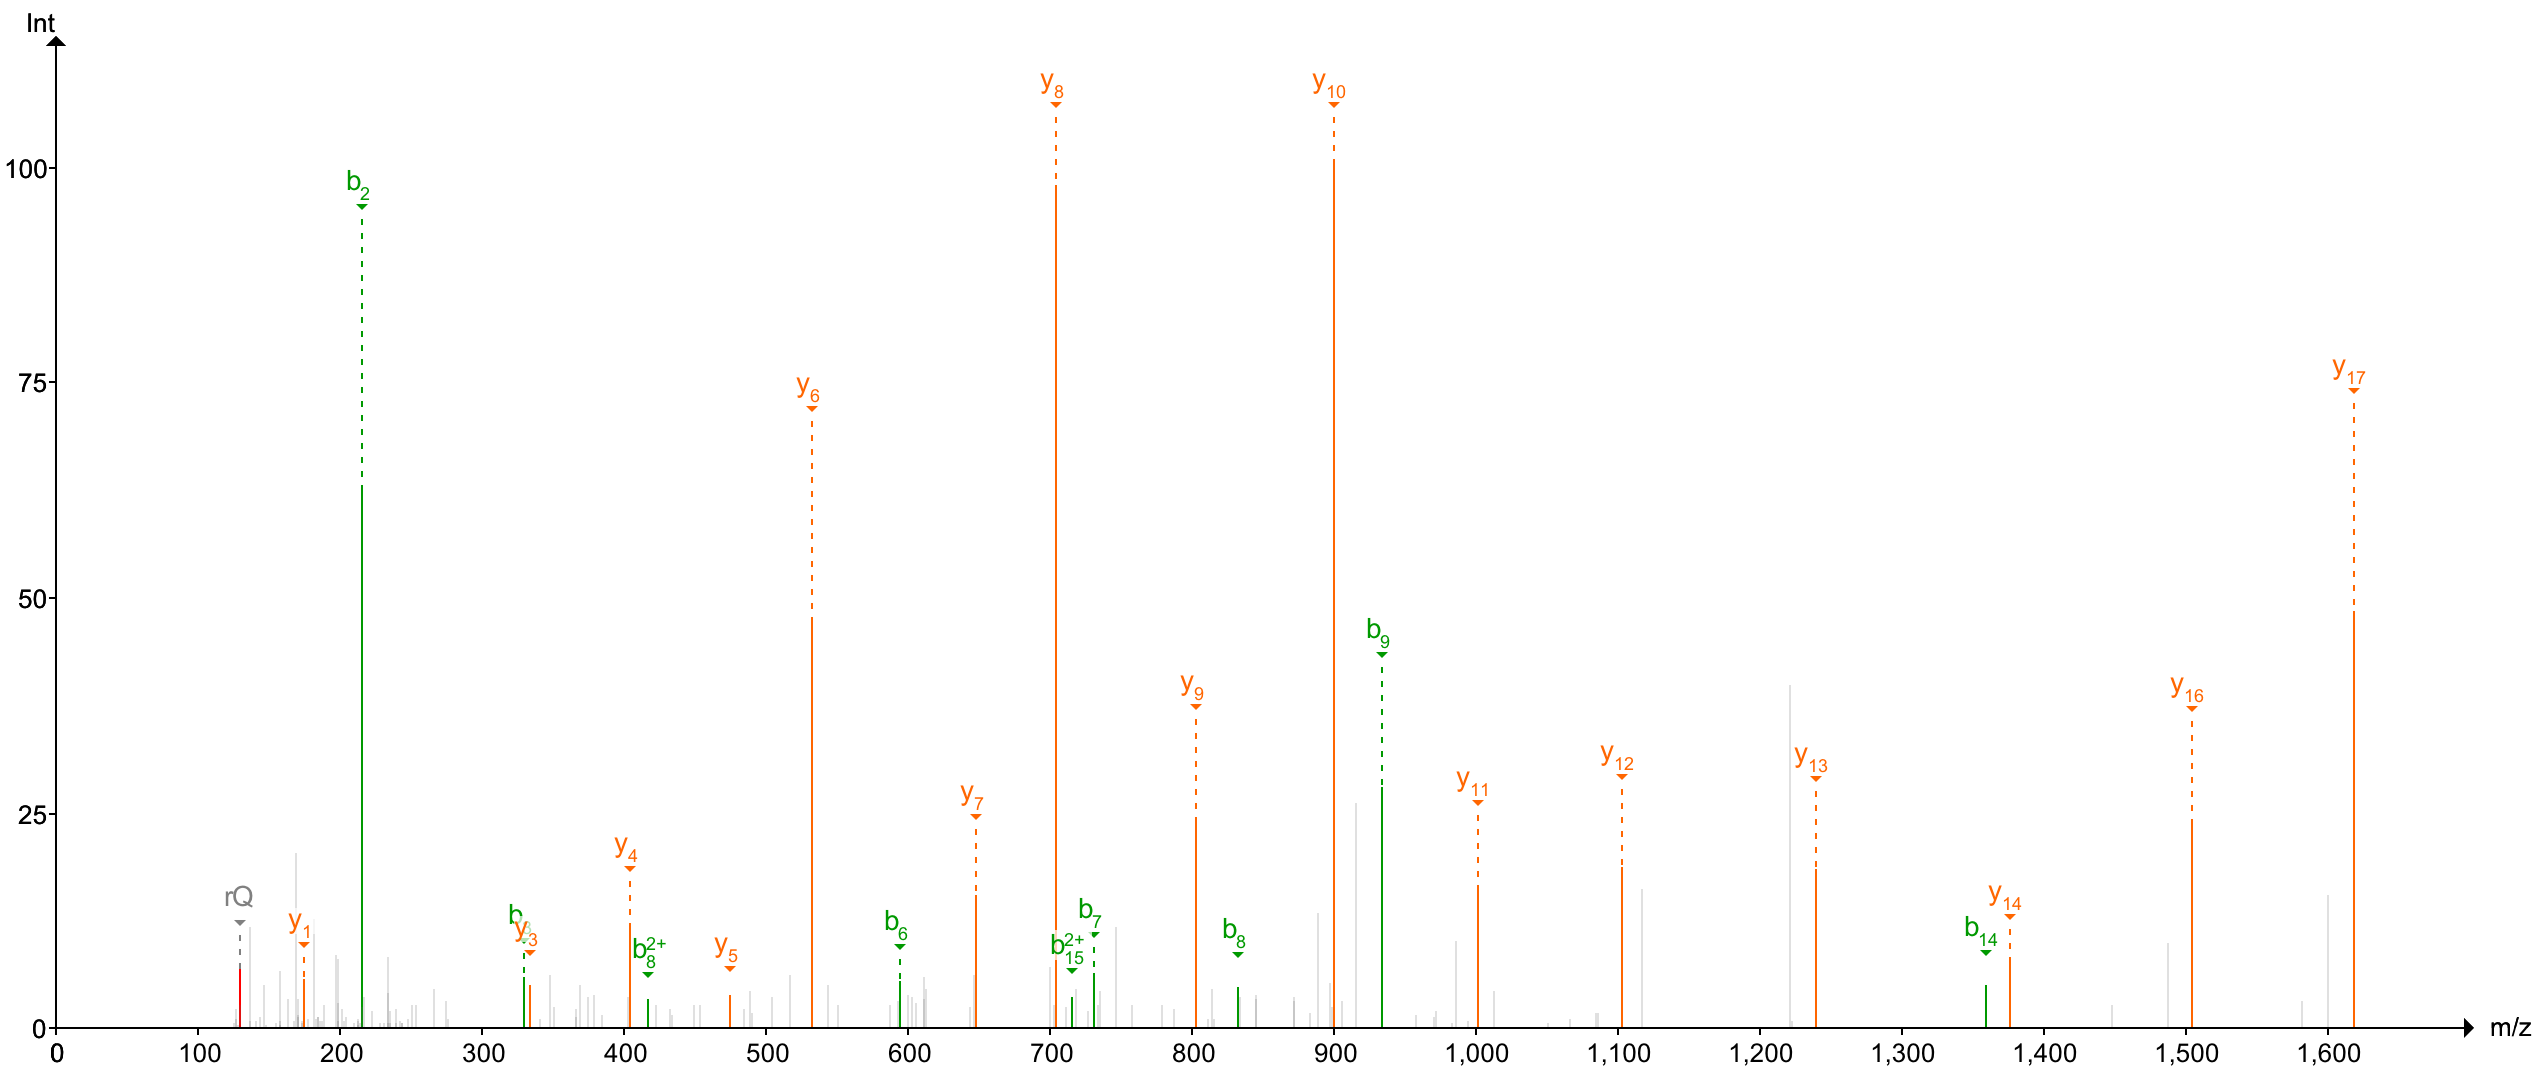

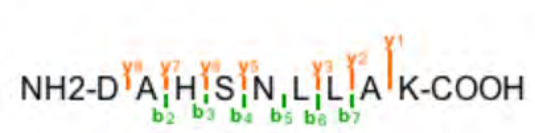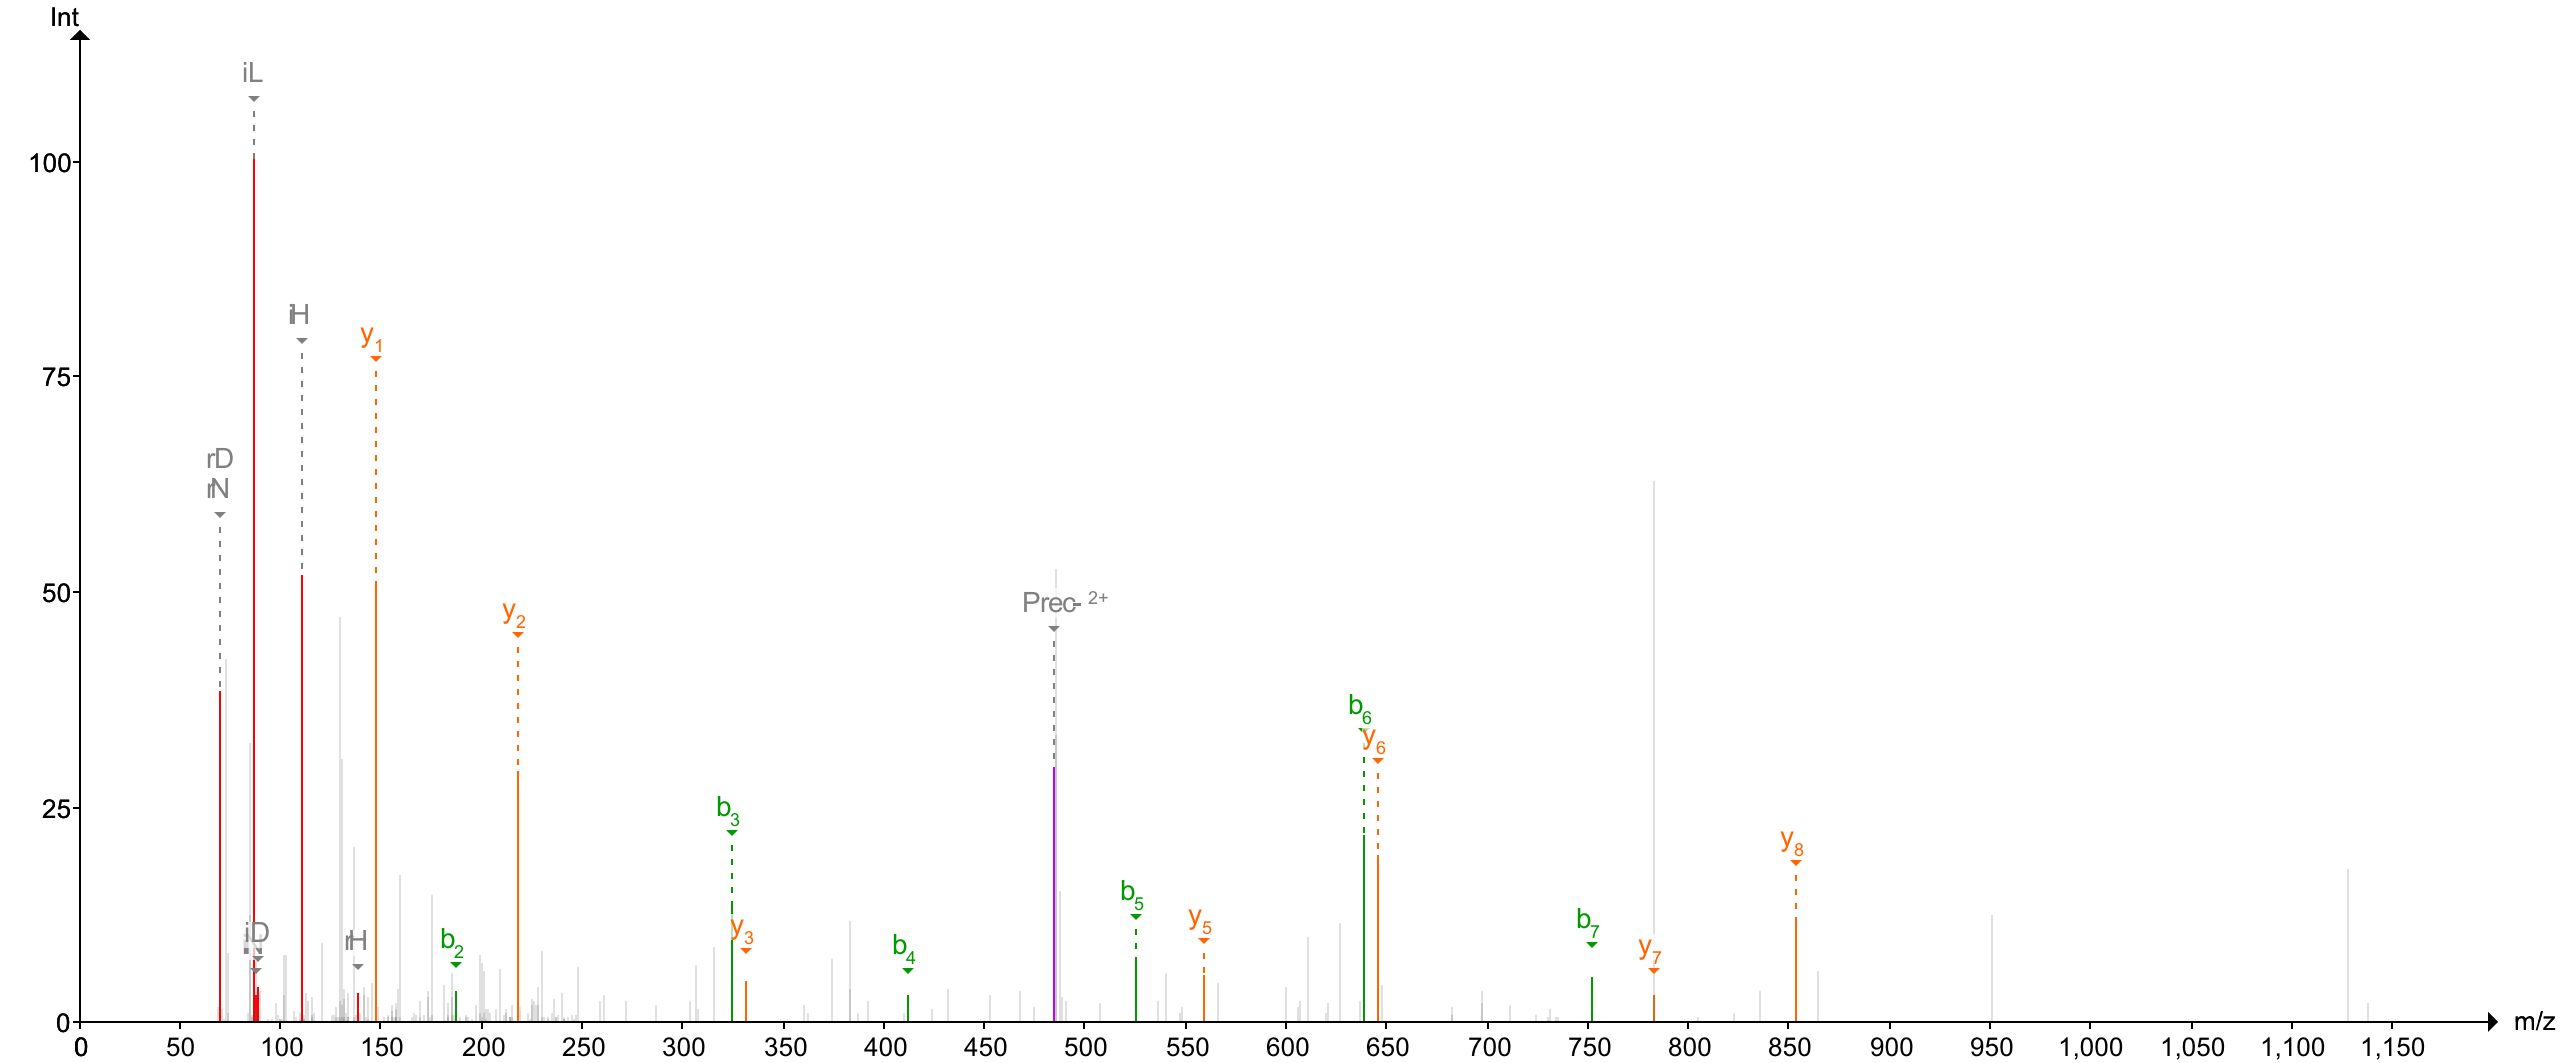

Acetyl-S<sub>1</sub>D<sub>1</sub>K<sub>1</sub>P<sub>1</sub>D<sub>1</sub>M<sub>1</sub>A<sub>1</sub>E<sub>1</sub>E<sub>1</sub>K-COOH

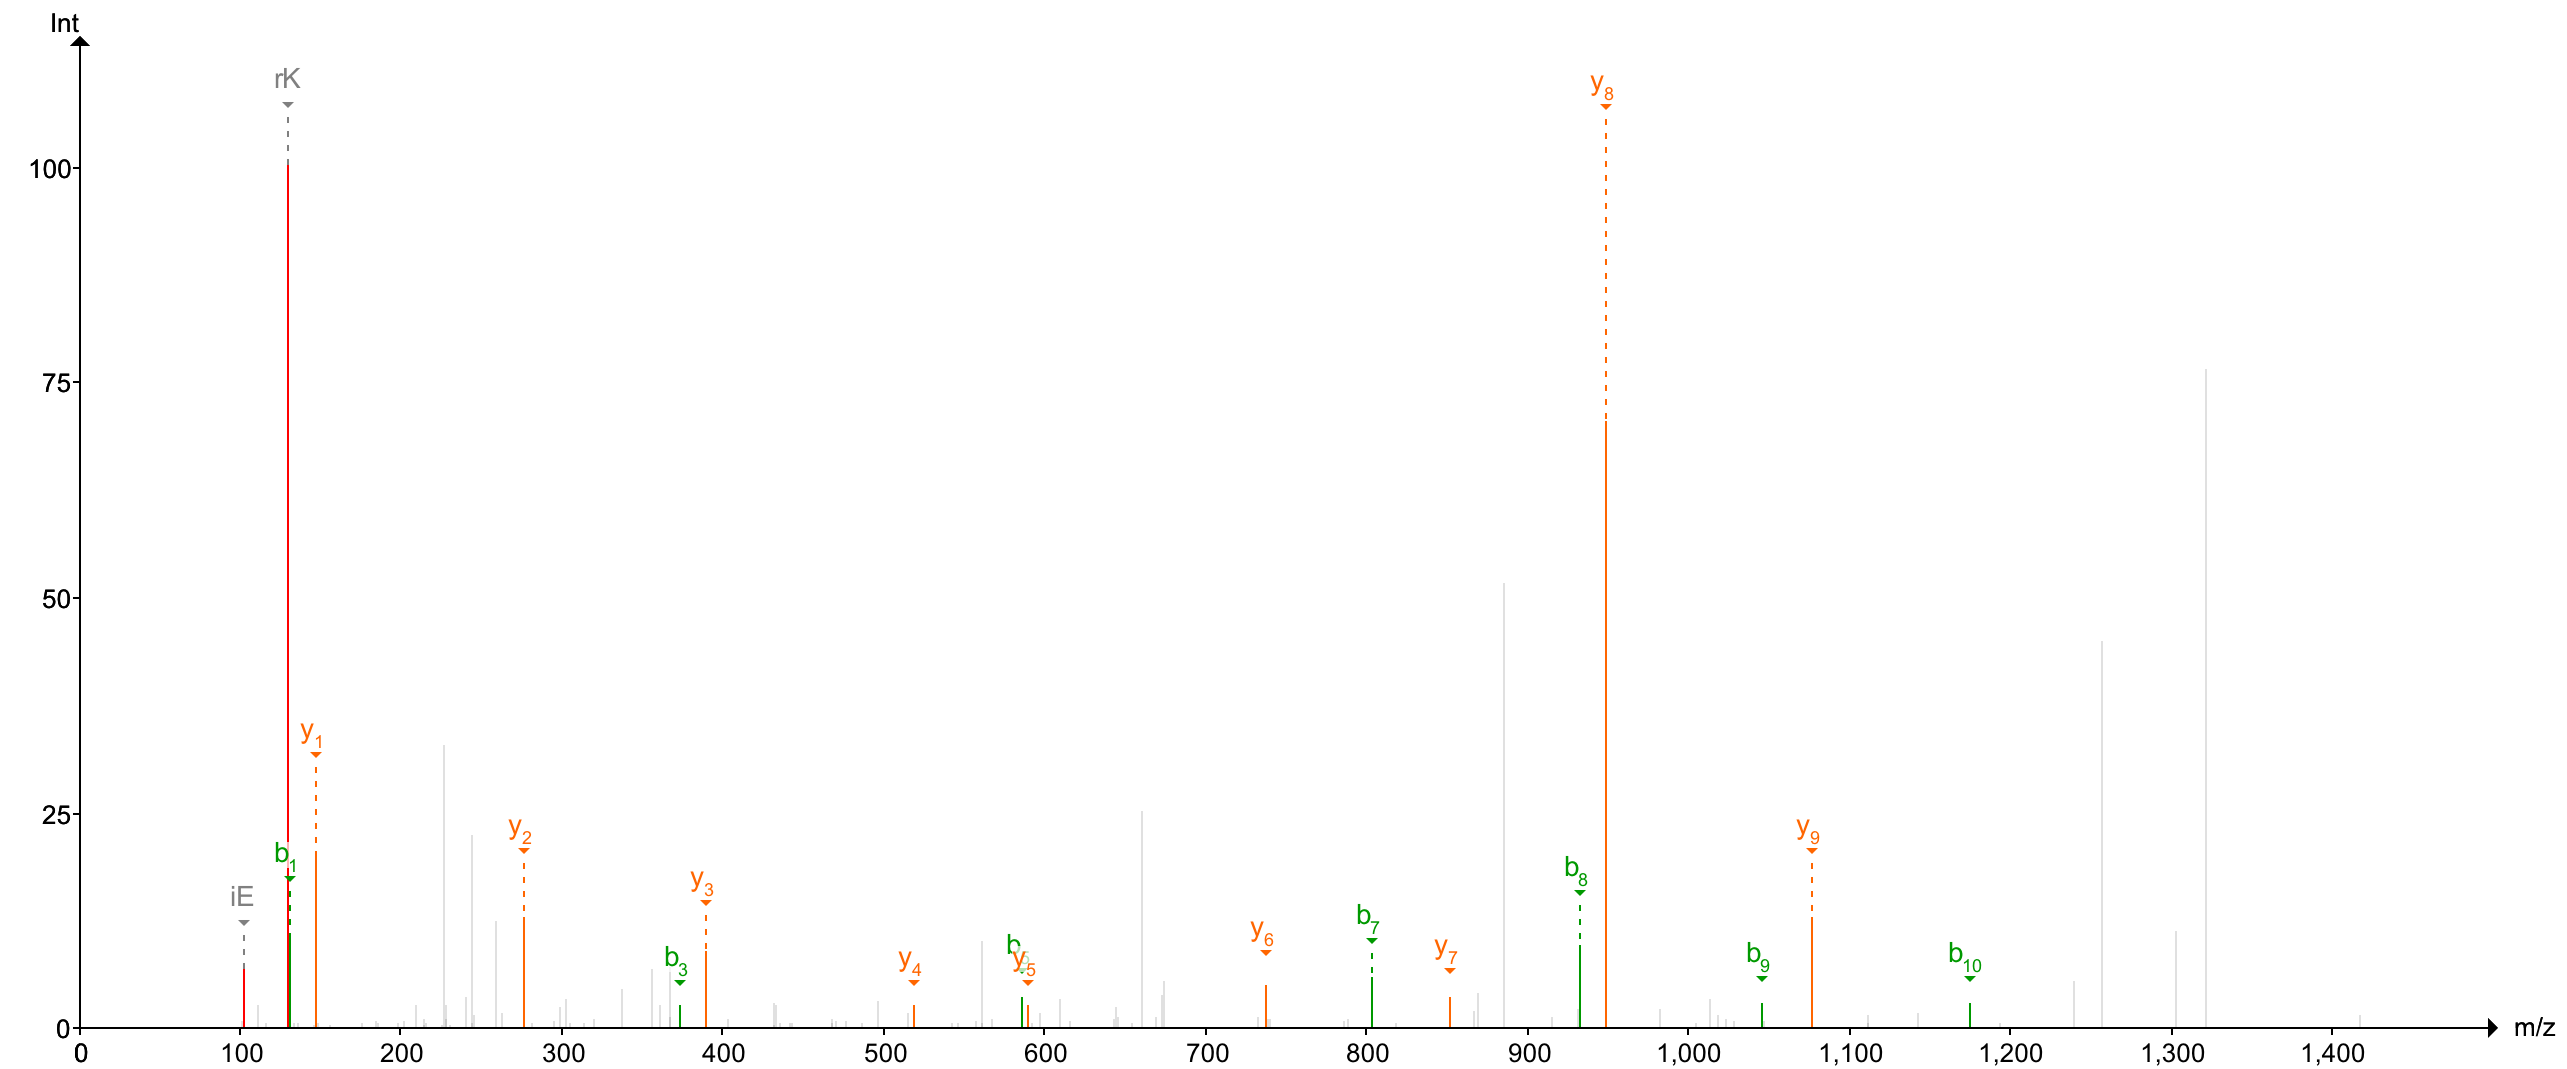

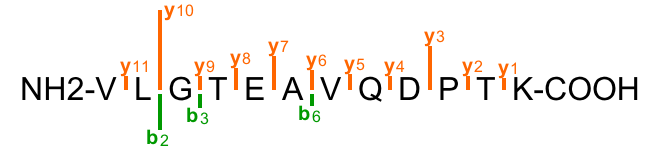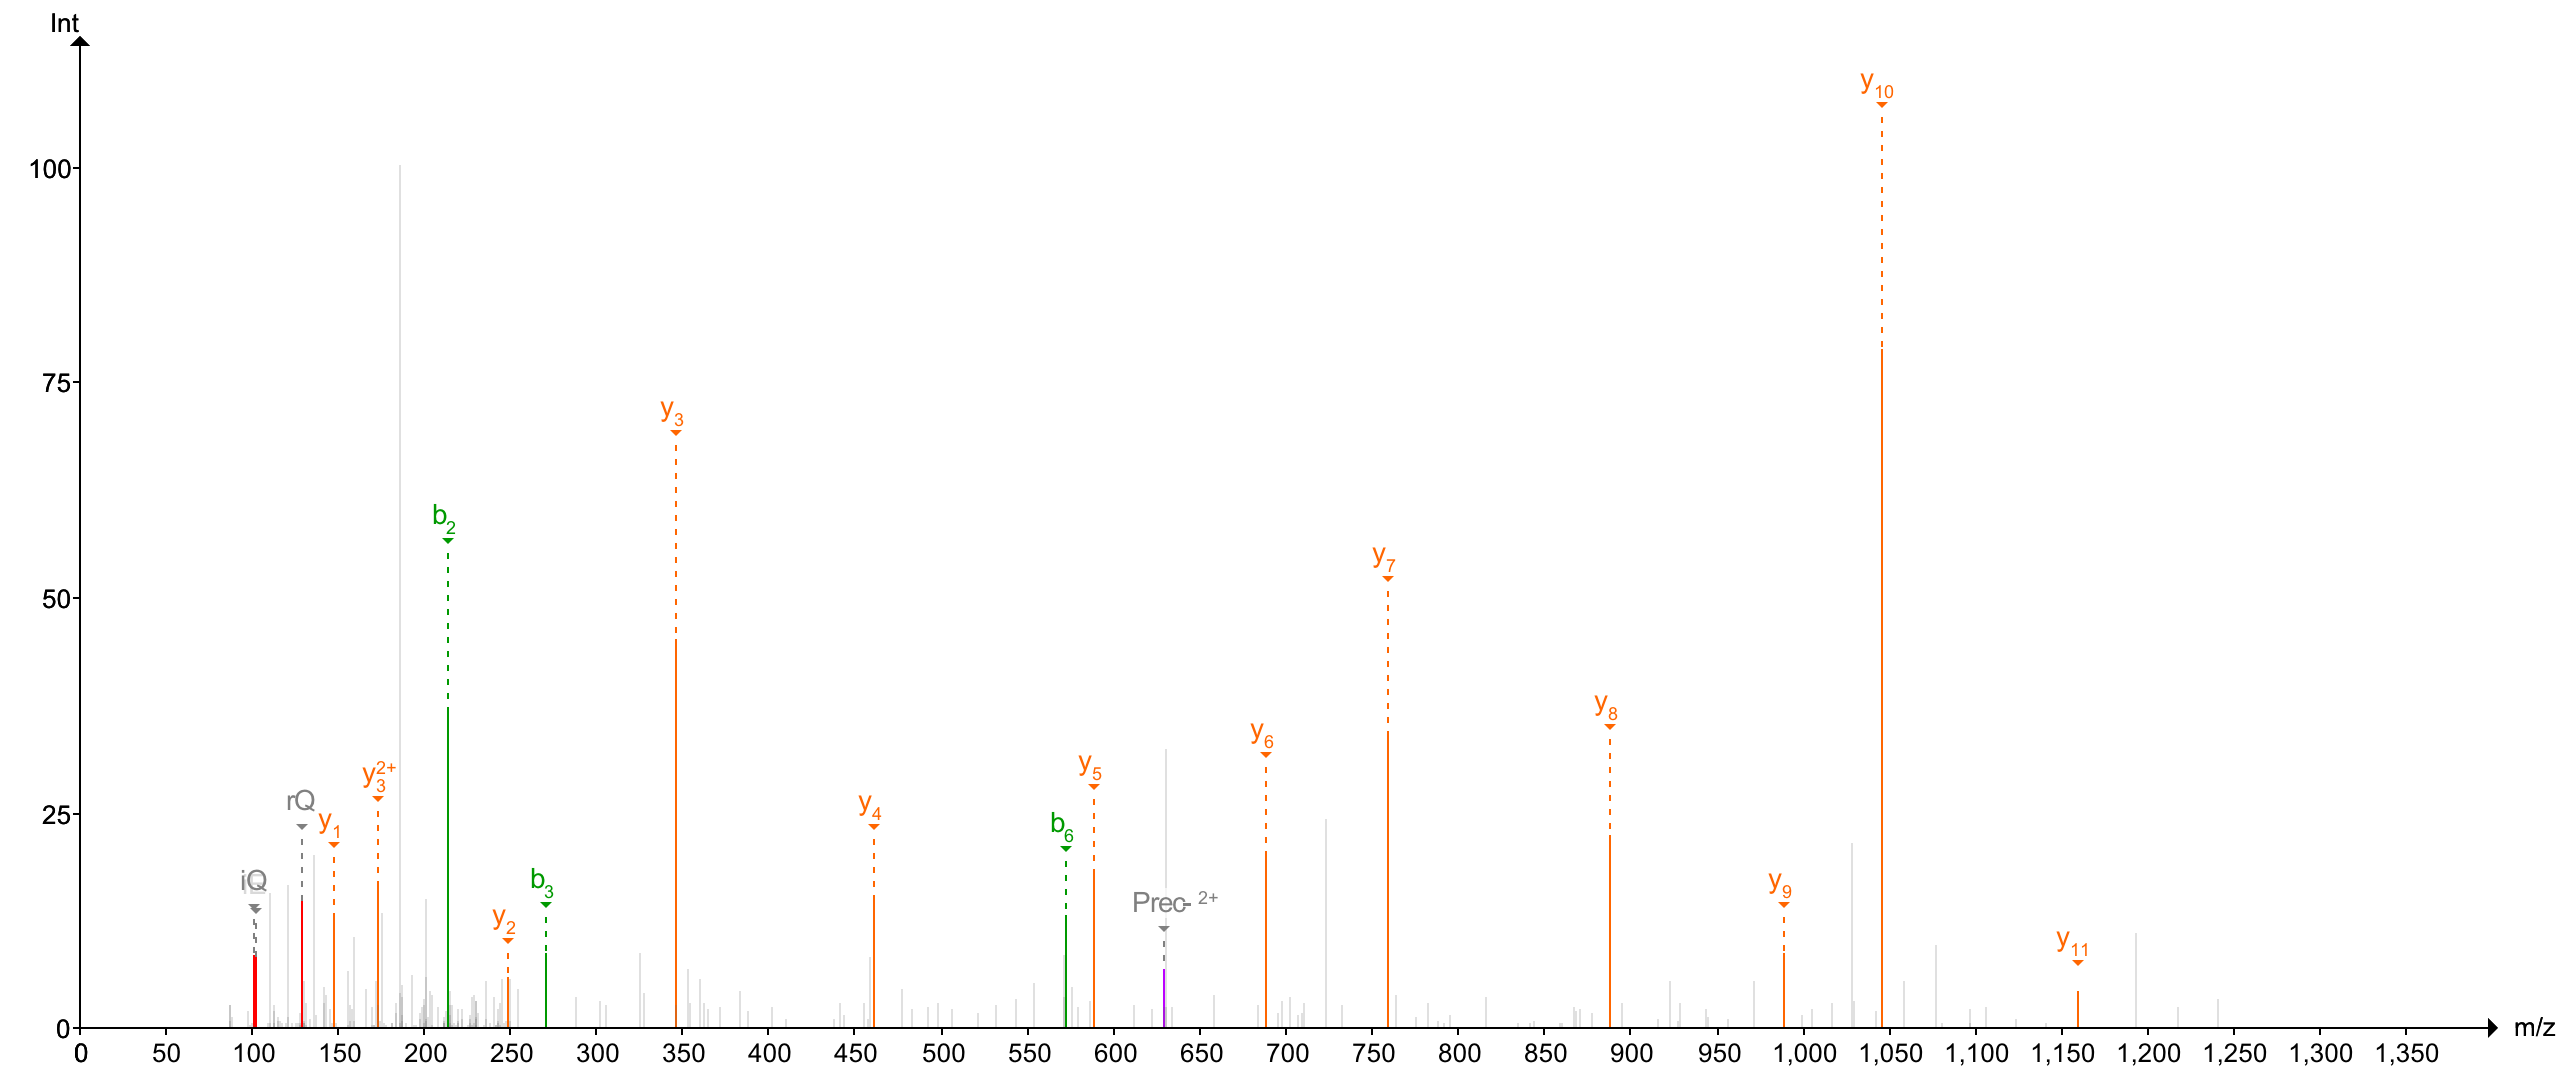

NH<sub>2</sub>-L D Q N V N E A M P S L K-COOH

b<sub>2</sub> b<sub>3</sub> b<sub>4</sub> b<sub>5</sub>

y<sub>1</sub> y<sub>2</sub> y<sub>3</sub> y<sub>4</sub> y<sub>5</sub> y<sub>6</sub> y<sub>7</sub> y<sub>8</sub> y<sub>9</sub> y<sub>10</sub>

M

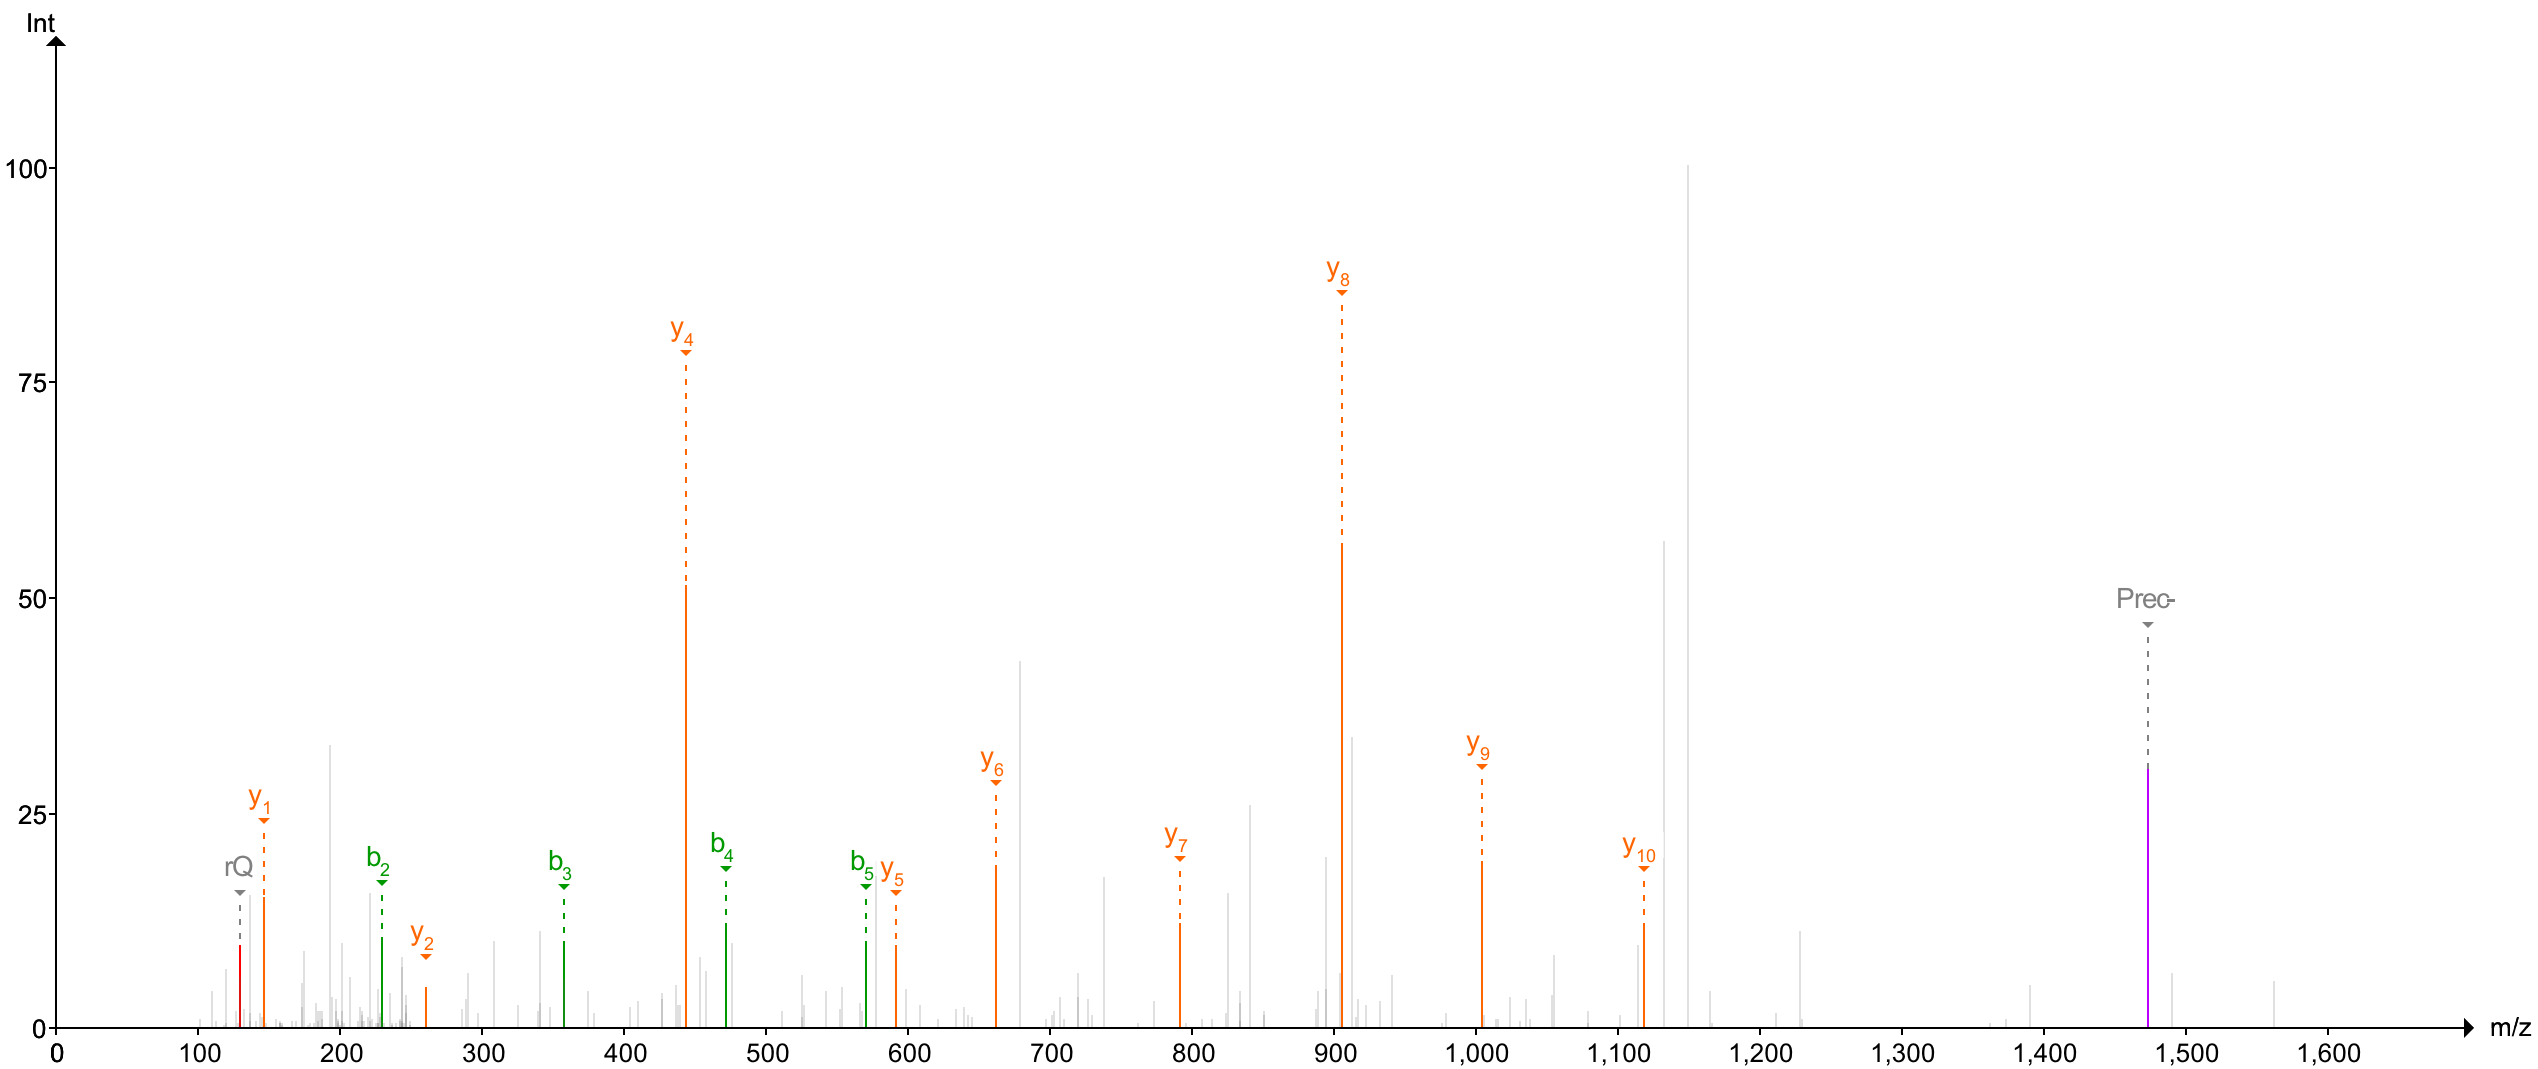

NH<sub>2</sub>-Y Q L Q S Q E N F E A F M K-COOH

b<sub>3</sub> b<sub>4</sub> b<sub>5</sub> b<sub>6</sub>

y<sub>1</sub> y<sub>2</sub> y<sub>3</sub>

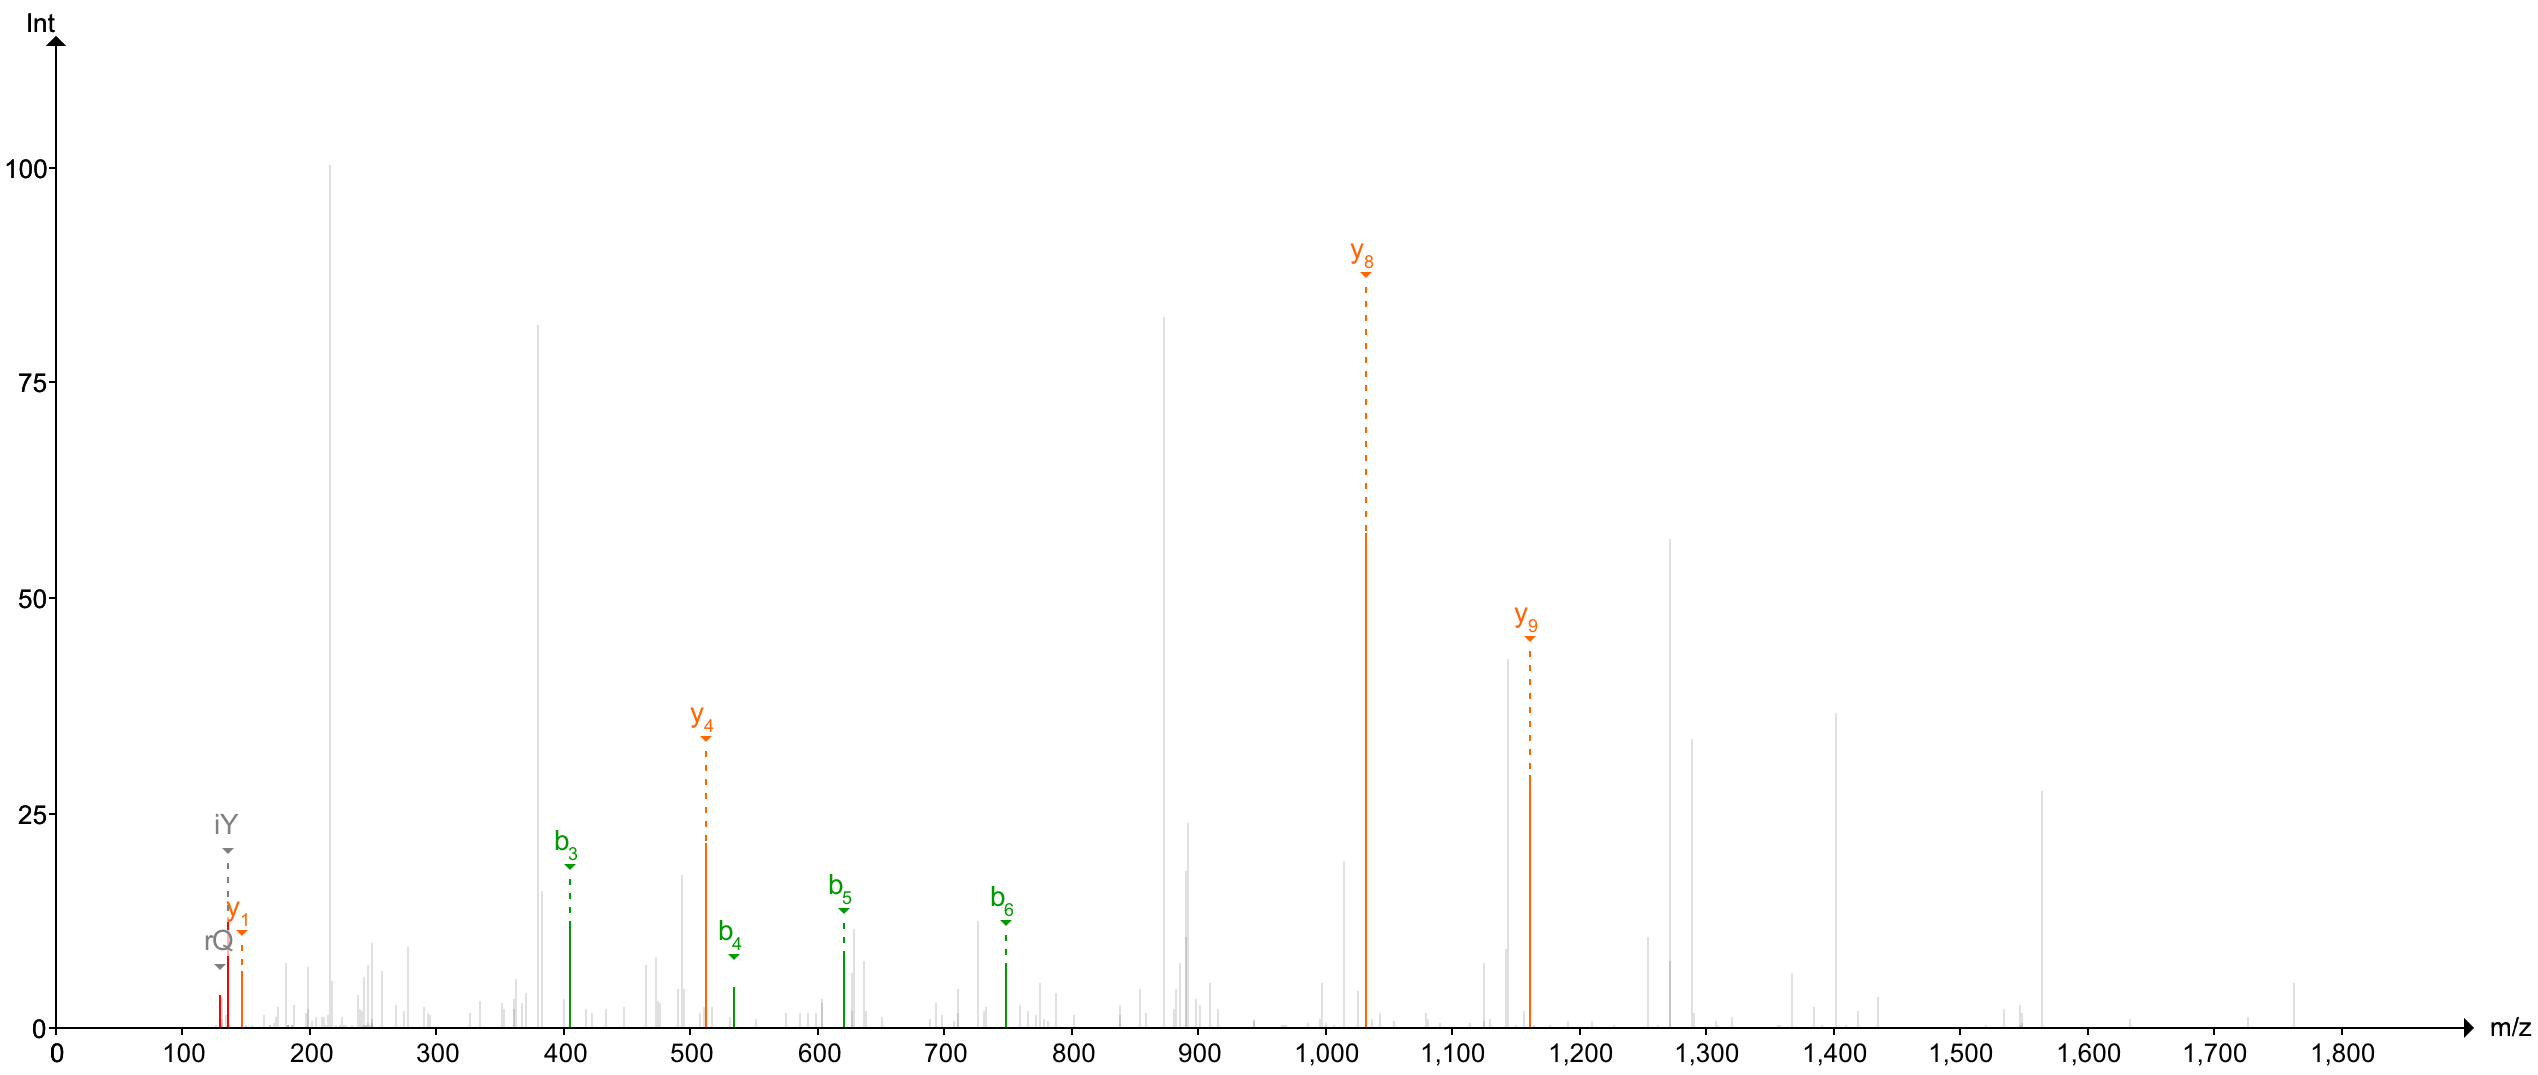



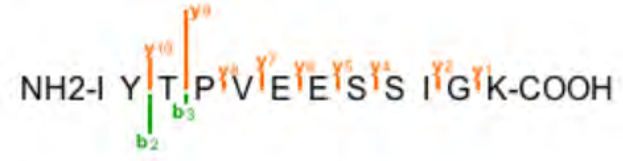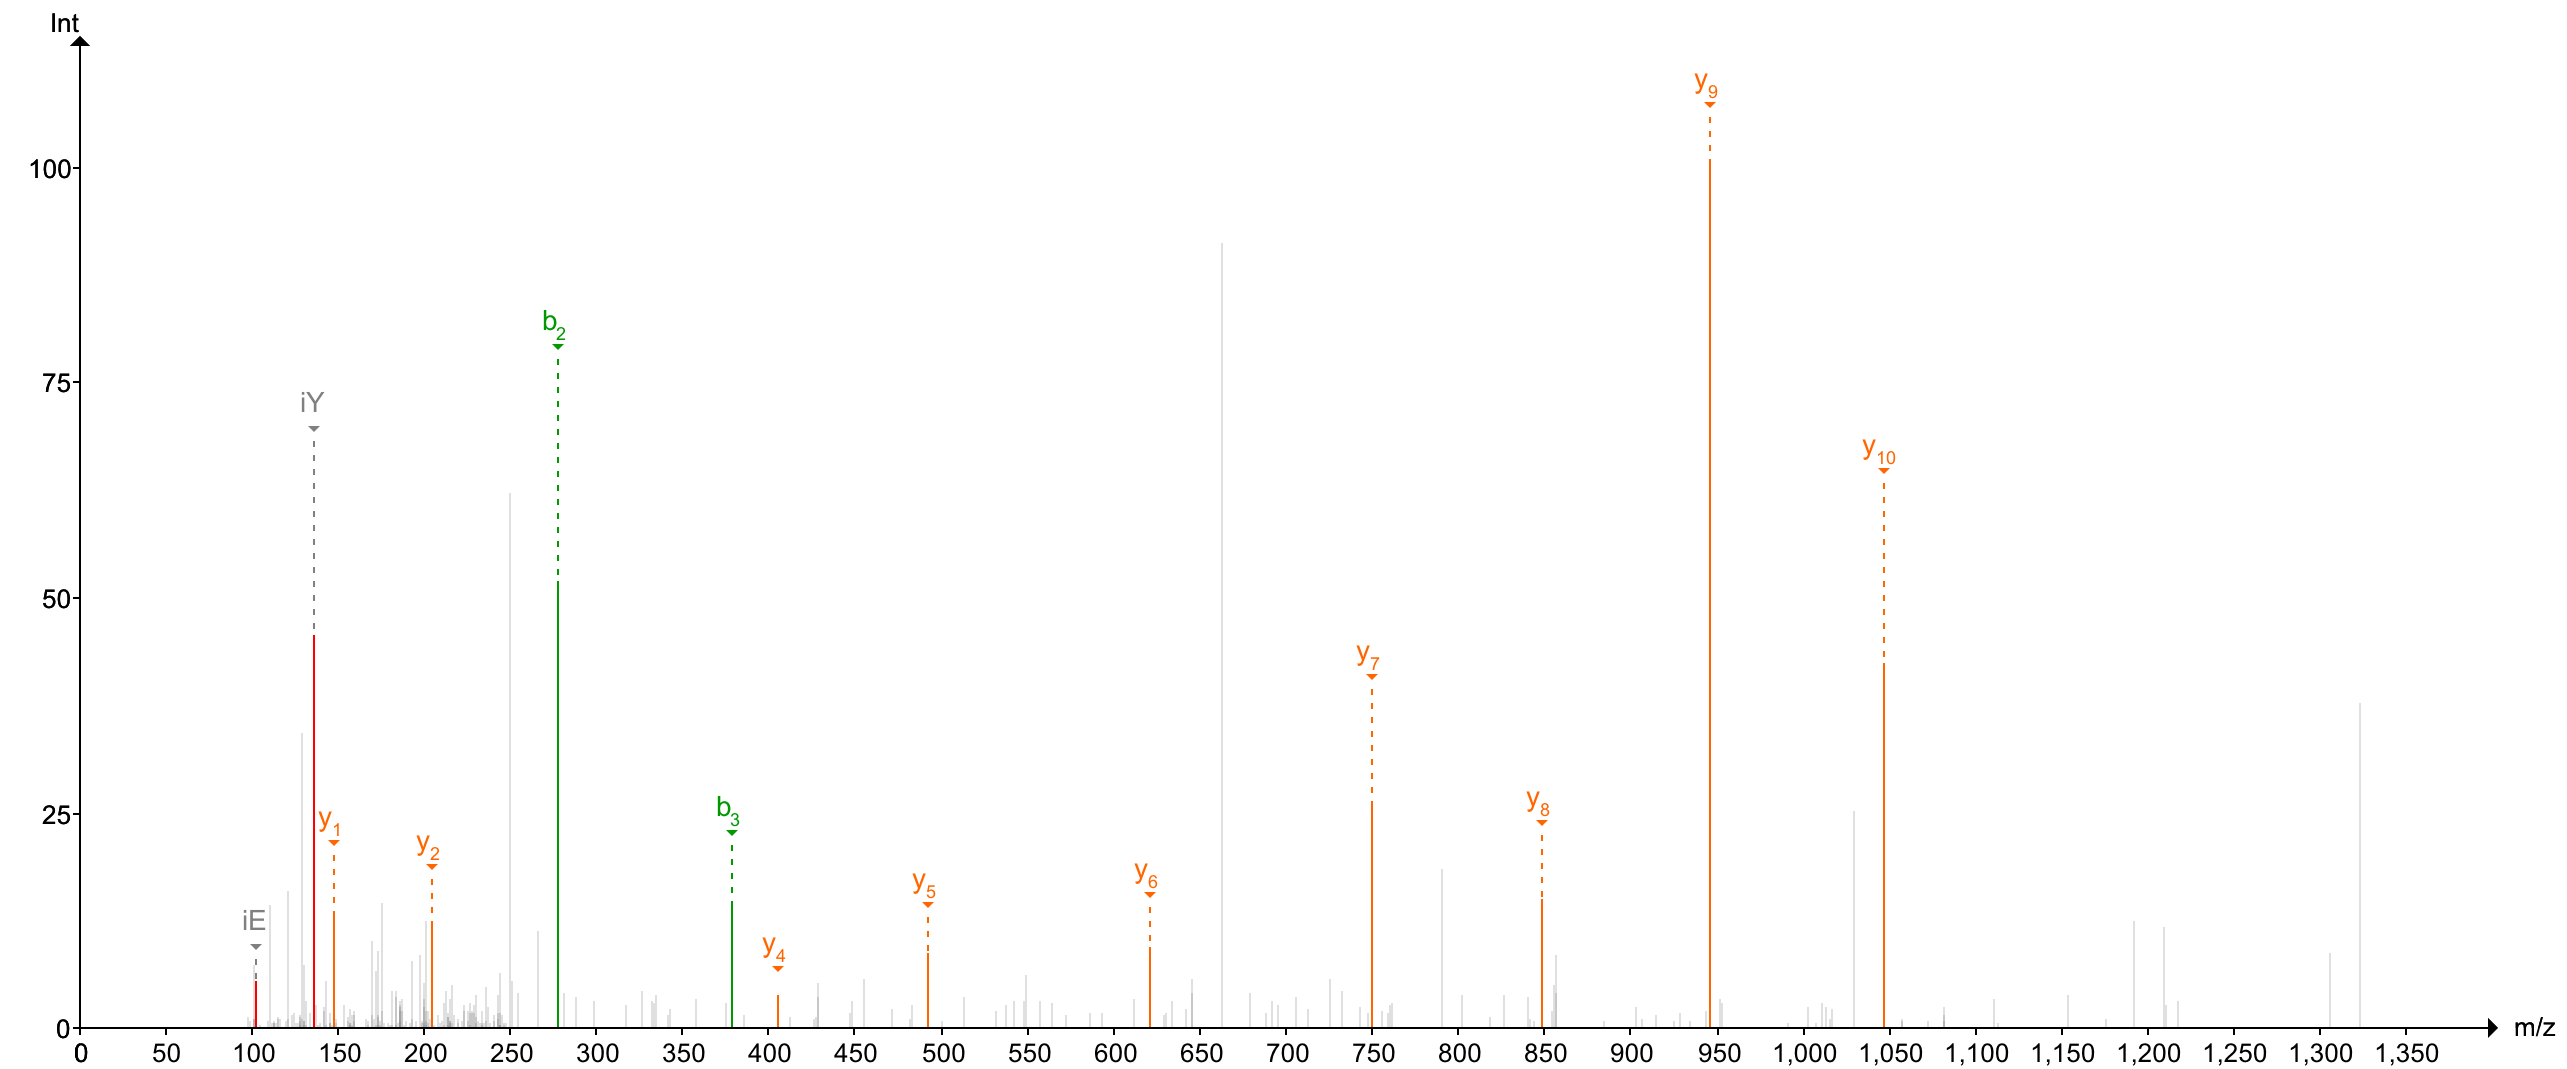

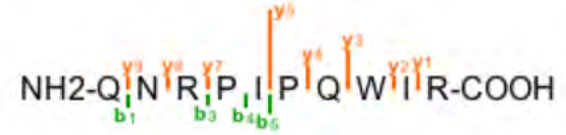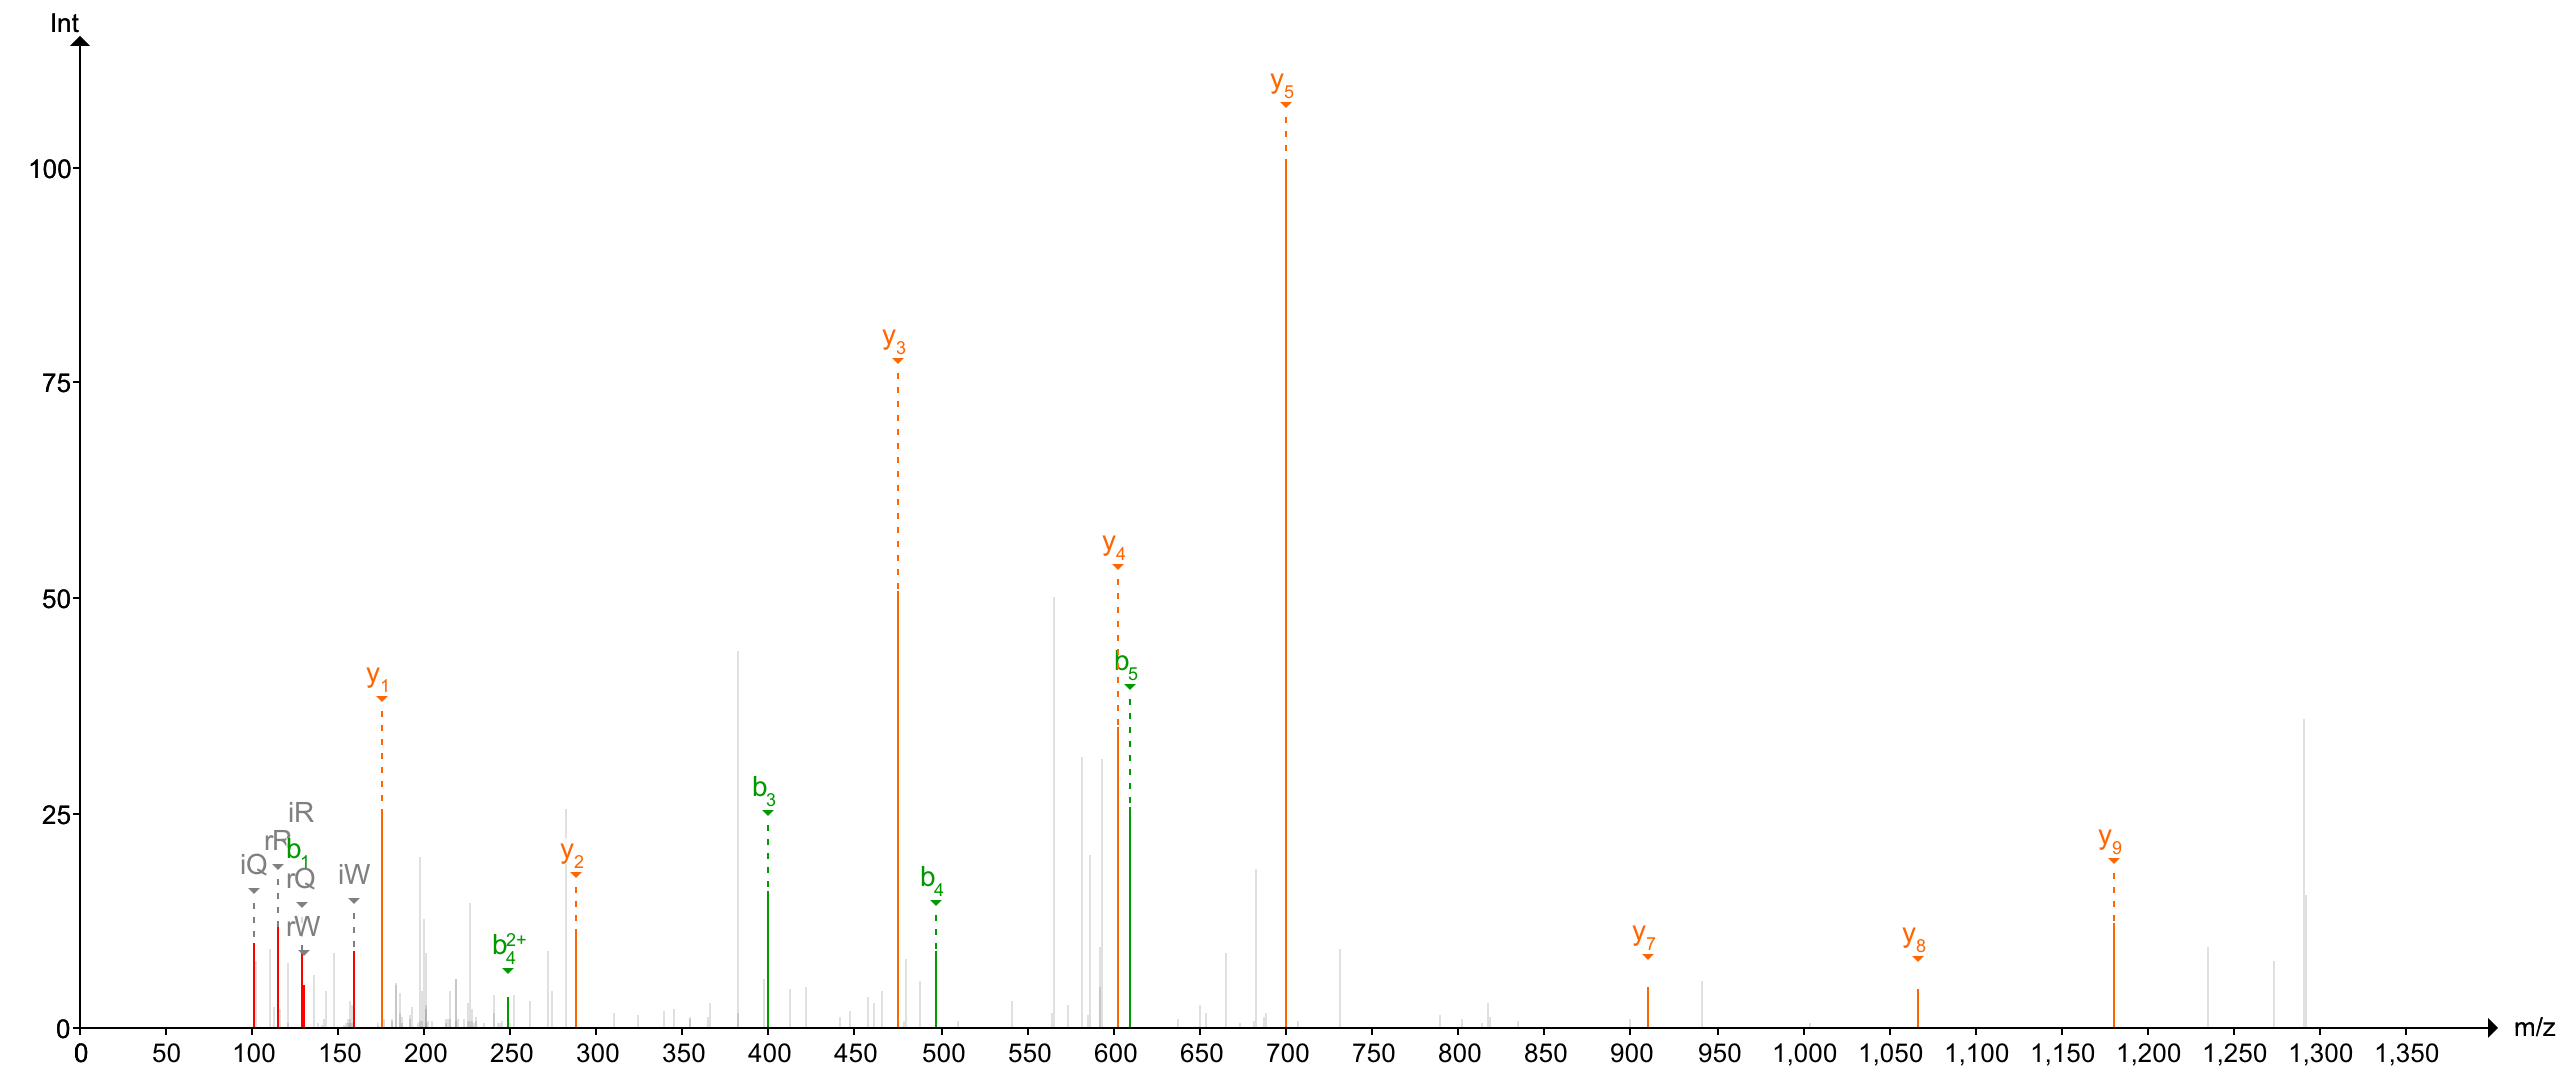

NH<sub>2</sub>-Q H Q P T D **M** V **M** E N L K <sup>Y<sub>4</sub></sup> <sup>Y<sub>2</sub></sup> <sup>Y<sub>1</sub></sup> K-COOH

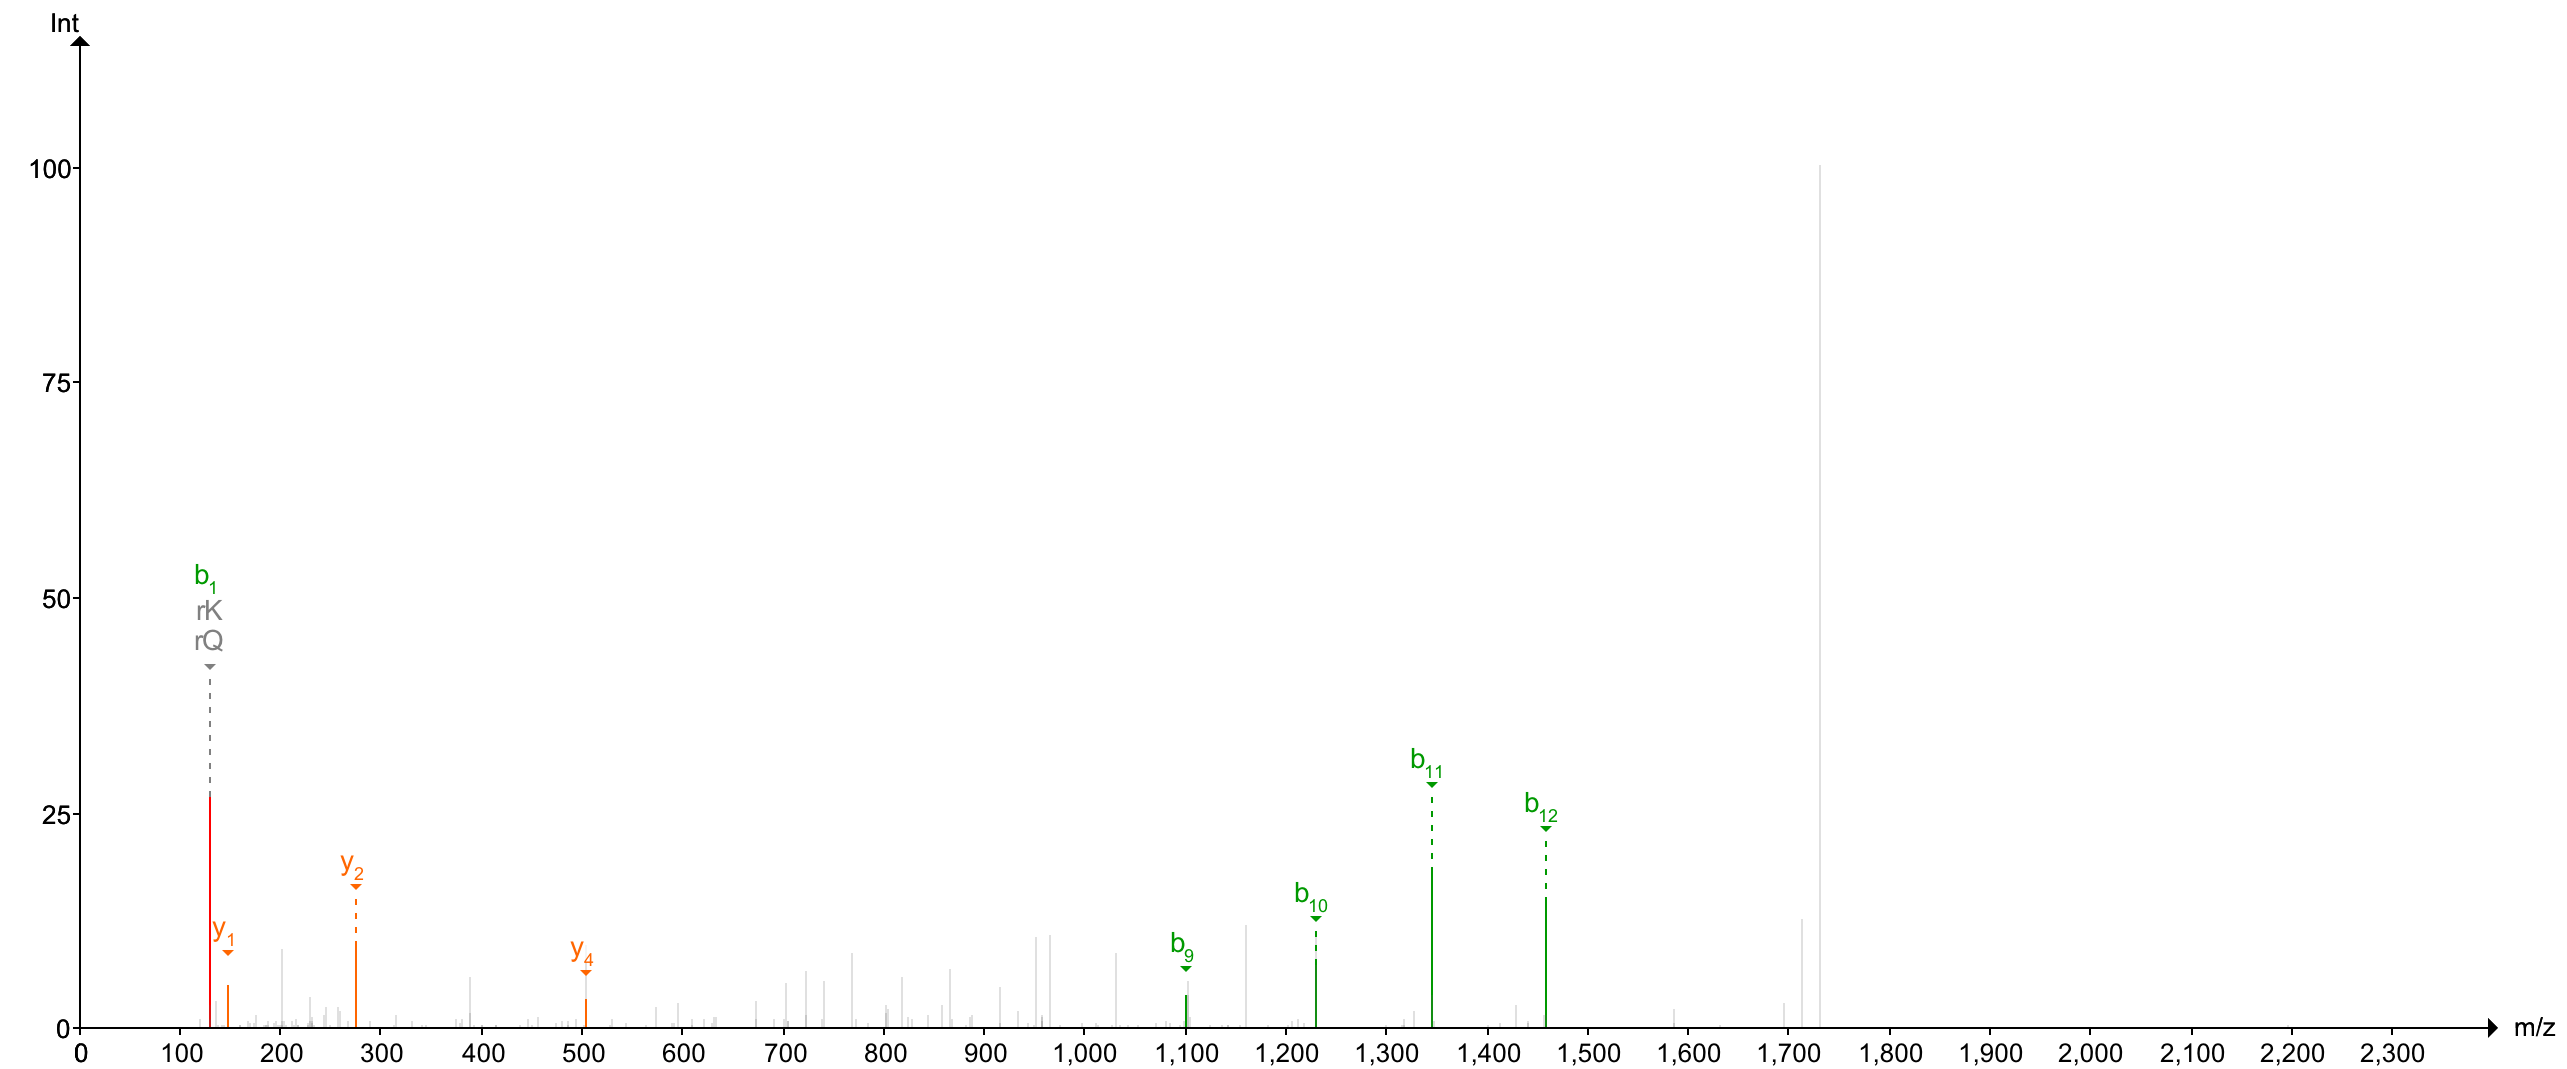

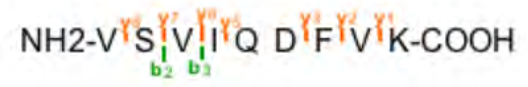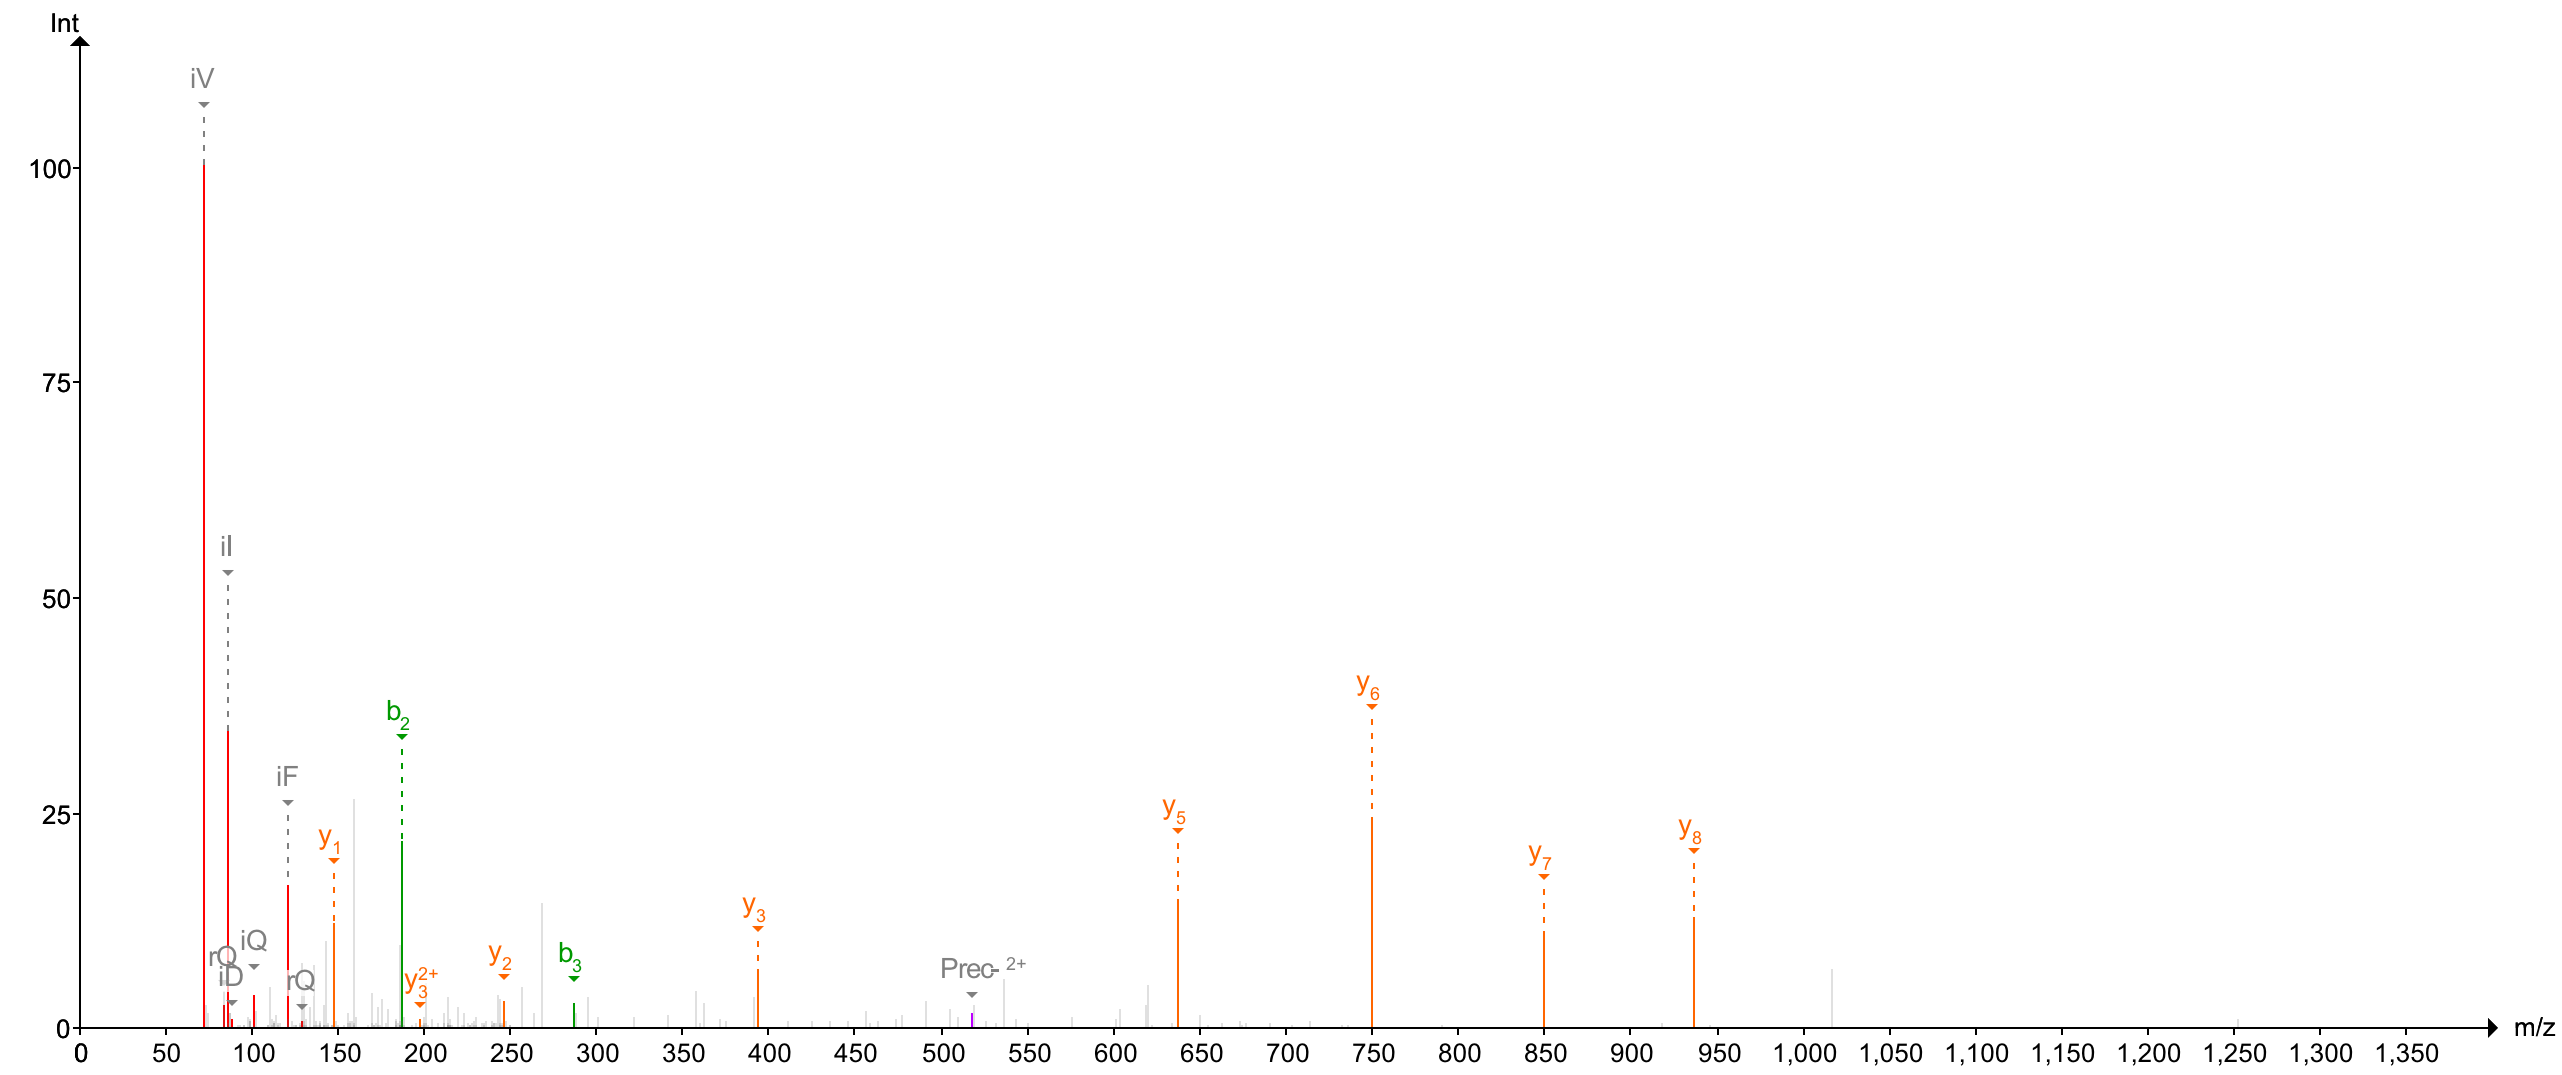

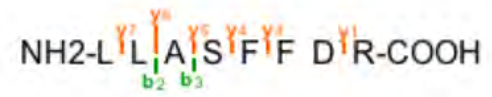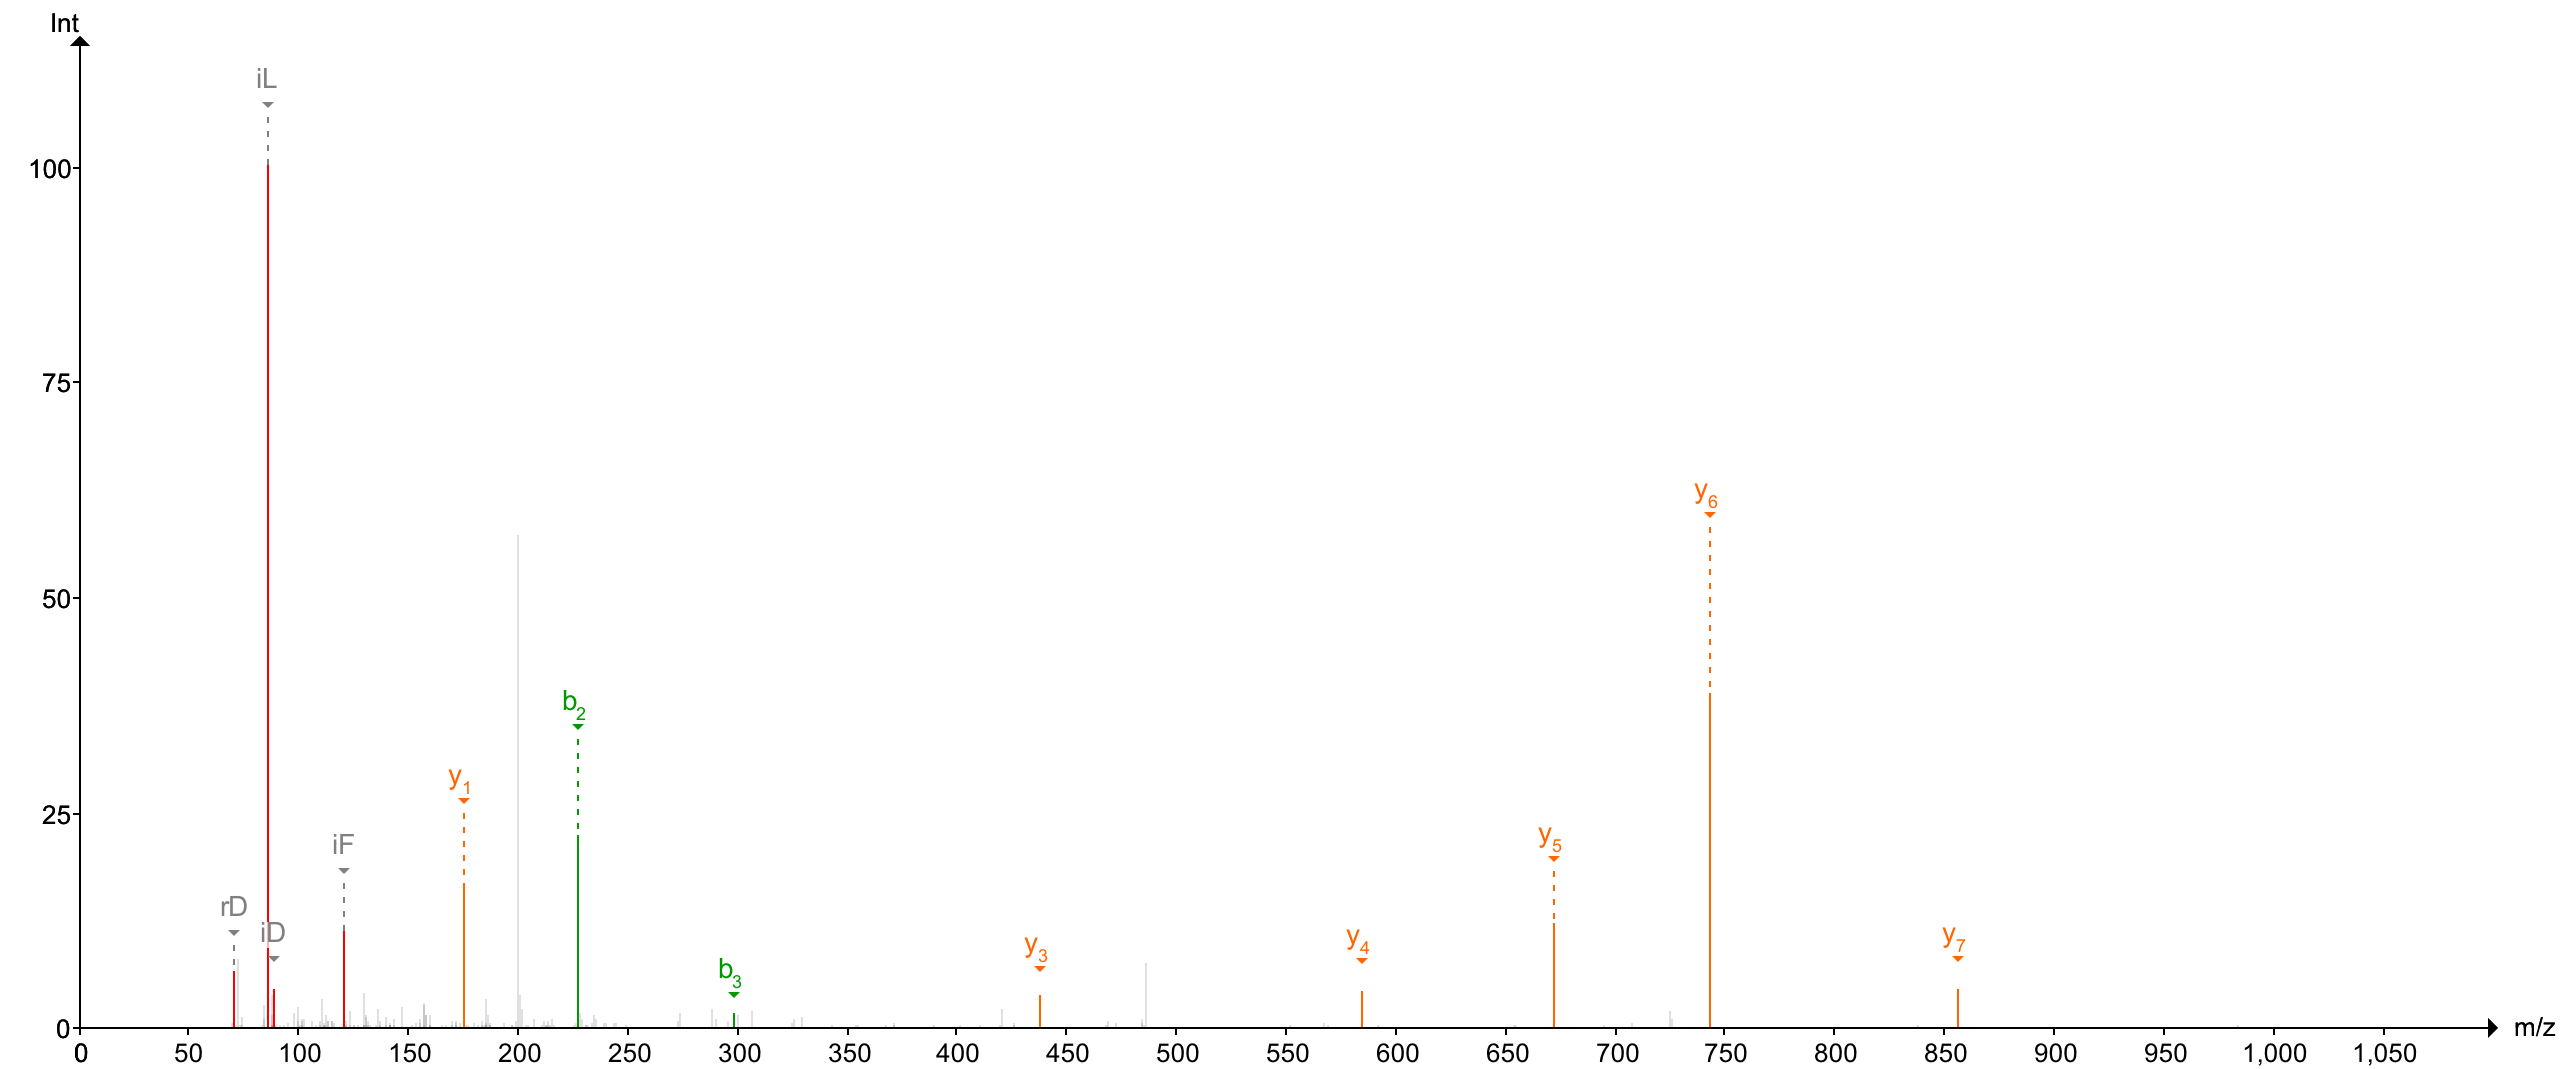

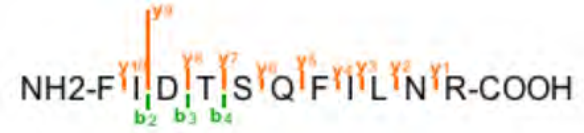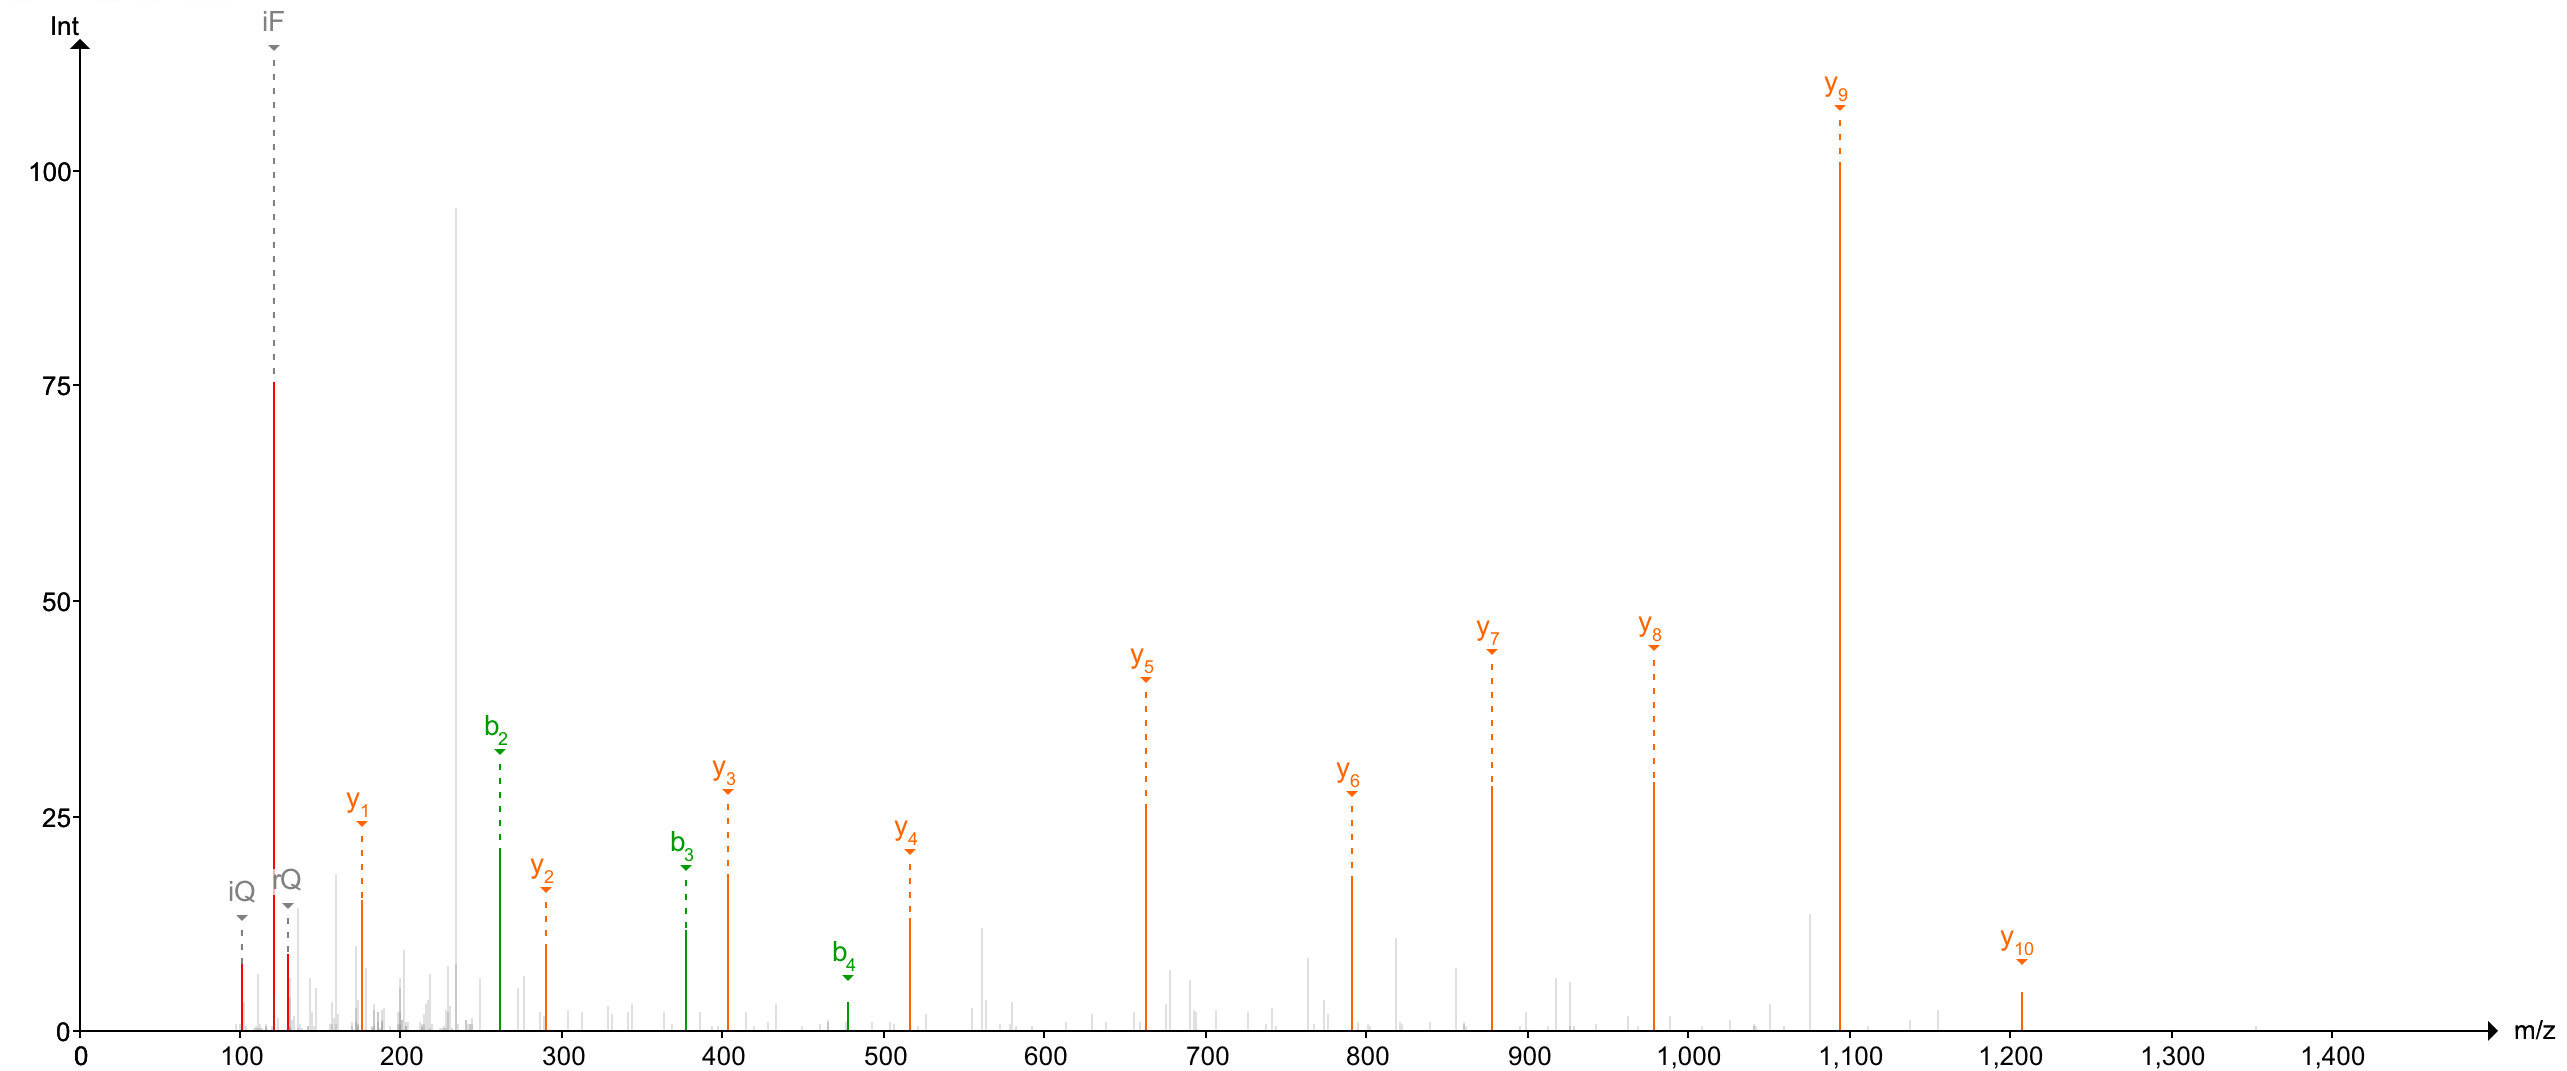

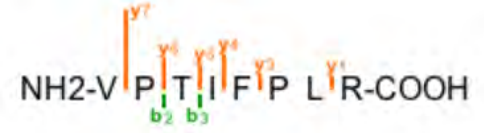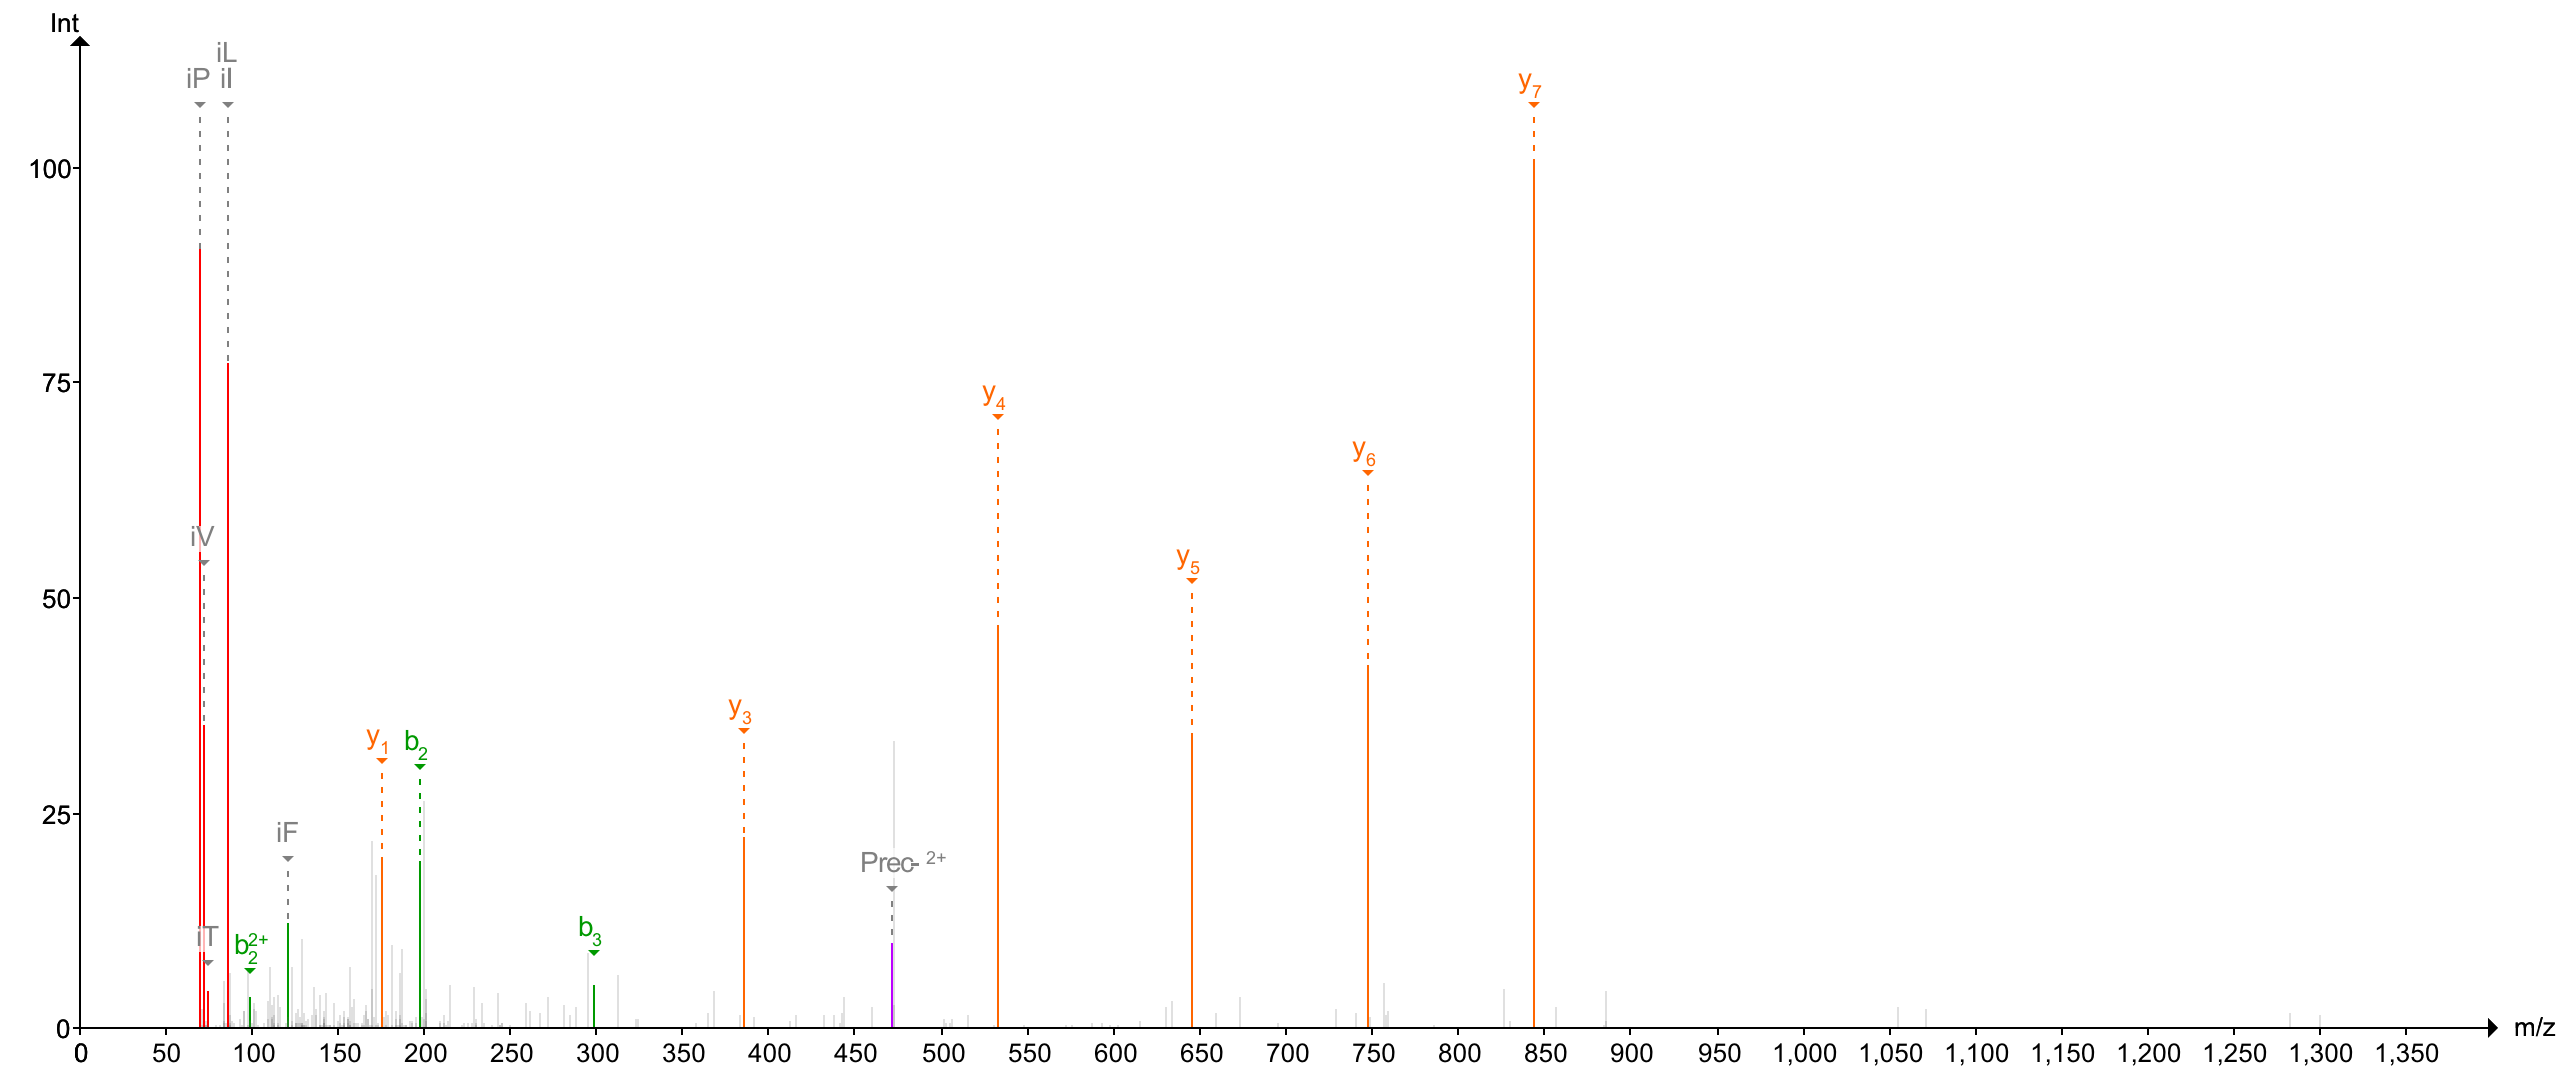

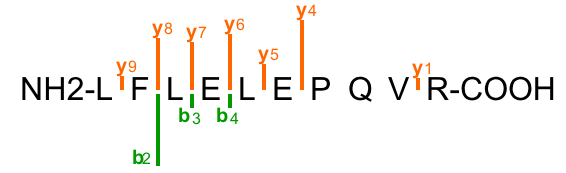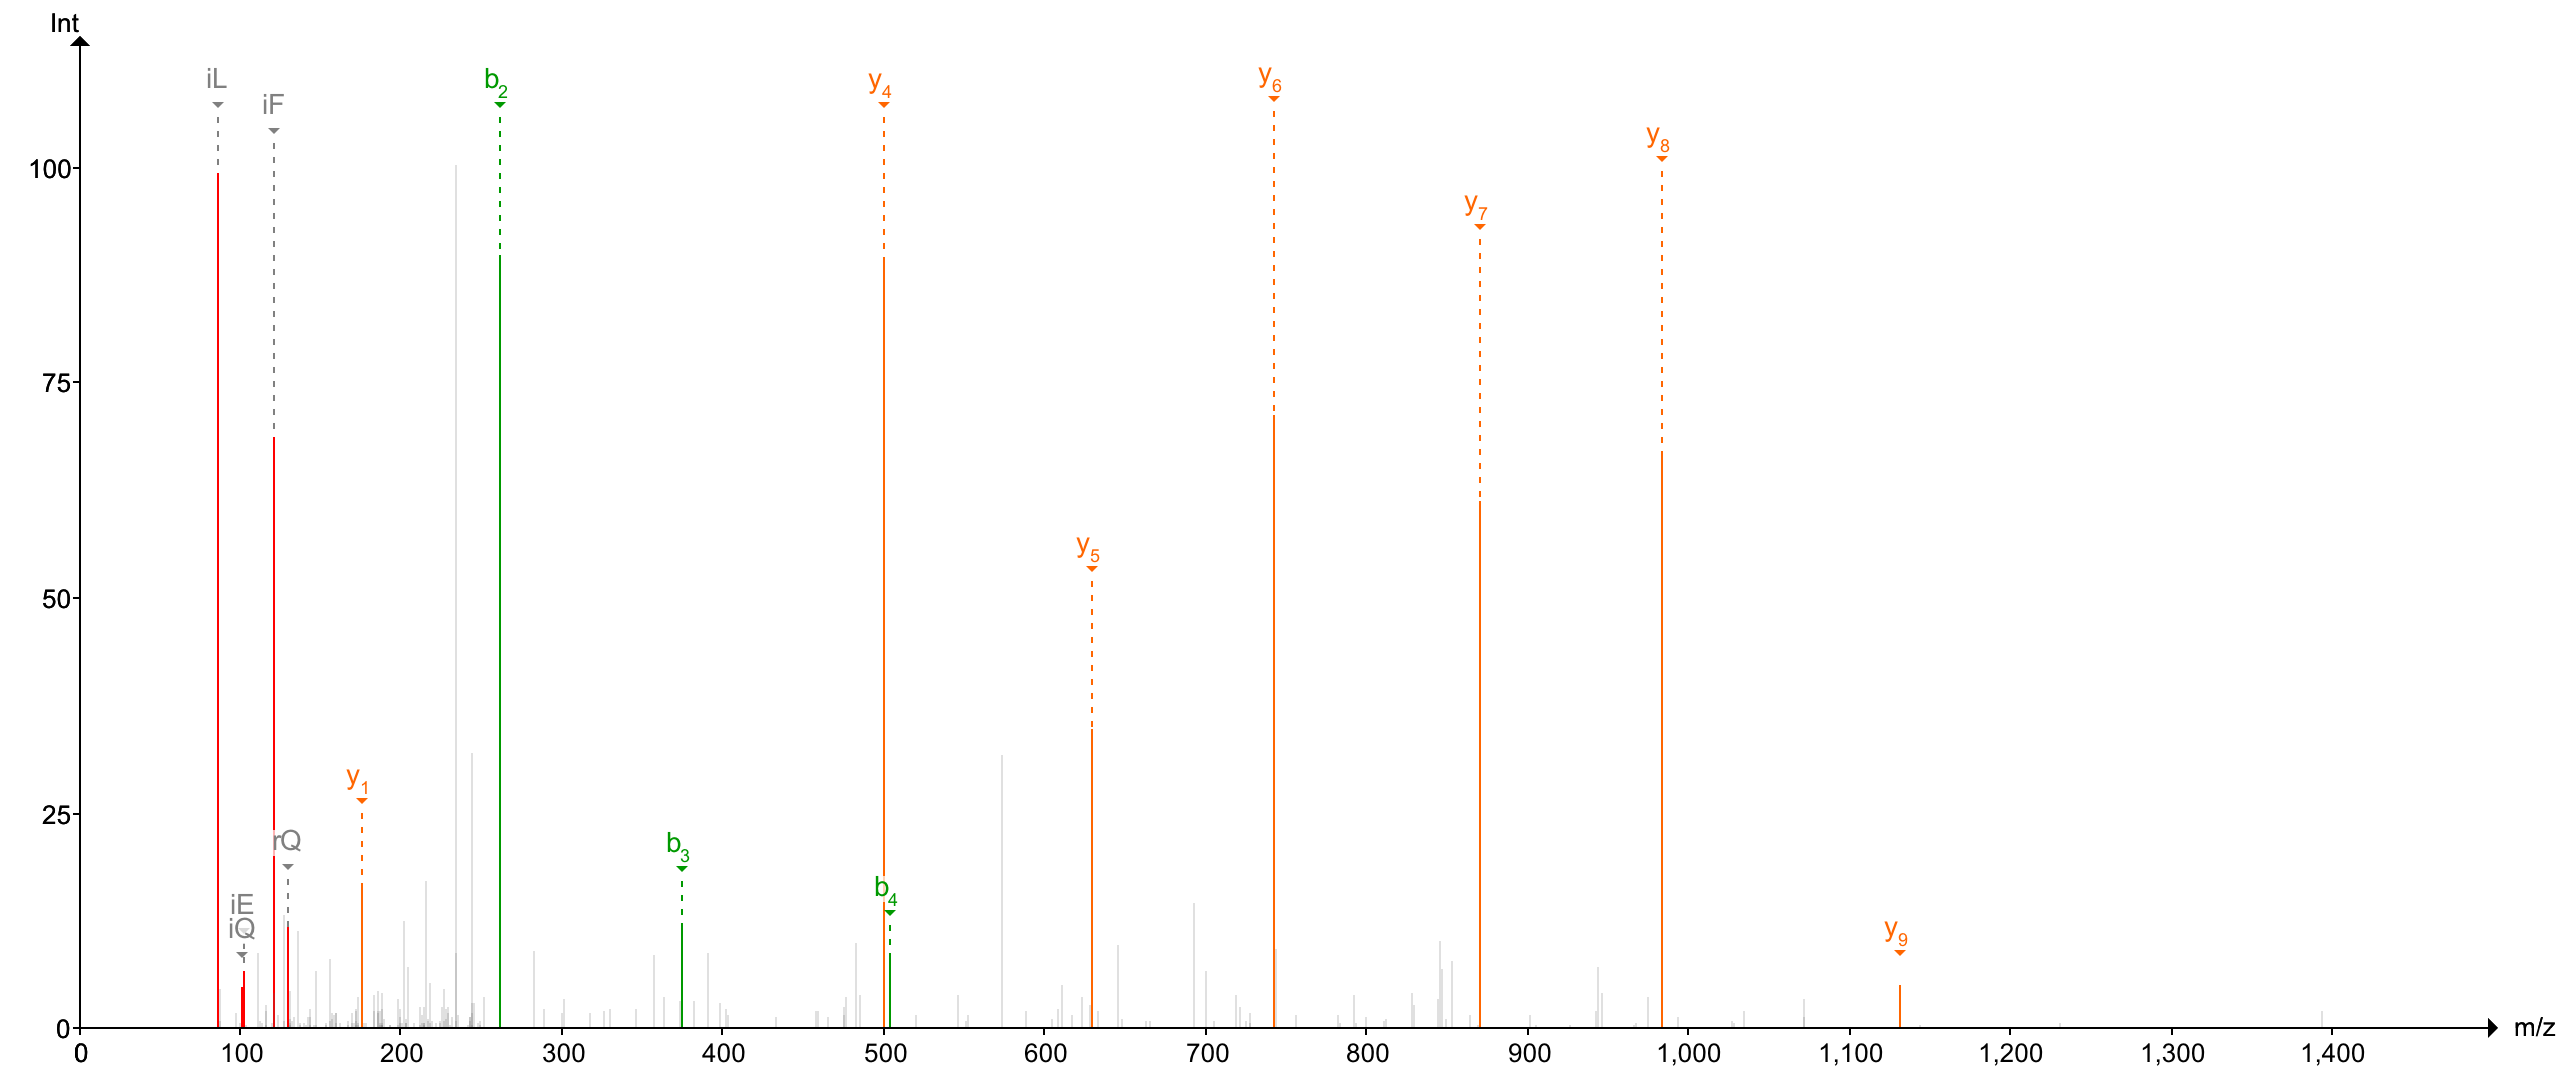



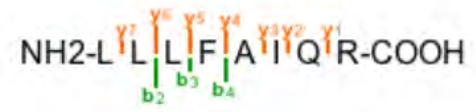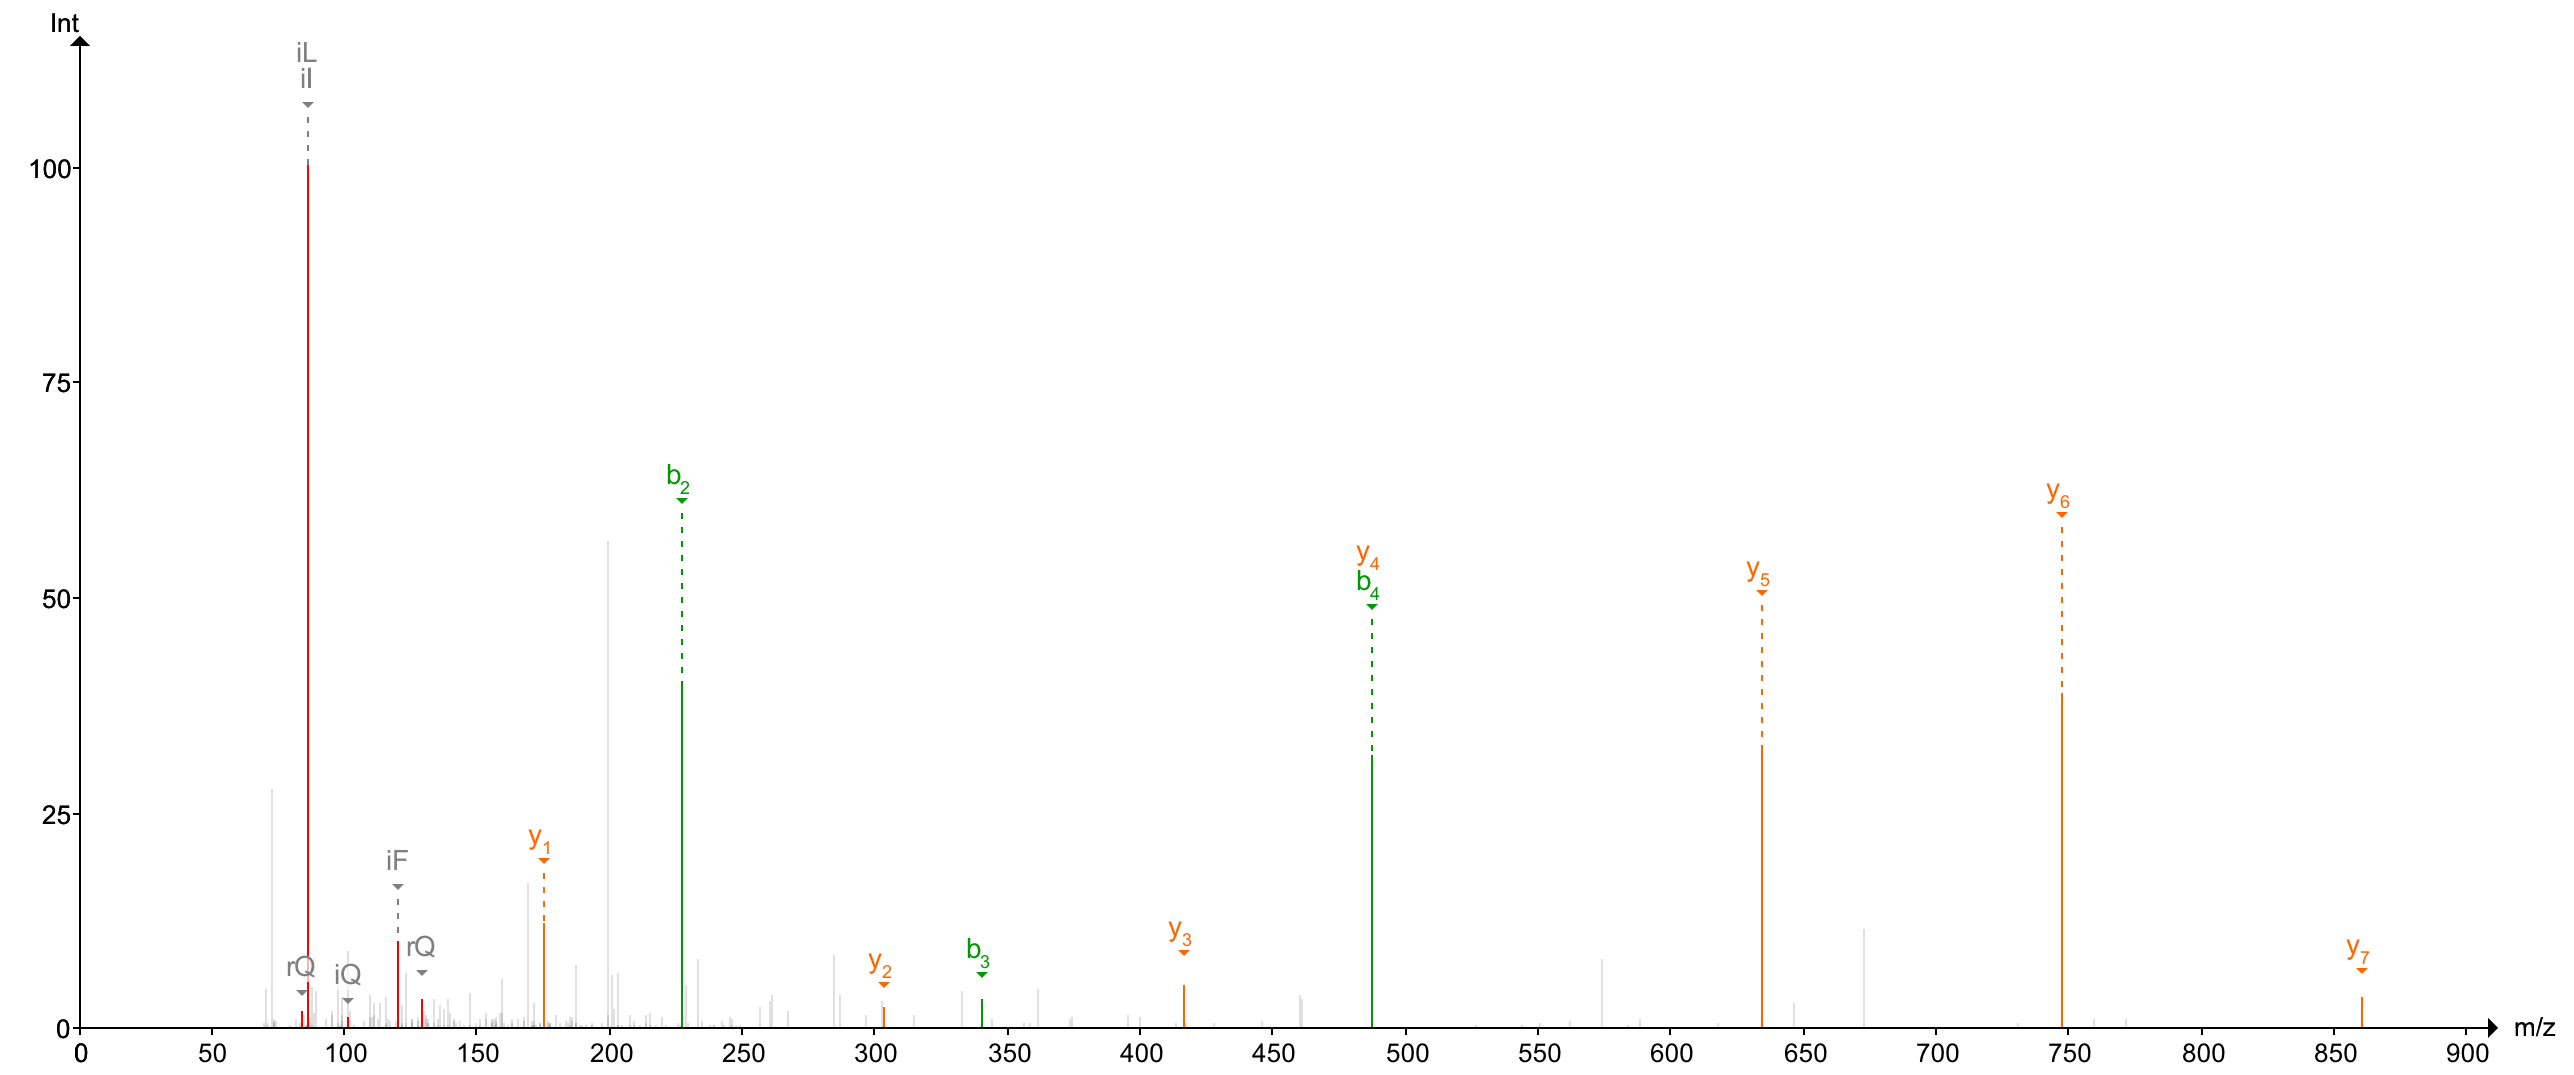

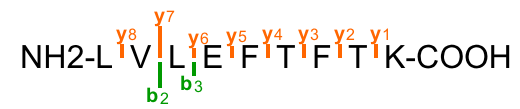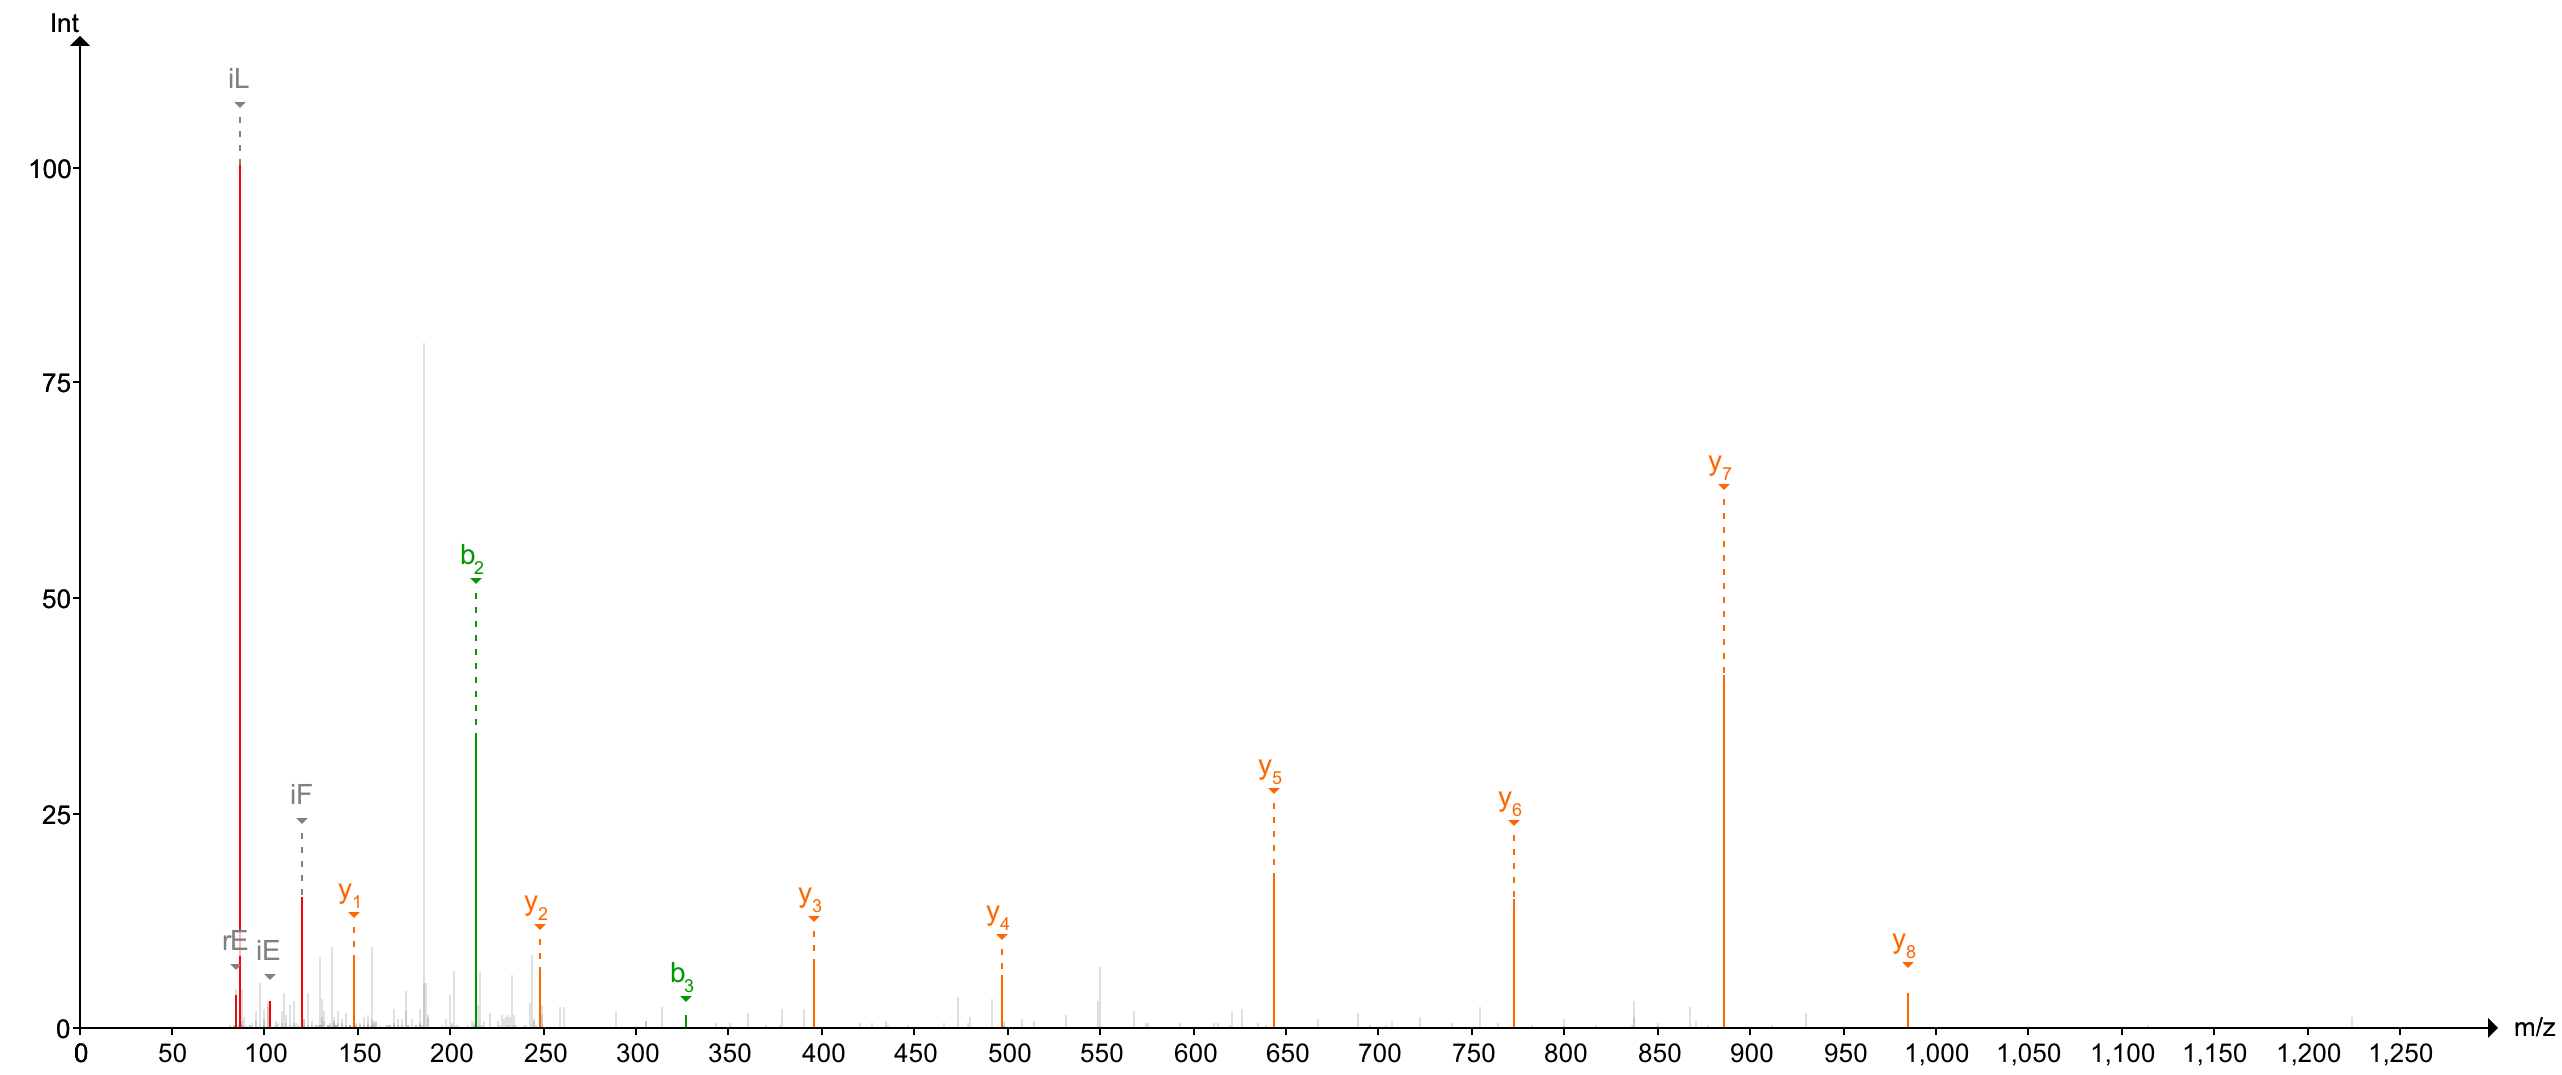

NH<sub>2</sub>-Y<sup>y<sub>9</sub></sup>N<sup>y<sub>8</sub></sup>I<sup>y<sub>7</sub></sup>Y<sup>y<sub>6</sub></sup>S<sup>y<sub>5</sub></sup>P<sup>y<sub>3</sub></sup>L<sup>y<sub>2</sub></sup>L<sup>y<sub>1</sub></sup>F<sup>y<sub>1</sub></sup>K-COOH

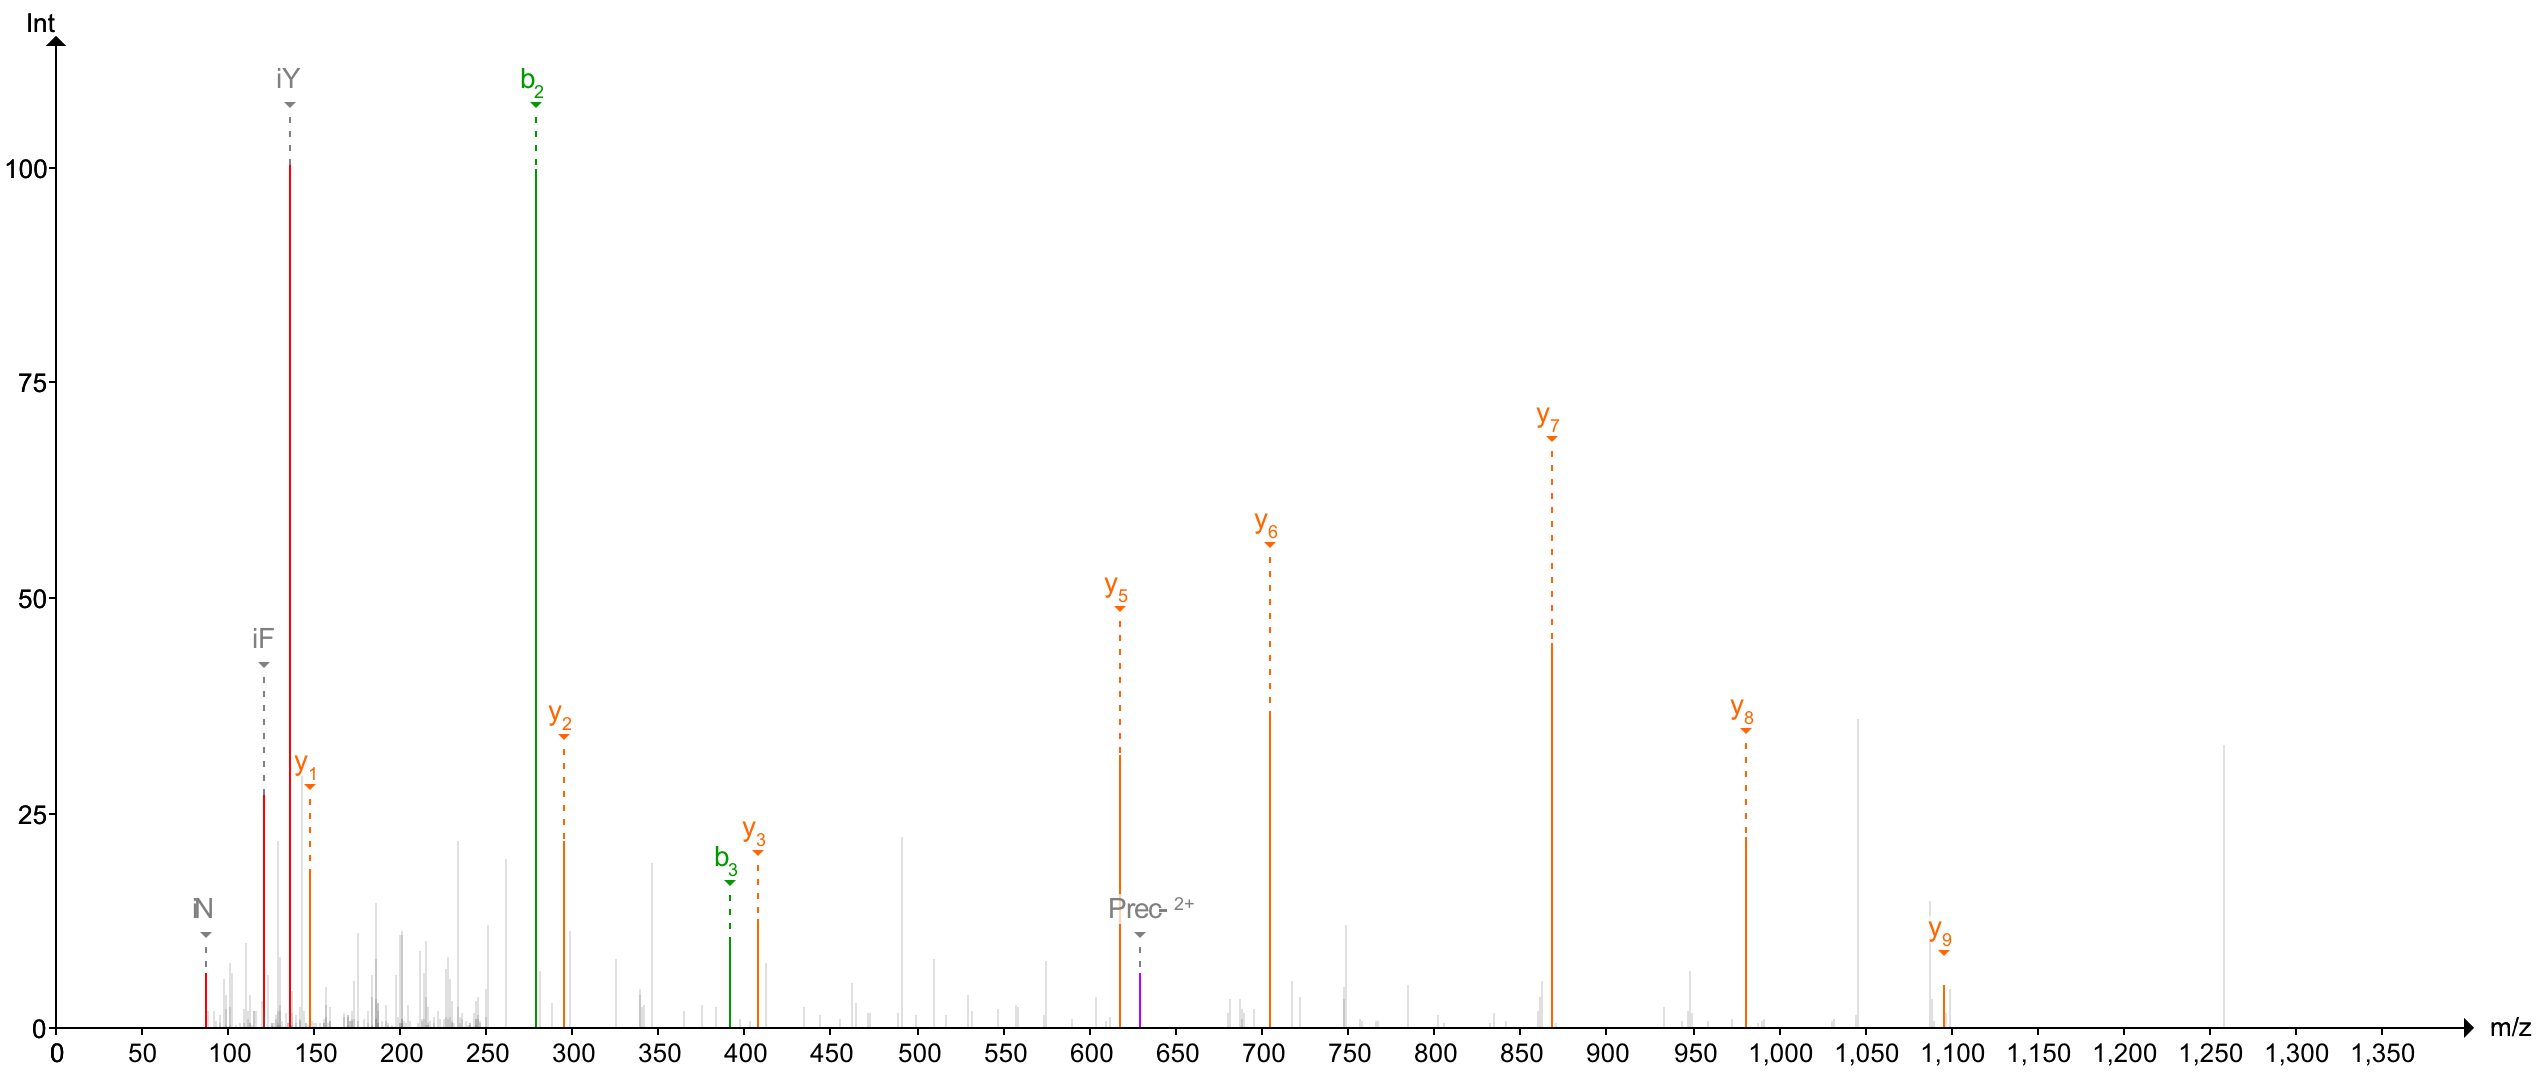

NH<sub>2</sub>-I A<sub>1</sub> A<sub>2</sub> L<sub>1</sub> N<sub>1</sub> A<sub>1</sub> L A A A C N<sub>1</sub> Y L P Q S R-COOH

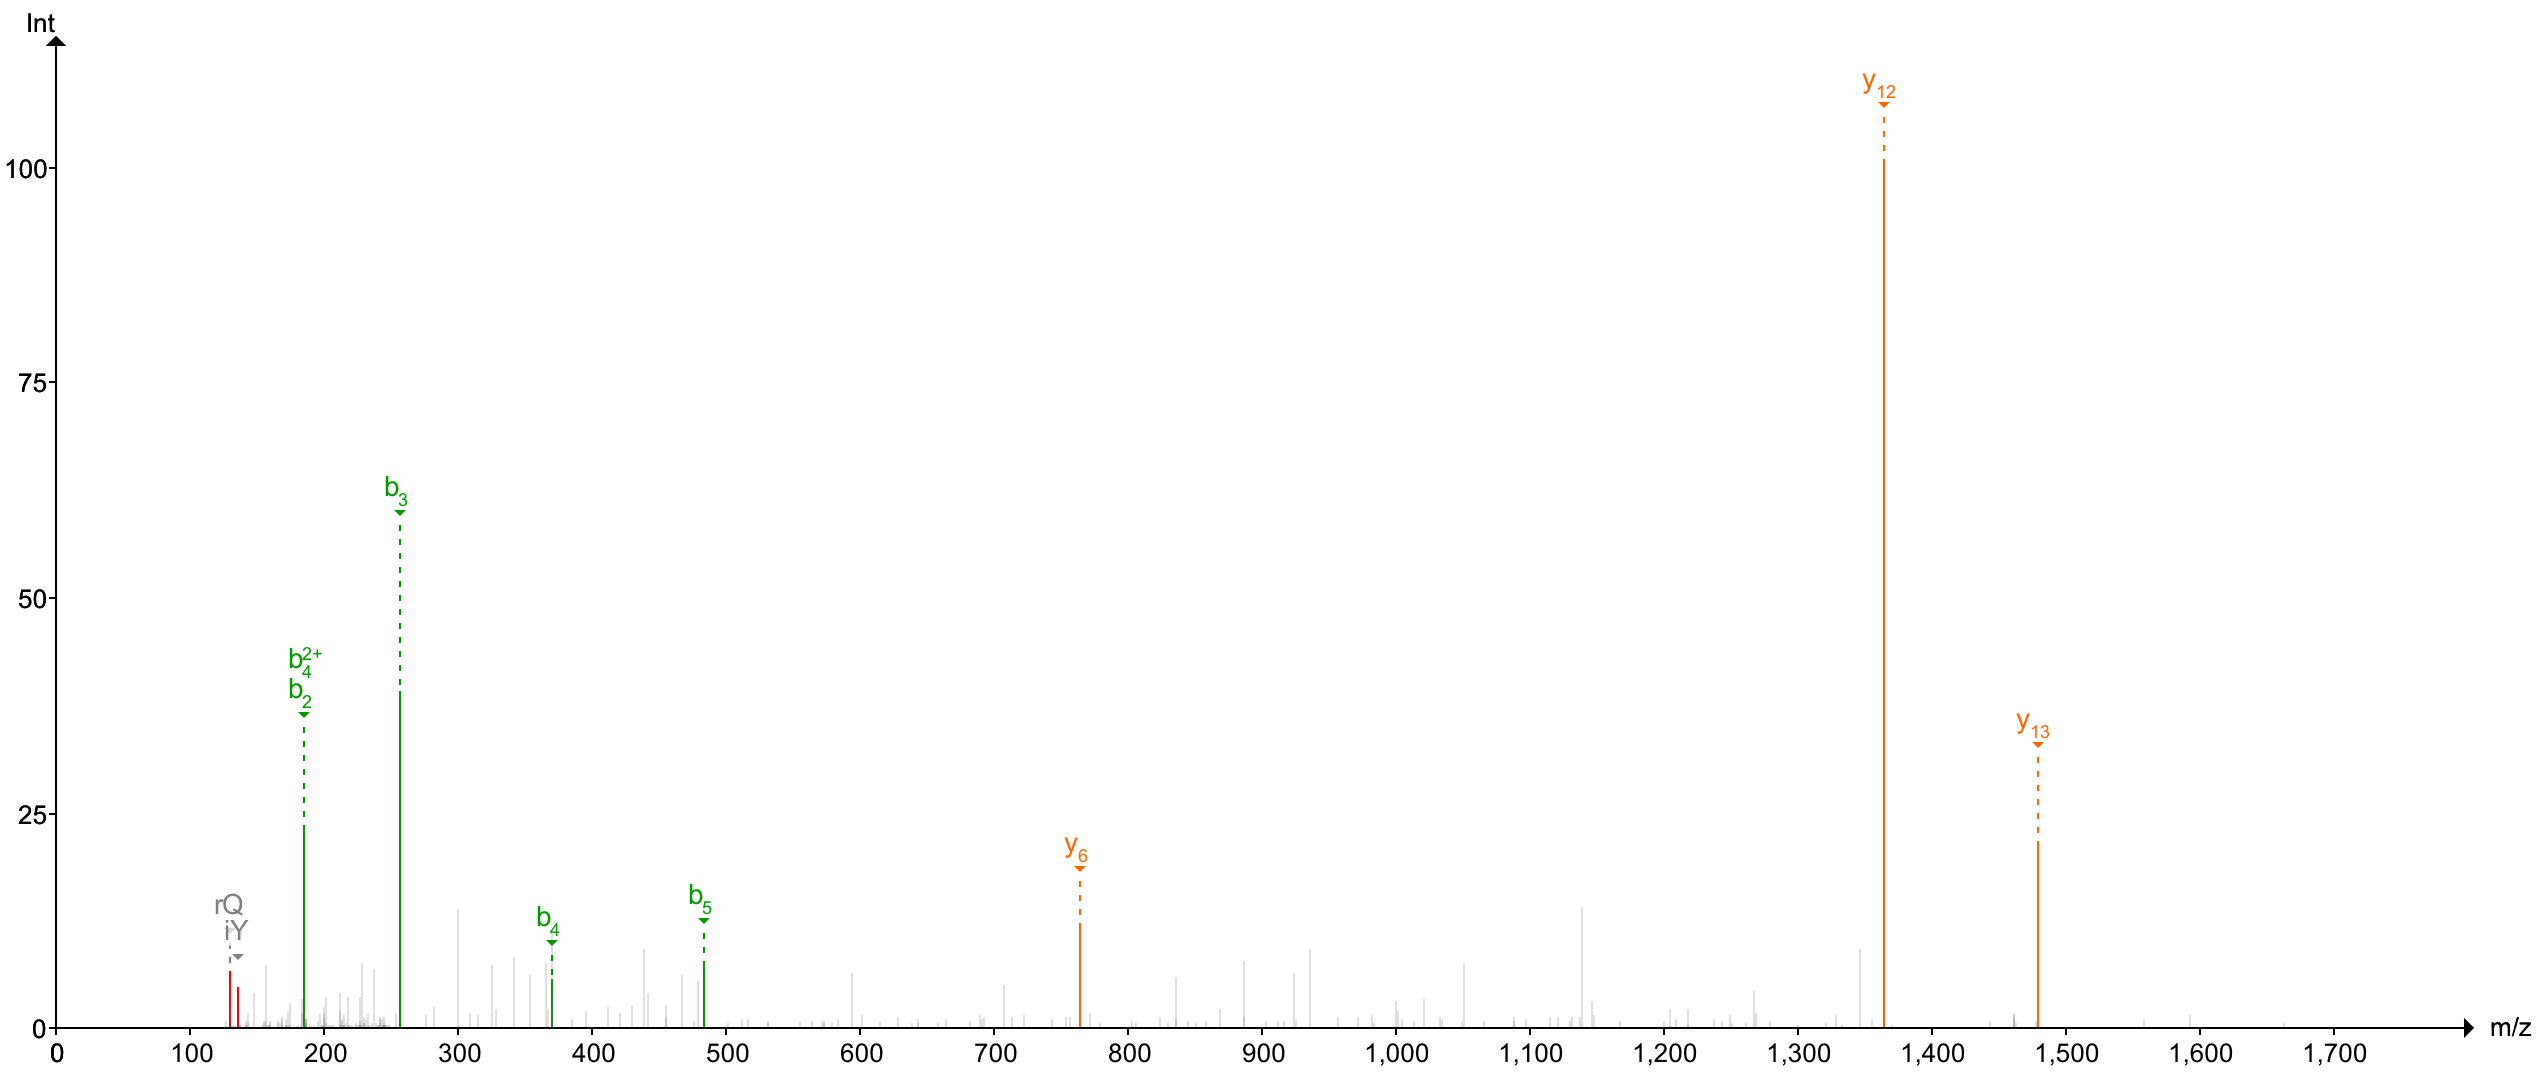

NH<sub>2</sub>-R V P L S P L S L L A G P A D A R-COOH

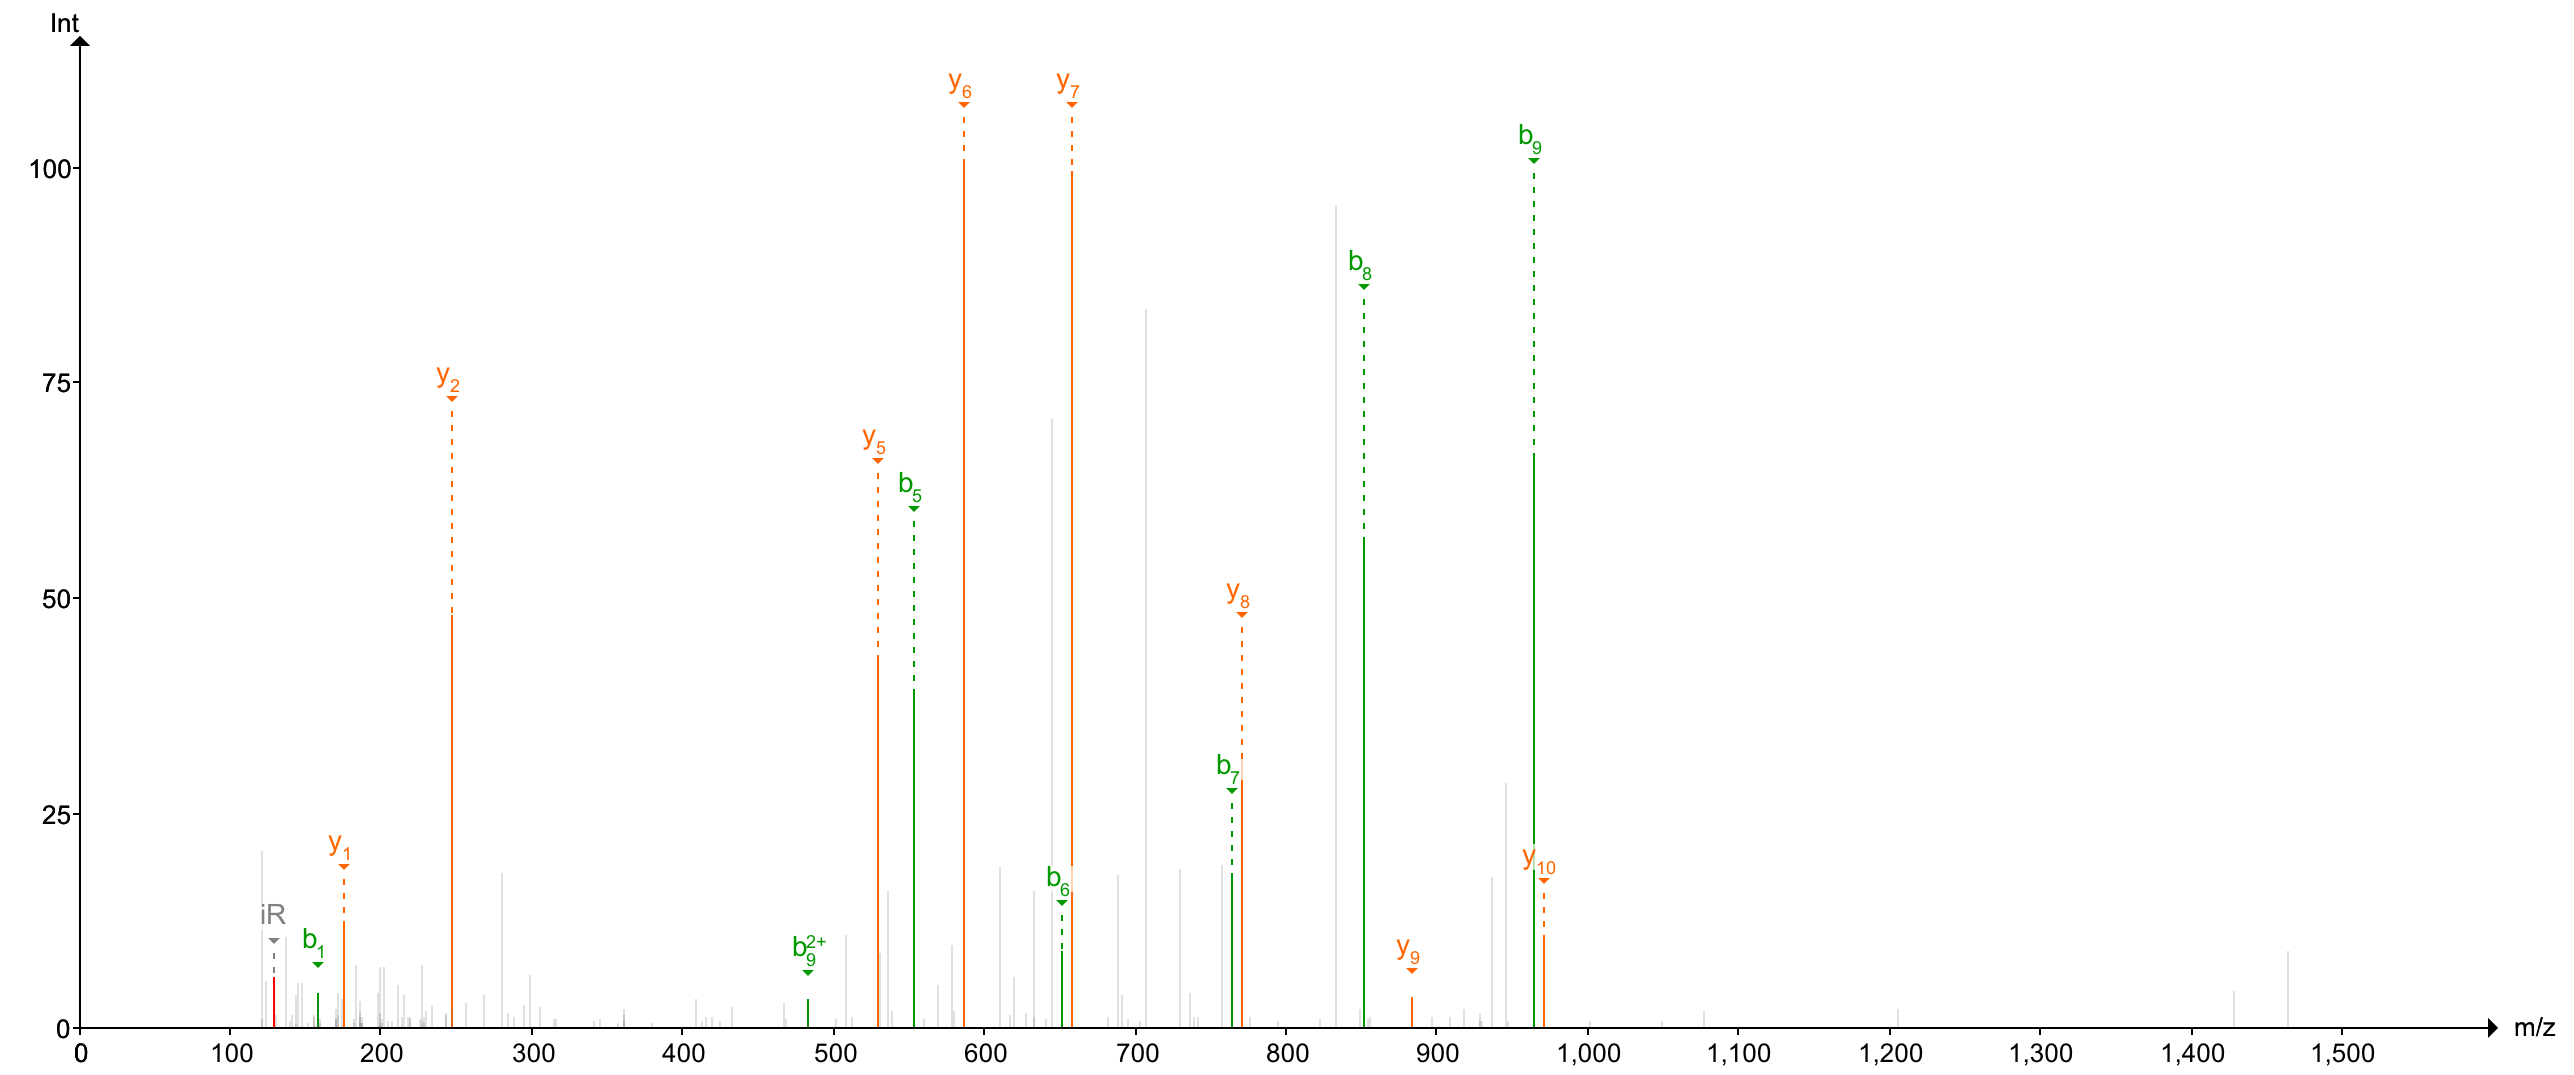

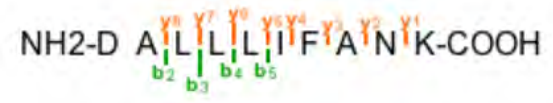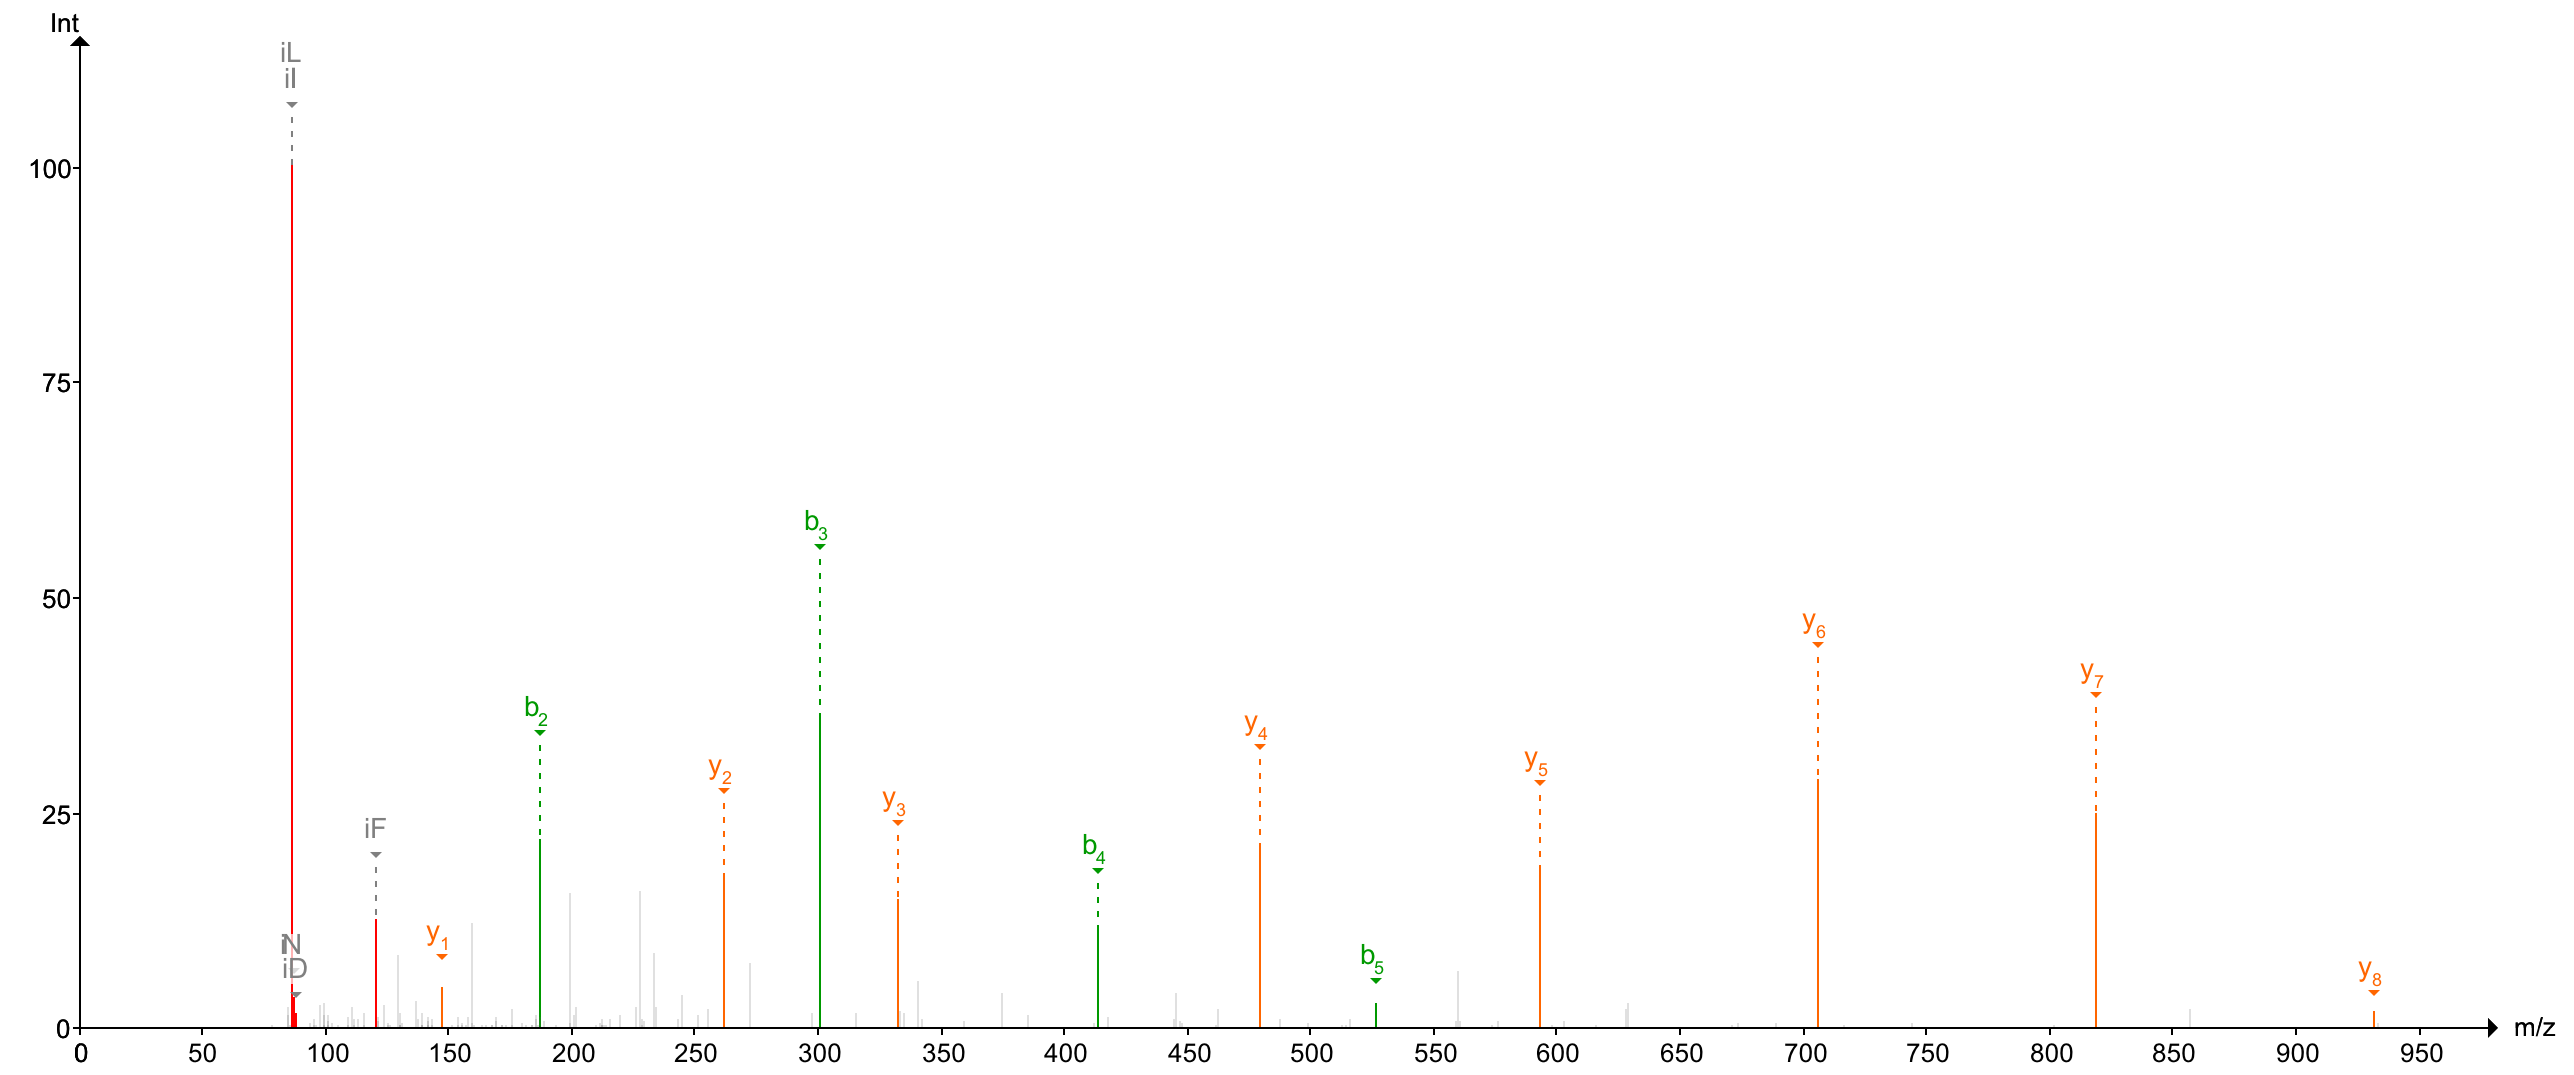

NH<sub>2</sub>-V L L V G A D N F T L L G K-COOH

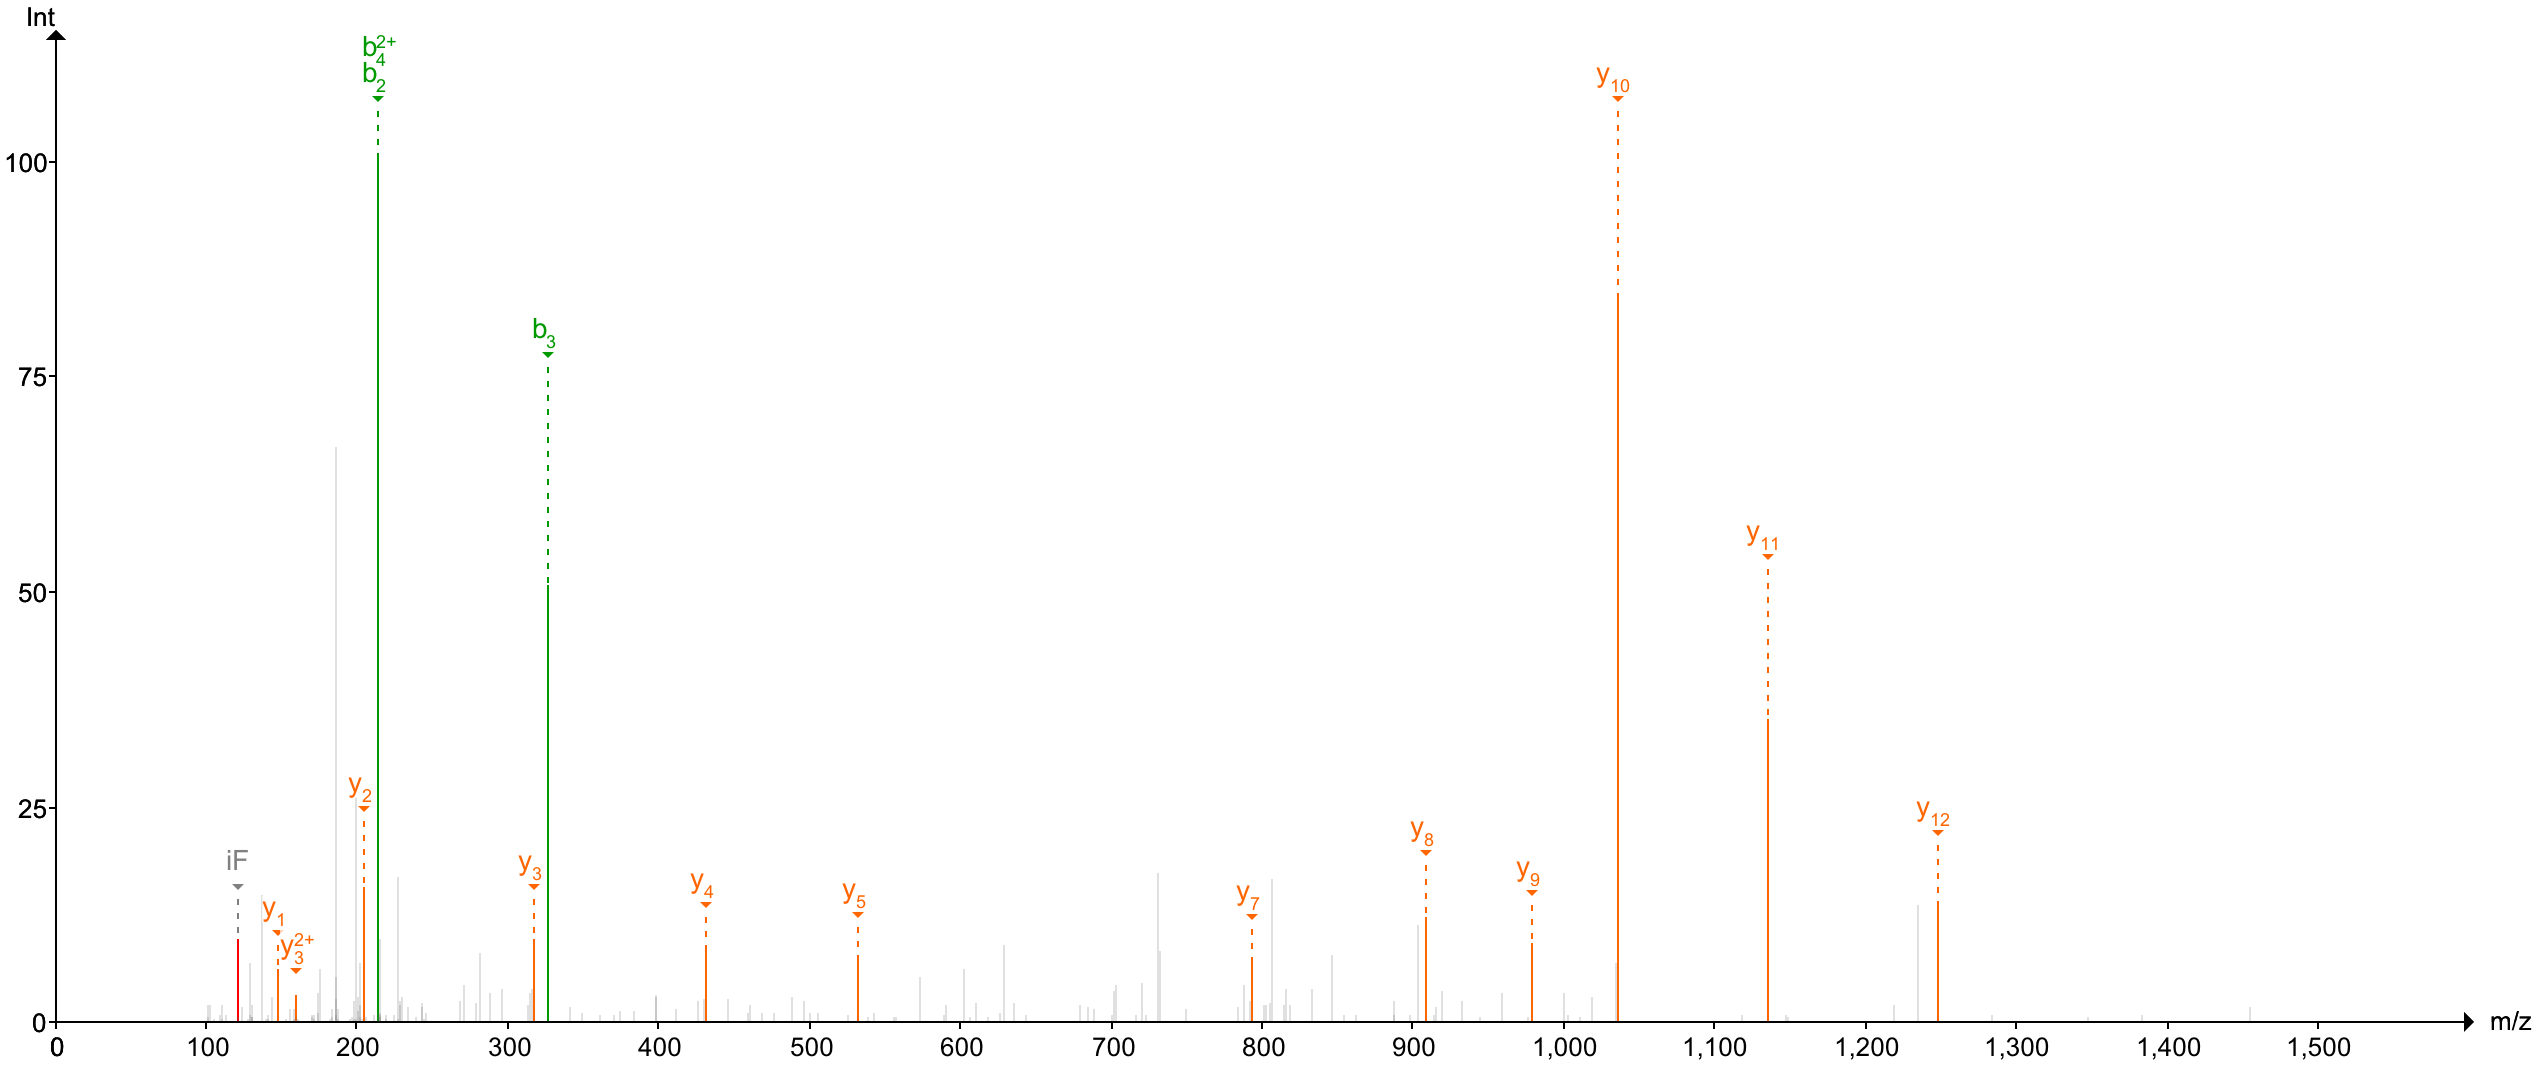

NH<sub>2</sub>-F V F D I F Q F A K-COOH

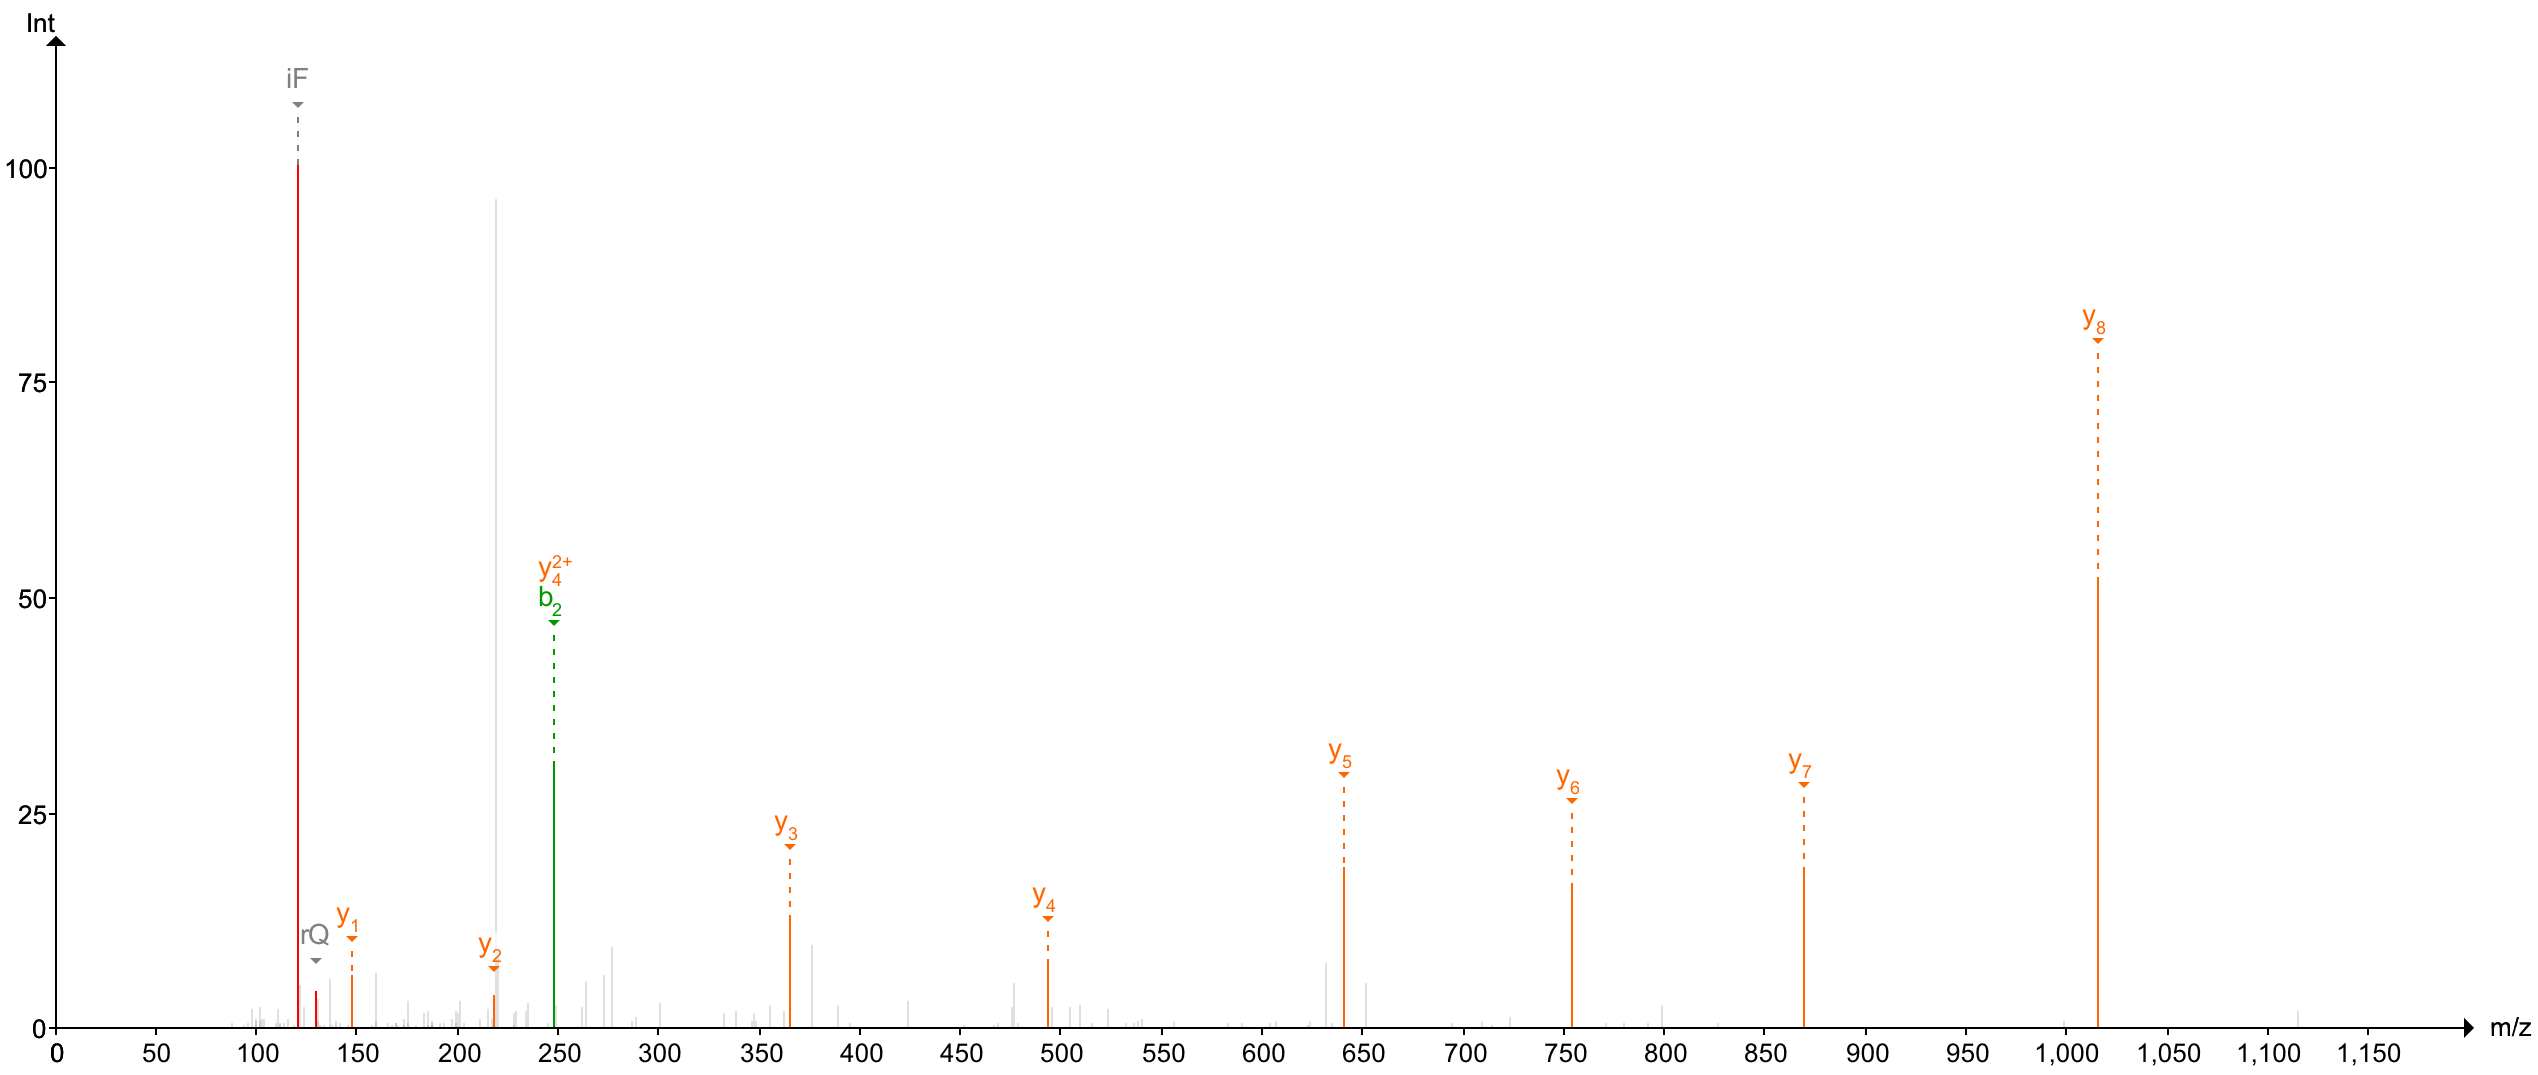



NH<sub>2</sub>-L S<sub>1</sub>G<sub>1</sub>L<sub>1</sub>E<sub>1</sub>Q<sub>1</sub>P<sub>1</sub>Q<sub>1</sub>G<sub>1</sub>A<sub>1</sub>L<sub>1</sub>Q<sub>1</sub>T<sub>1</sub>R-COOH

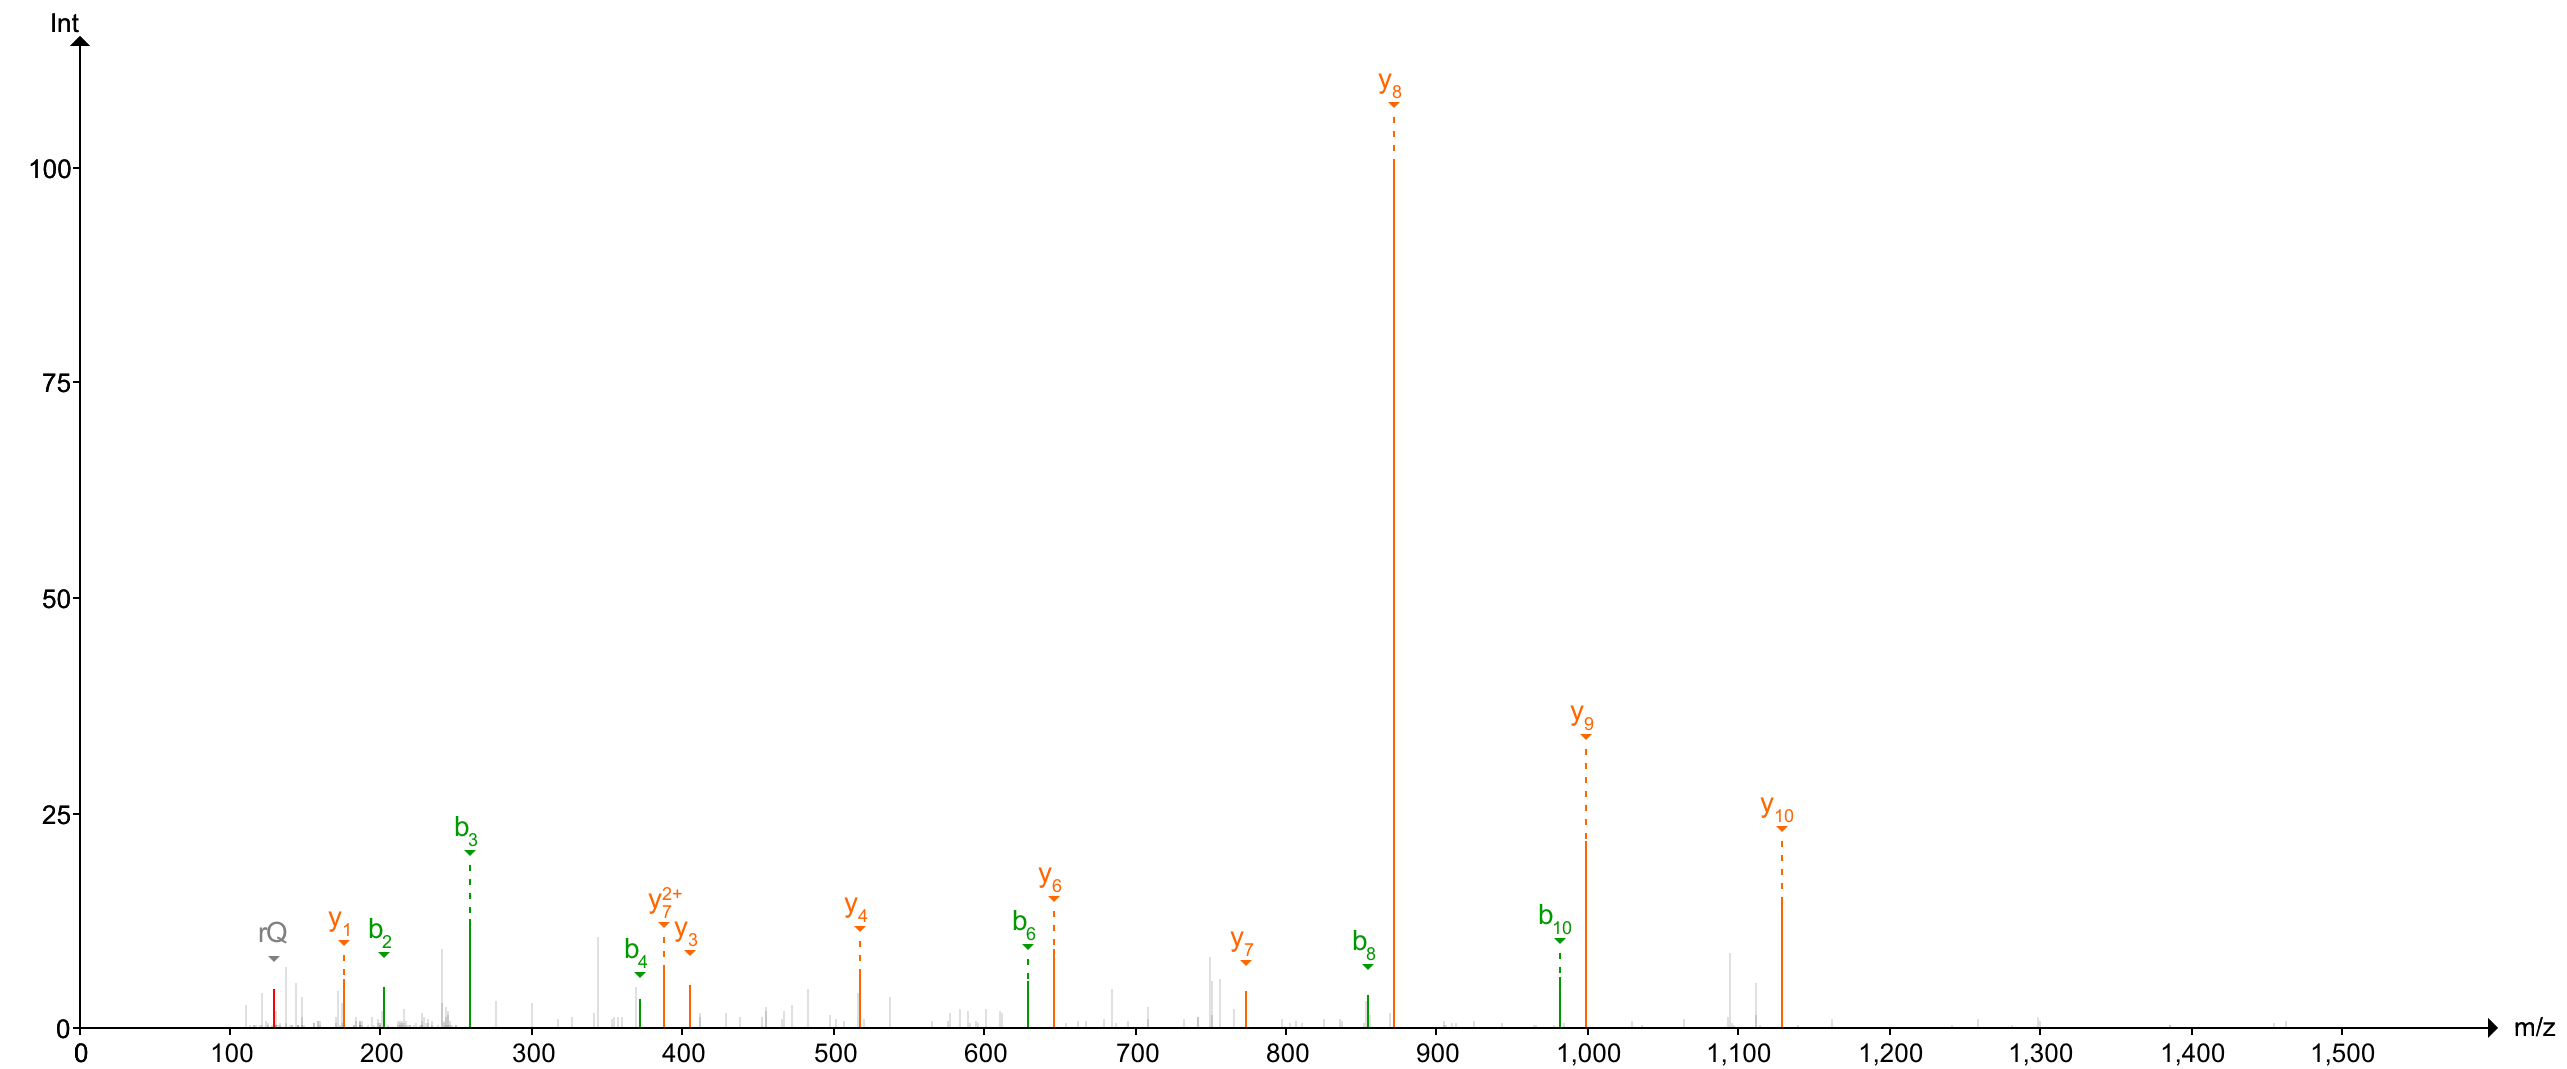

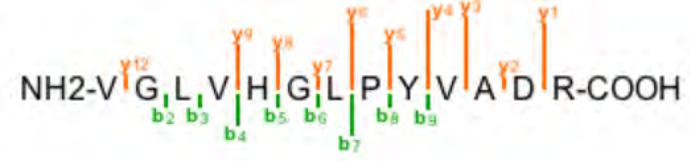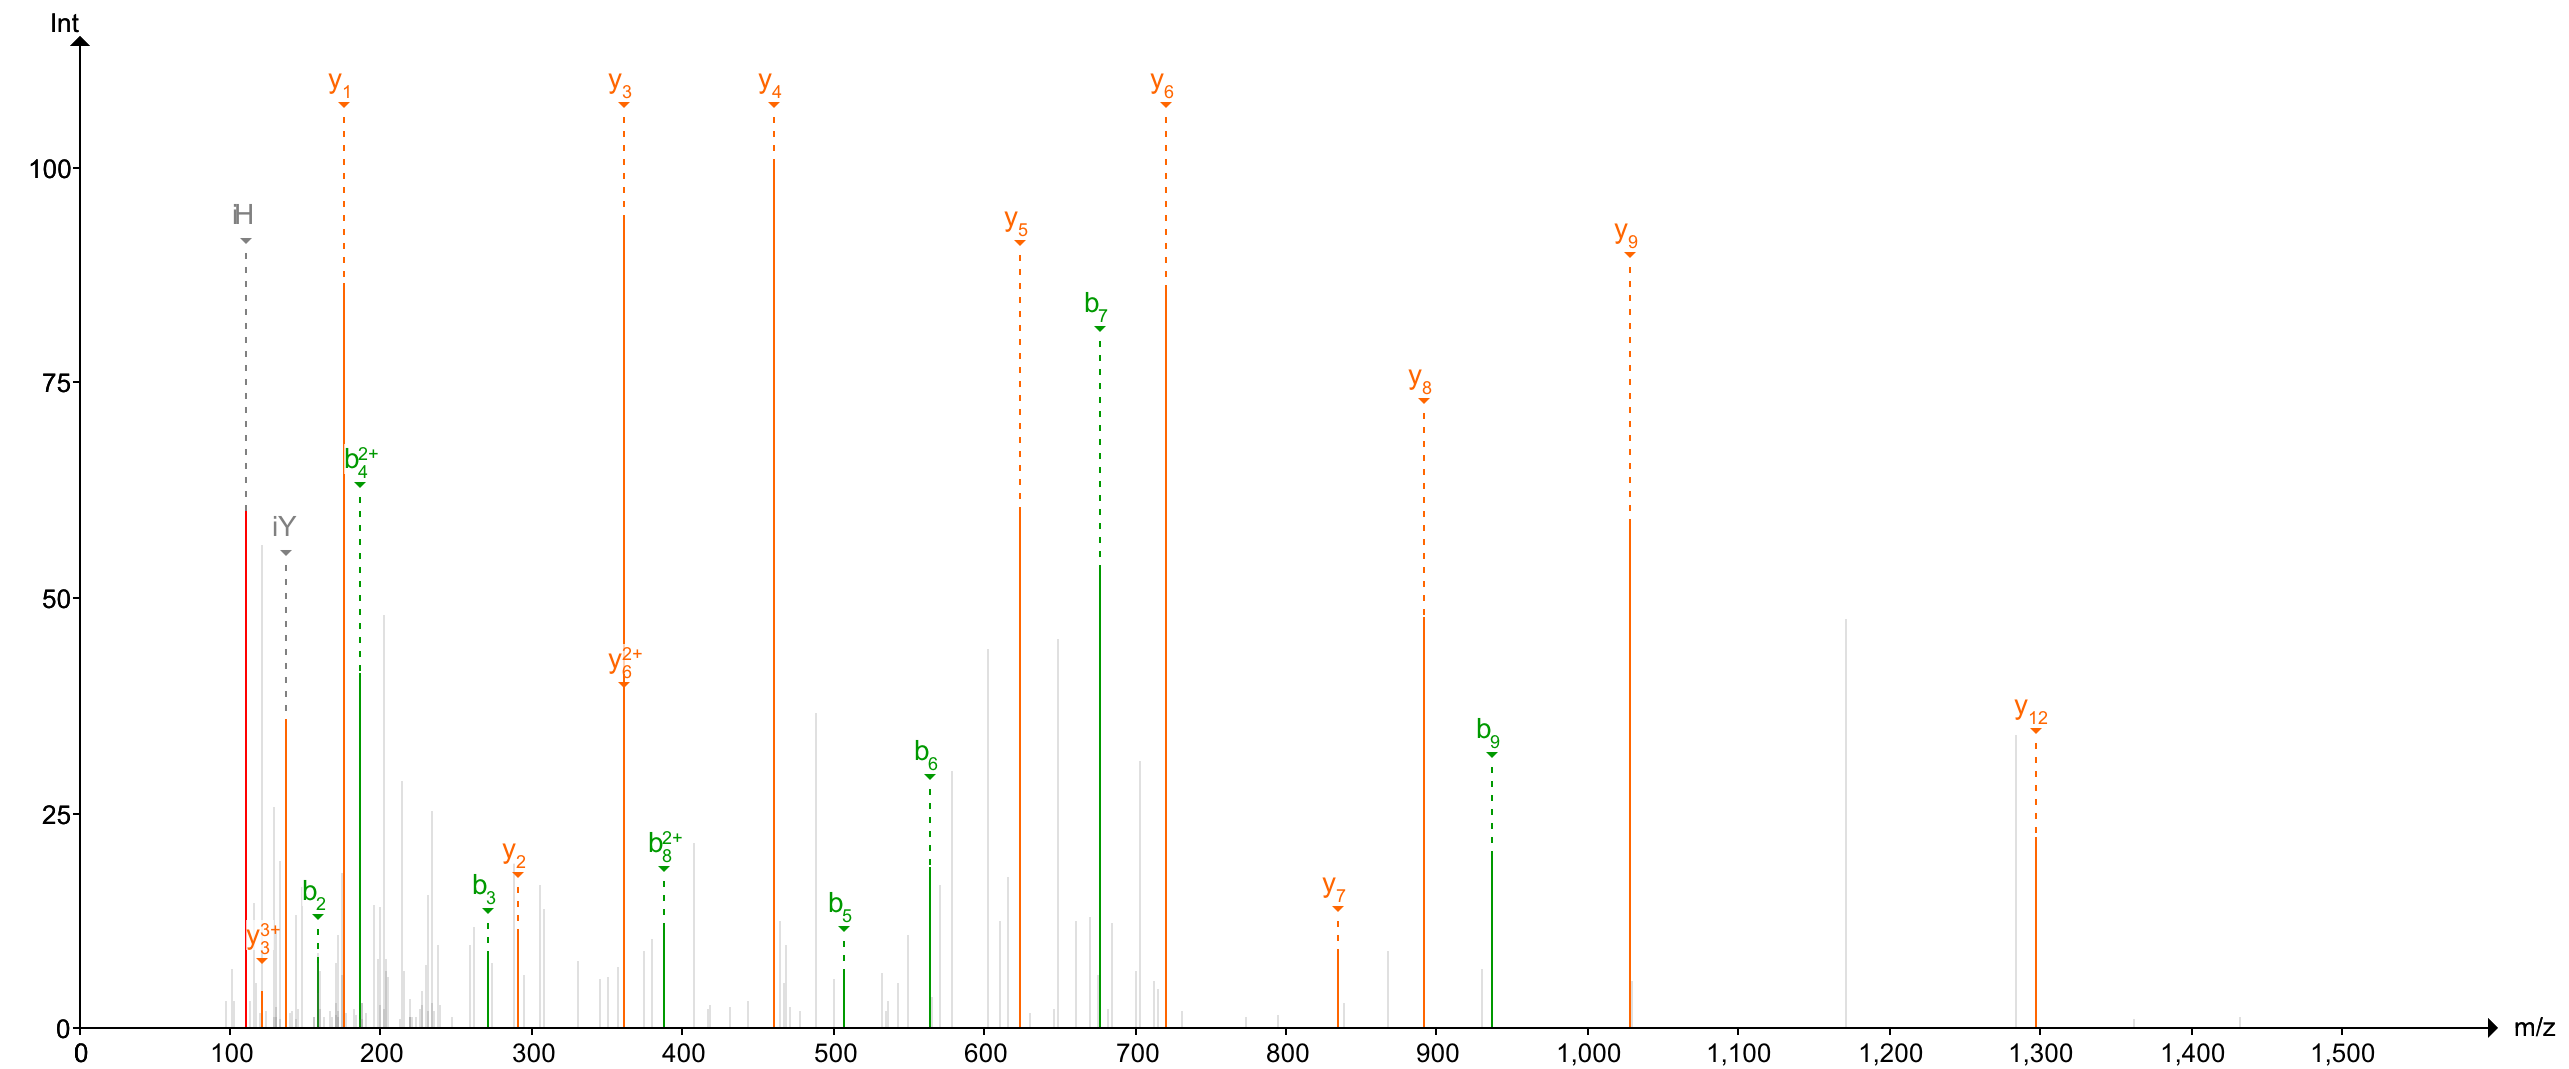

NH<sub>2</sub>-Q<sub>1</sub>Q<sub>2</sub>S E E D<sub>1</sub>L<sub>1</sub>L<sub>2</sub>L<sub>3</sub>L<sub>4</sub>L<sub>5</sub>L<sub>6</sub>L<sub>7</sub>L<sub>8</sub>Q<sub>1</sub>Q<sub>2</sub>D<sub>1</sub>F<sub>1</sub>S<sub>1</sub>R-COOH

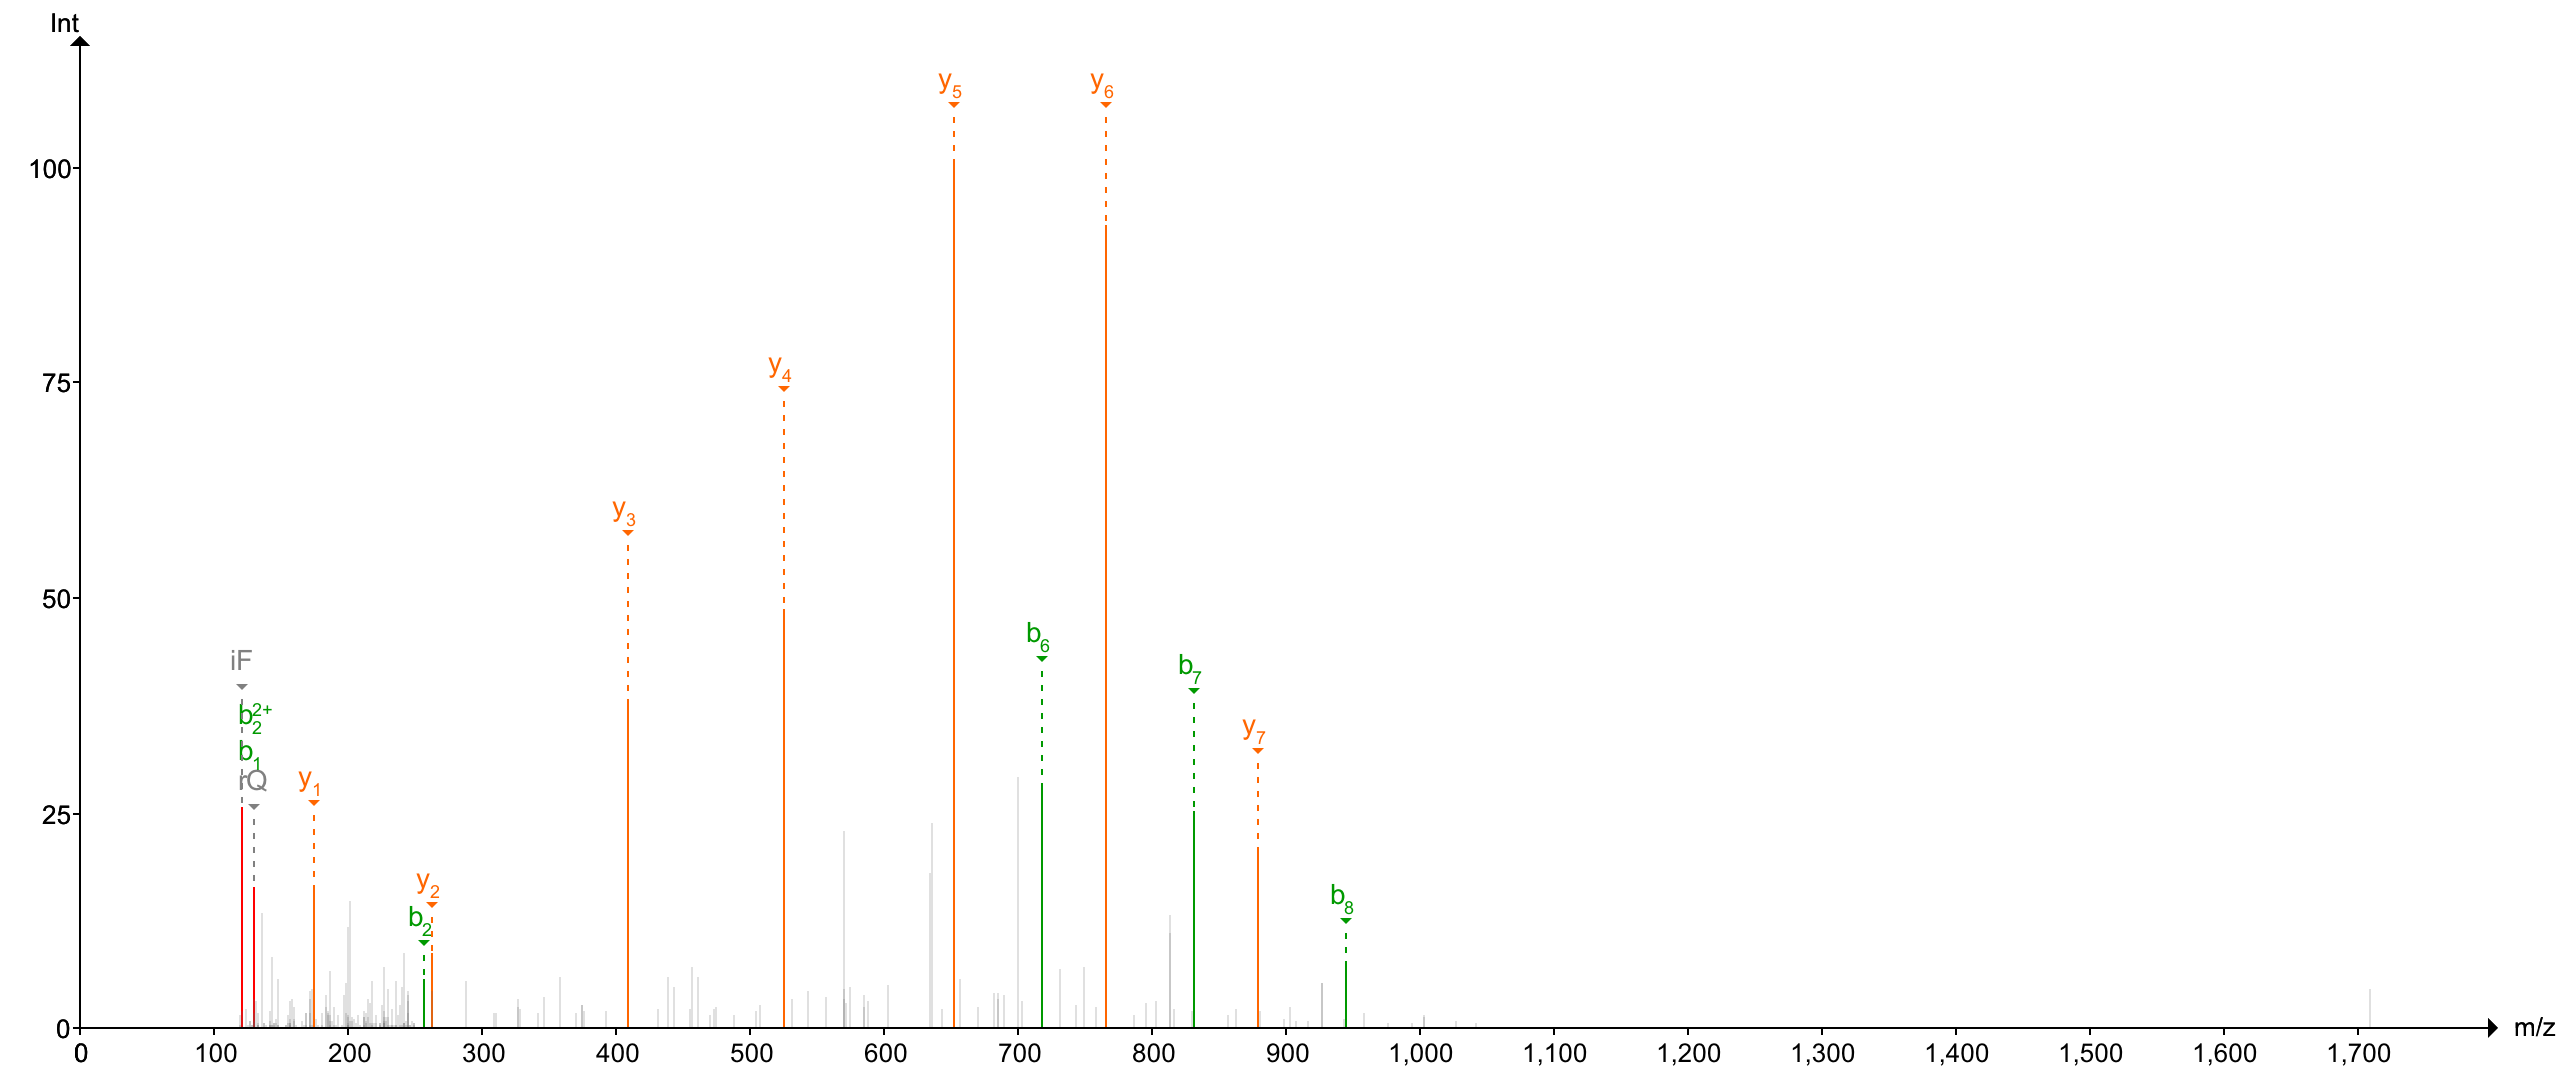

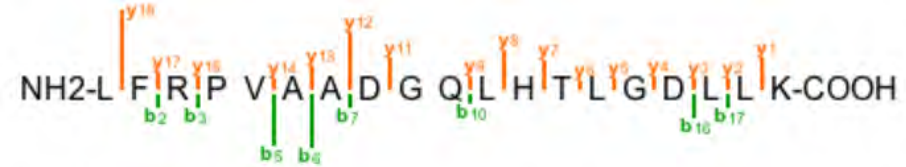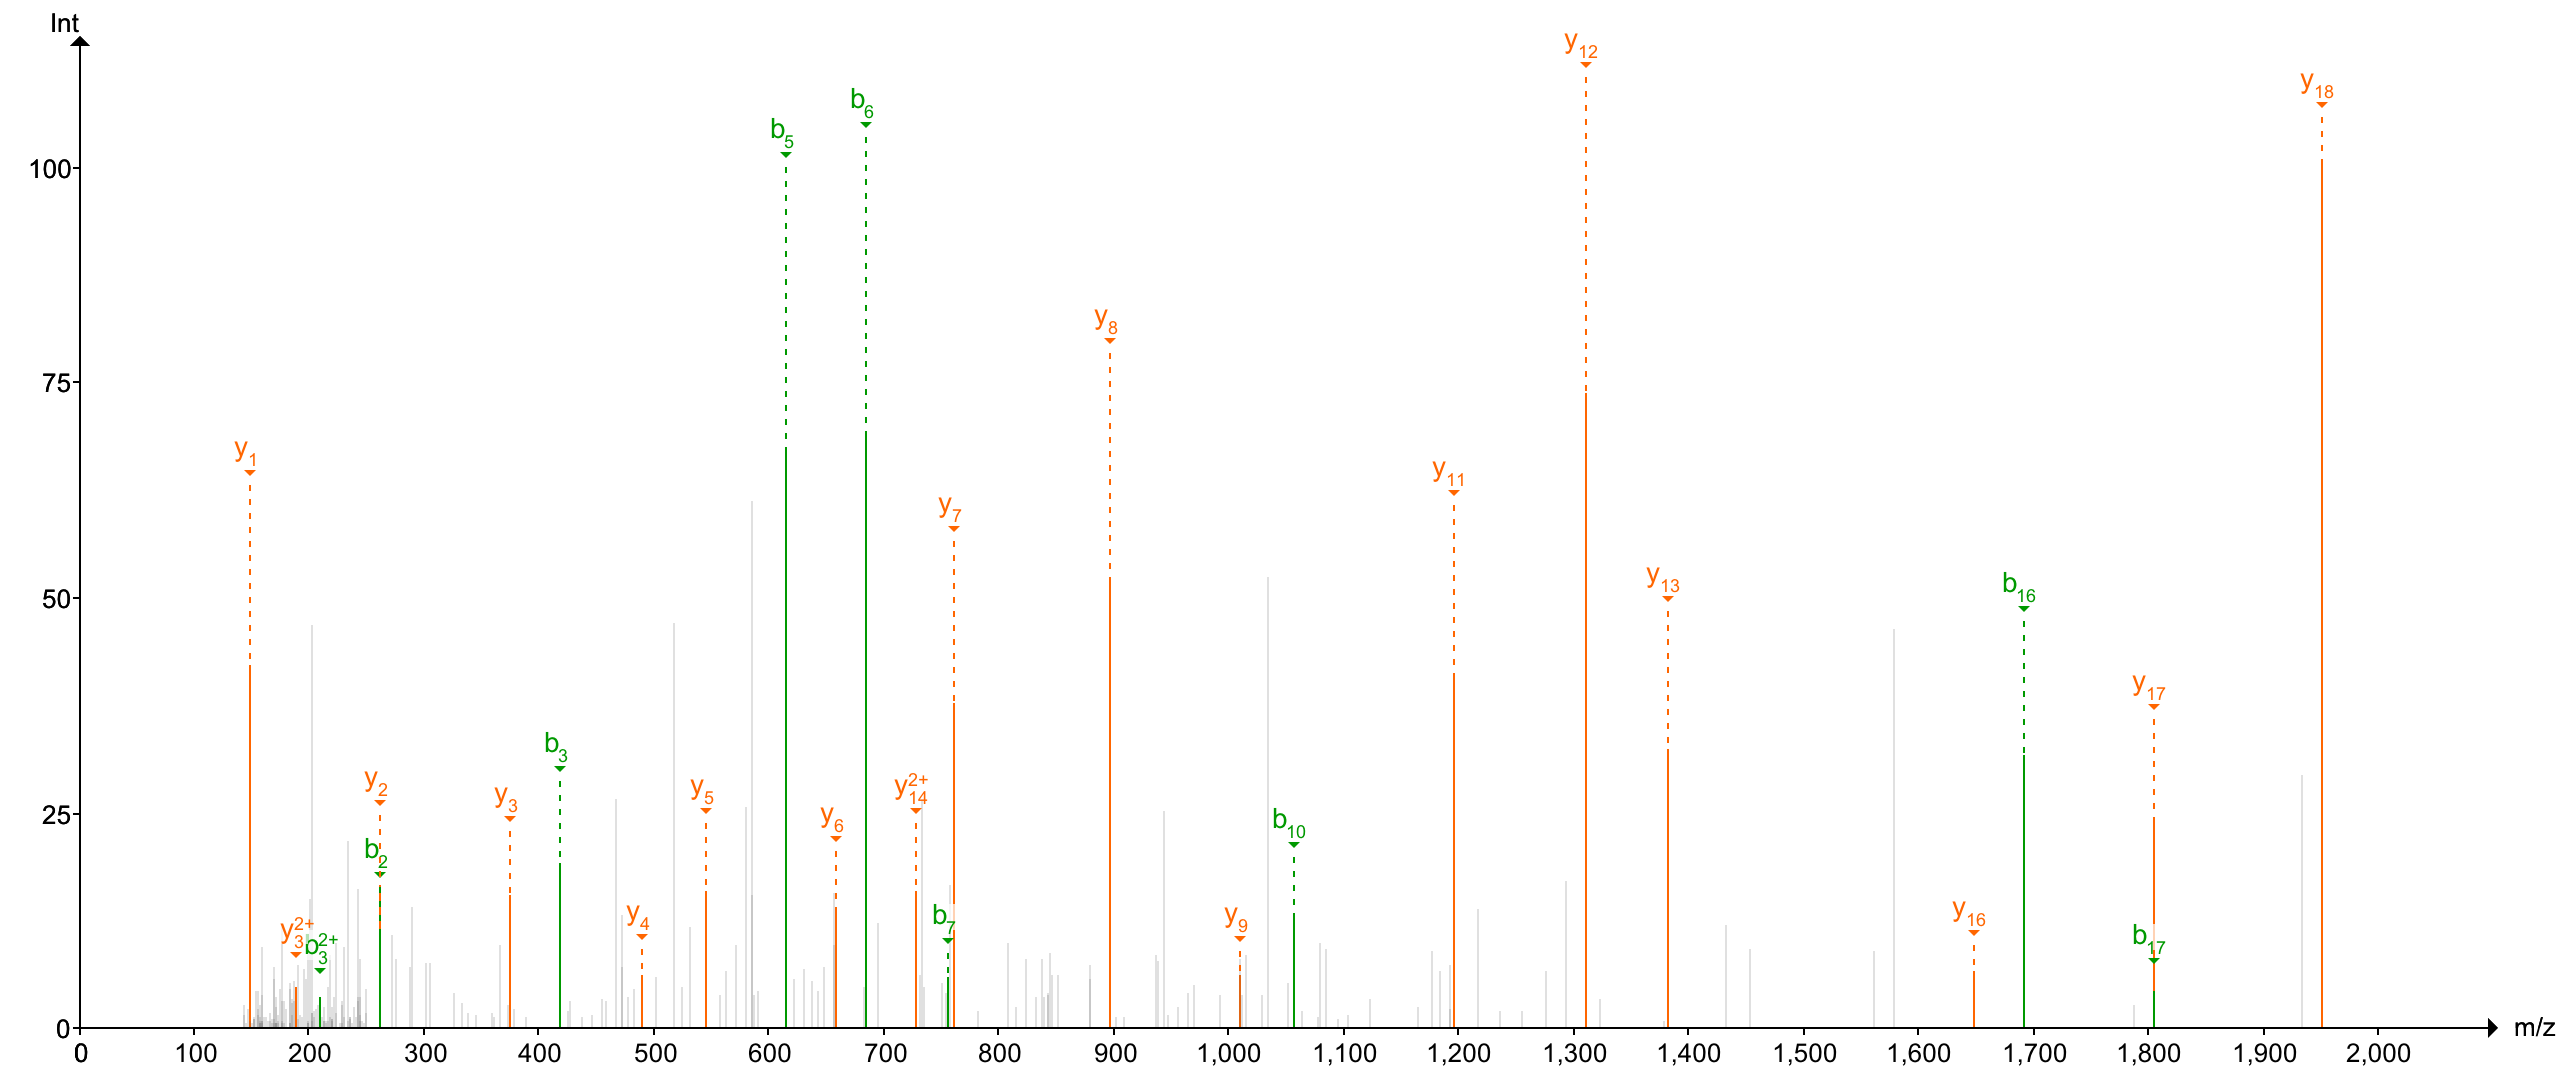

NH<sub>2</sub>-L P I S I I P I L V P V I S A Q K-COOH

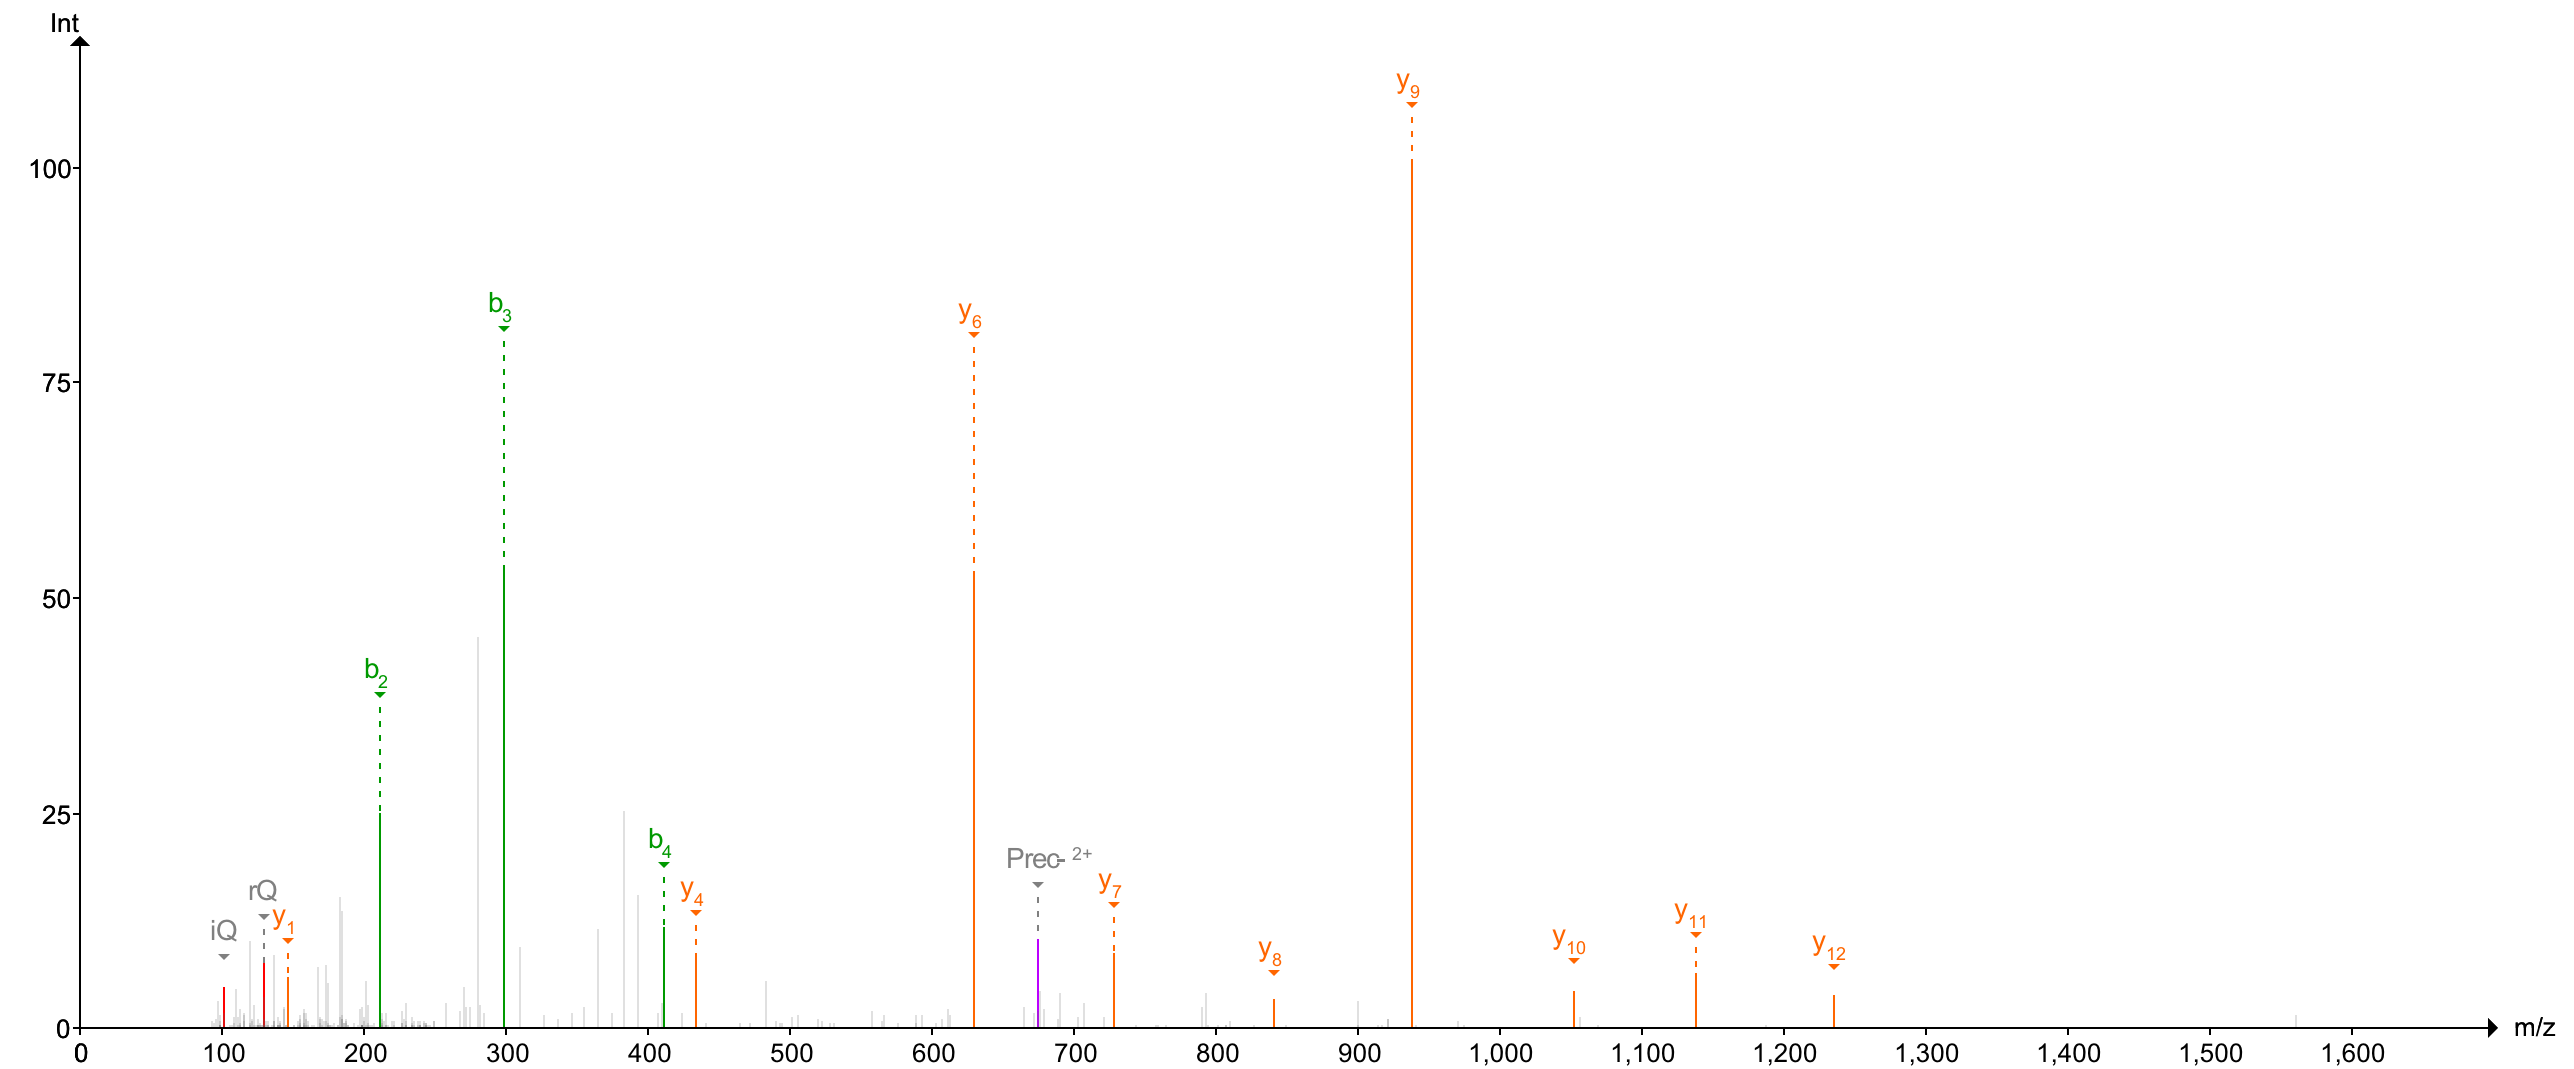

NH<sub>2</sub>-A F I I I T L N S F G T E L S K-COOH

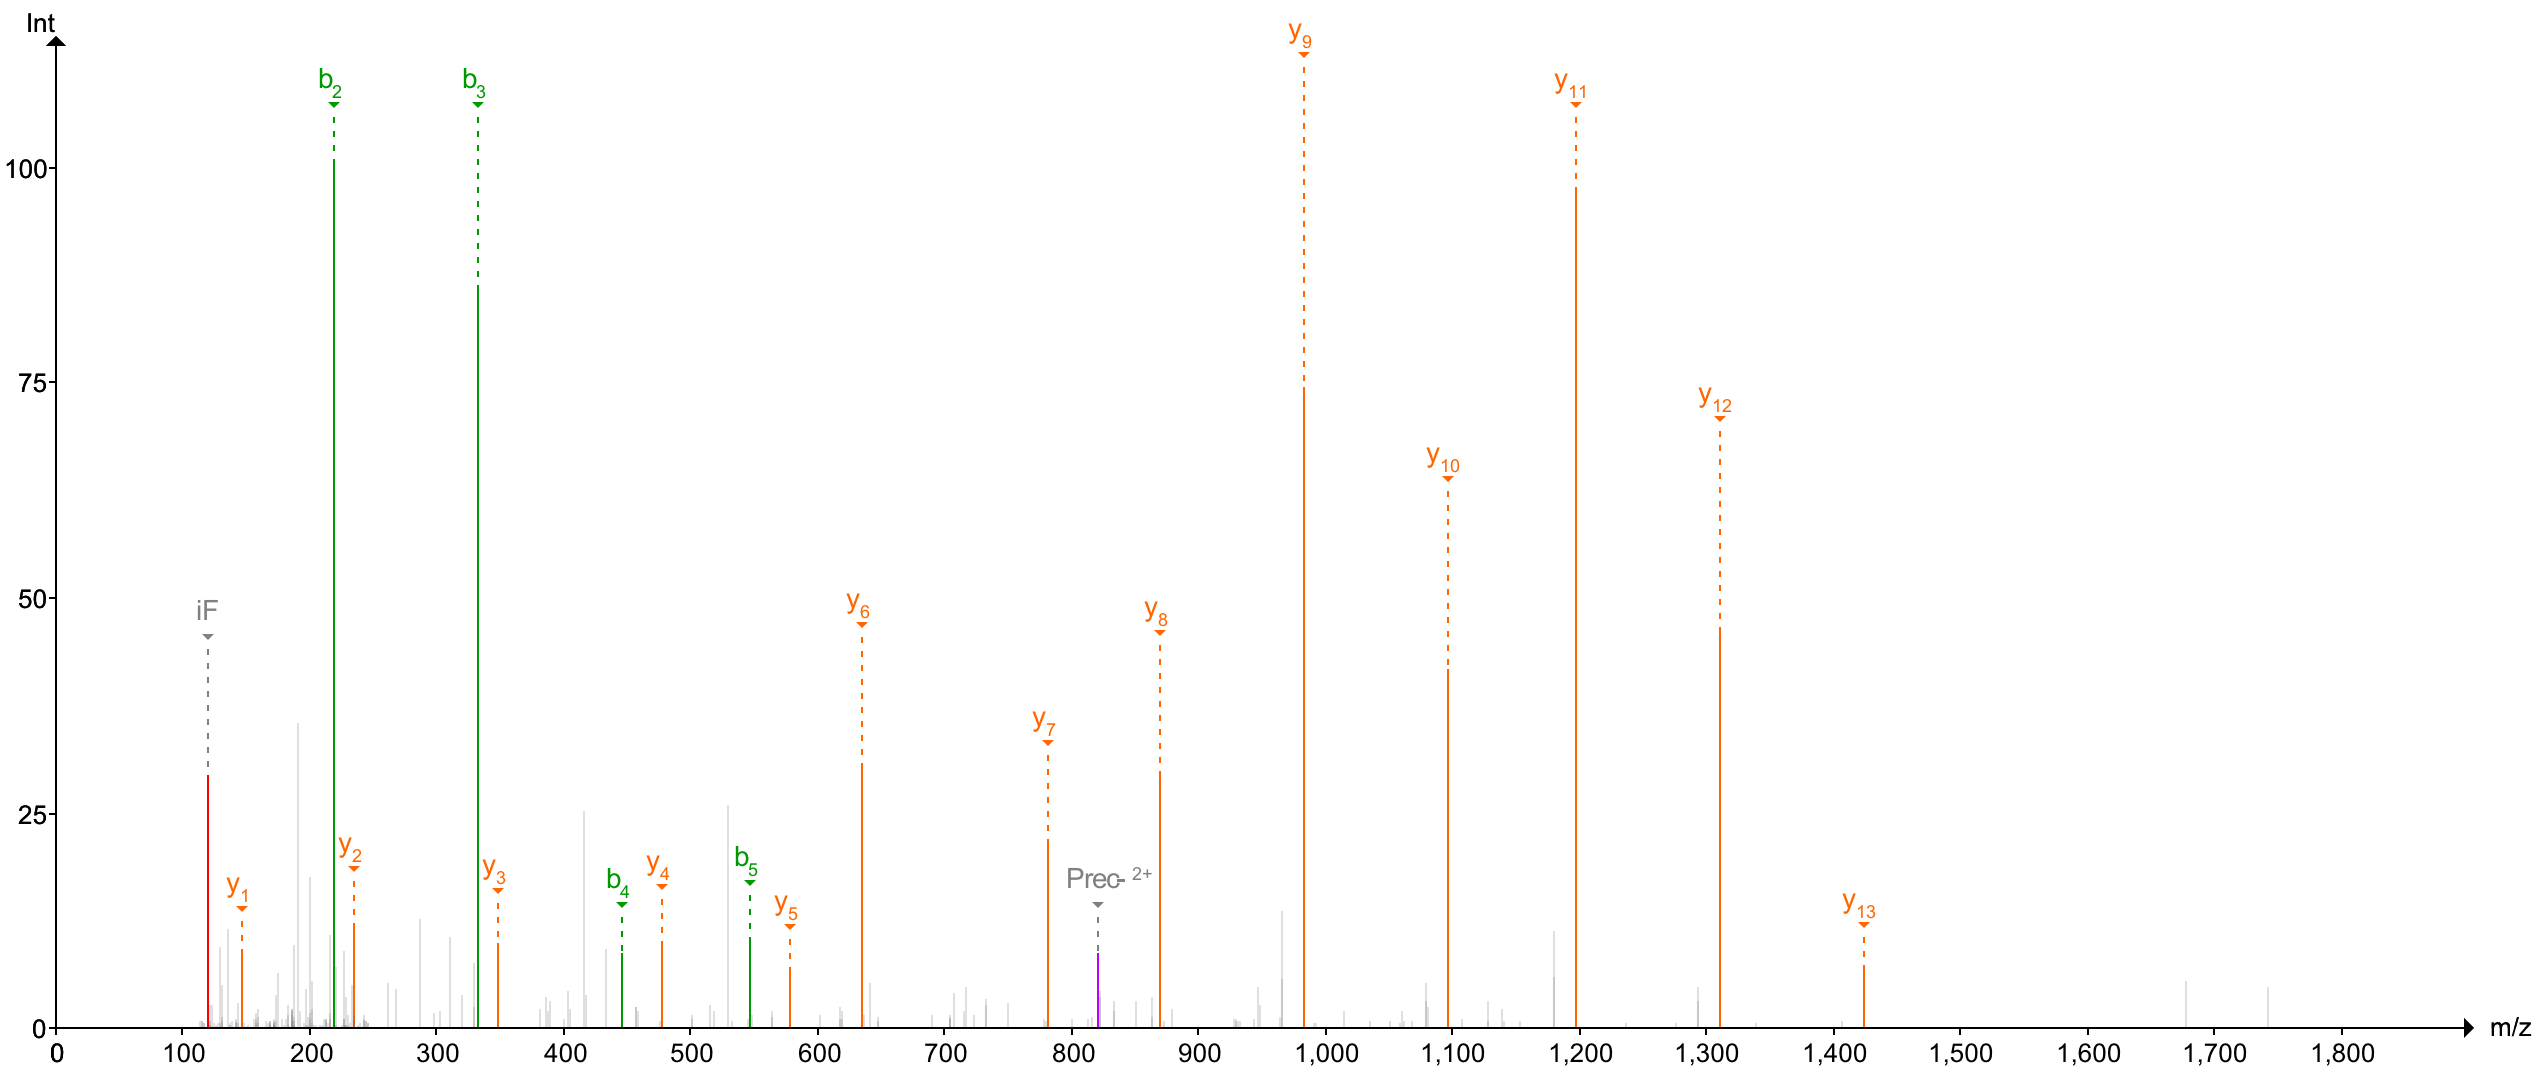

NH<sub>2</sub>-R<sub>1</sub>H<sub>1</sub>I<sub>1</sub>L<sub>1</sub>L<sub>1</sub>H<sub>1</sub>T<sub>1</sub>G<sub>1</sub>E<sub>1</sub>K-COOH  
b<sub>1</sub> y<sub>8</sub> y<sub>7</sub> y<sub>6</sub> y<sub>5</sub> y<sub>4</sub> y<sub>1</sub>  
b<sub>2</sub> b<sub>3</sub> b<sub>4</sub> b<sub>5</sub> b<sub>6</sub> b<sub>9</sub>

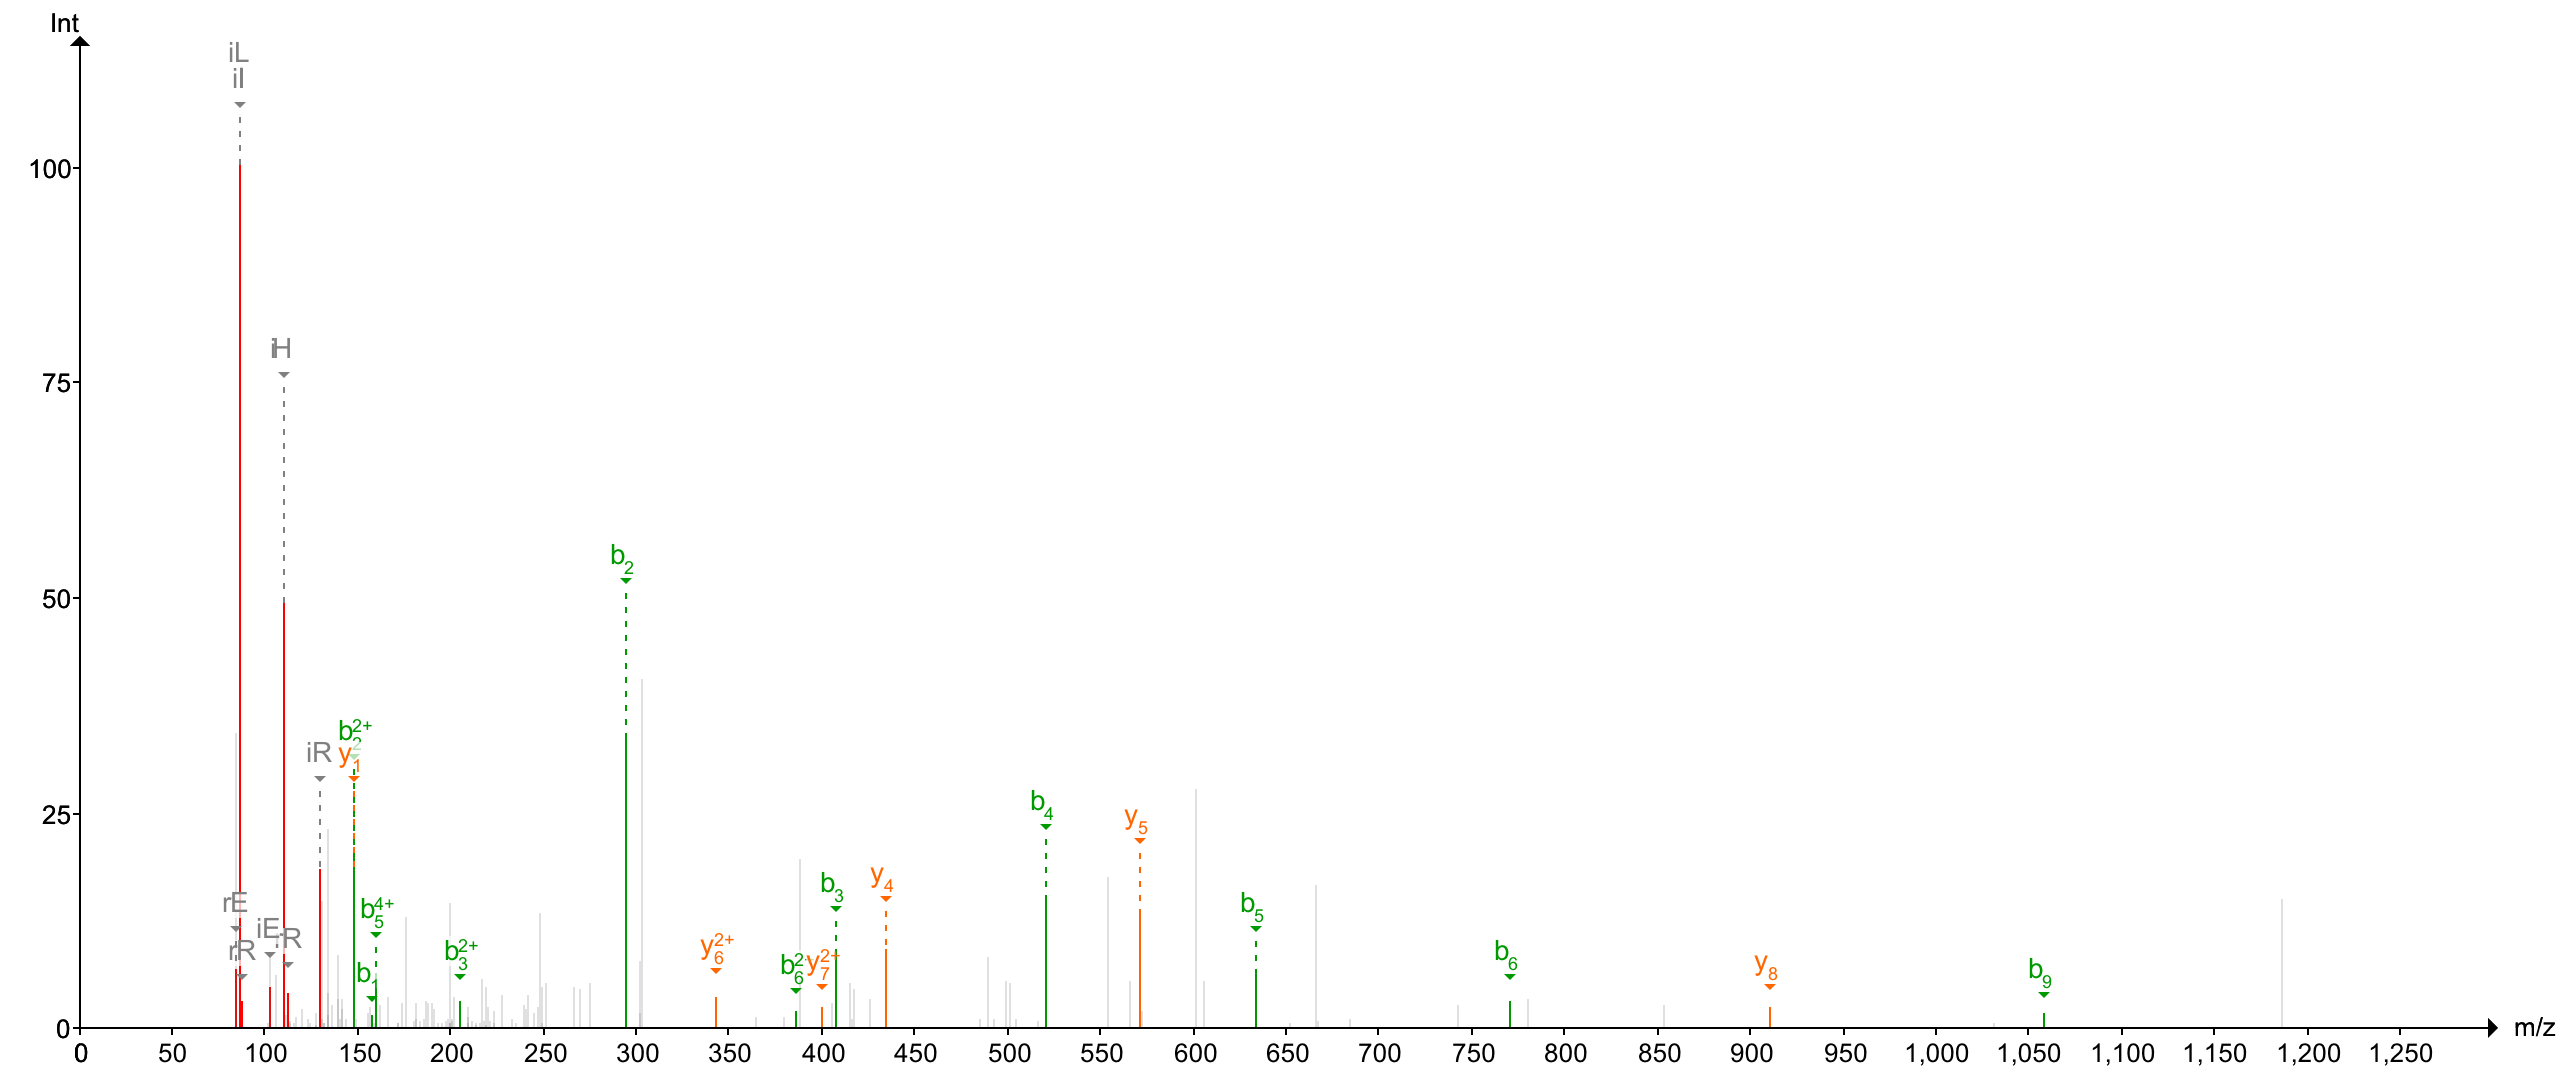

NH<sub>2</sub>-L G A A V A P E G N Q K-COOH

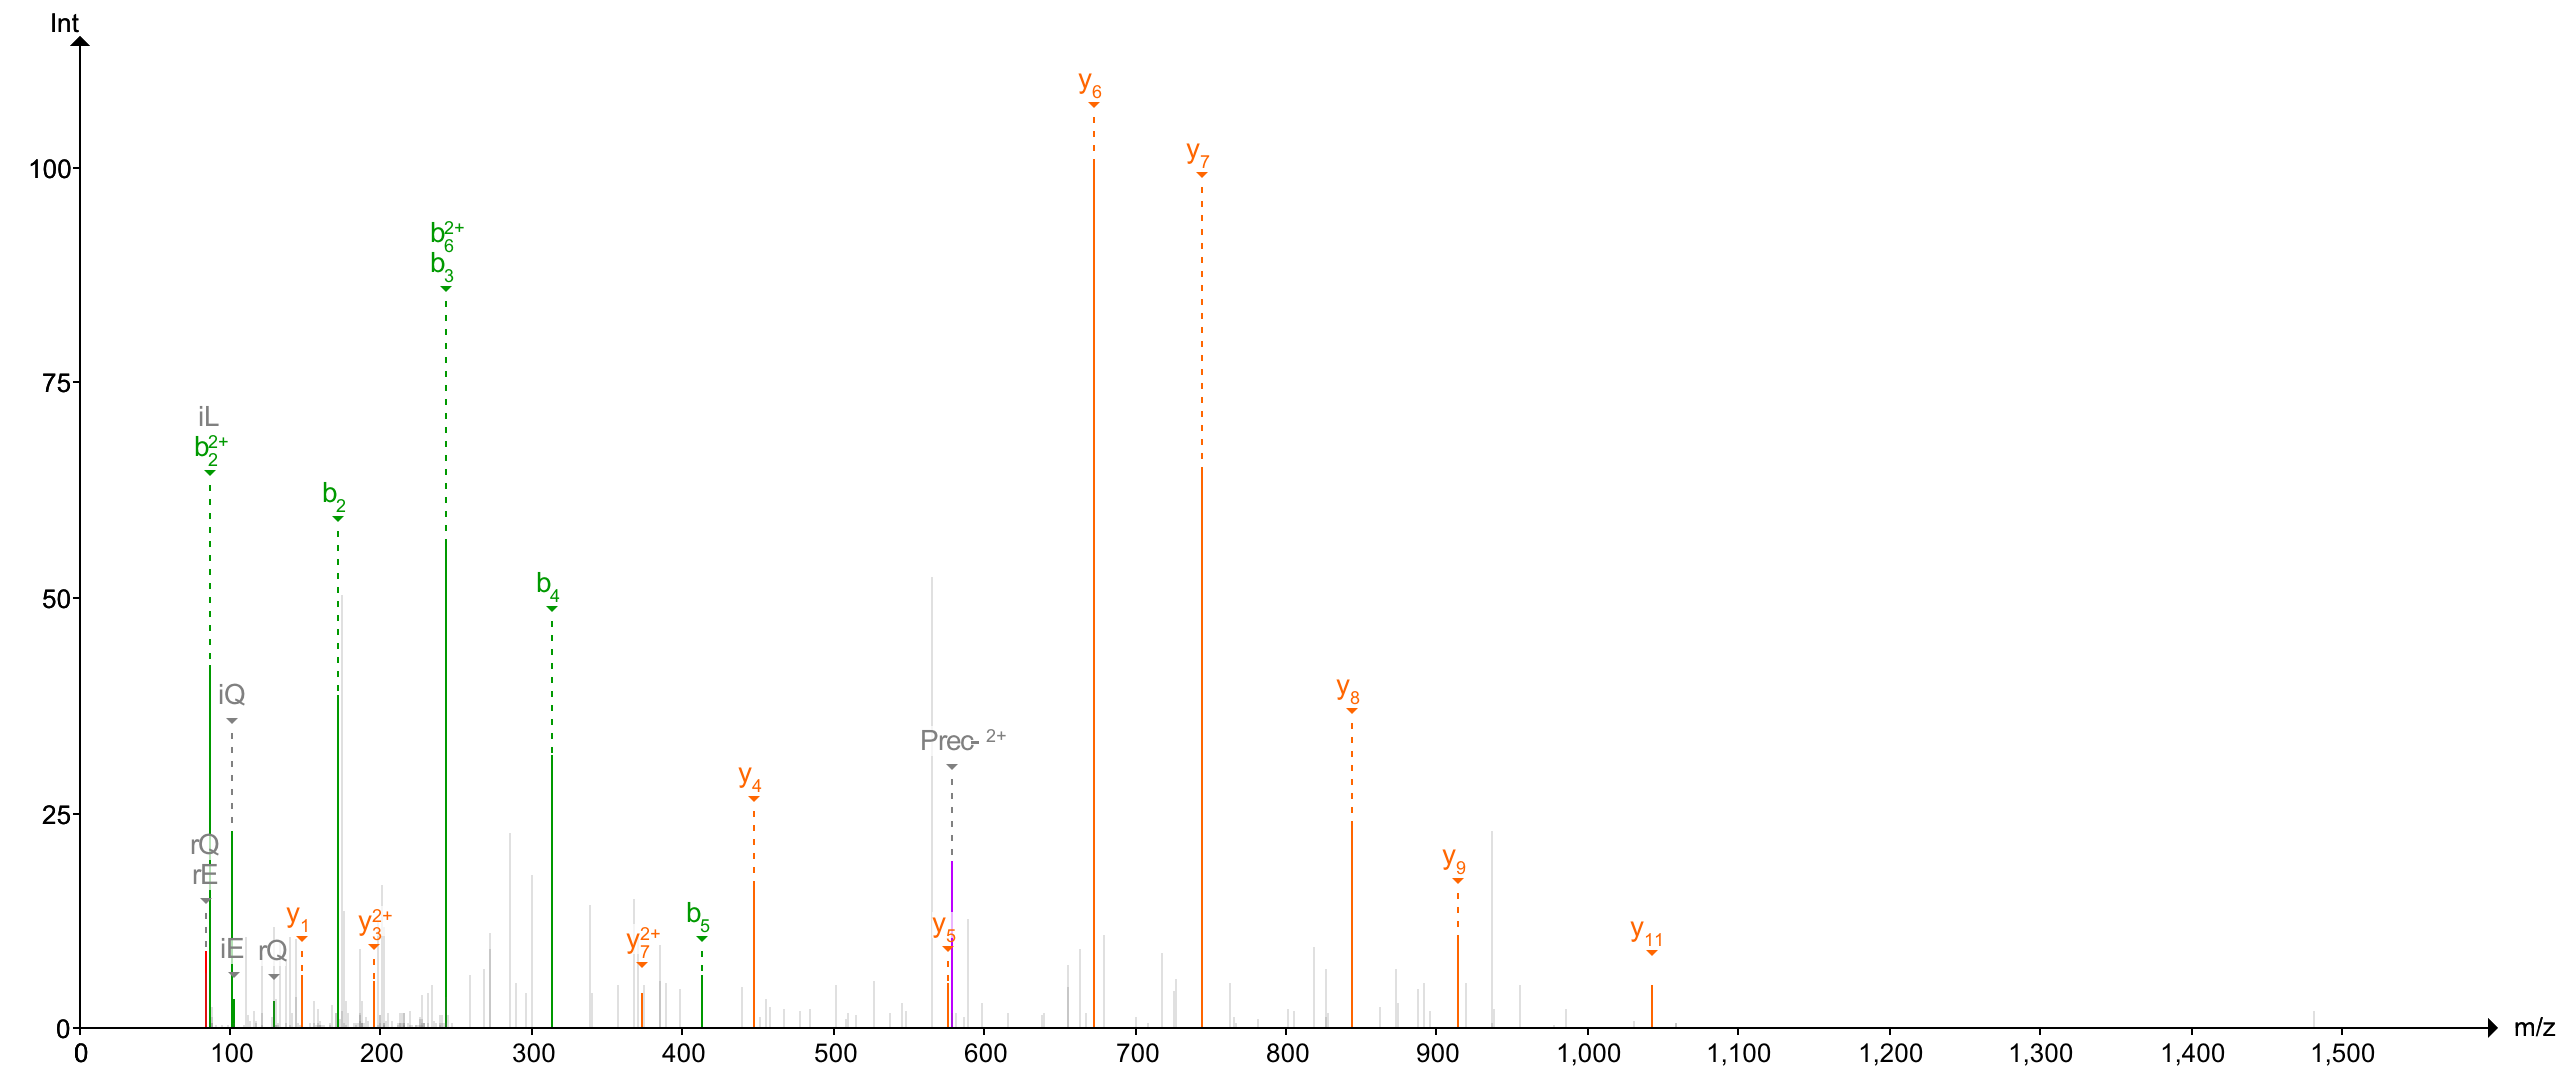



NH<sub>2</sub>-L G H I F T T T V R-COOH

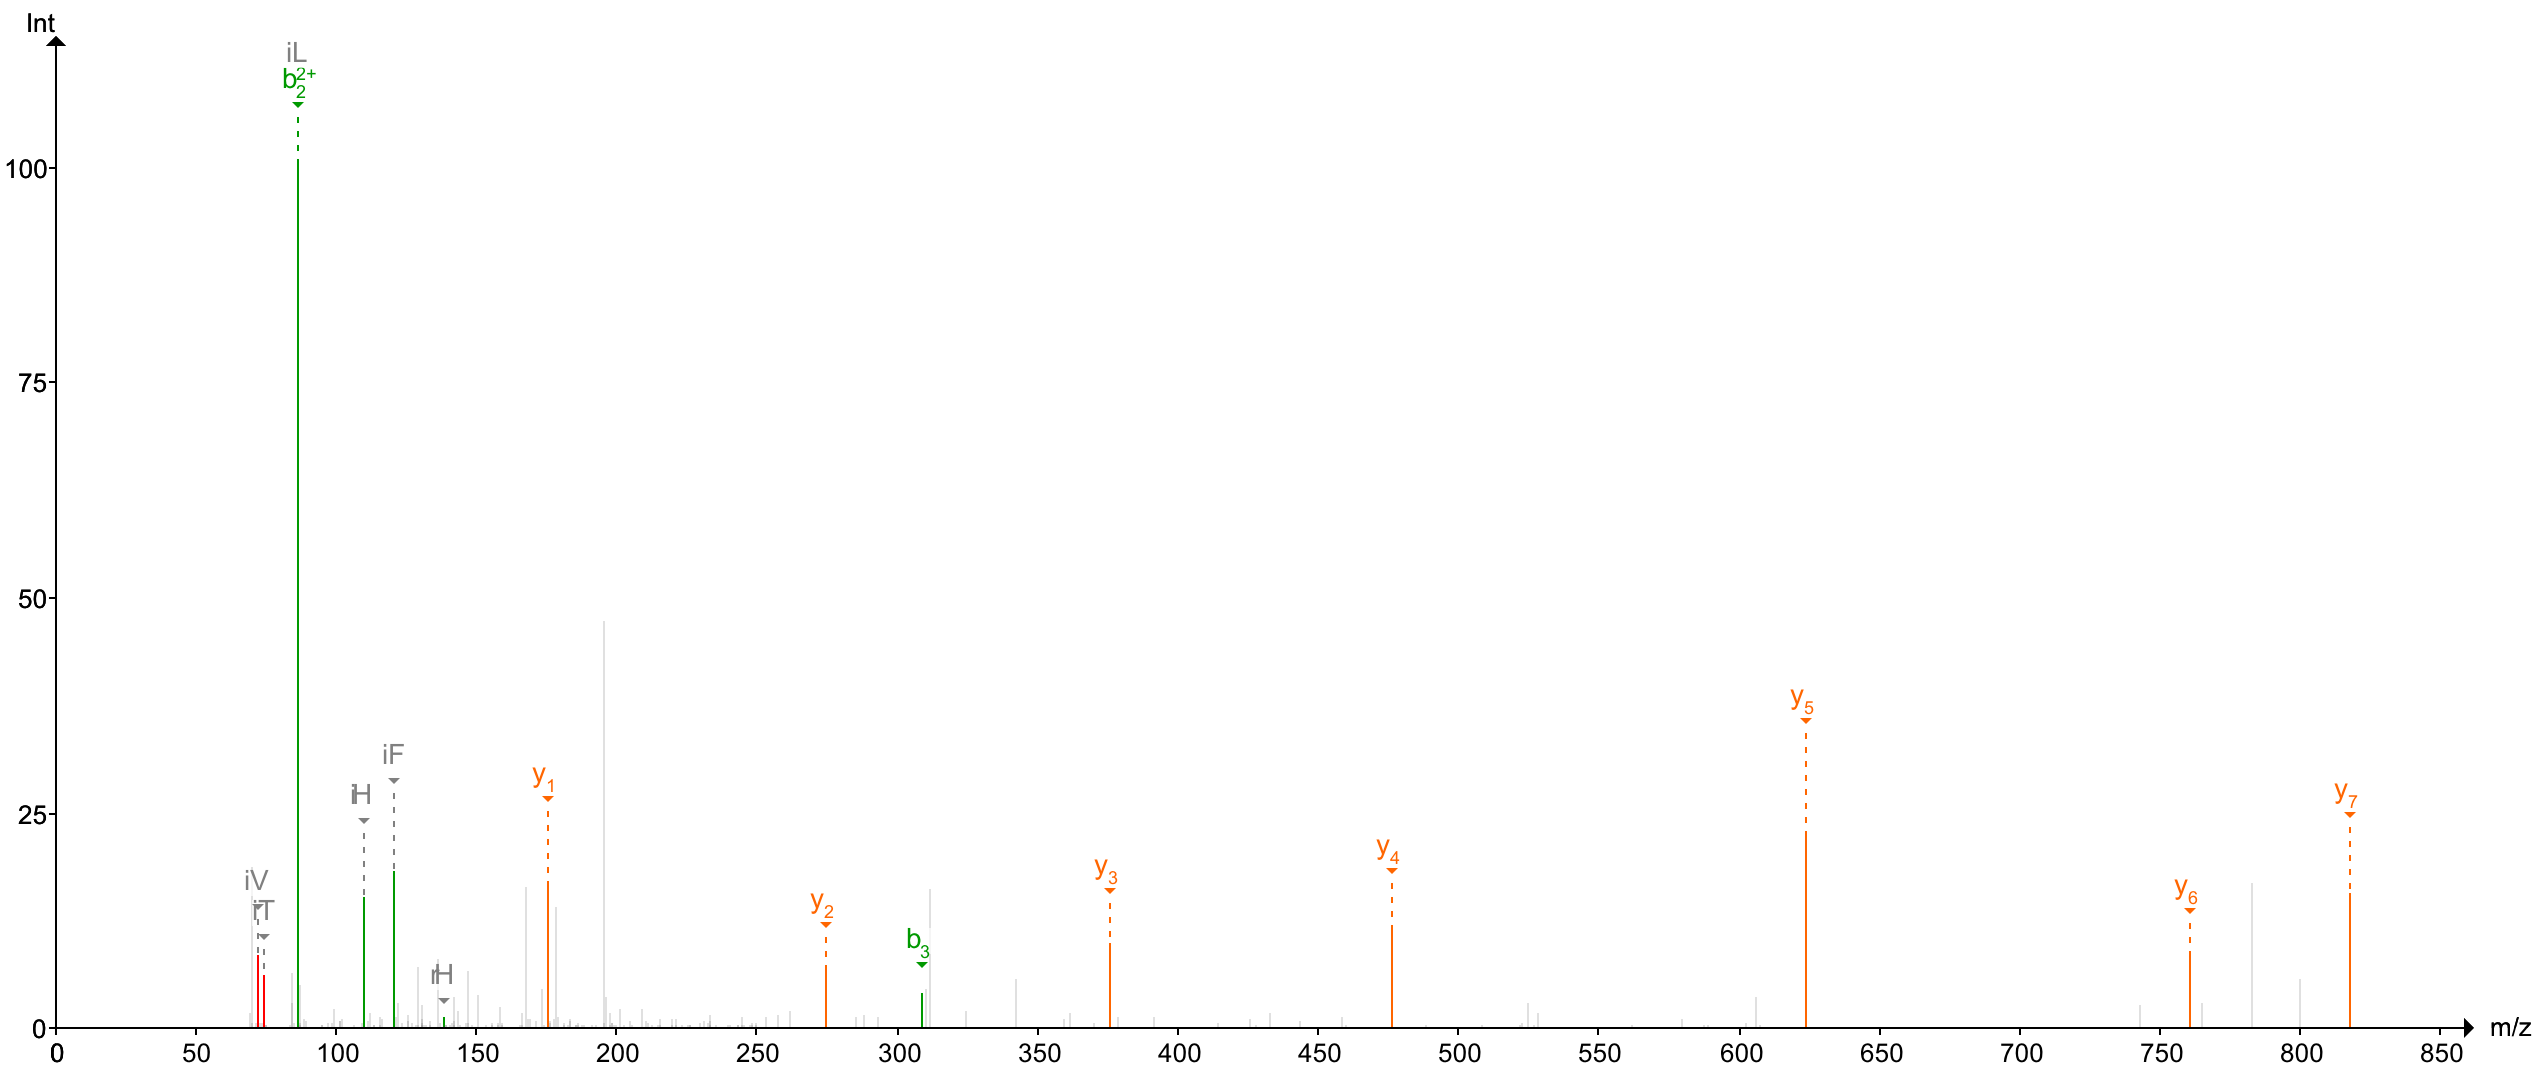

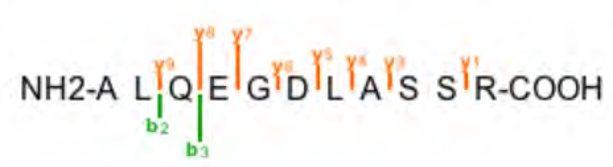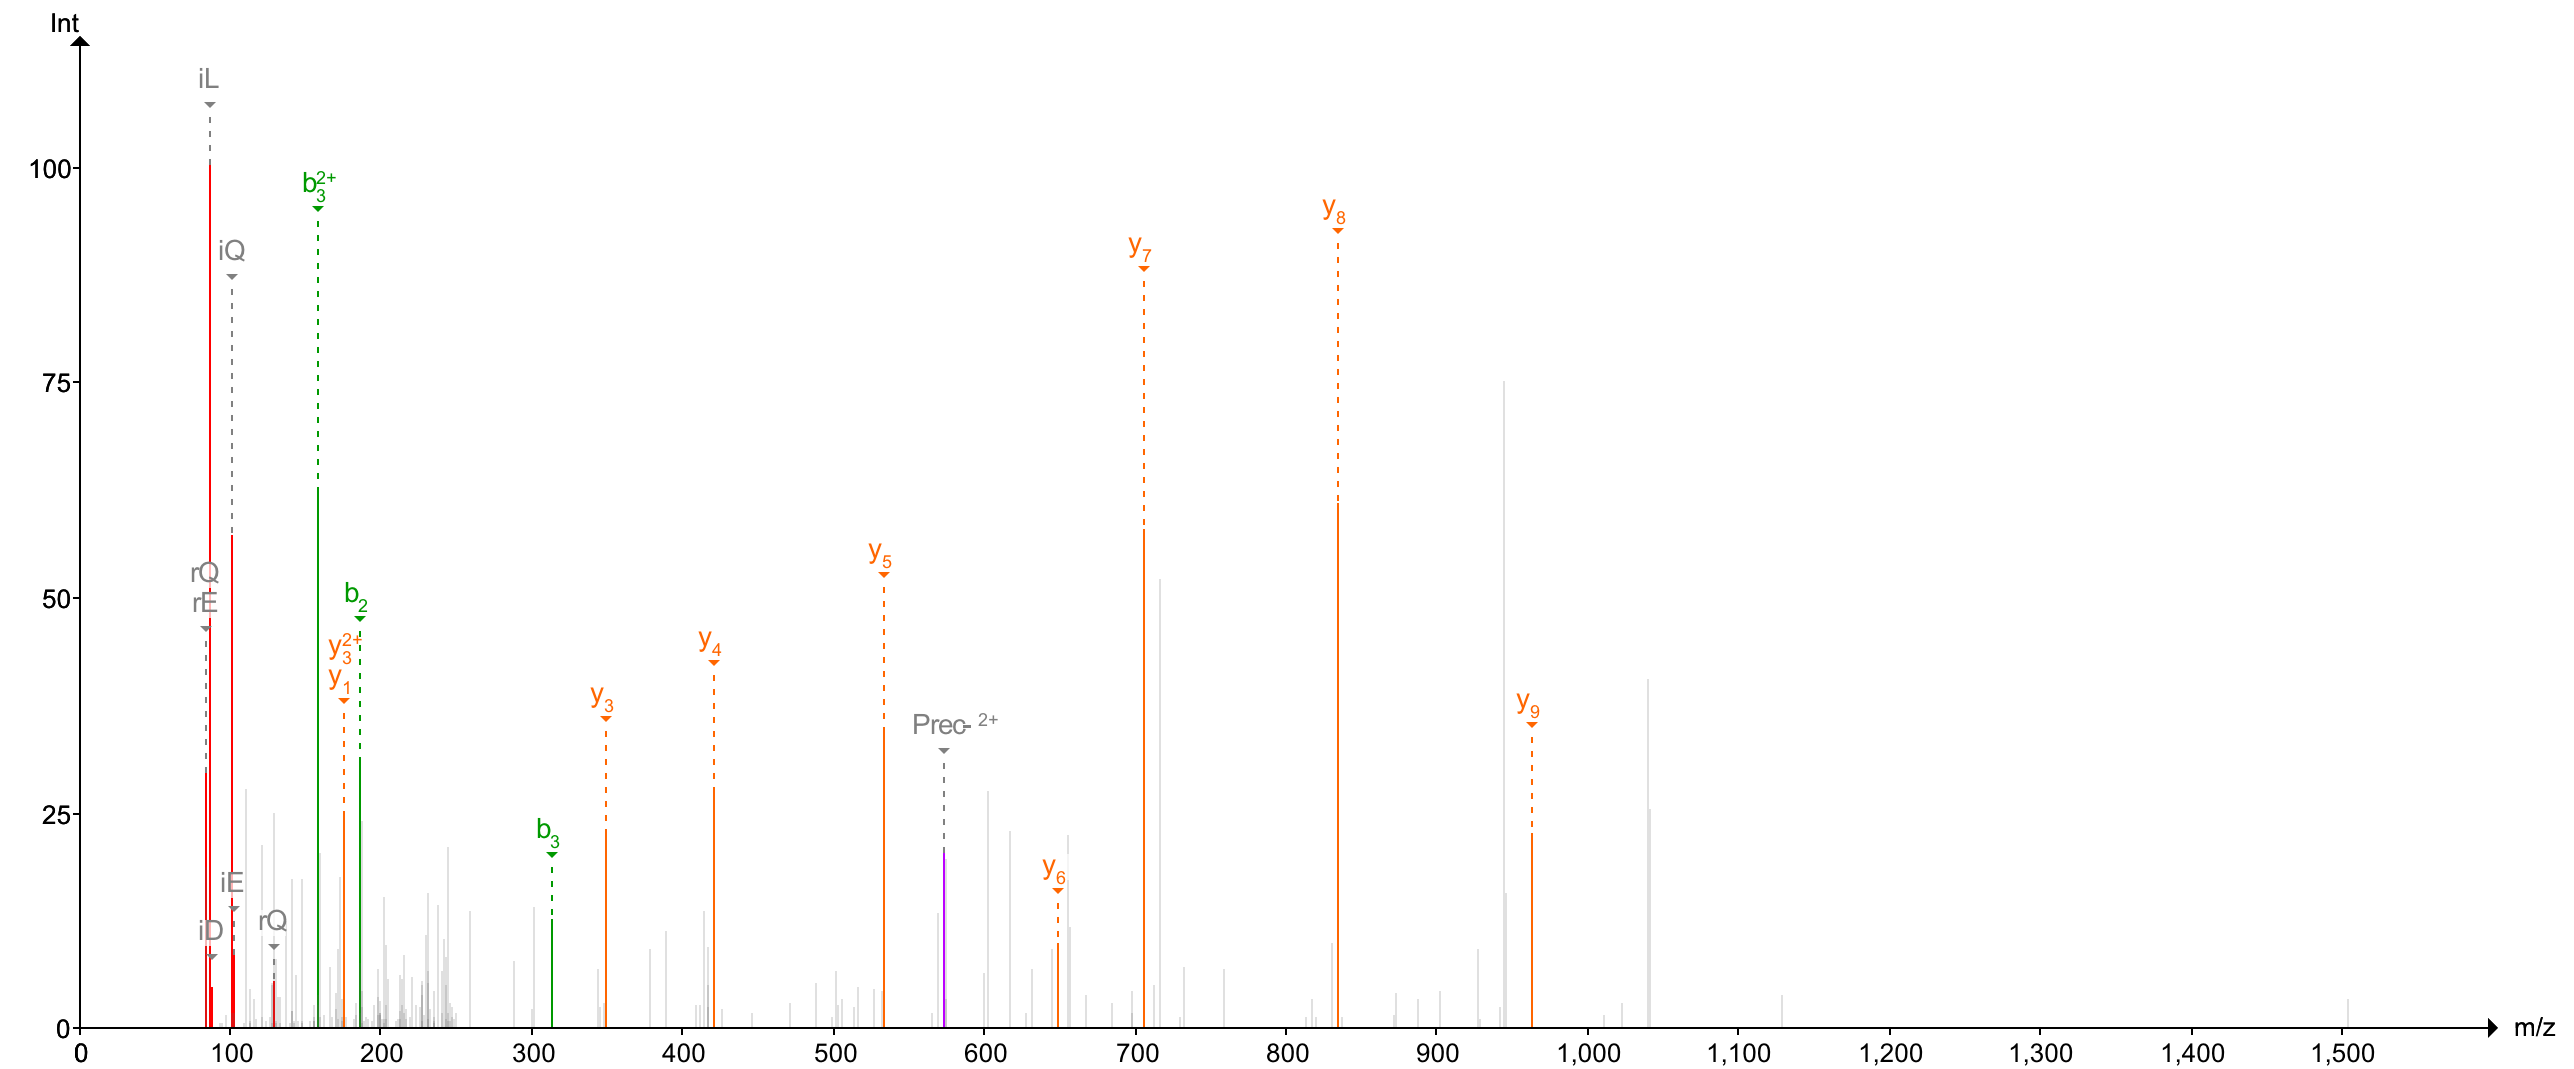

NH<sub>2</sub>-L G A A A P E E E S A Y V A G E K-COOH

b<sub>2</sub> b<sub>3</sub> b<sub>4</sub> y<sub>12</sub> y<sub>11</sub> y<sub>10</sub> y<sub>9</sub> y<sub>8</sub> y<sub>7</sub> y<sub>6</sub> y<sub>5</sub> y<sub>4</sub> y<sub>3</sub> y<sub>2</sub> y<sub>1</sub>

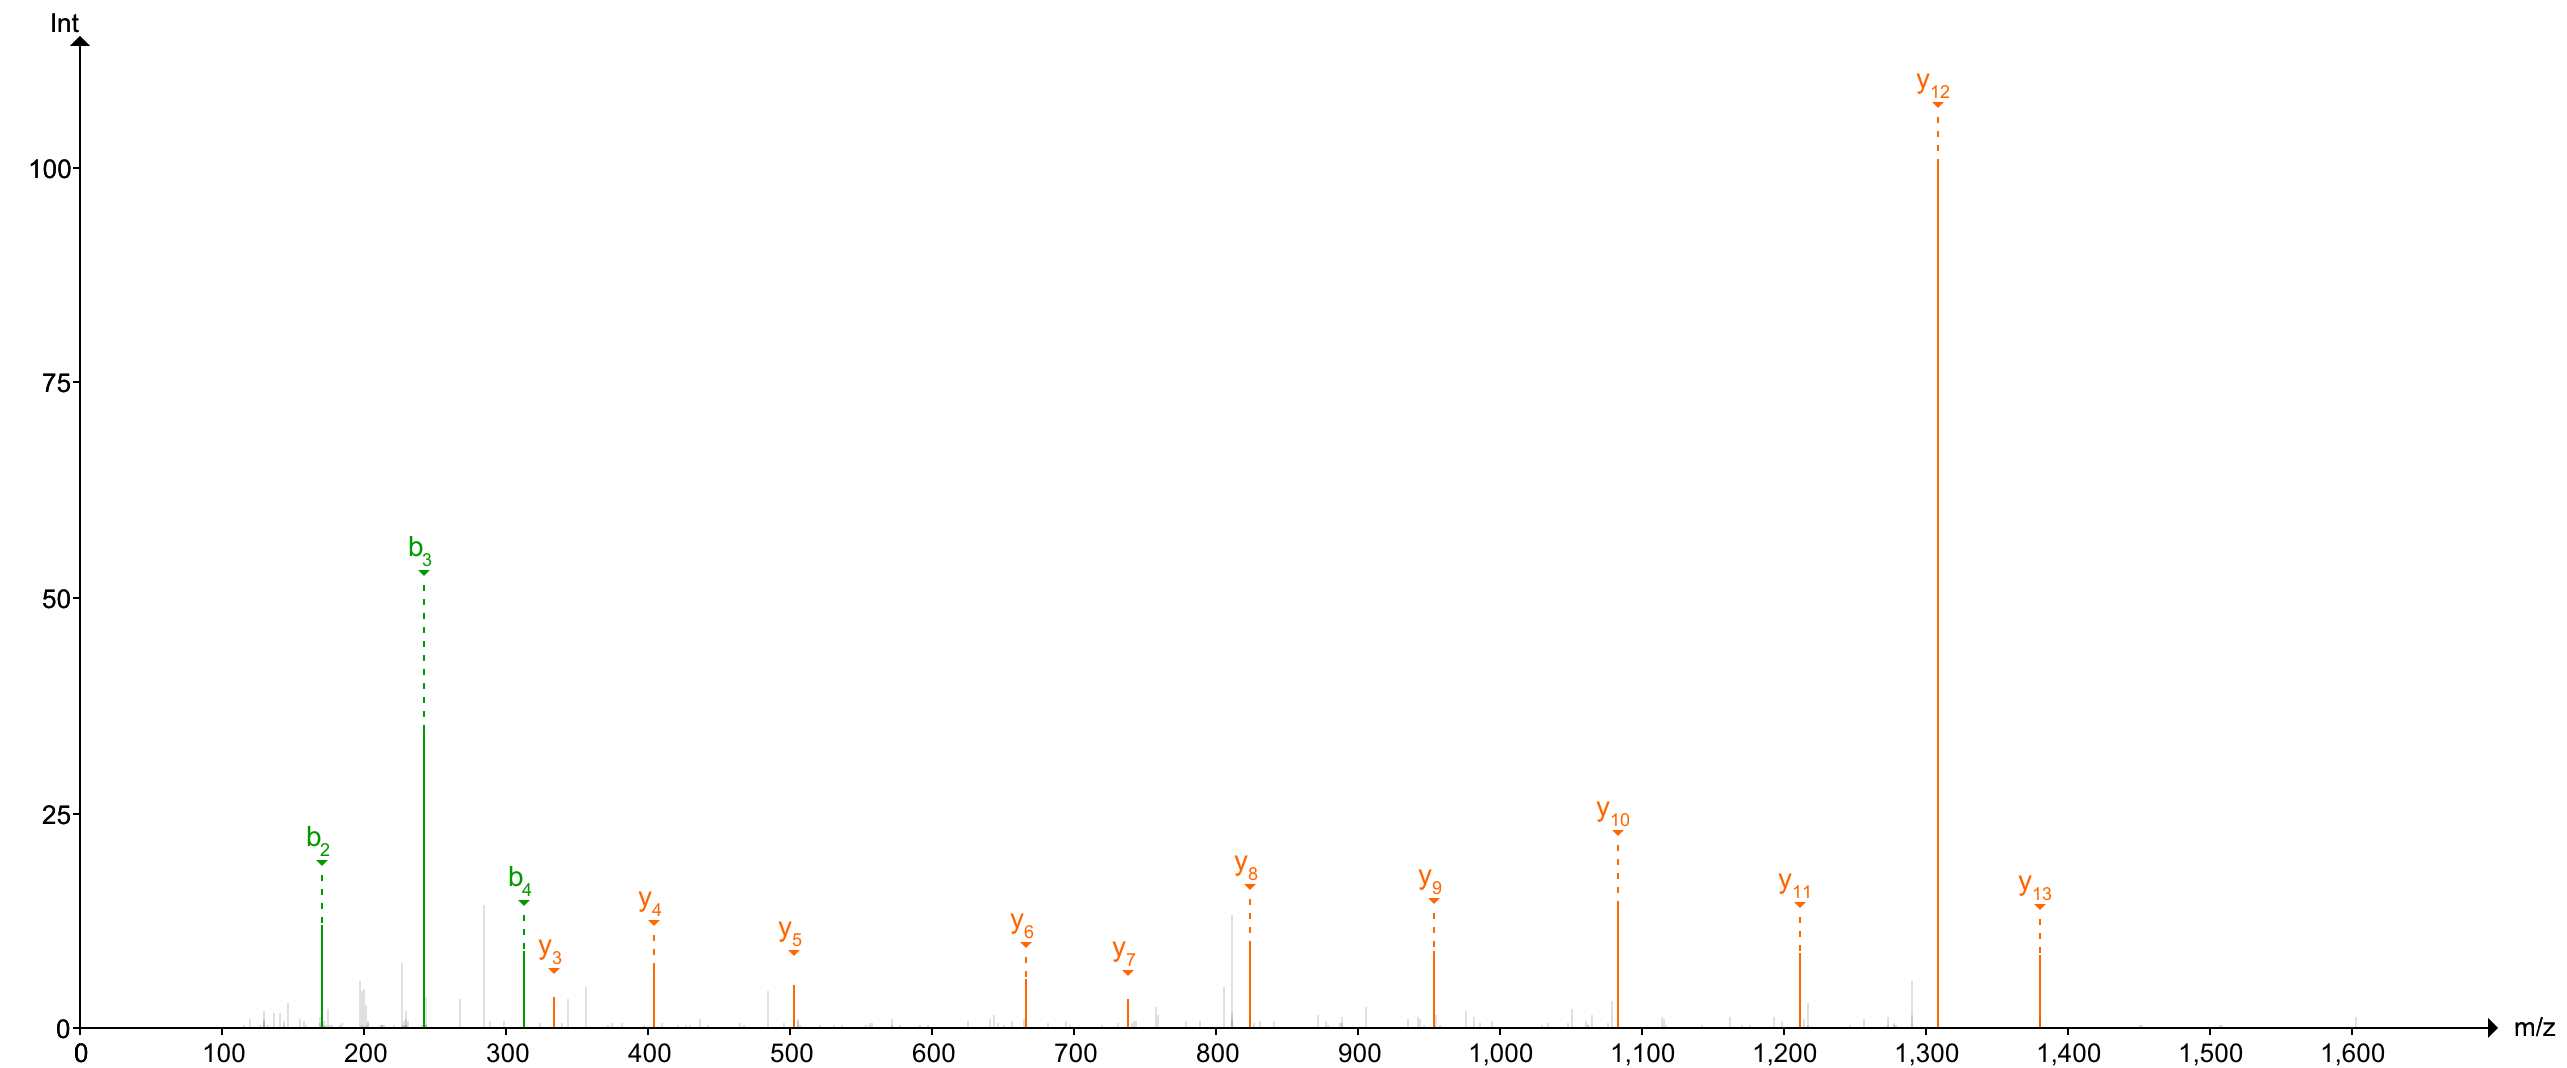

NH<sub>2</sub>-S G Y A I Q A D E E Q L R-COOH

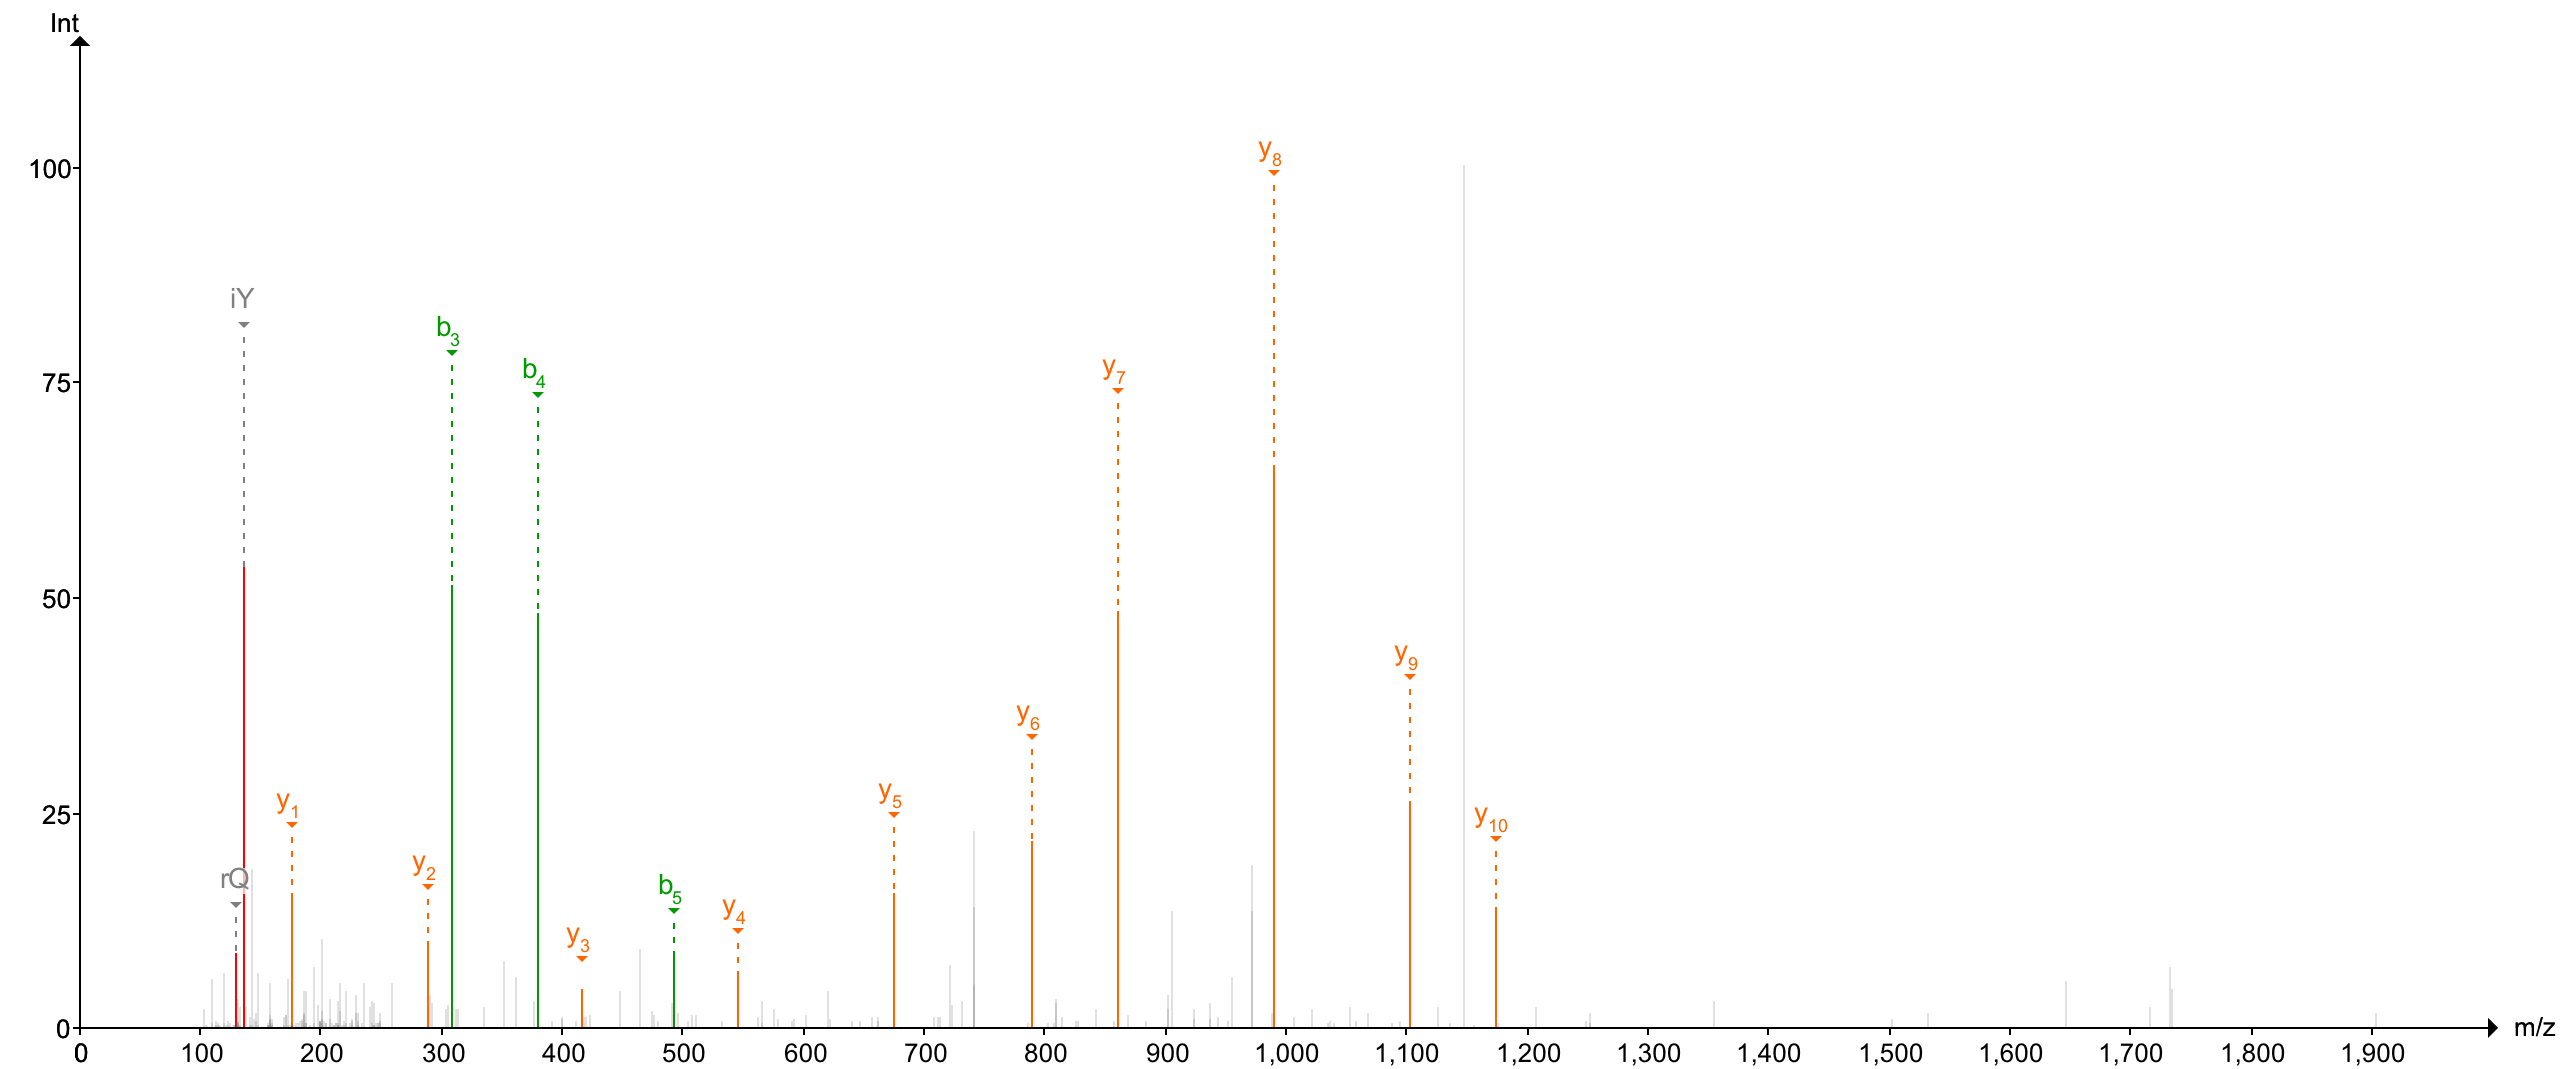

NH<sub>2</sub>-R W V T V G D T S L R-COOH

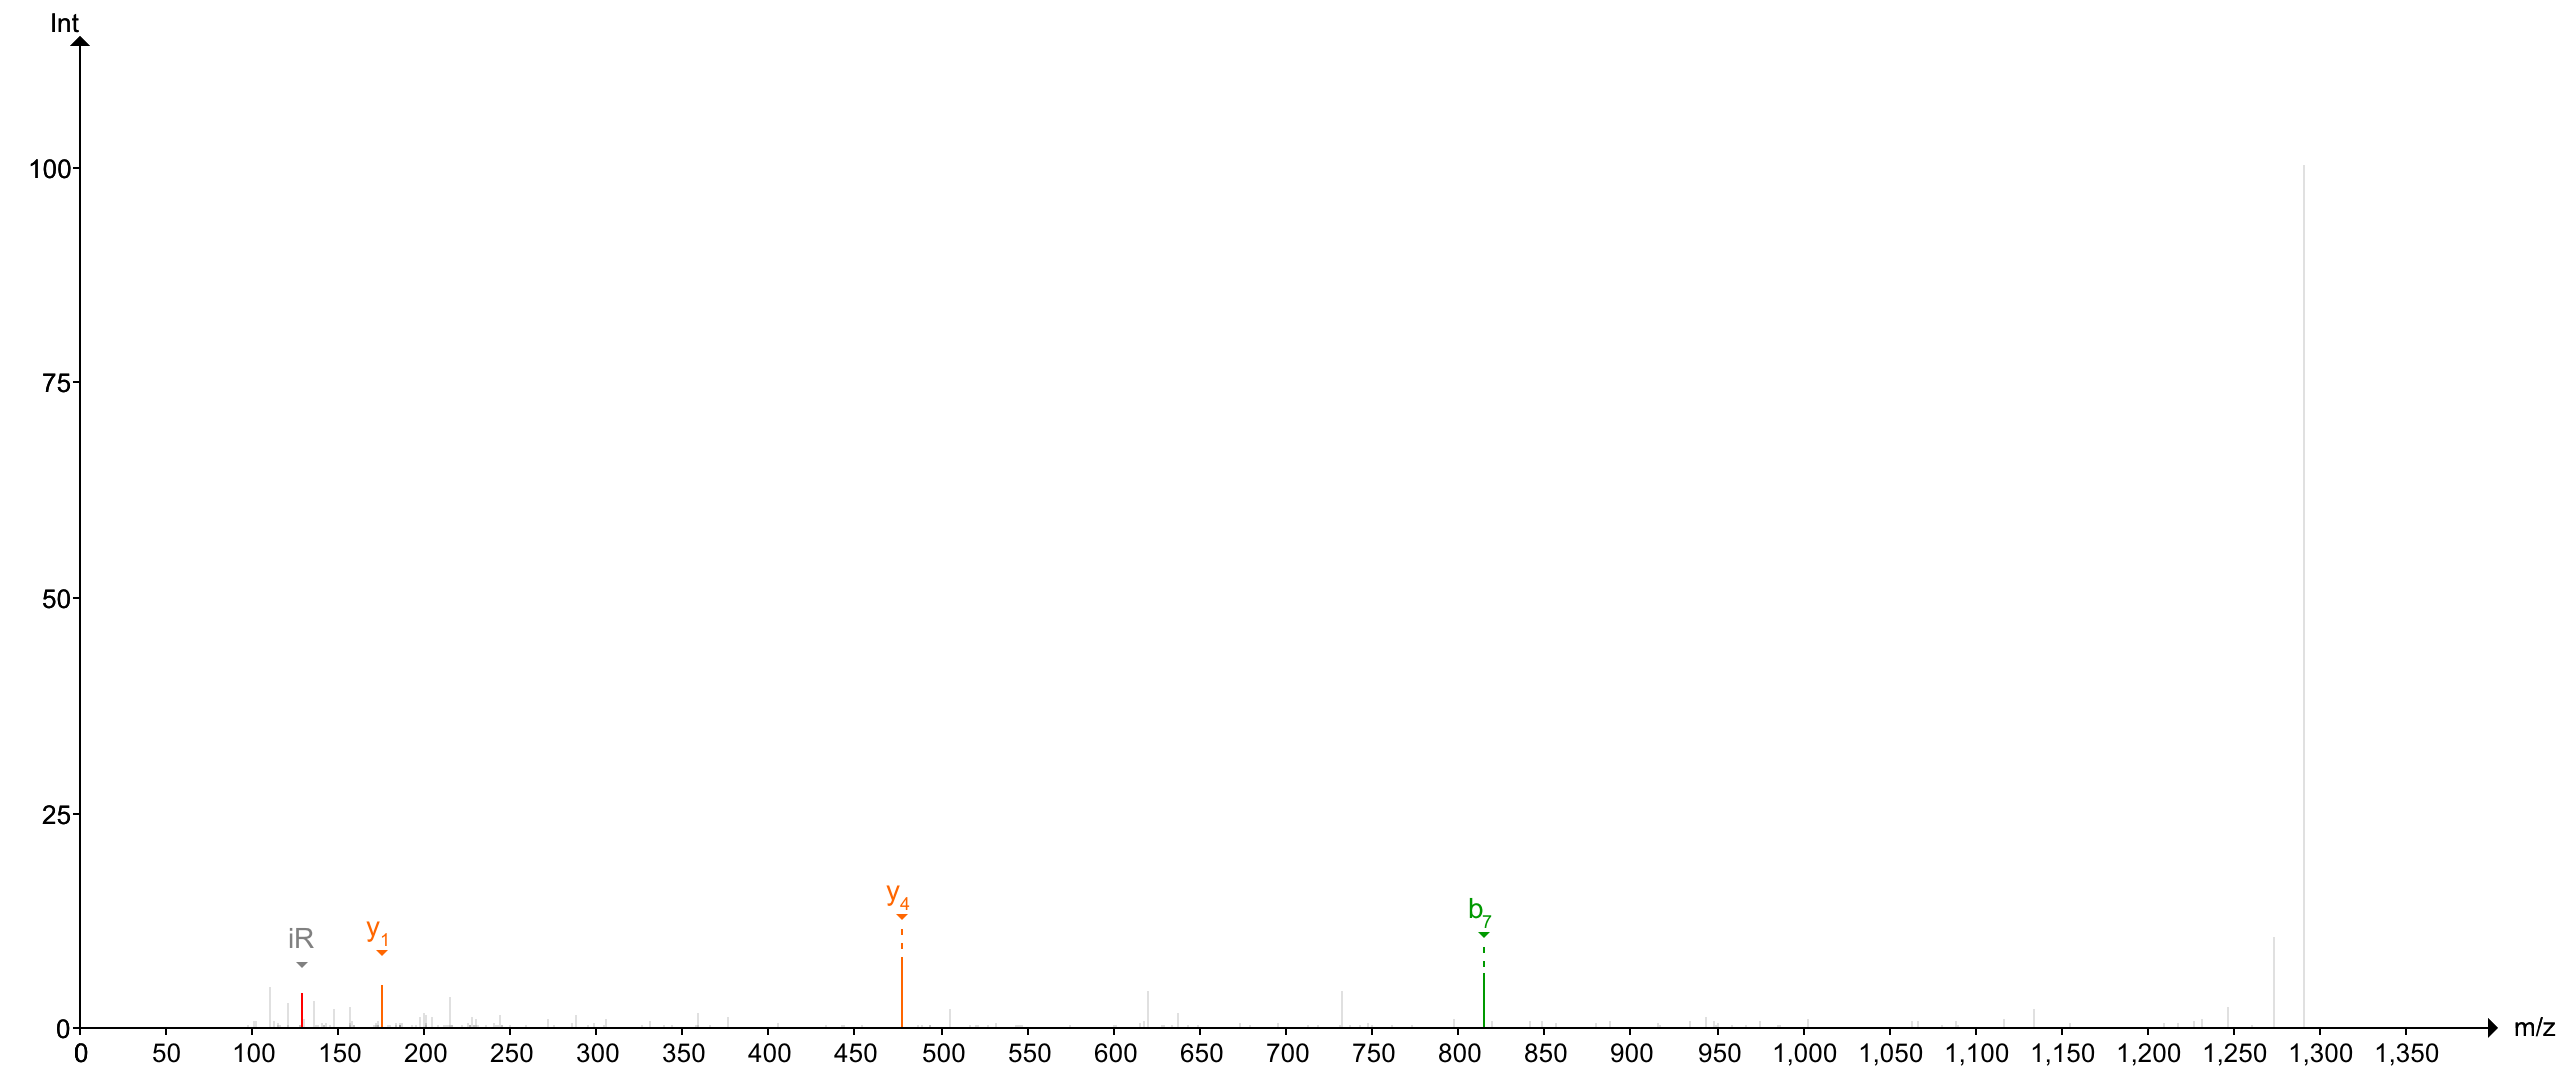

NH<sub>2</sub>-L L L P H A F S R-COOH

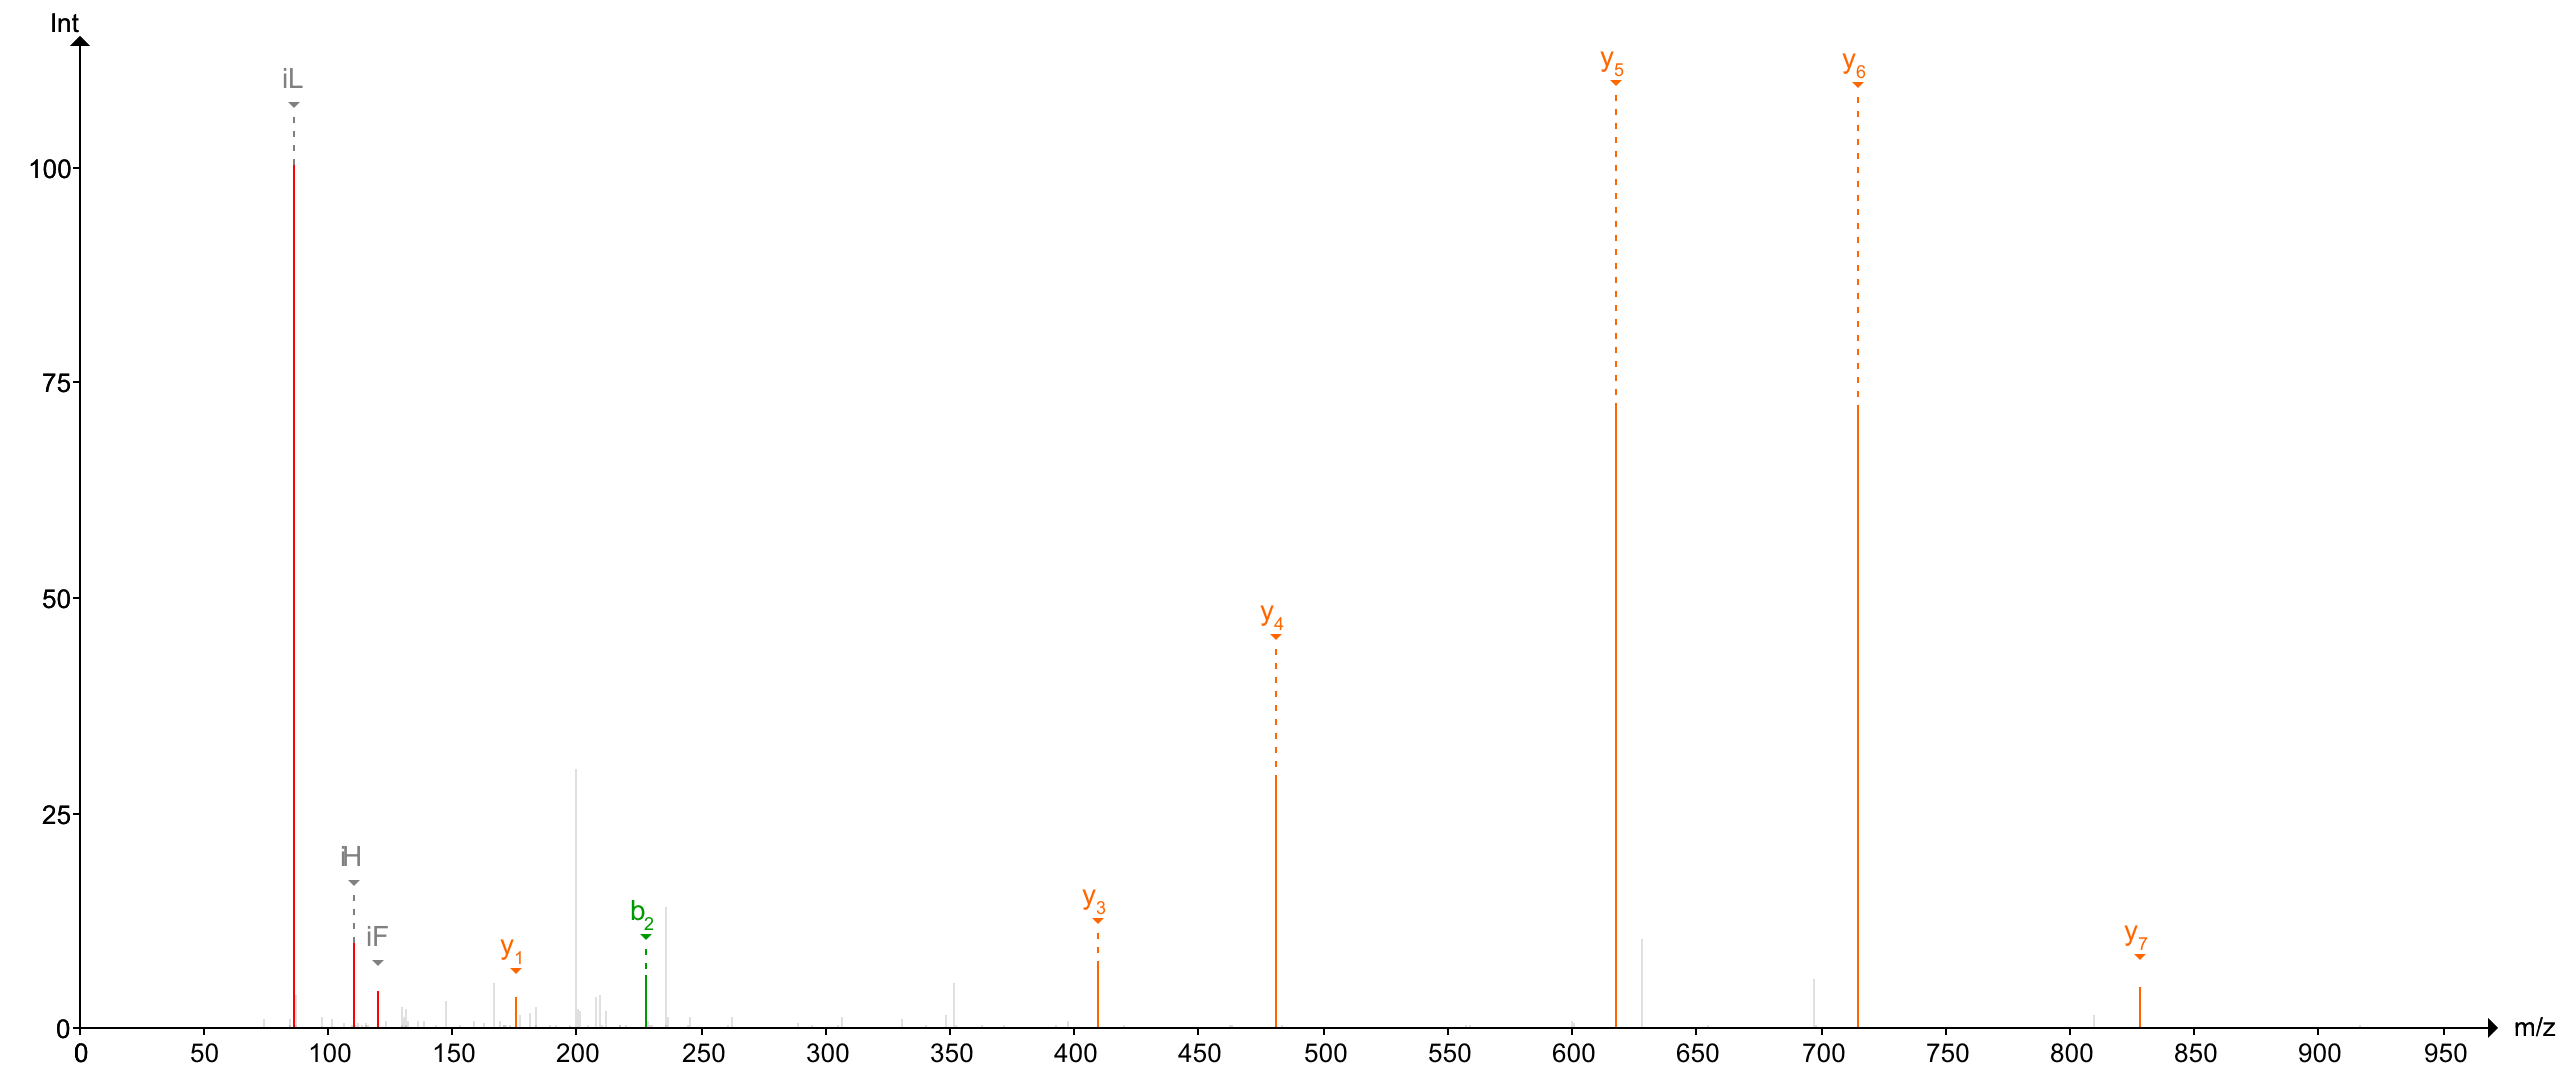

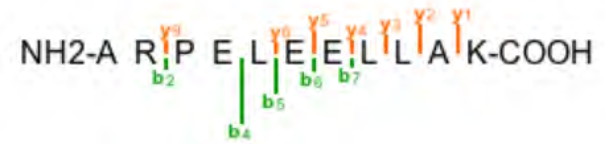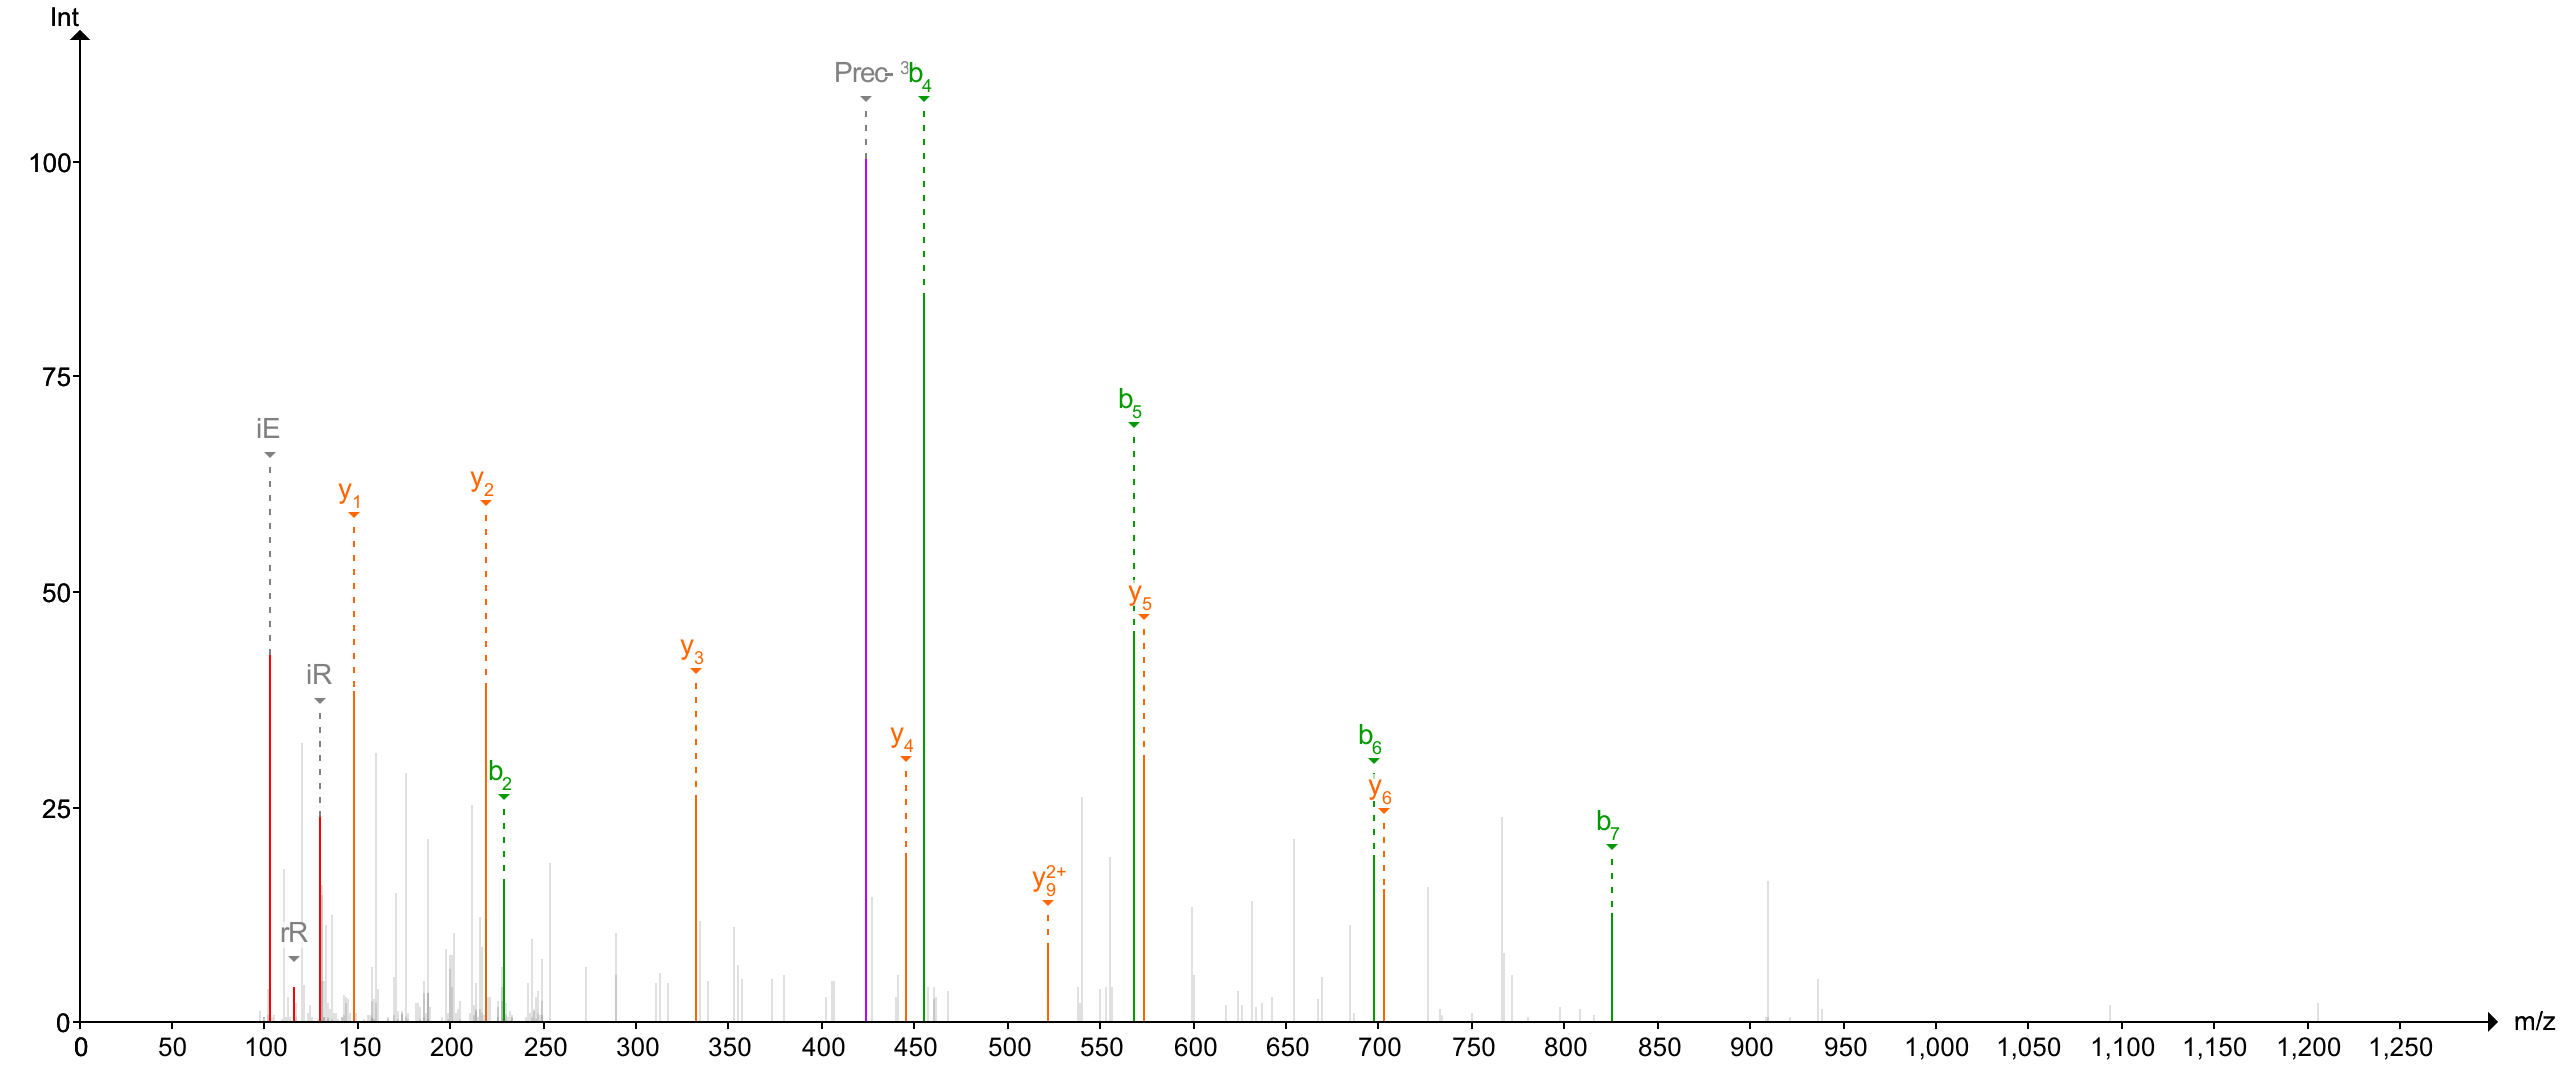

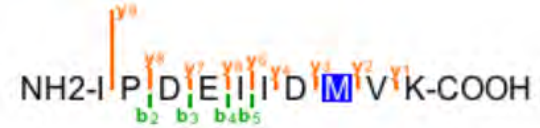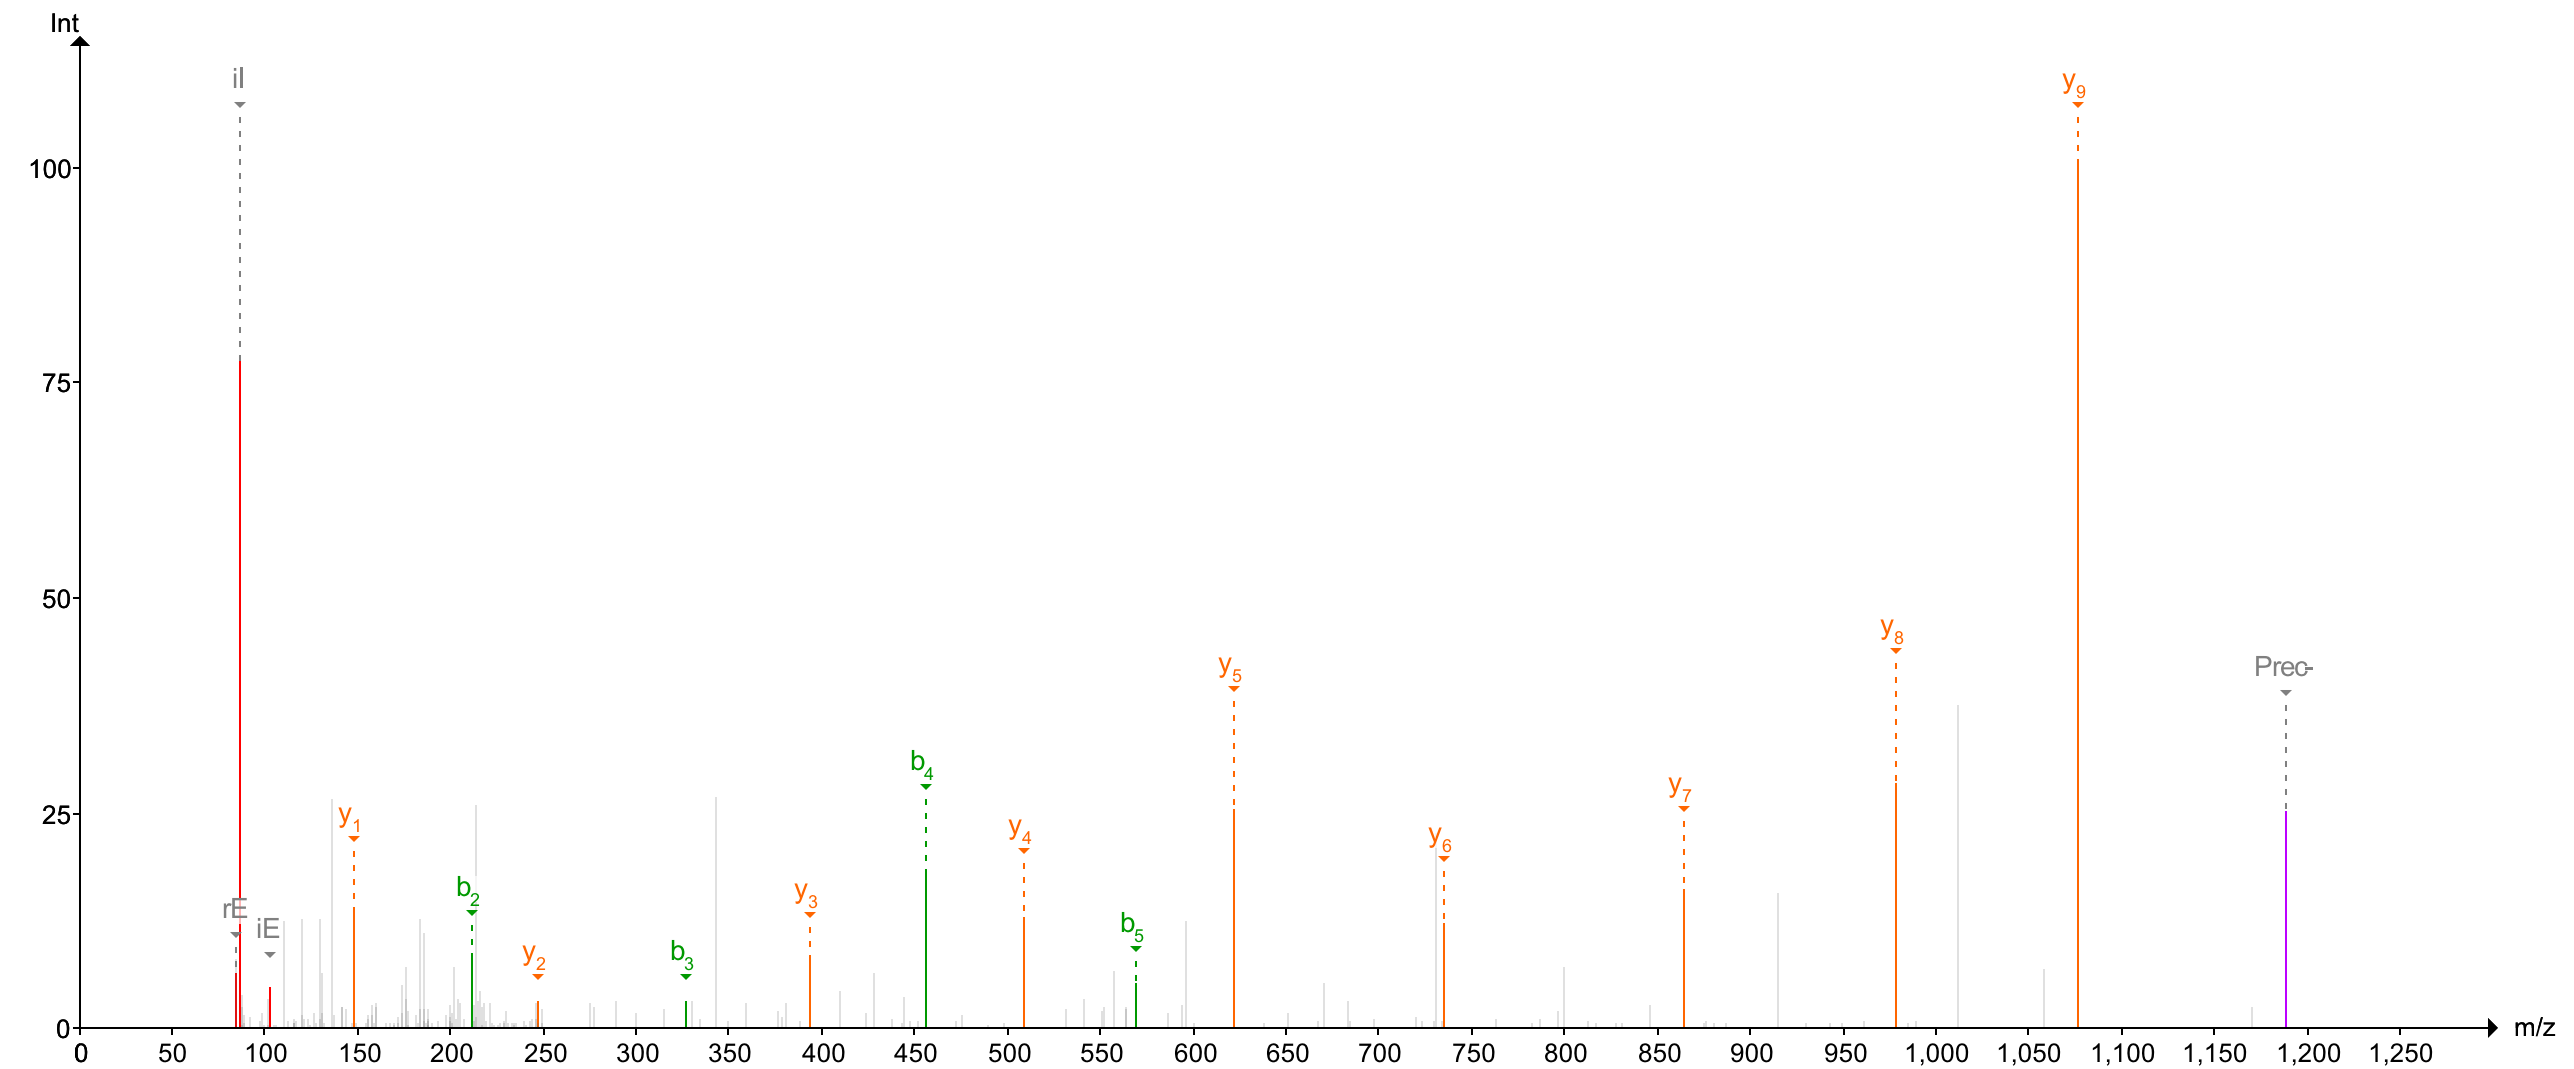



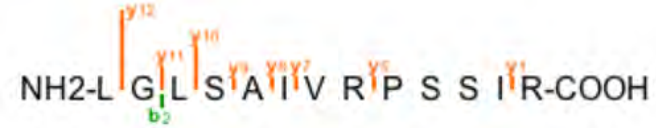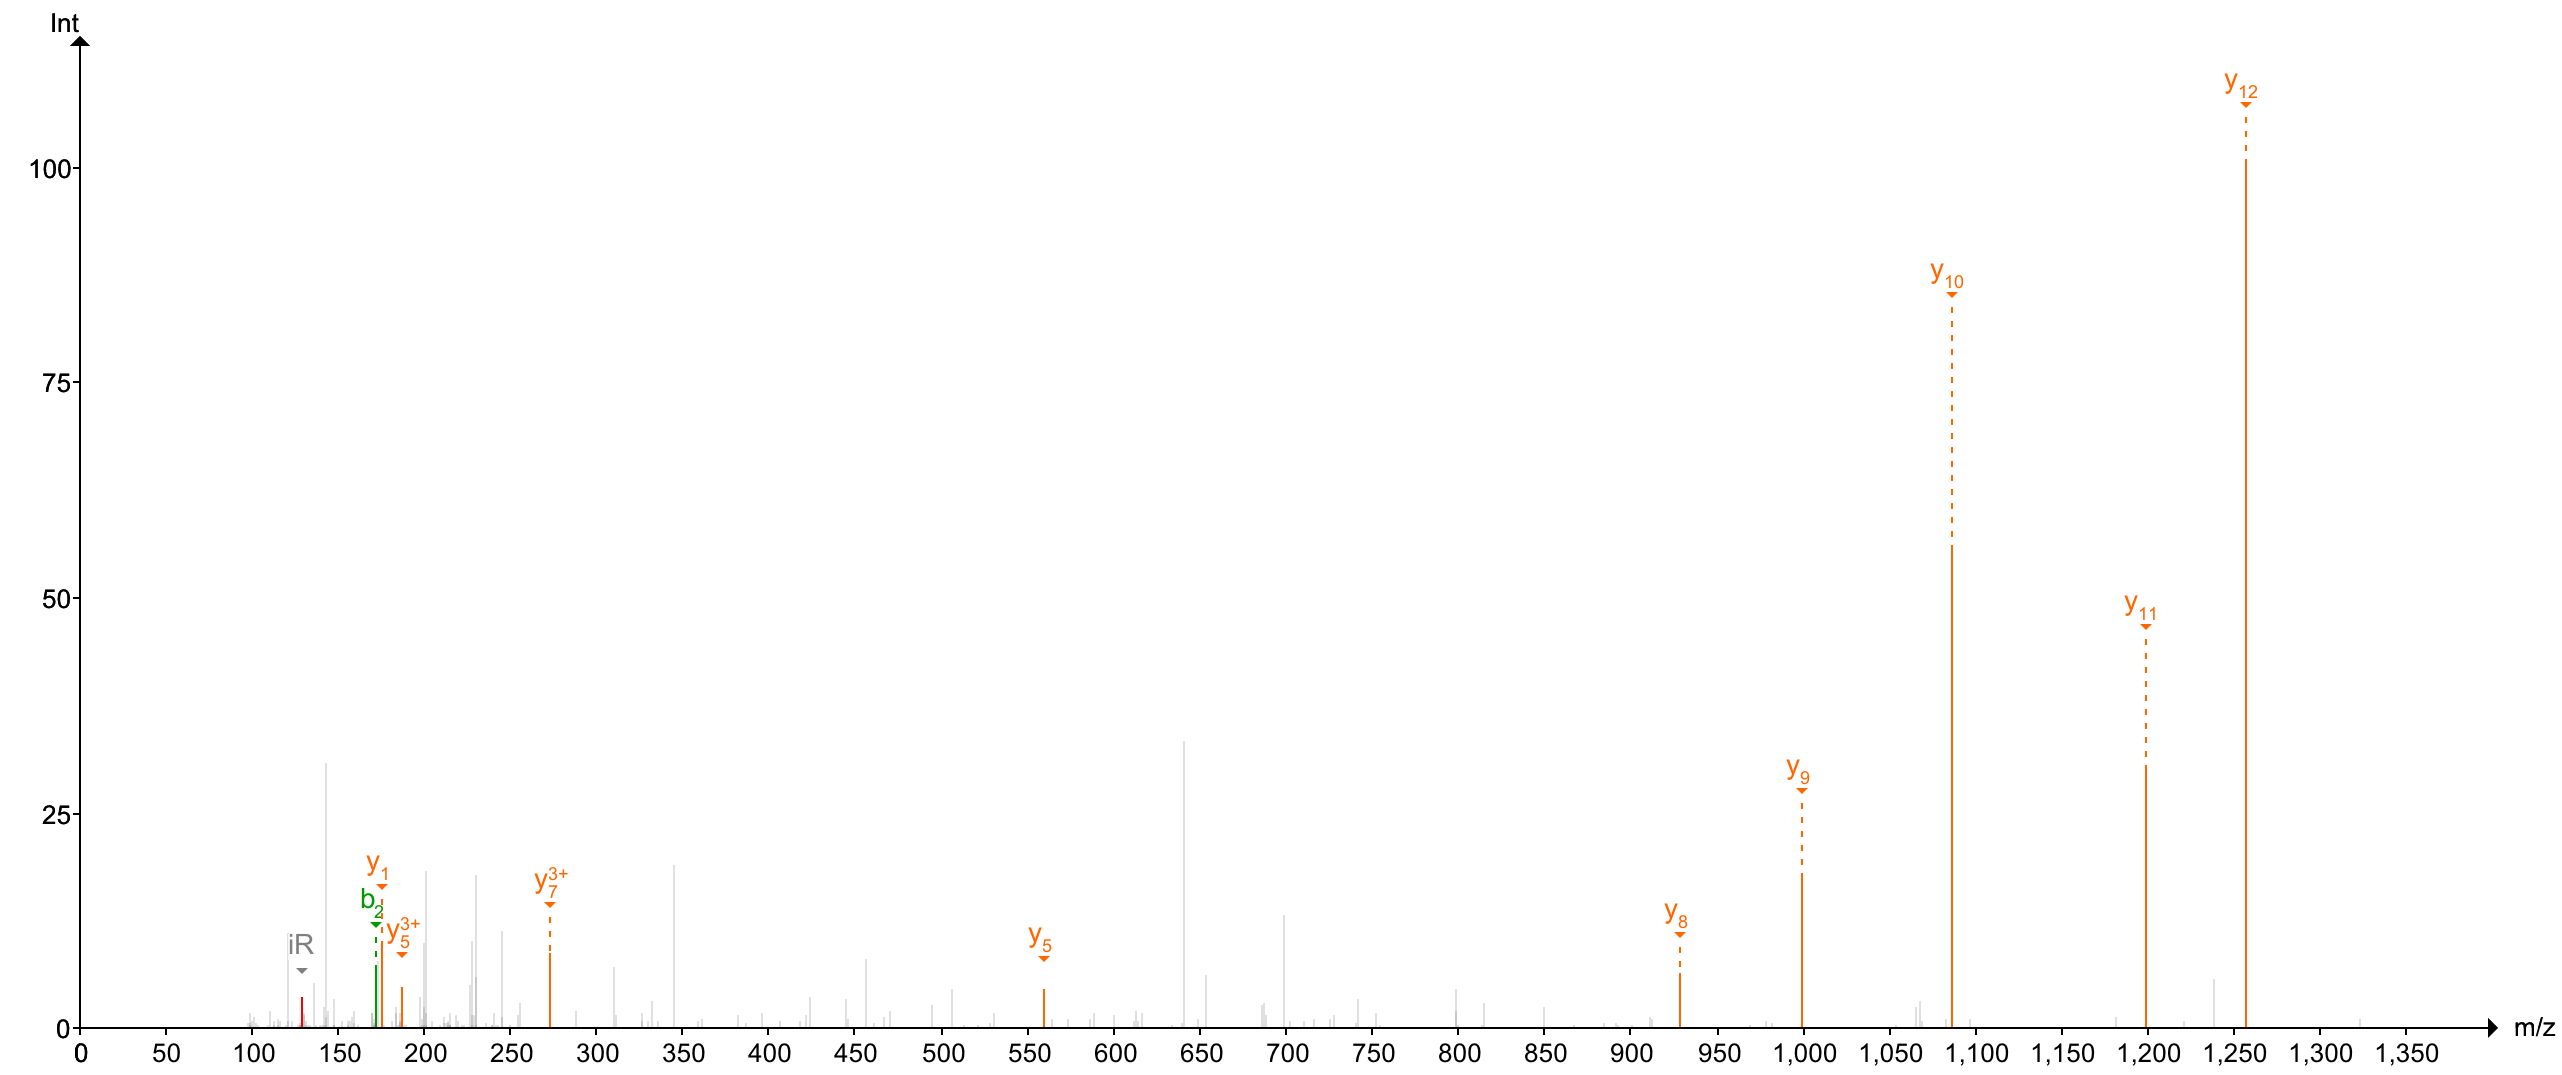

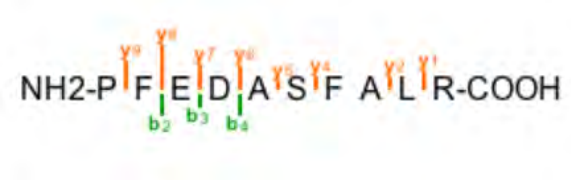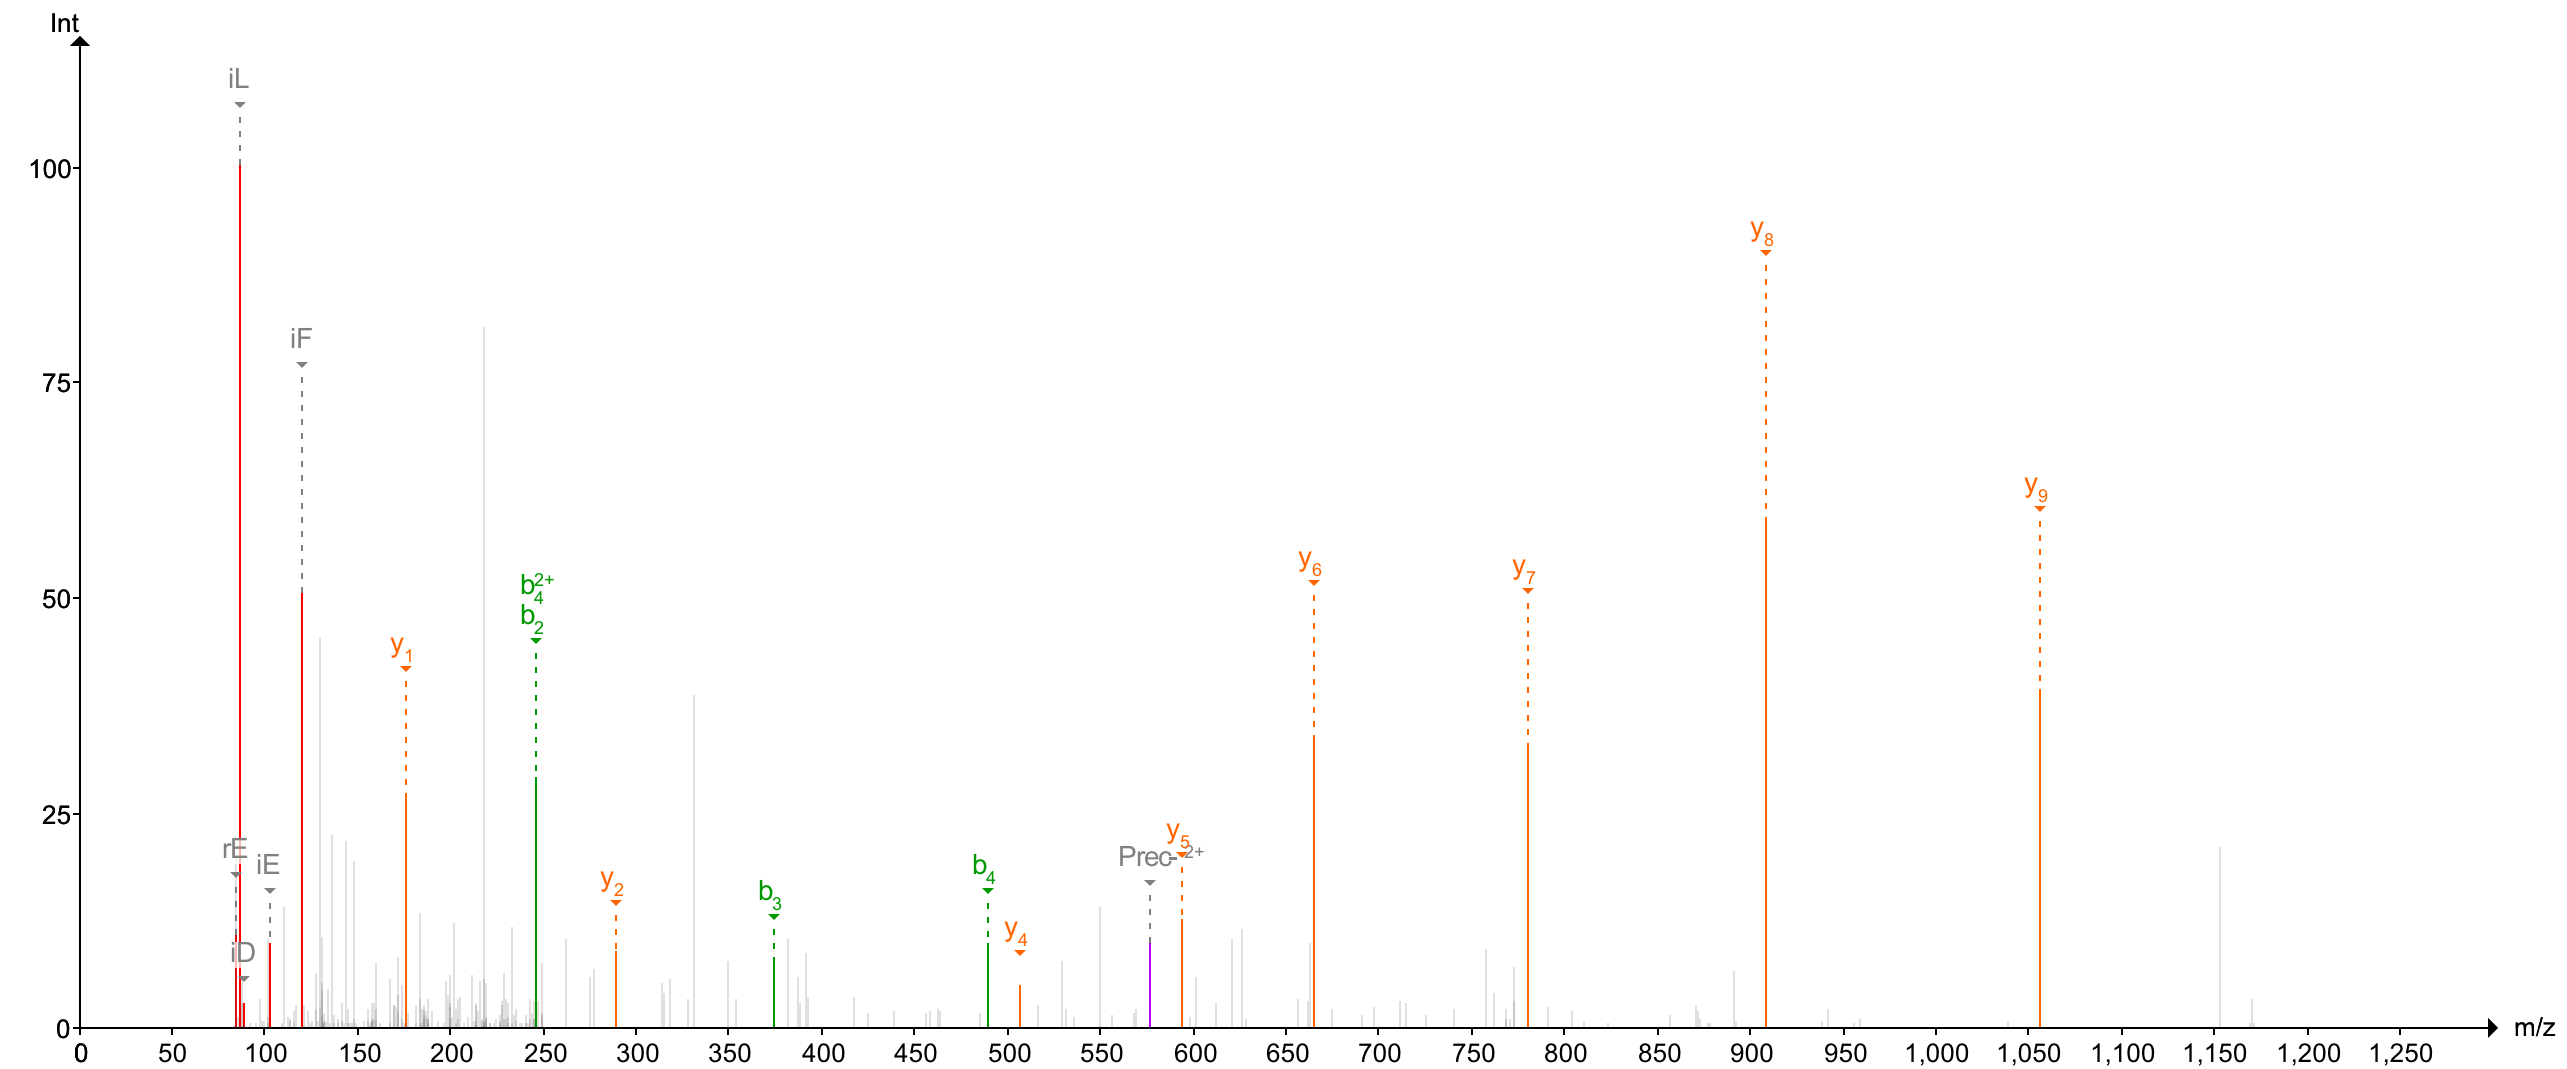

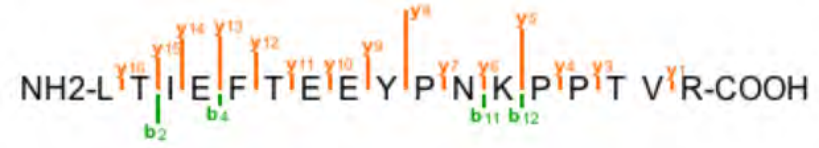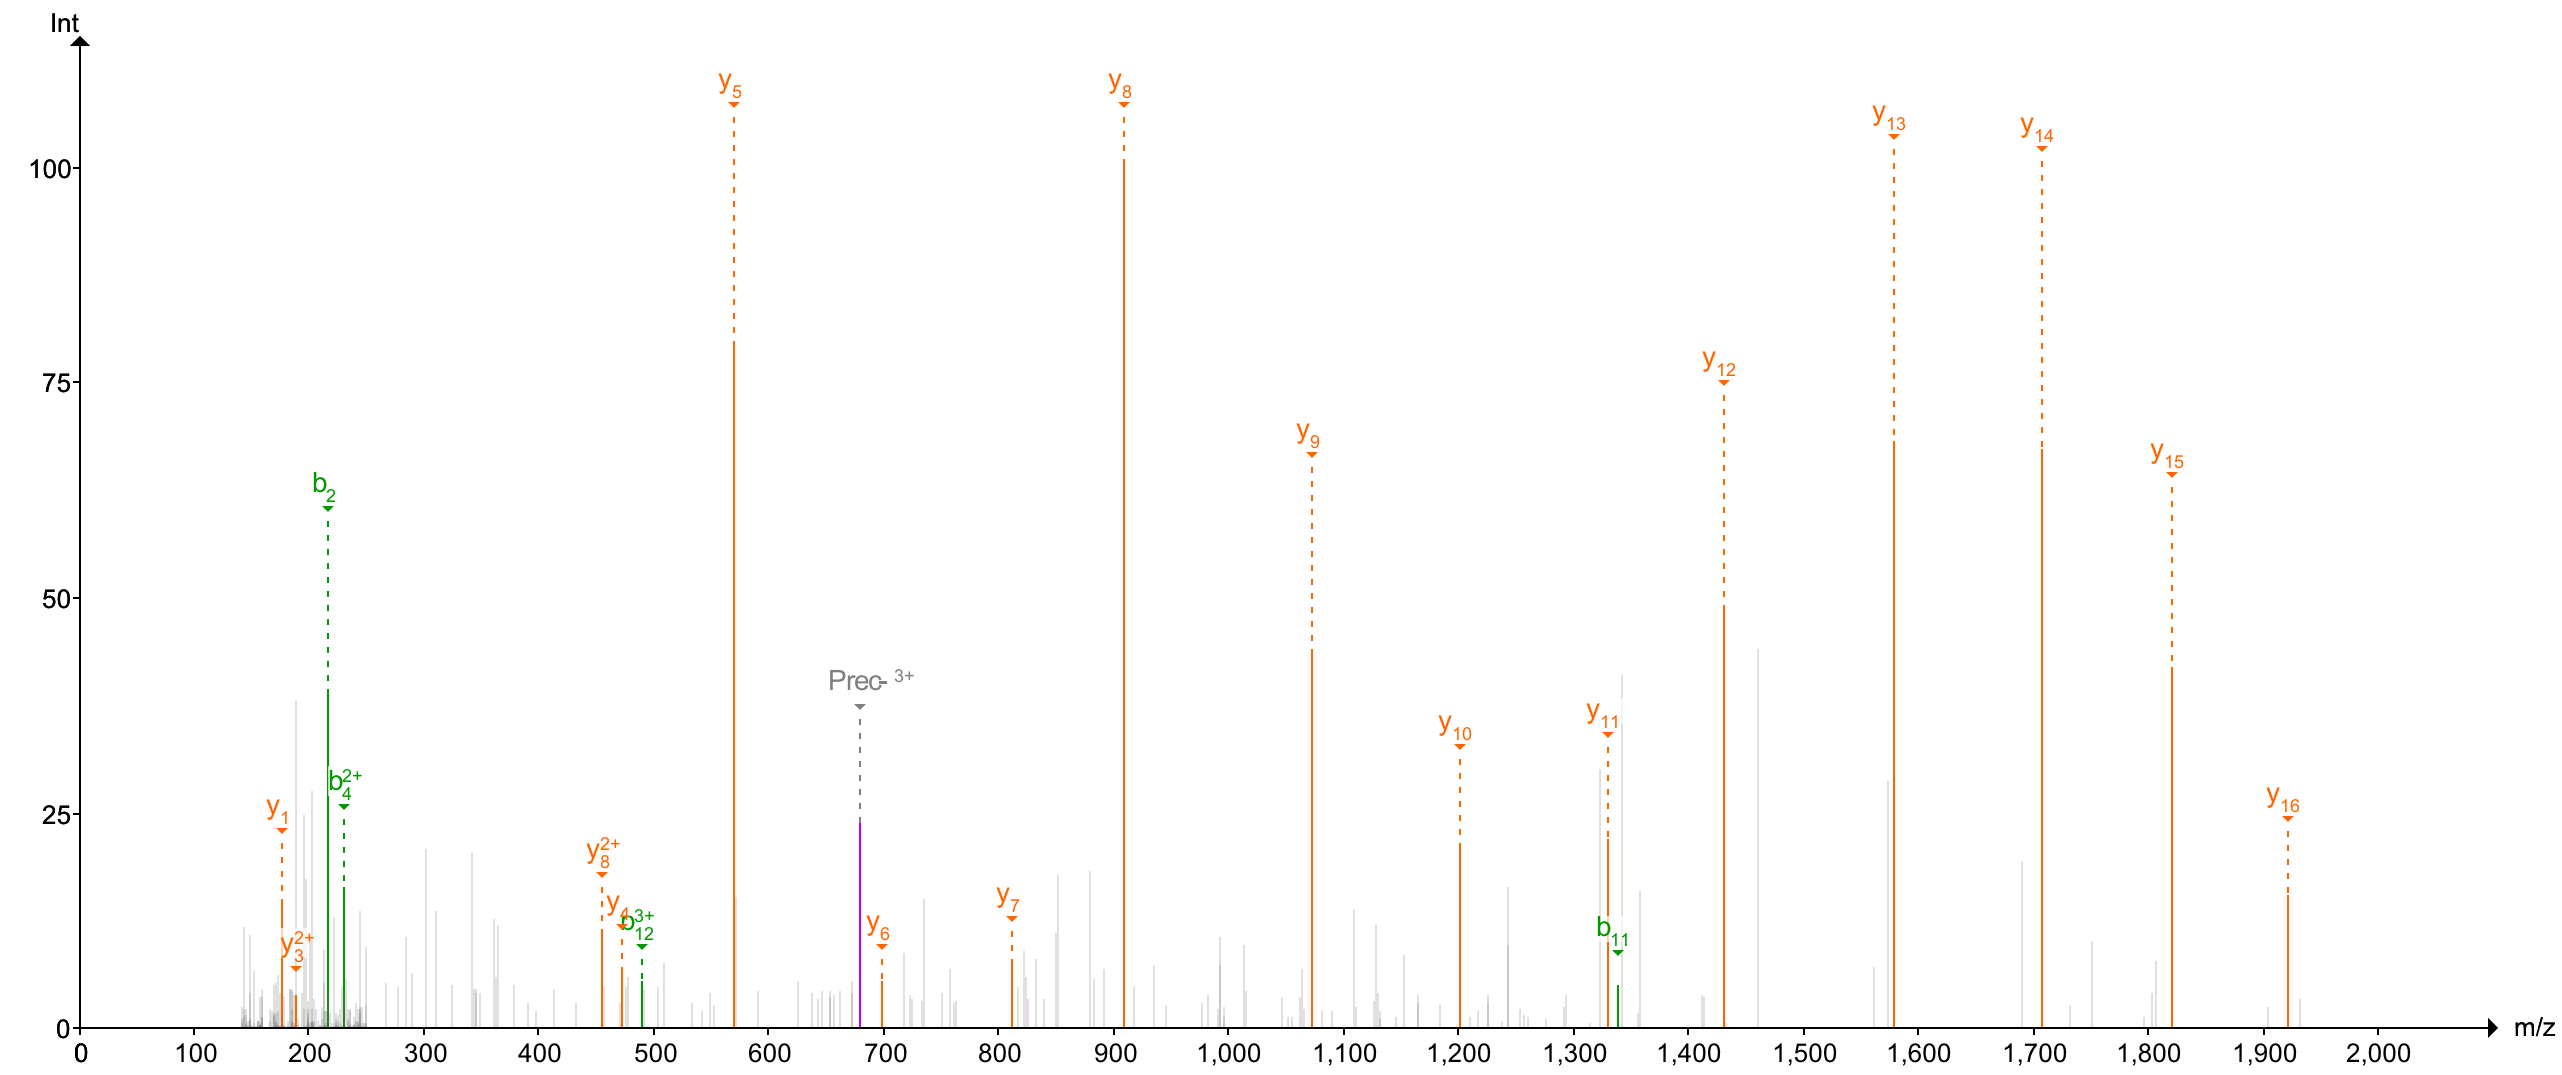

NH<sub>2</sub>-V S<sub>1</sub>E<sub>2</sub>G<sub>3</sub>G<sub>4</sub>P<sub>5</sub>A<sub>6</sub>E<sub>7</sub>I<sub>8</sub>A<sub>9</sub>G<sub>10</sub>L<sub>11</sub>Q<sub>12</sub>I<sub>13</sub>G<sub>14</sub>D<sub>15</sub>K-COOH

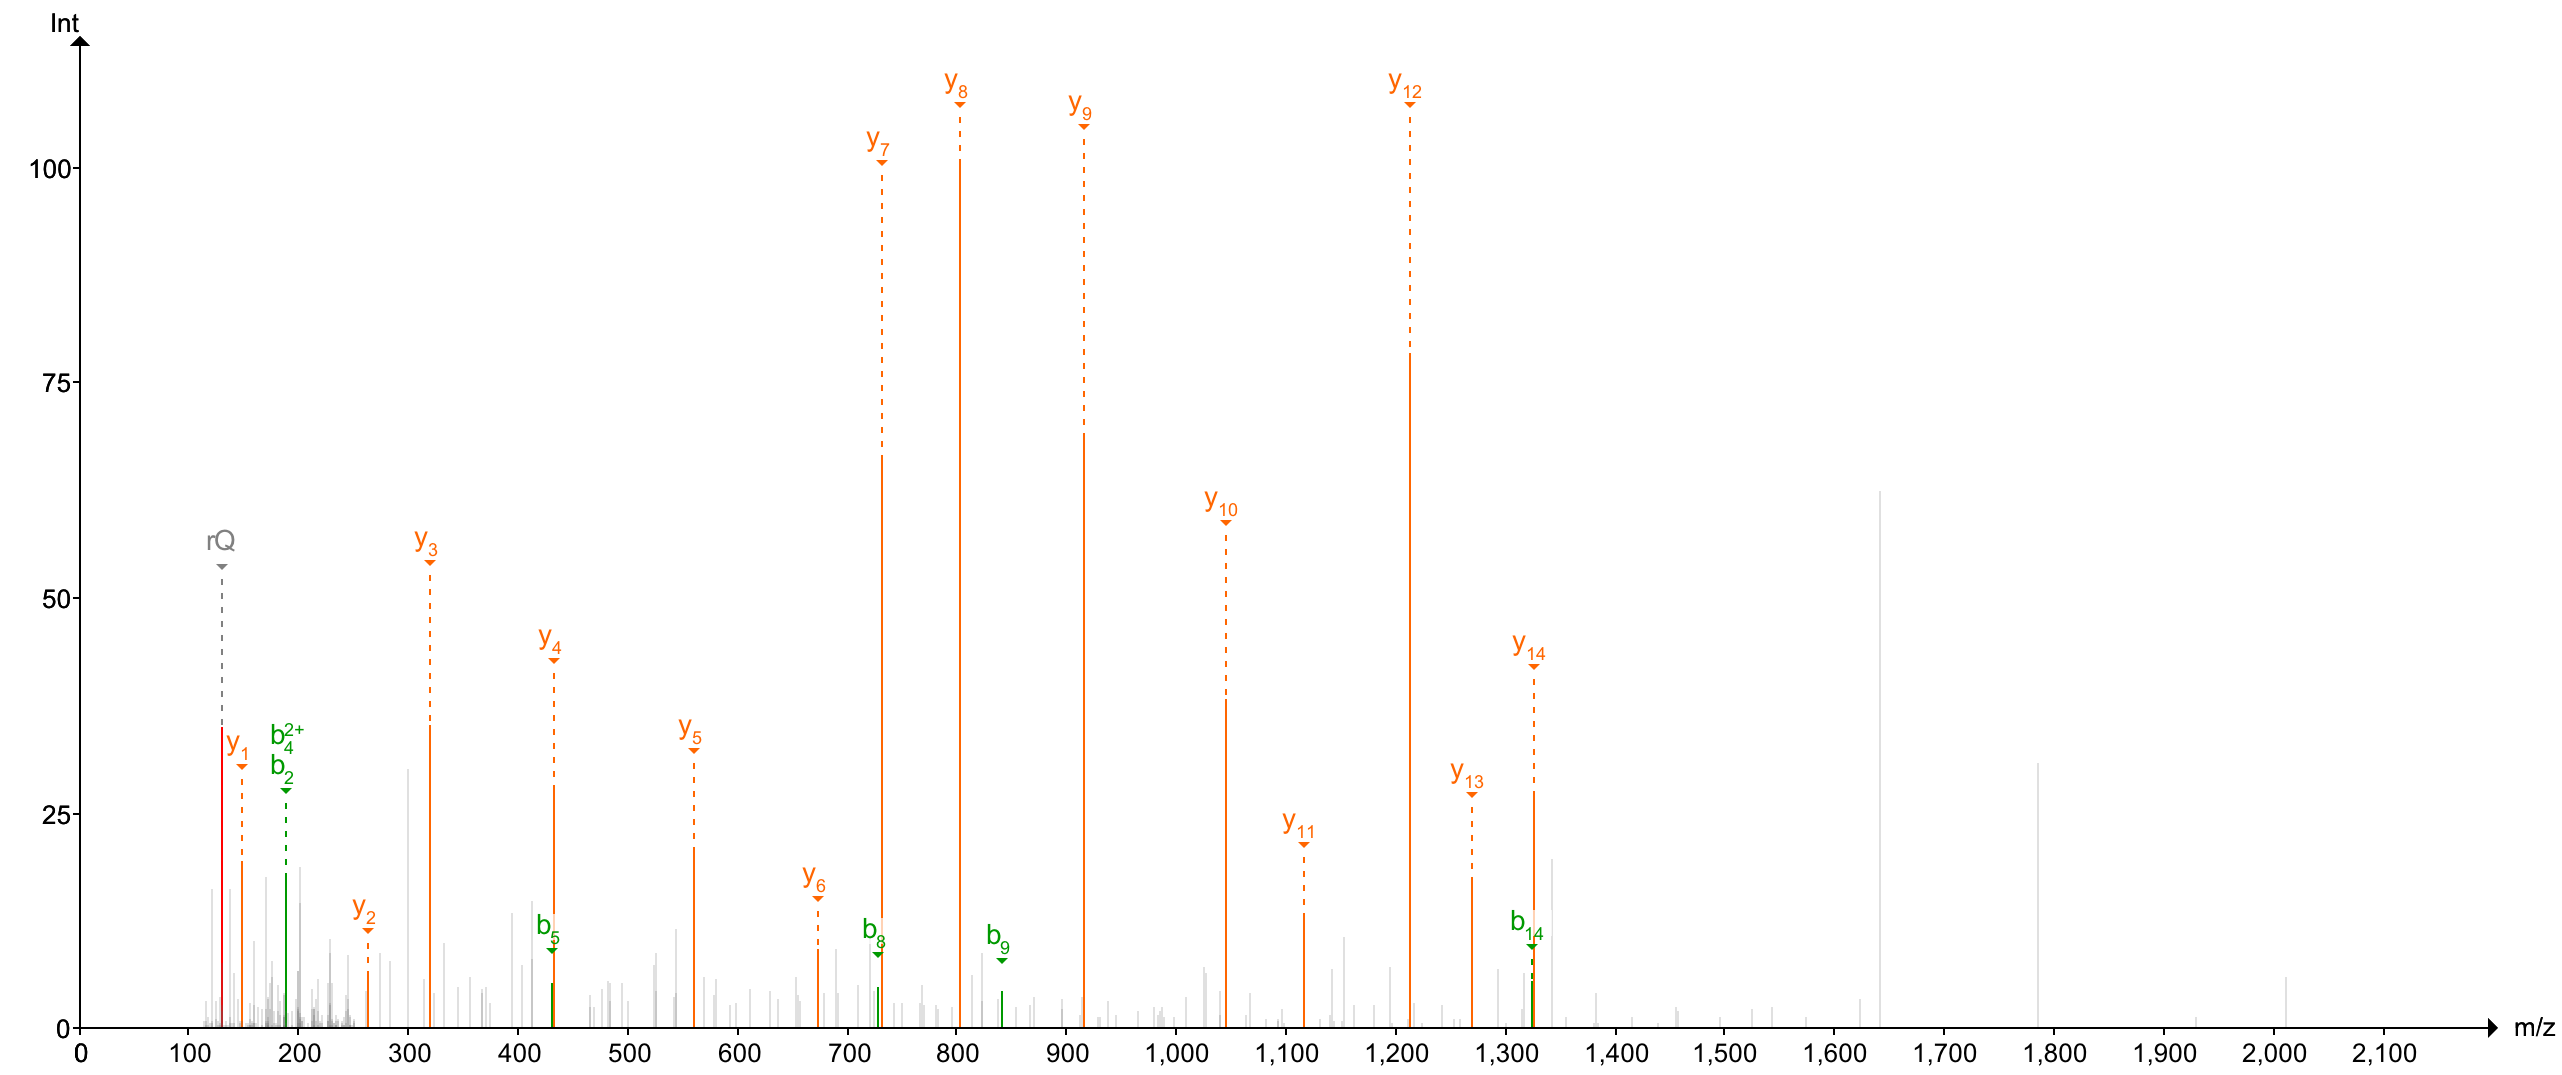

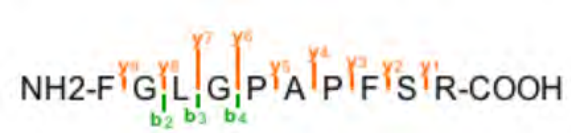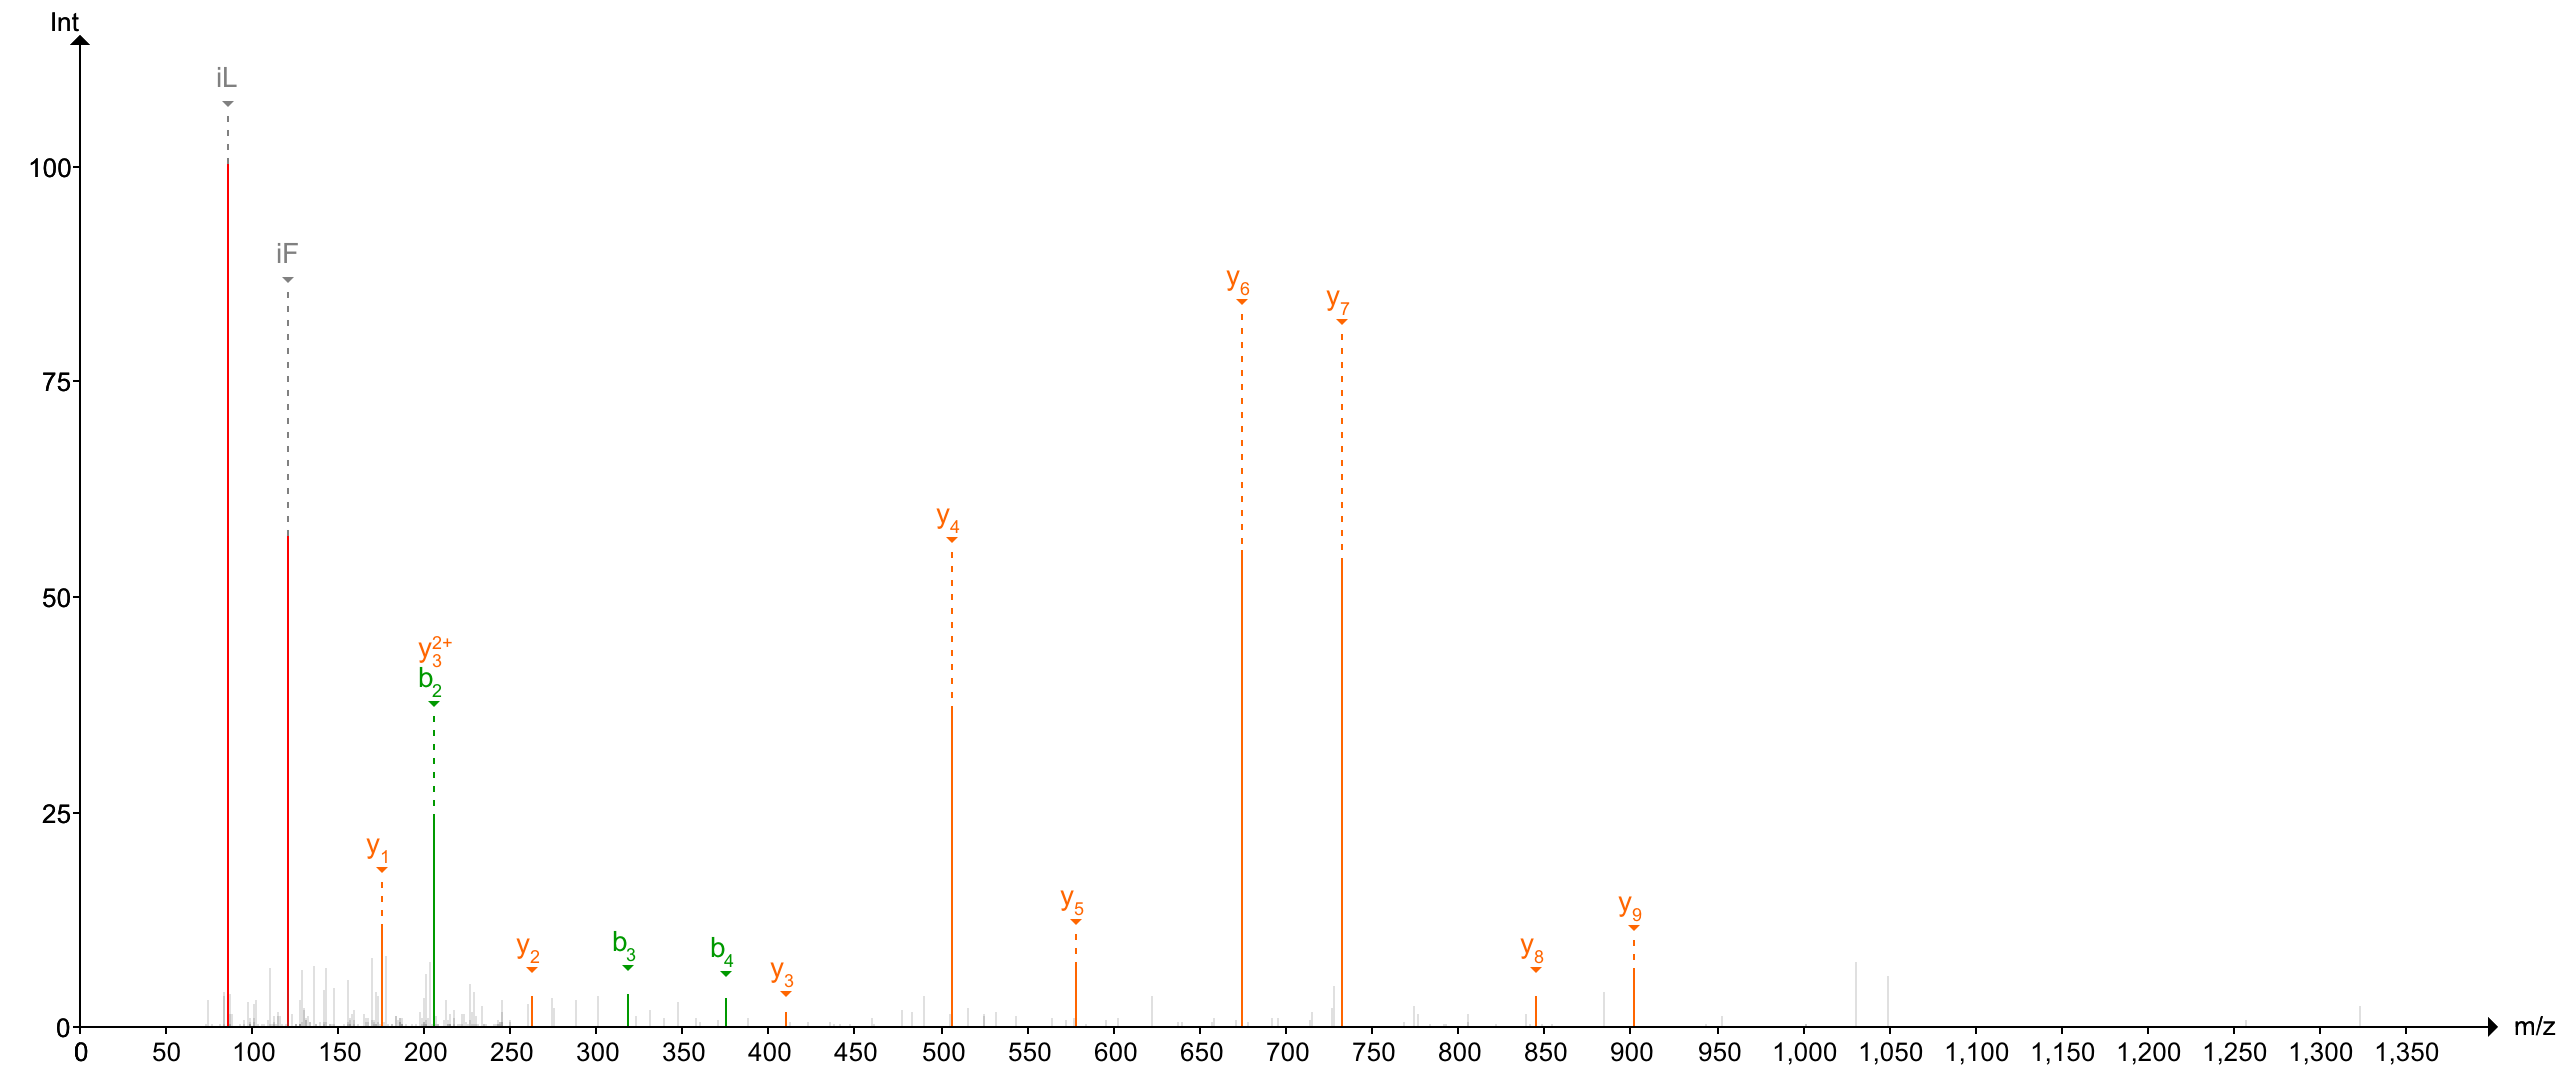

Acetyl-A E R P E D L N L P N A V I T R-COOH

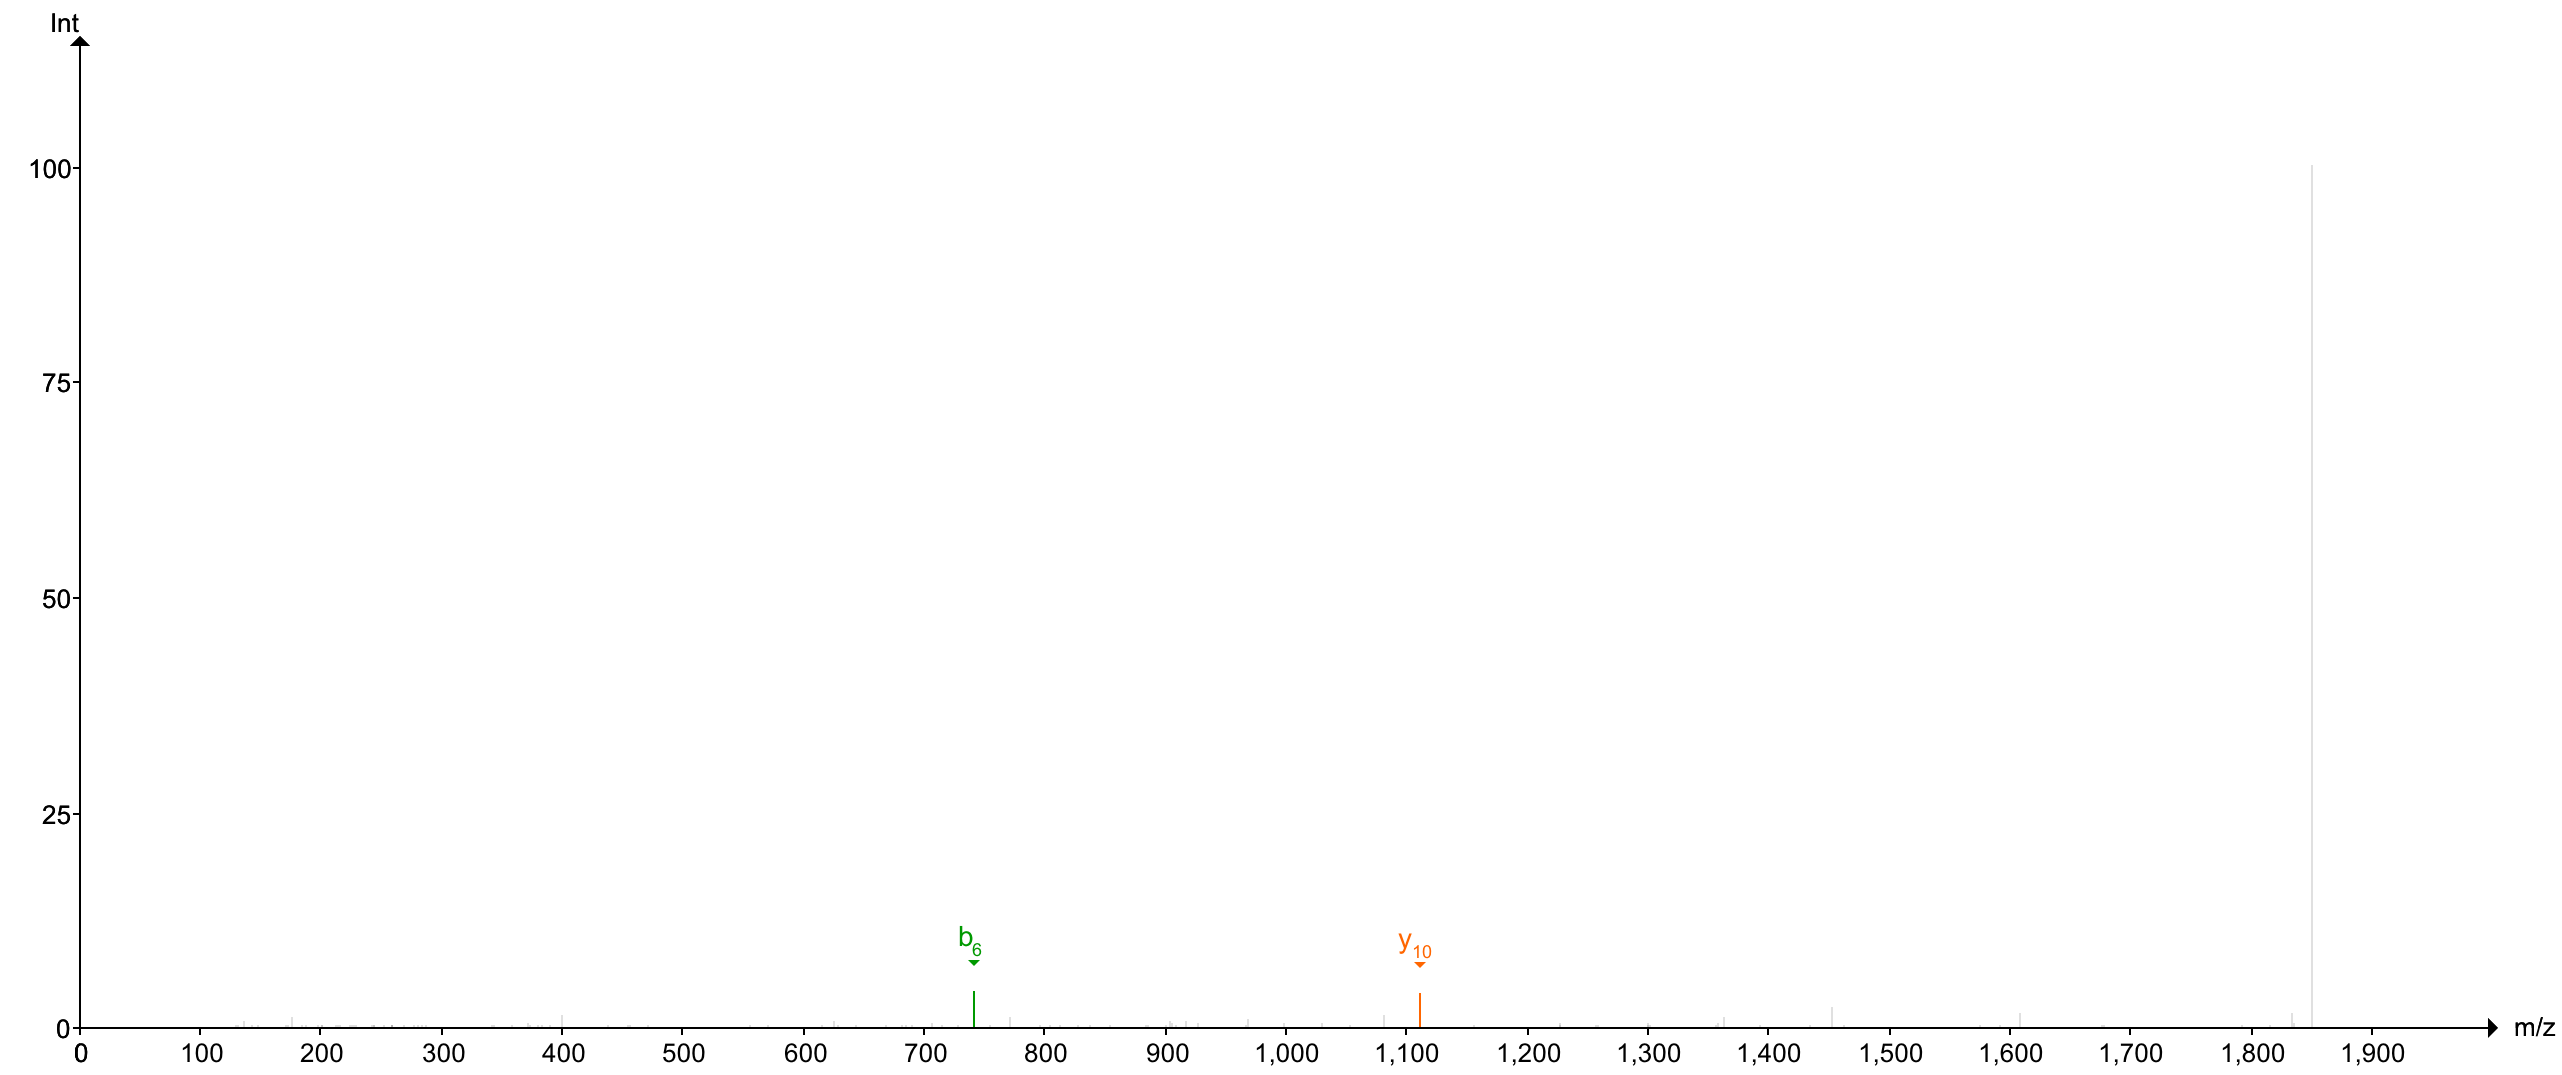

NH<sub>2</sub>-L L A P D E I I Q E V G K-COOH

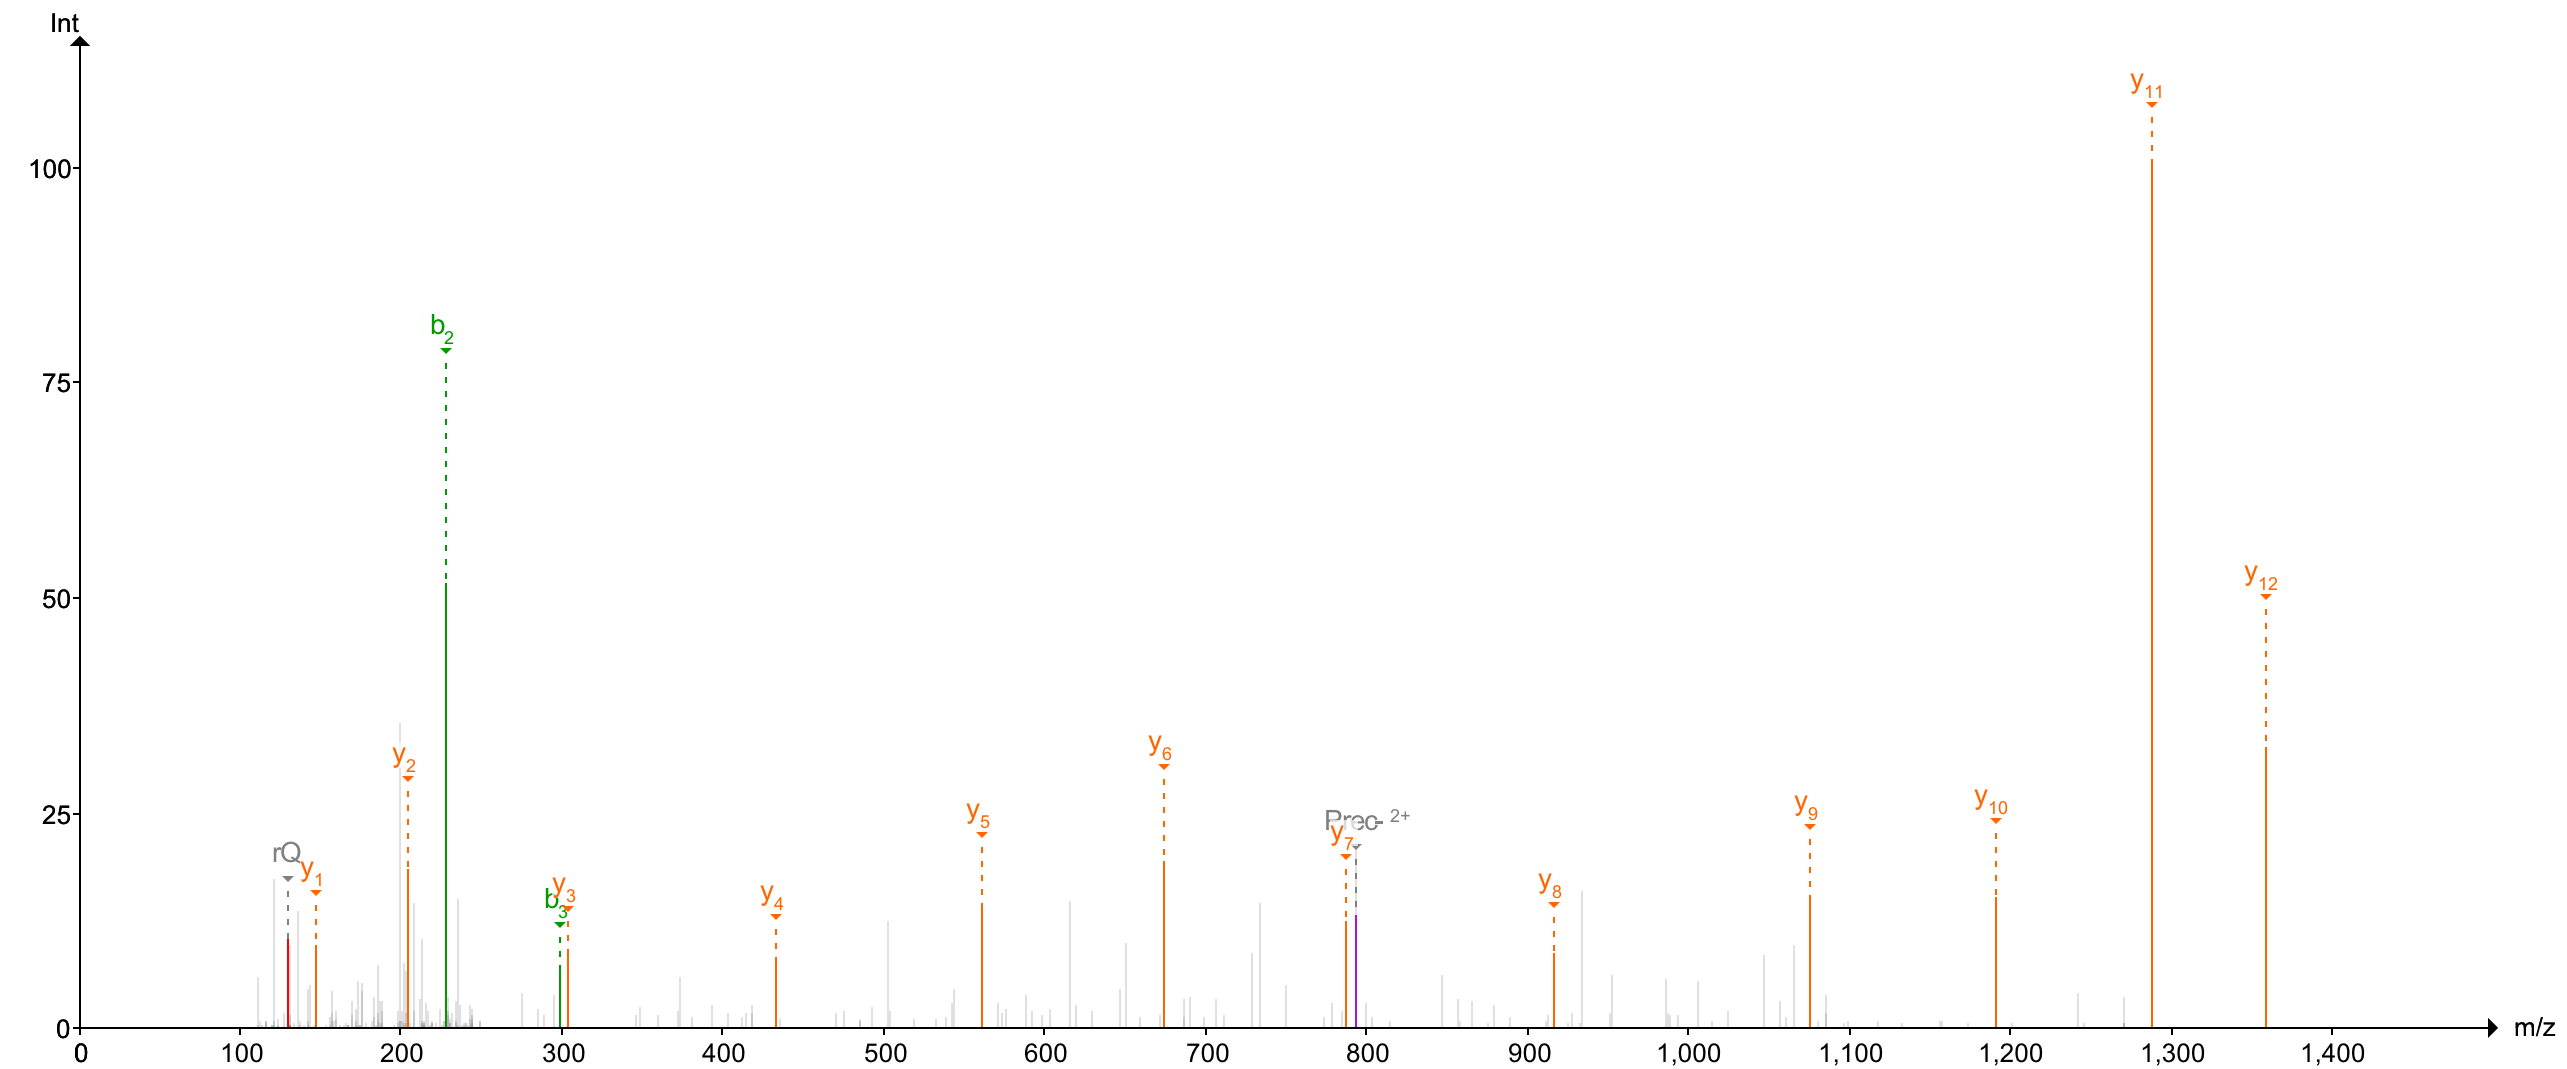

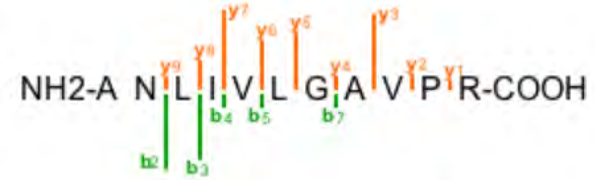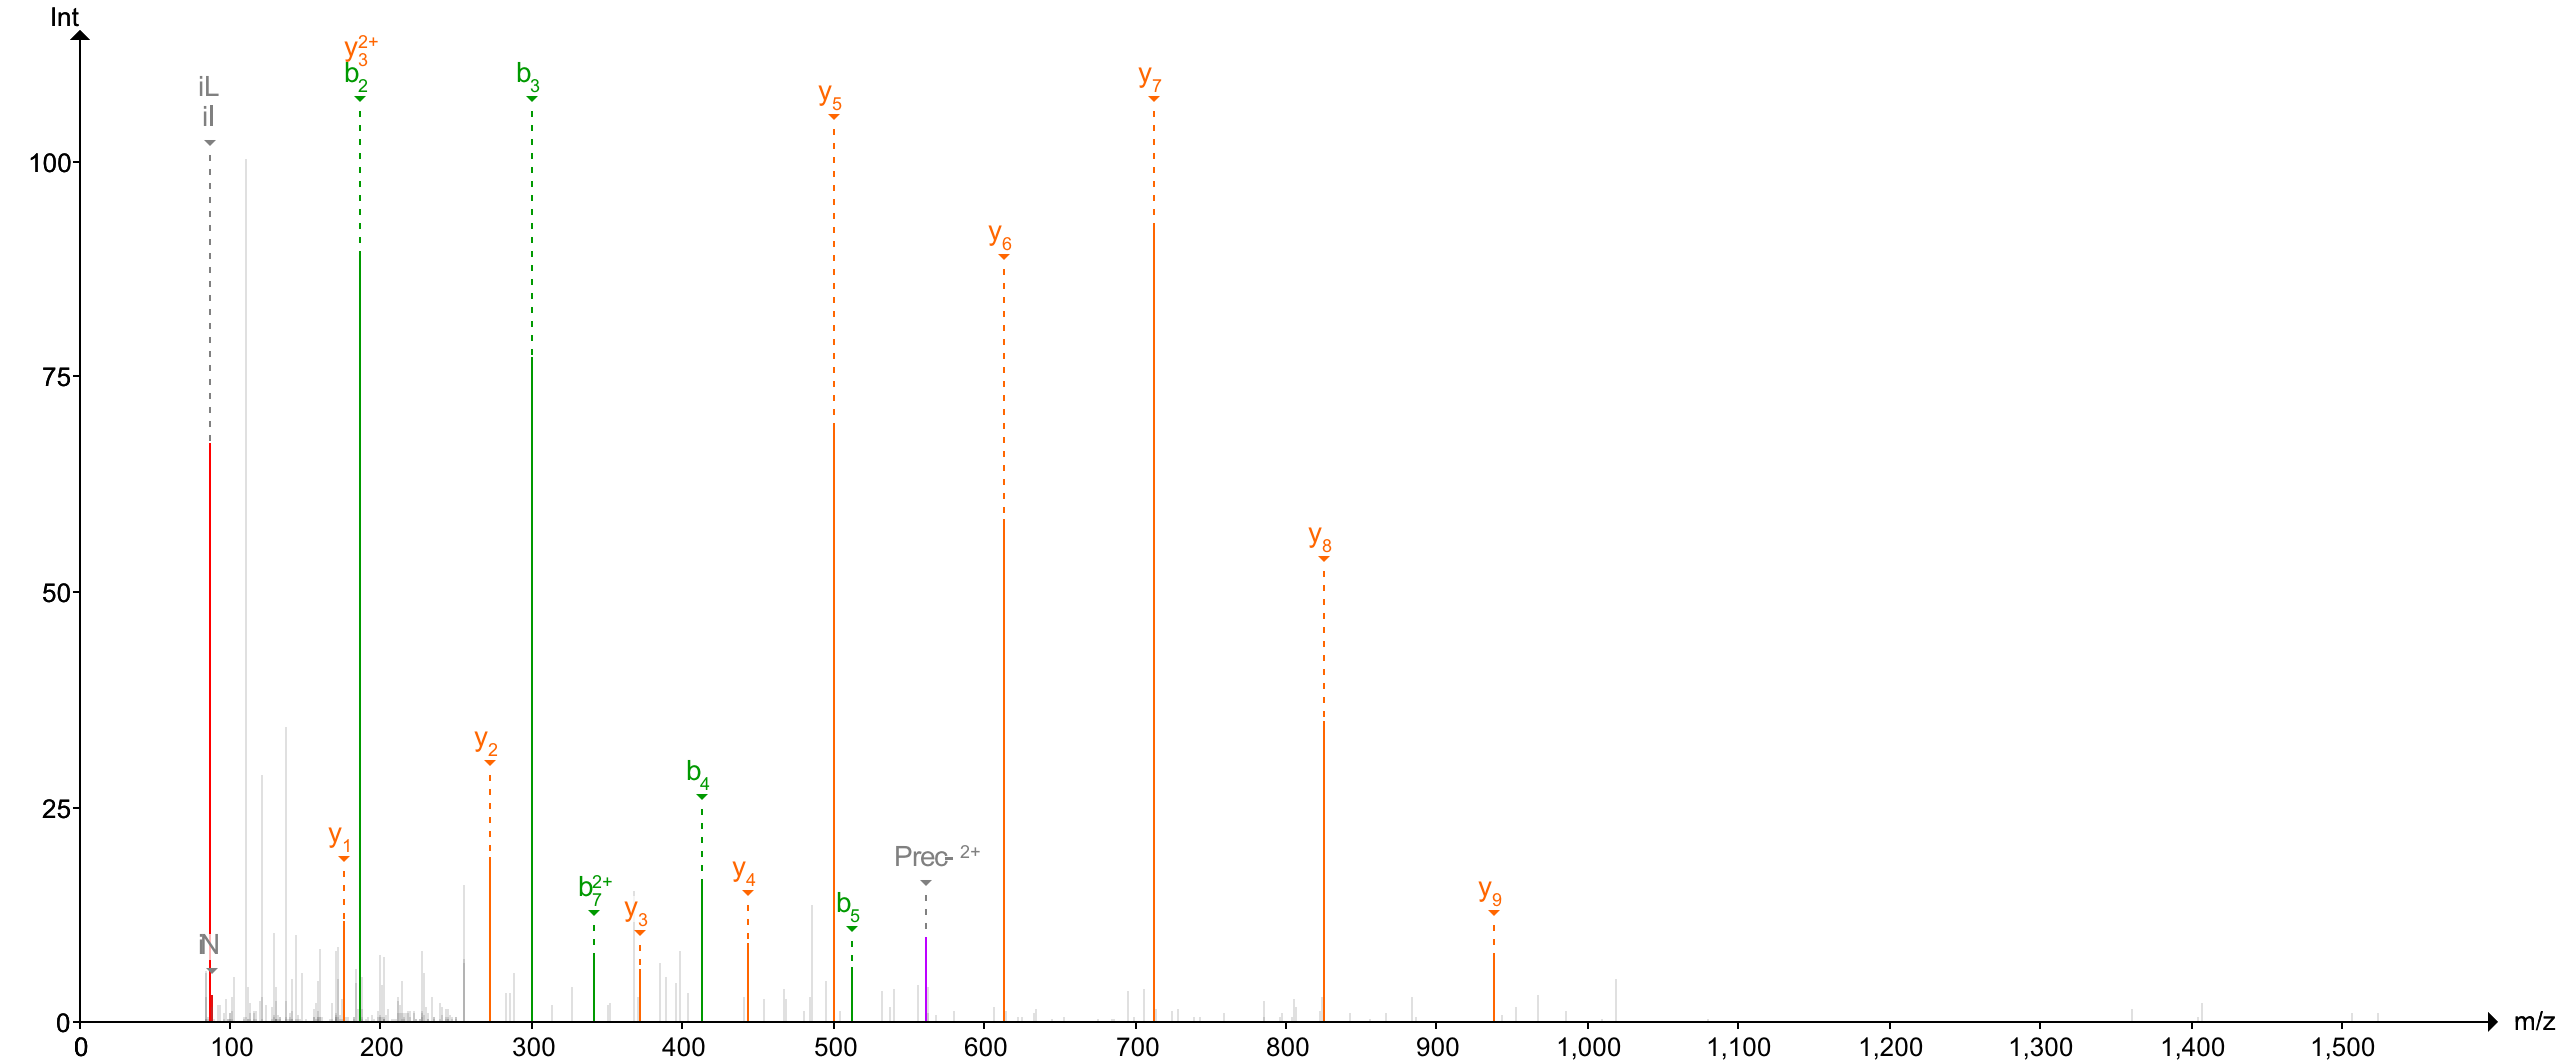



NH<sub>2</sub>-L L I I Y D A S S L E S G V P S R-COOH

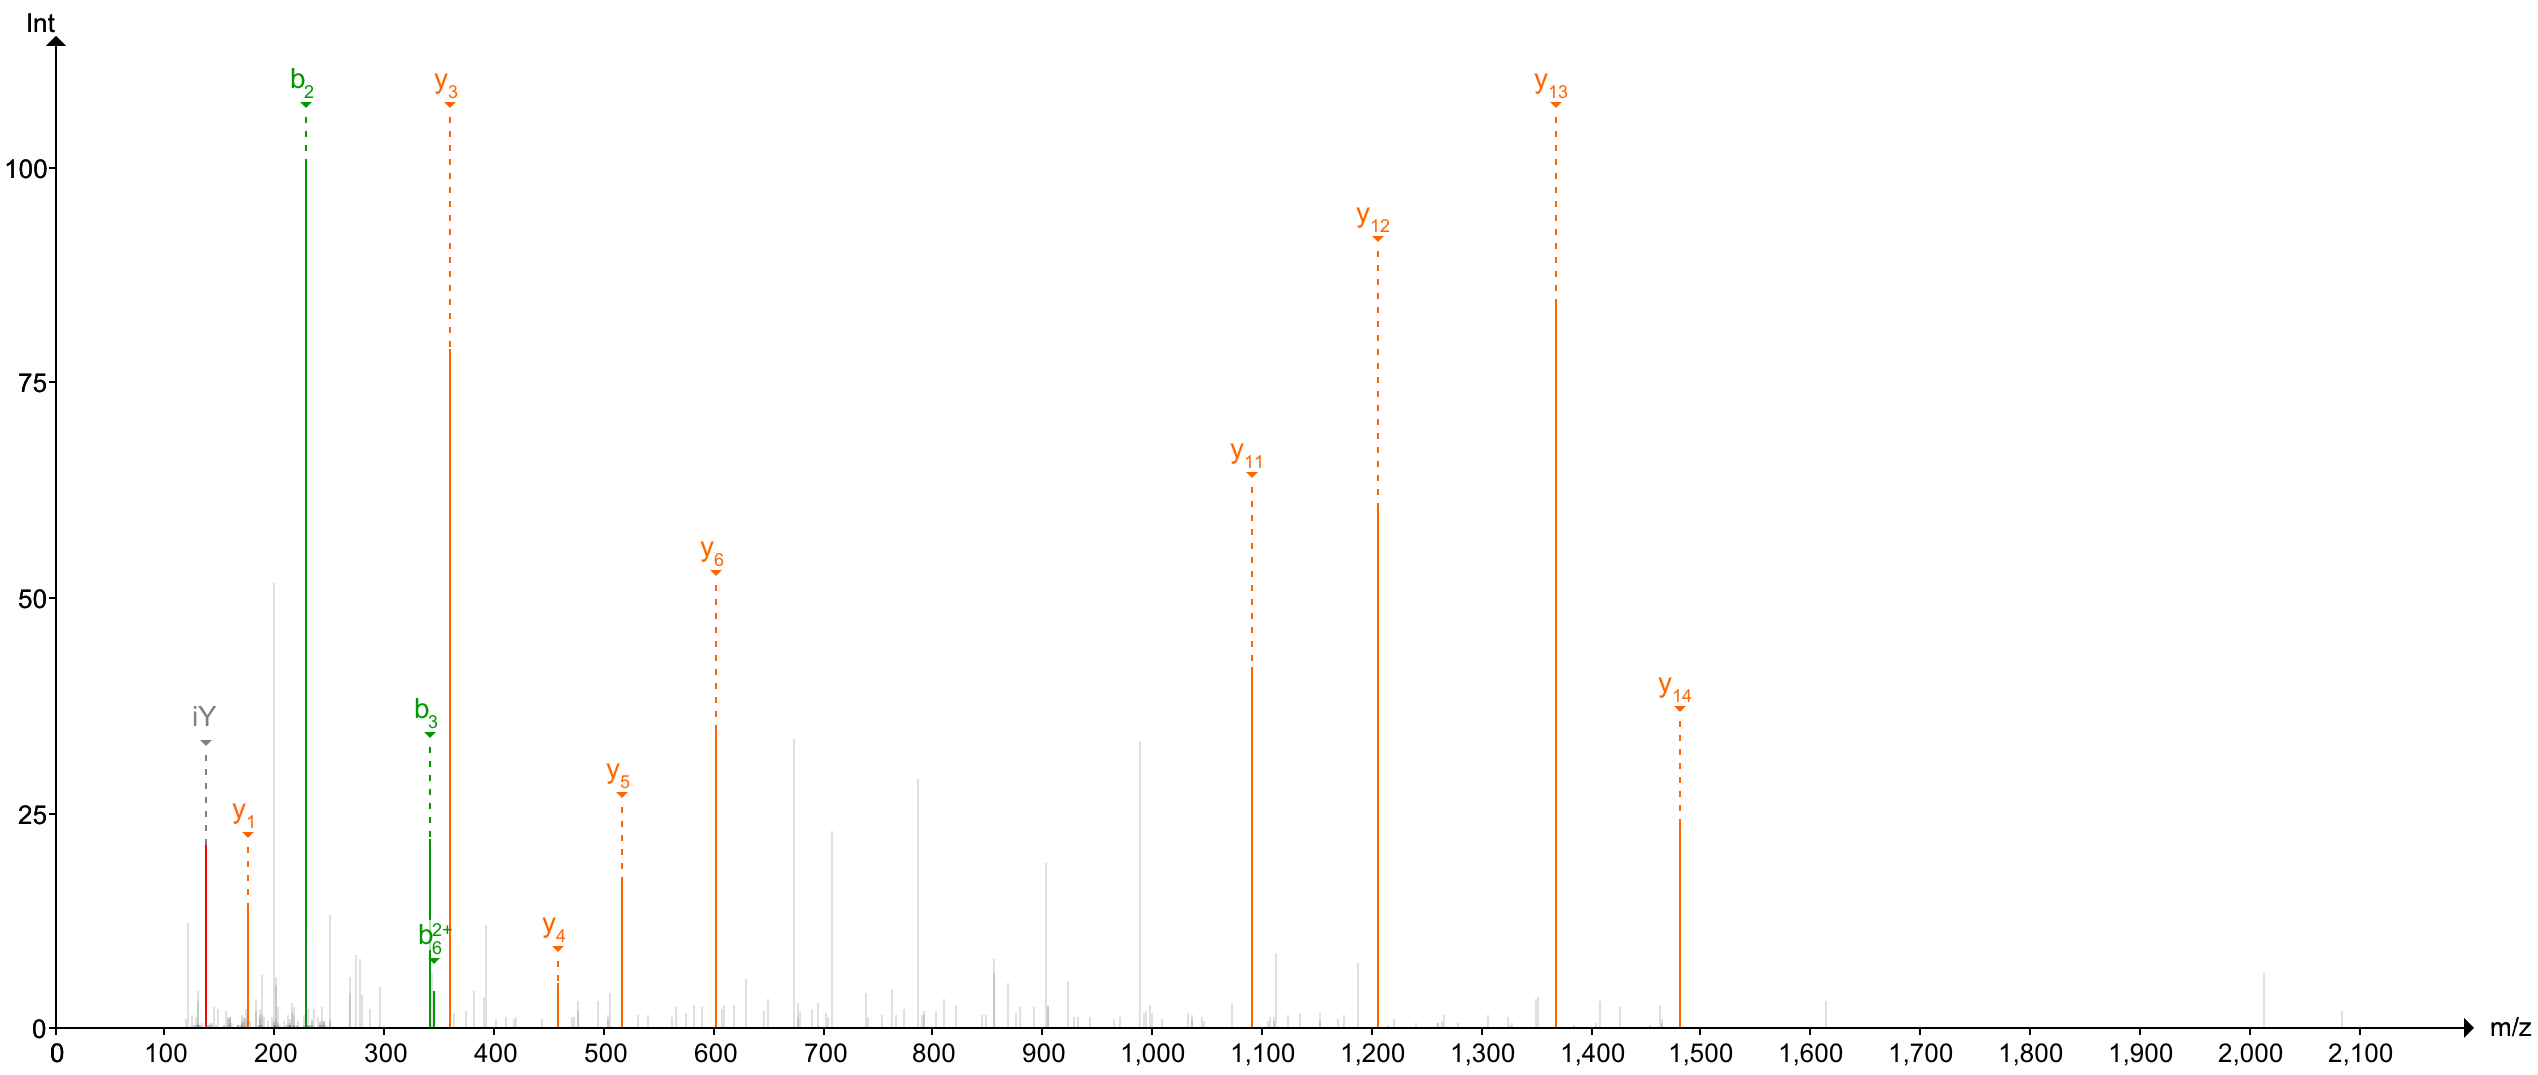

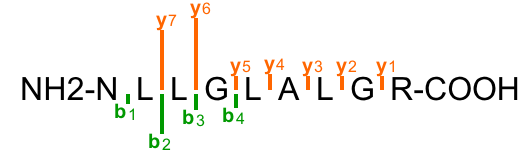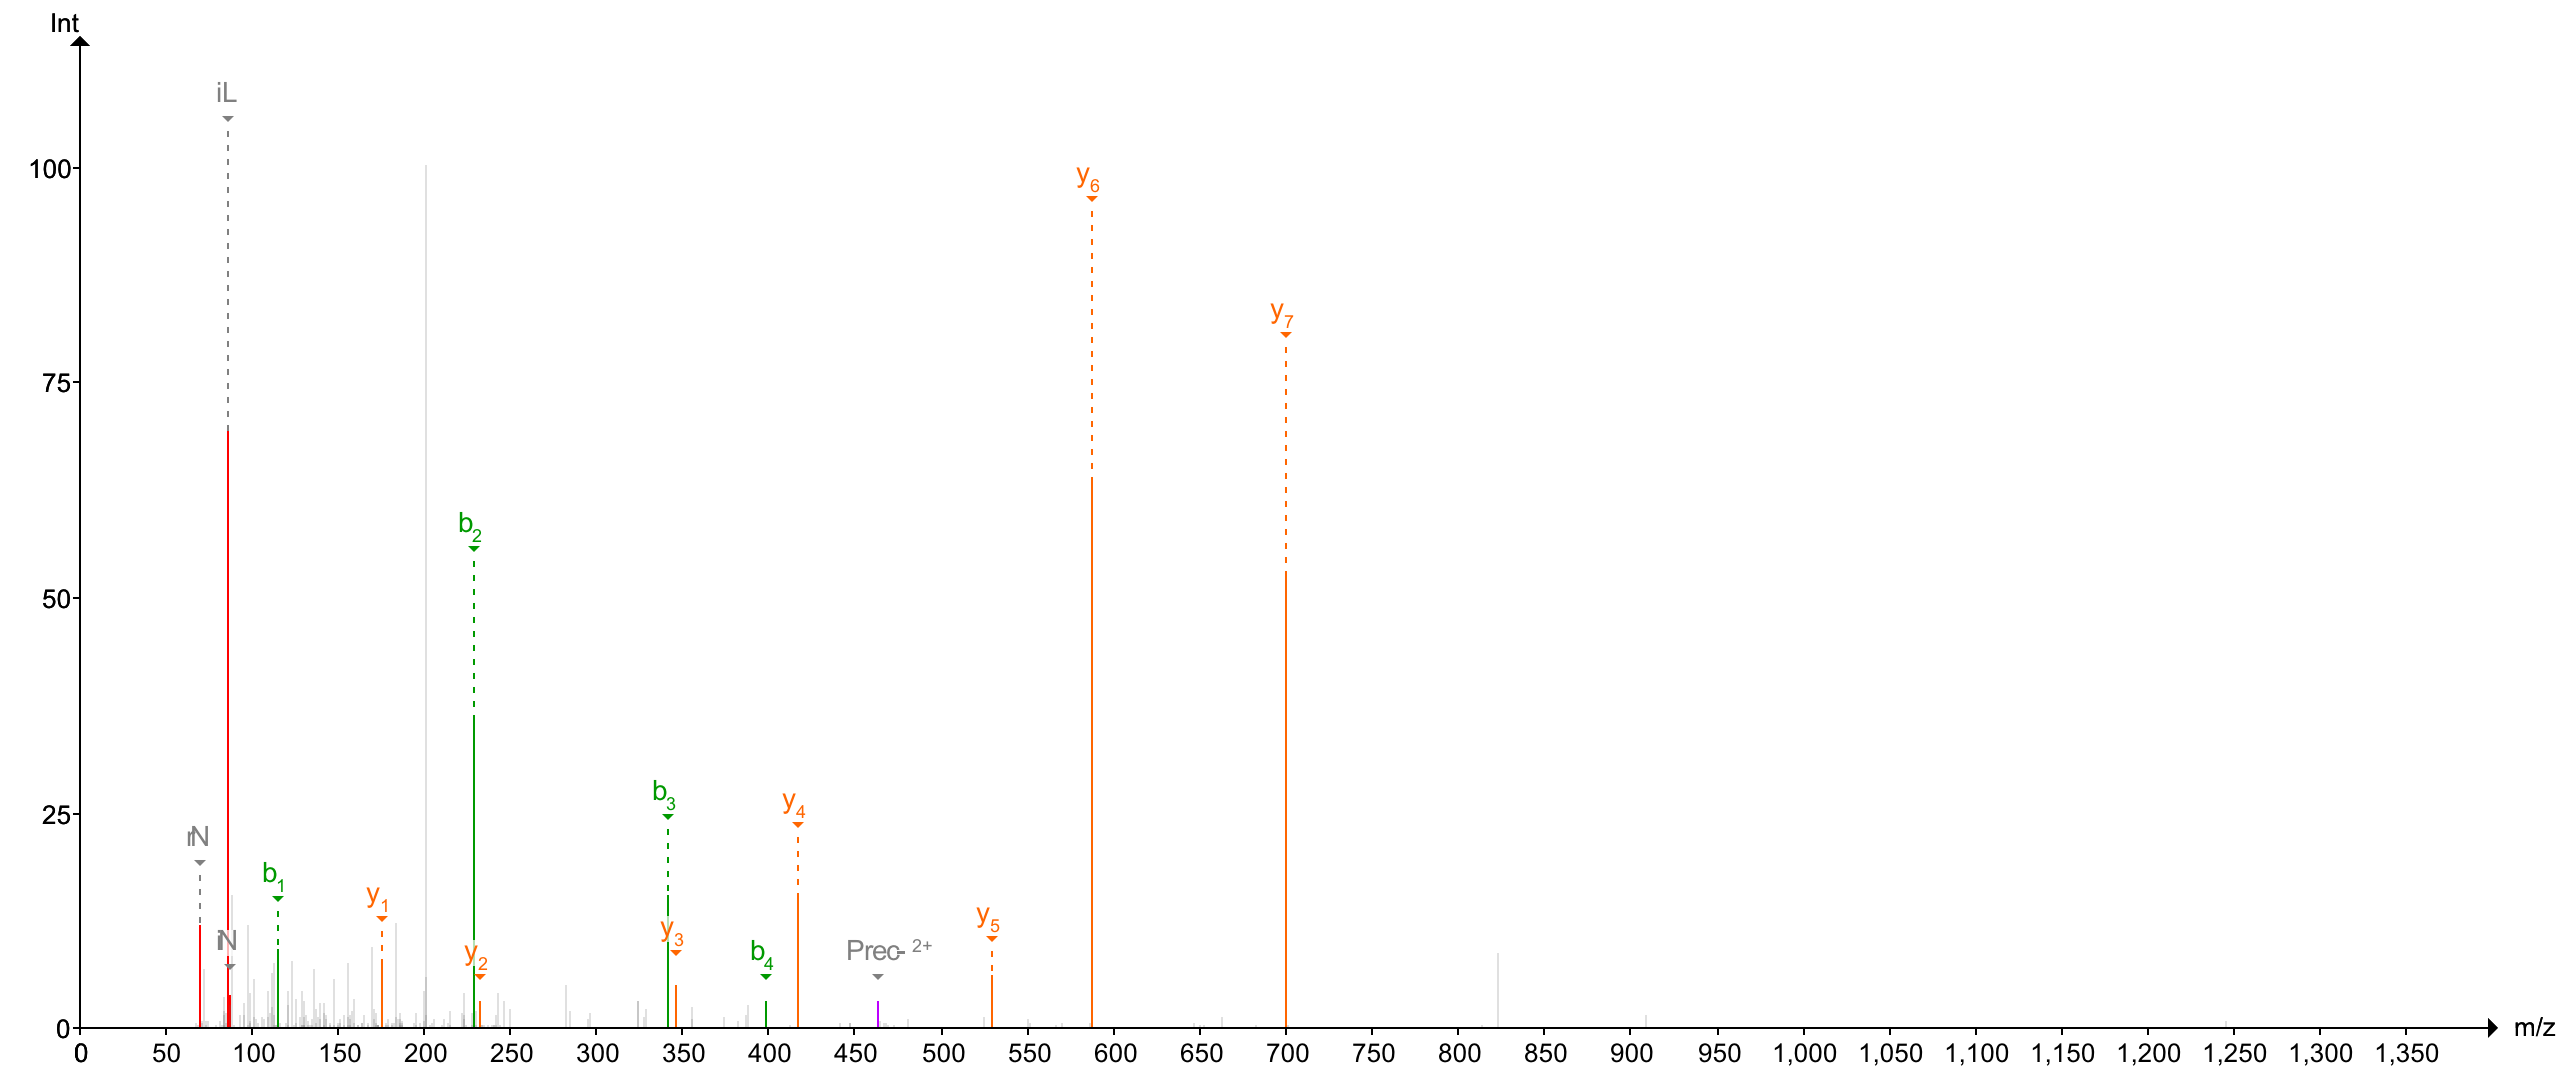

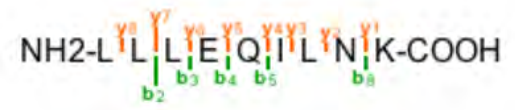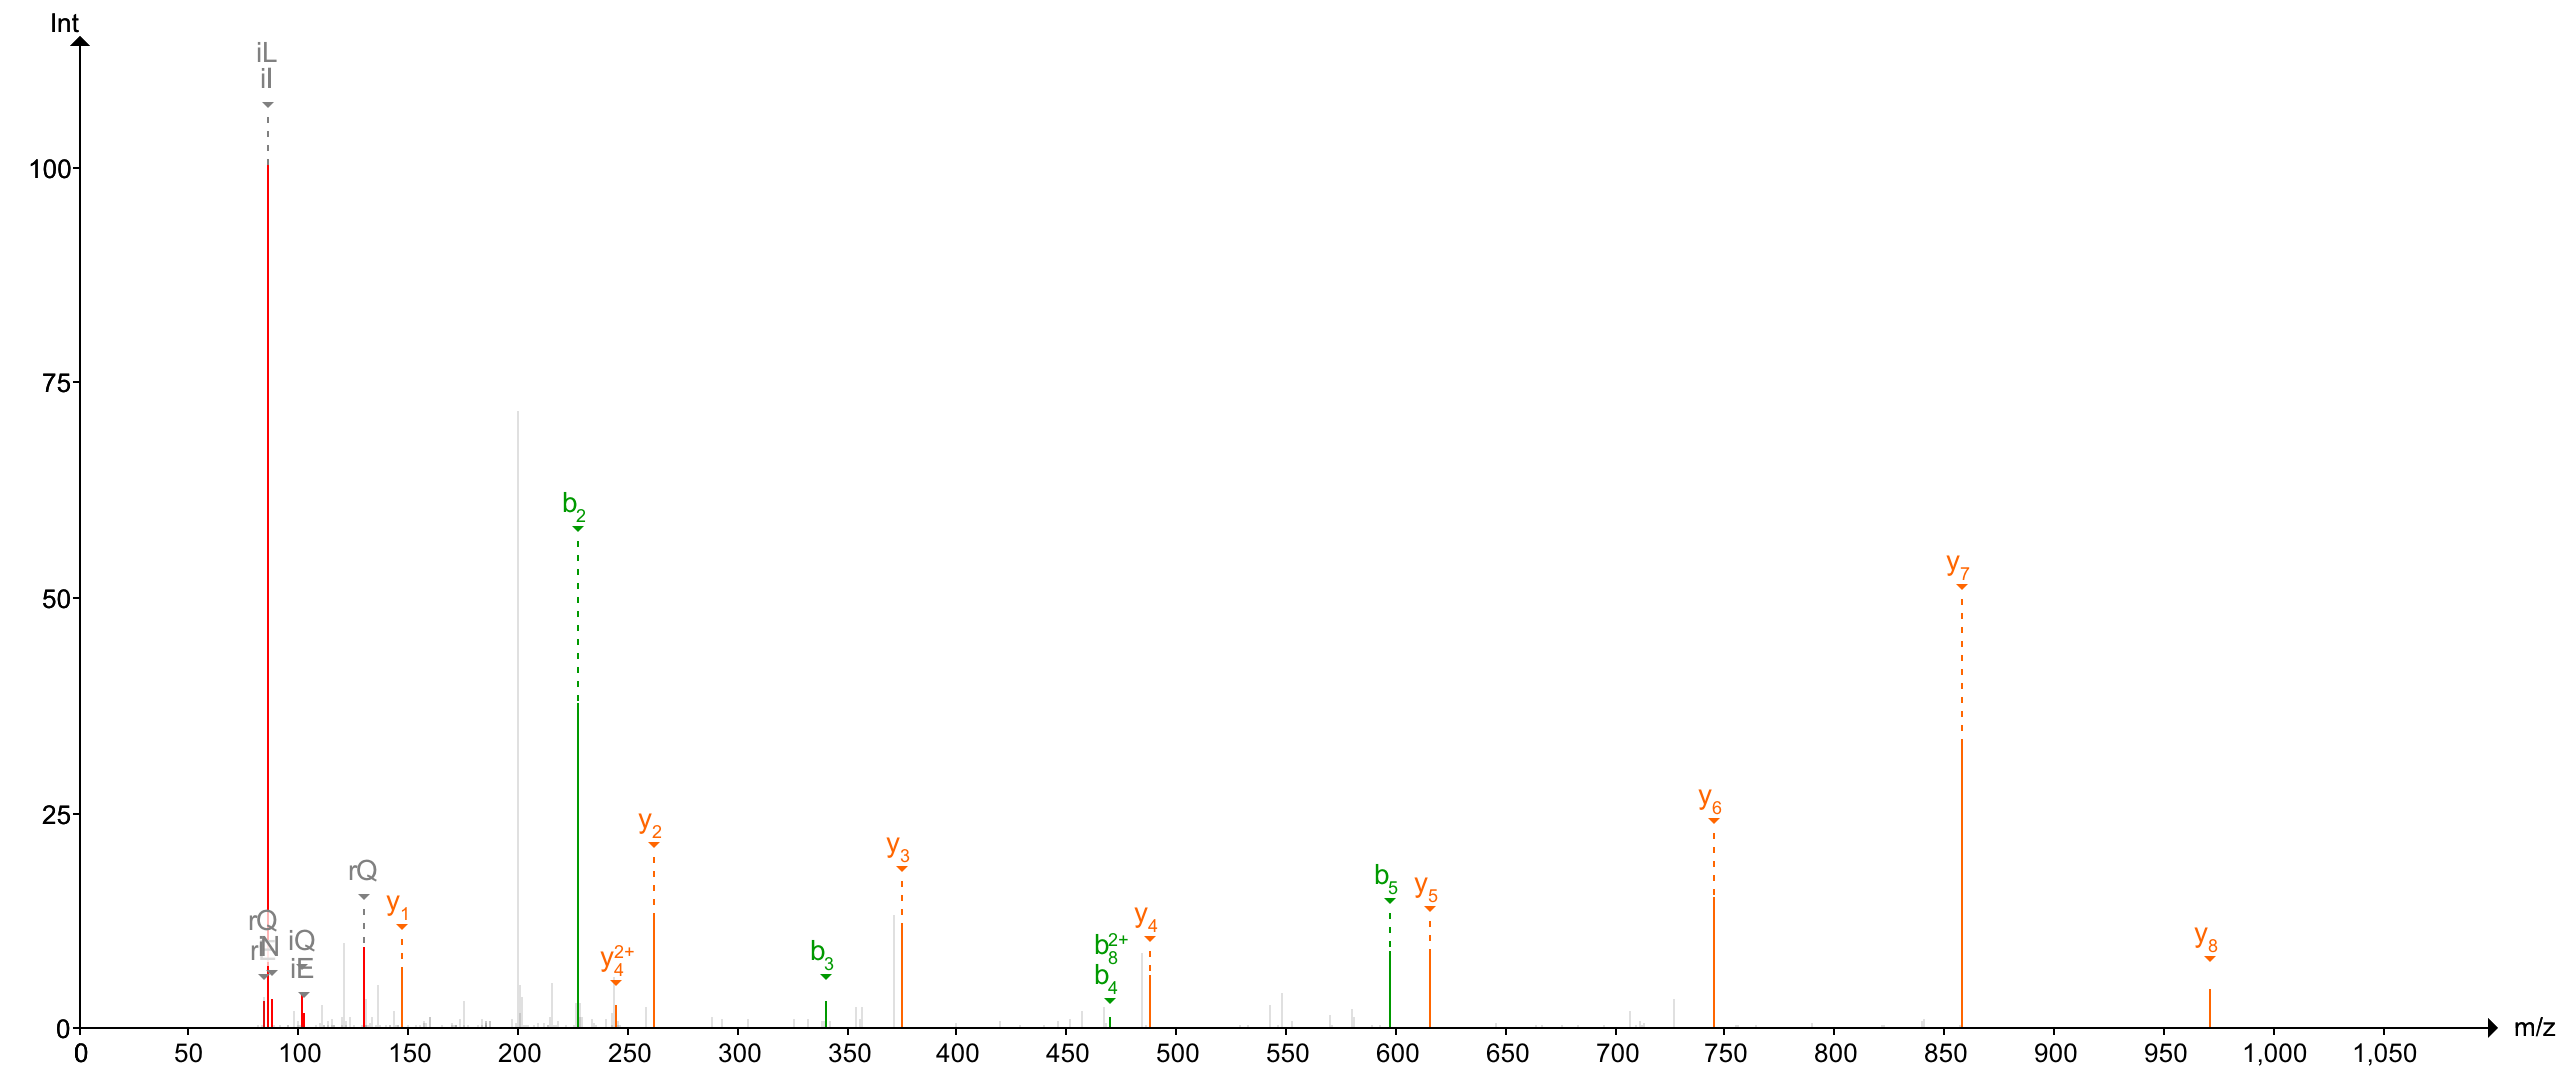

NH<sub>2</sub>-V P I F L P G D S D L D Q L T R-COOH

b<sub>2</sub> b<sub>3</sub> b<sub>4</sub>

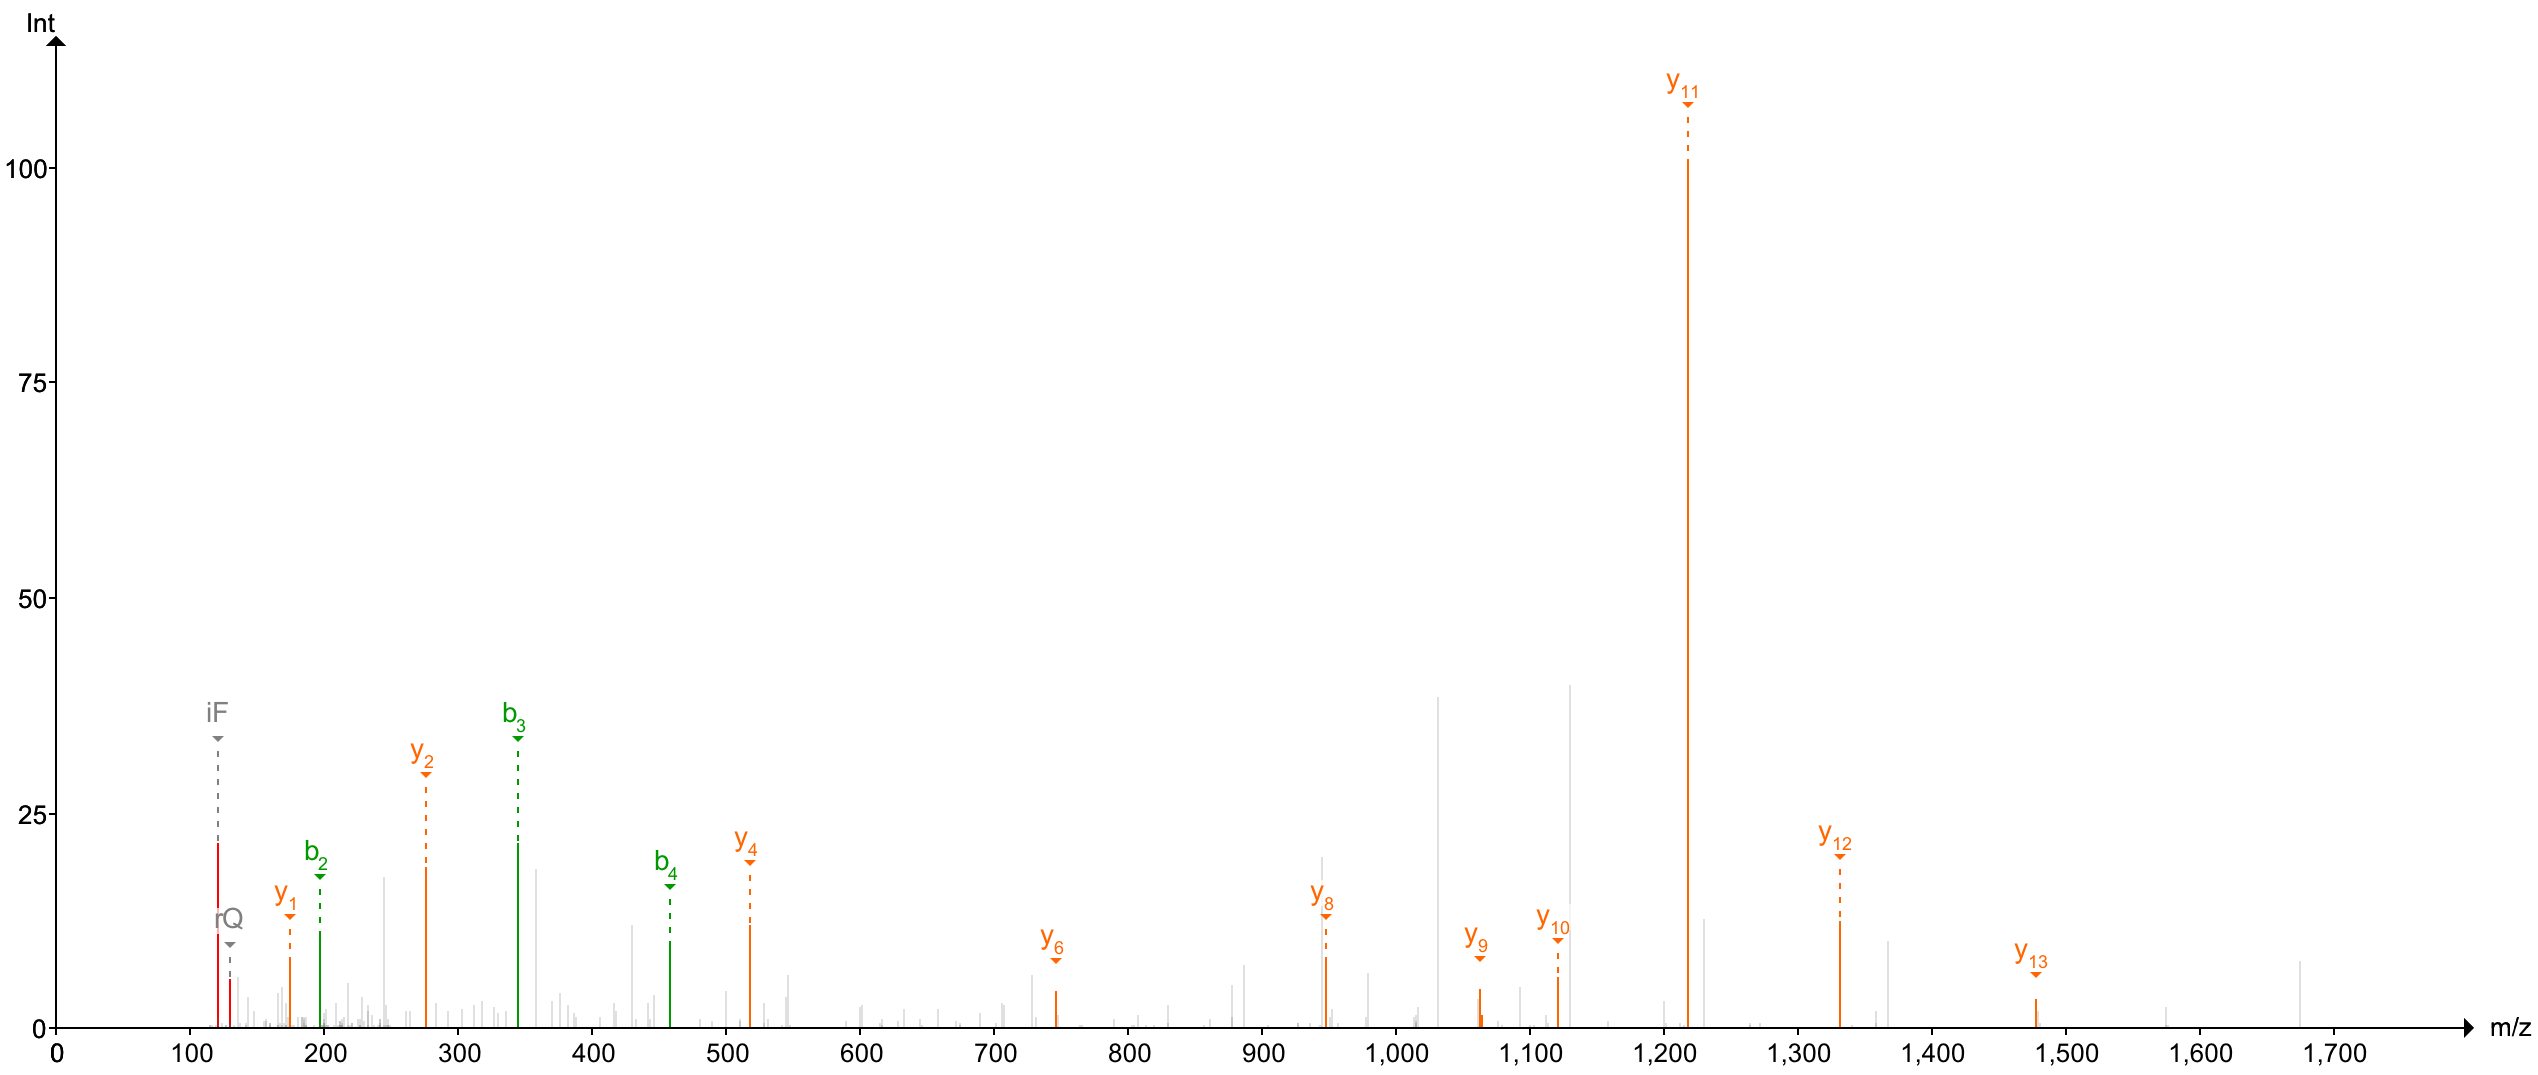

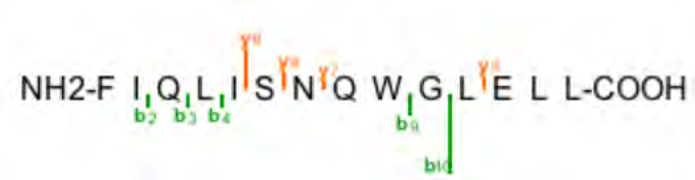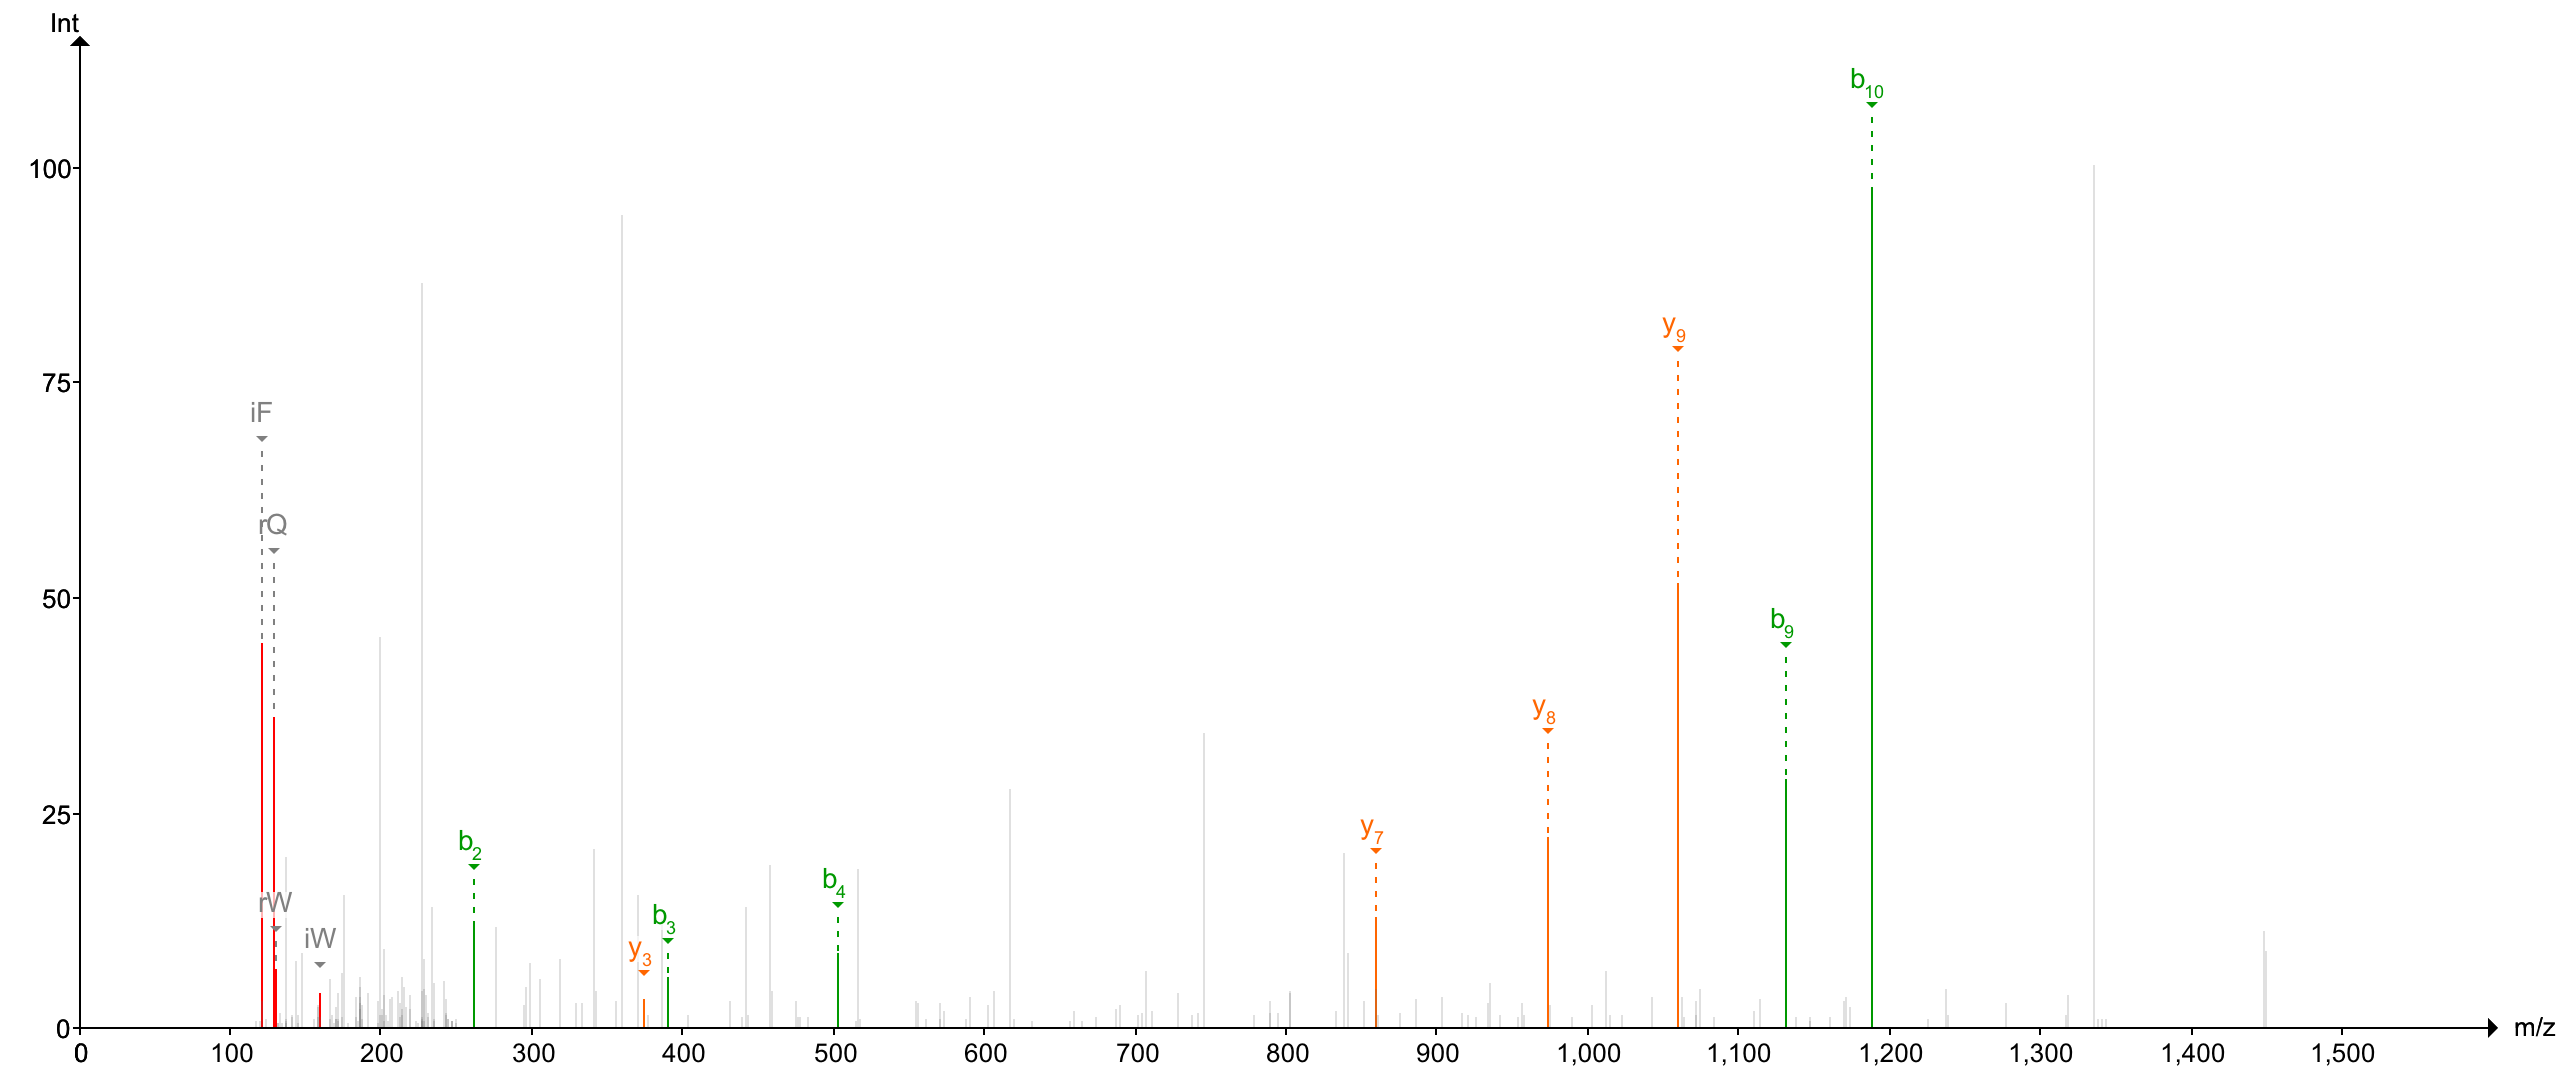

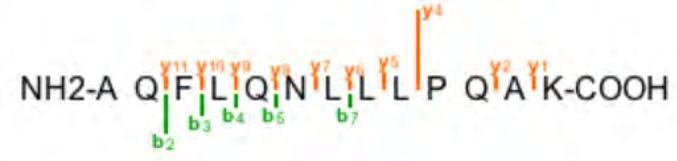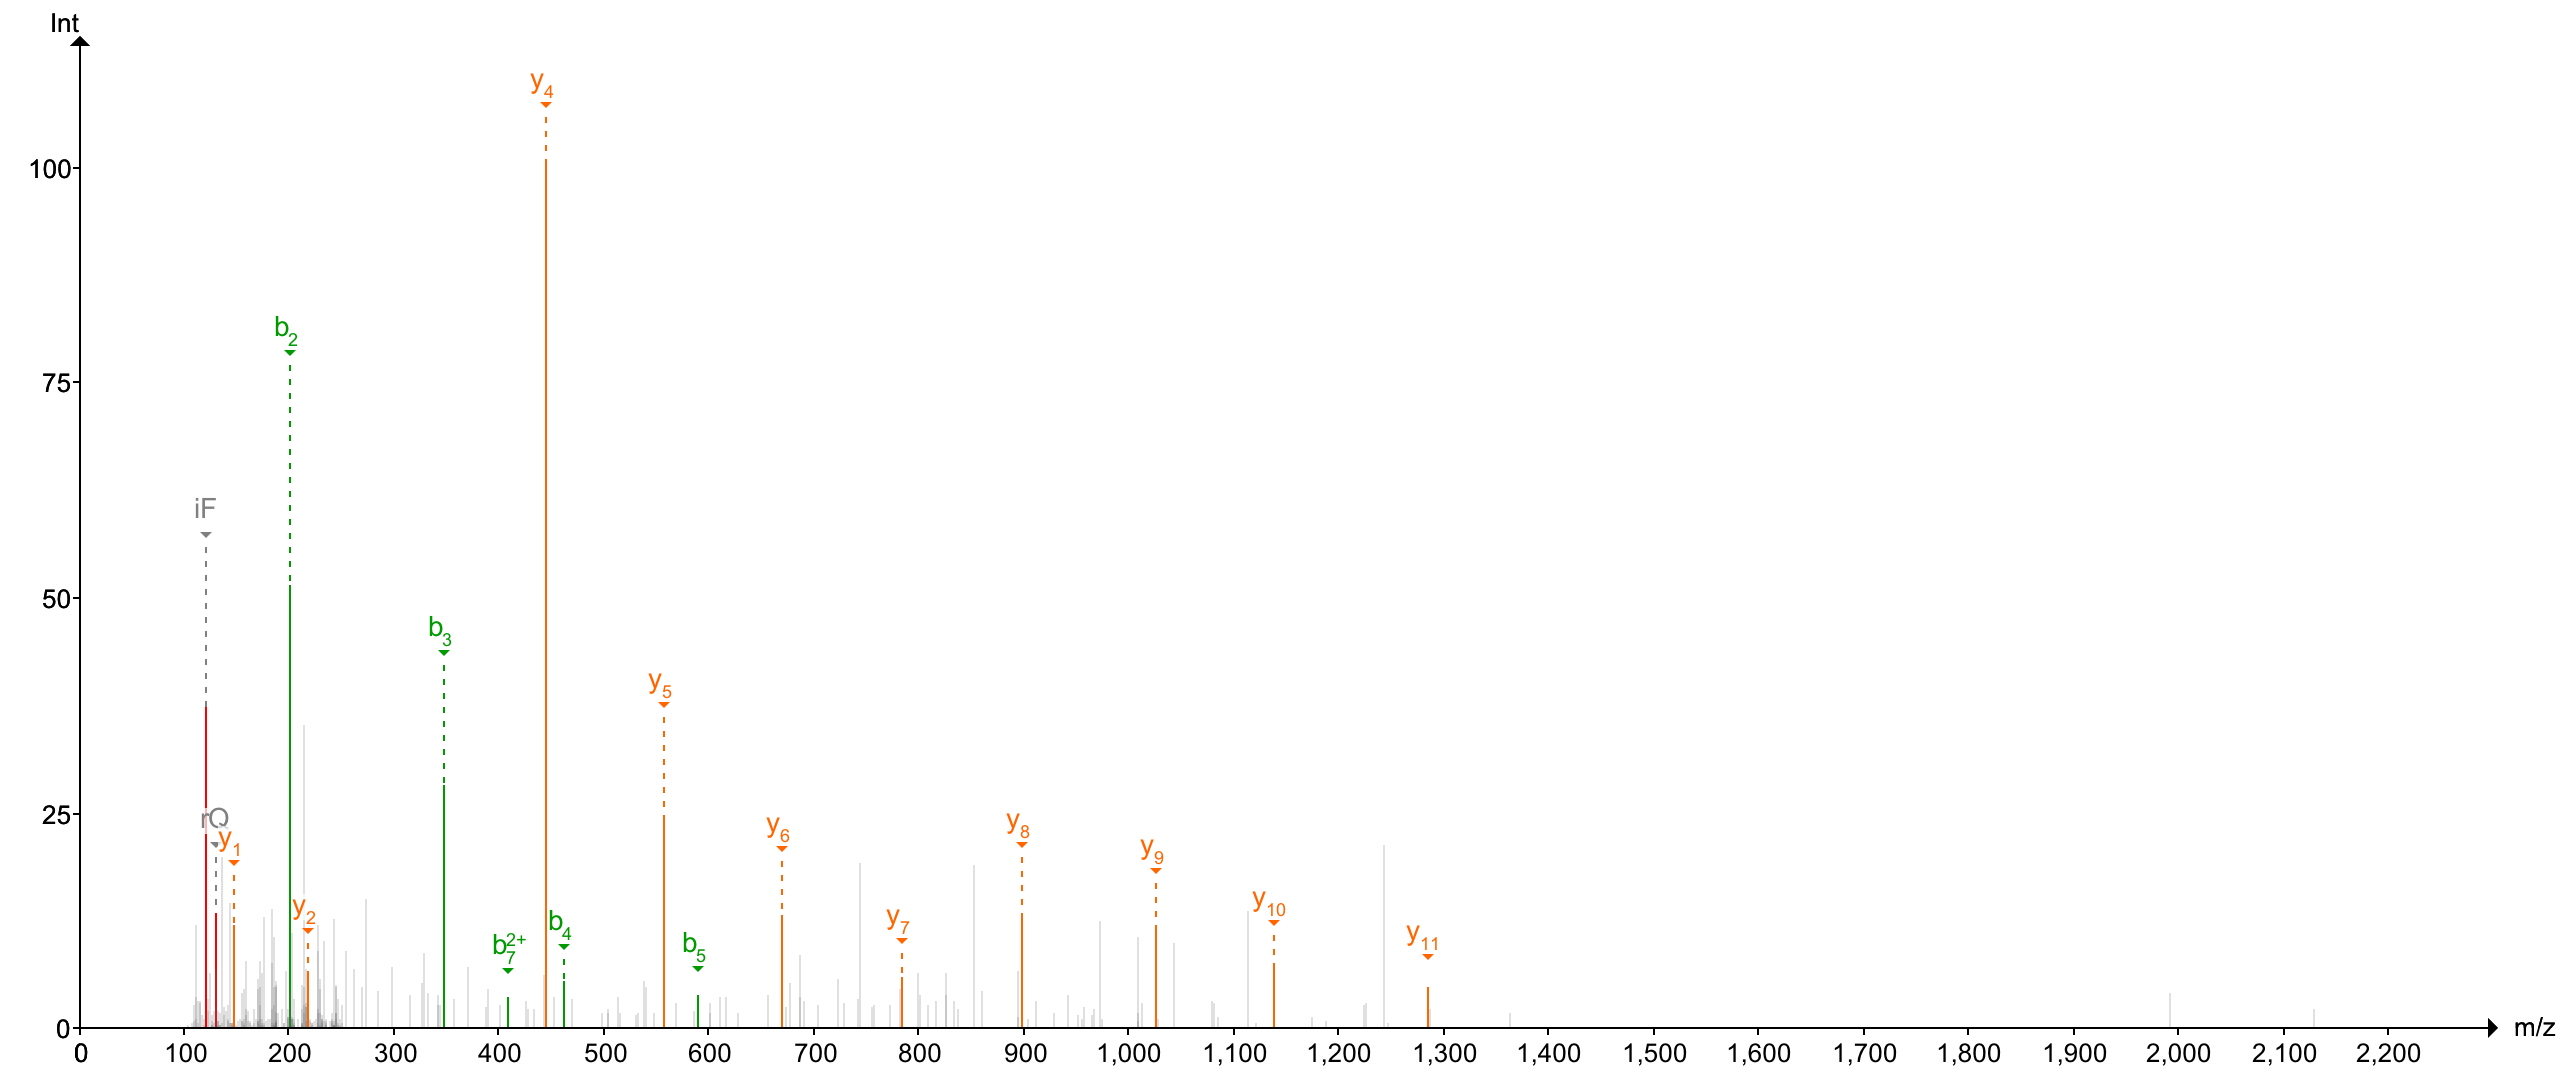

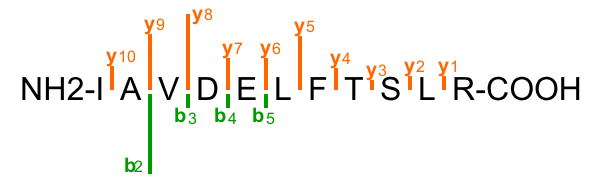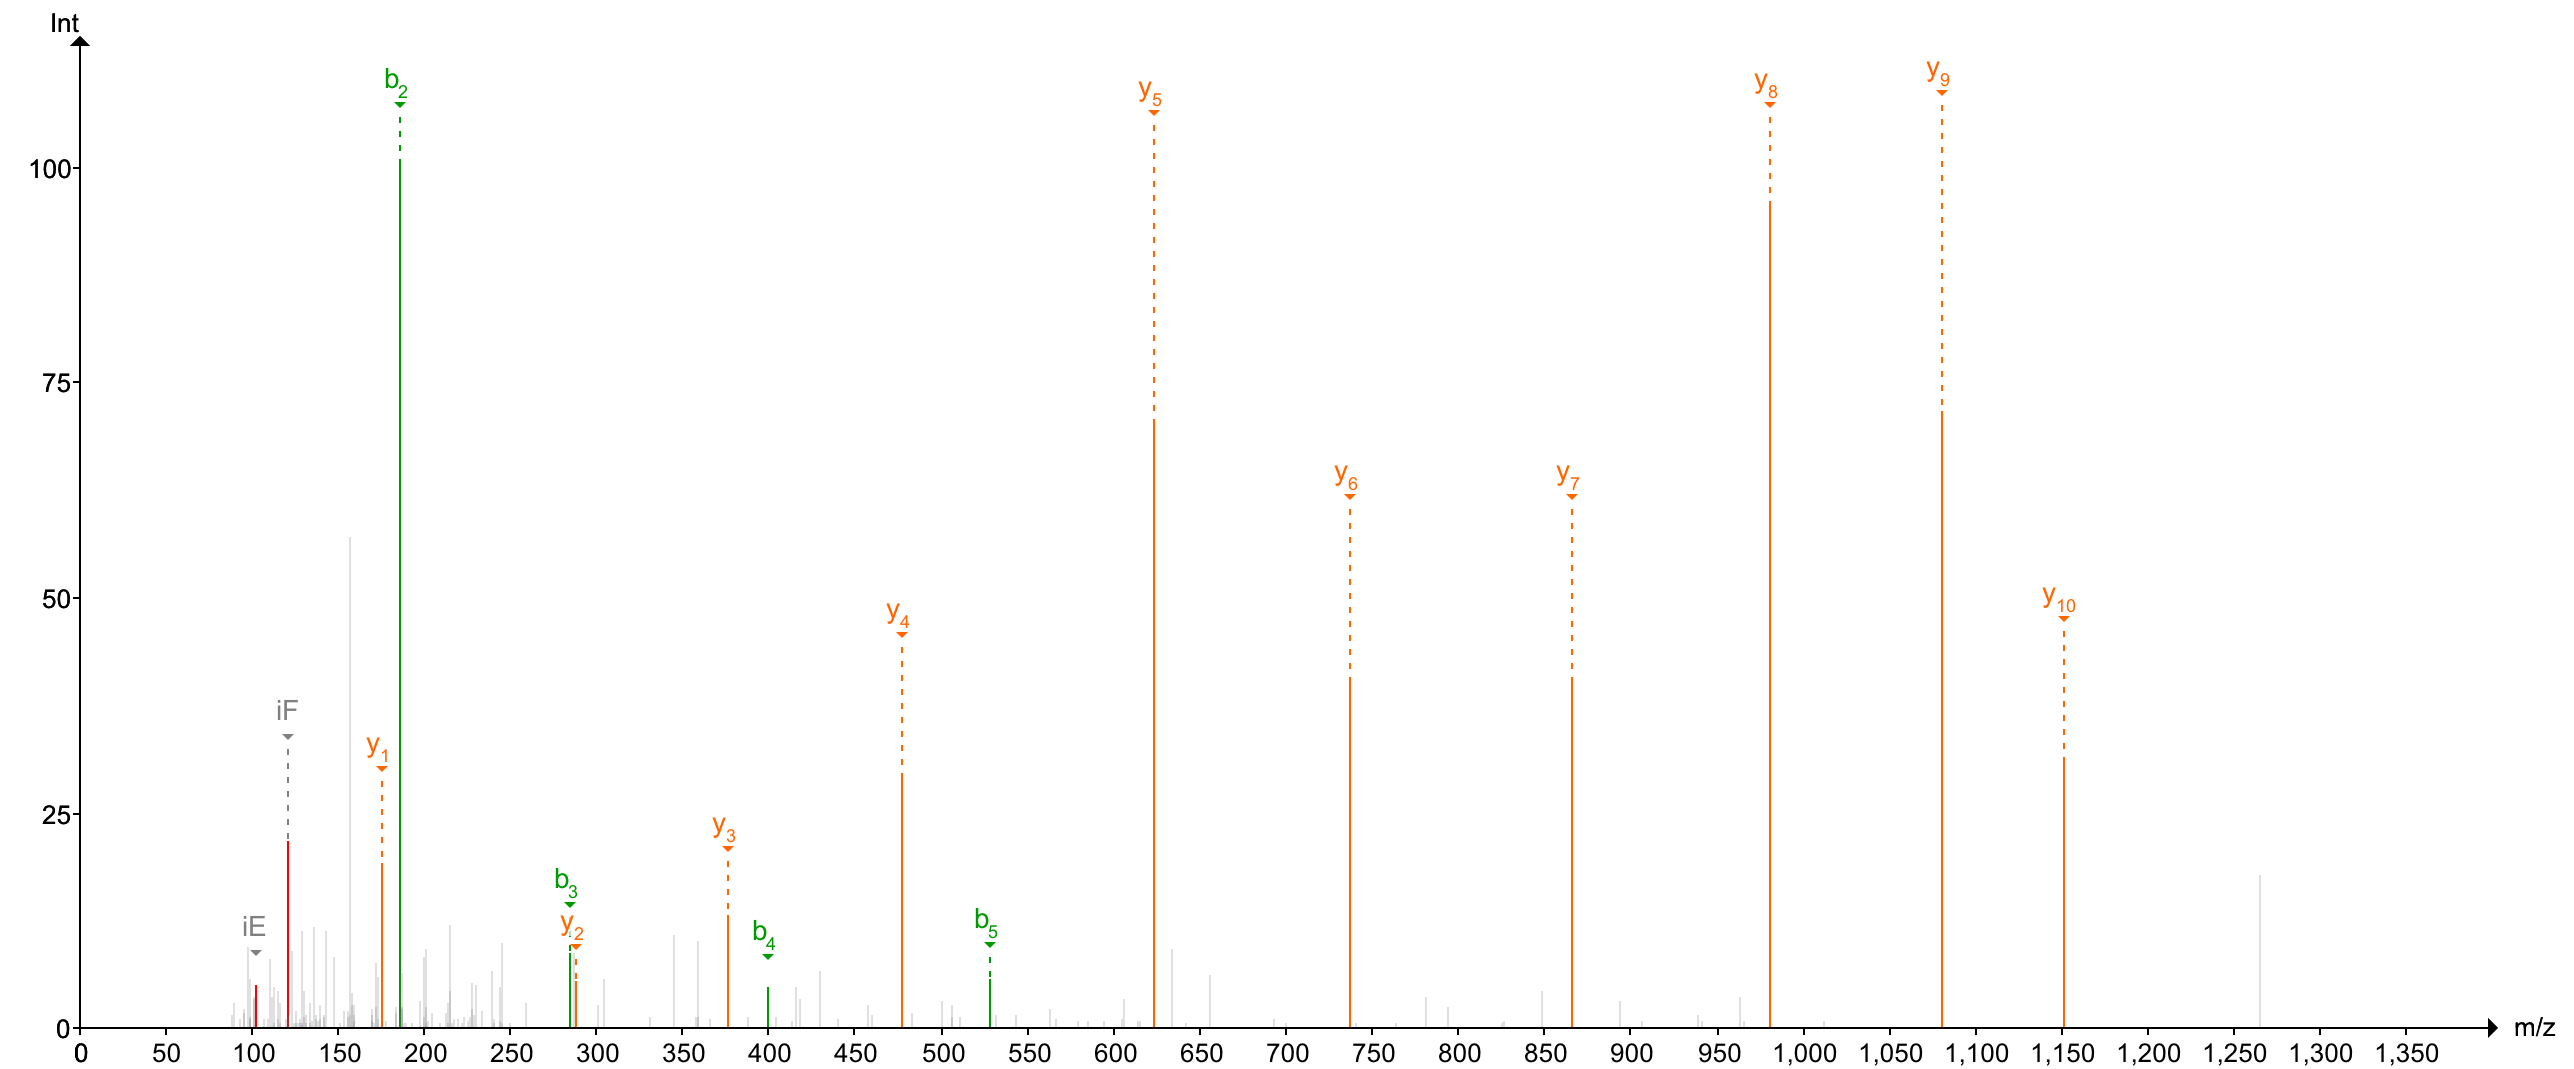

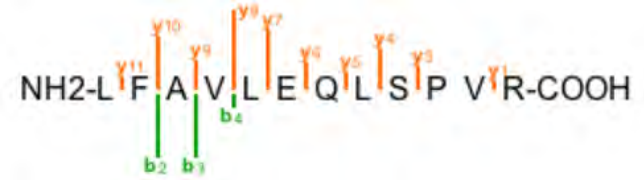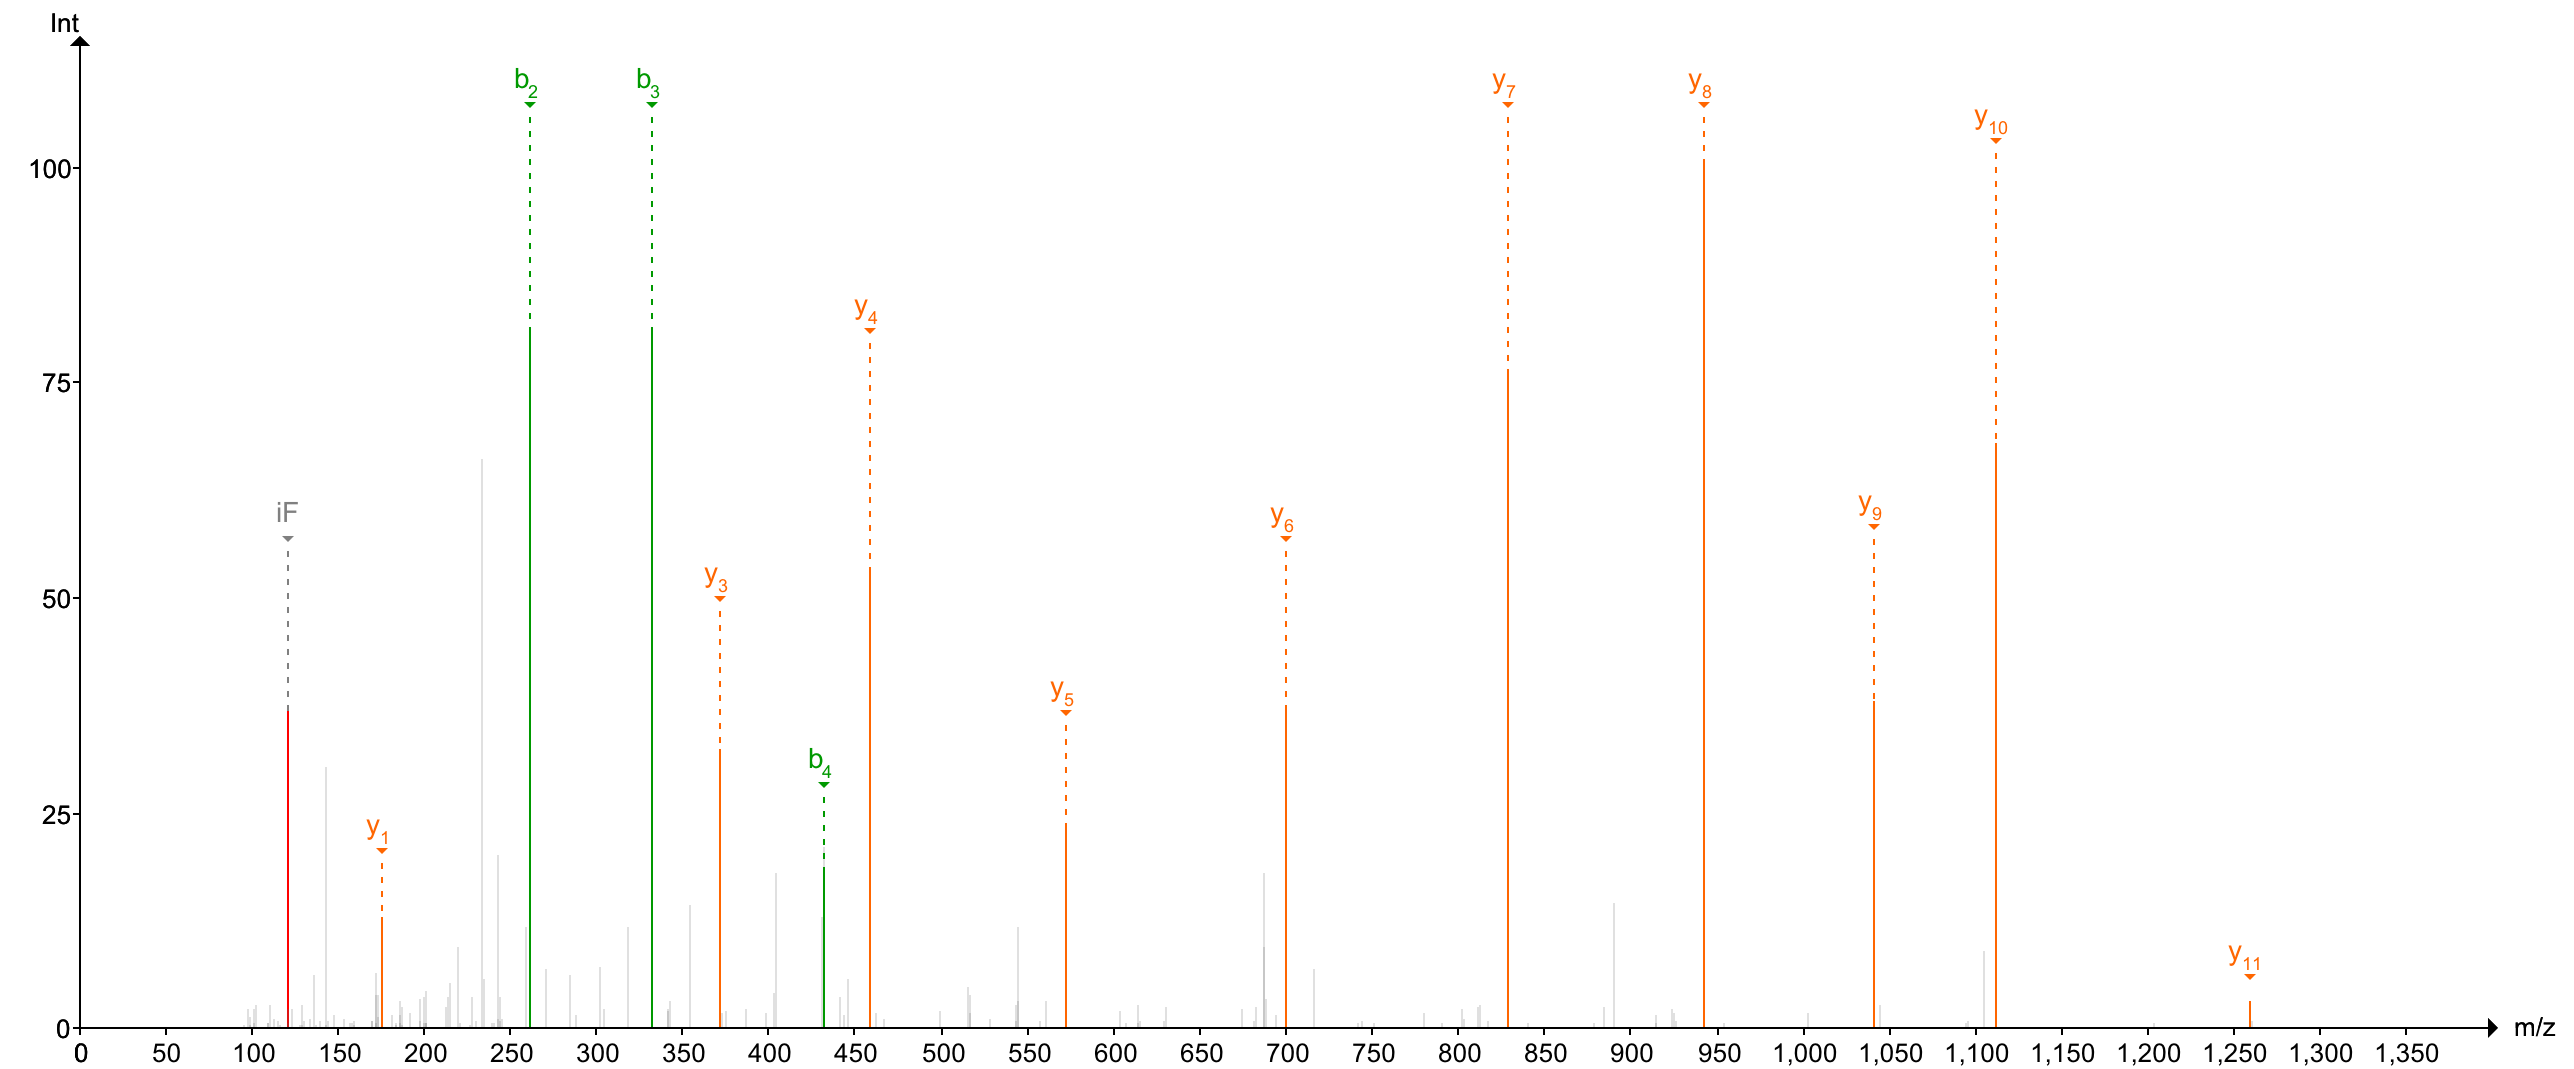



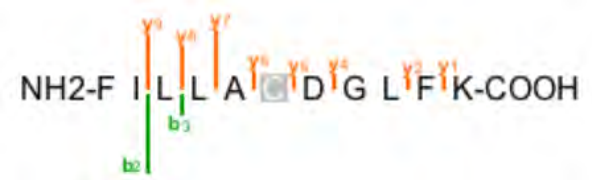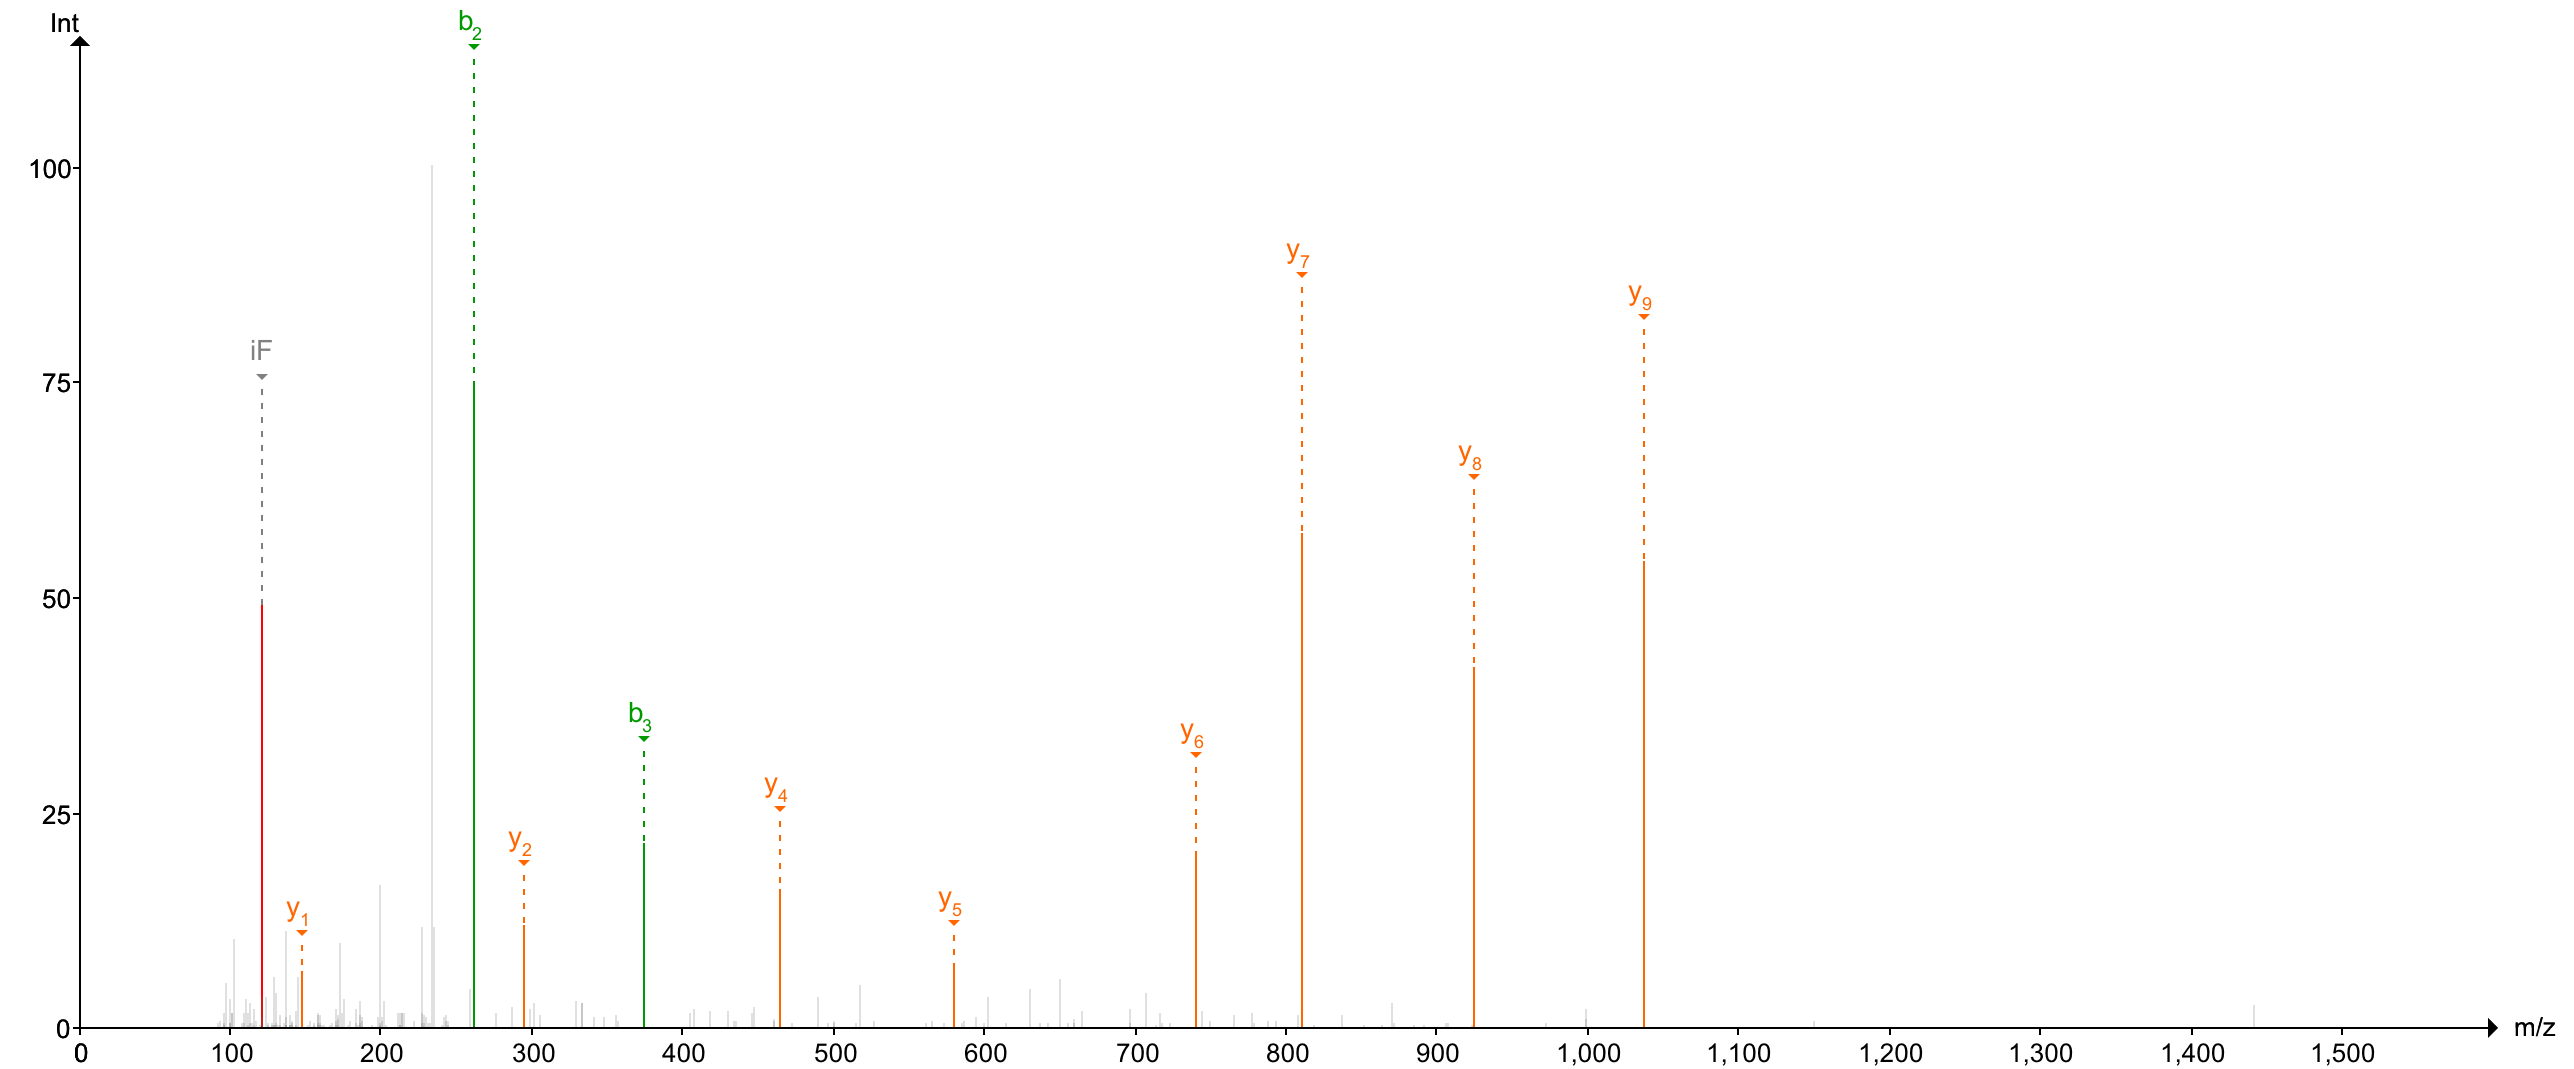

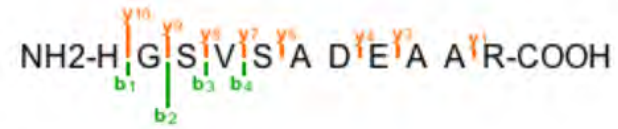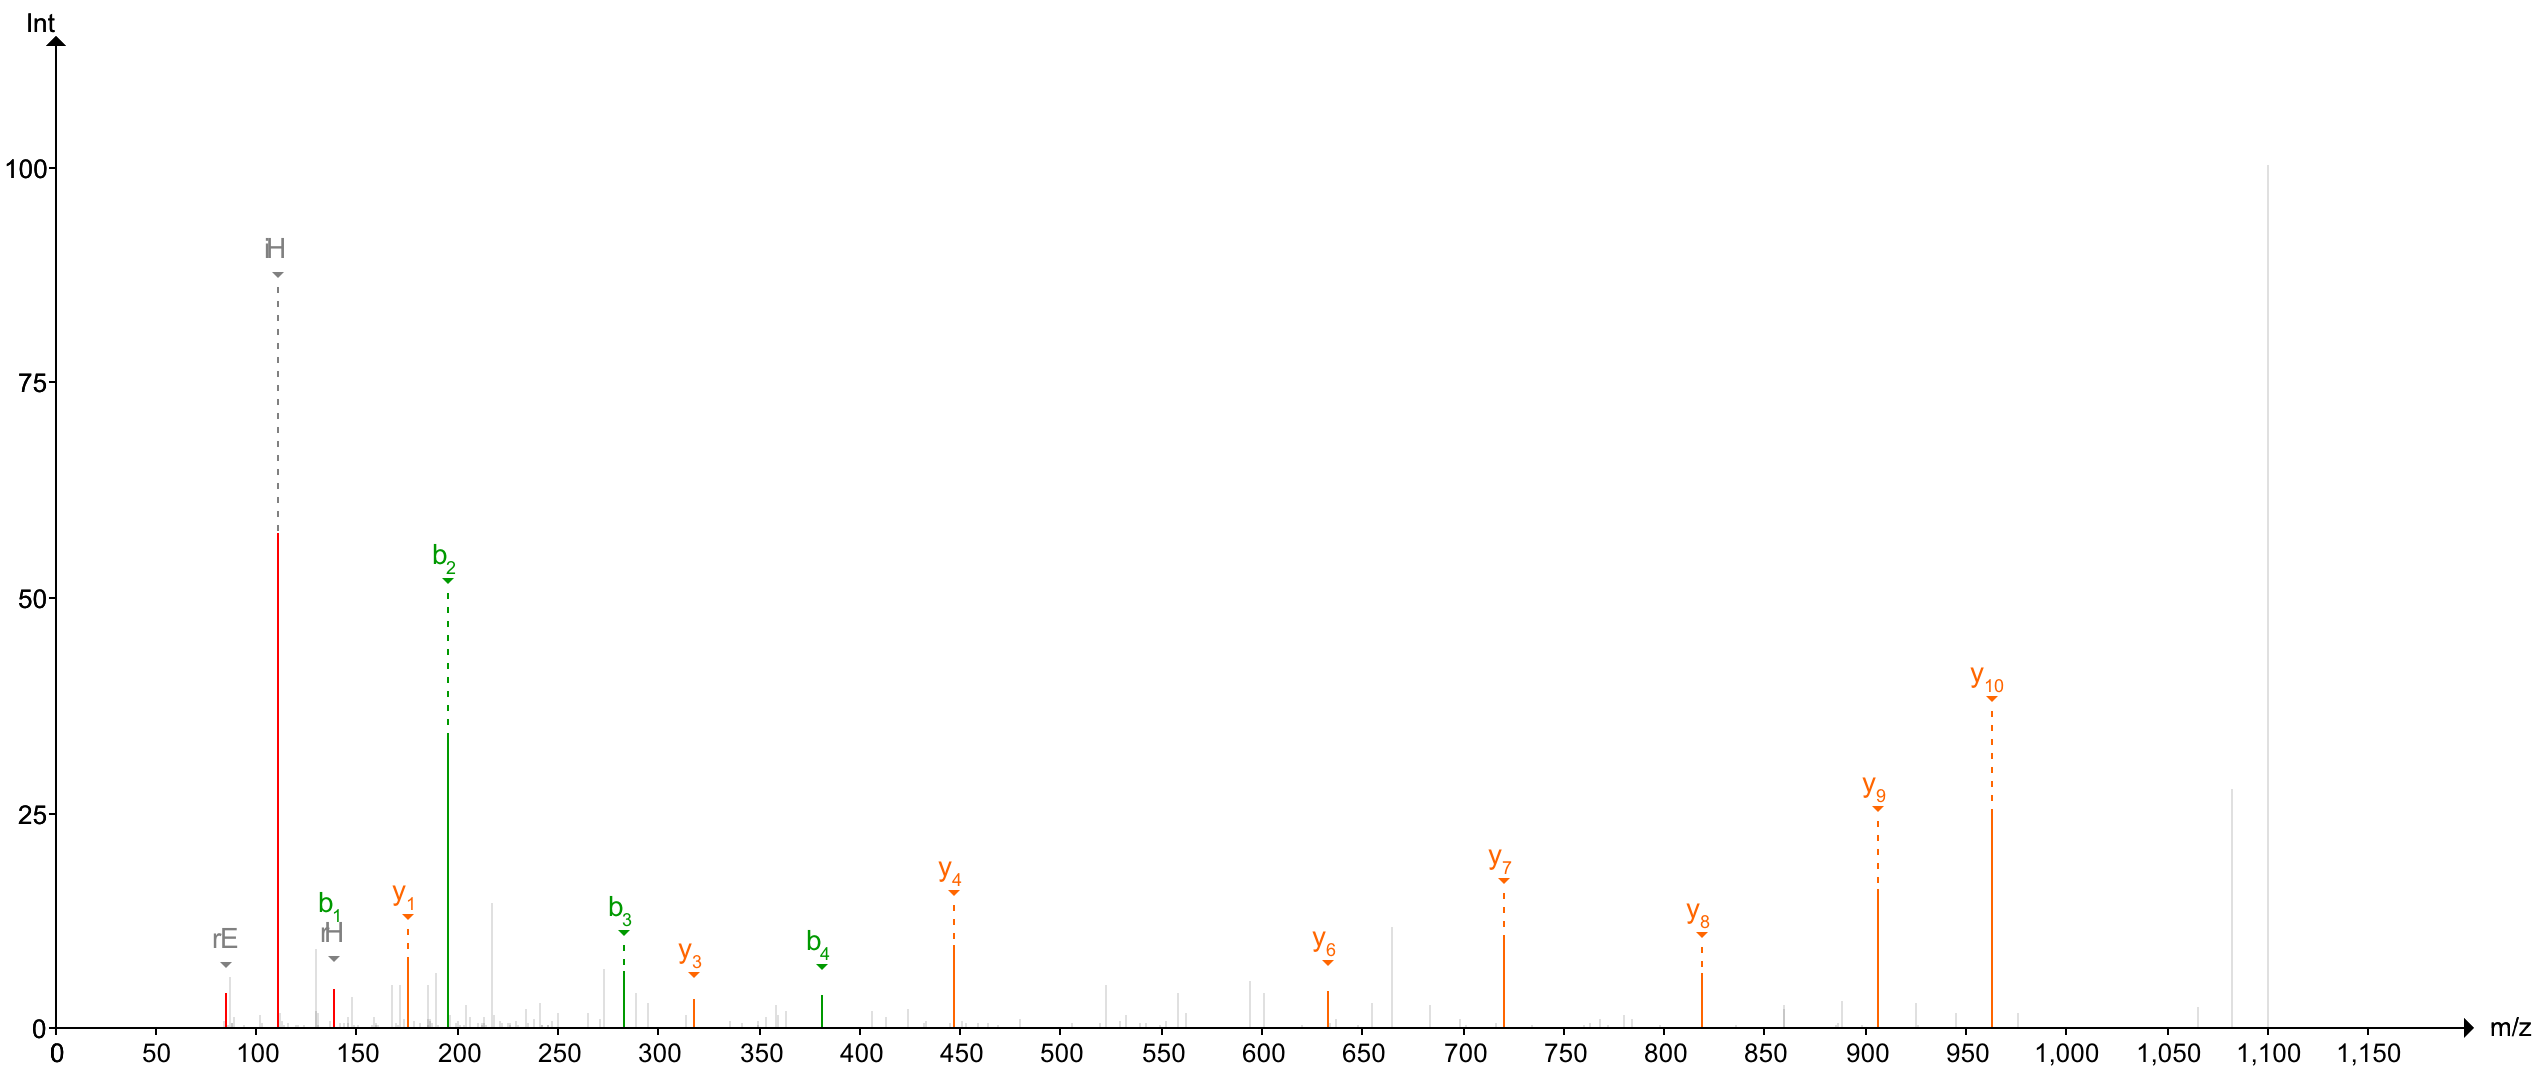

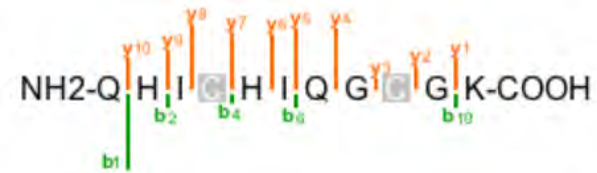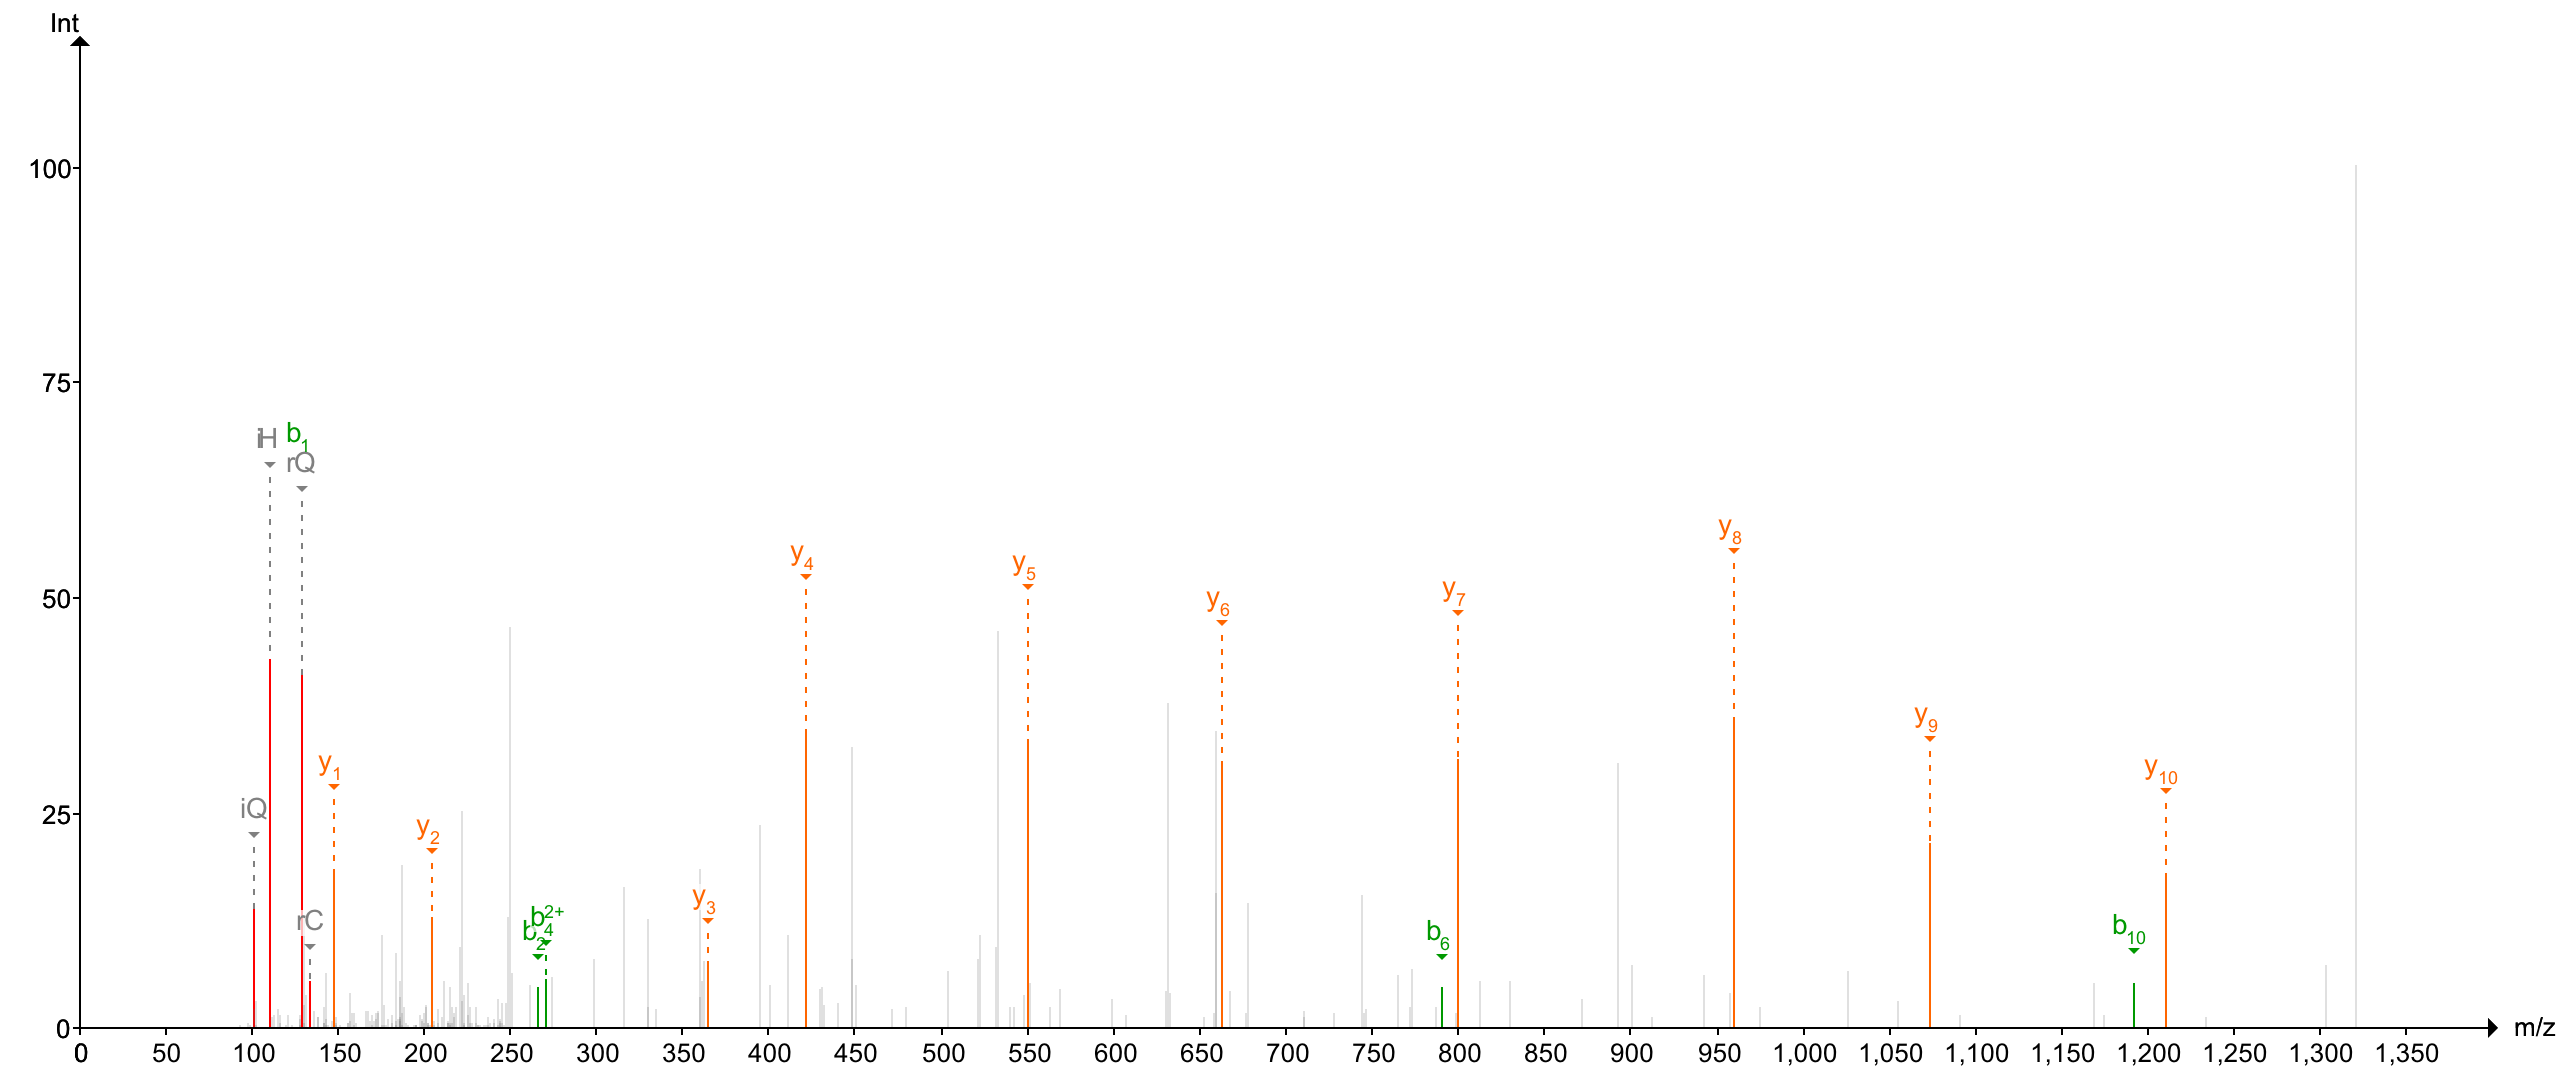

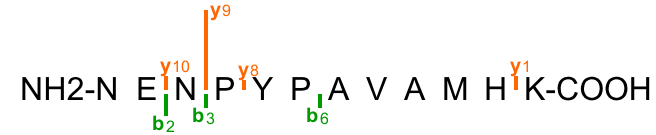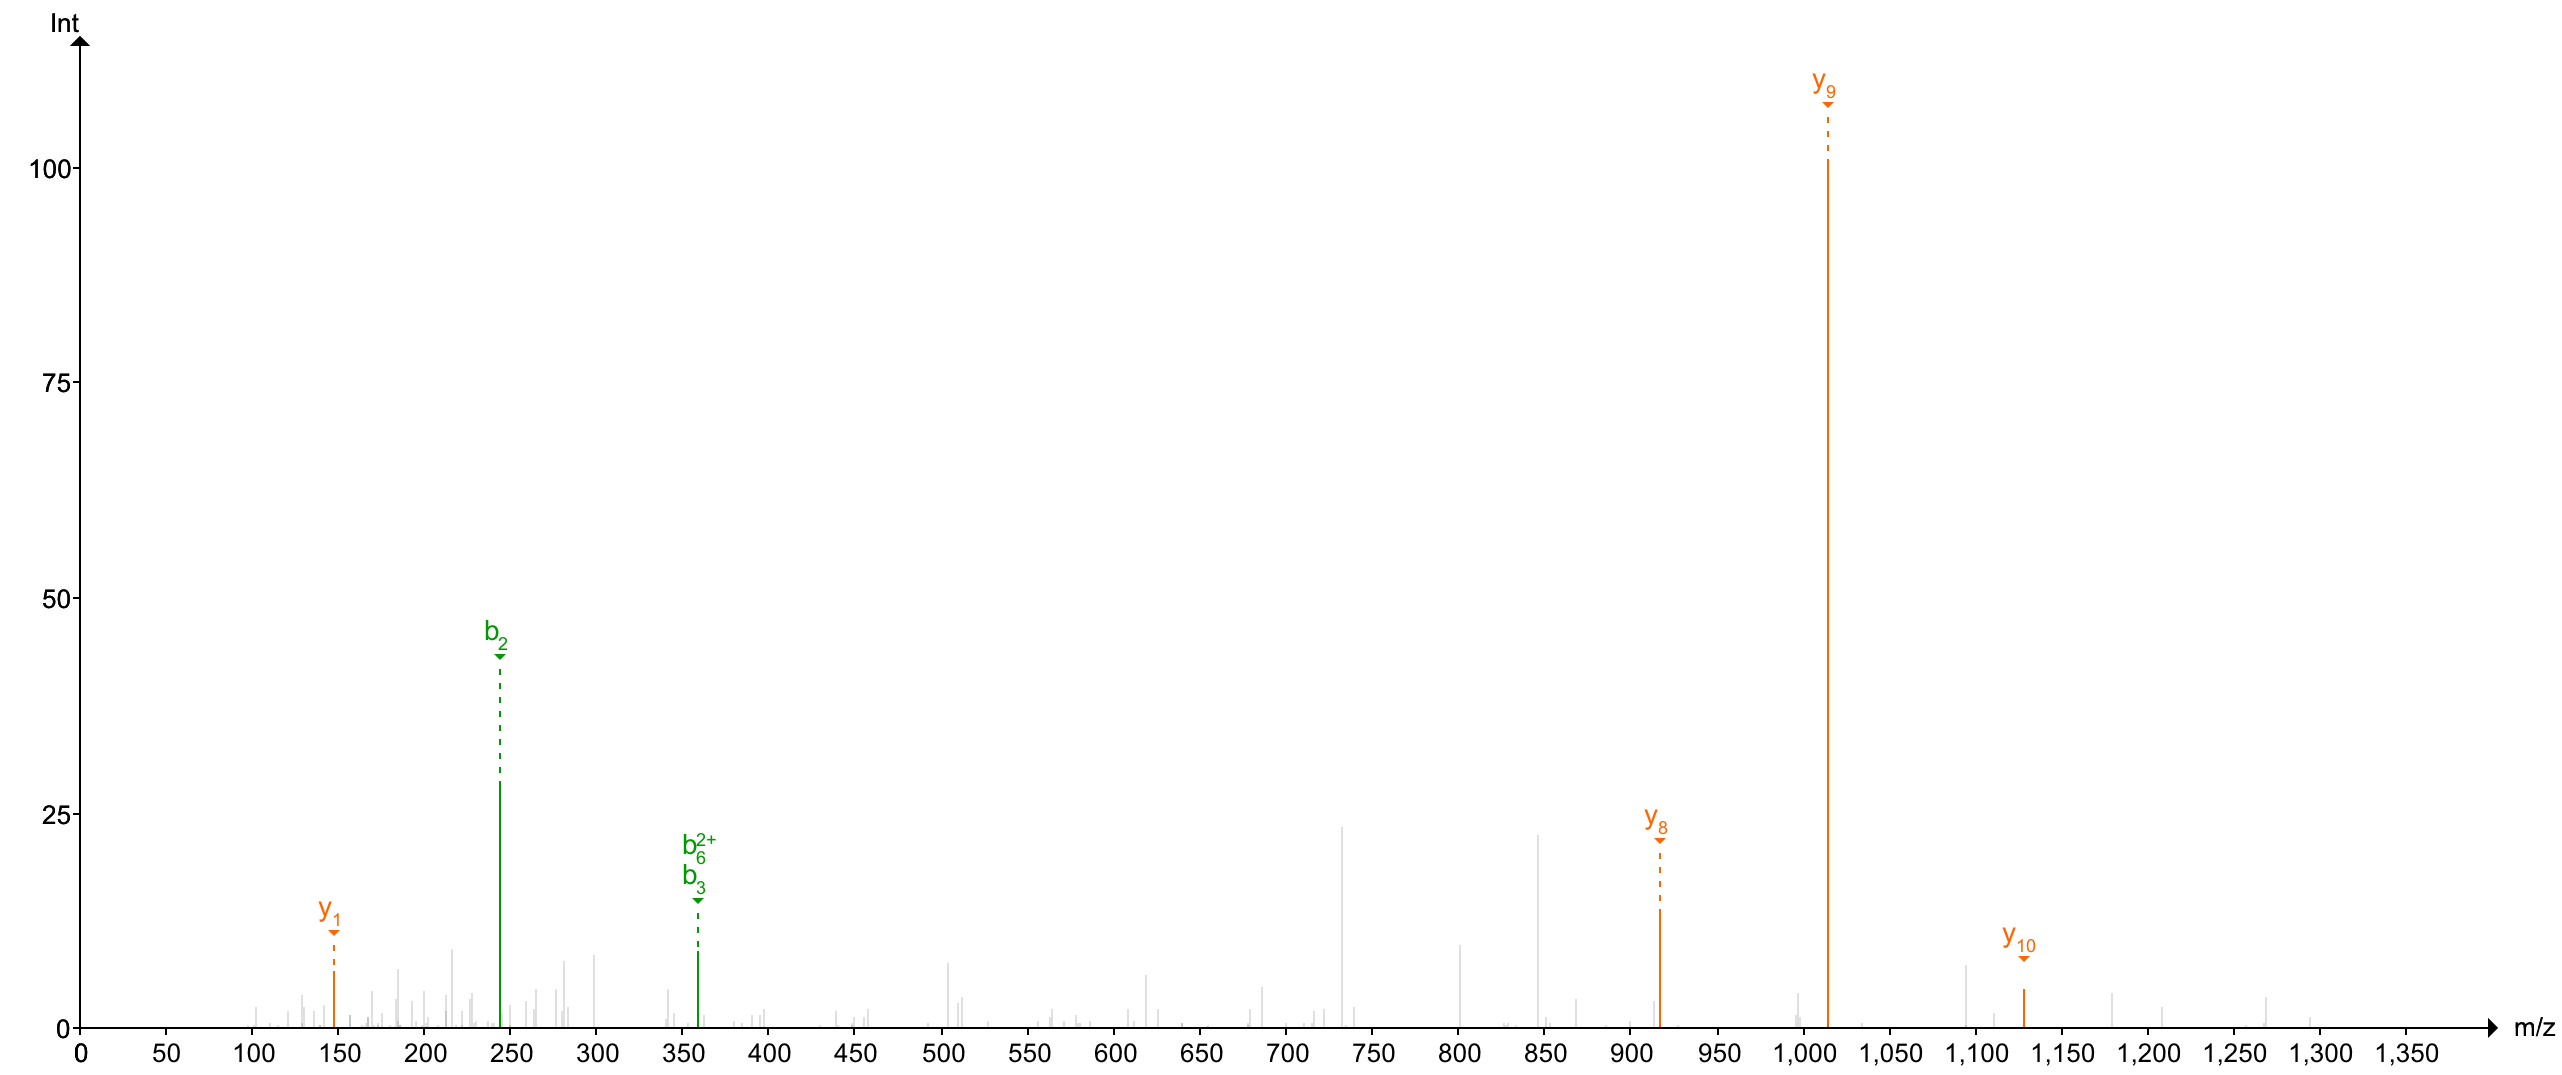

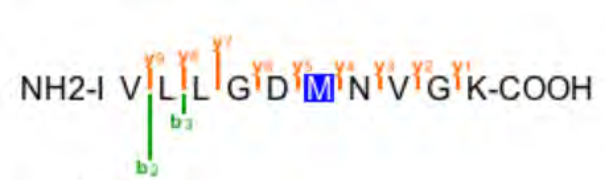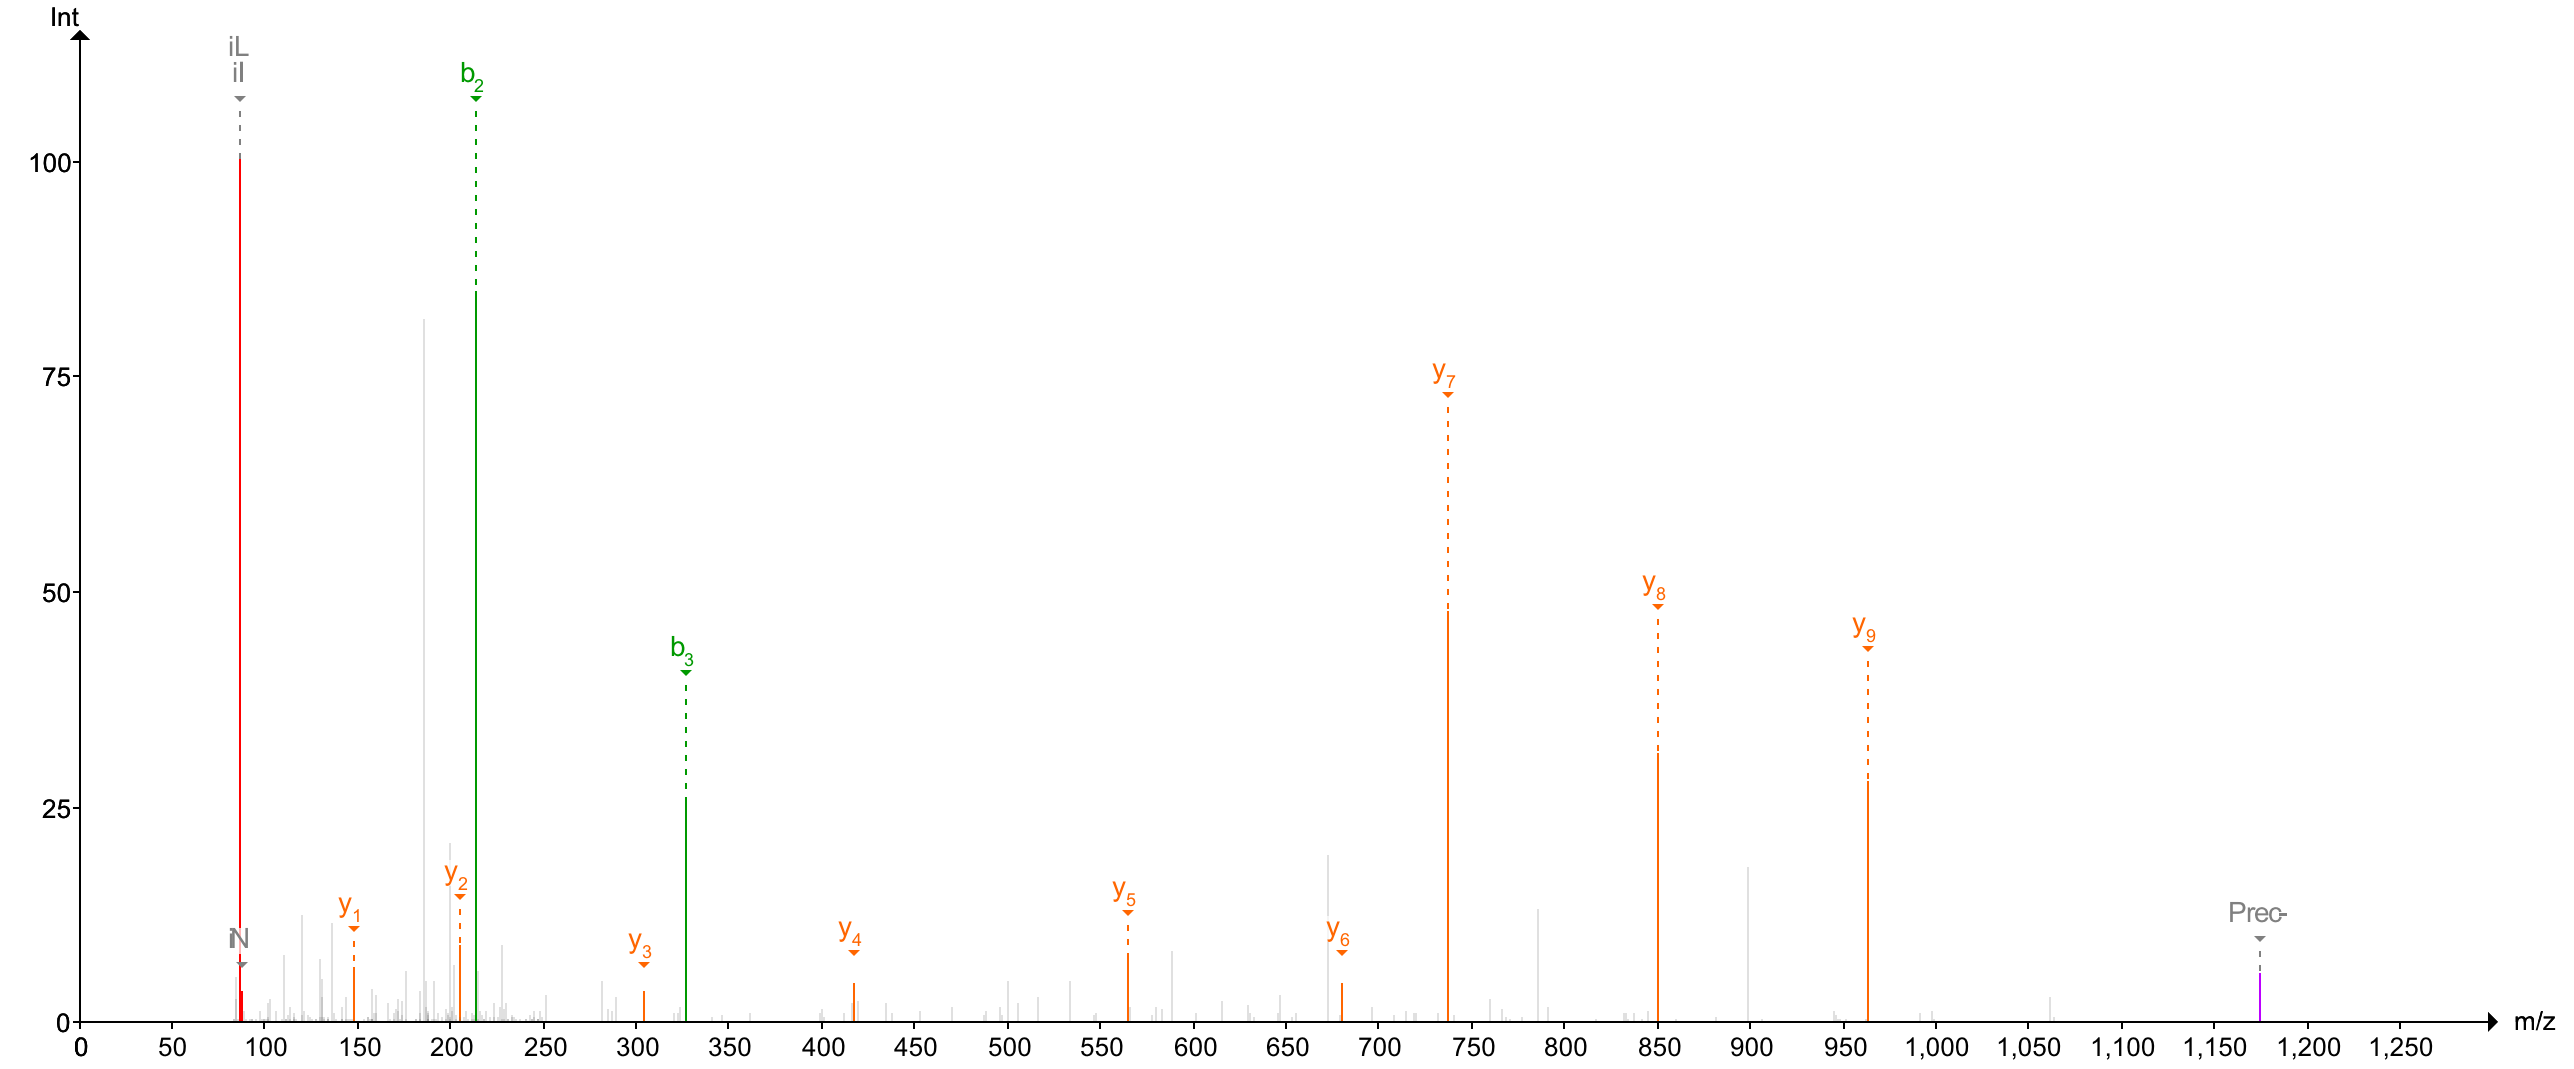

NH<sub>2</sub>-V L V P Q I P R-COOH

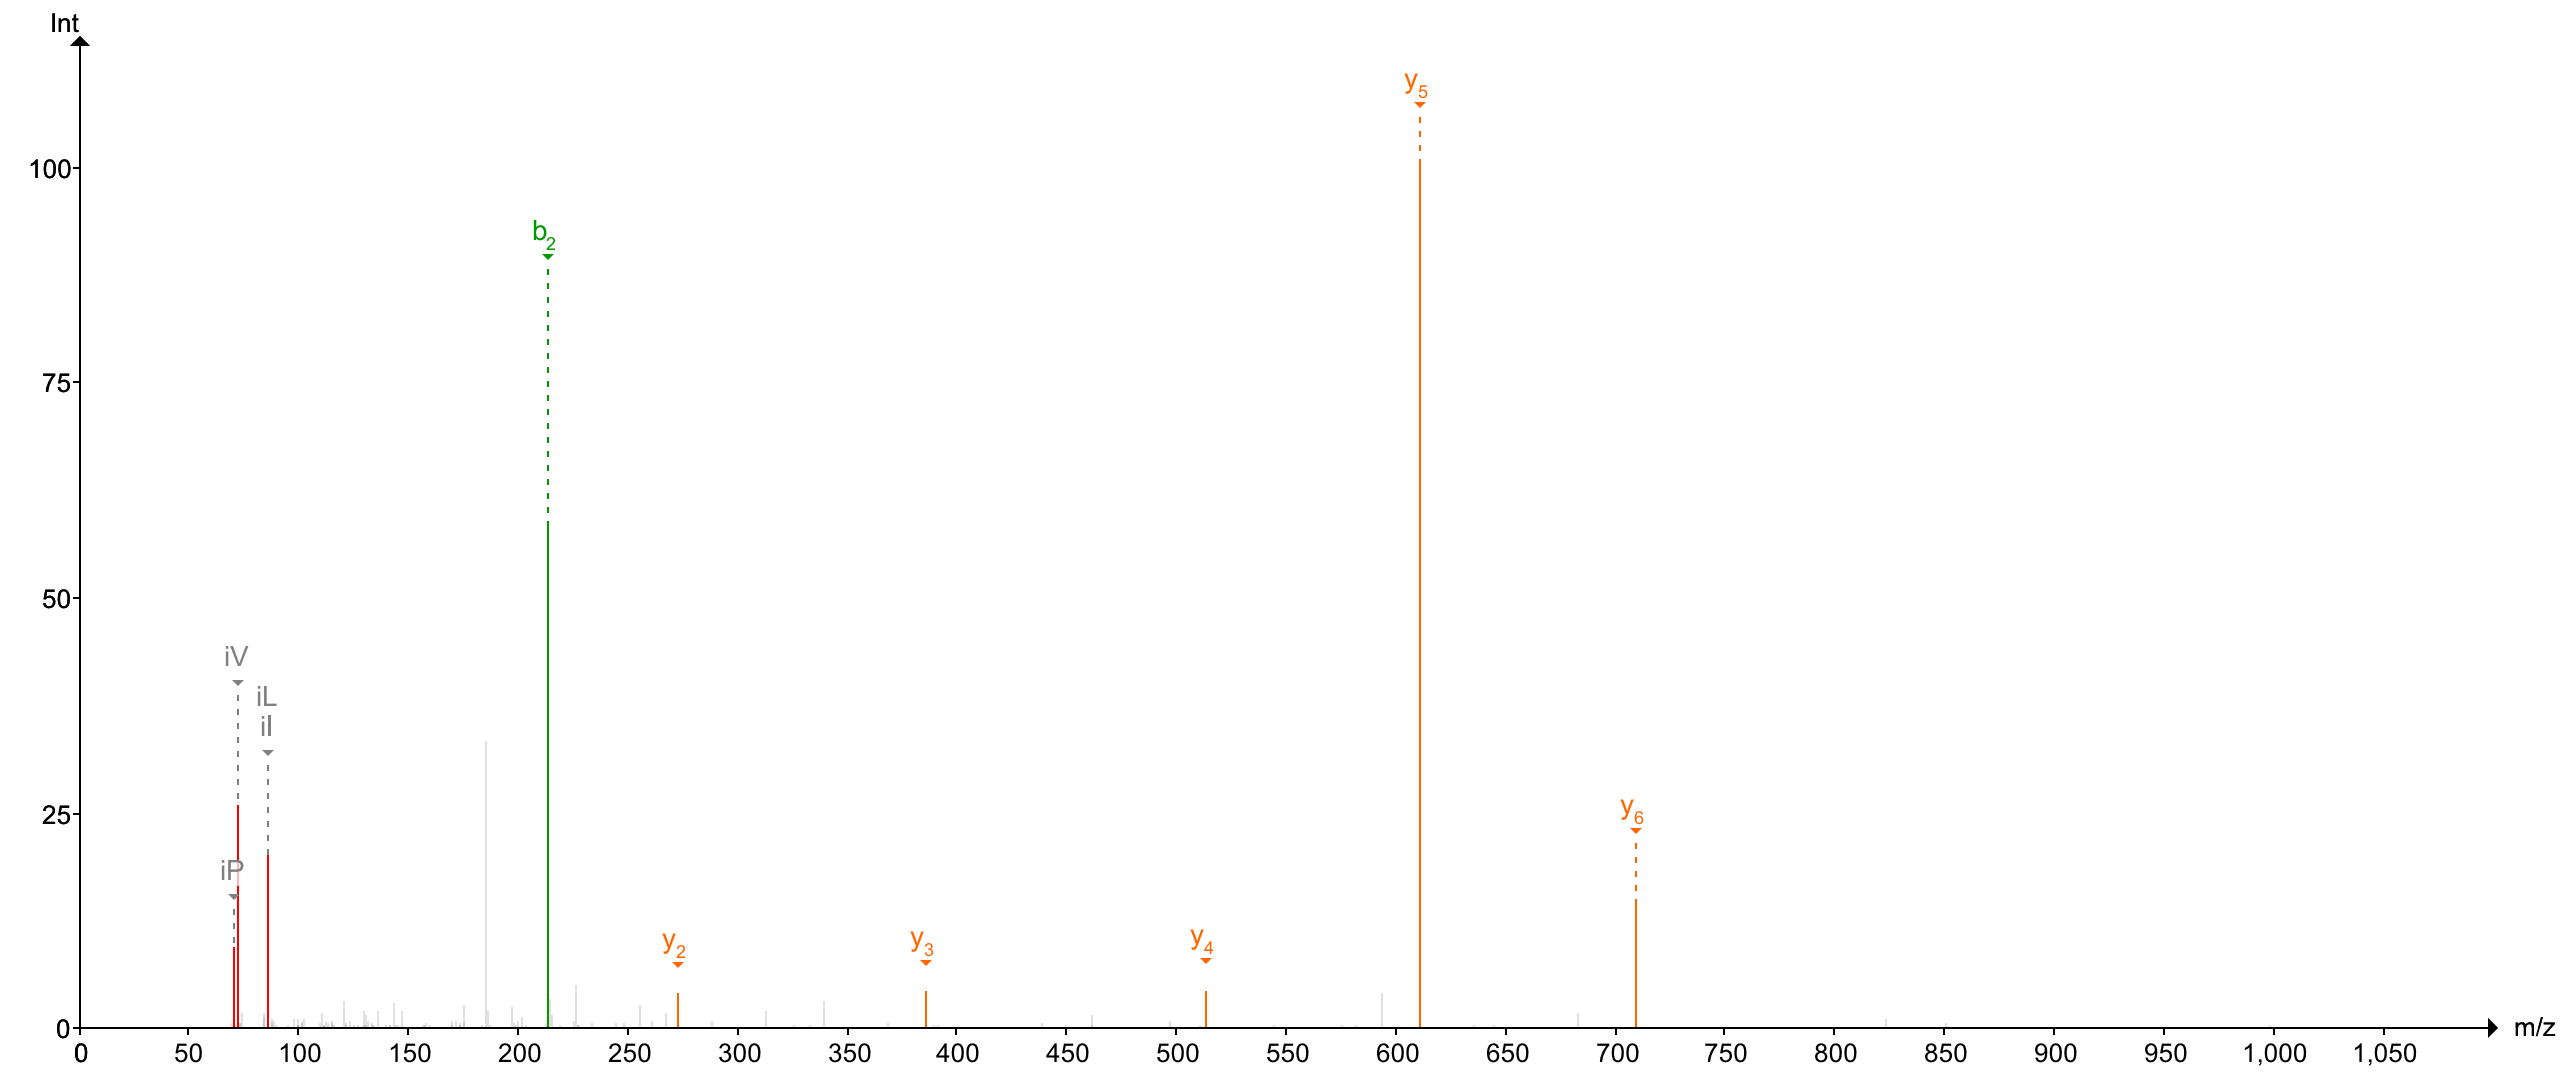

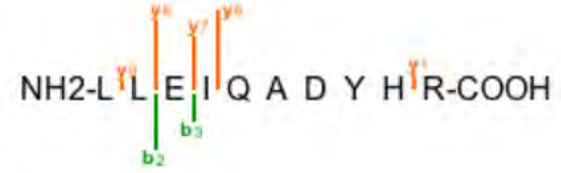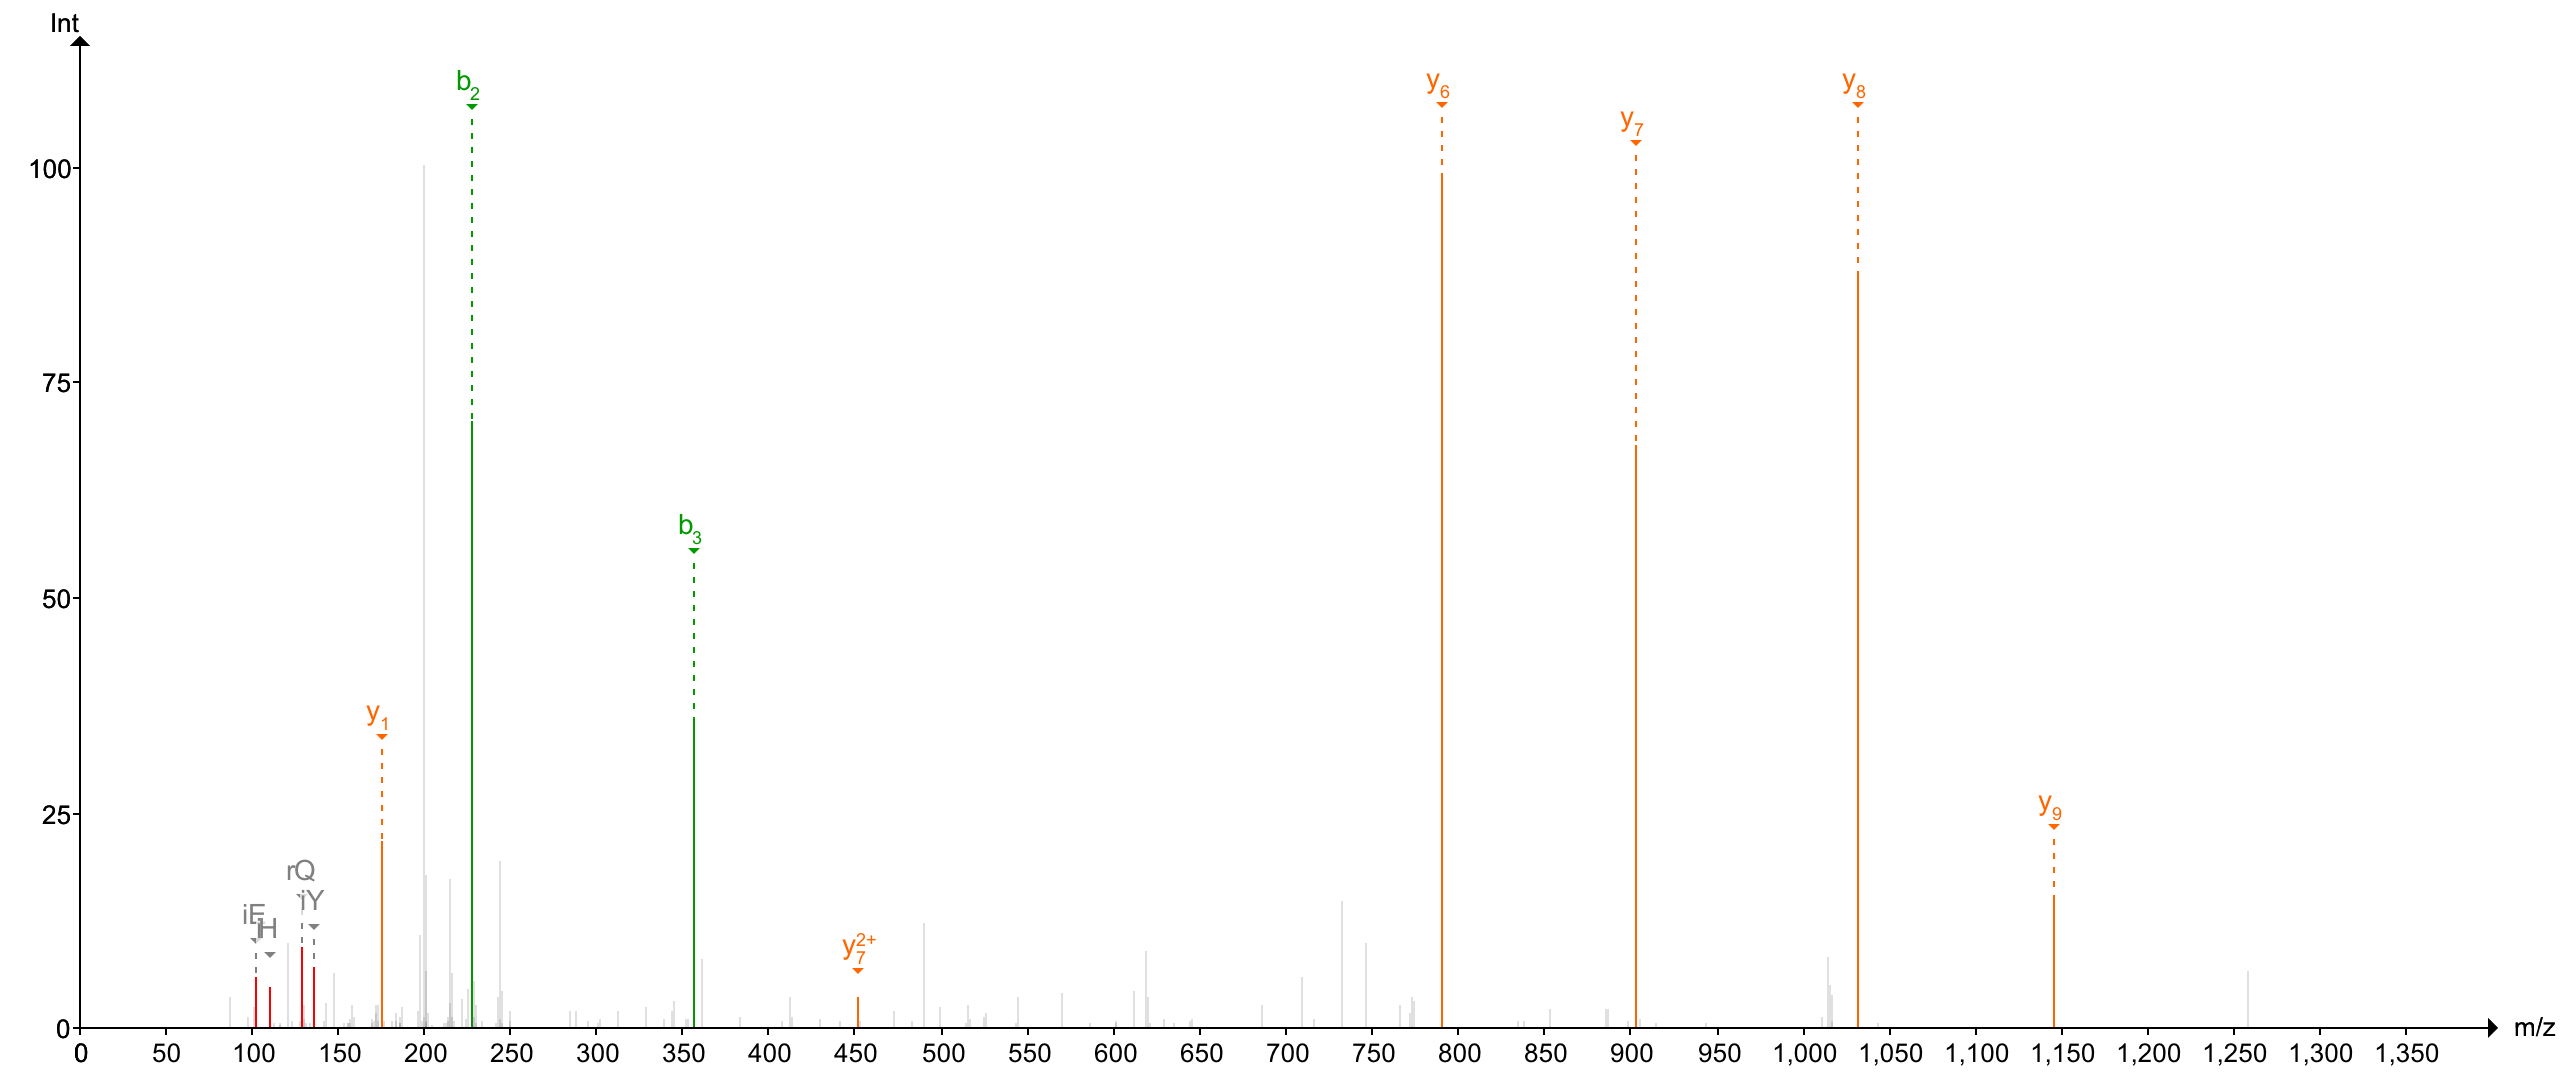

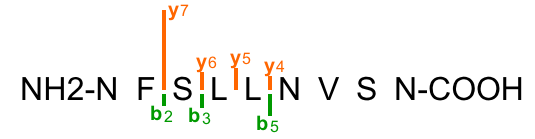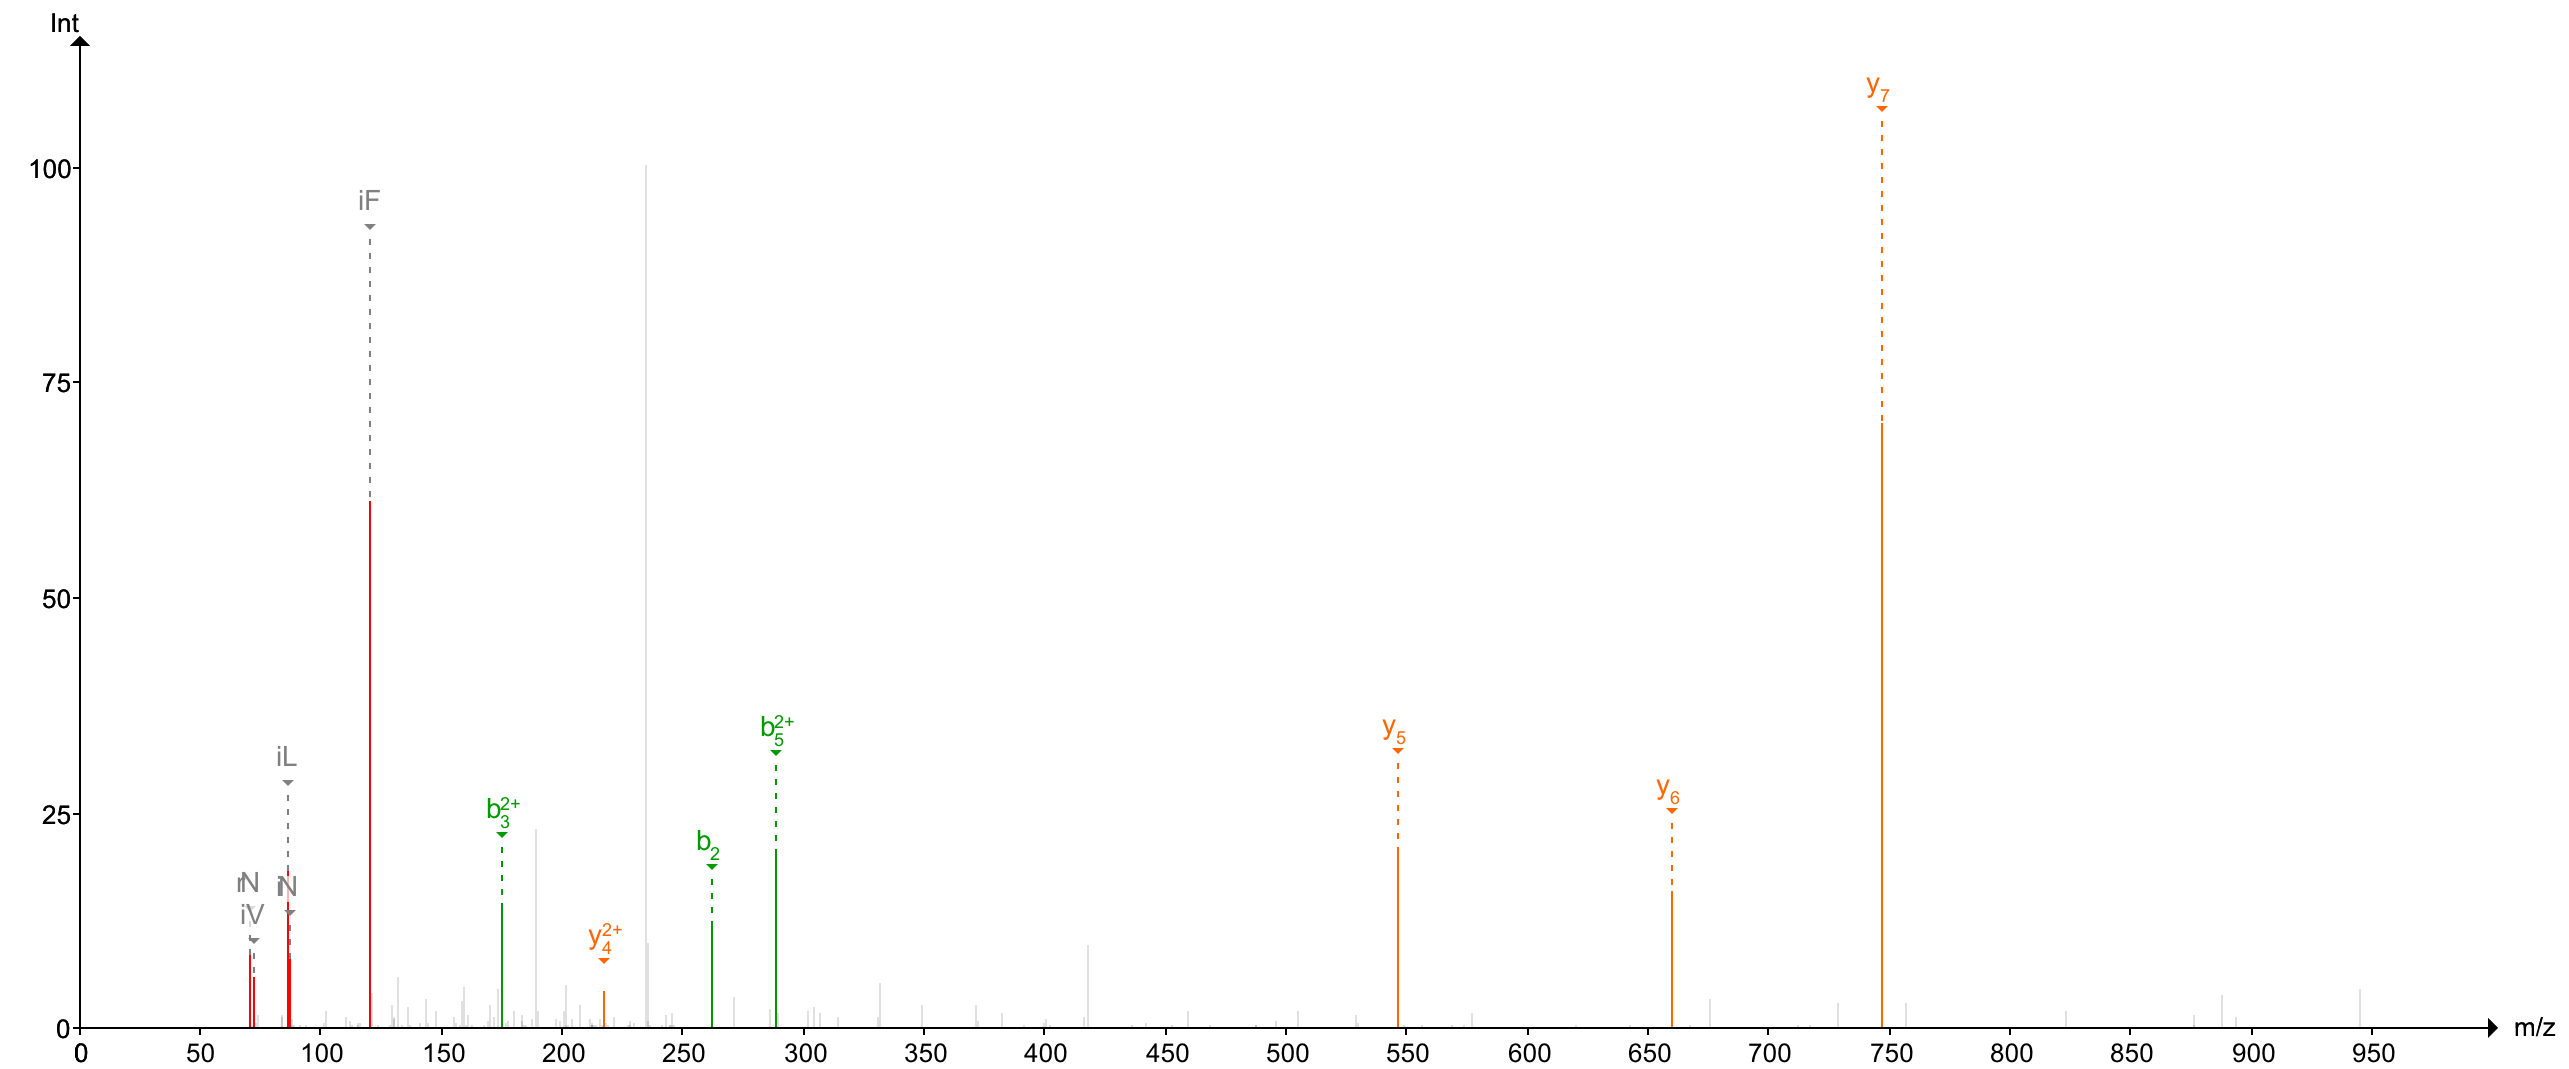



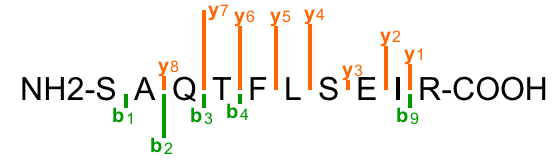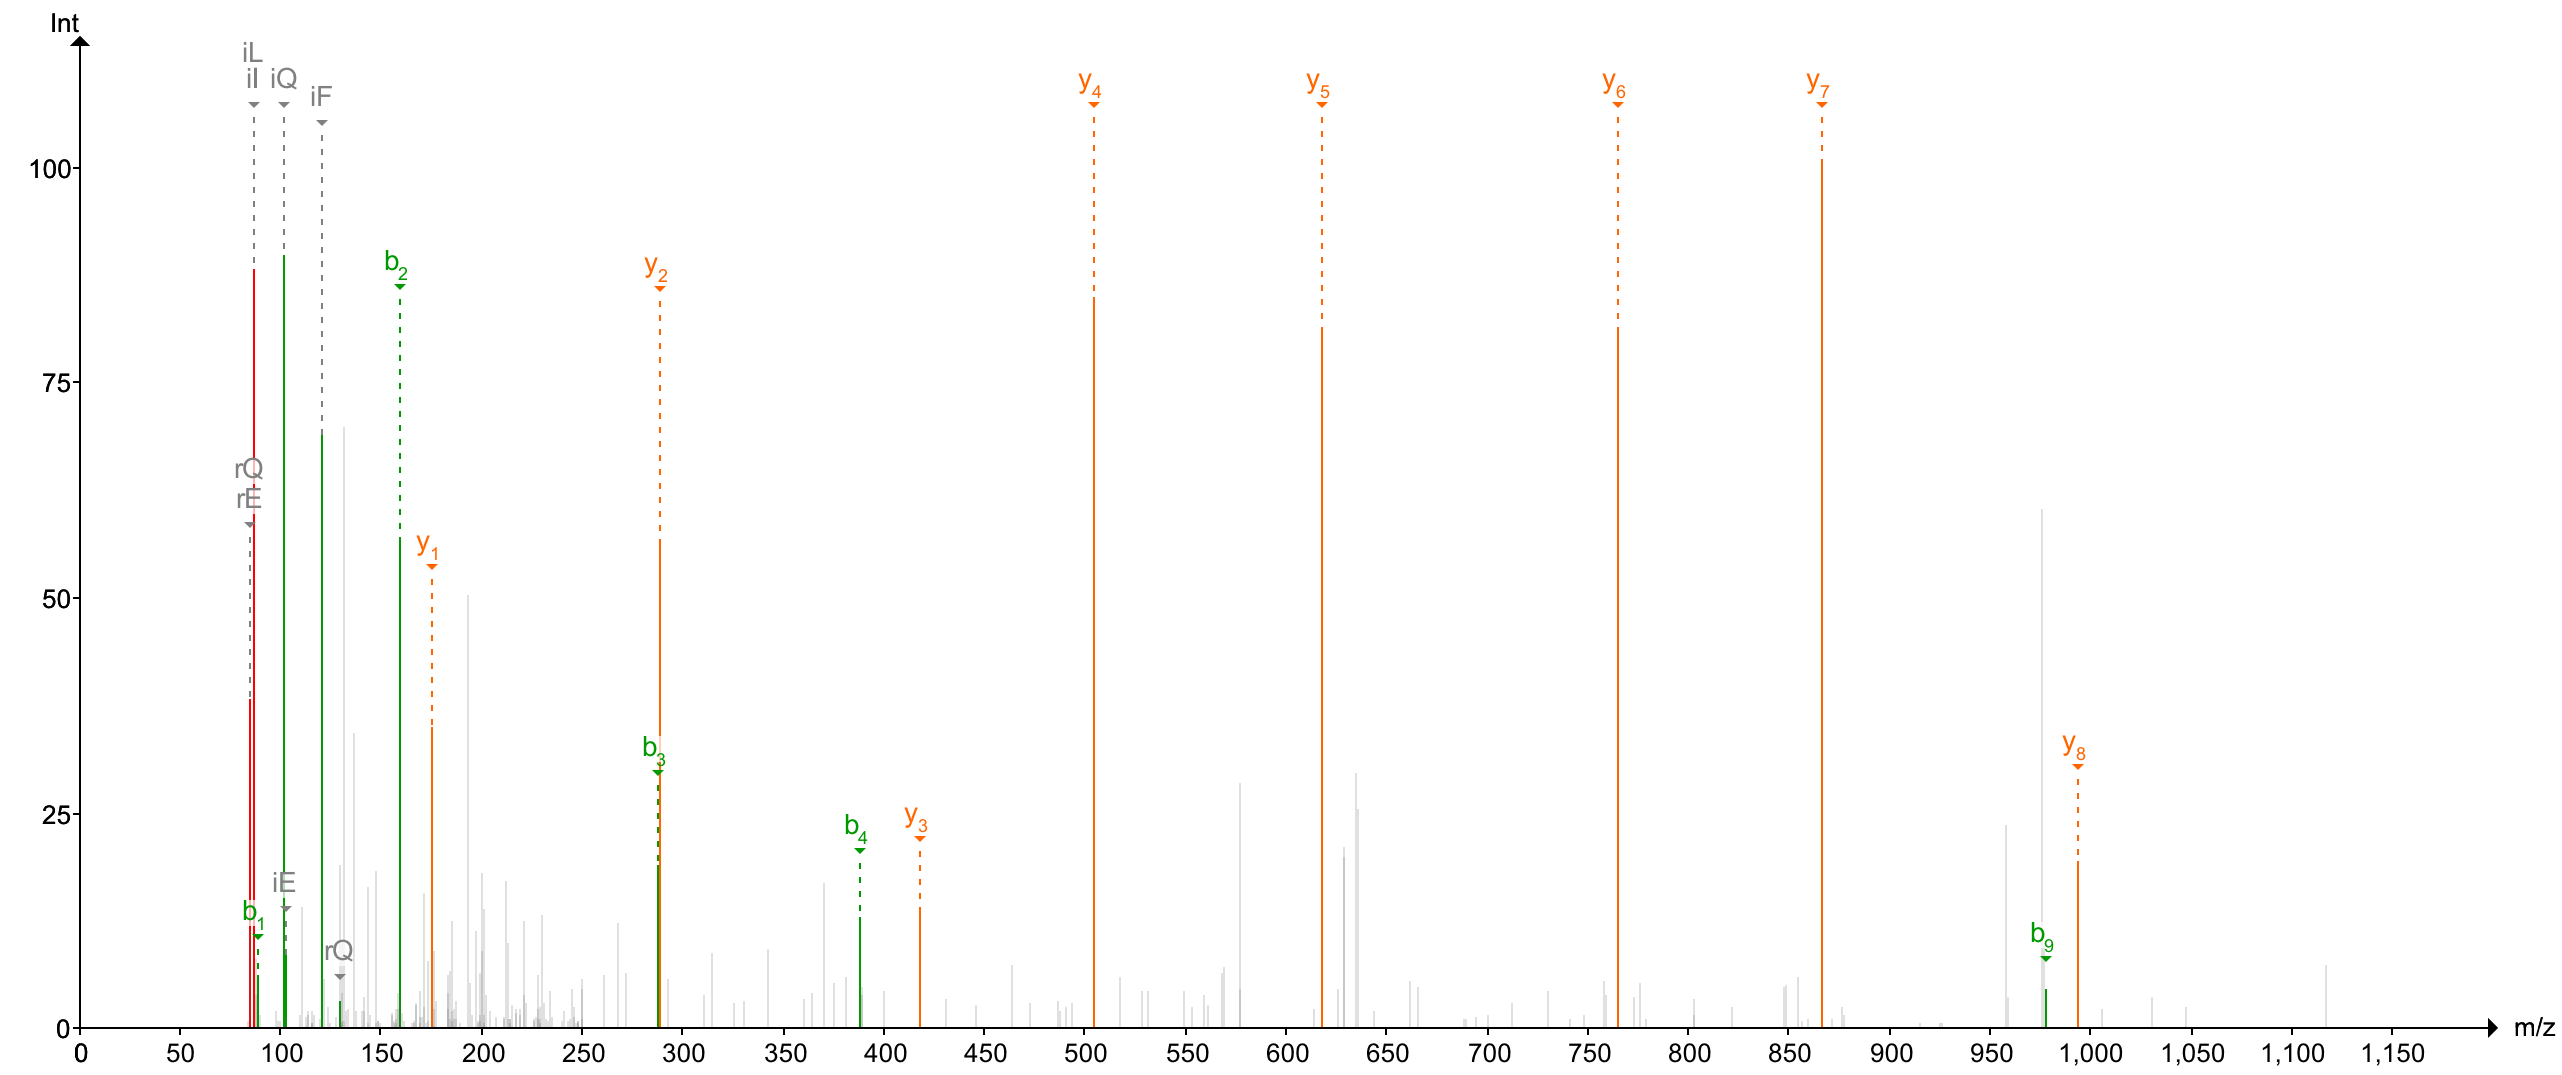

NH<sub>2</sub>-Y I **M** V P S G N **M** G V F D P T E I H N R-COOH

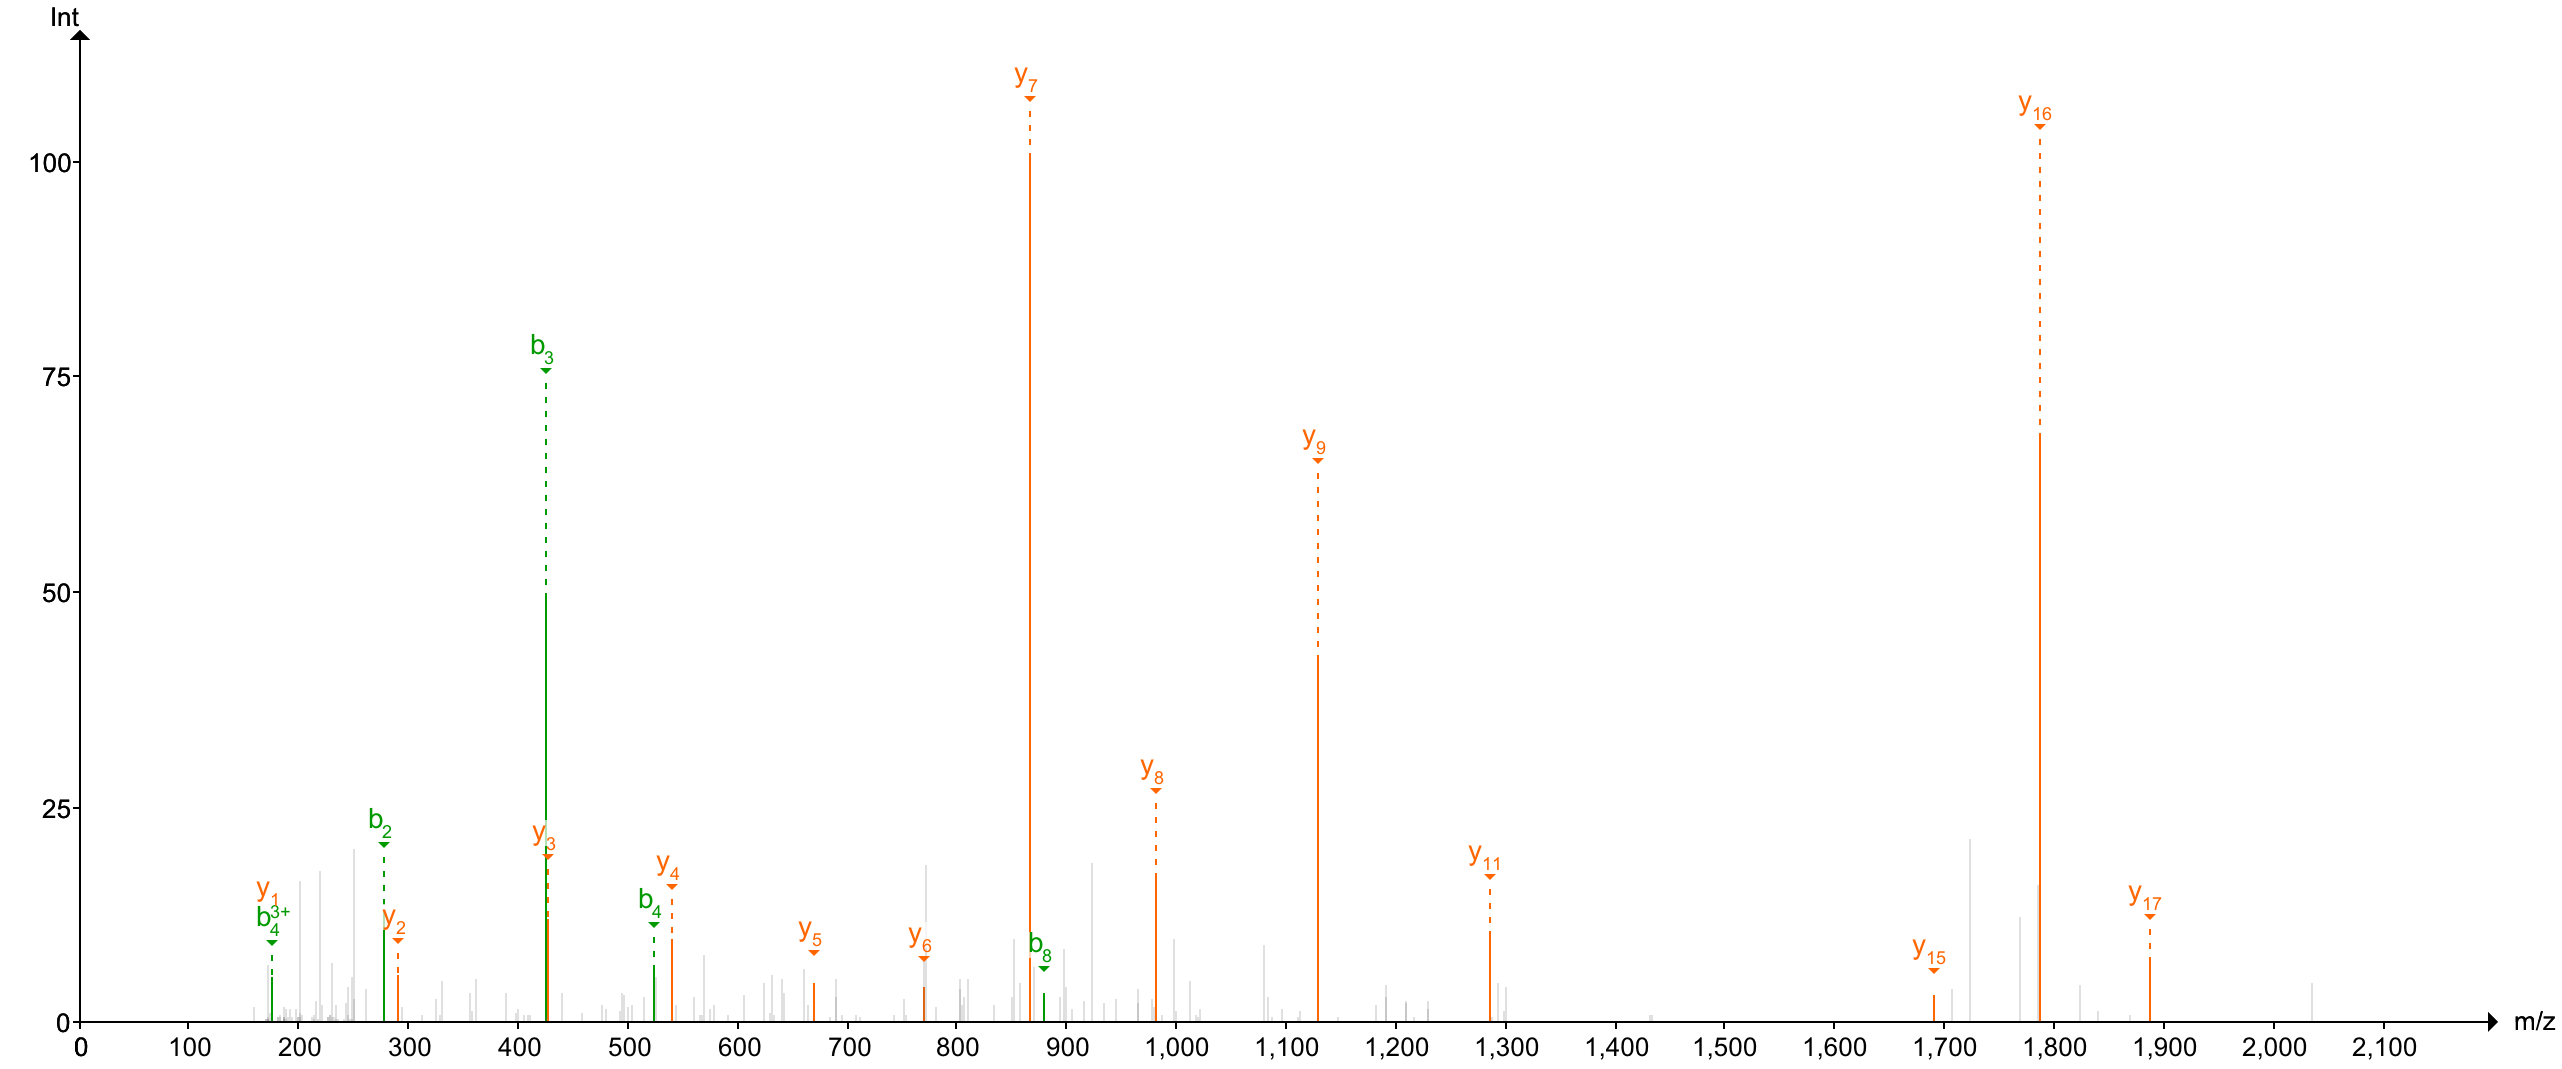

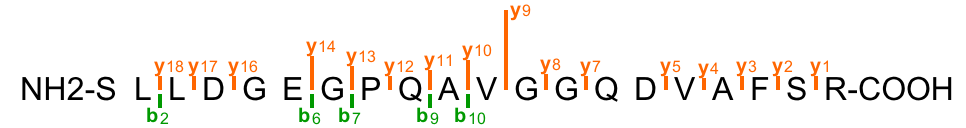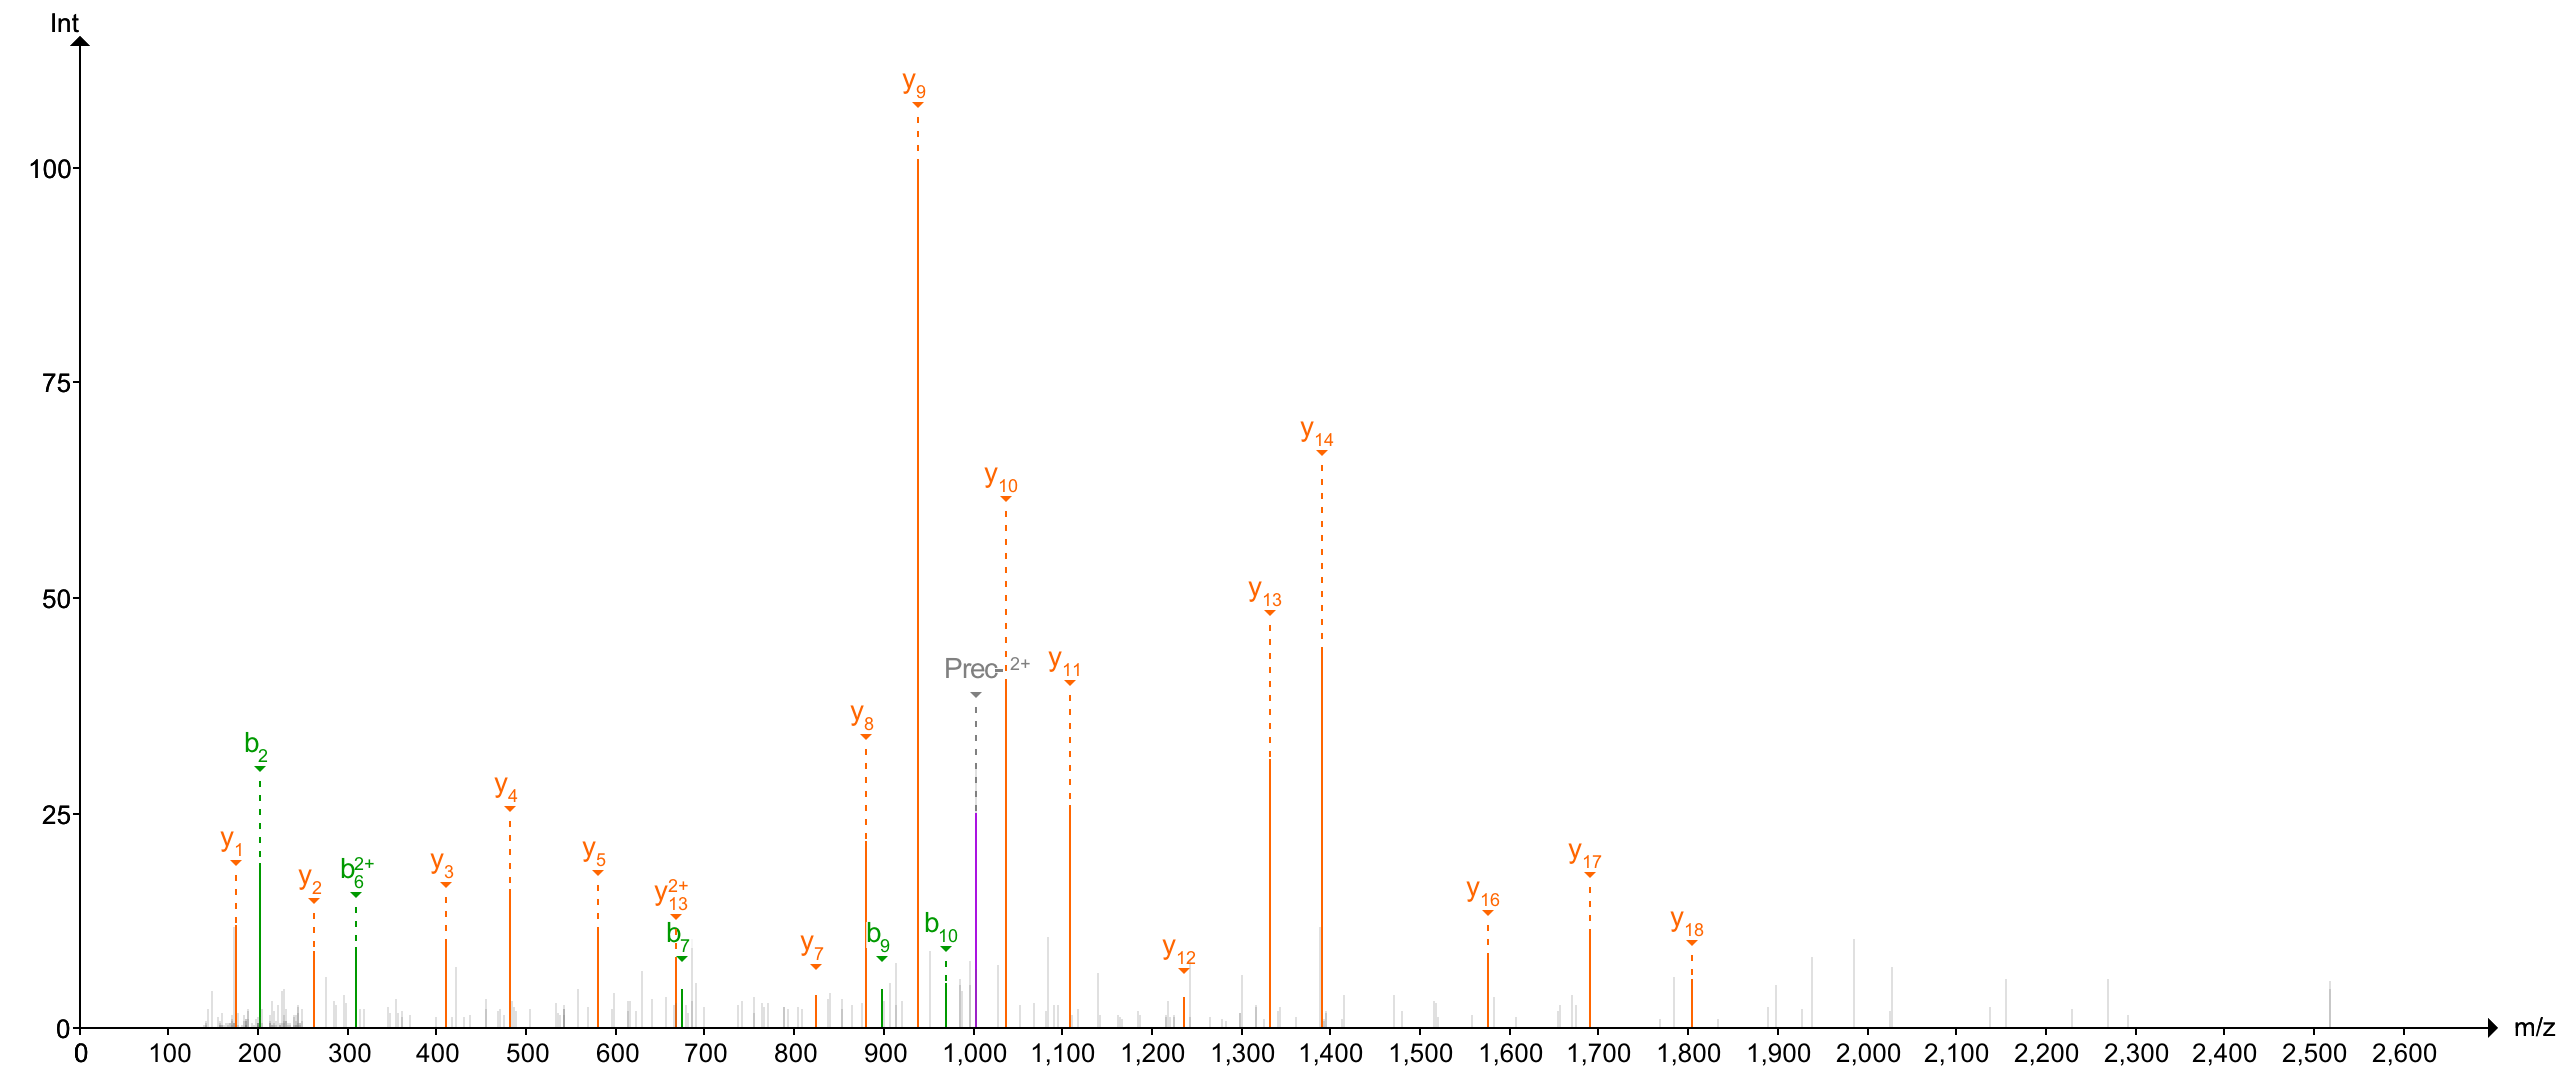

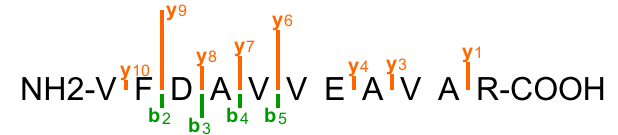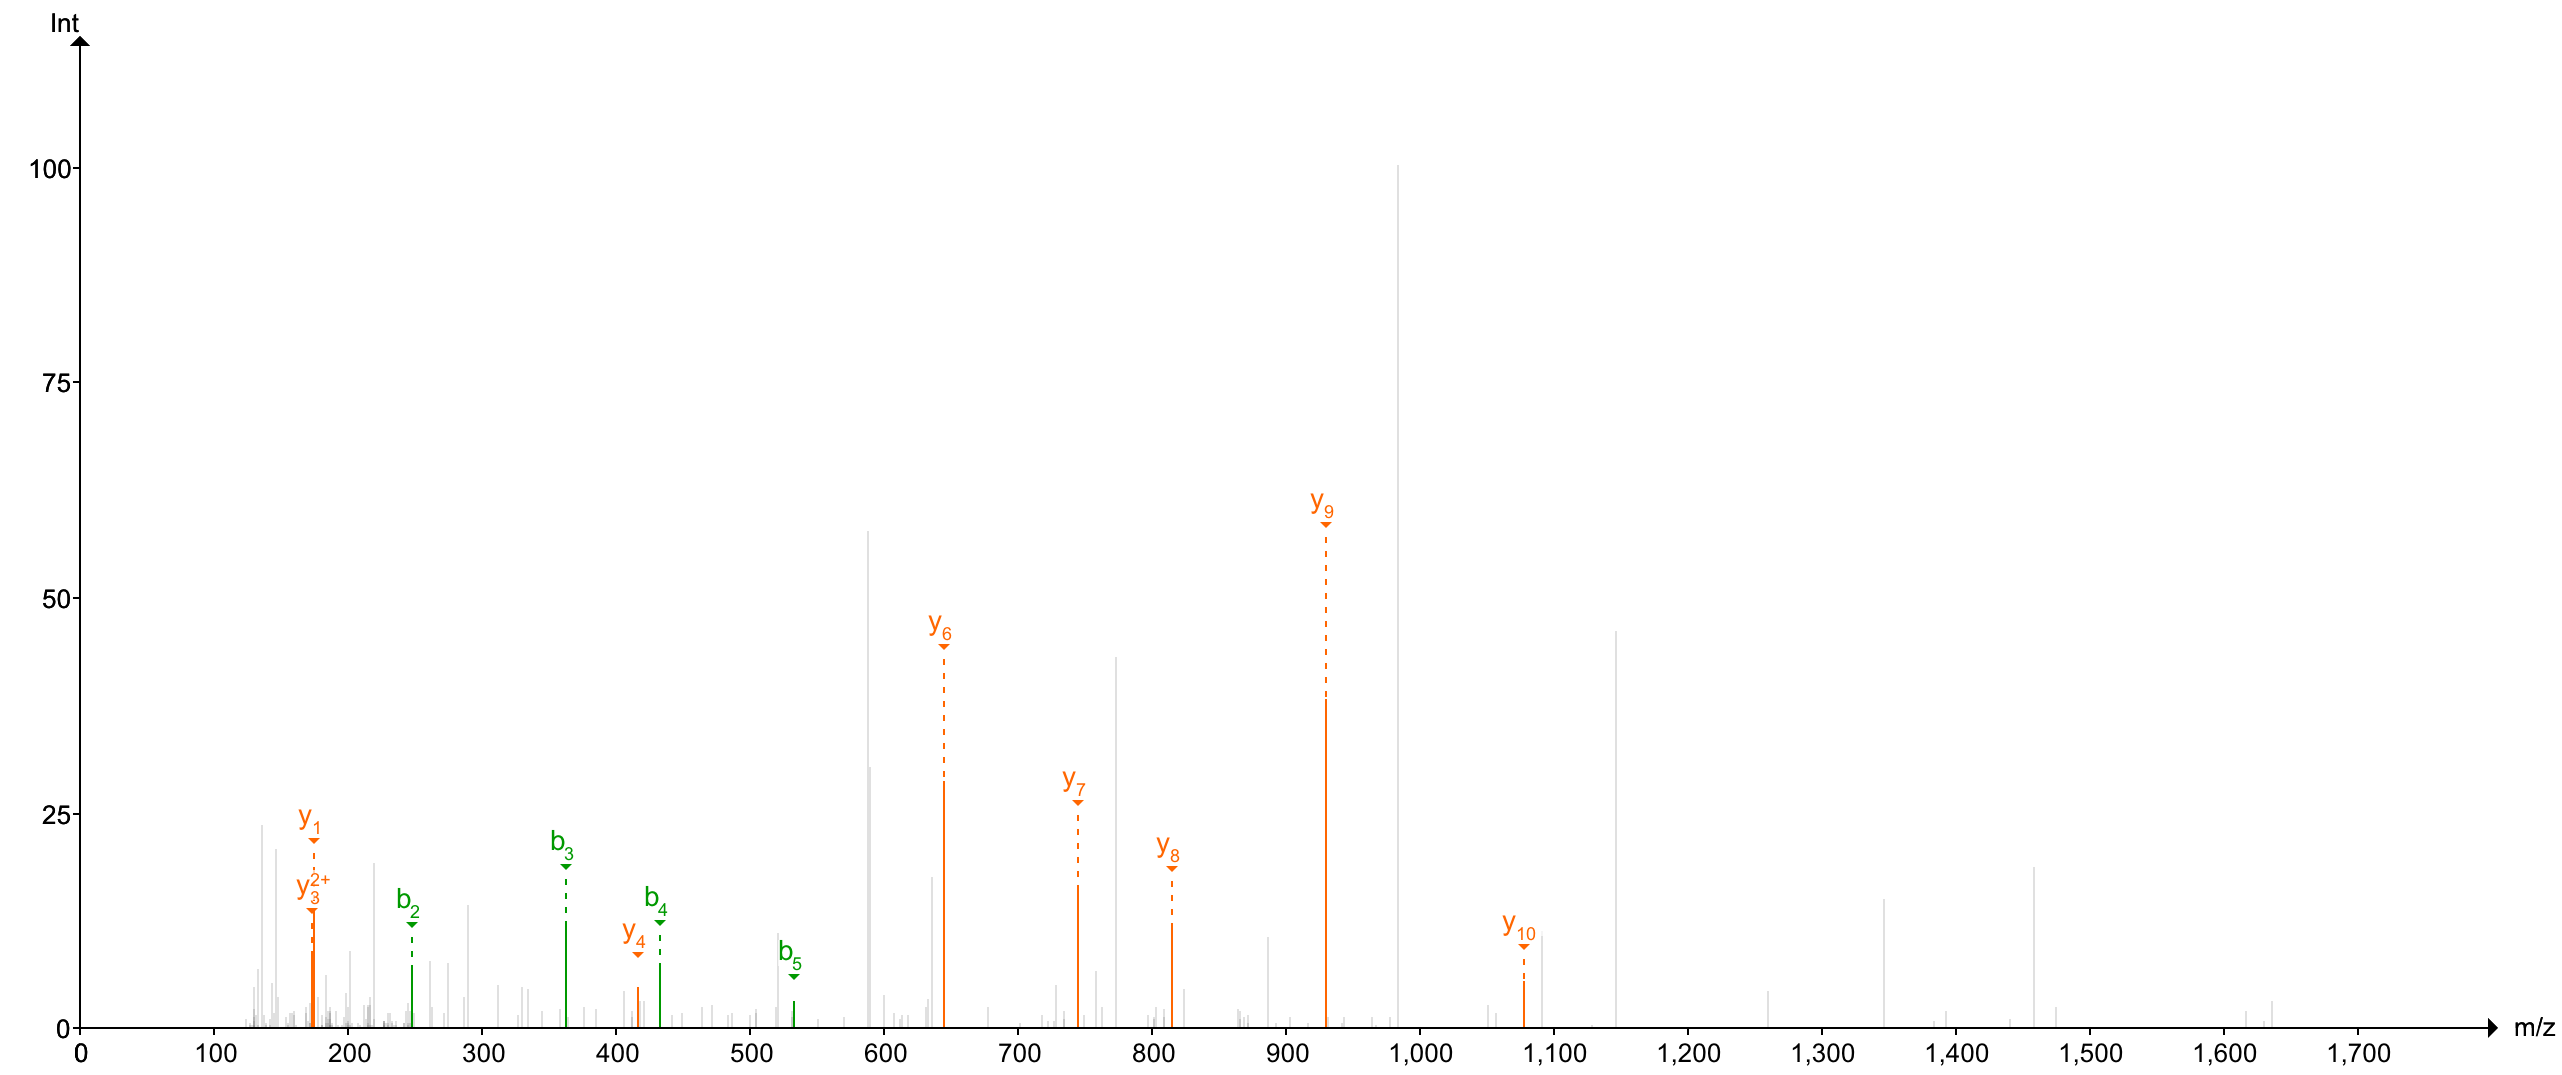

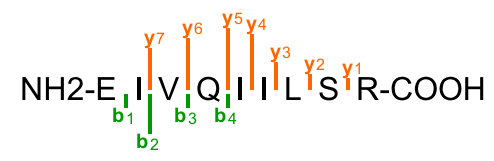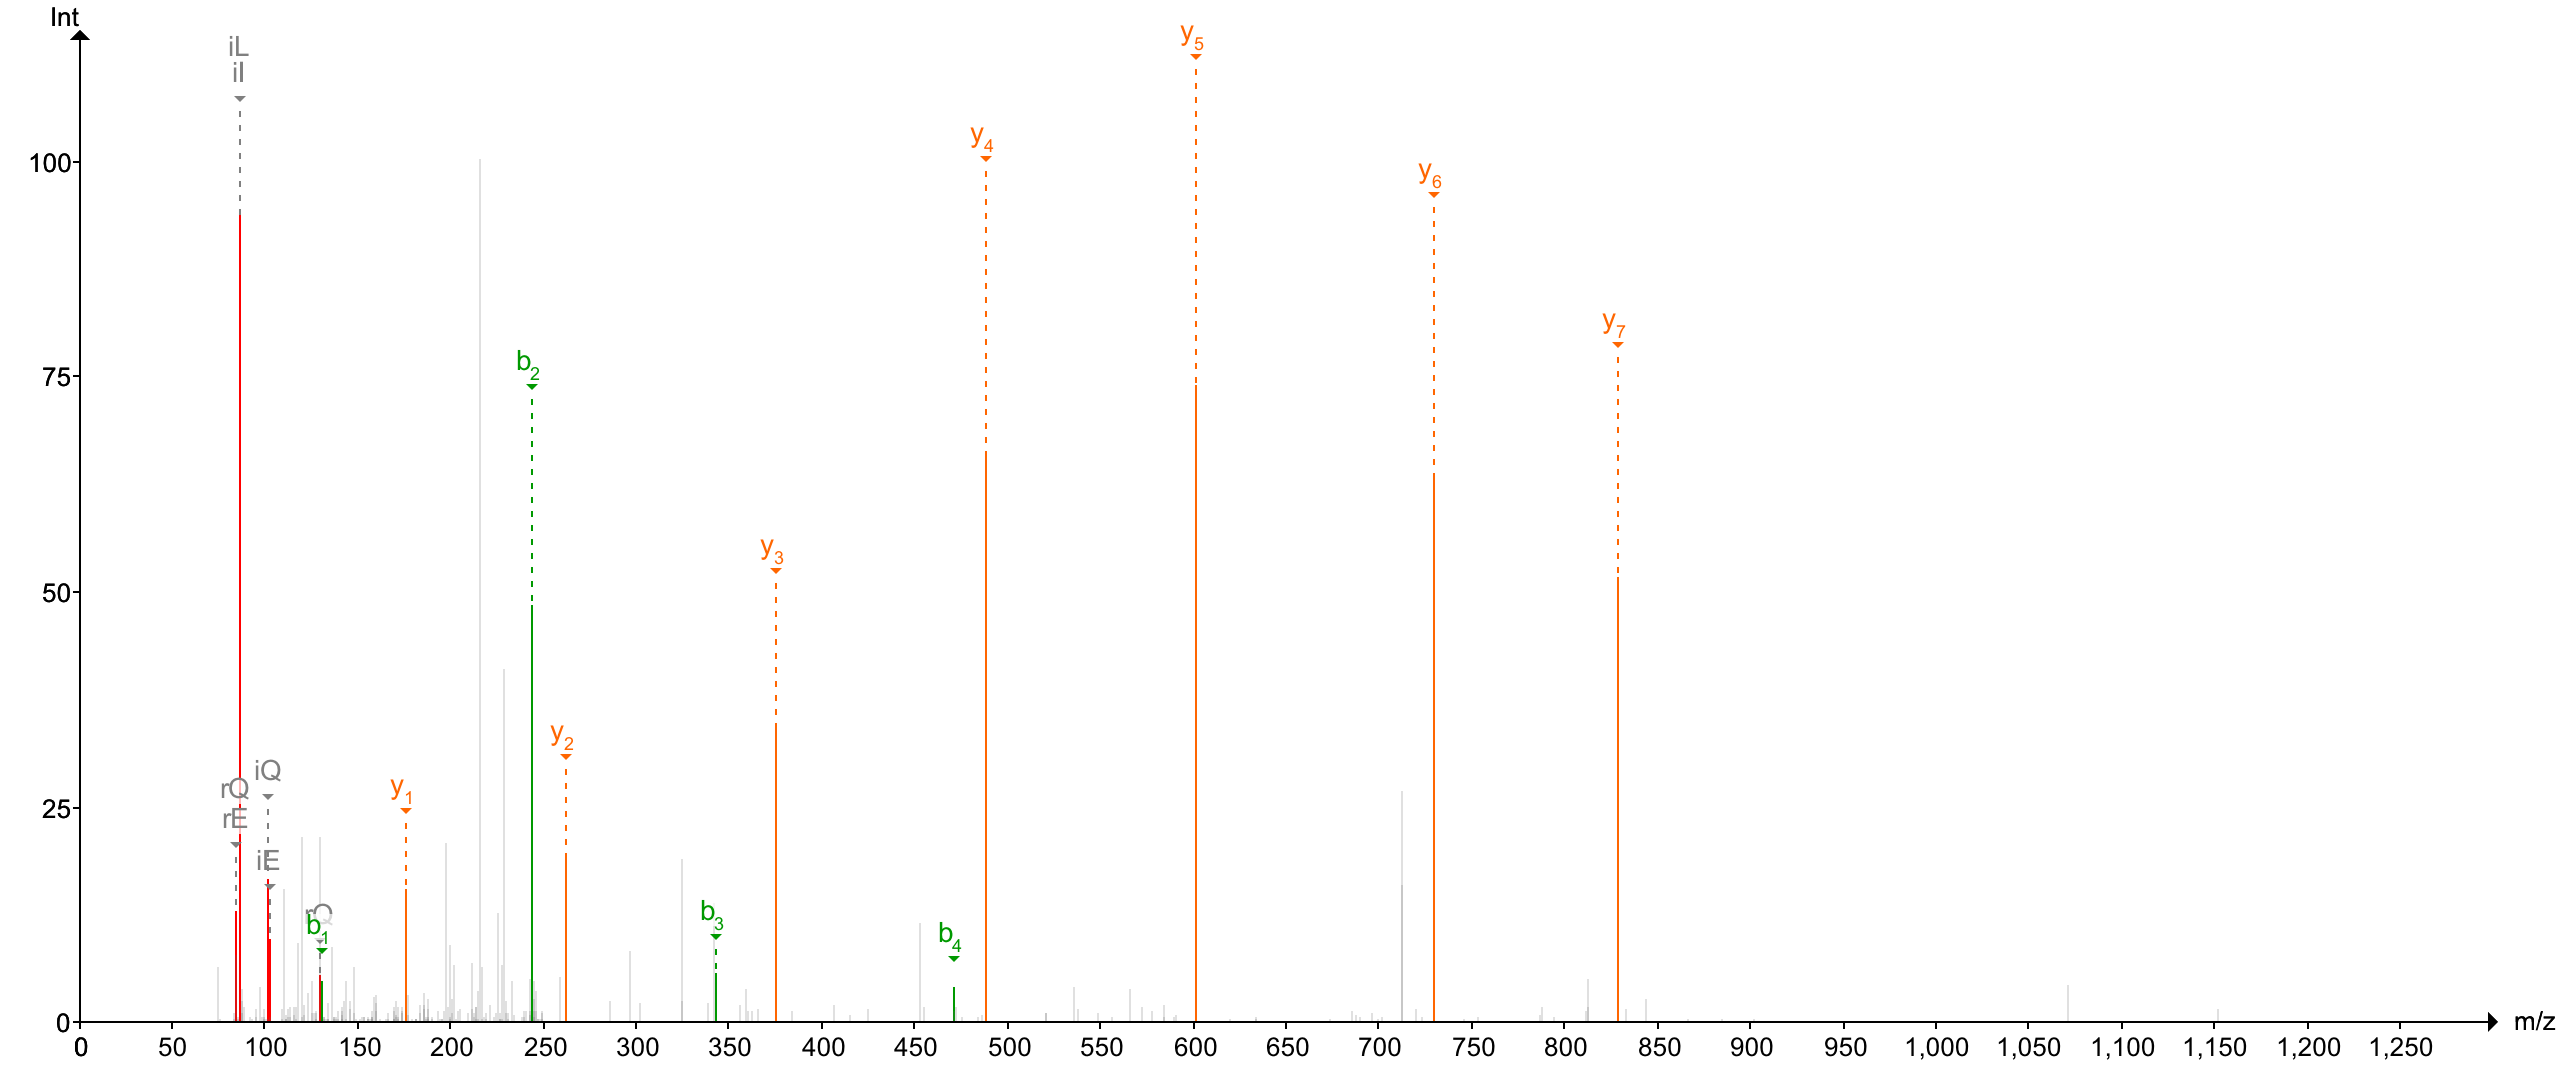

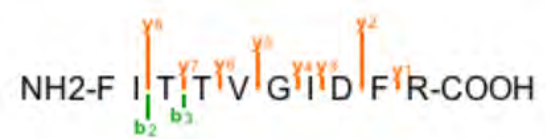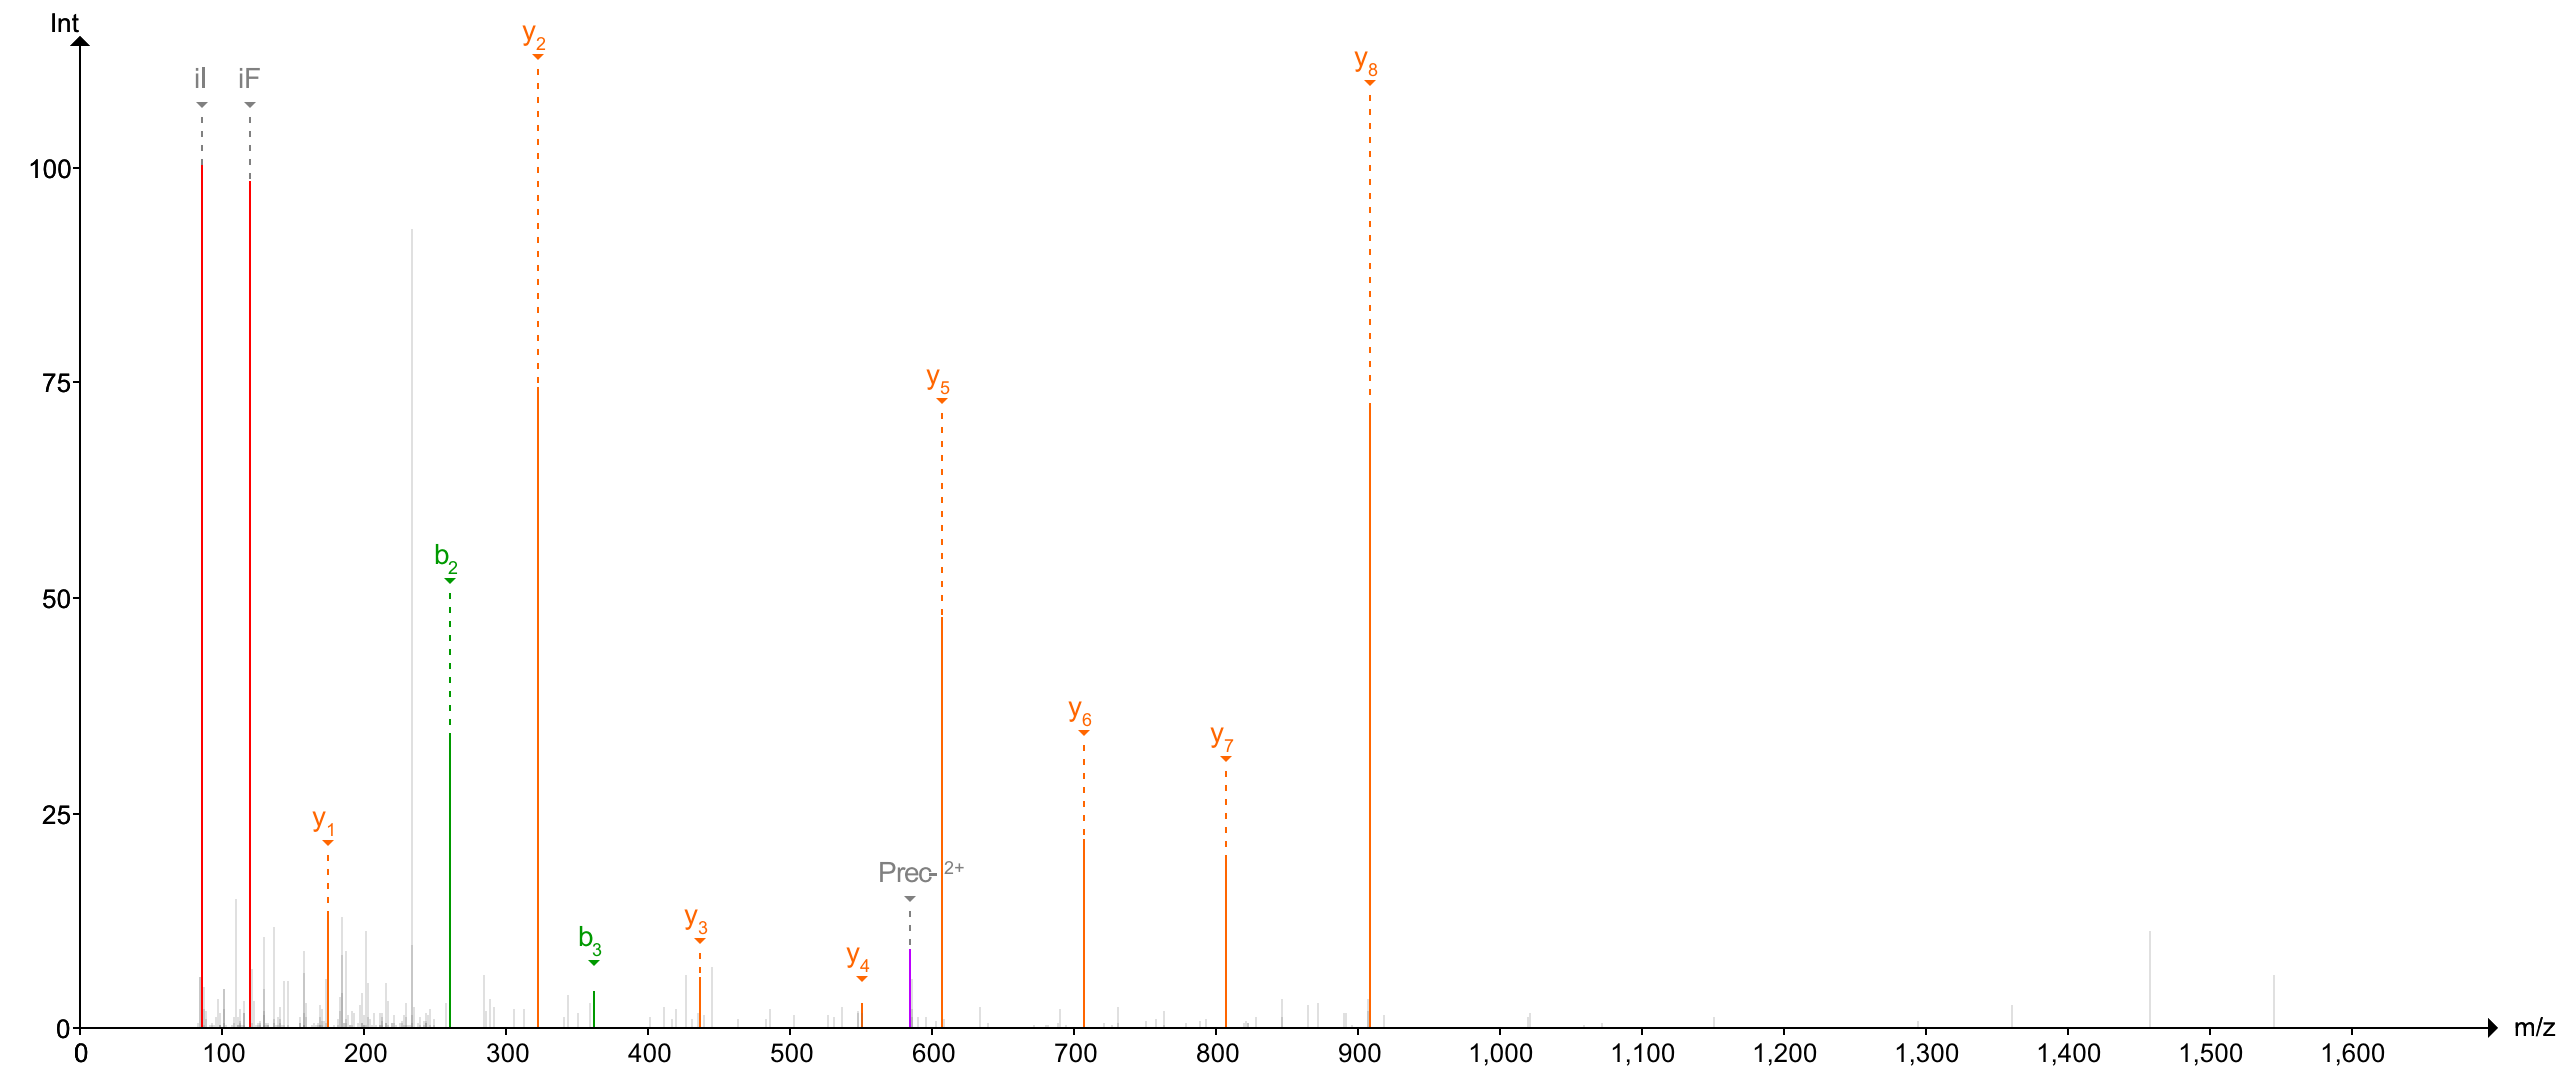

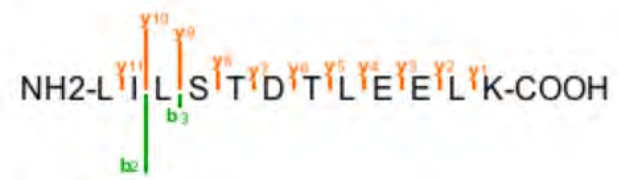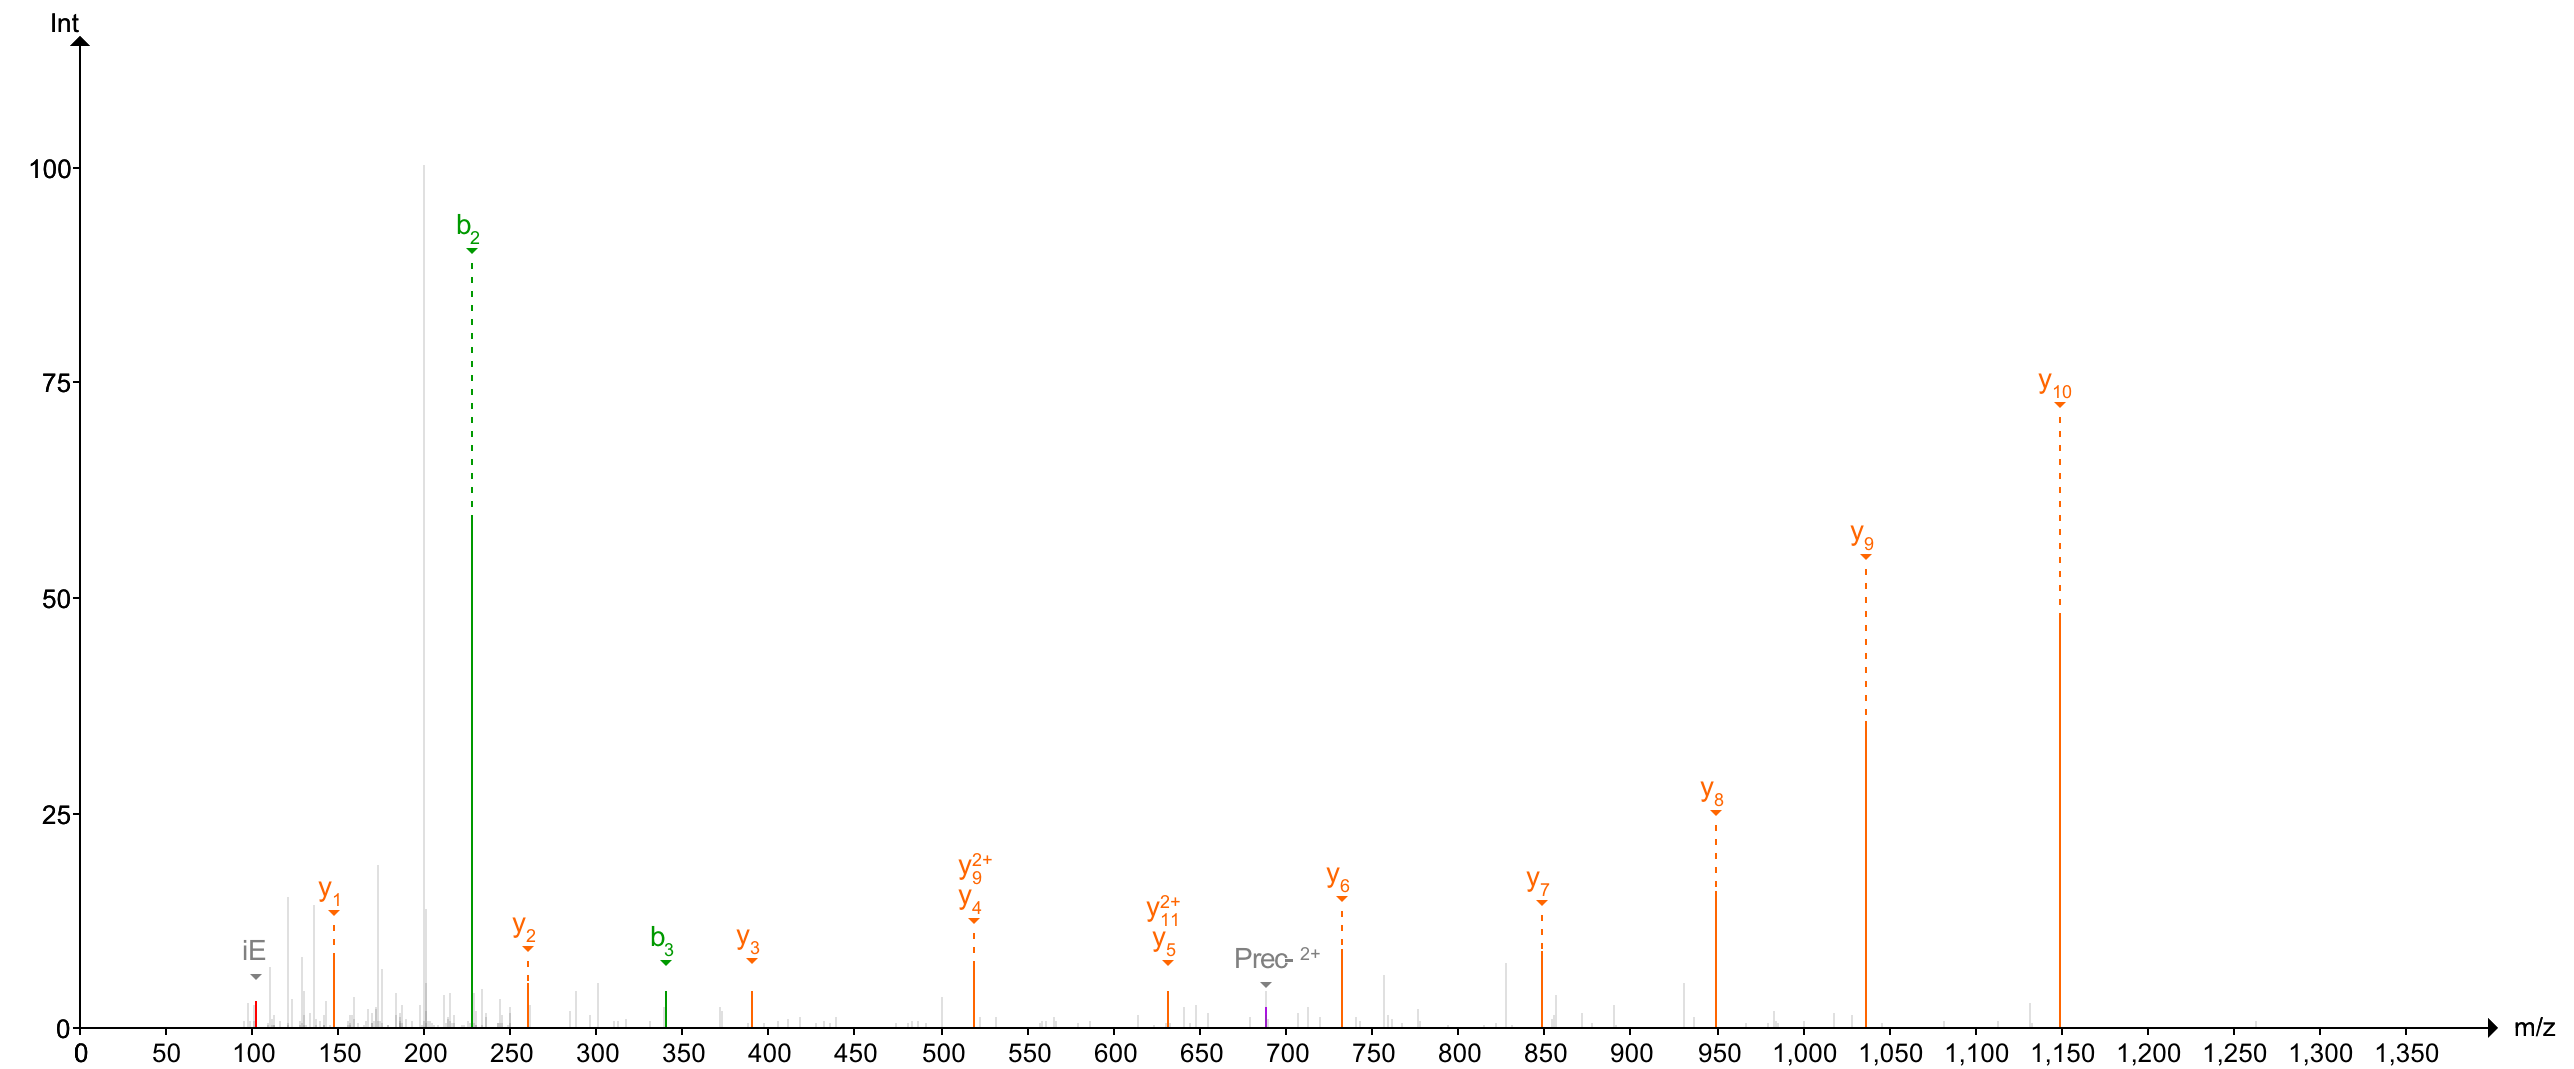

NH<sub>2</sub>-V I I E Y P T L H V V L K-COOH

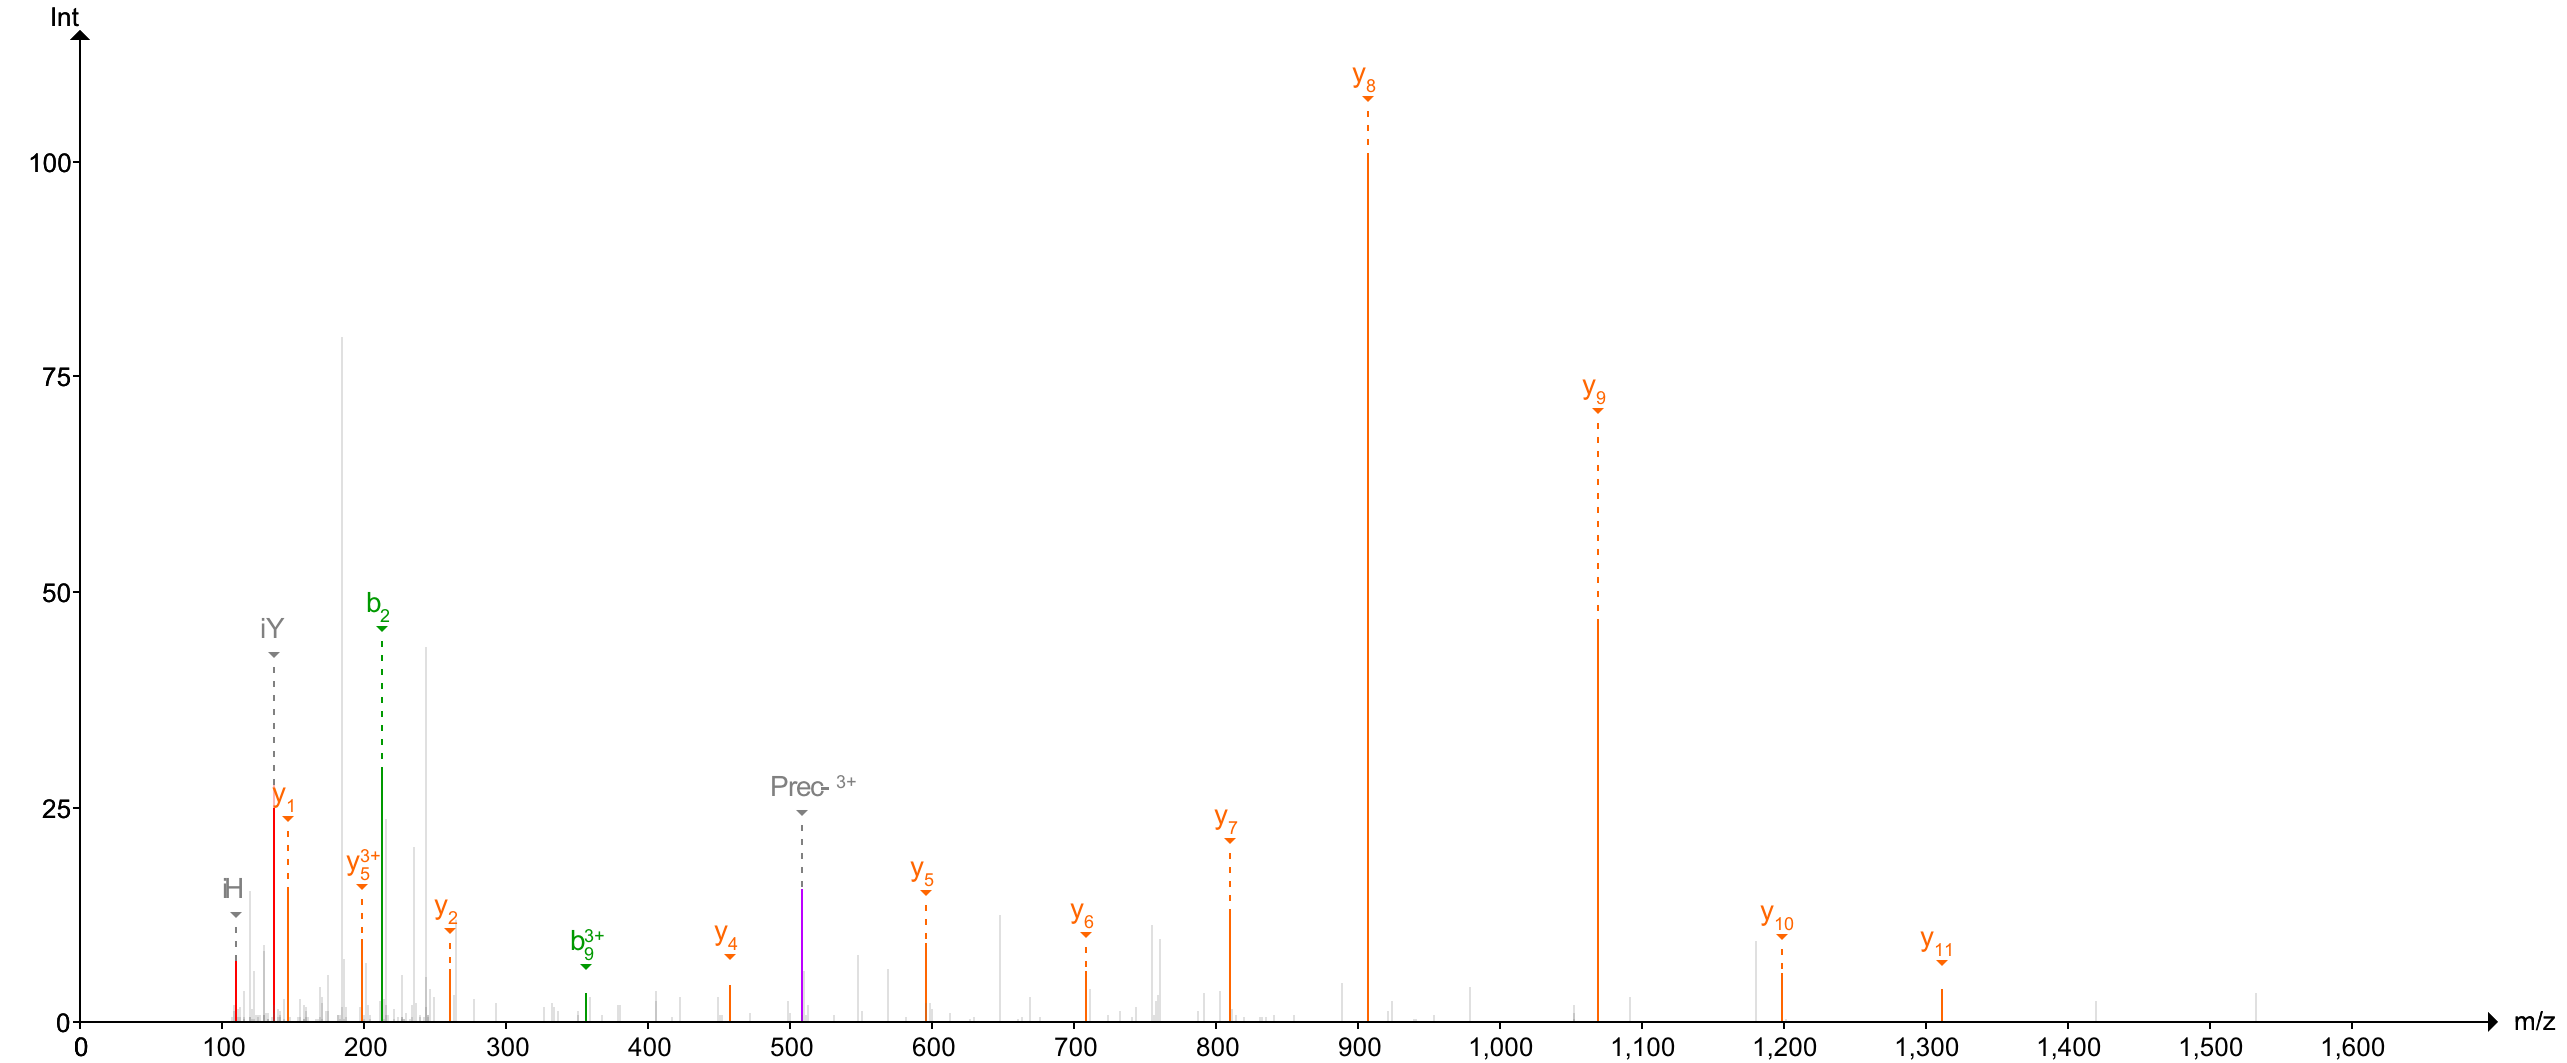



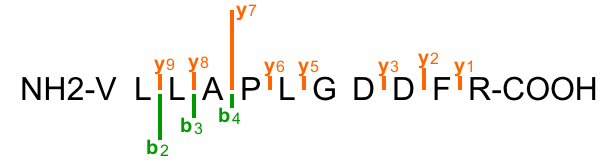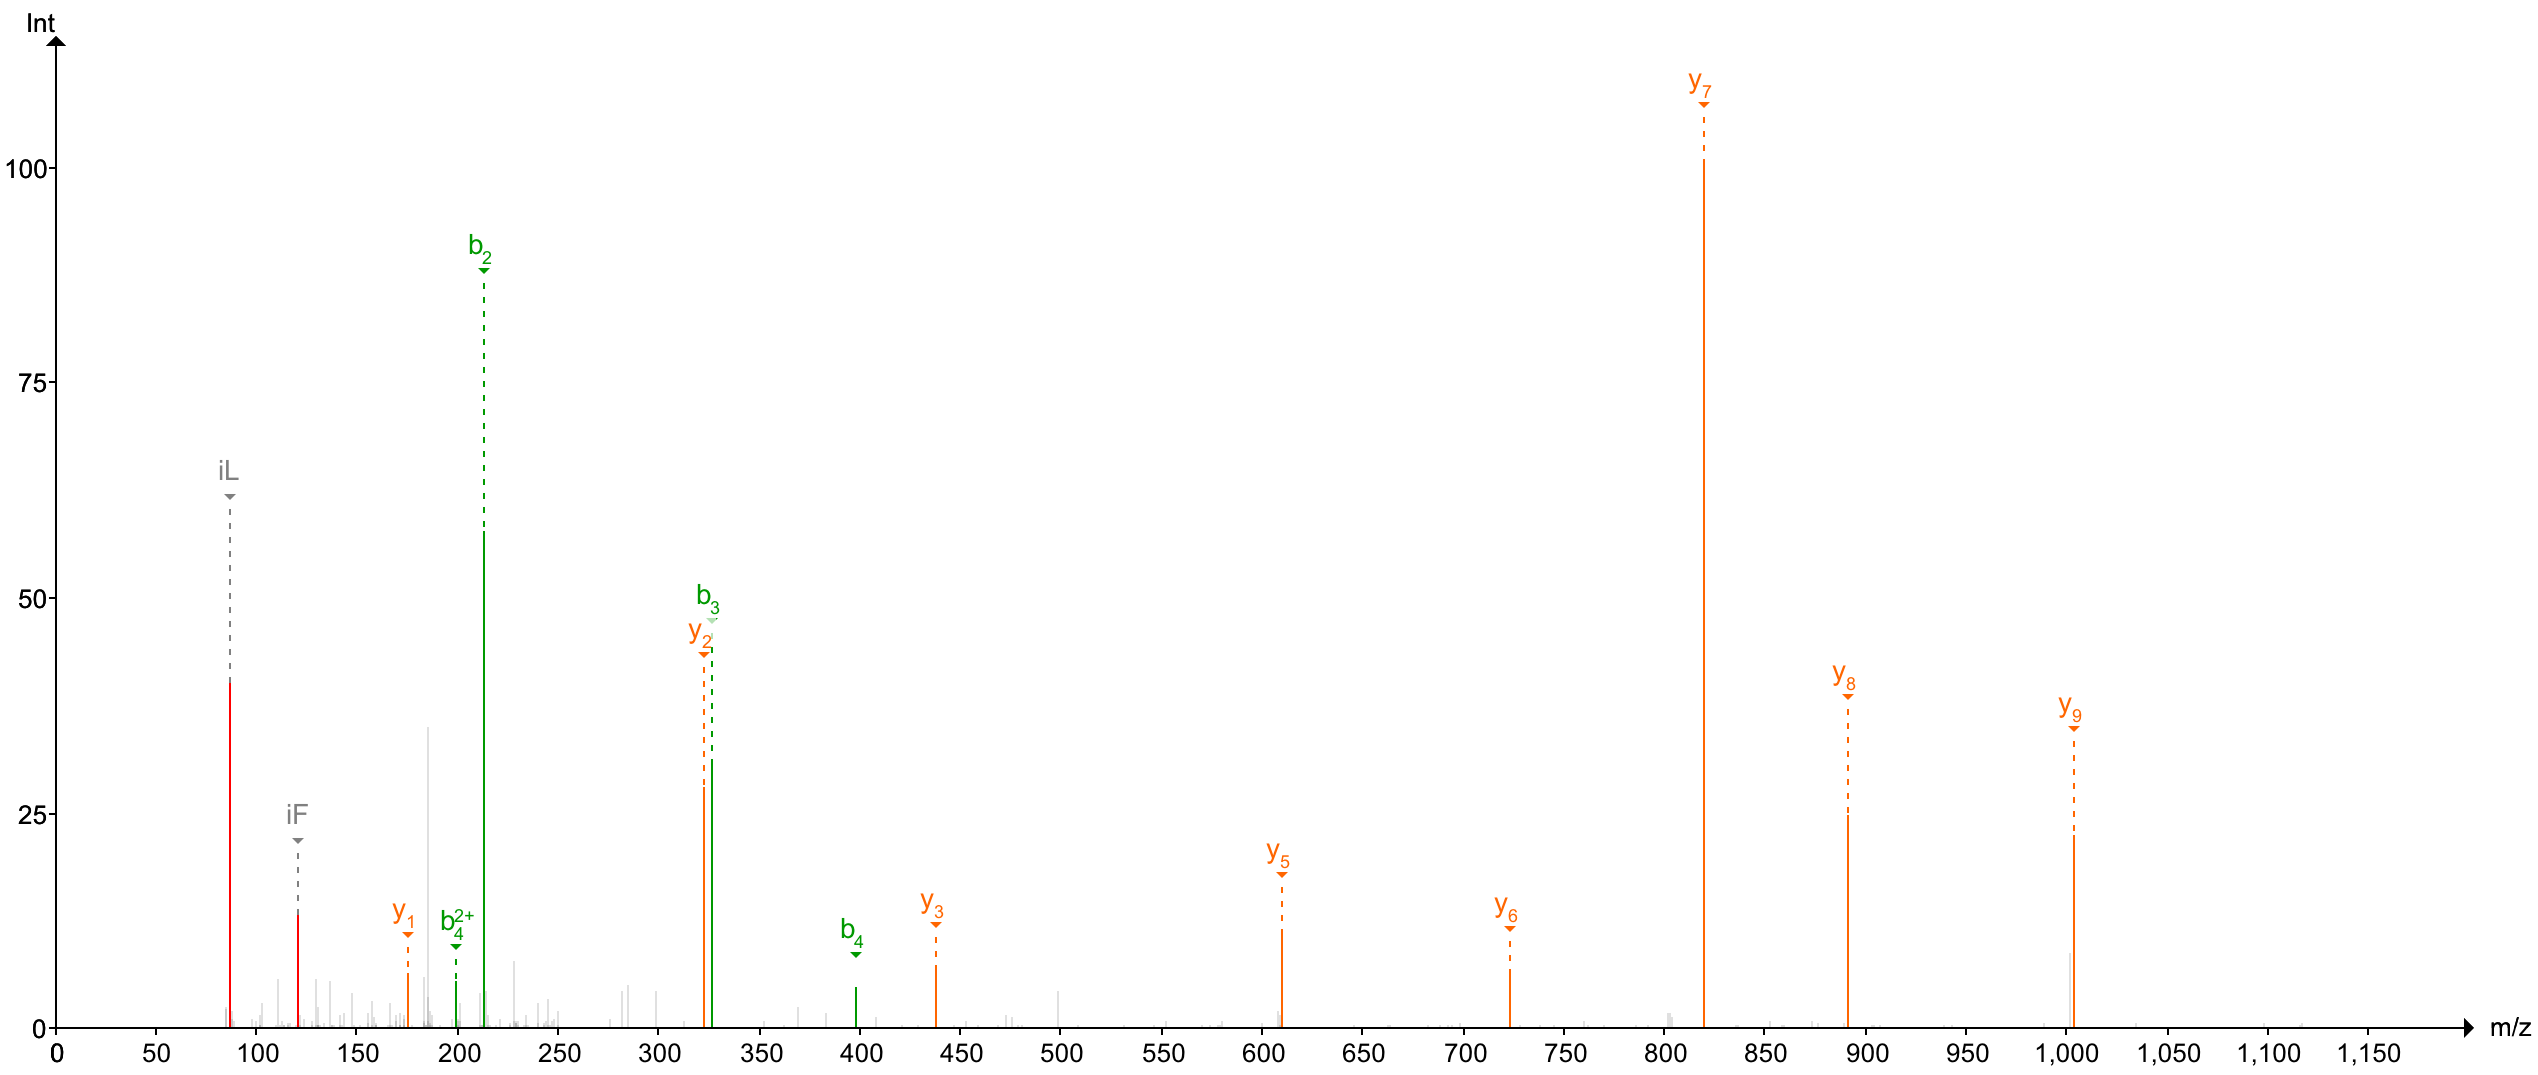

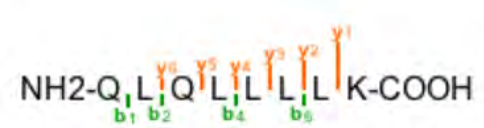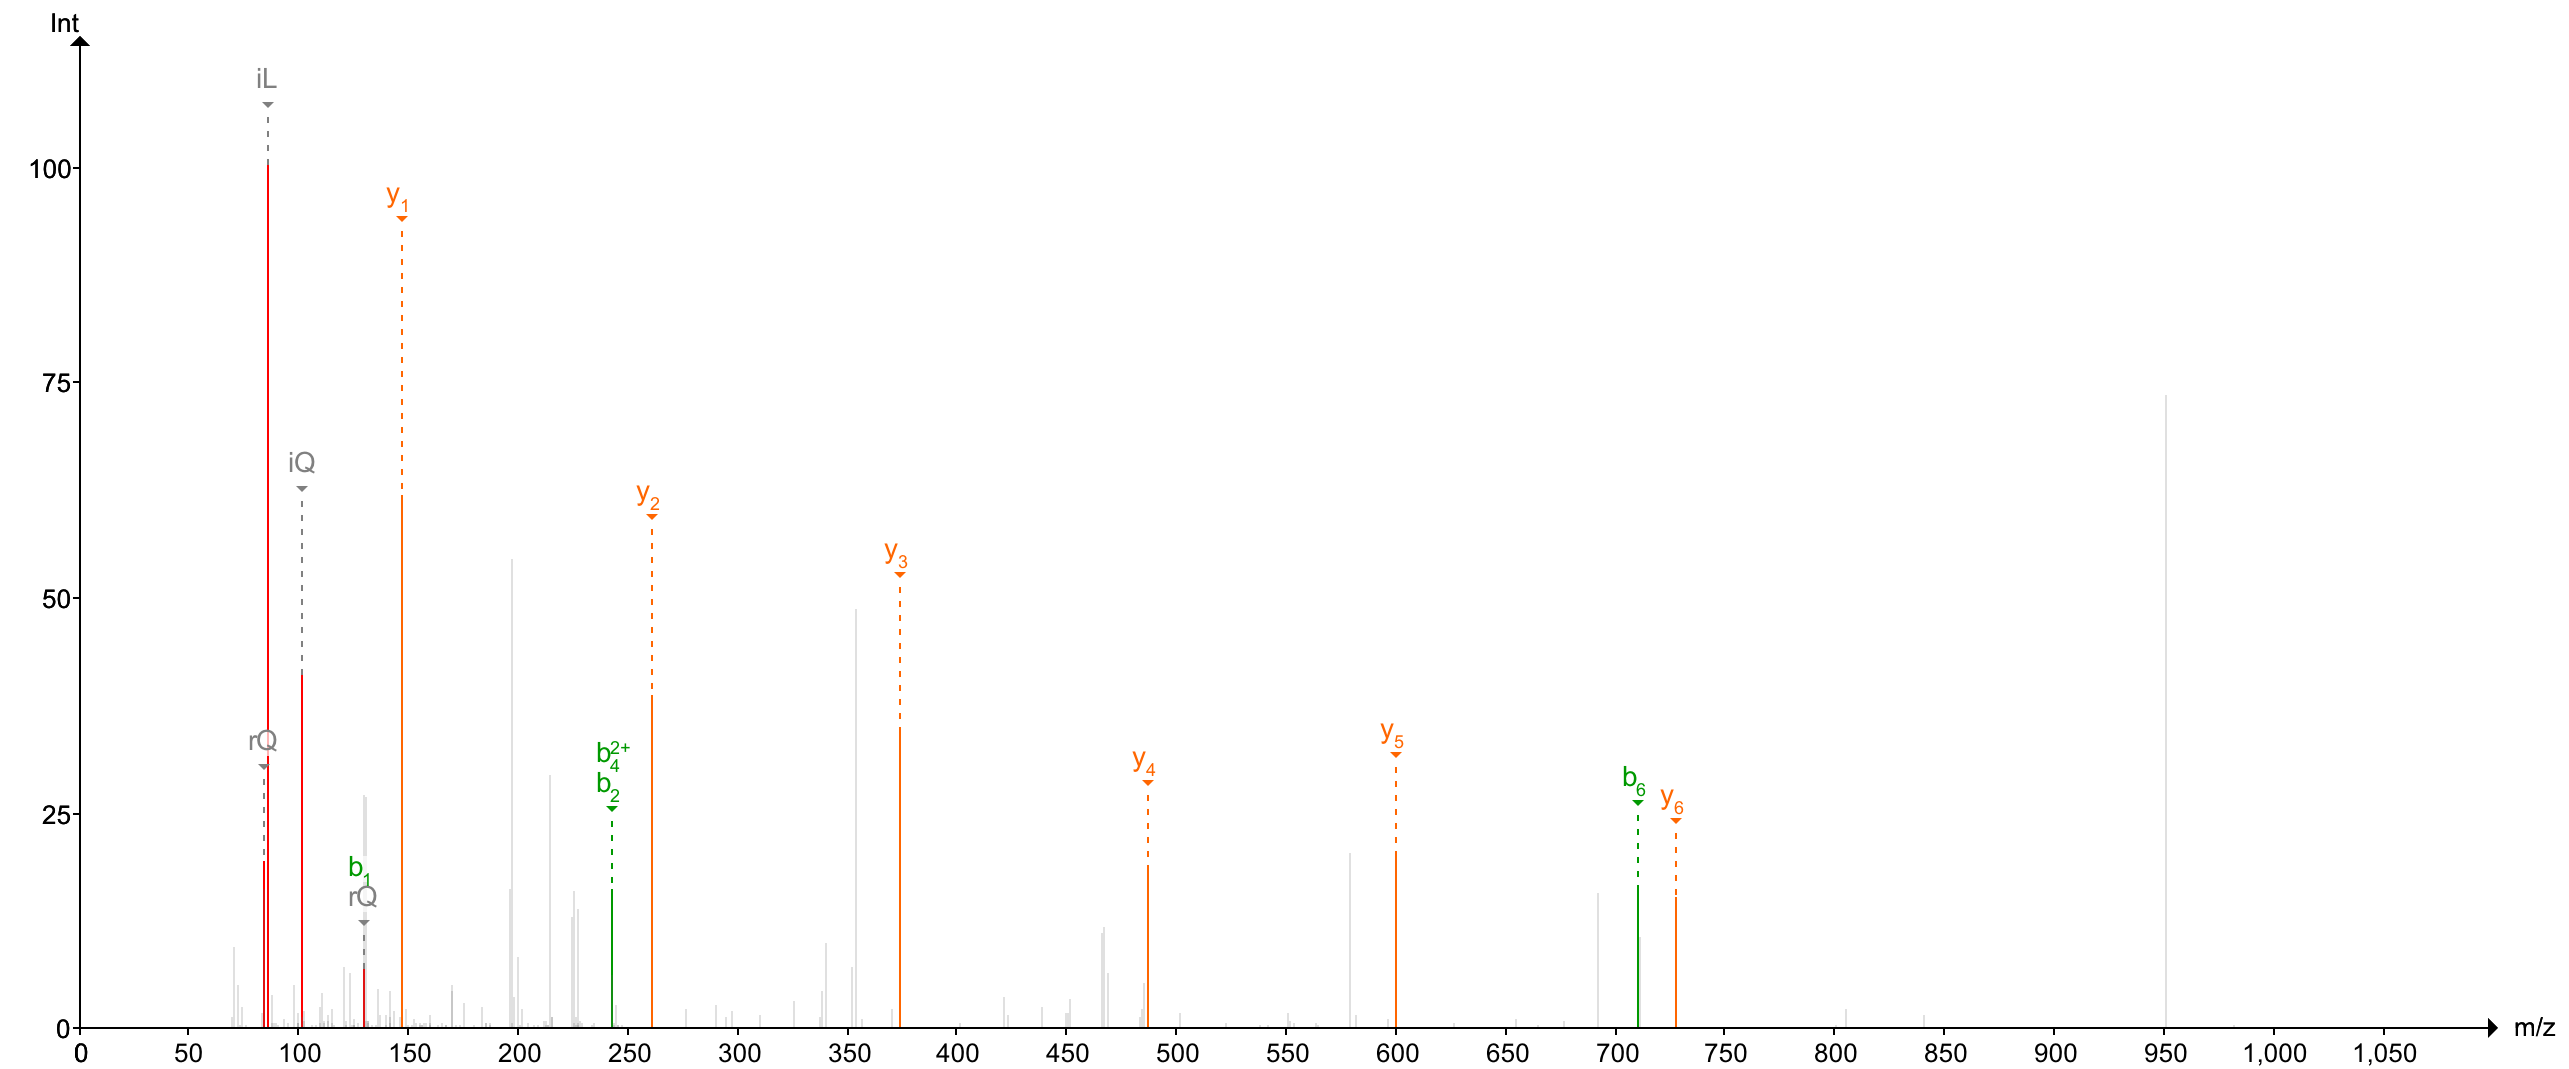

NH<sub>2</sub>-F<sup>y<sub>8</sub></sup>Q<sup>y<sub>7</sub></sup>V<sup>y<sub>6</sub></sup>L<sup>y<sub>5</sub></sup>L<sup>y<sub>4</sub></sup>A<sup>y<sub>3</sub></sup>E<sup>y<sub>2</sub></sup>L<sup>y<sub>1</sub></sup>K-COOH  
b<sub>2</sub> b<sub>3</sub>

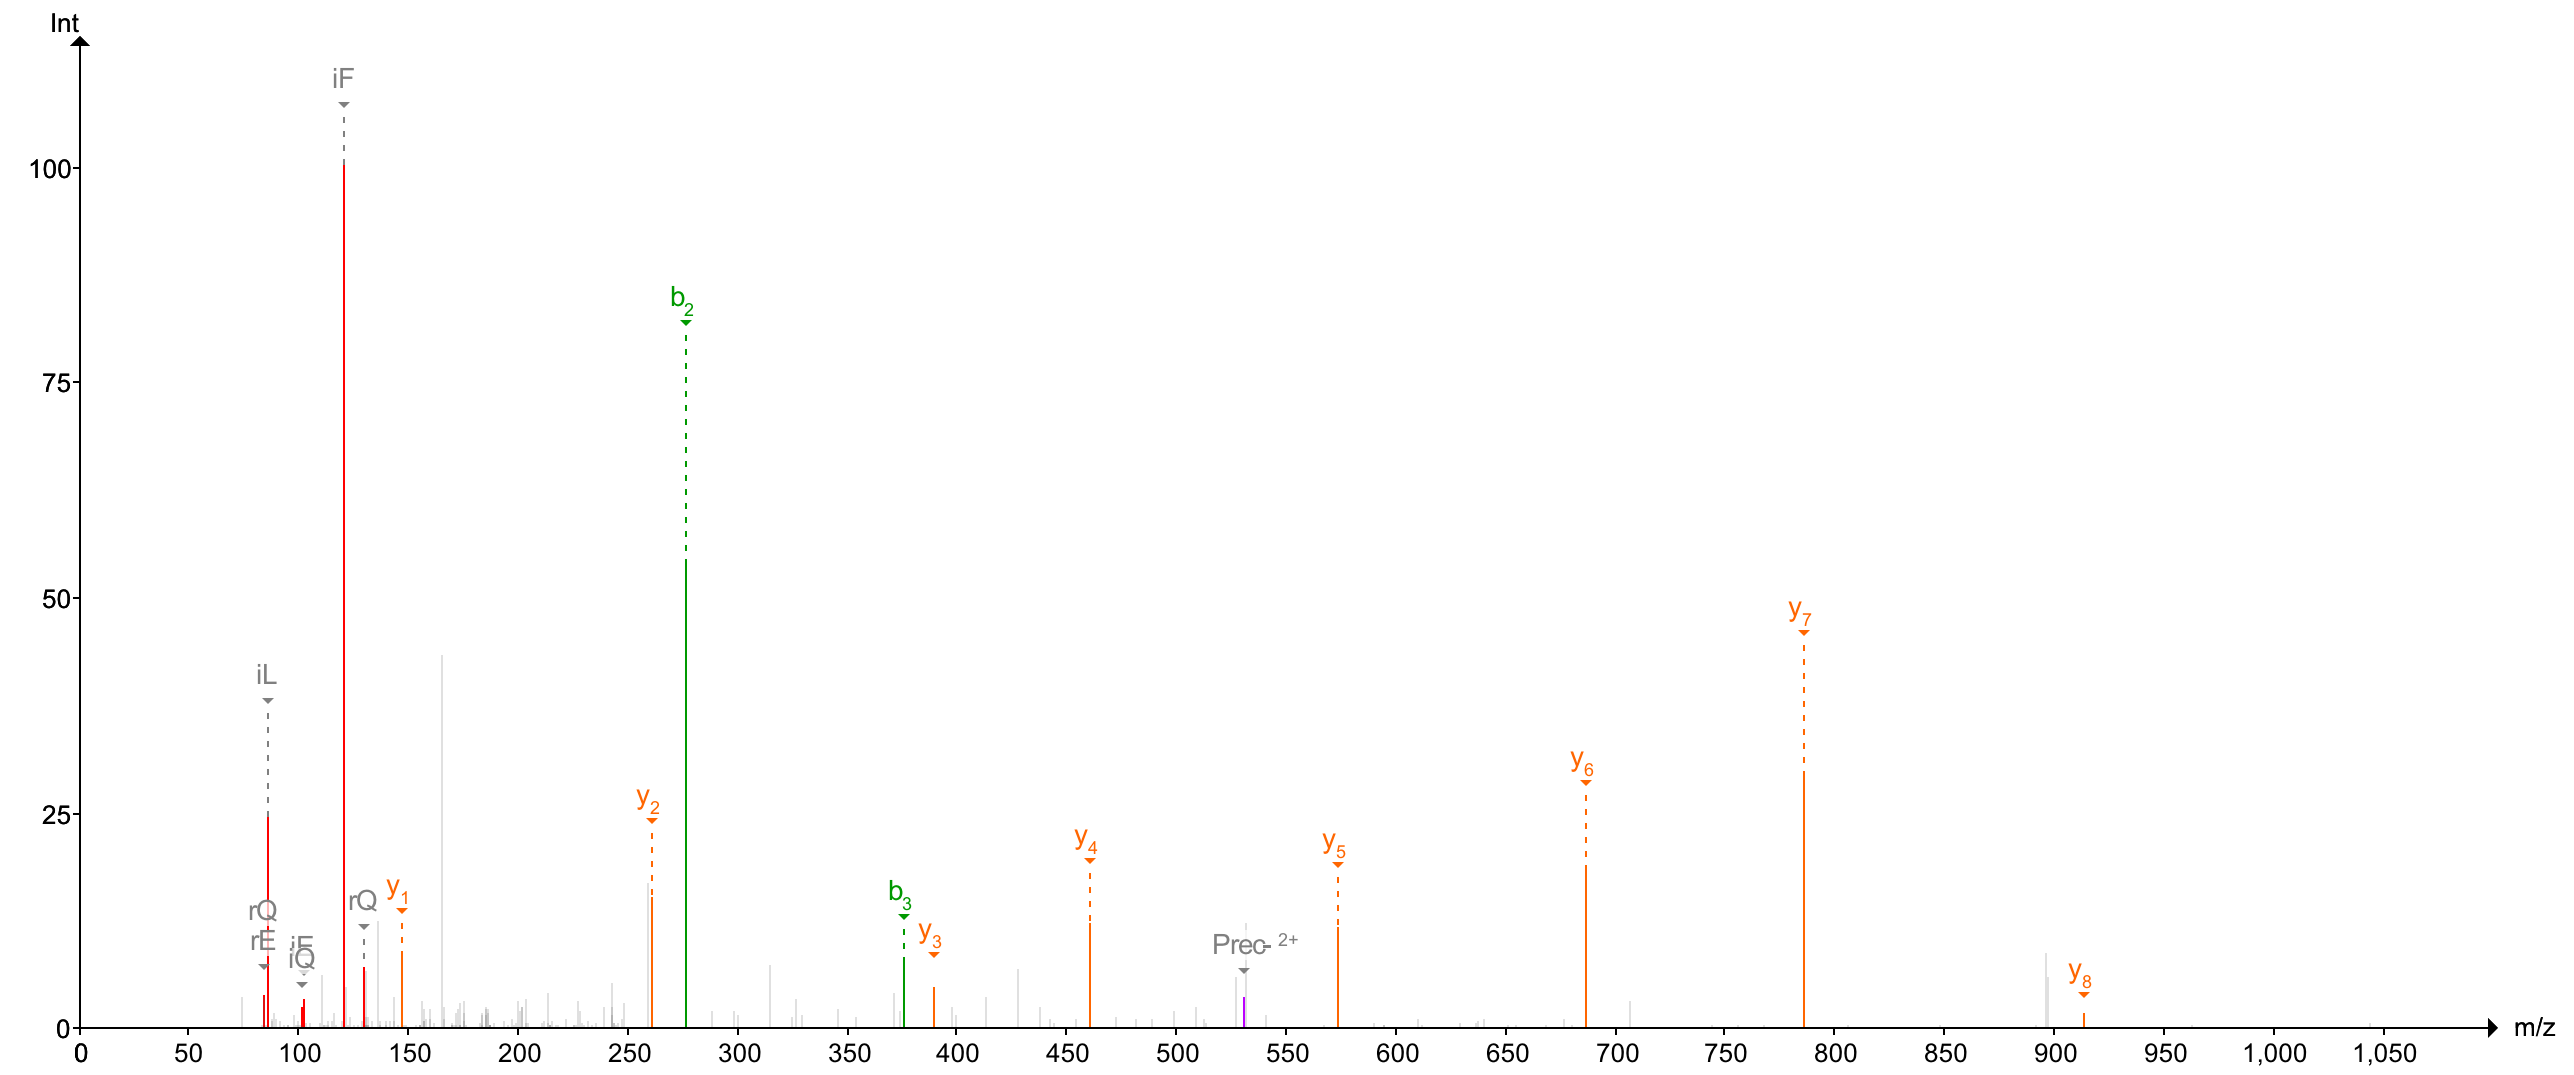

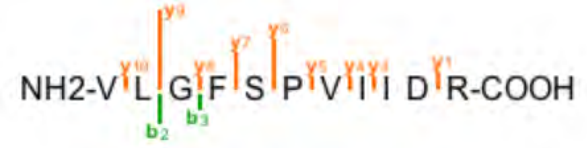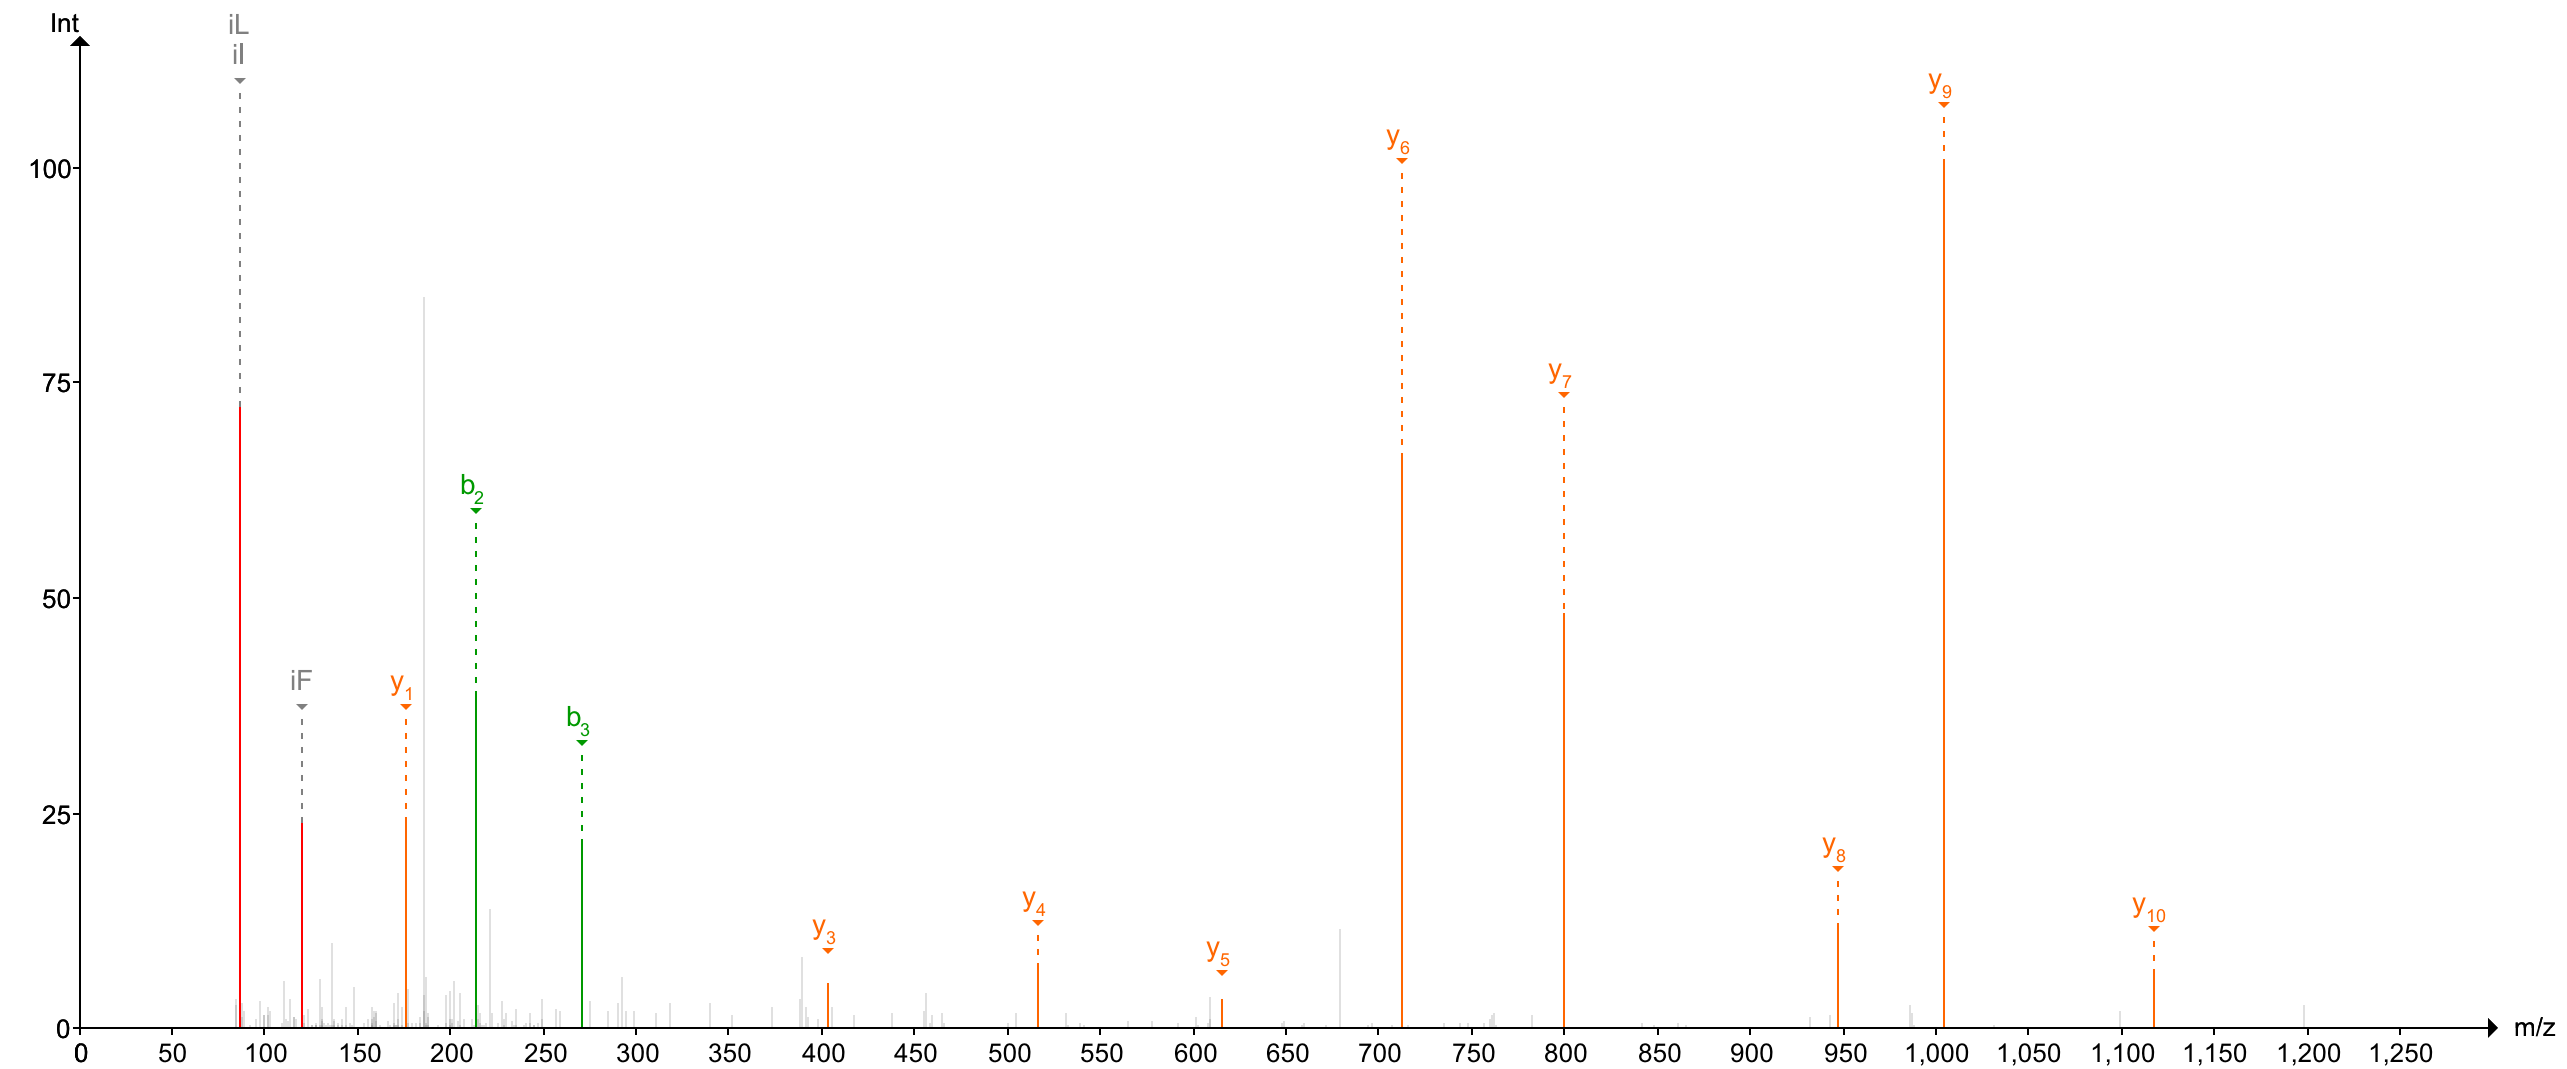

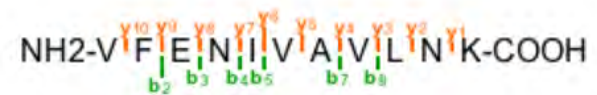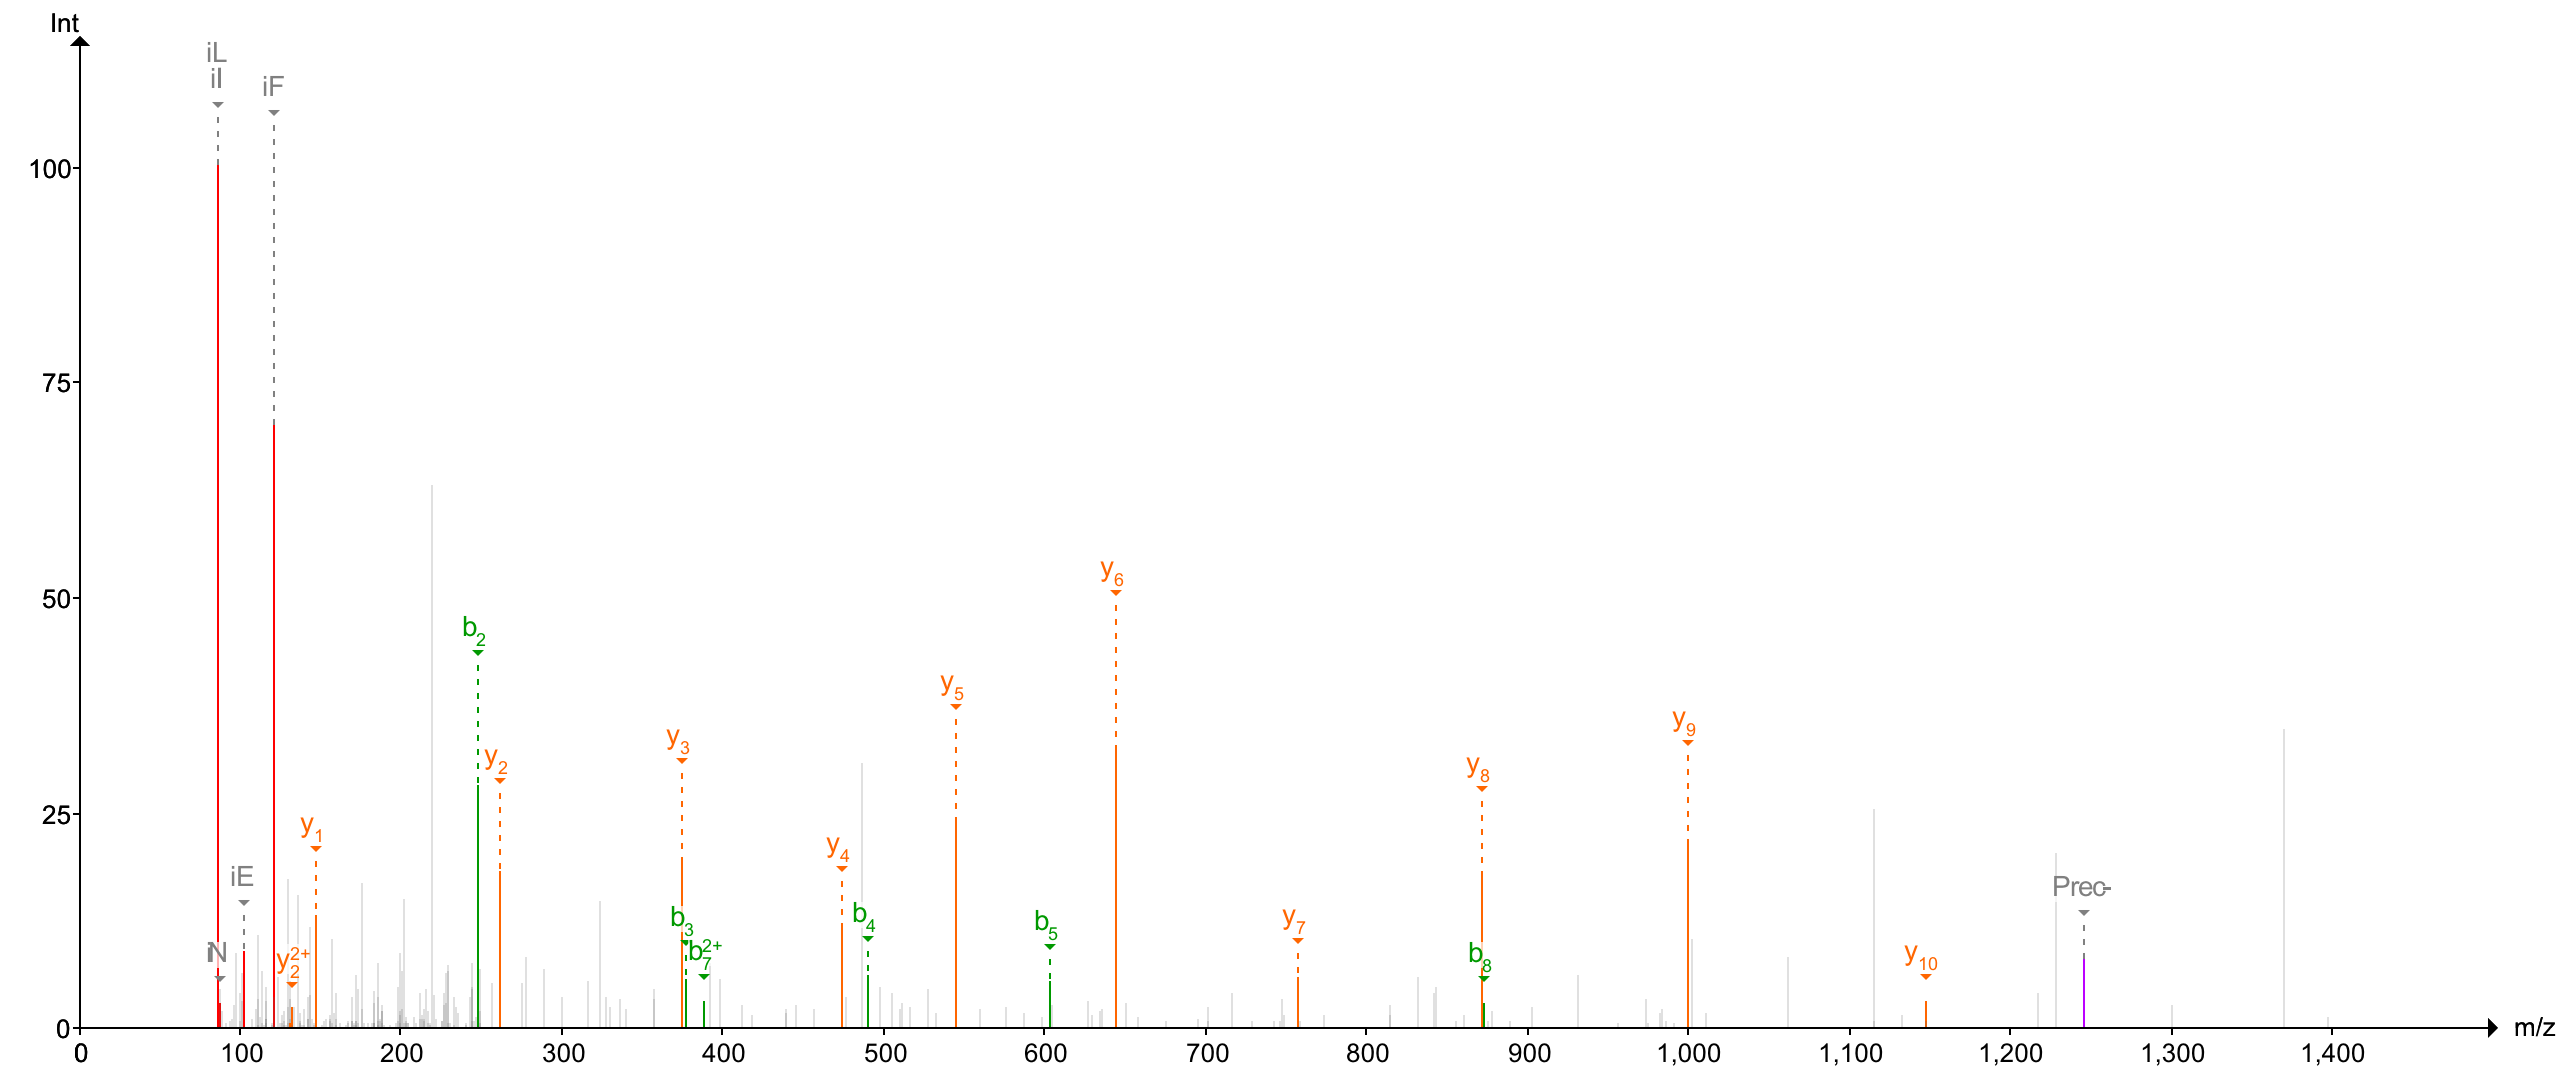

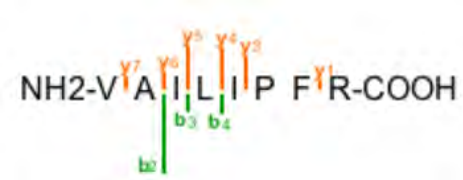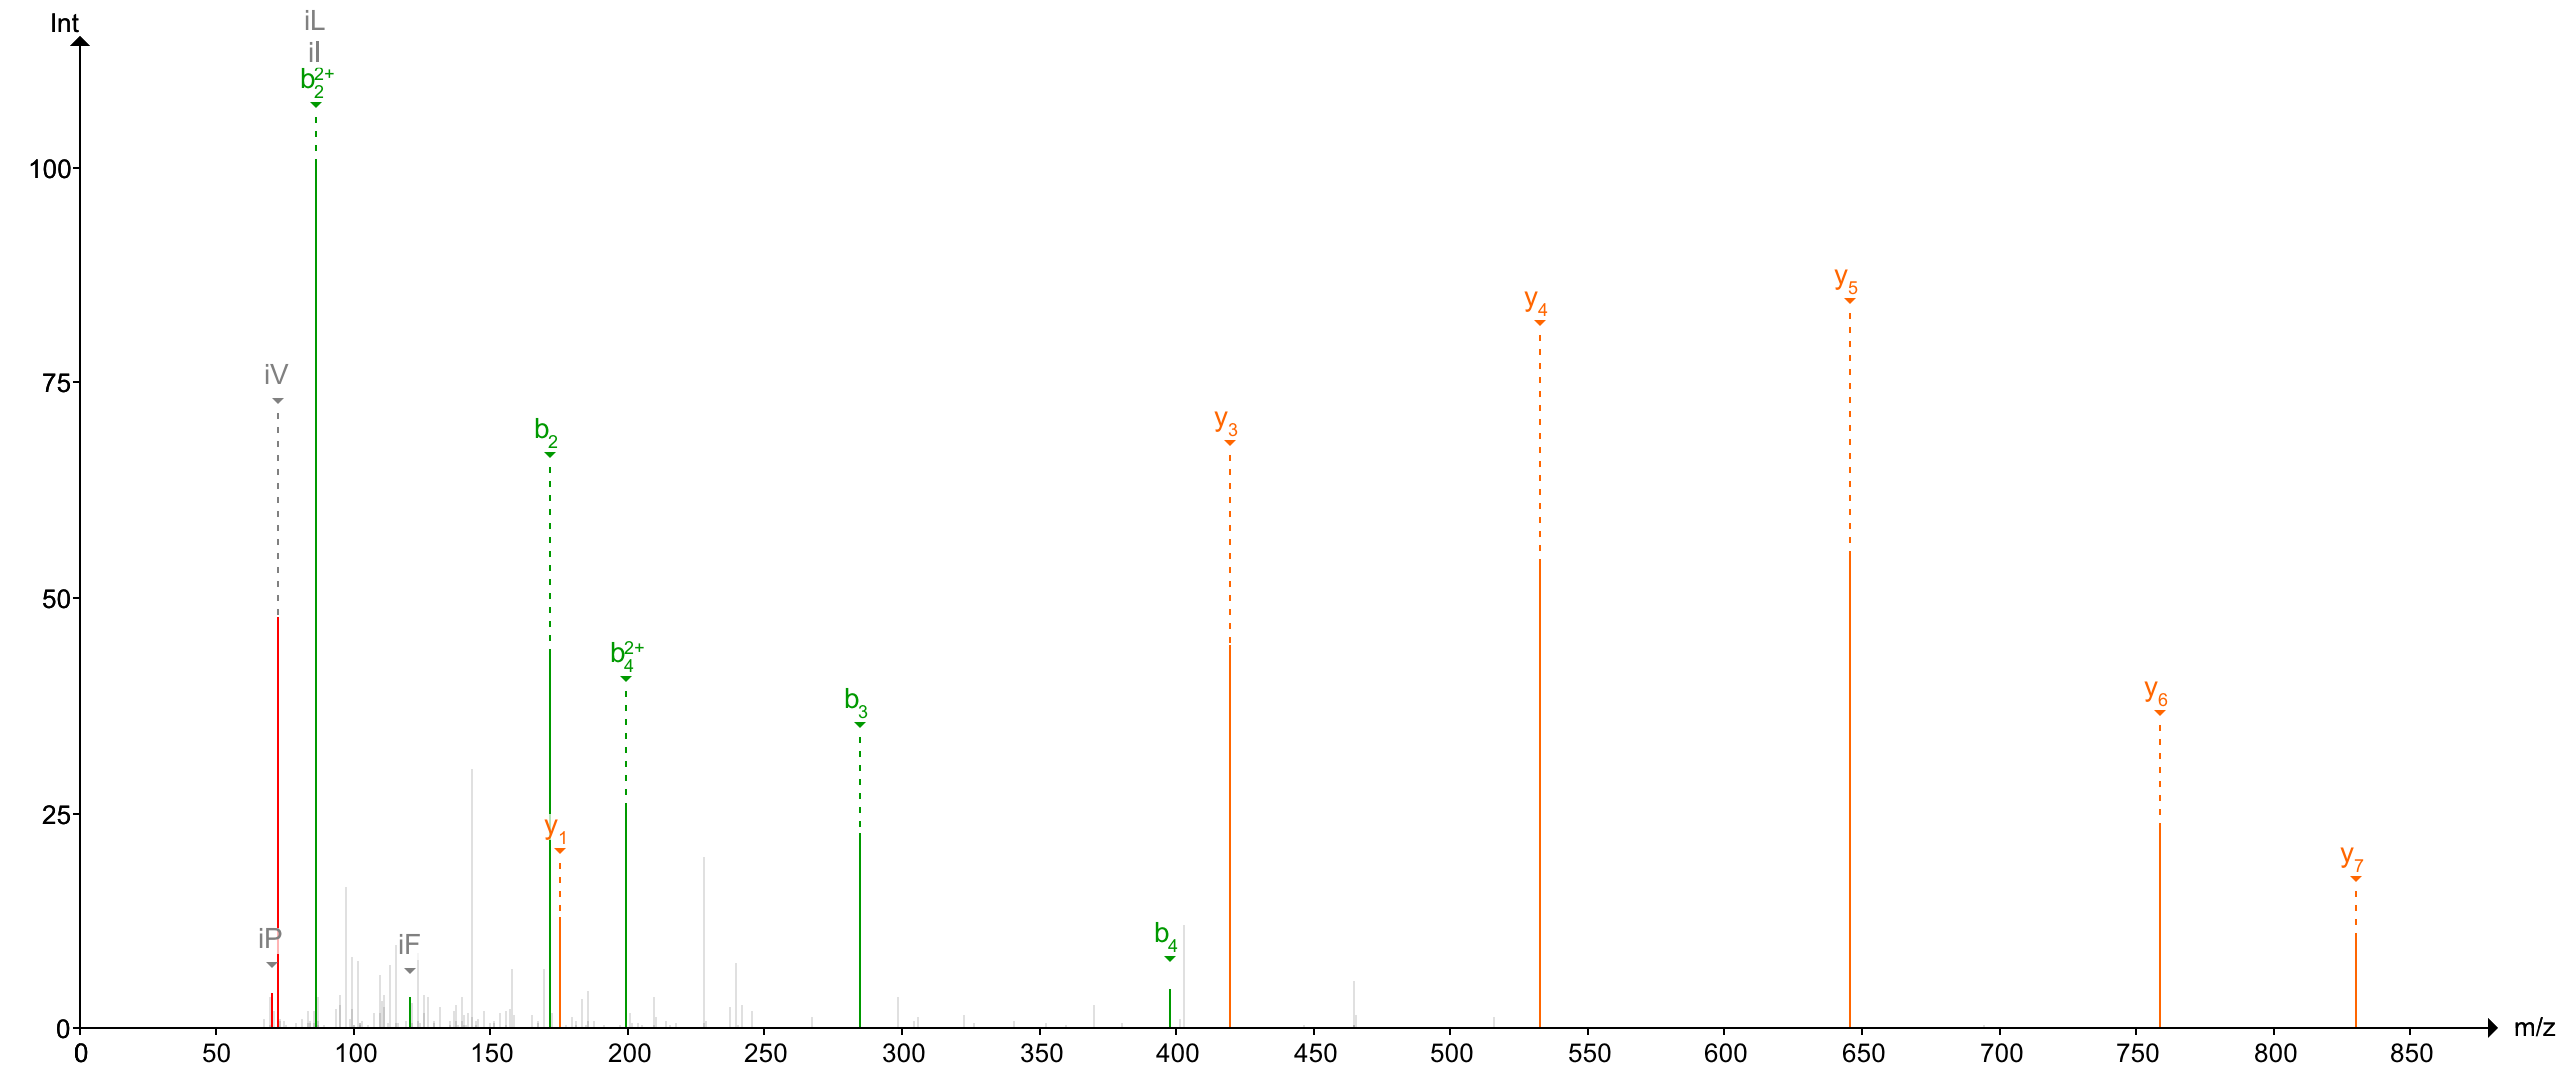

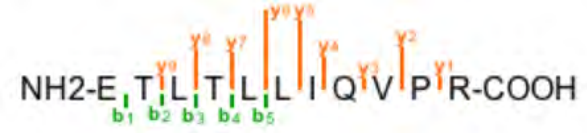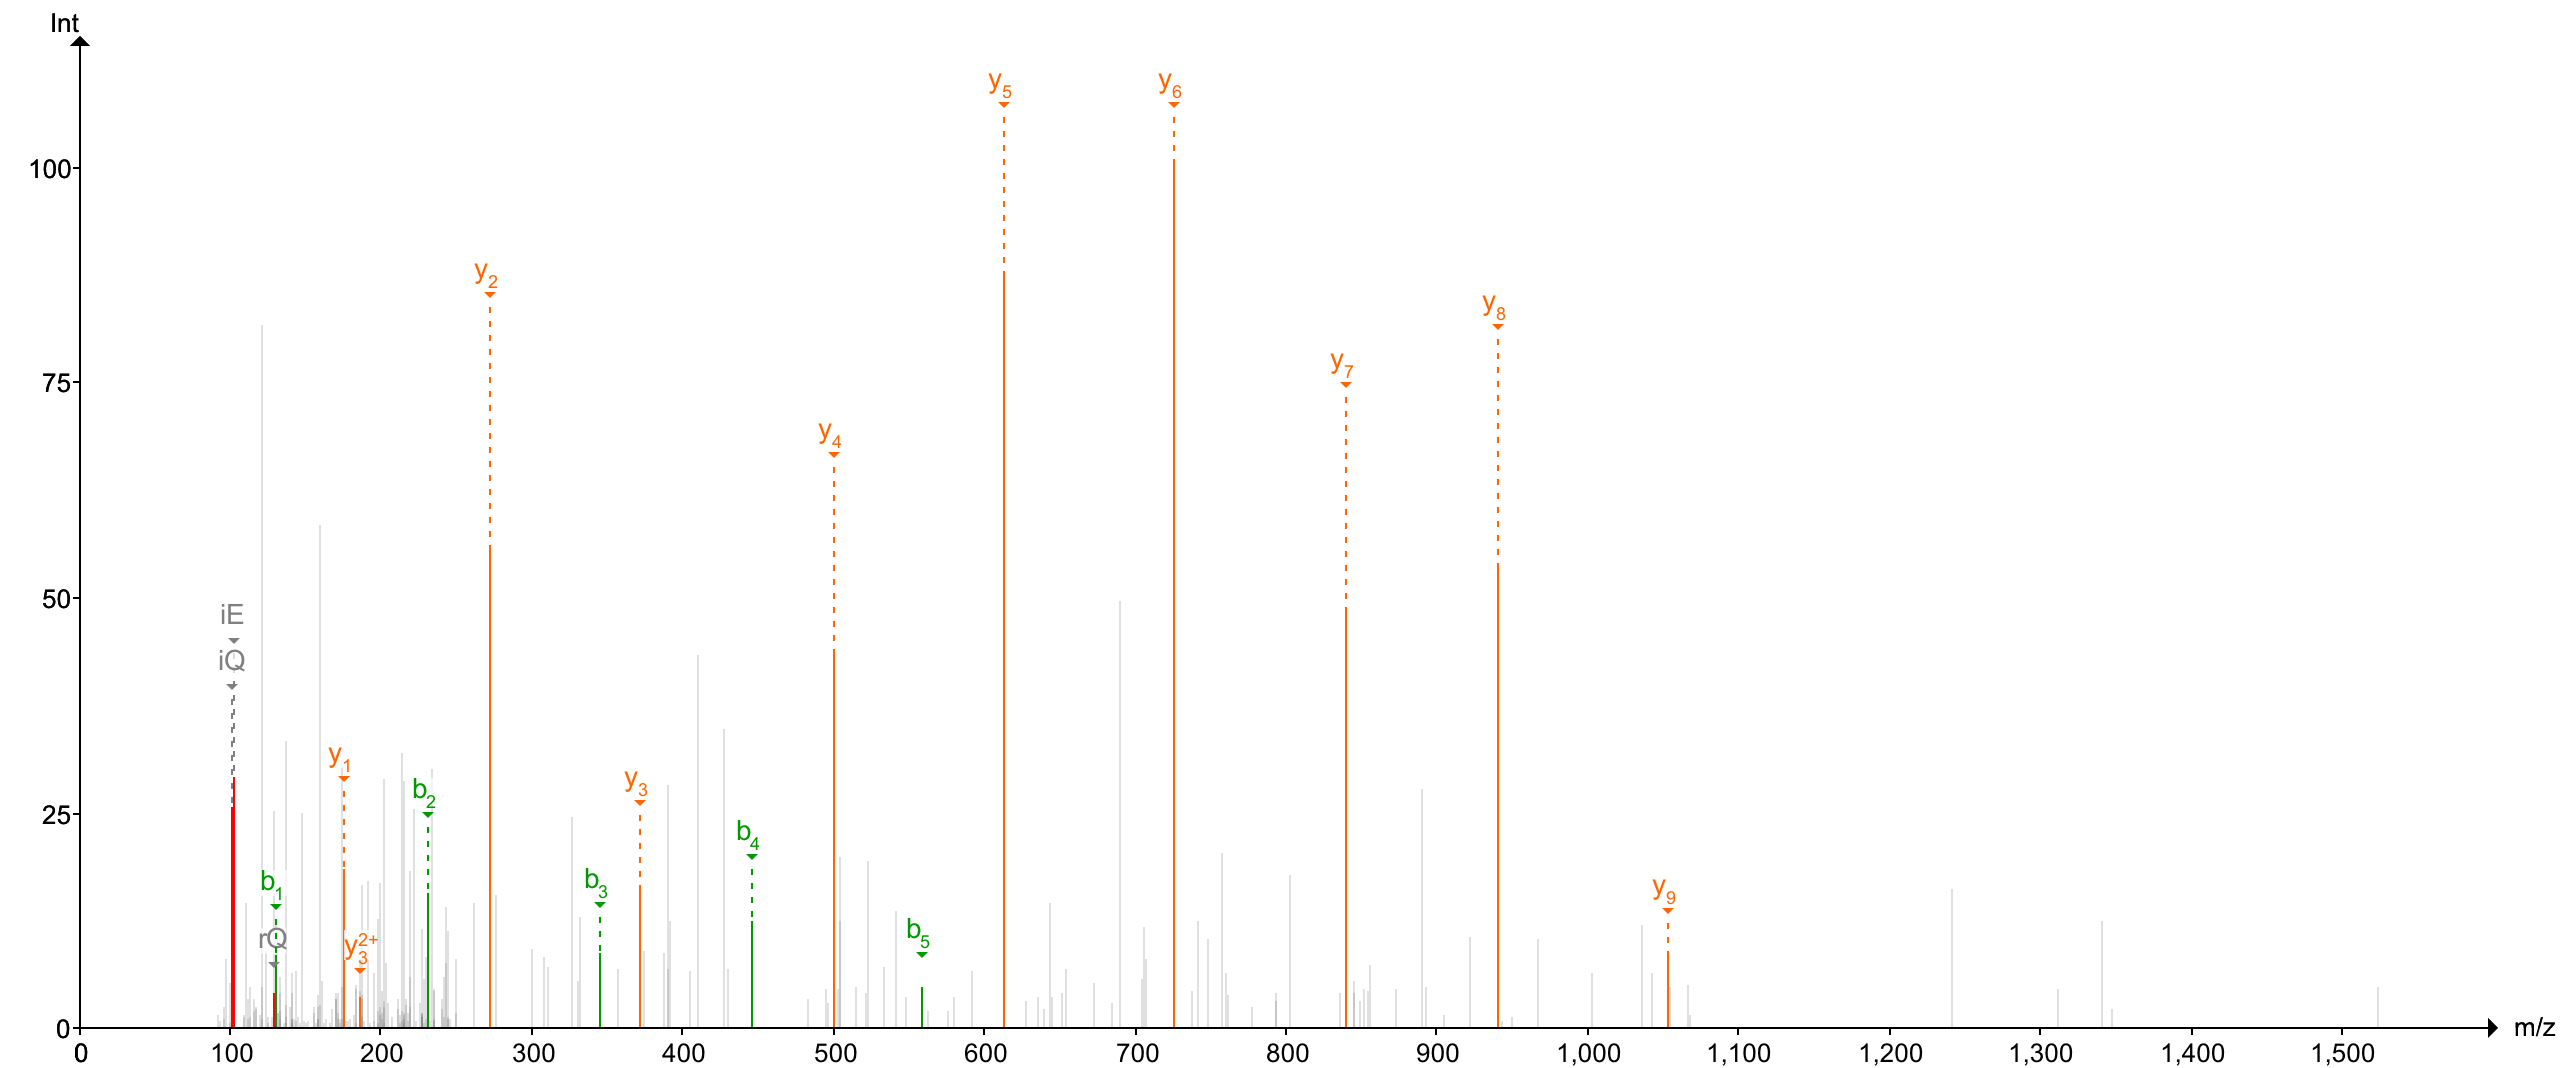

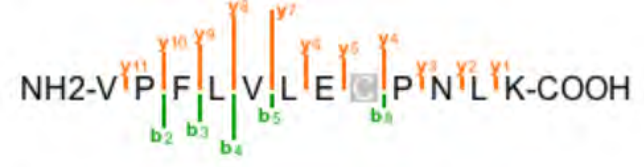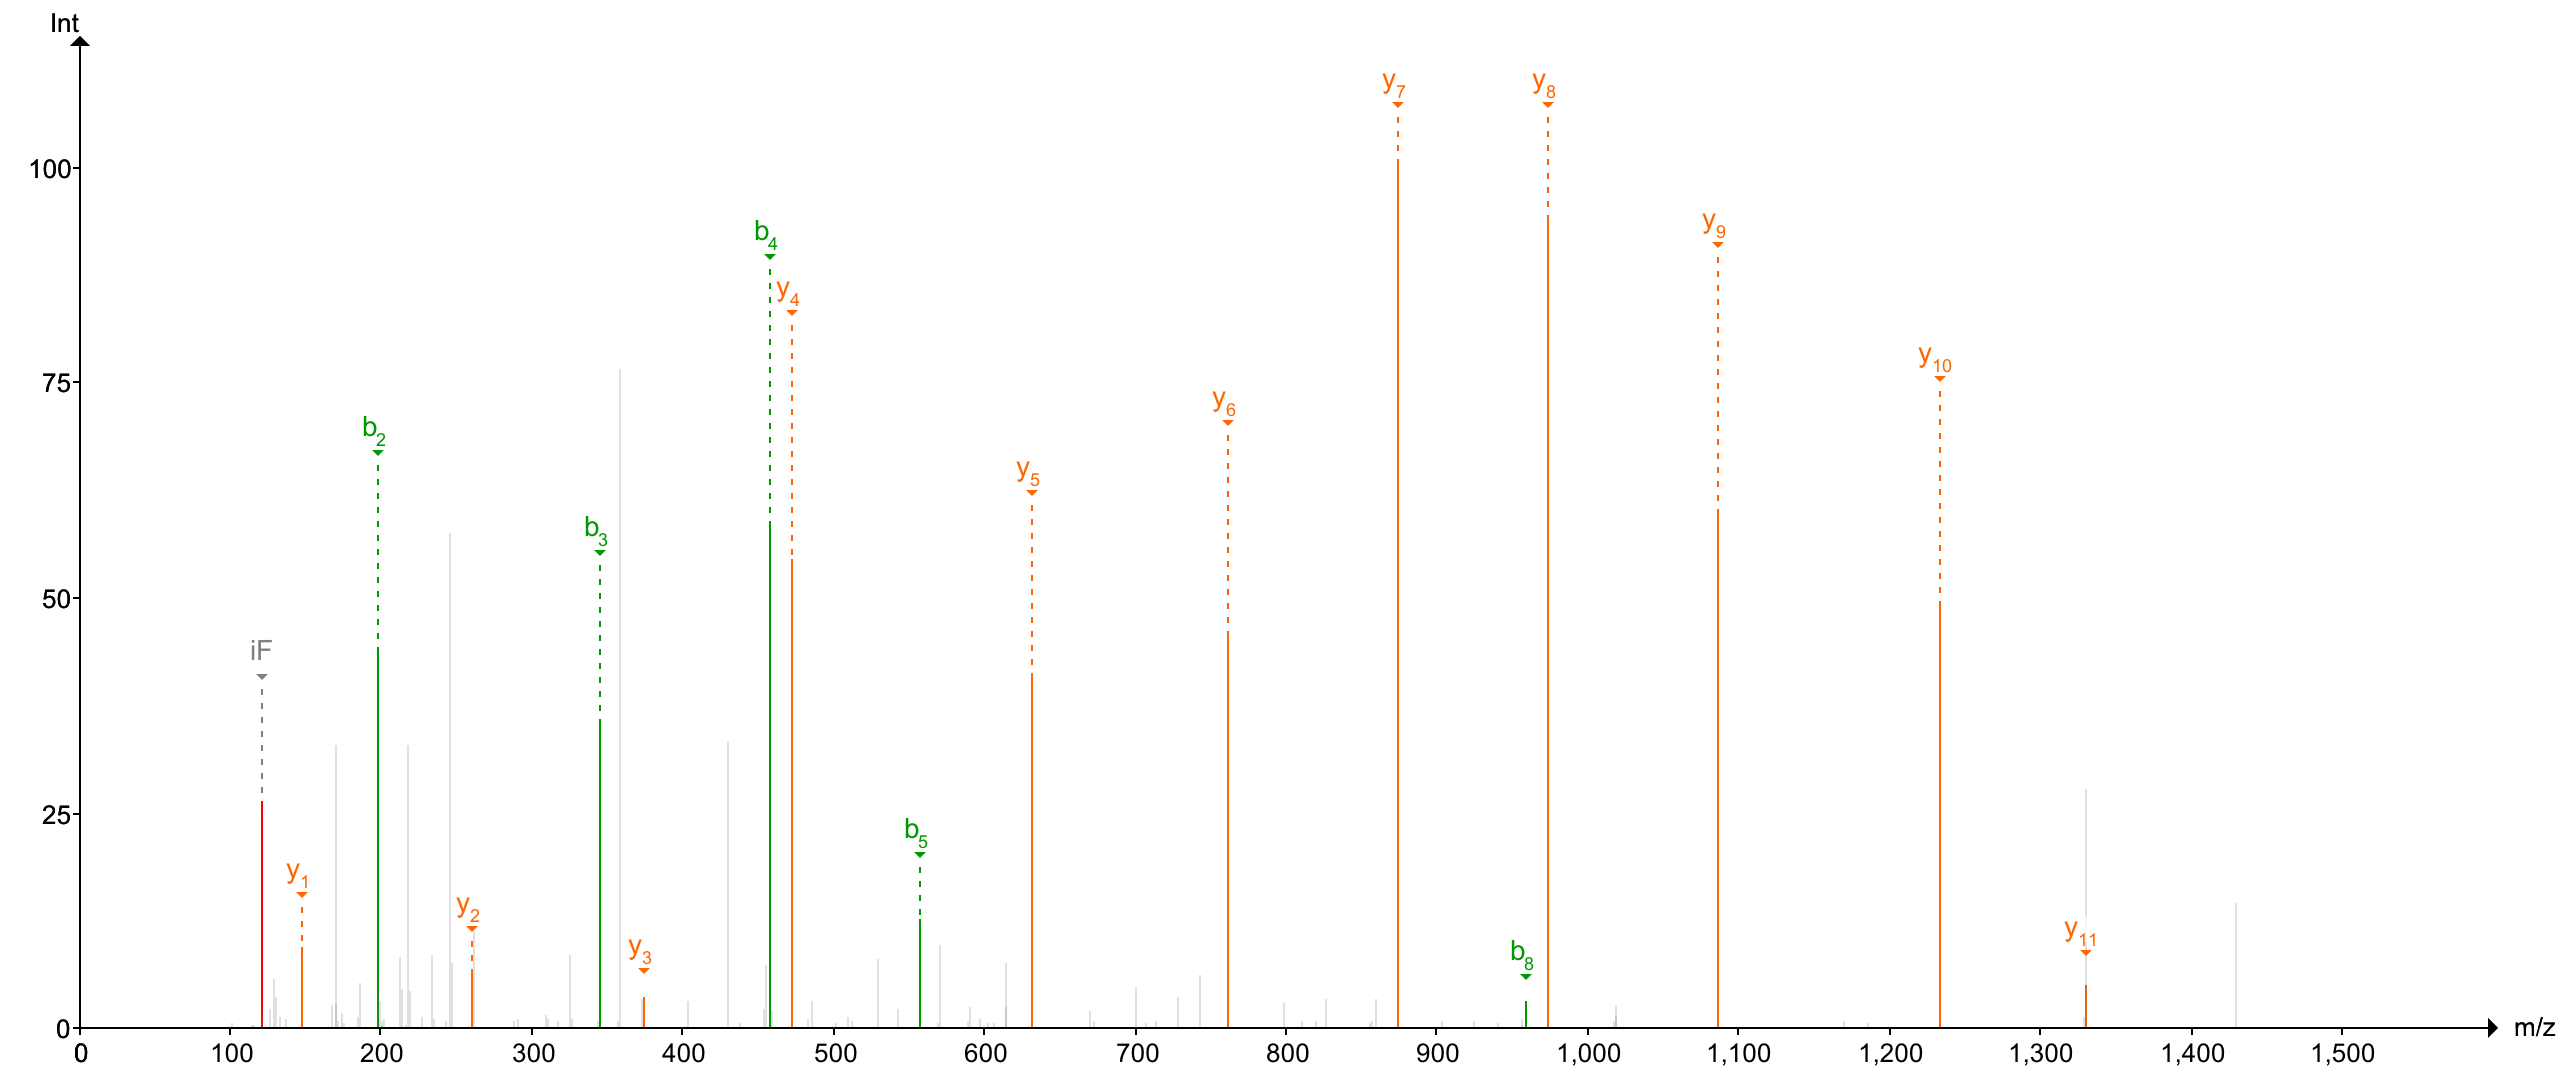



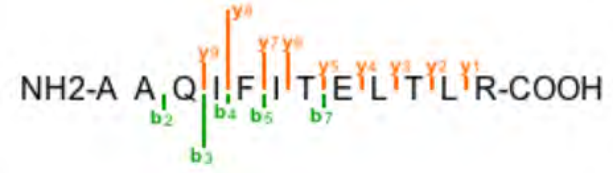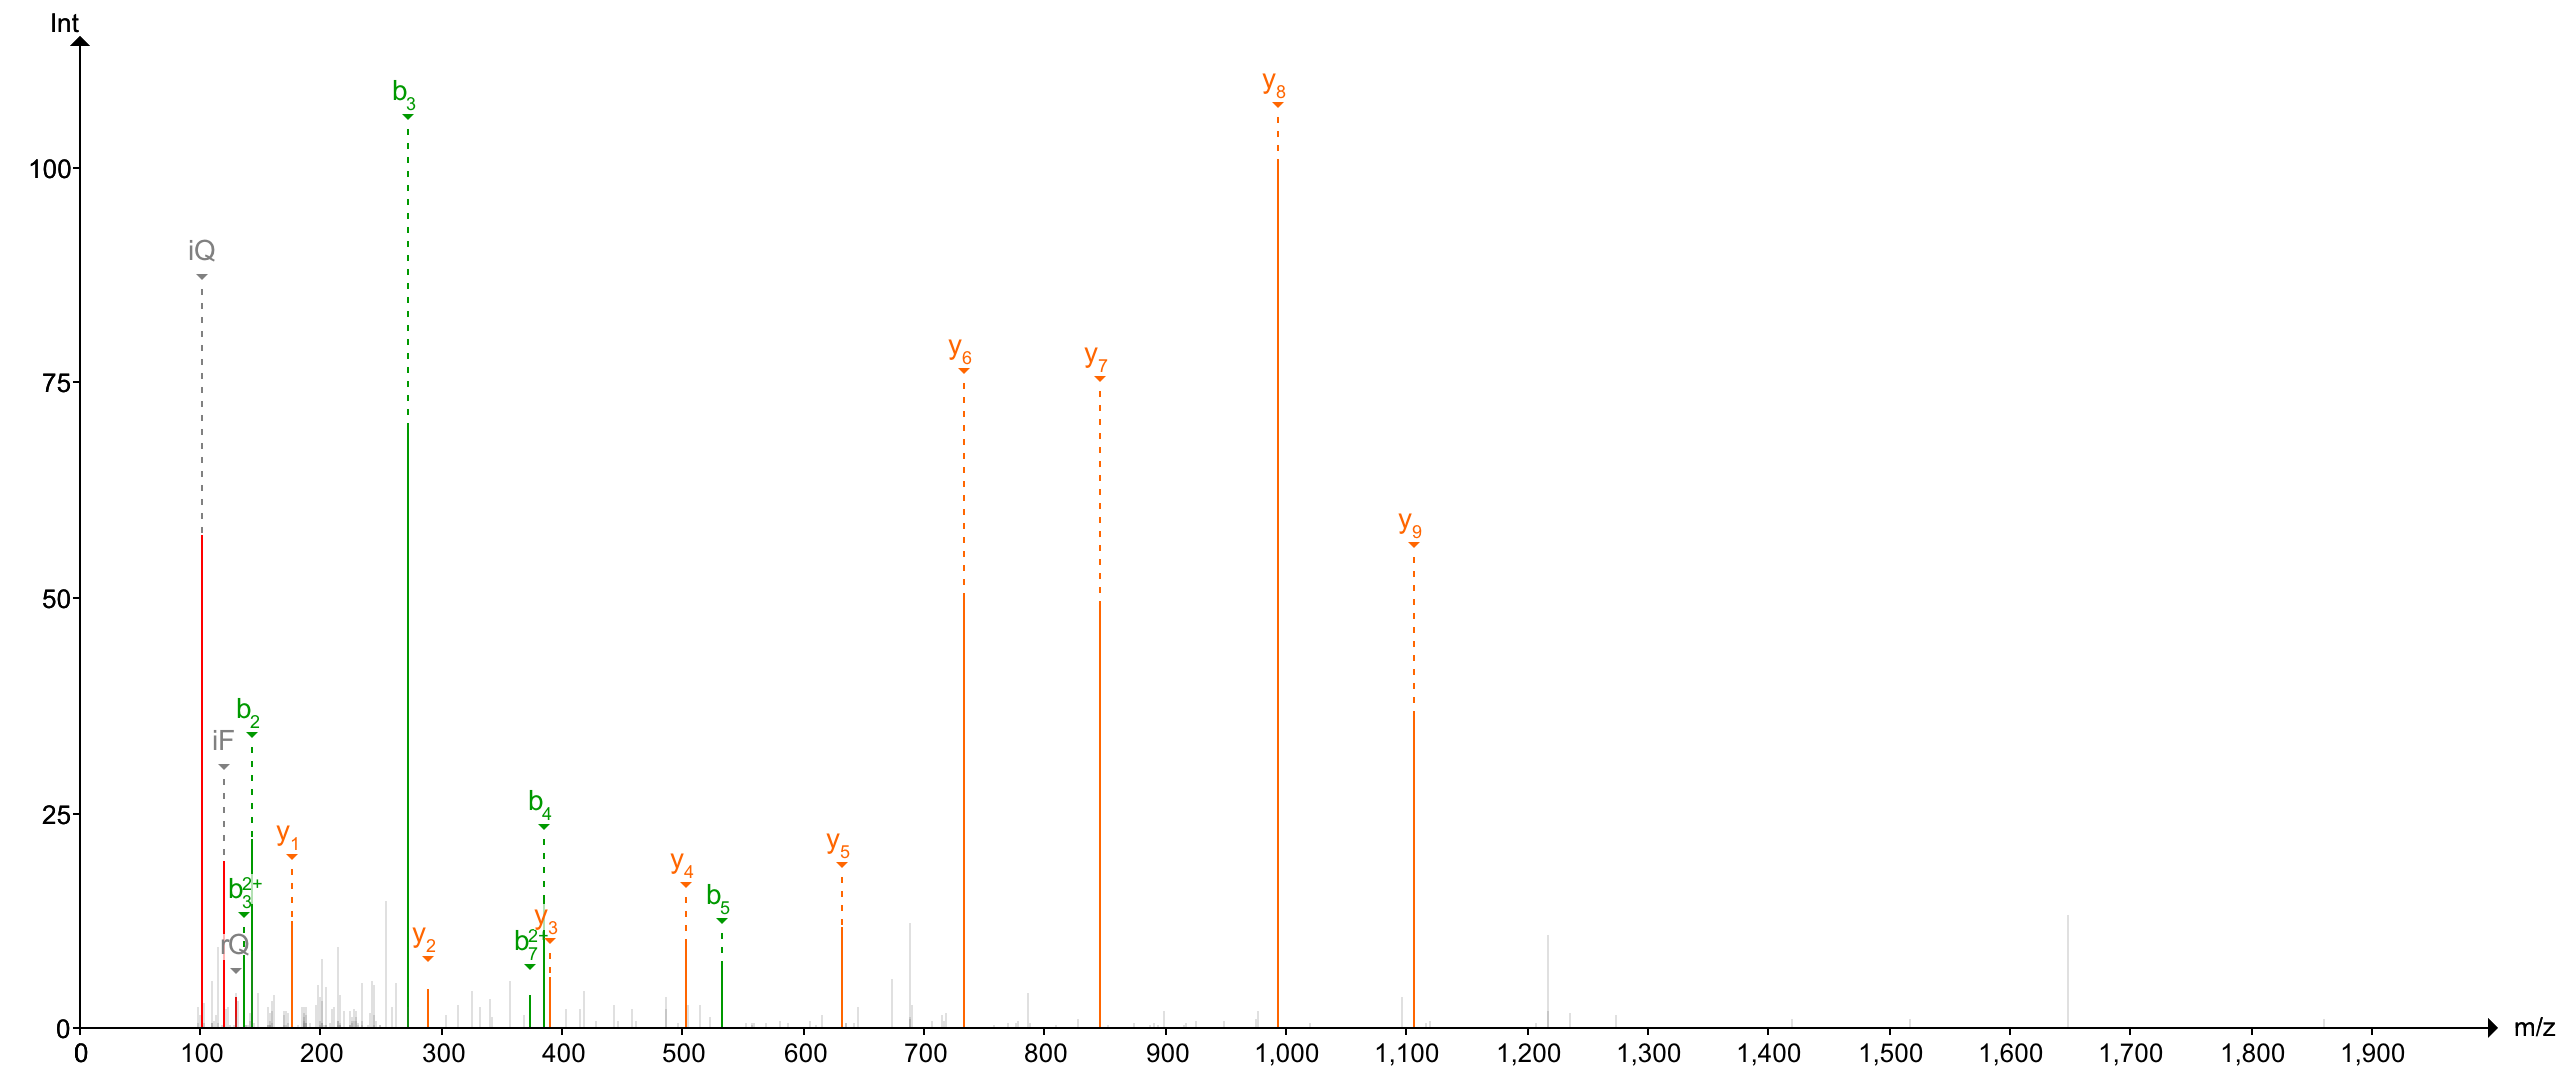

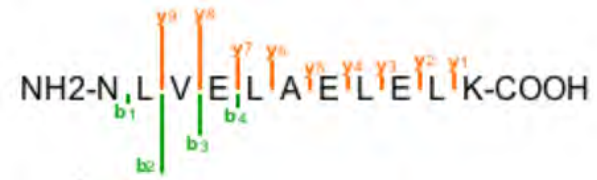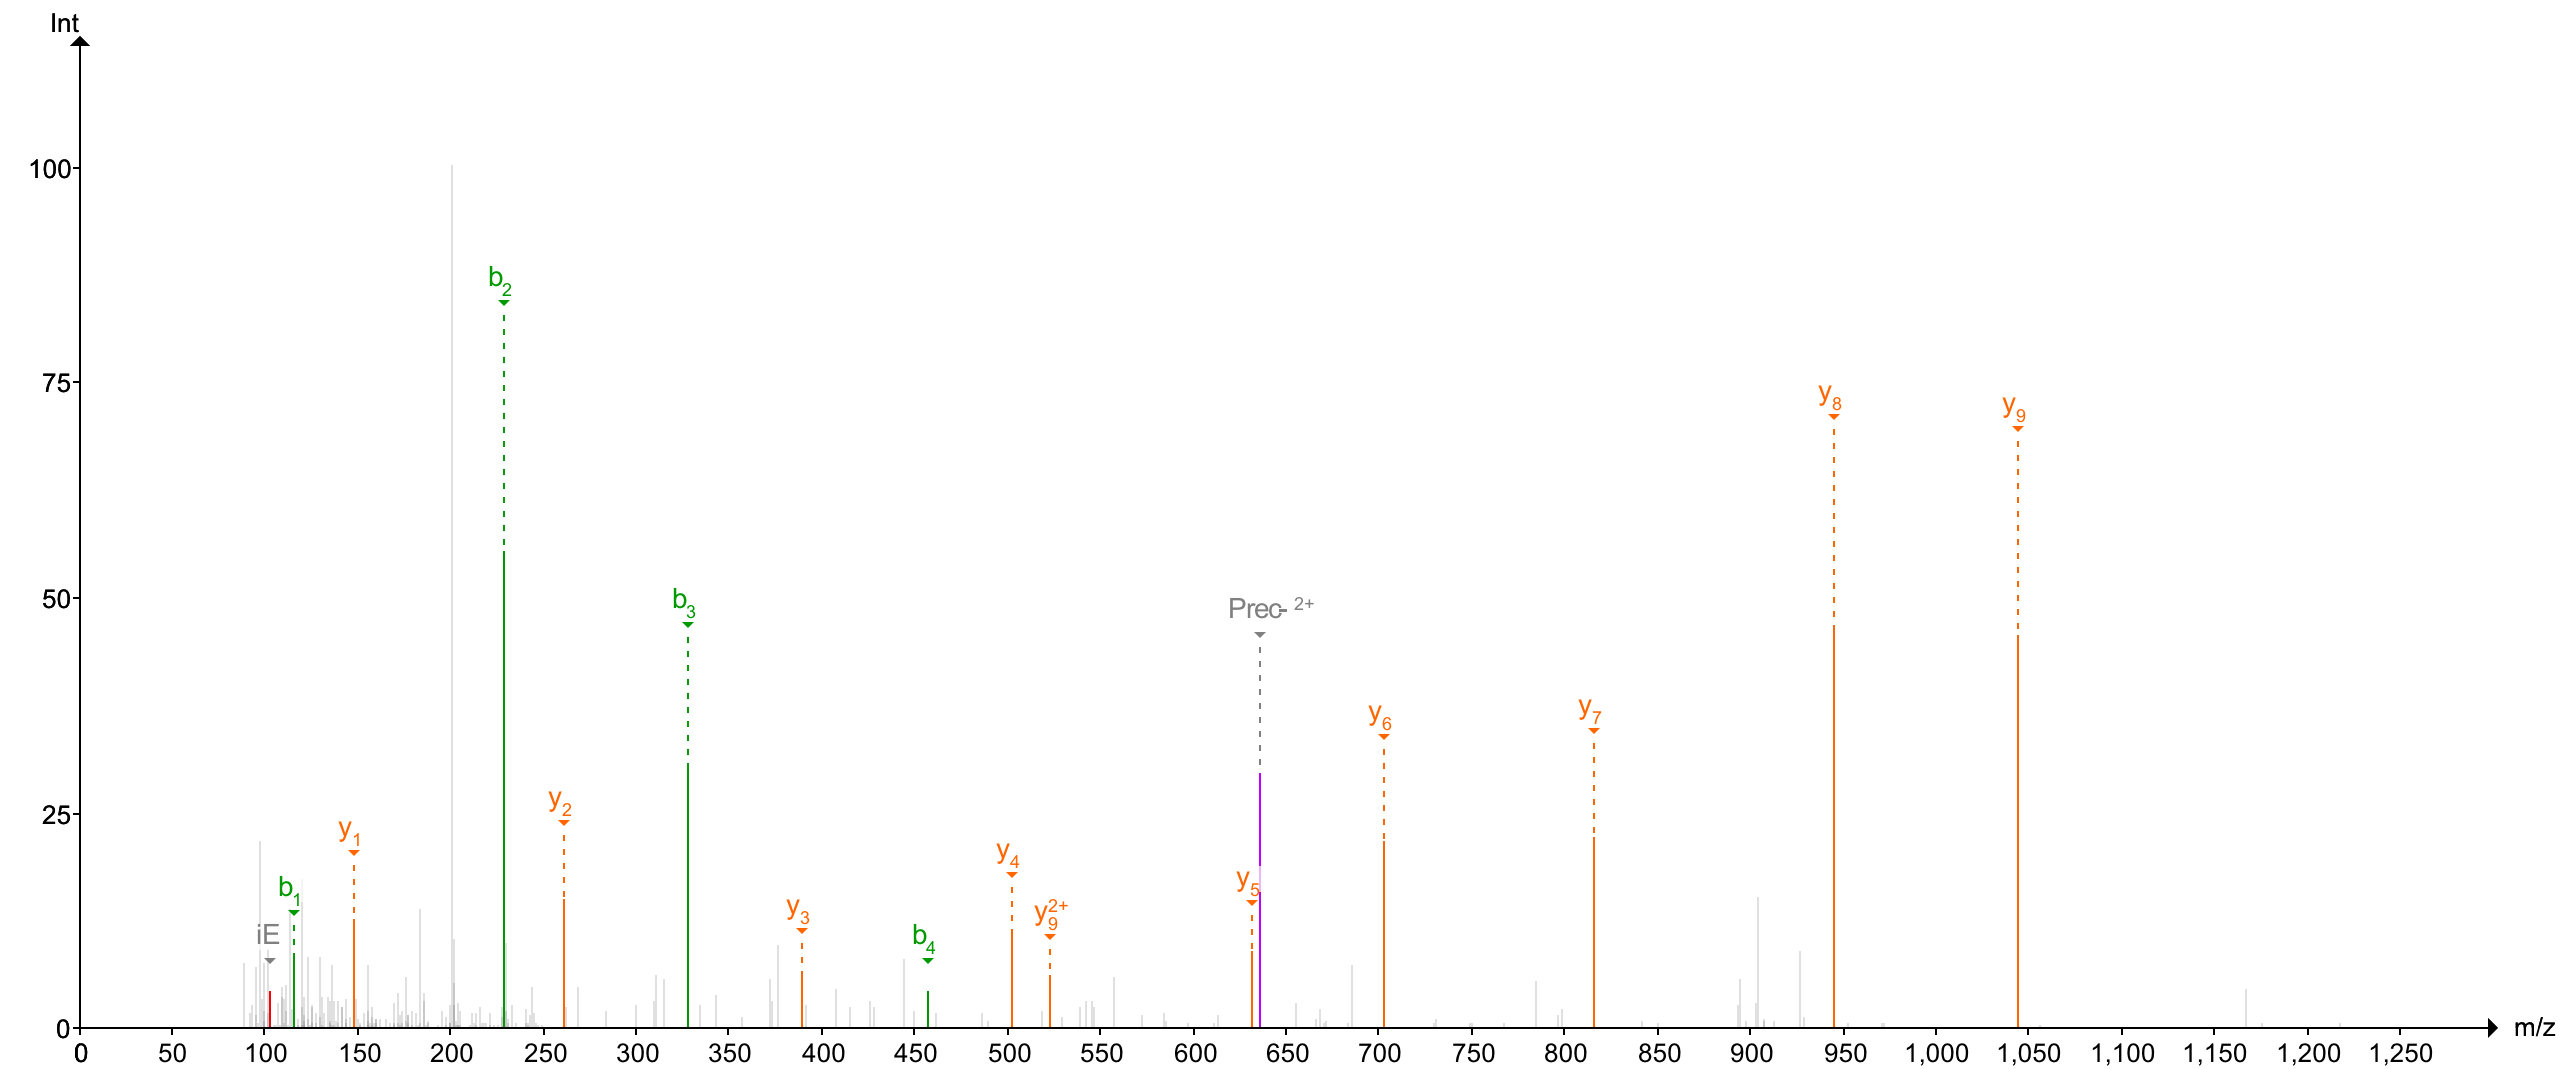

NH<sub>2</sub>-L<sup>y<sub>16</sub></sup>L<sup>y<sub>15</sub></sup>L<sup>b<sub>2</sub></sup>G<sup>b<sub>3</sub></sup>G<sup>b<sub>4</sub></sup>Q<sup>y<sub>12</sub></sup>L<sup>y<sub>11</sub></sup>L<sup>b<sub>7</sub></sup>G<sup>y<sub>10</sub></sup>L<sup>y<sub>9</sub></sup>E<sup>y<sub>8</sub></sup>D<sup>y<sub>7</sub></sup>F<sup>y<sub>6</sub></sup>I<sup>y<sub>5</sub></sup>F<sup>y<sub>4</sub></sup>A<sup>y<sub>3</sub></sup>H<sup>y<sub>2</sub></sup>V<sup>y<sub>1</sub></sup>K-COOH

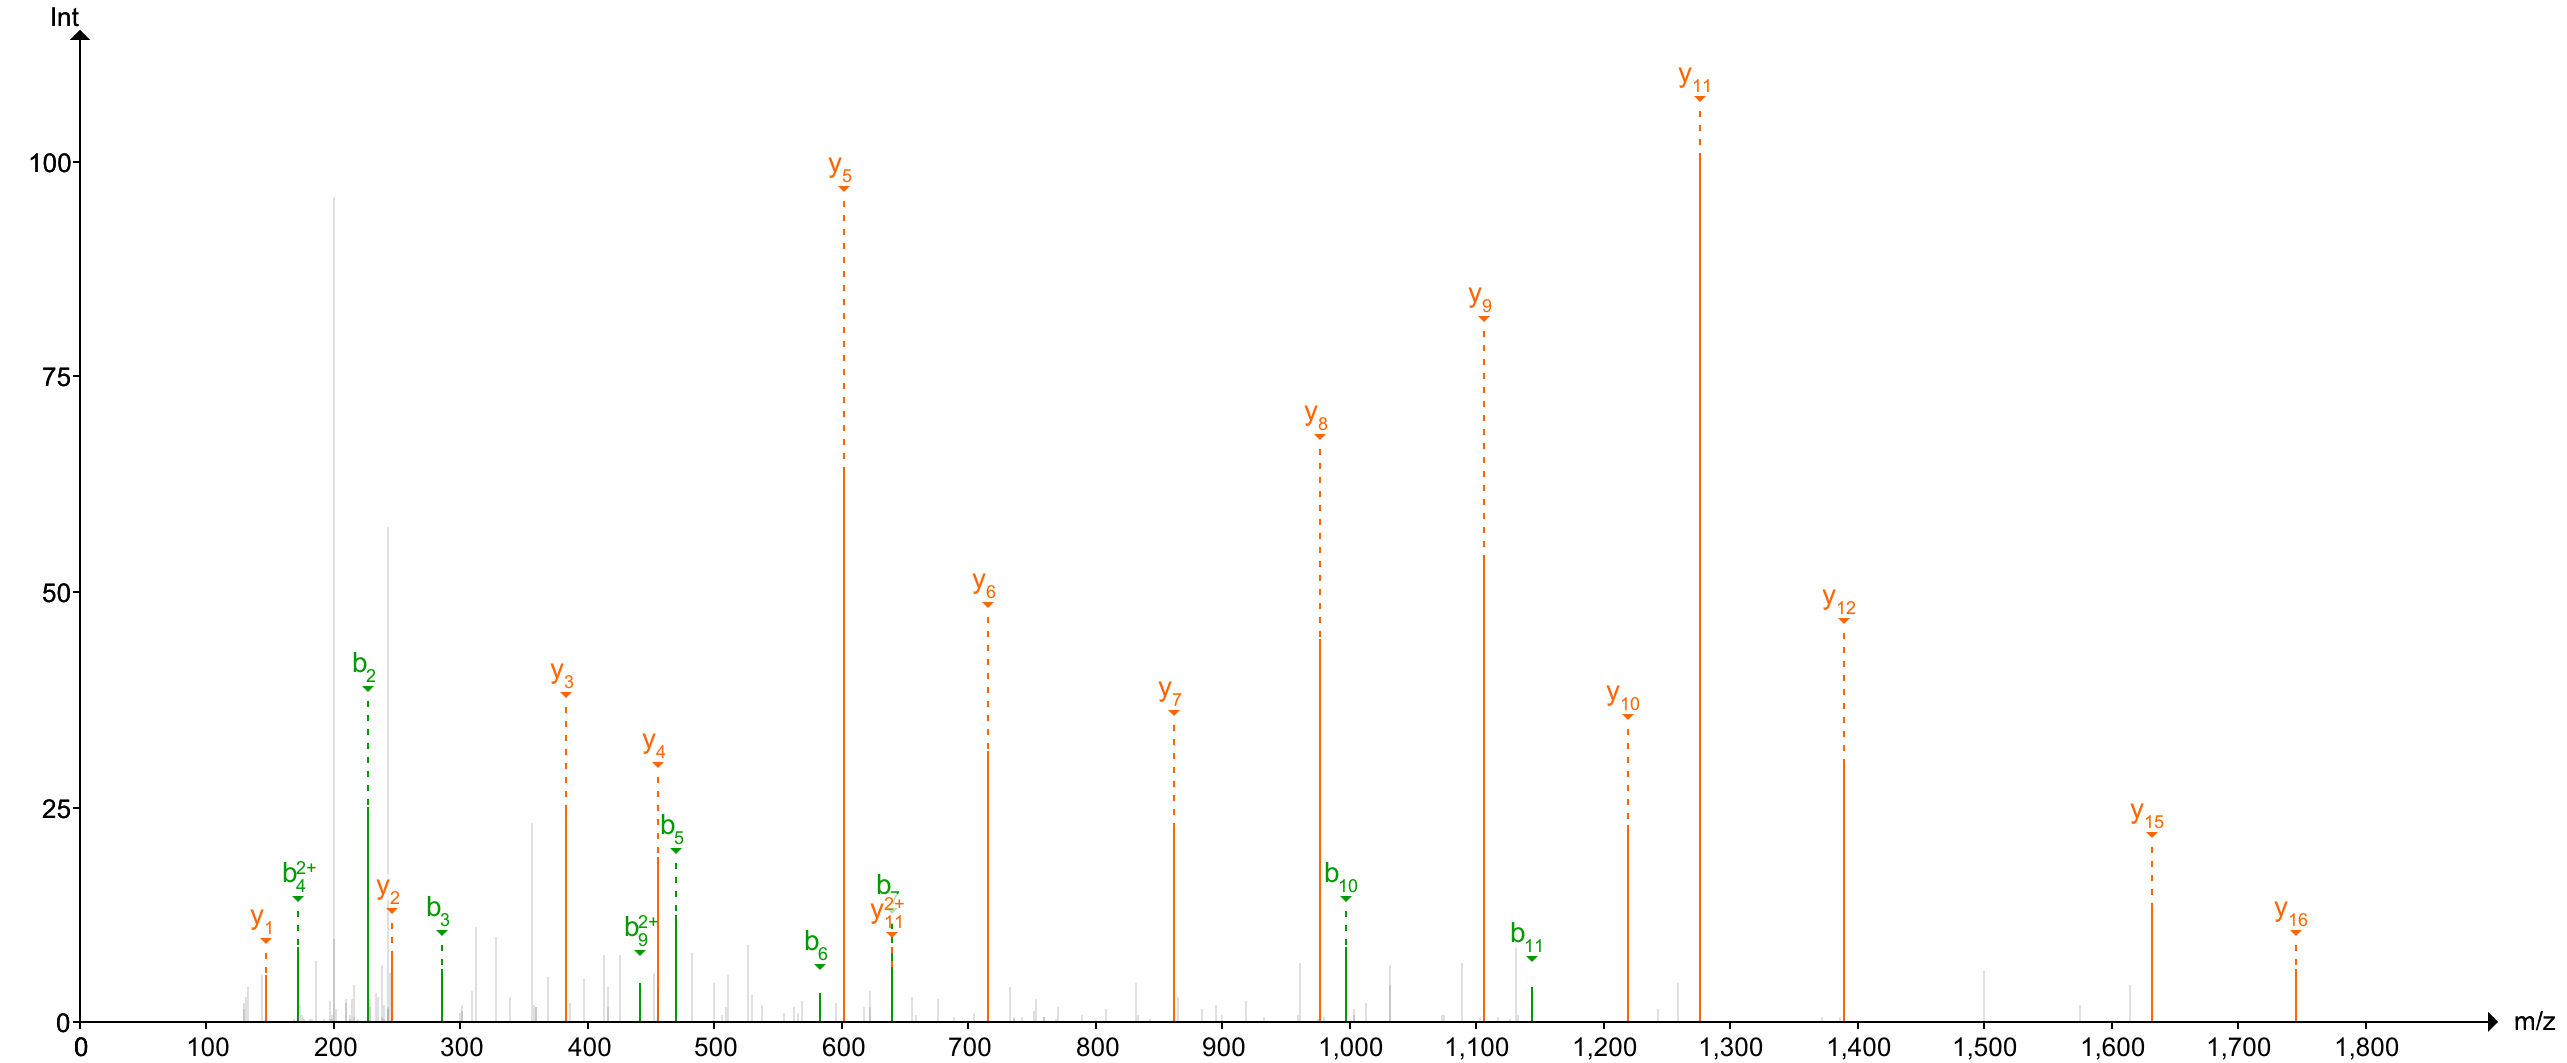

NH<sub>2</sub>-Q V<sub>1</sub>S<sub>1</sub>L E V<sub>1</sub>I<sub>1</sub>P<sub>1</sub>N<sub>1</sub>W<sub>1</sub>L<sub>1</sub>G<sub>1</sub>P<sub>1</sub>L<sub>1</sub>Q<sub>1</sub>N<sub>1</sub>L<sub>1</sub>L<sub>1</sub>H<sub>1</sub>I<sub>1</sub>R-COOH

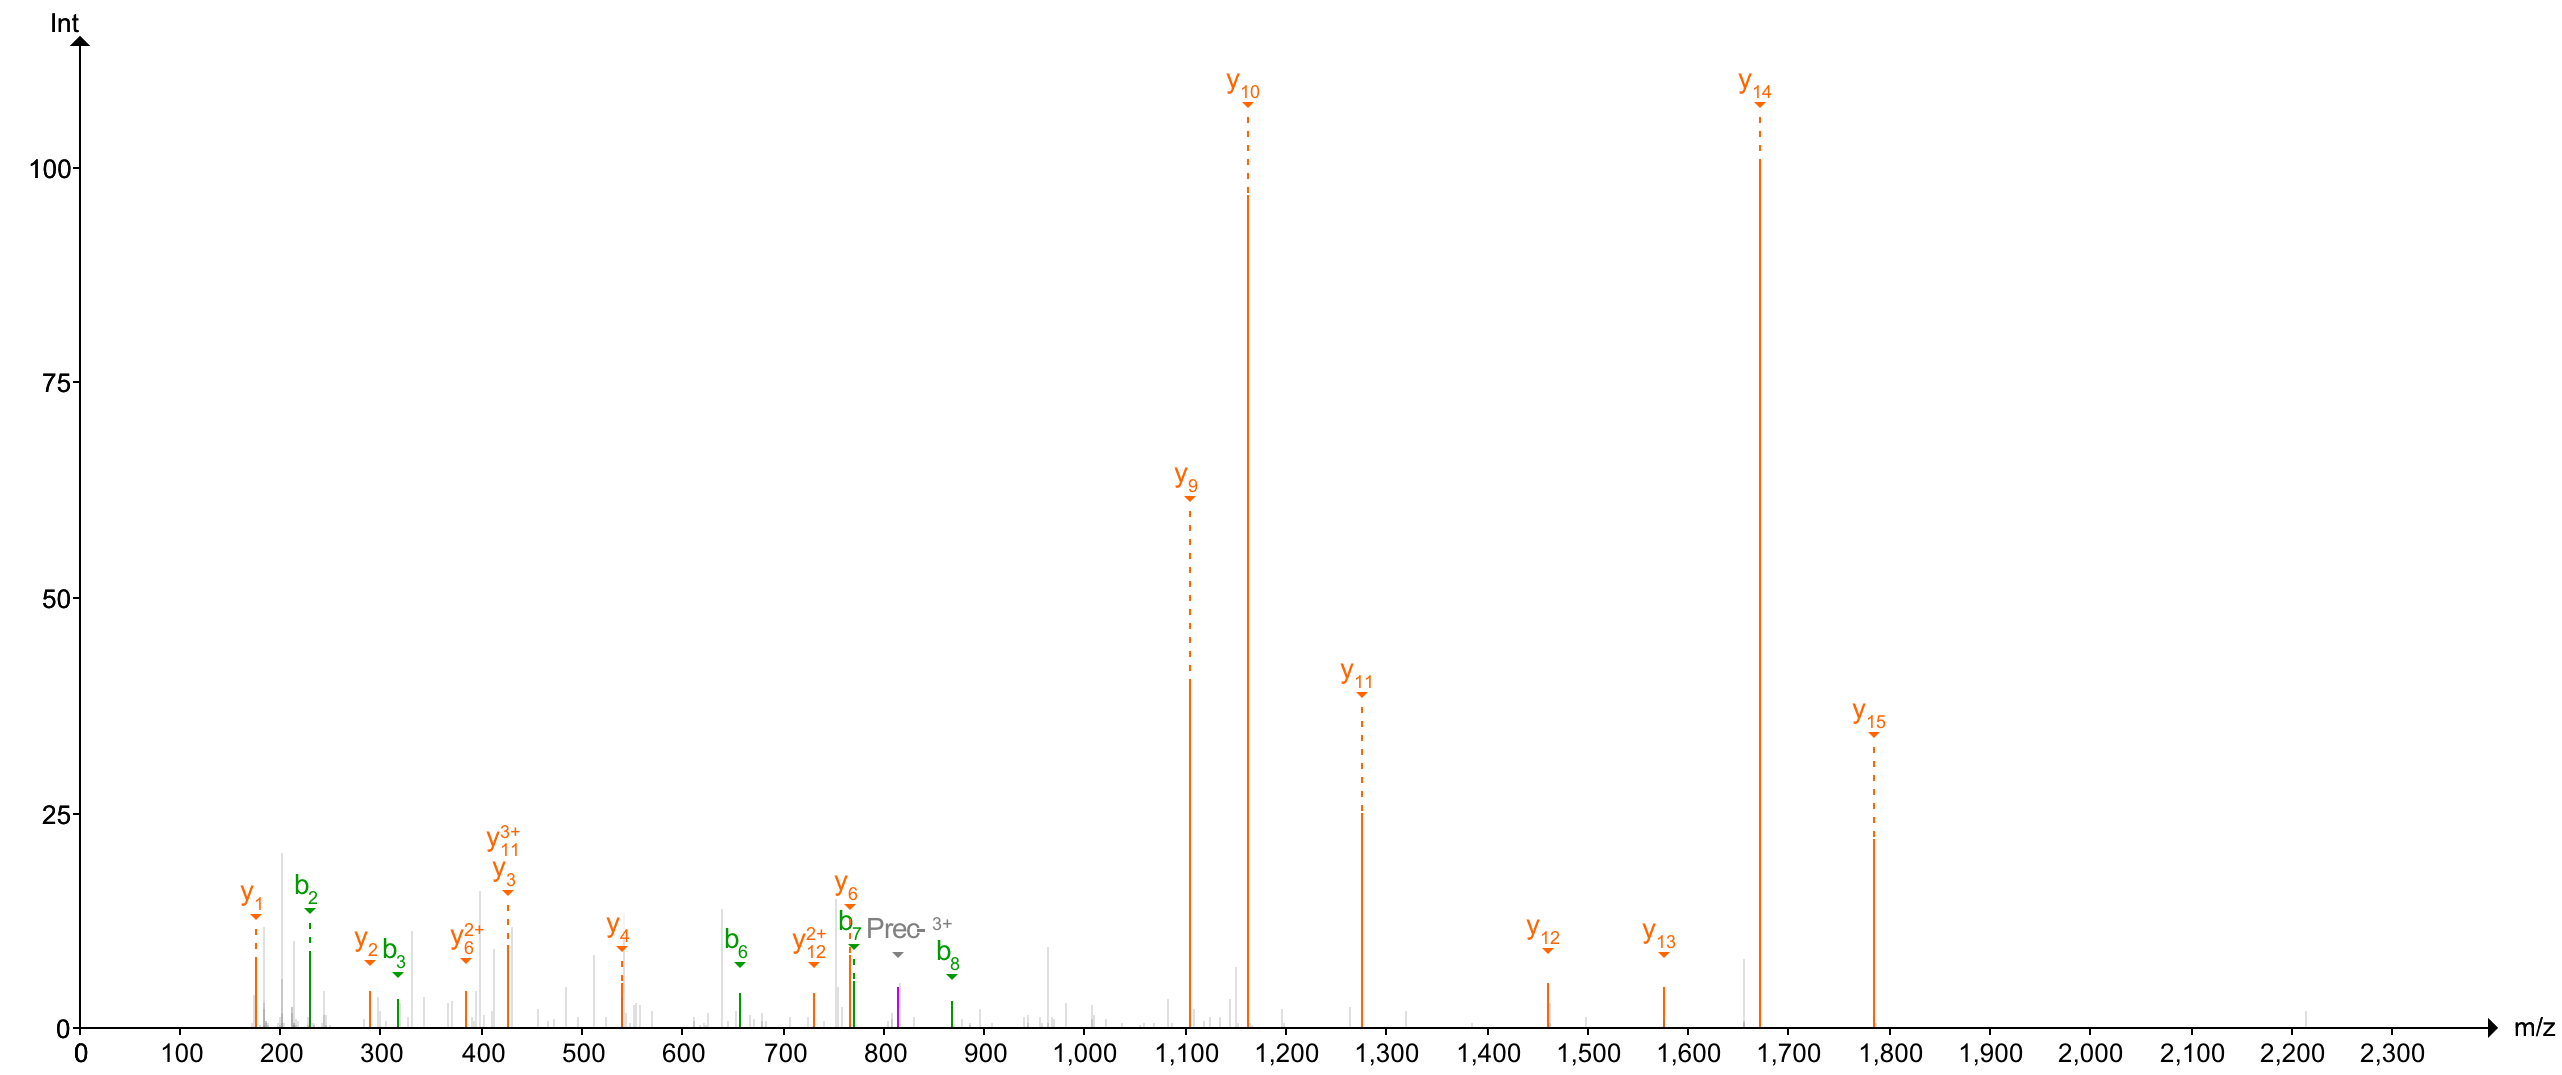

NH<sub>2</sub>-I Q<sub>1</sub>A<sub>1</sub>S G<sub>1</sub>I<sub>1</sub>L<sub>1</sub>Q<sub>1</sub>L<sub>1</sub>F<sub>1</sub>A<sub>1</sub>S<sub>1</sub>L<sub>1</sub>L<sub>1</sub>T<sub>1</sub>P Q<sub>1</sub>S<sub>1</sub>S<sub>1</sub> K-COOH

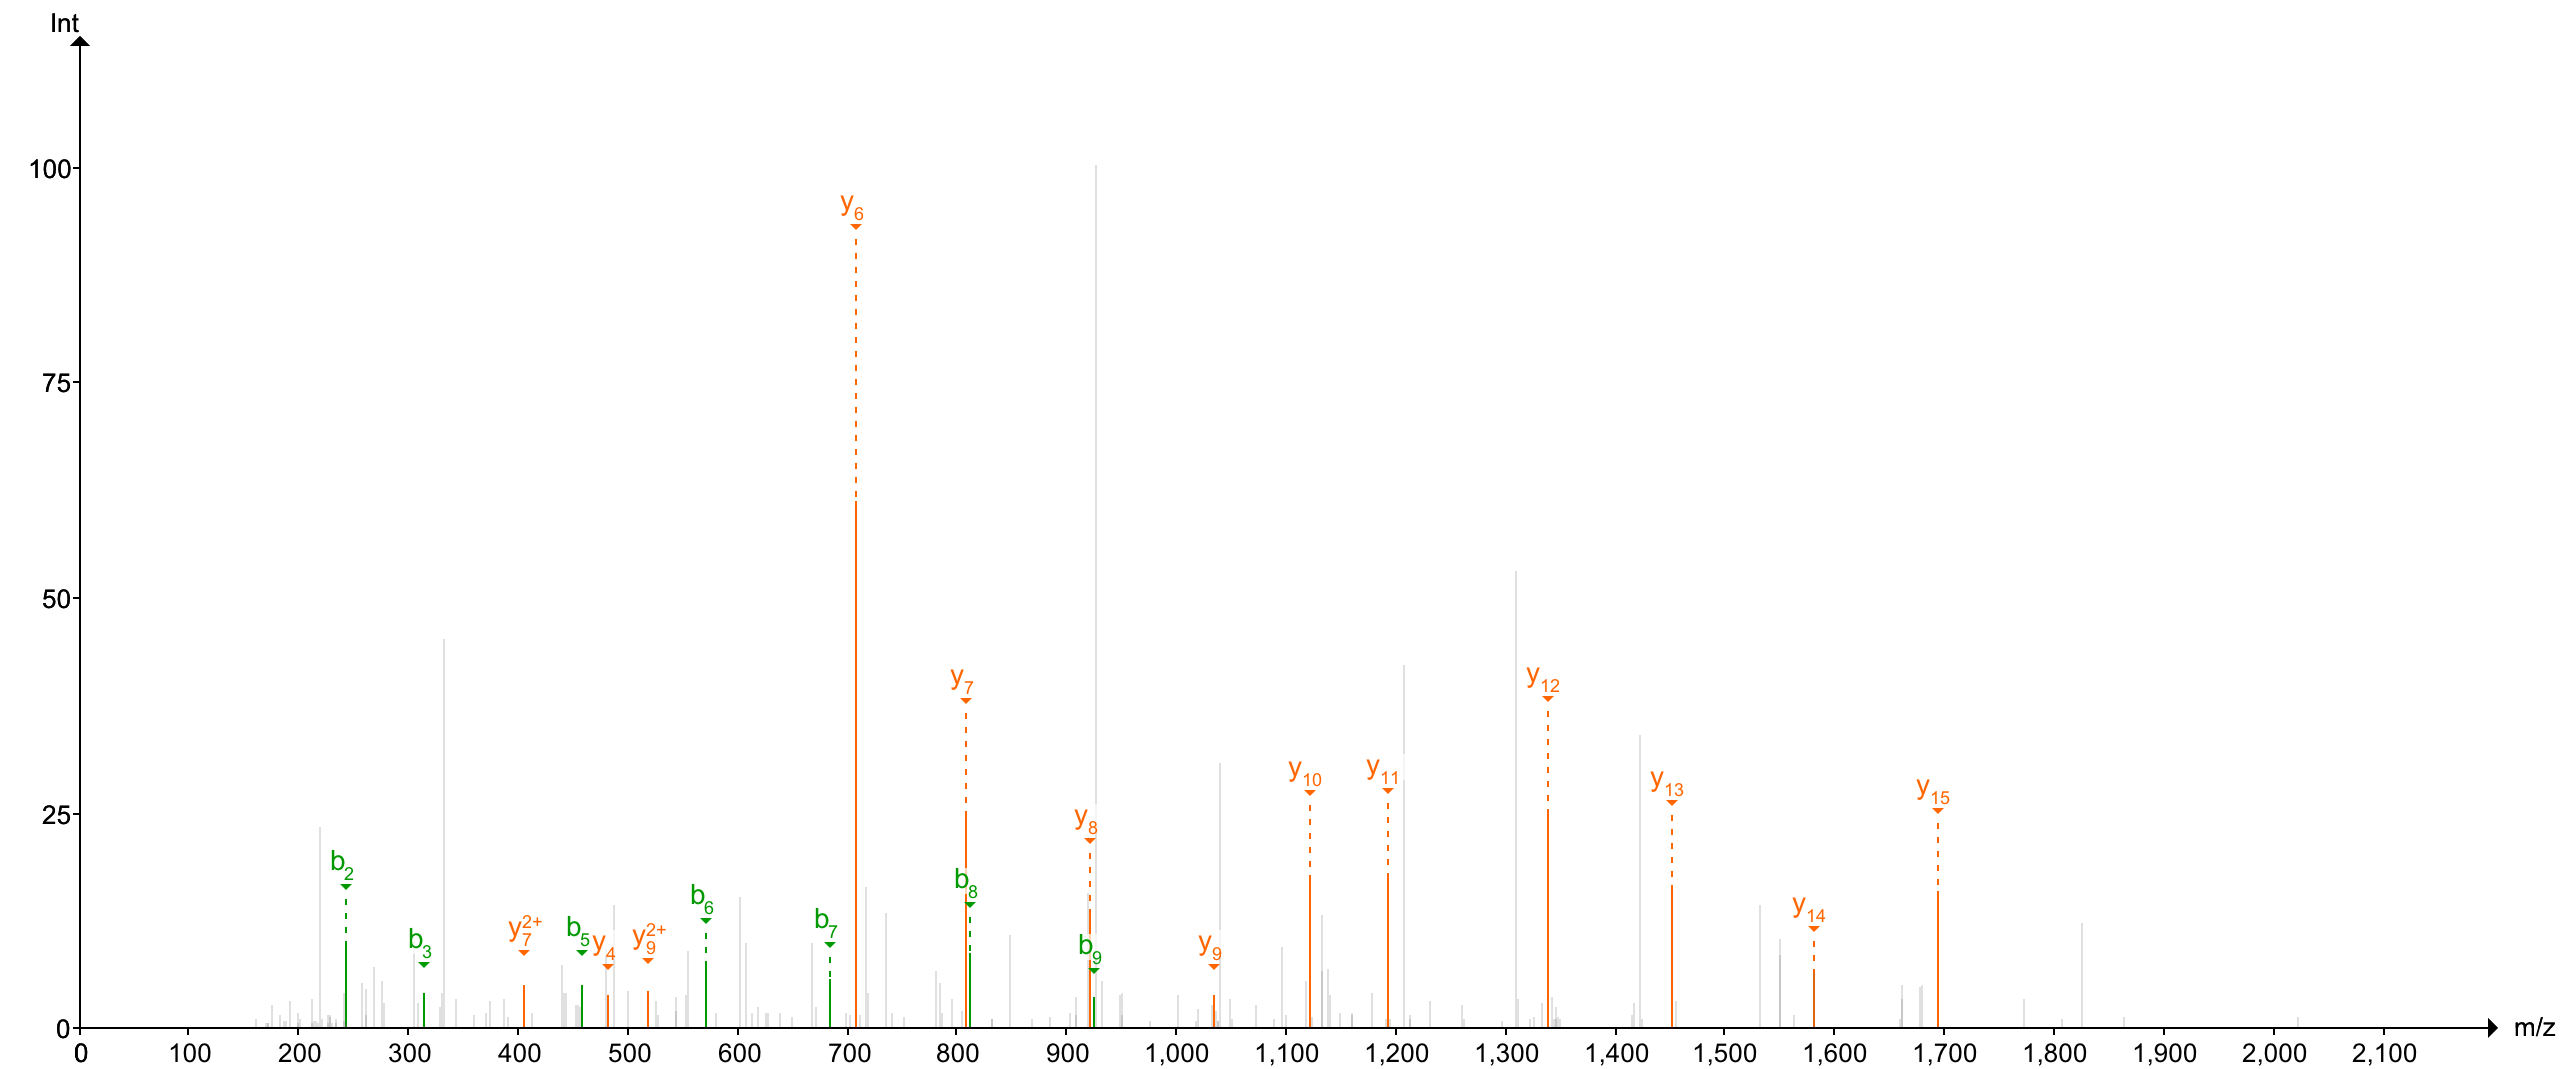

NH<sub>2</sub>-G F A T V L A E A V I T S L D L P V A I I N L K-COOH

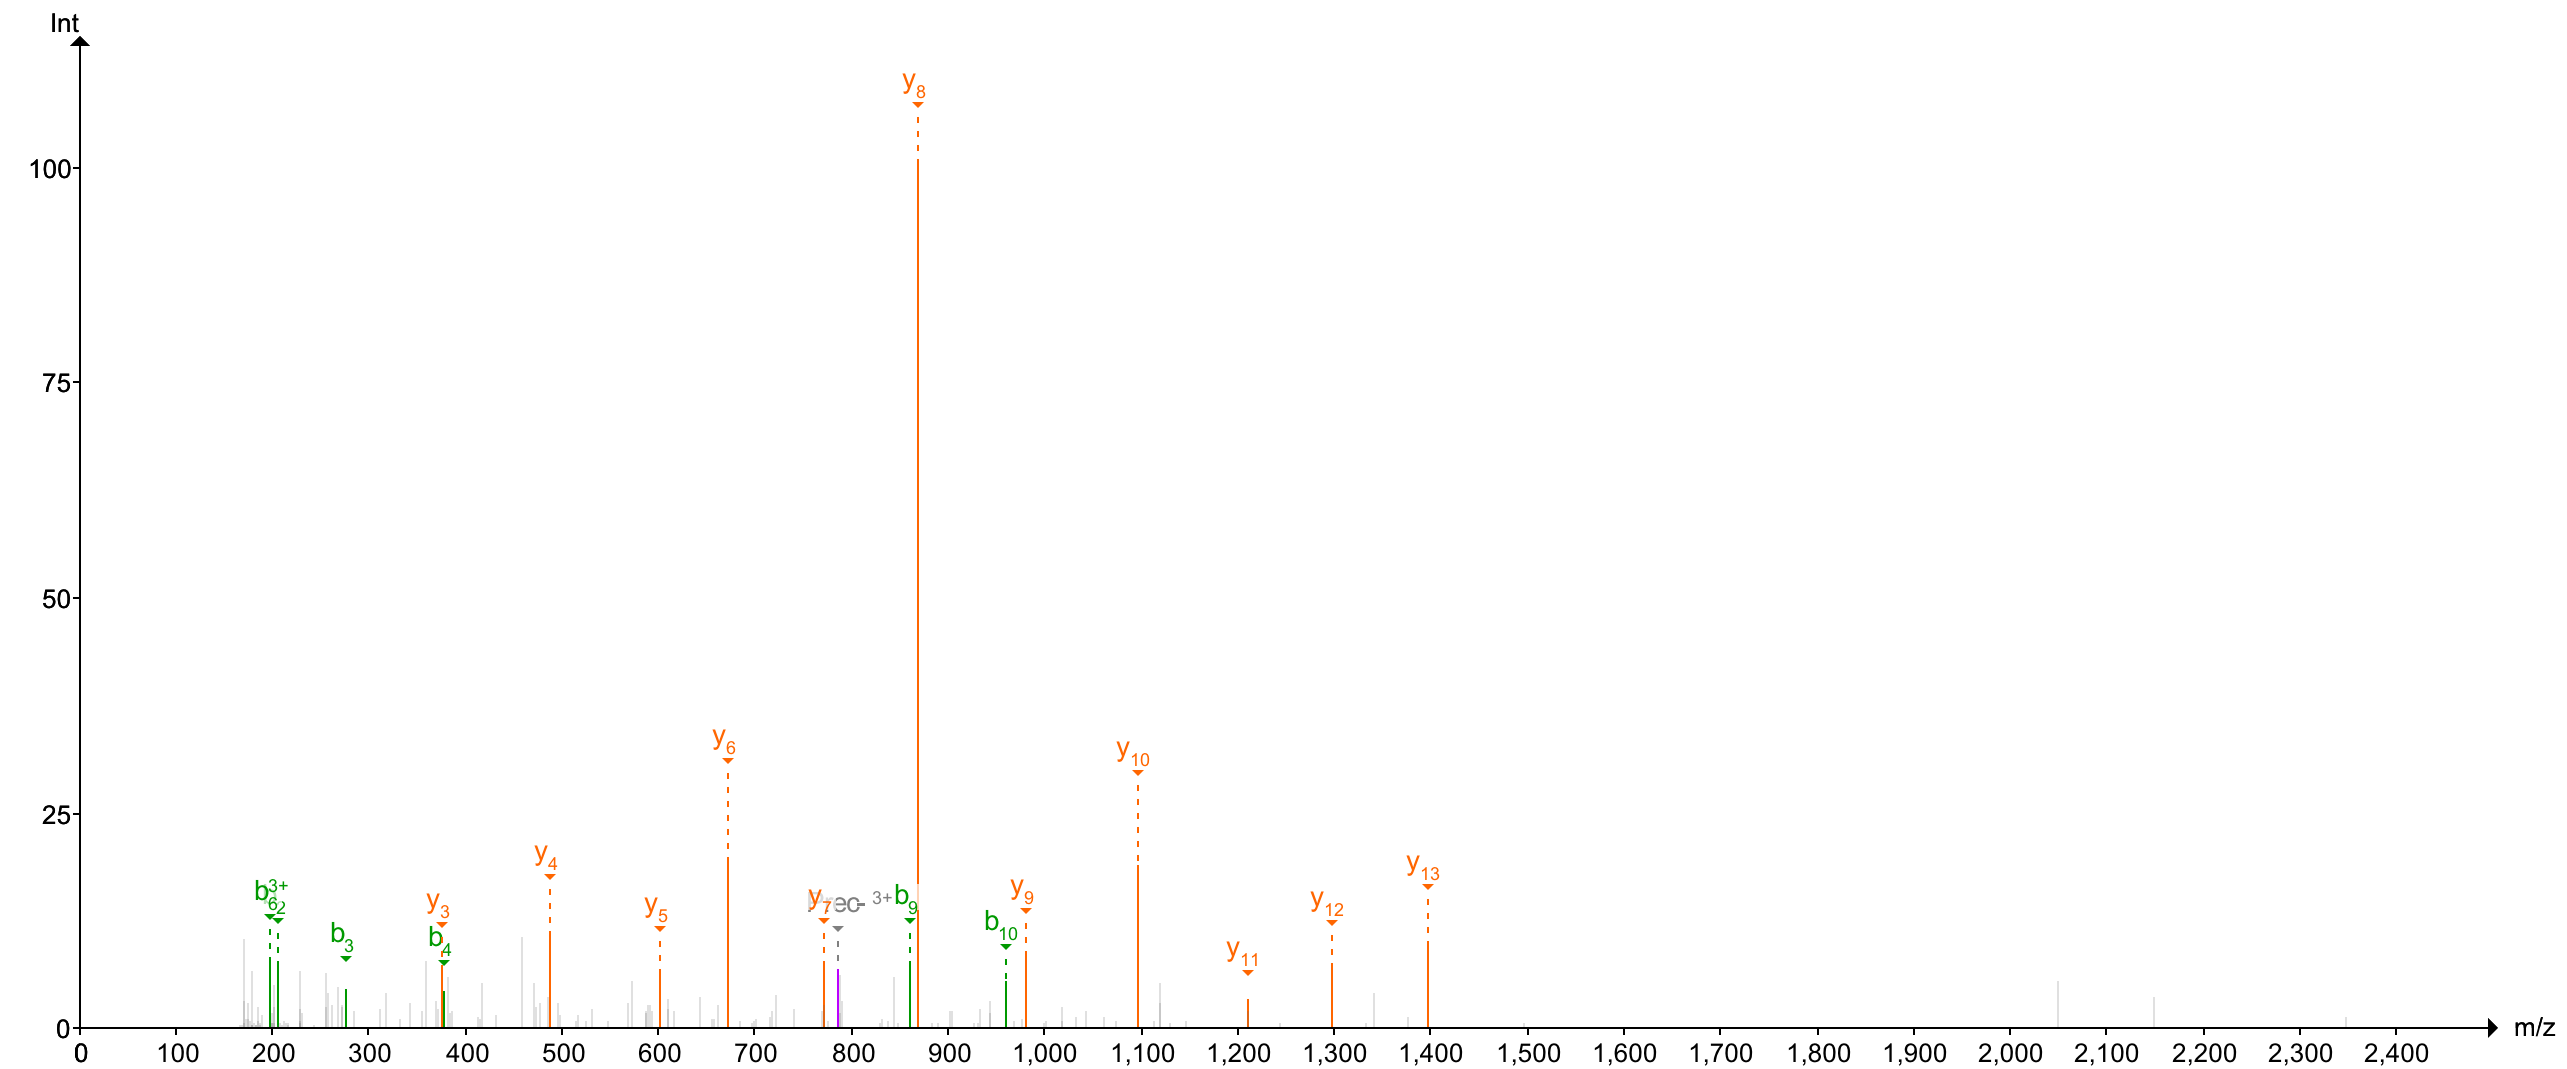

Supplement: 153598_1_supp_395205_pxvm6j.pdf [file 153598_1_supp_395205_pxvm6j.pdf]
