# Supplementary material
Source: PubMed Central journal article supplement (PMC6885706)

**Fig. S1**

**A**

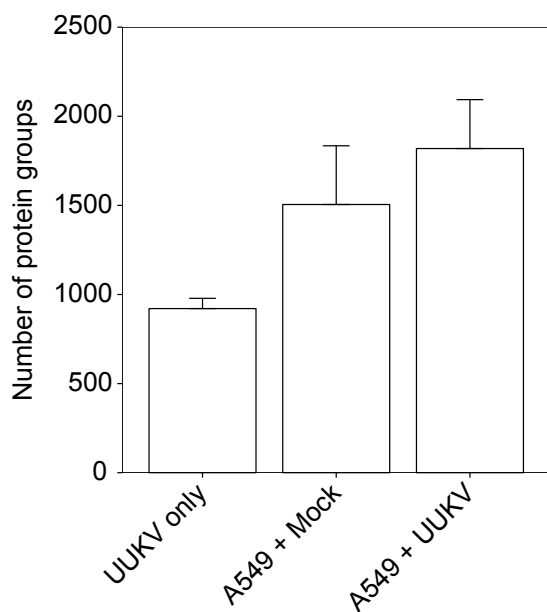

**B**

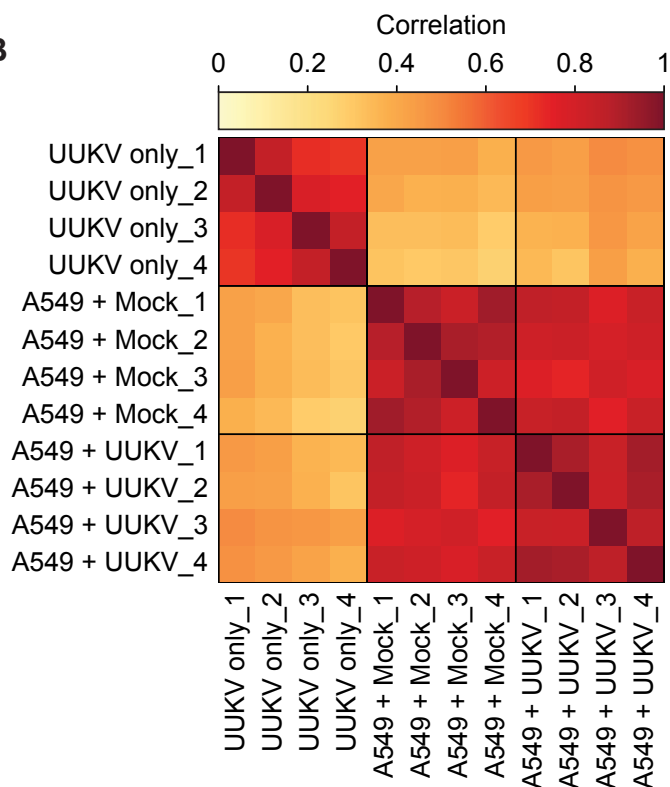

**C**

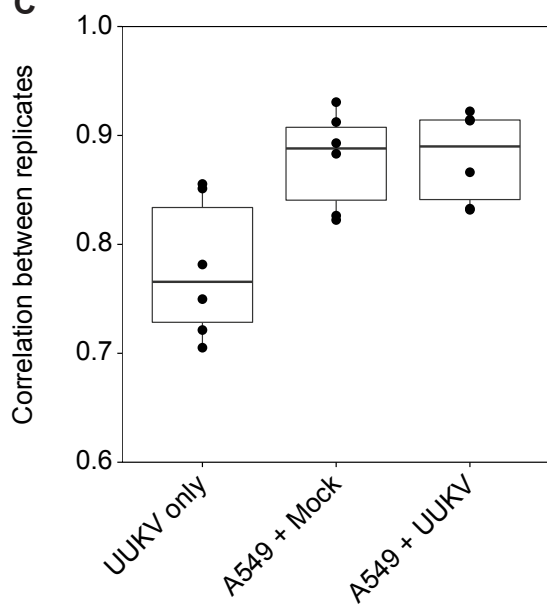

**D**

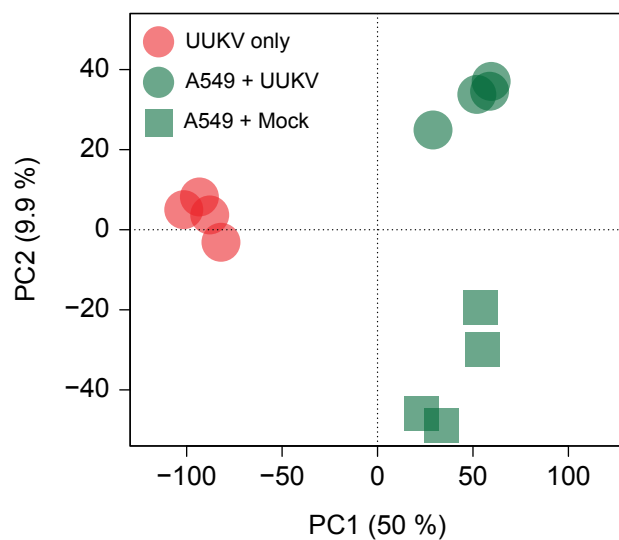

Fig. S2

A

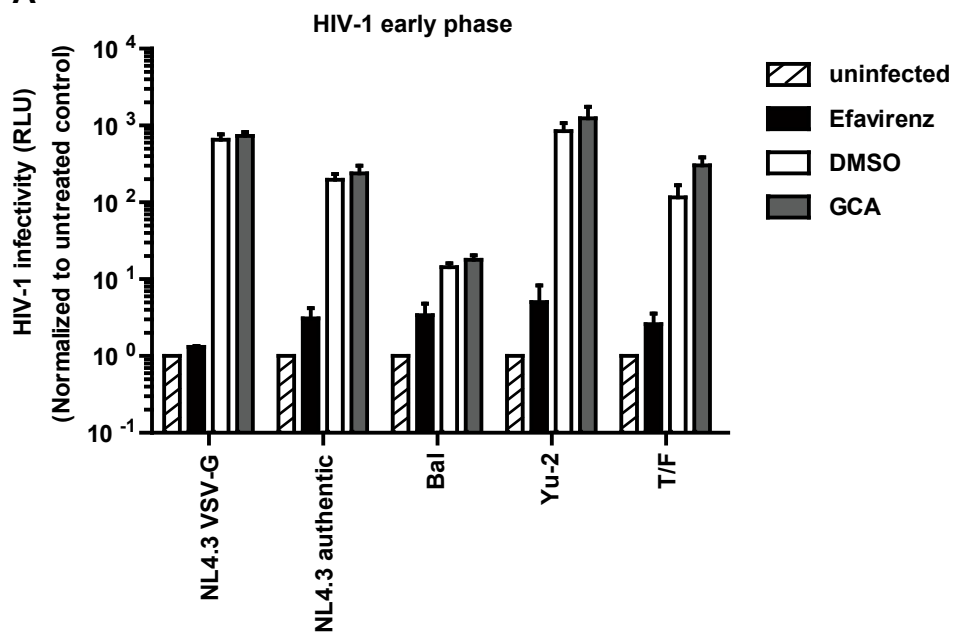

**Fig. S3**

**A**

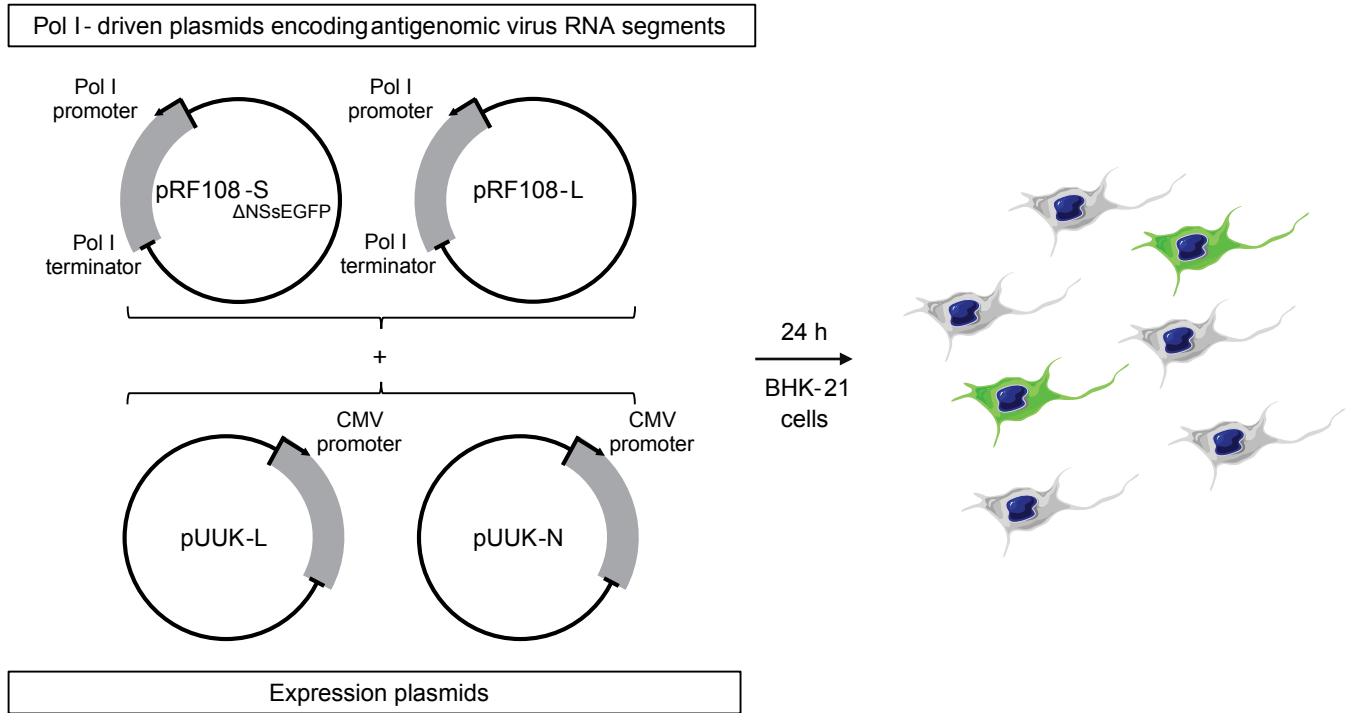

**B**

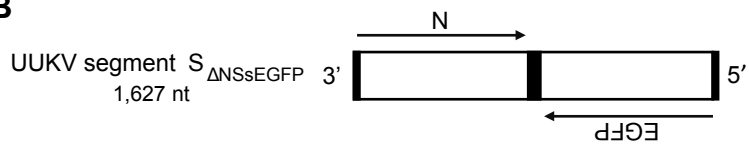

Supplement: 153598_1_supp_393387_px864t.pdf [file 153598_1_supp_393387_px864t.pdf]
